# Supplementary material
Source: PubMed Central journal article supplement (PMC7572632)

## Table of Contents

|                                                                                                    |     |
|----------------------------------------------------------------------------------------------------|-----|
| General Methods .....                                                                              | 2   |
| General procedures for the synthesis of 9, 3b, 3c, 14, 18, 19, 22, 26, 3k, 3k and 5 .....          | 3   |
| Synthesis and experimental data for 2-Substituted-Alkynyl-1-Sulfonyl Fluorides (SASFs) 2a-2v ..... | 10  |
| Synthesis and experimental data for compounds 4aa-4ax.....                                         | 20  |
| Synthesis and experimental data for compounds 4ba-4aj.....                                         | 30  |
| Synthesis and experimental data for compounds 4ca-4ar .....                                        | 35  |
| Synthesis and experimental data for compounds 4da-4dk .....                                        | 44  |
| Synthesis and experimental data for compounds 4ea-4ay .....                                        | 51  |
| Synthesis and experimental data for compounds 4fa-4fl.....                                         | 64  |
| Synthesis and experimental data for compounds 4ga-4an .....                                        | 71  |
| Synthesis and experimental data for compounds 4ha-4hj.....                                         | 78  |
| Synthesis and experimental data for compounds 4ia-4aj .....                                        | 84  |
| Synthesis and experimental data for compounds 4ja-4jl .....                                        | 90  |
| Synthesis and experimental data for compounds 4ka-4kj .....                                        | 97  |
| Synthesis and experimental data for compounds 4la-4lq.....                                         | 104 |
| Synthesis and experimental data for compounds 6a-6l .....                                          | 113 |
| LLAMA and principle moments of inertia (PMI) analysis for DOC and SuFEx libraries .....            | 119 |
| Antibacterial assays and method .....                                                              | 121 |
| References .....                                                                                   | 123 |
| X-ray crystallography data .....                                                                   | 124 |
| Experimental procedure for SuFEx reactions performed in a 96 well plate format .....               | 138 |
| Experimental procedure for SuFEx reactivity comparison .....                                       | 157 |
| <sup>1</sup> H, <sup>13</sup> C and <sup>19</sup> F NMR spectra .....                              | 158 |

## **General Methods**

The petroleum ether used refers to the fraction with 40-60 °C boiling point. Commercial solvents and reagents were used as supplied. Unless otherwise stated, all reactions were monitored by TLC on Polygram® SIL/G<sub>25</sub> plates and visualized using UV light and stained using basic KMnO<sub>4</sub>. <sup>1</sup>H, <sup>13</sup>C and <sup>19</sup>F NMR spectra were recorded on either a Bruker Ascend™ 400 (400 MHz), Bruker AV-400, Ultrashield™ 500 PLUS (500 MHz) or a Bruker AV-600 instrument as dilute solutions in the stipulated solvent. All chemical shifts (δ) are reported in parts per million (ppm) with <sup>1</sup>H and <sup>13</sup>C NMR referenced to solvent signals [<sup>1</sup>H NMR: CDCl<sub>3</sub> (7.27), DMSO-d<sub>6</sub> (2.50); <sup>13</sup>C NMR: CDCl<sub>3</sub> (77.16), DMSO-d<sub>6</sub> (39.52)]. Coupling constants (*J*) are reported in Hertz (Hz) and recorded after averaging. The multiplicity of the <sup>1</sup>H NMR signals are designated by one of the following abbreviations: s=singlet, d=doublet, t=triplet, q=quartet, hept=heptet, m=multiplet, br=broad signal. Infra-red spectra were recorded using an Agilent Cary 660 FT-IR spectrophotometer in ATR mode, with the peaks recorded as  $\nu_{\max}$  (cm<sup>-1</sup>). HRMS were obtained using an Agilent 6530 accurate-mass Q-TOF LC/MS in electrospray ionization (ESI) mode, a Waters I-Class LC equipped with a Waters BEH C18 column using a water/acetonitrile/formic acid gradient and ionized in APCI negative mode on a Waters G2-XS TOF or on a Xevo G2-S in Atmospheric Solids Analysis Probe (ASAP) mode. LC/MS data was collected using at Agilent 1200 infinity series quaternary LC using a Waters XTerra MS C18 Column (3.5 μm 4.6 x 100 mm) together with a Thermo Scientific™ *MSQ Plus*™ Mass Detector in atmospheric pressure chemical ionization (APCI) mode. GC-MS data was recorded on an Agilent 7890A GC system with an Agilent 5975C Inert MSD system in electron ionization (EI) mode. Flash column chromatography was performed using a Biotage® Isolera™ on Biotage® KP-Sil SNAP cartridges. Melting points data were collected using a Gallenkamp melting point apparatus.



## General procedures for the synthesis of 9, 3b, 3c, 14, 18, 19, 22, 26, 3k, 3k and 5

### Synthesis of imidoyl chlorides 9

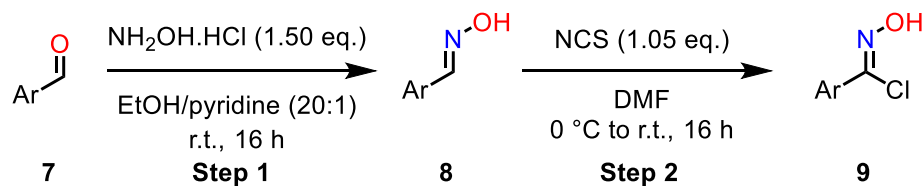

**Step 1:** Aldoximes 8 were synthesized by the dehydrative condensation of aldehydes 7 with  $\text{NH}_2\text{OH}$ .<sup>[1]</sup> A typical procedure: To a solution of  $\text{NH}_2\text{OH}\cdot\text{HCl}$  (1.50 eq.), in EtOH (1.00 mL/mmol), and pyridine (50.0  $\mu\text{L}/\text{mmol}$ ) was added the required aldehyde 7 (1.00 eq.) and stirred at room temperature for 16 h. The solvent was removed under reduced pressure and the residue extracted into ethyl acetate (5.00 mL/mmol), washed with  $\text{H}_2\text{O}$  (2 x 5.00 mL/mmol), dried over anhydrous  $\text{MgSO}_4$ , filtered under vacuum and the solvent was removed under reduced pressure to obtain the analytically pure product.

**Step 2:** Imidoyl chlorides 9 were synthesized through the chlorination of aldoximes 8 with *N*-chlorosuccinimide (NCS).<sup>[2]</sup> A typical procedure: To a solution of the required aldoxime 8 (1.00 eq.) in DMF (3.00 mL/mmol) stirring at 0 °C was added NCS (1.05 eq.) portion wise over 10 min. The reaction was then removed from the cold bath and stirred at room temperature for 16 h. The reaction mixture was extracted into EtOAc (5.00 mL/mmol), washed with brine (2 x 5.00 mL/mmol) and  $\text{H}_2\text{O}$  (3 x 5.00 mL/mmol), dried over anhydrous  $\text{MgSO}_4$ , filtered under vacuum and the solvent was removed under reduced pressure to obtain the analytically pure product.

### Synthesis of nitrones 3b

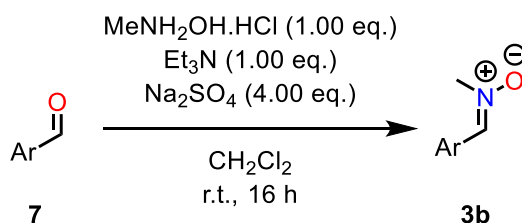

Nitrones 3b were synthesized by the dehydrative condensation of aldehydes 7 with  $\text{MeNH}_2\text{OH}$ .<sup>[3]</sup> A typical procedure: To a mixture of the required aldehyde 7 (1.00 eq.),  $\text{MeNH}_2\text{OH}\cdot\text{HCl}$  (1.00 eq.) and  $\text{Na}_2\text{SO}_4$  (4.00 eq.) in  $\text{CH}_2\text{Cl}_2$  (10.0 mL/mmol) was added  $\text{Et}_3\text{N}$  (1.00 eq.) and stirred at room temperature for 16 h. The solids were then removed by vacuum filtration and the solvent from the filtrate was removed under reduced pressure to obtain the analytically pure product.

### Synthesis of alkyl azides **3c**

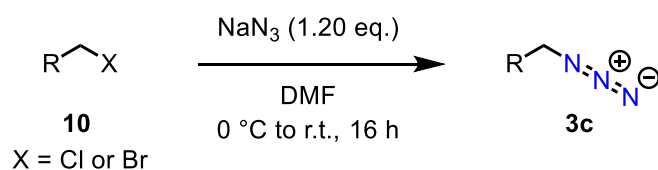

Azides **3c** were synthesized through the substitution reaction of alkyl halides **10** with  $\text{NaN}_3$ .<sup>[4]</sup> A typical procedure: To a solution of the required alkyl halide **10** (1.00 eq.) in DMF (3.00 mL/mmol) stirring at 0 °C was added  $\text{NaN}_3$  (1.20 eq.) portion wise over 10 min. The reaction was then removed from the cold bath and stirred at room temperature for 16 h. The reaction mixture was extracted into EtOAc (5.00 mL/mmol), washed with brine (2 x 5.00 mL/mmol) and  $\text{H}_2\text{O}$  (3 x 5.00 mL/mmol), dried over anhydrous  $\text{MgSO}_4$ , filtered under vacuum and the solvent was removed under reduced pressure to obtain the analytically pure product.

### Synthesis of hydrazonoyl chlorides **14**

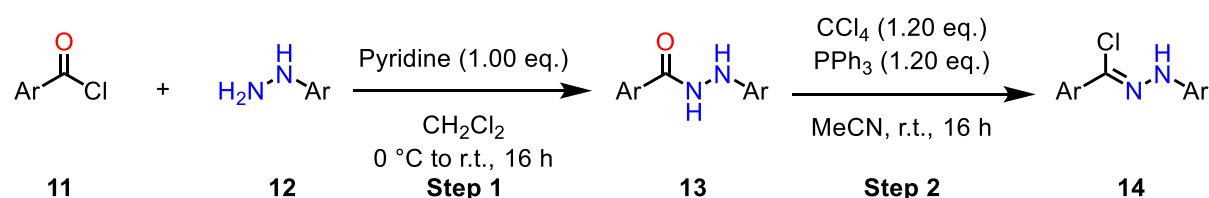

**Step 1:** Acylhydrazines **13** were synthesized through the coupling of acyl chlorides **11** and hydrazines **12**.<sup>[5]</sup> A typical procedure: To a solution of the required hydrazine **12** (1.00 eq.) in  $\text{CH}_2\text{Cl}_2$  (1.00 mL/mmol) at 0 °C was added pyridine (1.00 eq.) dropwise. To the reaction mixture was then added a solution of the required acyl chloride **11** (1.00 eq.) in  $\text{CH}_2\text{Cl}_2$  (250  $\mu\text{L}$ /mmol) dropwise and stirred at room temperature for 16 h. The reaction mixture was extracted into  $\text{CH}_2\text{Cl}_2$  (5.00 mL/mmol), washed with brine (5.00 mL/mmol) and  $\text{H}_2\text{O}$  (5.00 mL/mmol), dried over anhydrous  $\text{MgSO}_4$ , filtered under vacuum and the solvent was removed under reduced pressure. The crude mixture was then purified by flash column chromatography to obtain the analytically pure product.

**Step 2:** Hydrazonoyl chlorides **14** were synthesized through the chlorination of acylhydrazines **13** with carbon tetrachloride and triphenylphosphine.<sup>[5]</sup> A typical procedure: To a solution of the required acylhydrazone **13** (1.00 eq.) in MeCN (2.00 mL/mmol) was added carbon tetrachloride (1.20 eq.) and triphenylphosphine (1.20 eq.) and stirred at room temperature for 16 h. The solvent was removed under reduced pressure and the crude mixture was then purified by flash column chromatography to obtain the analytically pure product.

## Synthesis of Sydnones **18**

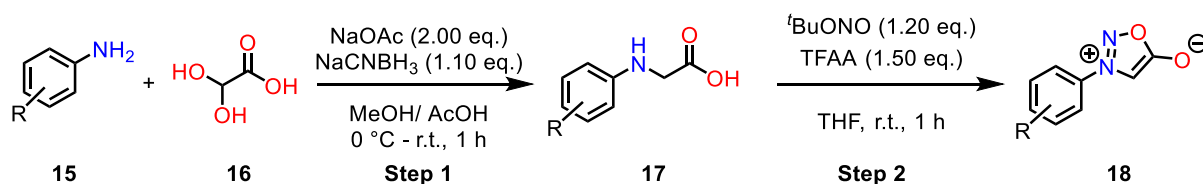

Sydnones **18** were synthesised from the corresponding aniline **15**, via a sequential reductive amination and cyclization reaction.<sup>[6]</sup> A typical procedure:

**Step 1:** To a solution of the required aniline **15** (1.00 eq.) in MeOH (1.00 mL/mmol) and glacial acetic acid (4.00 eq.) at 0 °C was added sodium acetate (2.00 eq.), glyoxylic acid monohydrate (1.50 eq.) and NaCNBH<sub>3</sub> (1.10 eq.) sequentially. The solution was stirred for 1 h, slowly warming to room temperature. The reaction mixture was then filtered through a short pad of silica gel and washed with 1.00% glacial acetic acid in EtOAc (80.0 mL). The solution was then washed with brine (3 x 80.0 mL), dried over anhydrous MgSO<sub>4</sub>, filtered under vacuum and the solvent was removed under reduced pressure to yield the crude carboxylic acid **17**, which was used without further purification.

**Step 2:** The crude carboxylic **17** was dissolved in THF (2.00 mL/mmol) and <sup>t</sup>BuONO (1.20 eq.) was added. The mixture was stirred at room temperature for 30 min, then TFAA (1.50 eq.) was added, and the resultant mixture stirred at room temperature for 1 h. The reaction was quenched with NaHCO<sub>3</sub> (sat. aq.) (10.0 mL/mmol) and extracted with EtOAc (10.0 mL/mmol). The organic layer was dried over anhydrous MgSO<sub>4</sub>, filtered under vacuum and the solvent was removed under reduced pressure. The crude product was purified by recrystallization (EtOH) to obtain the analytically pure product.

## Synthesis of iodosydnones **19**

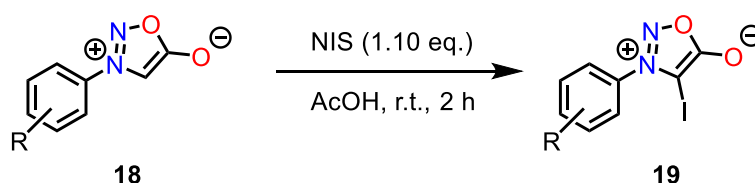

Iodosydnones **19** were synthesized by the iodination of Sydnones **18** with *N*-iodosuccinimide.<sup>[7]</sup> A typical procedure: To a suspension of the required Sydnone **18** (1.00 eq.) in AcOH (2.00 mL/ mmol) at room temperature was added *N*-iodosuccinimide (NIS) (1.10 eq.), and stirred at room temperature for 2 h. The reaction mixture was diluted with water (40.0 mL/ mmol) and the precipitate formed filtered under vacuum and dried to obtain the analytically pure product.

## Synthesis of substituted *N*-acetyl-*N*-arylglycines **22**

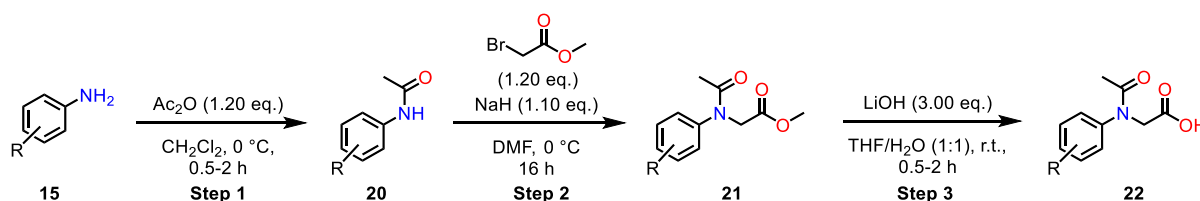

*N*-Acetyl-*N*-arylglycines **22** were synthesized from the corresponding aniline **15**, *via* sequential acetylation, alkylation and hydrolysis reactions.<sup>[8-10]</sup> A typical procedure:

**Step 1:**<sup>[8]</sup> To a solution of the required aniline **15** (1.00 eq.) in CH<sub>2</sub>Cl<sub>2</sub> (1.00 mL/mmol) at 0 °C was added acetic anhydride (1.20 eq.). The reaction was stirred at room temperature for 0.5-2 h and the reaction mixture was then extracted with CH<sub>2</sub>Cl<sub>2</sub> (5.00 mL/ mmol) and washed with NaHCO<sub>3</sub> (sat. aq.) (5.00 mL/mmol). The organic layer was dried over anhydrous MgSO<sub>4</sub>, filtered under vacuum and the solvent was removed under reduced pressure to obtain the analytically pure product.

**Step 2:**<sup>[9]</sup> To a solution of the required *N*-acetylaniline **20** (1.00 eq.) in anhydrous DMF (1.00 mL/mmol) at 0 °C was added sodium hydride (1.10 eq., 60% in mineral oil) in one portion. The reaction mixture was stirred at 0 °C for 0.5 h, then methyl bromoacetate (1.20 eq.) was added, and the reaction stirred at room temperature for a further 16 h. The reaction mixture was diluted with water (5.00 mL/mmol) and extracted into EtOAc (10.0 mL/mmol). The organic layer was washed with H<sub>2</sub>O (5 x 5.00 mL/mmol) and brine (5.00 mL/mmol), dried over anhydrous MgSO<sub>4</sub>, filtered under vacuum and the solvent was removed under reduced pressure. The crude product was purified by flash column chromatography to obtain the analytically pure product.

**Step 3:**<sup>[10]</sup> To a solution of the required methyl *N*-acetyl-*N*-arylglycinate **21** (1.00 eq.) in THF (2.00 mL/mmol) and water (2.00 mL/mmol) at room temperature was added lithium hydroxide (3.00 eq.). The reaction was stirred at room temperature for 0.5-2 h, and then the solvent was removed under reduced pressure. The crude mixture was suspended in water (10.0 mL/mmol) and acidified with conc. HCl. The precipitate formed was collected by filtration under vacuum to obtain the analytically pure product.

## Synthesis of 2-(benzoylthio)-2-arylacetic acids **26**

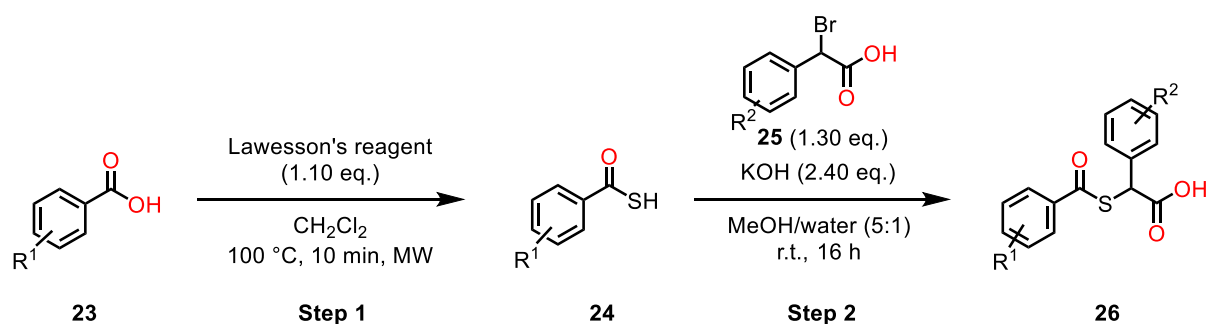

**Step 1:** Thiobenzoic acids **24** were synthesized by reaction of benzoic acids **23** with Lawesson's reagent.<sup>[11]</sup> A typical procedure: To a solution of the required benzoic acid **23** (1.00 eq.), in  $\text{CH}_2\text{Cl}_2$  (3.50 mL/mmol) was added Lawesson's reagent (1.10 eq.), the reaction vial was sealed and irradiated with microwaves at  $100^\circ\text{C}$  for 10 min. The reaction mixture was extracted into  $\text{CH}_2\text{Cl}_2$  (10.0 mL/mmol), washed with  $\text{H}_2\text{O}$  (2 x 10.0 mL/mmol), dried over anhydrous  $\text{MgSO}_4$ , filtered under vacuum and the solvent was removed under reduced pressure. The crude mixture was purified by flash column chromatography (0-10% EtOAc in petroleum ether) to obtain analytically pure product.

**Step 2:** 2-(Benzoylthio)-2-arylacetic acids **26** were synthesized by reaction of thiobenzoic acids **24** with bromo-2-arylacetic acids **25** under basic conditions.<sup>[12]</sup> A typical procedure: To a solution of KOH (3.50 eq.) in methanol (5.40 mL/mmol), and water (540  $\mu\text{L}$ /mmol) was added the required thiobenzoic acid **24** (1.00 eq.) and the required bromo-2-arylacetic acid **25** (1.30 eq.), and stirred at room temperature for 16 h. The solvent was removed under reduced pressure and extracted into  $\text{CH}_2\text{Cl}_2$  (15.0 mL/mmol), washed with 1M HCl (2 x 10.0 mL/mmol), dried over anhydrous  $\text{MgSO}_4$ , filtered under vacuum and the solvent was removed under reduced pressure. The crude mixture was purified by flash column chromatography (40-80% EtOAc in petroleum ether) to obtain the analytically pure product.

## Synthesis of azomethine imines **3j**

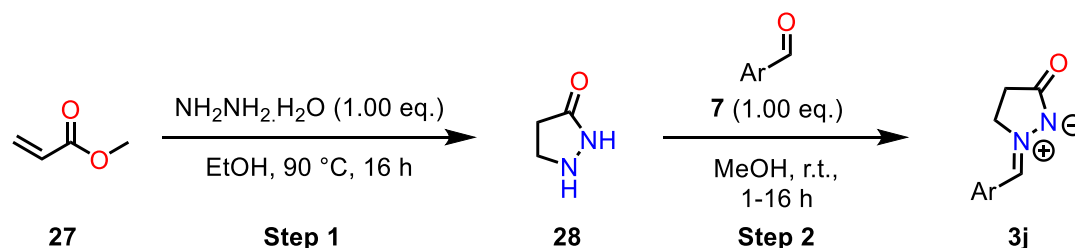

Azomethine imines **3j** were synthesized by the dehydrative condensation of the freshly prepared pyrazolidin-3-one **28** with benzaldehydes **7**.<sup>[13]</sup> A typical procedure:

**Step 1:** To a solution of  $\text{NH}_2\text{NH}_2\cdot\text{H}_2\text{O}$  (1.00 eq.) in EtOH (1.50 mL/mmol) at  $0^\circ\text{C}$ . was added methyl acrylate **27** (1.10 eq.) at  $0^\circ\text{C}$ . The reaction was stirred at room temperature for 10 min and then at  $90^\circ\text{C}$  for a further 16 h.

The solvent was removed under reduced pressure and the crude pyrazolidin-3-one **28** was used directly without further purification.

**Step 2:** The crude pyrazolidin-3-one **28** was dissolved in MeOH (1.00 mL/mmol) and the required aldehyde **7** (1.00 eq.) added at room temperature. The reaction mixture was stirred for 1-16 h, and the resultant precipitate collected by filtration under vacuum and washed with Et<sub>2</sub>O (10.0 mL/ mmol) to obtain the analytically pure product.

### Synthesis of azomethine ylides **3k**

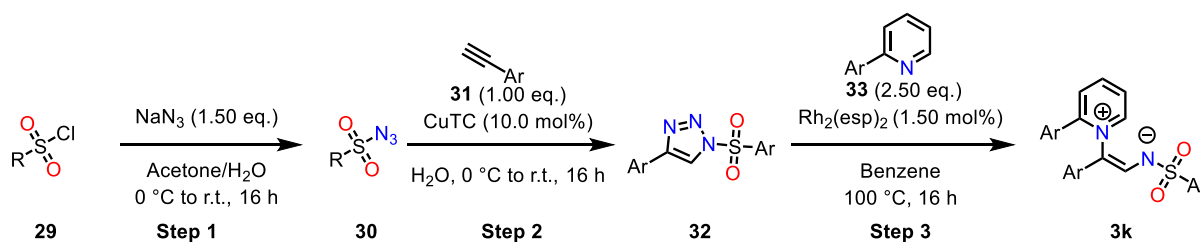

**Step 1:** Sulfonyl azides **30** were synthesized by the substitution reaction of sulfonyl chlorides **29** with sodium azide.<sup>[14]</sup> A typical procedure: To a solution of the required sulfonyl chloride **29** (1.00 eq.) in acetone (1.50 mL/mmol) and  $\text{H}_2\text{O}$  (400  $\mu\text{L}$ /mmol) at  $0\text{ }^\circ\text{C}$  was added sodium azide portion wise over 10 min. The reaction was then stirred at room temperature for 16 h and the solvent was then removed under reduced pressure. The crude mixture was extracted into EtOAc (5.00 mL/mmol), washed with brine (5.00 mL/mmol) and  $\text{H}_2\text{O}$  (2 x 5.00 mL/mmol), dried over anhydrous  $\text{MgSO}_4$ , filtered under vacuum and the solvent was removed under reduced pressure to obtain the analytically pure product.

**Step 2:** 1-Sulfonyltriazoles **32** were synthesized through a copper catalyzed azide-alkyne cycloaddition between sulfonyl azides **30** and alkynes **31**.<sup>[15]</sup> A typical procedure: To a suspension of the required alkyne **31** (1.00 eq.) and copper(I) thiophene-2-carboxylate ( $\text{CuTC}$ , 10.0 mol%) in  $\text{H}_2\text{O}$  (5.00 mL/mmol) at  $0\text{ }^\circ\text{C}$ , was added the required sulfonyl azide **30** (1.00 eq.) portion wise over 10 min. The reaction mixture was then stirred at room temperature for 16 h and extracted into EtOAc (5.00 mL/mmol), washed with  $\text{NH}_4\text{Cl}$  (sat. aq.) (5.00 mL/mmol) and  $\text{H}_2\text{O}$  (5.00 mL/mmol), dried over anhydrous  $\text{MgSO}_4$ , filtered under vacuum and the solvent was removed under reduced pressure. The crude mixture was purified by flash column chromatography to obtain the analytically pure product.

**Step 3:** Azomethine ylides **3k** were synthesized from the  $\text{Rh}_2(\text{esp})_2$  catalyzed reaction of 1-sulfonyltriazoles **32** and the pyridines **33**.<sup>[16]</sup> A typical procedure: To a solution of the required 1-sulfonyltriazole **32** (1.00 eq.) and  $\text{Rh}_2(\text{esp})_2$  (1.50 mol%) in benzene (10.0 mL/mmol) at room temperature was added the required pyridine **33** (2.50 eq.). The reaction was stirred at  $100\text{ }^\circ\text{C}$  for 16 h and the solvent was then removed under reduced pressure. The crude mixture was purified by flash column chromatography (0-10% MeOH in  $\text{CH}_2\text{Cl}_2$ ) to obtain the analytically pure product.

## Synthesis of aryl silyl ethers **5**

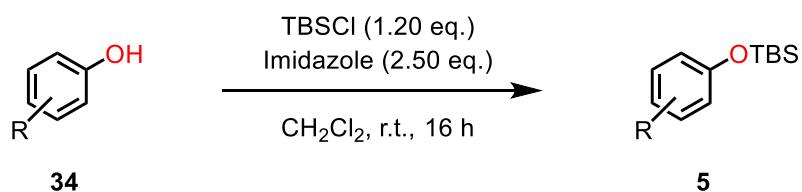

Aryl silyl ethers **5** were synthesised by the *tert*-butyldimethylsilyl (TBS) protection of phenols **34** with *tert*-butyldimethylsilyl chloride (TBSCl).<sup>[17]</sup> A typical procedure: To a solution of phenol **34** (1.00 eq.) and TBSCl (1.20 eq.) in CH<sub>2</sub>Cl<sub>2</sub> (4.00 mL/mmol) was added imidazole (2.50 eq.) and was stirred at room temperature for 16 h. The reaction mixture was extracted into EtOAc (5.00 mL/mmol), washed with 1N NaOH (5.00 mL/mmol) and H<sub>2</sub>O (5.00 mL/mmol), dried over anhydrous MgSO<sub>4</sub>, filtered under vacuum and the solvent was removed under reduced pressure. The crude mixture was purified by flash column chromatography to obtain the analytically pure product.

## Synthesis and experimental data for 2-Substituted-Alkynyl-1-Sulfonyl Fluorides (SASFs) 2a-2v

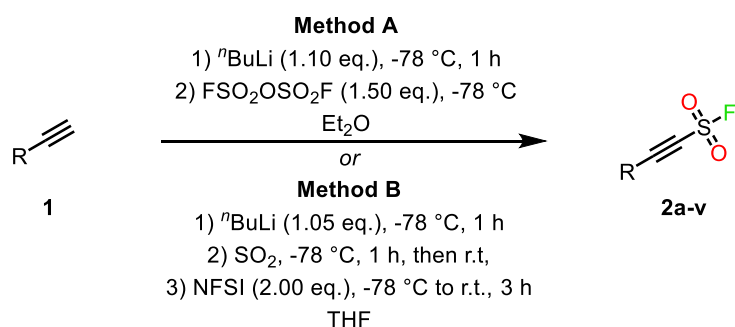

### Method A

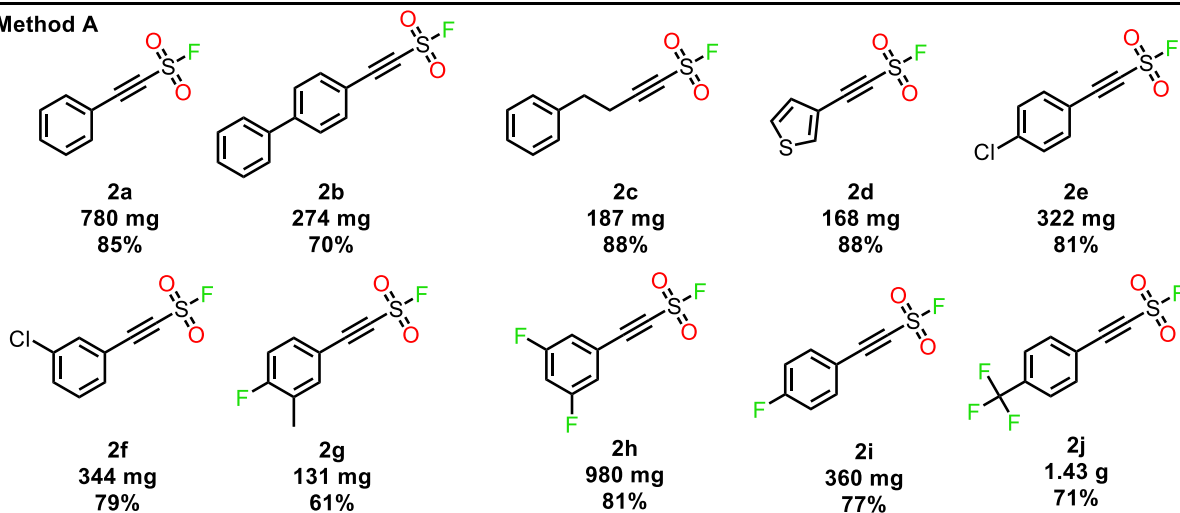

### Method B

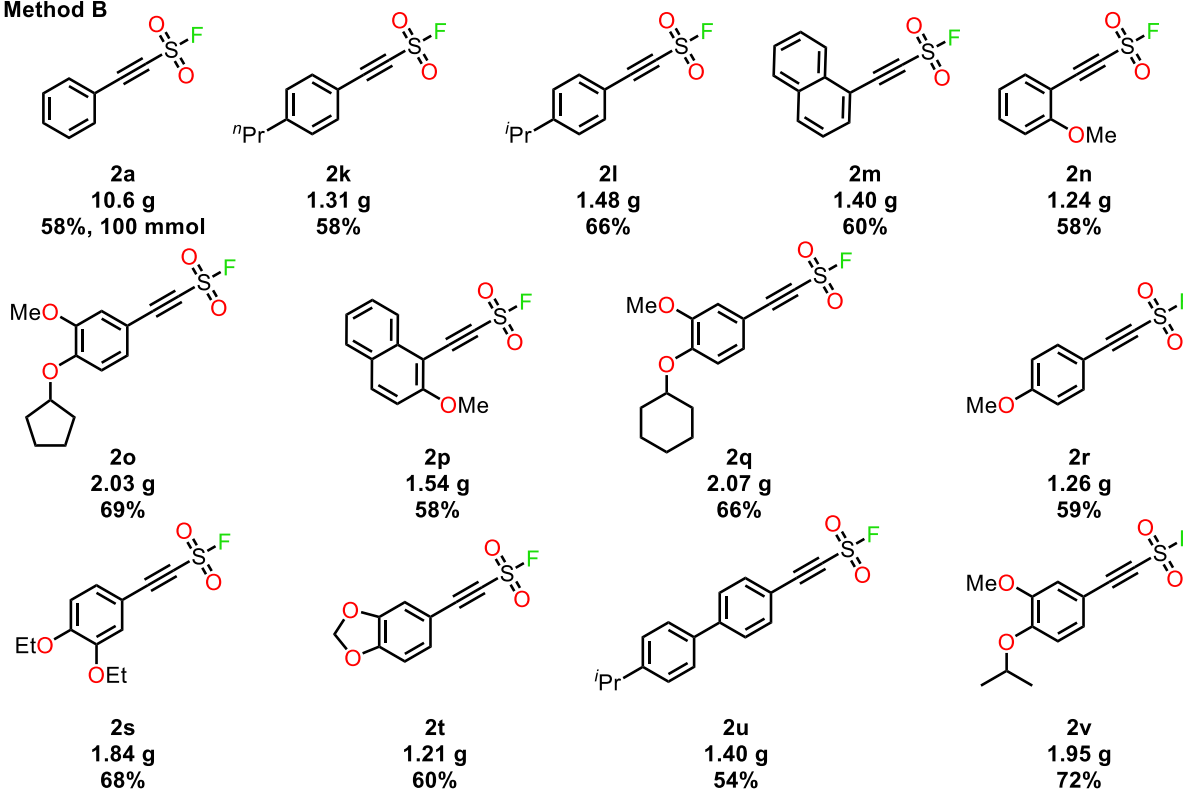



### General Procedure A

To a solution of the required terminal alkyne **1a-1j** (1.00 mmol) in diethyl ether (5.00 mL) at -78 °C was added <sup>n</sup>BuLi (1.05 eq.) dropwise. The resulting mixture was stirred at -78 °C for 0.5 h before the addition of fluorosulfonic anhydride (1.50 mmol, 1.50 eq.). After stirring at -78 °C for 0.5 h, the reaction was warmed to room temperature and the solvent was then removed under reduced pressure. The crude mixture was then purified by flash column chromatography (5% EtOAc in hexanes) to obtain the analytically pure product.

### General Procedure B

To a solution of the required terminal alkyne **1a, 1k-1v** (10.0 mmol) in anhydrous THF (10.0 mL) at -78 °C was added <sup>n</sup>BuLi (1.05 eq.) dropwise and stirred at -78 °C for 1 h. To the cooled reaction mixture was added a balloon of SO<sub>2</sub> by cannula, first bubbled through conc. H<sub>2</sub>SO<sub>4</sub> (20.0 mL) and stirred at -78 °C for 1 h. The reaction mixture was warmed to room temperature and the remaining SO<sub>2</sub> removed by vacuum, purging with argon. The reaction mixture was then diluted with anhydrous THF (20.0 mL), cooled to -78 °C and *N*-fluorobenzenesulfonimide (6.30 g, 20.0 mmol) was added in one portion and removed from the cold bath, and stirred at room temperature for 3 h. The mixture was then filtered, the solvent removed under reduced pressure, redissolved in the minimum amount of diethyl ether, triturated with petroleum ether (50.0 mL), the solid removed by filtration and removal of the filtrate solvent under reduced pressure. The crude mixture was purified by flash column chromatography to obtain the analytically pure product.

### 2-Phenylethyne-1-sulfonyl fluoride (2a)

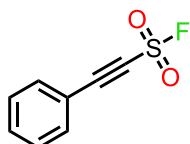

#### Method A

Following general procedure A (5.00 mmol of the required alkyne), the title compound was isolated as a yellow oil (780 mg, 85%). <sup>1</sup>H NMR (500 MHz, CDCl<sub>3</sub>) δ = 7.70 – 7.67 (m, 2H), 7.64 – 7.60 (m, 1H), 7.51 – 7.47 (m, 2H); <sup>13</sup>C NMR (126 MHz, CDCl<sub>3</sub>) δ = 133.6, 133.2, 129.2, 95.4 (d, *J* = 8.1 Hz), 77.0 (d, *J* = 60.9 Hz); <sup>19</sup>F NMR (471 MHz, CDCl<sub>3</sub>) δ = 74.8; HRMS (ASAP): calculated for C<sub>8</sub>H<sub>6</sub>FO<sub>2</sub>S [M+H]: *m/z* = 185.0072, *m/z* found 185.0069; IR ν<sub>max</sub> (ATR)/cm<sup>-1</sup>: 3069, 2192, 1422, 1249, 1203, 870.

#### Method B

Following general procedure B (100 mmol of the required alkyne), the title compound was isolated after purification by flash column chromatography (petroleum ether) as a yellow oil (10.6 g, 58%). <sup>1</sup>H NMR (500 MHz, CDCl<sub>3</sub>) δ = 7.70 – 7.67 (m, 2H), 7.64 – 7.60 (m, 1H), 7.51 – 7.47 (m, 2H); <sup>13</sup>C NMR (126 MHz, CDCl<sub>3</sub>) δ = 133.6, 133.2, 129.2, 95.4 (d, *J* = 8.1 Hz), 77.0 (d, *J* = 60.9 Hz); <sup>19</sup>F NMR (471 MHz, CDCl<sub>3</sub>) δ = 74.8; HRMS (ASAP): calculated

for  $C_8H_6FO_2S$   $[M+H]^+$ :  $m/z = 185.0072$ ,  $m/z$  found 185.0069; **IR**  $v_{max}$  (ATR)/ $cm^{-1}$ : 3069, 2192, 1422, 1249, 1203, 870.

#### 1,1'-Biphenylethynyl sulfonyl fluoride (2b)

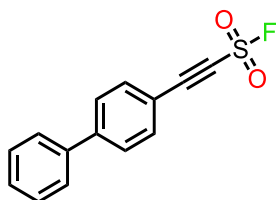

Following general procedure A (1.50 mmol of the required alkyne), the title compound was isolated as a pale yellow solid (274 mg, 70%). **m.p.** 92.4 °C;  **$^1H$  NMR** (400 MHz,  $CDCl_3$ )  $\delta$  7.75 (appt. d,  $J = 8.1$  Hz, 2H), 7.70 (appt. d,  $J = 7.6$  Hz, 2H), 7.61 (appt. d,  $J = 7.6$  Hz, 2H), 7.50 (appt. t,  $J = 7.2$  Hz, 2H), 7.48 – 7.40 (m, 1H);  **$^{13}C$  NMR** (151 MHz,  $CDCl_3$ )  $\delta$  146.0, 139.3, 134.1, 129.3, 128.9, 127.8, 127.4, 114.5, 95.8 (d,  $J = 8.1$  Hz), 77.5 (d,  $J = 60.8$  Hz);  **$^{19}F$  NMR** (376 MHz,  $CDCl_3$ )  $\delta$  74.3; **GC-MS** (EI) calculated for  $C_{14}H_9FO_2S$   $[M]^+$ : calculated  $m/z = 260.03$ ,  $m/z$  found 259.9.

#### 4-Phenylbut-1-ynyl sulfonyl fluoride (2c)

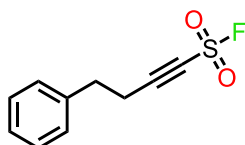

Following general procedure A (1.00 mmol of the required alkyne), the title compound was isolated as a yellow oil (187 mg, 89%).  **$^1H$  NMR** (400 MHz,  $CDCl_3$ )  $\delta$  7.40 – 7.32 (m, 2H), 7.32 – 7.26 (m, 1H), 7.24 – 7.18 (m, 2H), 2.97 (t,  $J = 7.3$  Hz, 2H), 2.80 (td,  $J = 7.3, 2.1$ , 2H);  **$^{13}C$  NMR** (151 MHz,  $CDCl_3$ )  $\delta$  138.3, 129.0, 128.4, 127.4, 98.8 (d,  $J = 7.8$  Hz), 70.6 (d,  $J = 60.1$  Hz), 32.9, 21.3;  **$^{19}F$  NMR** (376 MHz,  $CDCl_3$ )  $\delta$  73.5; **HRMS** (APCI): calculated for  $C_{10}H_8FO_2S$   $[M-H]^-$ :  $m/z = 211.0229$ ,  $m/z$  found 211.0231.

#### (Thiophen-3-yl)ethynyl sulfonyl fluoride (2d)

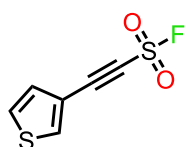

Following general procedure A (1.00 mmol of the required alkyne), the title compound was isolated as a yellow oil (168 mg, 88%).  **$^1H$  NMR** (400 MHz,  $CDCl_3$ )  $\delta$  8.00 (dd,  $J = 3.1, 1.6$  Hz, 1H), 7.51 – 7.36 (m, 1H), 7.32 (dd,  $J = 5.2$ ,

1.6 Hz, 1H);  $^{13}\text{C}$  NMR (151 MHz,  $\text{CDCl}_3$ )  $\delta$  137.5, 130.0, 127.4, 115.3, 91.3 (d,  $J = 8.2$  Hz), 77.1 (d,  $J = 61.0$  Hz);  $^{19}\text{F}$  NMR (376 MHz,  $\text{CDCl}_3$ )  $\delta$  74.3; HRMS (APCI): calculated for  $\text{C}_7\text{H}_4\text{FO}_4\text{S}_2$  [ $\text{M}+\text{CH}_2\text{O}_2$ ] $^-$ :  $m/z = 234.9535$ ,  $m/z$  found 234.9532.

#### 4-Chlorophenylethynyl sulfonyl fluoride (2e)

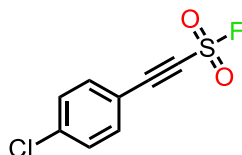

Following general procedure A (1.80 mmol of the required alkyne), the title compound was isolated as a yellow solid (322 mg, 81%). **m.p.** 78.6 °C;  $^1\text{H}$  NMR (400 MHz,  $\text{CDCl}_3$ )  $\delta$  7.62 (appt. d,  $J = 8.2$  Hz, 2H), 7.47 (appt. d,  $J = 8.2$  Hz, 2H);  $^{13}\text{C}$  NMR (151 MHz,  $\text{CDCl}_3$ )  $\delta$  140.0, 134.7, 129.8, 114.4, 94.0 (d,  $J = 8.2$  Hz), 77.8 (d,  $J = 61.3$  Hz);  $^{19}\text{F}$  NMR (376 MHz,  $\text{CDCl}_3$ )  $\delta$  74.4; HRMS (APCI): calculated for  $\text{C}_9\text{H}_5\text{ClFO}_4\text{S}$  [ $\text{M}+\text{CH}_2\text{O}_2$ ] $^-$ :  $m/z = 262.9581$ ,  $m/z$  found 262.9576.

#### 3-Chlorophenylethynyl sulfonyl fluoride (2f)

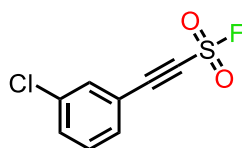

Following general procedure A (2.00 mmol of the required alkyne), the title compound was isolated as a yellow oil (344 mg, 79%).  $^1\text{H}$  NMR (400 MHz,  $\text{CDCl}_3$ )  $\delta$  7.67 (t,  $J = 1.8$  Hz, 1H), 7.63 – 7.53 (m, 2H), 7.43 (t,  $J = 7.9$  Hz, 1H);  $^{13}\text{C}$  NMR (151 MHz,  $\text{CDCl}_3$ )  $\delta$  135.3, 133.5, 133.1, 131.6, 130.5, 117.7, 93.1 (d,  $J = 8.1$  Hz), 77.7 (d,  $J = 61.5$  Hz);  $^{19}\text{F}$  NMR (376 MHz,  $\text{CDCl}_3$ )  $\delta$  74.4; HRMS (APCI): calculated for  $\text{C}_9\text{H}_5\text{ClFO}_4\text{S}$  [ $\text{M}+\text{CH}_2\text{O}_2$ ] $^-$ :  $m/z = 262.9581$ ,  $m/z$  found 262.9578.

#### 4-Fluoro-3-methylphenylethynyl sulfonyl fluoride (2g)

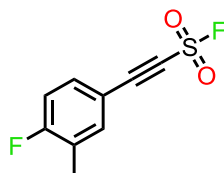

Following general procedure A (1.00 mmol of the required alkyne), the title compound was isolated as a yellow oil (131 mg, 61%).  $^1\text{H}$  NMR (400 MHz,  $\text{CDCl}_3$ )  $\delta$  7.66 – 7.46 (m, 2H), 7.11 (t,  $J = 8.8$  Hz, 1H), 2.32 (d,  $J = 2.1$  Hz, 3H);  $^{13}\text{C}$  NMR (151 MHz,  $\text{CDCl}_3$ )  $\delta$  164.2 (d,  $J = 256.2$  Hz), 137.1 (d,  $J = 6.7$  Hz), 133.5 (d,  $J = 9.4$  Hz), 127.1 (d,  $J = 18.6$

Hz), 116.5 (d,  $J = 24.0$  Hz), 111.8 (d,  $J = 4.1$  Hz), 95.0 (d,  $J = 8.2$  Hz), 76.5 (d,  $J = 1.7$  Hz), 14.5 (d,  $J = 3.4$  Hz);  $^{19}\text{F}$  NMR (376 MHz,  $\text{CDCl}_3$ )  $\delta$  74.3, -106.4; HRMS (APCI): calculated for  $\text{C}_{10}\text{H}_7\text{F}_2\text{O}_4\text{S}$  [ $\text{M}+\text{CH}_2\text{O}_2$ ]:  $m/z = 261.0033$ ,  $m/z$  found 261.0034.

### 3,5-Difluoro-phenylethynyl sulfonyl fluoride (2h)

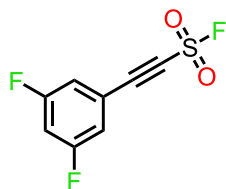

Following general procedure A (5.50 mmol of the required alkyne), the title compound was isolated as a pale yellow solid (980 mg, 81%). **m.p.** 48.8 °C;  $^1\text{H}$  NMR (400 MHz,  $\text{CDCl}_3$ )  $\delta$  7.24 – 7.20 (m, 2H), 7.09 (td,  $J = 8.6, 2.1$  Hz, 1H);  $^{13}\text{C}$  NMR (151 MHz,  $\text{CDCl}_3$ )  $\delta$  162.9 (dd,  $J = 253.3, 12.7$  Hz), 118.6 (t,  $J = 11.5$  Hz), 116.7 (dd,  $J = 21.7, 6.6$  Hz), 109.7 (t,  $J = 25.0$  Hz), 91.4 (dt,  $J = 8.1, 4.0$  Hz), 78.0 (d,  $J = 62.0$  Hz);  $^{19}\text{F}$  NMR (376 MHz,  $\text{CDCl}_3$ )  $\delta$  74.5, -106.5; HRMS (APCI): calculated for  $\text{C}_8\text{H}_3\text{F}_3\text{O}_2\text{S}$  [ $\text{M}$ ]:  $m/z = 219.9806$ ,  $m/z$  found 219.9813.

### 4-Fluorophenylethynyl sulfonyl fluoride (2i)

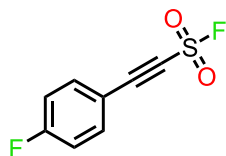

Following general procedure A (2.30 mmol of the required alkyne), the title compound was isolated as a yellow oil (360 mg, 77%).  $^1\text{H}$  NMR (400 MHz,  $\text{CDCl}_3$ )  $\delta$  7.78 – 7.64 (m, 2H), 7.23 – 7.13 (m, 2H);  $^{13}\text{C}$  NMR (151 MHz,  $\text{CDCl}_3$ )  $\delta$  165.4 (d,  $J = 257.8$  Hz), 136.2 (d,  $J = 9.5$  Hz), 117.0 (d,  $J = 22.6$  Hz), 112.2 (d,  $J = 3.5$  Hz), 94.4 (d,  $J = 8.2$  Hz), 77.0 (dd,  $J = 60.9, 1.6$  Hz);  $^{19}\text{F}$  NMR (376 MHz,  $\text{CDCl}_3$ )  $\delta$  74.3, -101.9; GC-MS (EI) calculated for  $\text{C}_8\text{H}_4\text{F}_4\text{O}_2\text{S}$  [ $\text{M}$ ] $^+$ : Calculated  $m/z = 201.99$ ,  $m/z$  found: 202.0

### 4-Trifluoromethylphenylethynyl sulfonyl fluoride (2j)

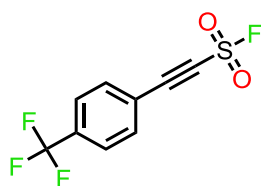

Following general procedure A (8.00 mmol of required alkyne), the title compound was isolated as a yellow solid (1.43 g, 71%). **m.p.** 74.6 °C;  $^1\text{H}$  NMR (400 MHz,  $\text{CDCl}_3$ )  $\delta$  7.82 (appt. d,  $J = 8.1$  Hz, 2H), 7.75 (appt. d,  $J = 8.1$  Hz,

2H);  $^{13}\text{C NMR}$  (151 MHz,  $\text{CDCl}_3$ )  $\delta$  134.6 (q,  $J = 33.4$  Hz), 133.9, 126.2 (q,  $J = 3.6$  Hz), 123.3 (q,  $J = 273.0$  Hz), 119.8, 92.6 (d,  $J = 8.2$  Hz), 78.4 (d,  $J = 61.7$  Hz);  $^{19}\text{F NMR}$  (376 MHz,  $\text{CDCl}_3$ )  $\delta$  74.5, -64.0; **HRMS** (APCI): calculated for  $\text{C}_9\text{H}_4\text{F}_4\text{O}_2\text{S}$   $[\text{M}]^-$ :  $m/z = 251.9869$ , HRMS found: 251.9868.

#### 2-(4-Propylphenyl)ethyne-1-sulfonyl fluoride (2k)

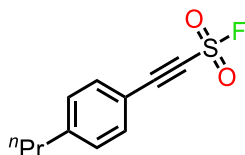

Following general procedure B, the title compound was isolated after purification by flash column chromatography (petroleum ether) as a yellow oil (1.31 g, 58%).  $^1\text{H NMR}$  (400 MHz,  $\text{CDCl}_3$ )  $\delta$  7.60 (appt. d,  $J = 8.4$  Hz, 2H), 7.29 (appt. d,  $J = 8.5$  Hz, 2H), 2.70 – 2.61 (m, 2H), 1.74 – 1.60 (m, 2H), 0.96 (t,  $J = 7.3$  Hz, 3H);  $^{13}\text{C NMR}$  (126 MHz,  $\text{CDCl}_3$ )  $\delta$  149.1, 133.6, 129.4, 113.1, 96.4 (d,  $J = 8.1$  Hz), 76.7 (d,  $J = 60.4$  Hz), 38.4, 24.2, 13.8.  $^{19}\text{F NMR}$  (471 MHz,  $\text{CDCl}_3$ )  $\delta$  74.8; **HRMS** (ASAP): calculated for  $\text{C}_{11}\text{H}_{12}\text{FO}_2\text{S}$   $[\text{M}+\text{H}]^+$ :  $m/z = 227.0542$ ,  $m/z$  found 227.0540; **IR**  $\nu_{\text{max}}$  (ATR)/ $\text{cm}^{-1}$ : 2964, 2874, 2187, 1605, 1422, 1206, 875, 785.

#### 2-(4-isopropylphenyl)ethyne-1-sulfonyl fluoride (2l)

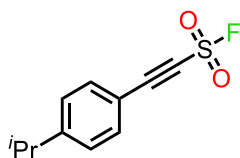

Following general procedure B, the title compound was isolated after purification by flash column chromatography (petroleum ether) as a yellow oil (1.48 g, 66%).  $^1\text{H NMR}$  (500 MHz,  $\text{CDCl}_3$ )  $\delta$  7.61 (appt. d,  $J = 8.3$  Hz, 2H), 7.34 (appt. d,  $J = 8.0$  Hz, 2H), 2.98 (hept,  $J = 6.9$  Hz, 1H), 1.28 (d,  $J = 6.9$  Hz, 7H);  $^{13}\text{C NMR}$  (126 MHz,  $\text{CDCl}_3$ )  $\delta$  155.1, 133.8, 127.5, 113.2, 96.4 (d,  $J = 8.0$  Hz), 76.4, 34.7, 23.7;  $^{19}\text{F NMR}$  (376 MHz,  $\text{CDCl}_3$ )  $\delta$  74.8; **HRMS** (ASAP): calculated for  $\text{C}_{11}\text{H}_{12}\text{FO}_2\text{S}$   $[\text{M}+\text{H}]^+$ :  $m/z = 227.0542$ ,  $m/z$  found 227.0544; **IR**  $\nu_{\text{max}}$  (ATR)/ $\text{cm}^{-1}$ : 2967, 2875, 2187, 1605, 1422, 1206, 874, 790.

### 2-(Naphthalen-1-yl)ethyne-1-sulfonyl fluoride (2m)

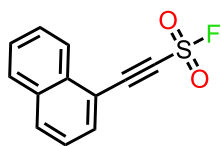

Following general procedure B, the title compound was isolated after purification by flash column chromatography (0-2% EtOAc in petroleum ether) as a brown solid (1.40 g, 60%). **m.p.** 39 - 40 °C; **<sup>1</sup>H NMR** (500 MHz, CDCl<sub>3</sub>) δ 8.21 – 8.18 (m, 1H), 8.11 (appt. d, *J* = 8.3 Hz, 1H), 7.98 (dd, *J* = 7.2, 1.2 Hz, 1H), 7.97 – 7.94 (m, 1H), 7.74 – 7.70 (m, 1H), 7.66 – 7.62 (m, 1H), 7.55 (dd, *J* = 8.3, 7.2 Hz, 1H); **<sup>13</sup>C NMR** (126 MHz, CDCl<sub>3</sub>) δ 134.8, 134.1, 133.5, 133.0, 129.1, 128.9, 127.8, 125.2, 125.1, 113.4, 94.8 (d, *J* = 8.2 Hz), 81.3 (d, *J* = 60.9 Hz); **<sup>19</sup>F NMR** (376 MHz, CDCl<sub>3</sub>) δ 75.2; **HRMS** (ASAP): calculated for C<sub>12</sub>H<sub>8</sub>FO<sub>2</sub>S [M+H]: *m/z* = 234.0151, *m/z* found 234.0153; **IR** *v*<sub>max</sub> (ATR)/cm<sup>-1</sup>: 3060, 2182, 1416, 1202, 891, 797, 767.

### 2-(2-Methoxyphenyl)ethyne-1-sulfonyl fluoride (2n)

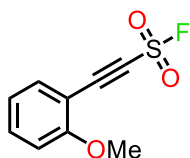

Following general procedure B, the title compound was isolated after purification by flash column chromatography (0-4% Et<sub>2</sub>O in petroleum ether) as a low melting yellow solid (1.24 g, 58%). **<sup>1</sup>H NMR** (500 MHz, CDCl<sub>3</sub>) δ = 7.59 – 7.53 (m, 2H), 7.02 (td, *J* = 7.6, 0.8 Hz, 1H), 6.97 (d, *J* = 8.4 Hz, 1H), 3.94 (s, 3H); **<sup>13</sup>C NMR** (126 MHz, CDCl<sub>3</sub>) δ = 162.9, 135.3, 135.0, 121.0, 111.3, 105.4, 93.8 (d, *J* = 8.1 Hz), 80.4 (d, *J* = 60.4 Hz), 56.1; **<sup>19</sup>F NMR** (376 MHz, CDCl<sub>3</sub>) δ = 74.7; **HRMS** (ASAP): calculated for C<sub>9</sub>H<sub>8</sub>FO<sub>3</sub>S [M+H]: *m/z* = 214.0100, *m/z* found 214.0098; **IR** *v*<sub>max</sub> (ATR)/cm<sup>-1</sup>: 2950, 2844, 2187, 1598, 1491, 1418, 1267, 1200, 1020, 880, 791, 752.

### 2-(4-(Cyclopentyloxy)-3-methoxyphenyl)ethyne-1-sulfonyl fluoride (2o)

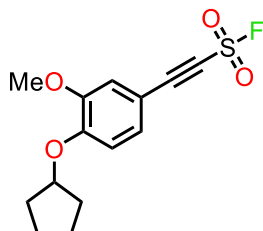

Following general procedure B, the title compound was isolated after purification by flash column chromatography (0-5% EtOAc in petroleum ether) as a yellow solid (2.03 g, 69%). **m.p.** 59 - 61 °C; **<sup>1</sup>H NMR** (500 MHz, CDCl<sub>3</sub>) δ 7.30 (dd, *J* = 8.4, 1.8 Hz, 1H), 7.09 (d, *J* = 1.8 Hz, 1H), 6.89 (d, *J* = 8.4 Hz, 1H), 4.87 – 4.82 (m, 1H),

3.88 (s, 3H), 2.04 – 1.96 (m, 2H), 1.95 – 1.81 (m, 4H), 1.70 – 1.61 (m, 2H); <sup>13</sup>C NMR (126 MHz, CDCl<sub>3</sub>) δ 152.7, 149.9, 128.4, 115.7, 113.9, 106.7, 97.7 (d, *J* = 8.1 Hz), 81.0, 76.2 (d, *J* = 60.3 Hz), 56.3, 33.0, 24.3; <sup>19</sup>F NMR (376 MHz, CDCl<sub>3</sub>) δ 74.8; HRMS (ASAP): calculated for C<sub>14</sub>H<sub>16</sub>FO<sub>4</sub>S [M+H]: *m/z* = 299.0753, *m/z* found 299.0754; IR ν<sub>max</sub> (ATR)/cm<sup>-1</sup>: 2966, 2952, 2170, 1592, 1507, 1415, 1212, 1054, 1025, 962, 799, 766.

#### 2-(2-Methoxynaphthalen-1-yl)ethyne-1-sulfonyl fluoride (2p)

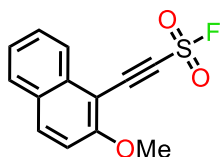

Following general procedure B, the title compound was isolated after purification by flash column chromatography (0-5% EtOAc in petroleum ether) as a yellow solid (1.54 g, 58%). **m.p.** 100 - 101 °C (decomposed); <sup>1</sup>H NMR (500 MHz, CDCl<sub>3</sub>) δ 8.07 – 8.02 (m, 2H), 7.86 – 7.83 (m, 1H), 7.67 – 7.62 (m, 1H), 7.49 – 7.44 (m, 1H), 7.27 (d, *J* = 9.2 Hz, 1H), 4.08 (s, 3H); <sup>13</sup>C NMR (126 MHz, CDCl<sub>3</sub>) δ = 164.0, 136.1, 134.7, 129.6, 128.9, 128.1, 125.4, 124.0, 112.0, 98.6, 93.9 (d, *J* = 8.2 Hz), 85.6 (d, *J* = 60.1 Hz), 56.8; <sup>19</sup>F NMR (471 MHz, CDCl<sub>3</sub>) δ = 75.2; HRMS (ASAP): calculated for C<sub>13</sub>H<sub>10</sub>FO<sub>3</sub>S [M+H]: *m/z* = 265.0335, *m/z* found 265.0335; IR ν<sub>max</sub> (ATR)/cm<sup>-1</sup>: 2928, 2854, 2167, 1589, 1508, 1408, 1263, 1214, 1187, 1098, 1056, 788, 753.

#### 2-(4-(Cyclohexyloxy)-3-methoxyphenyl)ethyne-1-sulfonyl fluoride (2q)

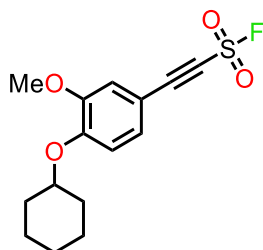

Following general procedure B, the title compound was isolated after purification by flash column chromatography (0-5% EtOAc in petroleum ether) as a yellow solid (2.07 g, 66%). **m.p.** 51 - 52 °C; <sup>1</sup>H NMR (400 MHz, CDCl<sub>3</sub>) δ 7.29 (dd, *J* = 8.4, 1.9 Hz, 1H), 7.10 (d, *J* = 1.9 Hz, 1H), 6.92 (d, *J* = 8.5 Hz, 1H), 4.39 – 4.30 (m, 1H), 3.89 (s, 3H), 2.09 – 1.99 (m, 2H), 1.90 – 1.81 (m, 2H), 1.67 – 1.58 (m, 3H), 1.45 – 1.29 (m, 3H); <sup>13</sup>C NMR (126 MHz, CDCl<sub>3</sub>) δ 152.3, 150.2, 128.4, 116.0, 114.2, 106.9, 97.6 (d, *J* = 8.1 Hz), 77.2, 76.2 (d, *J* = 60.3 Hz), 56.4, 31.7, 25.5, 24.0; <sup>19</sup>F NMR (376 MHz, CDCl<sub>3</sub>) δ 74.8; HRMS (ASAP): calculated for C<sub>15</sub>H<sub>18</sub>FO<sub>4</sub>S [M+H]: *m/z* = 313.0910, *m/z* found 313.0910; IR ν<sub>max</sub> (ATR)/cm<sup>-1</sup>: 3091, 2939, 2857, 2162, 1590, 1507, 1414, 1275, 1245, 1212, 1141, 960, 815.

### 2-(4-Methoxyphenyl)ethyne-1-sulfonyl fluoride (2r)

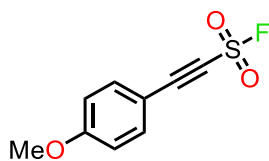

Following general procedure B, the title compound was isolated after purification by flash column chromatography (0-2% EtOAc in petroleum ether) as a yellow solid (1.26 g, 59%). **m.p.** 41 - 43 °C; **<sup>1</sup>H NMR** (500 MHz, CDCl<sub>3</sub>) δ = 7.63 (d, *J* = 9.0 Hz, 2H), 6.97 (d, *J* = 9.0 Hz, 2H), 3.89 (s, 3H); **<sup>13</sup>C NMR** (126 MHz, CDCl<sub>3</sub>) δ = 163.5, 135.8, 115.0, 107.5, 97.1 (d, *J* = 8.1 Hz), 76.6 (d, *J* = 60.4 Hz), 55.8; **<sup>19</sup>F NMR** (471 MHz, CDCl<sub>3</sub>) δ = 74.8; **HRMS** (ASAP): calculated for C<sub>9</sub>H<sub>8</sub>FO<sub>3</sub>S [M+H]: *m/z* = 214.0100, *m/z* found 214.0096; **IR** *v*<sub>max</sub> (ATR)/cm<sup>-1</sup>: 2930, 2851, 2184, 1602, 1510, 1418, 1254, 1205, 1172, 877, 795.

### 2-(3,4-Diethoxyphenyl)ethyne-1-sulfonyl fluoride (2s)

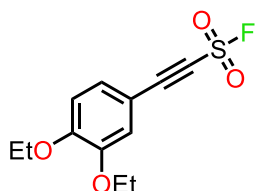

Following general procedure B, the title compound was isolated after purification by flash column chromatography (0-4% EtOAc in petroleum ether) as a beige solid (1.84 g, 68%). **m.p.** 53 - 54 °C; **<sup>1</sup>H NMR** (500 MHz, CDCl<sub>3</sub>) δ = 7.30 (dd, *J* = 8.4, 1.9 Hz, 1H), 7.10 (d, *J* = 1.9 Hz, 1H), 6.89 (d, *J* = 8.4 Hz, 1H), 4.17 (q, *J* = 7.0 Hz, 2H), 4.11 (q, *J* = 7.0 Hz, 2H), 1.49 (appt. q, *J* = 7.0 Hz, 6H); **<sup>13</sup>C NMR** (126 MHz, CDCl<sub>3</sub>) δ = 153.5, 148.8, 128.5, 116.9, 112.6, 107.1, 97.6 (d, *J* = 8.1 Hz), 76.2 (d, *J* = 60.4 Hz), 65.0, 64.9, 14.7, 14.7; **<sup>19</sup>F NMR** (376 MHz, CDCl<sub>3</sub>) δ = 74.8; **HRMS** (ASAP): calculated for C<sub>12</sub>H<sub>14</sub>FO<sub>4</sub>S [M+H]: *m/z* = 273.0597, *m/z* found 273.0597; **IR** *v*<sub>max</sub> (ATR)/cm<sup>-1</sup>: 2978, 2934, 2167, 1592, 1514, 1409, 1247, 1209, 1138, 1039, 806.

### 2-(Benzo[d][1,3]dioxol-5-yl)ethyne-1-sulfonyl fluoride (2t)

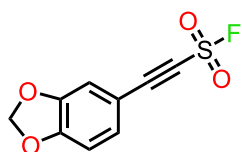

Following general procedure B, the title compound was isolated after purification by flash column chromatography (0-4% EtOAc in petroleum ether) as a brown solid (1.21 g, 60%). **m.p.** 82 - 84 °C; **<sup>1</sup>H NMR** (500 MHz, CDCl<sub>3</sub>) δ = 7.27 (dd, *J* = 8.1, 1.6 Hz, 1H), 7.05 (d, *J* = 1.6 Hz, 1H), 6.89 (d, *J* = 8.1 Hz, 1H), 6.10 (s, 2H); **<sup>13</sup>C NMR** (126 MHz, CDCl<sub>3</sub>) δ = 152.2, 148.2, 130.4, 112.5, 109.4, 108.7, 102.5, 96.5 (d, *J* = 8.1 Hz), 76.0 (d, *J* = 60.7 Hz); **<sup>19</sup>F**



**NMR** (376 MHz, CDCl<sub>3</sub>)  $\delta$  = 74.8; **HRMS** (ASAP): calculated for C<sub>9</sub>H<sub>6</sub>FO<sub>4</sub>S [M+H]: m/z = 228.9971, m/z found 228.9962; **IR**  $\nu_{\max}$  (ATR)/cm<sup>-1</sup>: 2928, 2181, 1614, 1477, 1417, 1256, 1201, 1035, 828, 775.

#### 2-(4'-isopropyl-[1,1'-biphenyl]-4-yl)ethyne-1-sulfonyl fluoride (2u)

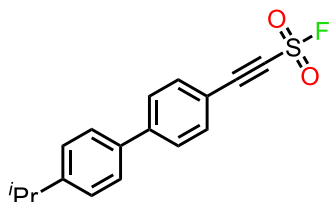

Following general procedure B, the title compound was isolated after purification by flash column chromatography (petroleum ether) as a yellow solid (1.40 g, 54%). **m.p.** 82 - 83 °C; **<sup>1</sup>H NMR** (500 MHz, CDCl<sub>3</sub>)  $\delta$  = 7.74 (appt. d, *J* = 8.6 Hz, 2H), 7.70 (appt. d, *J* = 8.6 Hz, 2H), 7.55 (appt. d, *J* = 8.2 Hz, 2H), 7.31 (appt. d, *J* = 8.3 Hz, 2H), 2.69 – 2.64 (m, 2H), 1.75 – 1.66 (m, 2H), 0.99 (t, *J* = 7.3 Hz, 3H); **<sup>13</sup>C NMR** (126 MHz, CDCl<sub>3</sub>)  $\delta$  = 146.0, 143.9, 136.6, 134.1, 129.4, 127.5, 127.2, 114.1, 96.0 (d, *J* = 8.1 Hz), 77.7, 37.9, 24.6, 14.0; **<sup>19</sup>F NMR** (470 MHz, CDCl<sub>3</sub>)  $\delta$  = 74.9; **HRMS** (ASAP): calculated for C<sub>17</sub>H<sub>16</sub>FO<sub>2</sub>S [M+H]: m/z = 303.0855, m/z found 303.0854; **IR**  $\nu_{\max}$  (ATR)/cm<sup>-1</sup>: 2954, 2870, 2187, 1599, 1418, 1204, 878, 781.

#### 2-(4-isopropoxy-3-methoxyphenyl)ethyne-1-sulfonyl fluoride (2v)

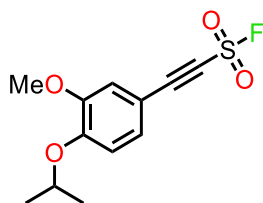

Following general procedure B, the title compound was isolated after purification by flash column chromatography (0-5% EtOAc in petroleum ether) as a yellow solid (1.95 g, 72%). **m.p.** 70 - 71 °C; **<sup>1</sup>H NMR** (500 MHz, CDCl<sub>3</sub>)  $\delta$  7.31 (dd, *J* = 8.4, 1.8 Hz, 1H), 7.10 (d, *J* = 1.8 Hz, 1H), 6.91 (d, *J* = 8.4 Hz, 1H), 4.67 (hept, *J* = 6.1 Hz, 1H), 3.89 (s, 3H), 1.43 (d, *J* = 6.1 Hz, 6H); **<sup>13</sup>C NMR** (126 MHz, CDCl<sub>3</sub>)  $\delta$  152.3, 150.1, 128.4, 115.8, 113.9, 106.9, 97.5 (d, *J* = 8.1 Hz), 76.2 (d, *J* = 60.5 Hz), 71.7, 56.3, 22.0; **<sup>19</sup>F NMR** (376 MHz, CDCl<sub>3</sub>)  $\delta$  74.8; **HRMS** (ASAP): calculated for C<sub>12</sub>H<sub>14</sub>FO<sub>4</sub>S [M+H]: m/z = 273.0597, m/z found 273.0595; **IR**  $\nu_{\max}$  (ATR)/cm<sup>-1</sup>: 3022, 2906, 2169, 1592, 1506, 1417, 1272, 1247, 1211, 1141, 1107, 947, 850, 500, 770.

## Synthesis and experimental data for compounds 4aa-4ax

### General procedure C

To a solution of the required SASF **2** (500  $\mu$ mol) and the required imidoyl chloride **9** (500  $\mu$ mol) in toluene (1.50 mL) was added Et<sub>3</sub>N (139  $\mu$ L, 1.00 mmol) and stirred at room temperature for 10 min. The reaction mixture was then extracted into EtOAc (10.0 mL) washed with brine (10.0 mL) and H<sub>2</sub>O (2 x 10.0 mL). The aqueous layer was extracted with EtOAc (10.0 mL), the organic fractions combined, dried over anhydrous MgSO<sub>4</sub>, filtered under vacuum and the solvent was removed under reduced pressure to obtain the analytically pure product.

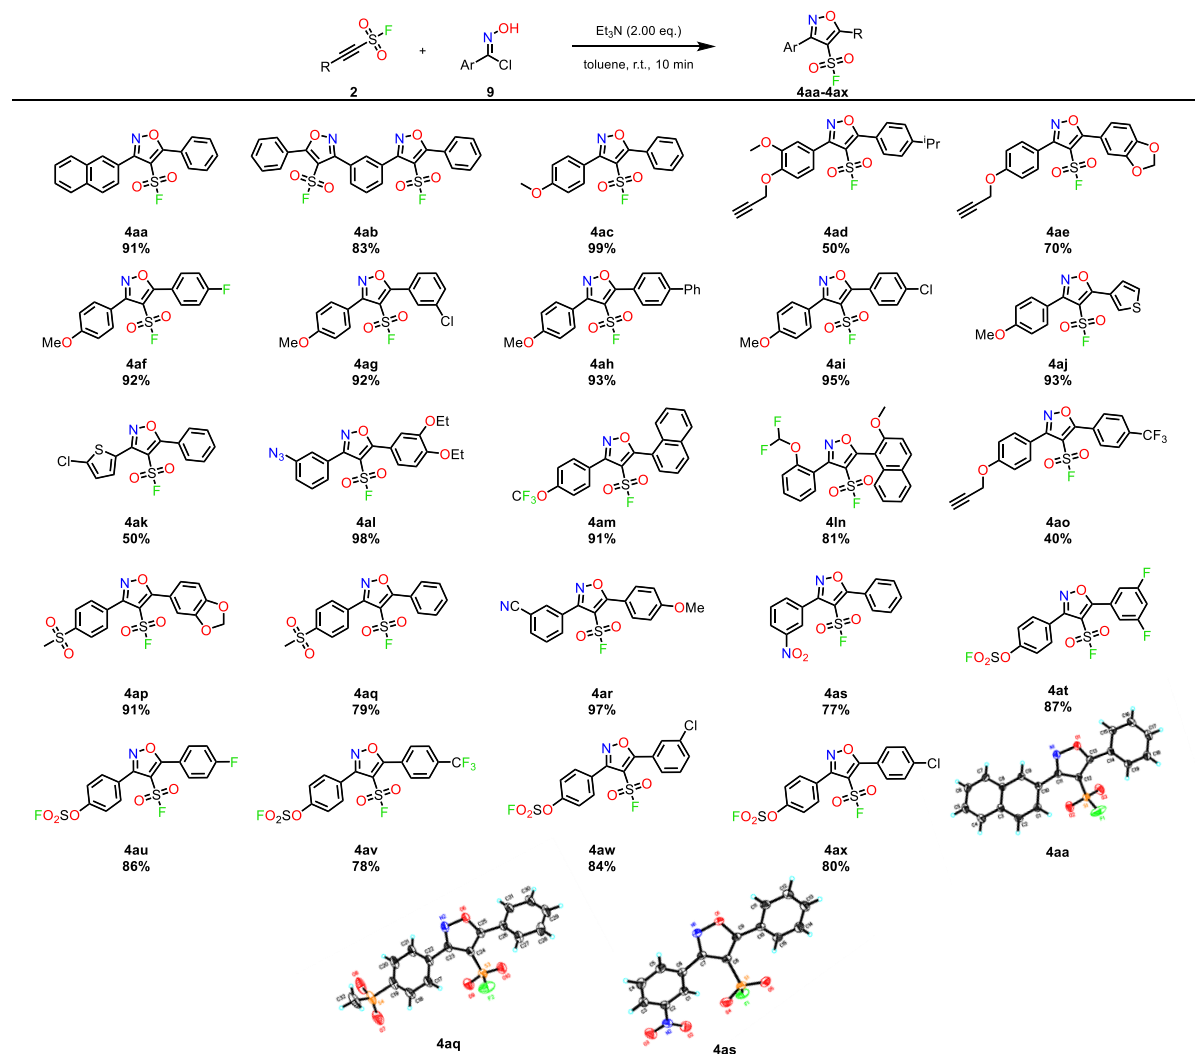

### 3-(Naphthalen-2-yl)-5-phenylisoxazole-4-sulfonyl fluoride (4aa)

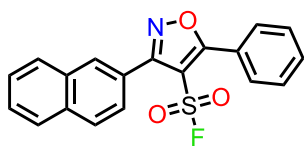

Following general procedure C, the title compound was isolated as a colourless solid (161 mg, 81%). **m.p.** 140 - 142 °C; **<sup>1</sup>H NMR** (400 MHz, CDCl<sub>3</sub>) δ 8.27 (s, 1H), 8.01 (d, *J* = 9.1 Hz, 1H), 8.00 – 7.90 (m, 4H), 7.79 (dd, *J* = 8.5, 1.8 Hz, 1H), 7.72 – 7.66 (m, 1H), 7.65 – 7.57 (m, 4H); **<sup>13</sup>C NMR** (101 MHz, CDCl<sub>3</sub>) δ 175.8 (d, *J* = 2.9 Hz), 161.9, 134.4, 133.2, 132.9, 129.9, 129.8, 129.1, 128.9, 128.7, 128.0, 127.9, 127.1, 125.7, 124.6, 123.2, 110.1 (d, *J* = 34.8 Hz); **<sup>19</sup>F NMR** (376 MHz, CDCl<sub>3</sub>) δ = 72.0; **HRMS** (ESI<sup>+</sup>): calculated for C<sub>19</sub>H<sub>12</sub>FNO<sub>3</sub>SNa [M+Na<sup>+</sup>]: *m/z* = 376.0414, *m/z* found 376.0415; **IR** *v*<sub>max</sub> (ATR)/cm<sup>-1</sup>: 2923, 2863, 1498, 1551, 1417, 1215, 1056, 751.

### 3-(3-(4-(Fluorosulfonyl)-5-phenylisoxazol-3-yl)phenyl)-5-phenylisoxazole-4-sulfonyl fluoride (4ab)

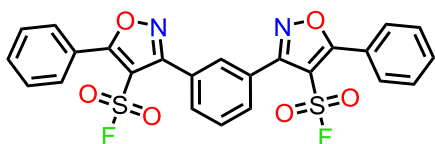

Following general procedure C (1.50 mL of toluene used, 250 μmol of the required imidoyl chloride), the title compound was isolated as a colourless solid (110 mg, 83%). **m.p.** 185 - 186 °C; **<sup>1</sup>H NMR** (500 MHz, CDCl<sub>3</sub>) δ 8.12 (appt. t, *J* = 1.5 Hz, 1H), 7.96 (dd, *J* = 7.8, 1.8 Hz, 2H), 7.93 – 7.88 (m, 4H), 7.74 (t, *J* = 7.8 Hz, 1H), 7.71 – 7.67 (m, 2H), 7.64 – 7.58 (m, 4H); **<sup>13</sup>C NMR** (126 MHz, CDCl<sub>3</sub>) δ = 176.0 (d, *J* = 2.9 Hz), 160.9, 133.3, 132.0, 130.2, 129.8, 129.4, 129.1, 126.8, 124.4, 110.0 (d, *J* = 35.2 Hz); **<sup>19</sup>F NMR** (376 MHz, CDCl<sub>3</sub>) δ = 72.4; **HRMS** (ESI<sup>+</sup>): calculated for C<sub>24</sub>H<sub>14</sub>F<sub>2</sub>N<sub>2</sub>O<sub>6</sub>S<sub>2</sub>Na [M+Na<sup>+</sup>]: *m/z* = 551.0154, *m/z* found 551.0143; **IR** *v*<sub>max</sub> (ATR)/cm<sup>-1</sup>: 3067, 1551, 1420, 1217, 771.

### 3-(4-Methoxyphenyl)-5-phenylisoxazole-4-sulfonyl fluoride (4ac)

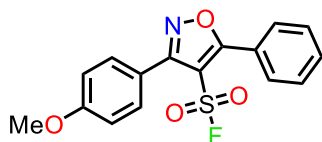

Following general procedure C (250 μmol of the required SASF and the required imidoyl chloride used), the title compound was isolated as a colourless solid (82.0 mg, 99%). **m.p.** 104 - 106; **<sup>1</sup>H NMR** (400 MHz, CDCl<sub>3</sub>) δ 7.89 – 7.84 (m, 2H), 7.72 – 7.64 (m, 3H), 7.62 – 7.56 (m, 2H), 7.06 (appt. d, *J* = 8.9 Hz, 2H), 3.90 (s, 3H); **<sup>13</sup>C NMR** (101 MHz, CDCl<sub>3</sub>) δ 175.8 (d, *J* = 3.1 Hz), 162.0, 161.4, 133.0, 130.9, 129.8, 129.0, 124.7, 118.0, 114.4, 109.8 (d, *J* = 34.5 Hz), 55.6; **<sup>19</sup>F NMR** (376 MHz, CDCl<sub>3</sub>) δ 72.0; **HRMS** (ASAP): calculated for C<sub>16</sub>H<sub>13</sub>FNO<sub>4</sub>S [M+H]: *m/z* =

334.0549, m/z found 334.0547; IR  $\nu_{\max}$  (ATR)/ $\text{cm}^{-1}$ : 2922, 2863, 1603, 1550, 1523, 1414, 1381, 1258, 1216, 1017, 833, 764.

#### 5-(4-Isopropylphenyl)-3-(3-methoxy-4-(prop-2-yn-1-yloxy)phenyl)isoxazole-4-sulfonyl fluoride (4ad)

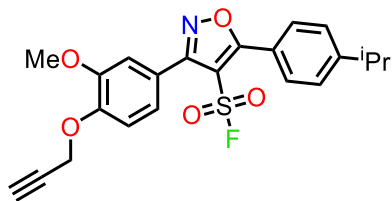

Following general procedure C, the title compound was isolated after purification by flash column chromatography (0-10% EtOAc in petroleum ether) as a colourless solid (108 mg, 50%). **m.p.** 103 - 104 °C;  **$^1\text{H}$  NMR** (500 MHz,  $\text{CDCl}_3$ )  $\delta$  = 7.80 (d,  $J$  = 8.4 Hz, 2H), 7.44 (d,  $J$  = 8.4 Hz, 2H), 7.35 (dd,  $J$  = 8.3, 2.1 Hz, 1H), 7.30 (d,  $J$  = 2.1 Hz, 1H), 7.18 (d,  $J$  = 8.3 Hz, 1H), 4.86 (d,  $J$  = 2.4 Hz, 2H), 3.96 (s, 3H), 3.03 (hept,  $J$  = 6.9 Hz, 1H), 2.57 (t,  $J$  = 2.4 Hz, 1H), 1.32 (d,  $J$  = 6.9 Hz, 6H);  **$^{13}\text{C}$  NMR** (126 MHz,  $\text{CDCl}_3$ )  $\delta$  = 176.0 (d,  $J$  = 3.0 Hz), 161.3, 154.7, 149.6, 149.3, 129.9, 127.2, 122.3, 122.0, 119.4, 113.7, 112.6, 109.2 (d,  $J$  = 34.5 Hz), 78.1, 76.5, 56.8, 56.2, 34.5, 23.8;  **$^{19}\text{F}$  NMR** (471 MHz,  $\text{CDCl}_3$ )  $\delta$  = 71.3; **HRMS** (ESI<sup>+</sup>): calculated for  $\text{C}_{22}\text{H}_{20}\text{FNO}_5\text{SNa}$  [ $\text{M}+\text{Na}^+$ ]: m/z = 452.0938, m/z found 452.0936; IR  $\nu_{\max}$  (ATR)/ $\text{cm}^{-1}$ : 3264, 2963, 2927, 2855, 1606, 1498, 1430, 1258, 1218, 1139, 1007, 754.

#### 5-(Benzo[d][1,3]dioxol-5-yl)-3-(4-(prop-2-yn-1-yloxy)phenyl)isoxazole-4-sulfonyl fluoride (4ae)

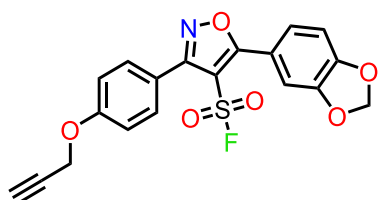

Following general procedure C, the title compound was isolated after purification by flash column chromatography (0-15% EtOAc in petroleum ether) as a colourless solid (140 mg, 70%). **m.p.** 154 - 156 °C;  **$^1\text{H}$  NMR** (500 MHz,  $\text{CDCl}_3$ )  $\delta$  = 7.68 (appt. d,  $J$  = 8.9 Hz, 2H), 7.46 (dd,  $J$  = 8.2, 1.8 Hz, 1H), 7.32 (d,  $J$  = 1.8 Hz, 1H), 7.13 (d,  $J$  = 8.9 Hz, 2H), 7.00 (d,  $J$  = 8.2 Hz, 1H), 6.13 (s, 2H), 4.78 (d,  $J$  = 2.4 Hz, 2H), 2.58 (t,  $J$  = 2.4 Hz, 1H);  **$^{13}\text{C}$  NMR** (126 MHz,  $\text{CDCl}_3$ )  $\delta$  = 175.2 (d,  $J$  = 2.7 Hz), 161.4, 159.9, 151.9, 148.4, 130.9, 125.7, 119.0, 118.0, 115.2, 109.5, 109.0, 108.7 (d,  $J$  = 34.5 Hz), 102.4, 78.1, 76.2, 56.0;  **$^{19}\text{F}$  NMR** (376 MHz,  $\text{CDCl}_3$ )  $\delta$  = 71.8; **HRMS** (ESI<sup>+</sup>): calculated for  $\text{C}_{19}\text{H}_{12}\text{FNO}_6\text{SNa}$  [ $\text{M}+\text{Na}^+$ ]: m/z = 424.0262, m/z found 424.0264; IR  $\nu_{\max}$  (ATR)/ $\text{cm}^{-1}$ : 3283, 2923, 2854, 2119, 1607, 1555, 1490, 1460, 1427, 1251, 1226, 1030, 759.

#### 5-(4-Fluorophenyl)-3-(4-methoxyphenyl)isoxazole-4-sulfonyl fluoride (4af)

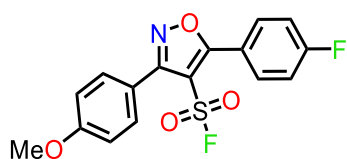

Following general procedure C (100  $\mu$ mol of the required SASF and the required imidoyl chloride used), the title compound was isolated as a white solid (32.0 mg, 92%). **m.p.** 121  $^{\circ}$ C;  **$^1$ H NMR** (400 MHz,  $\text{CDCl}_3$ )  $\delta$  7.97 – 7.83 (m, 2H), 7.67 (appt. d,  $J$  = 8.8 Hz, 2H), 7.36 – 7.23 (m, 2H), 7.04 (appt. d,  $J$  = 8.8 Hz, 2H), 3.89 (s, 3H);  **$^{13}$ C NMR** (151 MHz,  $\text{CDCl}_3$ )  $\delta$  174.7 (d,  $J$  = 3.0 Hz), 165.6 (d,  $J$  = 256.0 Hz), 162.0, 161.5, 132.3 (d,  $J$  = 9.3 Hz), 130.9, 120.9 (d,  $J$  = 3.4 Hz), 117.8, 116.5 (d,  $J$  = 22.3 Hz), 114.4, 109.7 (d,  $J$  = 34.6 Hz), 55.6;  **$^{19}$ F NMR** (376 MHz,  $\text{CDCl}_3$ )  $\delta$  71.3, -104.9; **HRMS** (APCI): calculated for  $\text{C}_{16}\text{H}_{12}\text{F}_2\text{NO}_4\text{S}$  [ $\text{M}+\text{H}^+$ ]:  $m/z$  = 352.0455,  $m/z$  found 352.0458

#### 5-(3-Chlorophenyl)-3-(4-methoxyphenyl)isoxazole-4-sulfonyl fluoride (4ag)

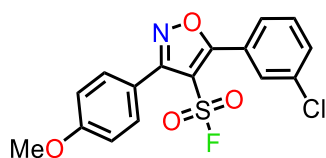

Following general procedure C (100  $\mu$ mol of the required SASF and the required imidoyl chloride used), the title compound was isolated as a pale yellow solid (34.0 mg, 92%). **m.p.** 127.8  $^{\circ}$ C;  **$^1$ H NMR** (400 MHz,  $\text{CDCl}_3$ )  $\delta$  7.83 (s, 1H), 7.74 (d,  $J$  = 7.8 Hz, 1H), 7.68 (appt. d,  $J$  = 8.2 Hz, 2H), 7.63 (d,  $J$  = 8.1 Hz, 1H), 7.53 (t,  $J$  = 7.8 Hz, 1H), 7.05 (appt. d,  $J$  = 8.2 Hz, 2H), 3.89 (s, 3H);  **$^{13}$ C NMR** (151 MHz,  $\text{CDCl}_3$ )  $\delta$  174.1 (d,  $J$  = 2.9 Hz), 162.1, 161.4, 135.2, 133.1, 130.9, 130.3, 129.6, 128.0, 126.2, 117.7, 114.5, 110.5 (d,  $J$  = 34.8 Hz), 55.6;  **$^{19}$ F NMR** (376 MHz,  $\text{CDCl}_3$ )  $\delta$  71.3; **HRMS** (APCI): calculated for  $\text{C}_{16}\text{H}_{12}\text{ClFNO}_4\text{S}$  [ $\text{M}+\text{H}^+$ ]:  $m/z$  = 368.0160,  $m/z$  found 368.0154

#### 5-([1,1'-Biphenyl]-4-yl)-3-(4-methoxyphenyl)isoxazole-4-sulfonyl fluoride (4ah)

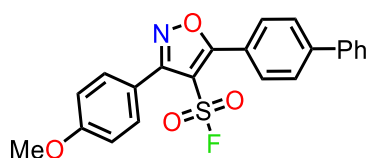

Following general procedure C (100  $\mu$ mol of the required SASF and the required imidoyl chloride used), the title compound was isolated as a white solid (38.0 mg, 93%). **m.p.** 173  $^{\circ}$ C;  **$^1$ H NMR** (400 MHz,  $\text{CDCl}_3$ )  $\delta$  7.95 (appt. d,  $J$  = 8.5 Hz, 2H), 7.80 (appt. d,  $J$  = 8.5 Hz, 2H), 7.73 – 7.63 (m, 4H), 7.55 – 7.46 (m, 2H), 7.48 – 7.39 (m, 1H), 7.05 (appt. d,  $J$  = 8.8 Hz, 2H), 3.89 (s, 3H);  **$^{13}$ C NMR** (151 MHz,  $\text{CDCl}_3$ )  $\delta$  175.5 (d,  $J$  = 2.8 Hz), 162.0, 161.5, 145.9, 139.6, 130.9, 130.3, 129.2, 128.7, 127.6, 127.4, 123.3, 118.0, 114.4, 109.5 (d,  $J$  = 34.5 Hz), 55.6;  **$^{19}$ F NMR** (376 MHz,  $\text{CDCl}_3$ )  $\delta$  71.2; **HRMS** (APCI): calculated for  $\text{C}_{22}\text{H}_{17}\text{FNO}_4\text{S}$  [ $\text{M}+\text{H}^+$ ]:  $m/z$  = 410.0862,  $m/z$  found 410.0862

### 5-(4-Chlorophenyl)-3-(4-methoxyphenyl)isoxazole-4-sulfonyl fluoride (4ai)

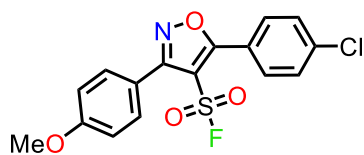

Following general procedure C (100  $\mu$ mol of the required SASF and the required imidoyl chloride used), the title compound was isolated as a pale yellow solid (35.0 mg, 95%). **m.p.** 105.5  $^{\circ}$ C;  **$^1$ H NMR** (400 MHz,  $\text{CDCl}_3$ )  $\delta$  7.80 (appt. d,  $J$  = 8.5 Hz, 2H), 7.67 (appt. d,  $J$  = 8.4 Hz, 2H), 7.57 (appt. d,  $J$  = 8.5 Hz, 2H), 7.04 (appt. d,  $J$  = 8.4 Hz, 2H), 3.89 (s, 3H);  **$^{13}$ C NMR** (151 MHz,  $\text{CDCl}_3$ )  $\delta$  174.6 (d,  $J$  = 3.0 Hz), 162.1, 161.5, 139.7, 131.1, 130.9, 129.5, 123.0, 117.8, 114.5, 110.0 (d,  $J$  = 34.8 Hz), 55.6;  **$^{19}$ F NMR** (376 MHz,  $\text{CDCl}_3$ )  $\delta$  71.3; **HRMS** (APCI): calculated for  $\text{C}_{16}\text{H}_{12}\text{ClFNO}_4\text{S}$  [ $\text{M}+\text{H}^+$ ]:  $m/z$  = 368.0160,  $m/z$  found 368.0166;

### 3-(4-Methoxyphenyl)-5-(thiophen-3-yl)isoxazole-4-sulfonyl fluoride (4aj)

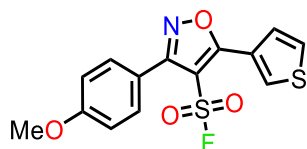

Following general procedure C (100  $\mu$ mol of the required SASF and the required imidoyl chloride used), the title compound was isolated as a yellow solid (31.5 mg, 93%). **m.p.** 93.7  $^{\circ}$ C;  **$^1$ H NMR** (400 MHz,  $\text{CDCl}_3$ )  $\delta$  8.34 (dd,  $J$  = 3.0, 1.3 Hz, 1H), 7.71 (dd,  $J$  = 5.2, 1.3 Hz, 1H), 7.63 (appt. d,  $J$  = 8.8 Hz, 2H), 7.51 (dd,  $J$  = 5.2, 3.0 Hz, 1H), 7.03 (appt. d,  $J$  = 8.9 Hz, 2H), 3.88 (s, 3H);  **$^{13}$ C NMR** (151 MHz,  $\text{CDCl}_3$ )  $\delta$  170.2 (d,  $J$  = 2.4 Hz), 161.9, 161.5, 132.5, 131.0, 127.6, 127.2, 125.0, 117.9, 114.3, 108.08 (d,  $J$  = 34.1 Hz), 55.5;  **$^{19}$ F NMR** (376 MHz,  $\text{CDCl}_3$ )  $\delta$  71.0; **HRMS** (APCI): calculated for  $\text{C}_{14}\text{H}_{11}\text{FNO}_4\text{S}_2$  [ $\text{M}+\text{H}^+$ ]:  $m/z$  = 340.0114,  $m/z$  found 340.0118;

### 3-(5-Chlorothiophen-2-yl)-5-phenylisoxazole-4-sulfonyl fluoride (4ak)

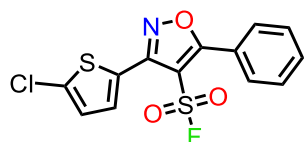

Following general procedure C, the title compound was isolated after purification by flash column chromatography (0-5% EtOAc in petroleum ether) as a yellow solid (134 mg, 77%). **m.p.** 94 - 96  $^{\circ}$ C;  **$^1$ H NMR** (400 MHz,  $\text{CDCl}_3$ )  $\delta$  7.83 - 7.78 (m, 2H), 7.70 - 7.65 (m, 1H), 7.63 (dd,  $J$  = 4.1, 0.6 Hz, 1H), 7.62 - 7.56 (m, 2H), 7.05 (d,  $J$  = 4.1 Hz, 1H);  **$^{13}$ C NMR** (101 MHz,  $\text{CDCl}_3$ )  $\delta$  176.6 (d,  $J$  = 3.6 Hz), 154.9, 135.3, 133.2, 131.4 (d,  $J$  = 1.7 Hz), 129.9, 129.0, 127.6, 124.2, 124.1, 108.9 (d,  $J$  = 35.7 Hz);  **$^{19}$ F NMR** (376 MHz,  $\text{CDCl}_3$ )  $\delta$  70.4; **HRMS** (ESI $^+$ ): calculated for  $\text{C}_{13}\text{H}_8\text{ClFNO}_3\text{S}_2$  [ $\text{M}+\text{H}^+$ ]:  $m/z$  = 343.9613,  $m/z$  found 343.9605; **IR**  $\nu$  max (ATR)/ $\text{cm}^{-1}$ : 3041, 2889, 2853, 1560, 1421, 1218, 1078, 1039, 770, 725.

### 3-(3-Azidophenyl)-5-(3,4-diethoxyphenyl)isoxazole-4-sulfonyl fluoride (4al)

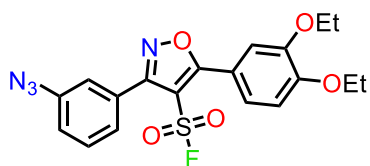

Following general procedure C, the title compound was isolated after purification by flash column chromatography (0-15% EtOAc in petroleum ether) as a beige solid (212 mg, 98%). **m.p.** 100 - 101 °C; **<sup>1</sup>H NMR** (500 MHz, CDCl<sub>3</sub>) δ = 7.57 – 7.49 (m, 2H), 7.47 – 7.44 (m, 1H), 7.43 (d, *J* = 2.2 Hz, 2H), 7.35 – 7.33 (m, 1H), 7.23 (ddd, *J* = 8.0, 2.3, 1.1 Hz, 1H), 7.03 (d, *J* = 8.5 Hz, 1H), 4.25 – 4.16 (m, 4H), 1.55 – 1.49 (m, 6H); **<sup>13</sup>C NMR** (126 MHz, CDCl<sub>3</sub>) δ = 175.4 (d, *J* = 2.5 Hz), 161.2, 153.3, 148.7, 140.9, 130.2, 127.9, 125.9, 123.9, 121.6, 120.0, 116.1, 113.8, 112.4, 108.2 (d, *J* = 34.5 Hz), 65.0, 64.8, 14.8, 14.7; **<sup>19</sup>F NMR** (376 MHz, CDCl<sub>3</sub>) δ = 72.1; **HRMS** (ESI<sup>+</sup>): calculated for C<sub>19</sub>H<sub>17</sub>FN<sub>4</sub>O<sub>5</sub>Na [M+Na<sup>+</sup>]: *m/z* = 455.0796, *m/z* found 455.0799; **IR** *v*<sub>max</sub> (ATR)/cm<sup>-1</sup>: 2987, 2933, 2892, 2099, 1599, 1517, 1420, 1272, 1209, 1136, 1039, 762.

### 5-(Naphthalen-1-yl)-3-(4-(trifluoromethoxy)phenyl)isoxazole-4-sulfonyl fluoride (4am)

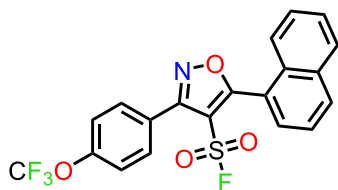

Following general procedure C (3.00 mL of toluene used), the title compound was isolated as a yellow solid (183 mg, 81%). **m.p.** 125 - 126 °C; **<sup>1</sup>H NMR** (500 MHz, CDCl<sub>3</sub>) δ = 8.17 – 8.14 (m, 1H), 8.02 – 7.98 (m, 1H), 7.94 – 7.90 (m, 2H), 7.81 – 7.76 (m, 2H), 7.68 – 7.62 (m, 3H), 7.46 – 7.42 (m, 2H); **<sup>13</sup>C NMR** (126 MHz, CDCl<sub>3</sub>) δ = 176.8 (d, *J* = 3.2 Hz), 160.0, 151.6 – 151.5 (m), 133.6, 133.3, 131.2, 130.6 – 130.2 (m), 130.1, 129.0, 128.3, 127.2, 124.9, 124.4, 124.3, 121.67, 121.2, 120.5 (q, *J* = 258.8 Hz), 112.9 (d, *J* = 35.0 Hz); **<sup>19</sup>F NMR** (376 MHz, CDCl<sub>3</sub>) δ = 71.8, -57.6; **HRMS** (ASAP): calculated for C<sub>20</sub>H<sub>12</sub>F<sub>4</sub>NO<sub>4</sub>S [M+H]: *m/z* = 438.0423, *m/z* found 438.0421; **IR** *v*<sub>max</sub> (ATR)/cm<sup>-1</sup>: 2967, 2937, 1601, 1559, 1431, 1254, 1217, 1159, 1055, 772.

### 3-(2-(Difluoromethoxy)phenyl)-5-(2-methoxynaphthalen-1-yl)isoxazole-4-sulfonyl fluoride (4an)

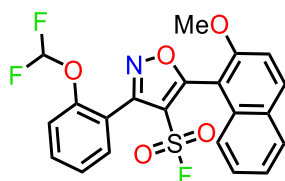

Following general procedure C (3.00 mL of toluene used), the title compound was isolated as a beige solid (200 mg, 91%). **m.p.** 90 - 91 °C; **<sup>1</sup>H NMR** (500 MHz, CDCl<sub>3</sub>) δ = 8.12 (d, *J* = 9.1 Hz, 1H), 7.89 (appt. d, *J* = 8.1 Hz, 1H), 7.70 (dd, *J* = 7.6, 1.7 Hz, 1H), 7.64 – 7.60 (m, 1H), 7.61 – 7.54 (m, 1H), 7.54 – 7.51 (m, 1H), 7.46 (ddd, *J* = 8.1, 6.6, 1.3 Hz, 1H), 7.42 (appt. td, *J* = 7.6, 1.1 Hz, 1H), 7.39 (d, *J* = 9.2 Hz, 1H), 7.38 – 7.33 (m, 1H), 6.59 (t, *J* = 73.3 Hz, 1H), 4.01 (s, 3H); **<sup>13</sup>C NMR** (126 MHz, CDCl<sub>3</sub>) δ = 173.6 (d, *J* = 2.4 Hz), 157.8, 156.9, 149.8 (t, *J* = 2.7 Hz), 135.0, 132.7, 132.7, 131.7, 128.8, 128.7, 128.6, 125.6, 124.7, 123.3, 119.0, 118.7, 116.2 (t, *J* = 260.9 Hz), 114.9 (d, *J* = 33.8 Hz), 112.4, 106.6, 56.4; **<sup>19</sup>F NMR** (376 MHz, CDCl<sub>3</sub>) δ = 67.2, -81.1 (t, *J* = 78.7 Hz); **HRMS** (ESI<sup>+</sup>): calculated for C<sub>21</sub>H<sub>14</sub>F<sub>3</sub>NO<sub>5</sub>Na [M+Na<sup>+</sup>]: *m/z* = 472.0437, *m/z* found 472.0437; **IR** *v*<sub>max</sub> (ATR)/cm<sup>-1</sup>: 2926, 2852, 15993, 1558, 1509, 1456, 1415, 1267, 1127, 1052, 779.

### 3-(4-(Prop-2-yn-1-yloxy)phenyl)-5-(4-(trifluoromethyl)phenyl)isoxazole-4-sulfonyl fluoride (4ao)

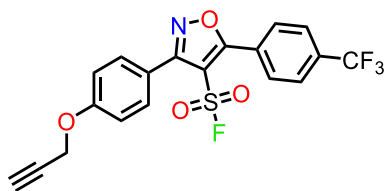

Following general procedure C (100 μmol of the required SASF and the required imidoyl chloride used), the title compound was isolated after purification by flash column chromatography (0-15% EtOAc in petroleum ether) as a colourless solid (17.0 mg, 40%). **m.p.** 124 – 125 °C; **<sup>1</sup>H NMR** (500 MHz, CDCl<sub>3</sub>) δ 7.99 (d, *J* = 8.2 Hz, 2H), 7.87 (d, *J* = 8.2 Hz, 2H), 7.72 (appt. d, *J* = 8.9 Hz, 2H), 7.15 (appt. d, *J* = 8.9 Hz, 2H), 4.79 (d, *J* = 2.4 Hz, 2H), 2.59 (t, *J* = 2.4 Hz, 1H); **<sup>13</sup>C NMR** (126 MHz, CDCl<sub>3</sub>) δ 174.1 (d, *J* = 3.1 Hz), 161.4, 160.1, 134.6 (q, *J* = 33.2 Hz), 130.9, 130.3, 127.9, 126.1 (q, *J* = 3.7 Hz), 123.5 (q, *J* = 272.9 Hz), 118.5, 115.4, 111.0 (d, *J* = 35.1 Hz), 78.0, 76.3, 56.1; **<sup>19</sup>F NMR** (376 MHz, CDCl<sub>3</sub>) δ 71.9, -63.3; **HRMS** (ESI<sup>+</sup>): calculated for C<sub>19</sub>H<sub>11</sub>F<sub>4</sub>NO<sub>4</sub>Na [M+Na<sup>+</sup>]: *m/z* = 448.0237, *m/z* found 448.0239; **IR** *v*<sub>max</sub> (ATR)/cm<sup>-1</sup>: 3280, 2898, 2133, 1608, 1564, 1432, 1320, 1244, 1223, 1181, 1140, 1069, 1021, 837, 770.

### 5-(Benzo[d][1,3]dioxol-5-yl)-3-(4-(methylsulfonyl)phenyl)isoxazole-4-sulfonyl fluoride (4p)

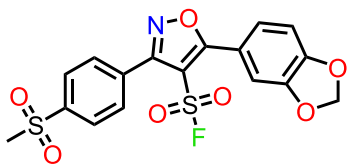

Following general procedure C, the title compound was isolated after washing with Et<sub>2</sub>O as a yellow solid (193 mg, 91%). **m.p.** 180 °C (decomposition); **<sup>1</sup>H NMR** (500 MHz, CDCl<sub>3</sub>) δ = 8.12 (appt. d, *J* = 8.7 Hz, 2H), 7.91 (appt. d, *J* = 8.7 Hz, 2H), 7.50 (dd, *J* = 8.2, 1.8 Hz, 1H), 7.35 (d, *J* = 1.8 Hz, 1H), 7.02 (d, *J* = 8.2 Hz, 1H), 6.15 (s, 2H), 3.14 (s, 3H); **<sup>13</sup>C NMR** (126 MHz, CDCl<sub>3</sub>) δ = 175.6 (d, *J* = 2.4 Hz), 160.6, 152.3, 148.5, 143.0, 131.5, 130.6, 127.9, 125.9,



117.4, 109.4, 109.1, 108.7 (d,  $J = 35.2$  Hz), 102.5, 44.6;  $^{19}\text{F}$  NMR (376 MHz,  $\text{CDCl}_3$ )  $\delta = 72.8$ ; HRMS (ESI $^+$ ): calculated for  $\text{C}_{17}\text{H}_{12}\text{FNO}_7\text{S}_2\text{Na}$  [ $\text{M}+\text{Na}^+$ ]:  $m/z = 447.9931$ ,  $m/z$  found 447.9936; IR  $\nu_{\text{max}}$  (ATR)/ $\text{cm}^{-1}$ : 3015, 2359, 1556, 1486, 1420, 1311, 1264, 1244, 1214, 1149, 1034, 779.

### 3-(4-(Methylsulfonyl)phenyl)-5-phenylisoxazole-4-sulfonyl fluoride (4aq)

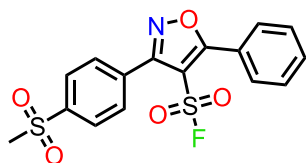

Following general procedure C, the title compound was isolated after washing with  $\text{Et}_2\text{O}$  as a yellow solid (151 mg, 79%). **m.p.** 139 - 141  $^\circ\text{C}$ ;  $^1\text{H}$  NMR (500 MHz,  $\text{CDCl}_3$ )  $\delta = 8.14$  (appt. d,  $J = 8.7$  Hz, 2H), 7.95 (appt. d,  $J = 8.7$  Hz, 2H), 7.92 - 7.89 (m, 2H), 7.73 - 7.68 (m, 1H), 7.65 - 7.60 (m, 2H), 3.14 (s, 4H);  $^{13}\text{C}$  NMR (126 MHz,  $\text{CDCl}_3$ )  $\delta = 176.2$  (d,  $J = 2.8$  Hz), 160.4, 143.0, 133.5, 131.4, 130.6, 129.8, 129.2, 127.9, 124.0, 109.9 (d,  $J = 35.4$  Hz), 44.6;  $^{19}\text{F}$  NMR (376 MHz,  $\text{CDCl}_3$ )  $\delta = 72.9$ ; HRMS (ESI $^+$ ): calculated for  $\text{C}_{16}\text{H}_{12}\text{FNO}_5\text{S}_2\text{Na}$  [ $\text{M}+\text{Na}^+$ ]:  $m/z = 404.0033$ ,  $m/z$  found 404.0031; IR  $\nu_{\text{max}}$  (ATR)/ $\text{cm}^{-1}$ : 3074, 1606, 1557, 1424, 1306, 1219, 1146, 778.

### 3-(3-Cyanophenyl)-5-(4-methoxyphenyl)isoxazole-4-sulfonyl fluoride (4ar)

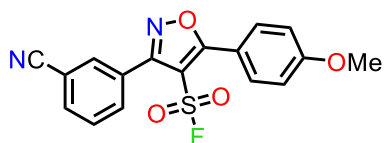

Following general procedure C, the title compound was isolated as a yellow solid (174 mg, 97%)  $^1\text{H}$  NMR (400 MHz,  $\text{CDCl}_3$ )  $\delta = 7.99$  (appt. td,  $J = 1.7, 0.6$  Hz, 1H), 7.94 (ddd,  $J = 7.9, 1.8, 1.2$  Hz, 1H), 7.90 (appt. d,  $J = 9.1$  Hz, 2H), 7.87 (ddd,  $J = 7.8, 1.6, 1.2$  Hz, 1H), 7.68 (appt. td,  $J = 7.9, 0.6$  Hz, 1H), 7.10 (appt. d,  $J = 9.0$  Hz, 2H), 3.93 (s, 3H);  $^{13}\text{C}$  NMR (126 MHz,  $\text{CDCl}_3$ )  $\delta = 175.8$  (d,  $J = 2.5$  Hz), 163.8, 160.1, 134.4, 133.7, 132.8, 131.7, 129.7, 127.7, 117.9, 116.0, 114.7, 113.3, 108.0 (d,  $J = 35.0$  Hz), 55.7;  $^{19}\text{F}$  NMR (376 MHz,  $\text{CDCl}_3$ )  $\delta = 72.9$ ; HRMS (ESI $^+$ ): calculated for  $\text{C}_{17}\text{H}_{11}\text{FN}_2\text{O}_4\text{SNa}$  [ $\text{M}+\text{Na}^+$ ]:  $m/z = 381.0316$ ,  $m/z$  found 381.0322; IR  $\nu_{\text{max}}$  (ATR)/ $\text{cm}^{-1}$ : 2961, 2928, 2232, 1713, 1604, 1511, 1415, 1259, 1178, 1021, 803.

### 3-(3-Nitrophenyl)-5-phenylisoxazole-4-sulfonyl fluoride (4as)

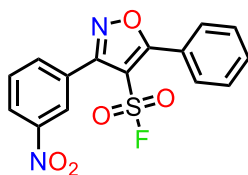

Following general procedure C, the title compound was isolated after purification by flash column chromatography (0-2% EtOAc in petroleum ether) as a beige solid (86.0 mg, 50%). **m.p.** 140 - 141 °C; **<sup>1</sup>H NMR** (400 MHz, CDCl<sub>3</sub>) δ 8.64 – 8.61 (m, 1H), 8.46 (ddd, *J* = 8.3, 2.3, 1.1 Hz, 1H), 8.06 (ddd, *J* = 7.7, 1.7, 1.1 Hz, 1H), 7.94 – 7.88 (m, 2H), 7.80 – 7.74 (m, 1H), 7.73 – 7.68 (m, 1H), 7.65 – 7.60 (m, 2H); **<sup>13</sup>C NMR** (101 MHz, CDCl<sub>3</sub>) δ 176.3 (d, *J* = 2.7 Hz), 160.1, 148.4, 135.3, 133.6, 130.1, 129.8, 129.2, 127.7, 125.9, 124.7, 124.0, 109.8 (d, *J* = 35.5 Hz); **<sup>19</sup>F NMR** (376 MHz, CDCl<sub>3</sub>) δ 73.2; **HRMS** (ESI<sup>+</sup>): calculated for C<sub>15</sub>H<sub>9</sub>FN<sub>2</sub>O<sub>5</sub>SNa [M+Na<sup>+</sup>]: *m/z* = 371.0108, *m/z* found 371.0100; **IR**  $\nu_{\max}$  (ATR)/cm<sup>-1</sup>: 2922, 2857, 1600, 1531, 1420, 1348, 1215, 1058, 767, 721.

#### 4-(5-(3,5-Difluorophenyl)-4-(fluorosulfonyl)isoxazol-3-yl)phenyl fluorosulfate (4at)

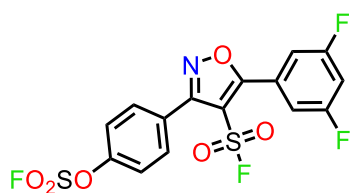

Following general procedure C (100 μmol of the required SASF and the required imidoyl chloride used), the title compound was isolated as a white solid (38.0 mg, 87%). **m.p.** 138.7 °C; **<sup>1</sup>H NMR** (400 MHz, CDCl<sub>3</sub>) δ 7.85 (appt. d, *J* = 8.5 Hz, 2H), 7.55 (appt. d, *J* = 8.5 Hz, 2H), 7.49 – 7.35 (m, 2H), 7.15 (td, *J* = 8.7, 2.4 Hz, 1H); **<sup>13</sup>C NMR** (151 MHz, CDCl<sub>3</sub>) δ 173.2 (d, *J* = 3.1 Hz), 163.0 (dd, *J* = 252.3, 12.4 Hz), 160.4, 151.9, 131.9, 126.5 (t, *J* = 10.5 Hz), 126.1, 121.7, 113.3 (dd, *J* = 22.0, 6.7 Hz), 111.2 (d, *J* = 35.8 Hz), 109.0 (t, *J* = 24.9 Hz); **<sup>19</sup>F NMR** (376 MHz, CDCl<sub>3</sub>) δ 72.3, 38.3, -106.6; **HRMS** (APCI): calculated for C<sub>15</sub>H<sub>8</sub>F<sub>4</sub>NO<sub>6</sub>S<sub>2</sub> [M+H<sup>+</sup>]: *m/z* = 437.9729, *m/z* found 437.9727;

#### 4-(5-(4-Fluorophenyl)-4-(fluorosulfonyl)isoxazol-3-yl)phenyl fluorosulfate (4au)

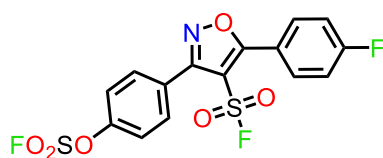

Following general procedure C (100 μmol of the required SASF and the required imidoyl chloride used), the title compound was isolated as a white solid (36.0 mg, 86%). **m.p.** 123.4 °C; **<sup>1</sup>H NMR** (400 MHz, CDCl<sub>3</sub>) δ 7.92 (dd, *J* = 8.5, 5.1 Hz, 2H), 7.85 (appt. d, *J* = 8.3 Hz, 2H), 7.54 (appt. d, *J* = 8.3 Hz, 2H), 7.30 (t, *J* = 8.3 Hz, 2H); **<sup>13</sup>C NMR** (151 MHz, CDCl<sub>3</sub>) δ 175.1 (d, *J* = 2.7 Hz), 165.8 (d, *J* = 256.8 Hz), 160.3, 151.8, 132.4 (d, *J* = 9.3 Hz), 131.8, 126.6, 121.6, 120.3 (d, *J* = 3.4 Hz), 116.8 (d, *J* = 22.4 Hz), 109.8 (d, *J* = 35.6 Hz); **<sup>19</sup>F NMR** (376 MHz, CDCl<sub>3</sub>) δ 72.2, 38.2, -104.0; **HRMS** (APCI): calculated for C<sub>15</sub>H<sub>9</sub>F<sub>3</sub>NO<sub>6</sub>S<sub>2</sub> [M+H<sup>+</sup>]: *m/z* = 419.9823, *m/z* found 419.9824;

#### 4-(4-(Fluorosulfonyl)-5-(4-(trifluoromethyl)phenyl)isoxazol-3-yl)phenyl fluorosulfate (4av)

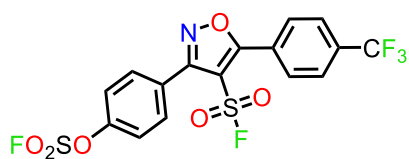

Following general procedure C (100  $\mu$ mol of the required SASF and the required imidoyl chloride used), the title compound was isolated as a white solid (36.5 mg, 78%). **m.p.** 134.4  $^{\circ}$ C;  $^1\text{H NMR}$  (400 MHz,  $\text{CDCl}_3$ )  $\delta$  8.01 (appt. d,  $J = 8.1$  Hz, 2H), 7.93 – 7.75 (m, 4H), 7.55 (appt. d,  $J = 8.3$  Hz, 2H);  $^{13}\text{C NMR}$  (151 MHz,  $\text{CDCl}_3$ )  $\delta$  174.5 (d,  $J = 2.8$  Hz), 160.3, 151.9, 135.0 (q,  $J = 33.3$  Hz), 131.8, 130.4, 127.4, 126.2, 126.2 (q,  $J = 3.8$  Hz), 123.4 (q,  $J = 273.0$  Hz), 121.7, 111.1 (d,  $J = 35.7$  Hz);  $^{19}\text{F NMR}$  (376 MHz,  $\text{CDCl}_3$ )  $\delta$  72.3, 38.3, -63.8; **HRMS** (APCI): calculated for  $\text{C}_{16}\text{H}_9\text{F}_5\text{NO}_6\text{S}_2$  [ $\text{M}+\text{H}^+$ ]:  $m/z = 469.9791$ ,  $m/z$  found 469.9780;

#### 4-(5-(3-Chlorophenyl)-4-(fluorosulfonyl)isoxazol-3-yl)phenyl fluorosulfate (4aw)

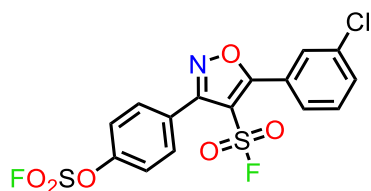

Following general procedure C (100  $\mu$ mol of the required SASF and the required imidoyl chloride used), the title compound was isolated as a white solid (36.0 mg, 84%). **m.p.** 120.0  $^{\circ}$ C;  $^1\text{H NMR}$  (400 MHz,  $\text{CDCl}_3$ )  $\delta$  7.94 – 7.81 (m, 3H), 7.77 (d,  $J = 7.9$  Hz, 1H), 7.66 (d,  $J = 8.2$  Hz, 1H), 7.60 – 7.51 (m, 3H);  $^{13}\text{C NMR}$  (151 MHz,  $\text{CDCl}_3$ )  $\delta$  174.6 (d,  $J = 2.8$  Hz), 160.3, 151.9, 135.4, 133.5, 131.8, 130.5, 129.7, 128.0, 126.4, 125.7, 121.7, 110.6 (d,  $J = 35.4$  Hz);  $^{19}\text{F NMR}$  (376 MHz,  $\text{CDCl}_3$ )  $\delta$  72.3, 38.2; **HRMS** (APCI): calculated for  $\text{C}_{15}\text{H}_9\text{ClF}_2\text{NO}_6\text{S}_2$  [ $\text{M}+\text{H}^+$ ]:  $m/z = 435.9528$ ,  $m/z$  found 435.9536;

#### 4-(5-(4-Chlorophenyl)-4-(fluorosulfonyl)isoxazol-3-yl)phenyl fluorosulfate (4ax)

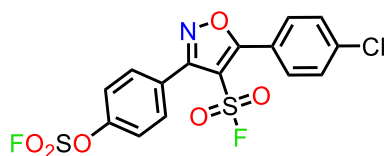

Following general procedure C (100  $\mu$ mol of the required SASF and the required imidoyl chloride used), the title compound was isolated as a white solid (35.0 mg, 80%). **m.p.** 96.3  $^{\circ}$ C;  $^1\text{H NMR}$  (400 MHz,  $\text{CDCl}_3$ )  $\delta$  7.92 – 7.74 (m, 4H), 7.59 (appt. d,  $J = 8.0$  Hz, 2H), 7.54 (appt. d,  $J = 8.4$  Hz, 2H);  $^{13}\text{C NMR}$  (151 MHz,  $\text{CDCl}_3$ )  $\delta$  175.0 (d,  $J = 2.6$  Hz), 160.4, 151.9, 140.3, 131.8, 131.1, 130.0, 129.7, 126.5, 122.5, 121.6, 110.2;  $^{19}\text{F NMR}$  (376 MHz,  $\text{CDCl}_3$ )  $\delta$  72.23, 38.20; **HRMS** (APCI): calculated for  $\text{C}_{15}\text{H}_9\text{ClF}_2\text{NO}_6\text{S}_2$  [ $\text{M}+\text{H}^+$ ]:  $m/z = 435.9528$ ,  $m/z$  found 435.9524;

## Synthesis and experimental data for compounds 4ba-4aj

### General Procedure D

A solution of the required SASF **2** (100  $\mu\text{mol}$ ) and the required nitron **3b** (100  $\mu\text{mol}$ ) was stirred in  $\text{CH}_2\text{Cl}_2$  (500  $\mu\text{L}$ ) at room temperature for 0.5 h and the solvent was then removed under reduced pressure to obtain the analytically pure product.

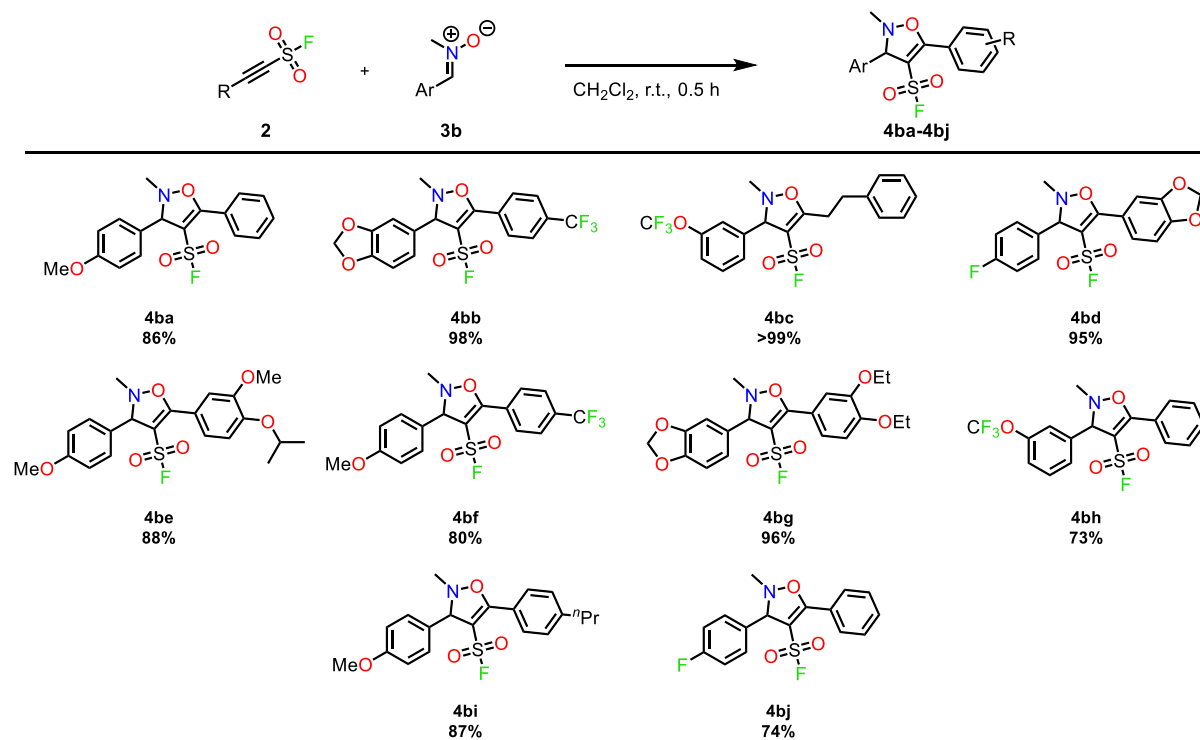

### 3-(4-Methoxyphenyl)-2-methyl-5-phenyl-2,3-dihydroisoxazole-4-sulfonyl fluoride (**4ba**)

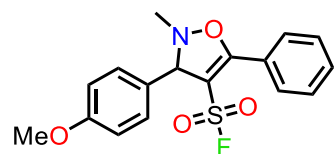

Following general procedure D, the title compound was isolated as a colourless oil (30.0 mg, 86%).  $^1\text{H NMR}$  (400 MHz,  $\text{CDCl}_3$ )  $\delta$  7.76 (appt. d,  $J = 8.5$  Hz, 1H), 7.60 (appt. t,  $J = 7.5$  Hz, 1H), 7.50 (appt. t,  $J = 7.6$  Hz, 1H), 7.37 (appt. d,  $J = 8.7$  Hz, 1H), 6.94 (d,  $J = 8.7$  Hz, 1H), 5.19 (s, 1H), 3.82 (s, 2H), 3.10 (s, 2H);  $^{13}\text{C NMR}$  (101 MHz,  $\text{CDCl}_3$ )  $\delta$  165.8 (d,  $J = 2.3$  Hz), 160.1, 133.0, 130.6, 129.9, 128.6, 128.4, 124.5, 114.4, 102.9 (d,  $J = 29.9$  Hz), 76.3, 55.3, 46.8.  $^{19}\text{F NMR}$  (376 MHz,  $\text{CDCl}_3$ )  $\delta$  73.3; **HRMS** (ASAP): calculated for  $\text{C}_{17}\text{H}_{17}\text{FNO}_4\text{S}$  [ $\text{M}+\text{H}^+$ ]:  $m/z = 350.0862$ ,  $m/z$  found 350.0861; **IR**  $\nu_{\text{max}}$  (ATR)/ $\text{cm}^{-1}$ : 3066, 2840, 1678, 1597, 761.

**3-(Benzo[d][1,3]dioxol-5-yl)-2-methyl-5-(4-(trifluoromethyl)phenyl)-2,3-dihydroisoxazole-4-sulfonyl fluoride (4bb)**

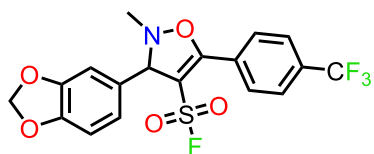

Following general procedure D, the title compound was isolated as a yellow solid (42.0 mg, 98%). **m.p.** 105 - 107 °C; **<sup>1</sup>H NMR** (500 MHz, CDCl<sub>3</sub>) δ 7.87 (appt. d, *J* = 8.2 Hz, 2H), 7.77 (appt. d, *J* = 8.2 Hz, 2H), 6.94 (d, *J* = 1.7 Hz, 1H), 6.91 (dd, *J* = 8.0, 1.7 Hz, 1H), 6.84 (d, *J* = 8.0 Hz, 1H), 6.00 (appt. q, *J* = 2.5 Hz, 2H), 5.19 (s, 1H), 3.12 (s, 3H); **<sup>13</sup>C NMR** (126 MHz, CDCl<sub>3</sub>) δ 164.2, 148.5 (d, *J* = 3.0 Hz), 134.6 (q, *J* = 33.1 Hz), 131.9, 130.5, 128.1, 125.7 (q, *J* = 3.7 Hz), 123.5 (q, *J* = 272.8 Hz), 121.2, 108.7, 107.5, 104.8 (d, *J* = 30.5 Hz), 101.6, 76.8, 47.0; **<sup>19</sup>F NMR** (376 MHz, CDCl<sub>3</sub>) δ 73.0, -63.3; **HRMS** (ESI<sup>+</sup>): calculated for C<sub>18</sub>H<sub>14</sub>F<sub>4</sub>NO<sub>5</sub>S [M+H<sup>+</sup>]: *m/z* = 432.0523, *m/z* found 435.0525; **IR** *v*<sub>max</sub> (ATR)/cm<sup>-1</sup>: 2966, 2892, 1687, 1632, 1607, 1490, 1449, 1406, 1320, 1247, 1211, 1172, 1125, 1063, 1038, 743.

**2-Methyl-5-phenethyl-3-(3-(trifluoromethoxy)phenyl)-2,3-dihydroisoxazole-4-sulfonyl fluoride (4bc)**

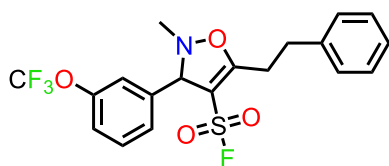

Following general procedure D, the title compound was isolated as a yellow oil (43.0 mg, >99%). **<sup>1</sup>H NMR** (400 MHz, CDCl<sub>3</sub>) δ 7.40 – 7.31 (m, 3H), 7.29 – 7.23 (m, 3H), 7.23 – 7.18 (m, 1H), 7.18 – 7.14 (m, 2H), 4.98 (s, 1H), 3.17 – 2.97 (m, 4H), 2.92 (s, 3H); **<sup>13</sup>C NMR** (101 MHz, CDCl<sub>3</sub>) δ 170.7 (d, *J* = 2.8 Hz), 149.6 (q, *J* = 1.8 Hz), 140.7, 138.7, 130.3, 128.8, 128.7, 127.1, 125.8, 121.3, 120.6 (q, *J* = 257.5 Hz), 120.1, 103.5 (d, *J* = 29.6 Hz), 75.1, 47.4, 32.6, 27.7; **<sup>19</sup>F NMR** (376 MHz, CDCl<sub>3</sub>) δ 71.3, -57.8; **HRMS** (ESI<sup>+</sup>): calculated for C<sub>19</sub>H<sub>17</sub>F<sub>4</sub>NO<sub>4</sub>SNa [M+Na<sup>+</sup>]: *m/z* = 454.0707, *m/z* found 454.0708; **IR** *v*<sub>max</sub> (ATR)/cm<sup>-1</sup>: 3031, 2963, 1736, 1621, 1404, 1256, 1207, 1161, 789, 757.

**5-(Benzo[d][1,3]dioxol-5-yl)-3-(4-fluorophenyl)-2-methyl-2,3-dihydroisoxazole-4-sulfonyl fluoride (4bd)**

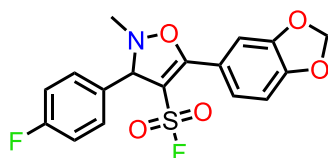

Following general procedure D, the title compound was isolated as a yellow solid (36.0 mg, 95%). **m.p.** 92 - 93 °C; **<sup>1</sup>H NMR** (500 MHz, CDCl<sub>3</sub>) δ 7.44 – 7.40 (m, 2H), 7.37 (dd, *J* = 8.2, 1.8 Hz, 1H), 7.21 (d, *J* = 1.8 Hz, 1H), 7.12 – 7.07 (m, 2H), 6.92 (d, *J* = 8.2 Hz, 1H), 6.08 (s, 2H), 5.19 (s, 1H), 3.10 (s, 3H); **<sup>13</sup>C NMR** (126 MHz, CDCl<sub>3</sub>) δ 165.6 (d, *J* =

1.9 Hz), 163.1 (d,  $J = 247.7$  Hz), 152.1, 148.1, 134.9, 128.9 (d,  $J = 8.4$  Hz), 126.3, 117.7, 116.1 (d,  $J = 21.7$  Hz), 110.0, 108.7, 102.3, 101.3 (d,  $J = 30.4$  Hz), 76.0, 47.0;  $^{19}\text{F NMR}$  (376 MHz,  $\text{CDCl}_3$ )  $\delta$  73.9, -112.9; **HRMS** (ESI<sup>+</sup>): calculated for  $\text{C}_{17}\text{H}_{14}\text{F}_2\text{NO}_5\text{S}$  [ $\text{M}+\text{H}^+$ ]:  $m/z = 382.0555$ ,  $m/z$  found 382.0557; **IR**  $\nu_{\text{max}}$  (ATR)/ $\text{cm}^{-1}$ : 2960, 2922, 2857, 1629, 1604, 1505, 1486, 1451, 1413, 1256, 1211, 1095, 1031, 791, 732.

**5-(4-isopropoxy-3-methoxyphenyl)-3-(4-methoxyphenyl)-2-methyl-2,3-dihydroisoxazole-4-sulfonyl fluoride (4be)**

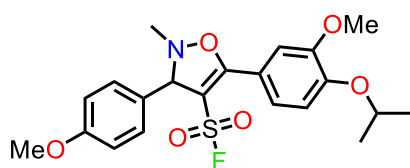

Following general procedure D, the title compound was isolated as a yellow oil (37.0 mg, 84%).  $^1\text{H NMR}$  (500 MHz,  $\text{CDCl}_3$ )  $\delta$  7.43 (appt. dd,  $J = 8.5, 2.1$  Hz, 1H), 7.35 (appt. d,  $J = 8.7$  Hz, 1H), 7.32 (appt. d,  $J = 2.1$  Hz, 1H), 6.99 – 6.87 (m, 1H), 5.17 (s, 1H), 4.67 (hept,  $J = 6.1$  Hz, 1H), 3.90 (s, 1H), 3.81 (s, 1H), 3.07 (s, 1H), 1.42 (d,  $J = 6.1$  Hz, 1H);  $^{13}\text{C NMR}$  (126 MHz,  $\text{CDCl}_3$ )  $\delta$  165.5, 160.1, 152.0, 149.7, 128.4, 124.3, 116.2, 114.4, 113.4, 113.4, 100.7 (d,  $J = 29.6$  Hz), 76.4, 71.5, 56.3, 55.4, 22.1, 22.0;  $^{19}\text{F NMR}$  (376 MHz,  $\text{CDCl}_3$ )  $\delta$  73.7; **HRMS** (ESI<sup>+</sup>): calculated for  $\text{C}_{21}\text{H}_{25}\text{FNO}_6\text{S}$  [ $\text{M}+\text{H}^+$ ]:  $m/z = 438.1381$ ,  $m/z$  found 438.1391; **IR**  $\nu_{\text{max}}$  (ATR)/ $\text{cm}^{-1}$ : 2977, 2933, 2838, 1599, 1505, 740.

**3-(4-Methoxyphenyl)-2-methyl-5-(4-(trifluoromethyl)phenyl)-2,3-dihydroisoxazole-4-sulfonyl fluoride (4bf)**

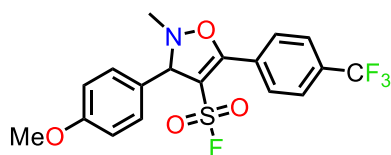

Following general procedure D, the title compound was isolated after purification by flash column chromatography (0-15% EtOAc in petroleum ether) as a yellow amorphous solid (33.0 mg, 80%).  $^1\text{H NMR}$  (400 MHz,  $\text{CDCl}_3$ )  $\delta$  7.88 (appt. d,  $J = 8.2$  Hz, 2H), 7.77 (appt. d,  $J = 8.2$  Hz, 2H), 7.37 (appt. d,  $J = 8.5$  Hz, 2H), 6.96 (appt. d,  $J = 8.6$  Hz, 2H), 5.23 (s, 1H), 3.84 (s, 3H), 3.12 (s, 3H);  $^{13}\text{C NMR}$  (101 MHz,  $\text{CDCl}_3$ )  $\delta$  164.1, 160.4, 134.5 (q,  $J = 33.0$  Hz), 130.5, 130.1, 128.7, 128.2, 125.7 (q,  $J = 3.7$  Hz), 123.5 (q,  $J = 272.9$  Hz), 114.6, 104.9 (d,  $J = 30.3$  Hz), 76.6, 55.5, 47.0;  $^{19}\text{F NMR}$  (376 MHz,  $\text{CDCl}_3$ )  $\delta$  72.9, -63.3; **HRMS** (ASAP): calculated for  $\text{C}_{18}\text{H}_{16}\text{F}_4\text{NO}_4\text{S}$  [ $\text{M}+\text{H}^+$ ]:  $m/z = 418.0736$ ,  $m/z$  found 418.0732; **IR**  $\nu_{\text{max}}$  (ATR)/ $\text{cm}^{-1}$ : 2924, 2841, 1606, 1513, 1408, 1322, 1246, 1212, 1176, 1124, 1066, 850, 731.

### 3-(Benzo[d][1,3]dioxol-5-yl)-5-(3,4-diethoxyphenyl)-2-methyl-2,3-dihydroisoxazole-4-sulfonyl fluoride (4bg)

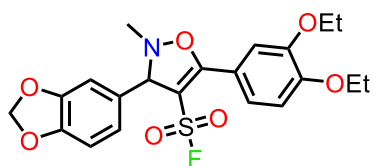

Following general procedure D, the title compound was isolated after purification by flash column chromatography (0-20% EtOAc in petroleum ether) as a yellow oil (43.0 mg, 96%). **<sup>1</sup>H NMR** (500 MHz, CDCl<sub>3</sub>) δ 7.42 (dd, *J* = 8.5, 2.1 Hz, 1H), 7.32 (d, *J* = 2.1 Hz, 1H), 6.94 (d, *J* = 8.5 Hz, 1H), 6.93 – 6.89 (m, 2H), 6.82 (d, *J* = 7.9 Hz, 1H), 5.98 (appt. q, *J* = 3.0 Hz, 2H), 5.13 (s, 1H), 4.21 – 4.12 (m, 4H), 3.08 (s, 3H), 1.50 (t, *J* = 7.0 Hz, 3H), 1.48 (t, *J* = 7.0 Hz, 3H); **<sup>13</sup>C NMR** (101 MHz, CDCl<sub>3</sub>) δ 165.7 (d, *J* = 1.7 Hz), 153.3, 148.4, 148.2, 133.0, 124.4, 120.9, 116.2, 114.6, 112.1, 108.6, 107.4, 101.4, 100.5 (d, *J* = 29.5 Hz), 76.7, 65.0, 64.7, 46.9, 14.8, 14.7; **<sup>19</sup>F NMR** (376 MHz, CDCl<sub>3</sub>) δ 73.8; **HRMS** (ESI<sup>+</sup>): calculated for C<sub>21</sub>H<sub>22</sub>FNO<sub>7</sub>Na [M+Na<sup>+</sup>]: *m/z* = 474.0993, *m/z* found 474.0988; **IR** *v*<sub>max</sub> (ATR)/cm<sup>-1</sup>: 2985, 2931, 2884, 1735, 1599, 1505, 1398, 1241, 1201, 1036, 742.

### 2-Methyl-5-phenyl-3-(3-(trifluoromethoxy)phenyl)-2,3-dihydroisoxazole-4-sulfonyl fluoride (4bh)

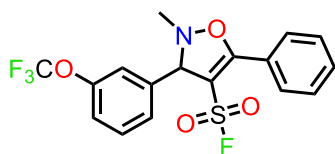

Following general procedure D, the title compound was isolated after purification by flash column chromatography (0-15% EtOAc in petroleum ether) as a yellow oil (29.0 mg, 73%). **<sup>1</sup>H NMR** (400 MHz, CDCl<sub>3</sub>) δ 7.75 (appt. d, *J* = 7.2 Hz, 1H), 7.61 (appt. t, *J* = 6.9 Hz, 1H), 7.51 (appt. t, *J* = 7.6 Hz, 1H), 7.48 – 7.39 (m, 1H), 7.35 (br s, 1H), 7.24 (br d, *J* = 7.7 Hz, 1H), 5.25 (s, 1H), 3.14 (s, 3H); **<sup>13</sup>C NMR** (101 MHz, CDCl<sub>3</sub>) δ 166.5 (d, *J* = 2.2 Hz), 149.8 (q, *J* = 1.7 Hz), 141.2, 133.4, 130.6, 130.2, 128.8, 125.4, 124.3, 121.4, 120.6 (q, *J* = 257.6 Hz), 119.8, 102.4 (d, *J* = 30.8 Hz), 76.0, 47.1; **<sup>19</sup>F NMR** (376 MHz, CDCl<sub>3</sub>) δ 73.8, -57.8; **HRMS** (ESI<sup>+</sup>): calculated for C<sub>17</sub>H<sub>14</sub>F<sub>4</sub>NO<sub>4</sub>S [M+H<sup>+</sup>]: *m/z* = 404.0574, *m/z* found 404.0573; **IR** *v*<sub>max</sub> (ATR)/cm<sup>-1</sup>: 3068, 2857, 1704, 1408, 751.

### 3-(4-Methoxyphenyl)-2-methyl-5-(4-propylphenyl)-2,3-dihydroisoxazole-4-sulfonyl fluoride (4bi)

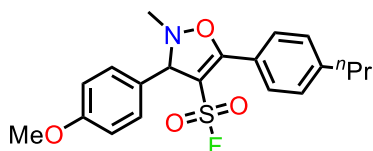

Following general procedure D, the title compound was isolated after purification by flash column chromatography (0-15% EtOAc in petroleum ether) as a yellow oil (34.0 mg, 87%). **<sup>1</sup>H NMR** (400 MHz, CDCl<sub>3</sub>) δ 7.69 (appt. d, *J* = 8.3 Hz, 2H), 7.35 (appt. d, *J* = 8.7 Hz, 2H), 7.30 (appt. d, *J* = 8.2 Hz, 2H), 6.93 (appt. d, *J* = 8.7 Hz,

2H), 5.18 (s, 1H), 3.82 (s, 3H), 3.08 (s, 3H), 2.66 (t,  $J = 7.5$  Hz, 2H), 1.74 – 1.62 (m, 2H), 0.96 (t,  $J = 7.3$  Hz, 3H);  $^{13}\text{C}$  NMR (101 MHz,  $\text{CDCl}_3$ )  $\delta$  166.1, 160.2, 148.8, 130.1, 128.8, 128.5, 121.9, 114.5, 102.1 (d,  $J = 29.9$  Hz), 76.4, 55.5, 46.9, 38.2, 24.3, 13.9;  $^{19}\text{F}$  NMR (376 MHz,  $\text{CDCl}_3$ )  $\delta$  73.5; HRMS (ESI<sup>+</sup>): calculated for  $\text{C}_{20}\text{H}_{23}\text{FNO}_4\text{S}$  [ $\text{M}+\text{H}^+$ ]:  $m/z = 392.1326$ ,  $m/z$  found 392.1332; IR  $\nu_{\text{max}}$  (ATR)/ $\text{cm}^{-1}$ : 2961, 2931, 2872, 1610, 1511, 748.

### 3-(4-Fluorophenyl)-2-methyl-5-phenyl-2,3-dihydroisoxazole-4-sulfonyl fluoride (4bj)

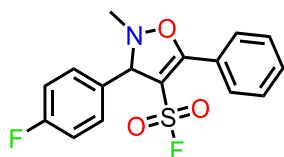

Following general procedure D, the title compound was isolated after purification by flash column chromatography (0-15% EtOAc in petroleum ether) as a yellow oil (28.0 mg, 74%).  $^1\text{H}$  NMR (400 MHz,  $\text{CDCl}_3$ )  $\delta$  7.75 (appt. d,  $J = 7.2$  Hz, 2H), 7.61 (appt. t,  $J = 6.9$  Hz, 1H), 7.50 (appt. t,  $J = 7.6$  Hz, 2H), 7.47 – 7.40 (m, 2H), 7.10 (appt. t,  $J = 8.7$  Hz, 2H), 5.22 (s, 1H), 3.12 (s, 3H);  $^{13}\text{C}$  NMR (101 MHz,  $\text{CDCl}_3$ )  $\delta$  166.1 (d,  $J = 2.3$  Hz), 163.2 (d,  $J = 247.9$  Hz), 134.7, 133.3, 130.1, 129.0 (d,  $J = 8.4$  Hz), 128.8, 124.4, 116.1 (d,  $J = 21.8$  Hz), 102.8 (d,  $J = 30.4$  Hz), 76.1, 47.1;  $^{19}\text{F}$  NMR (376 MHz,  $\text{CDCl}_3$ )  $\delta$  73.6, -112.8; HRMS (ESI<sup>+</sup>): calculated for  $\text{C}_{16}\text{H}_{14}\text{F}_2\text{NO}_3\text{S}$  [ $\text{M}+\text{H}^+$ ]:  $m/z = 338.0657$ ,  $m/z$  found 338.0657; IR  $\nu_{\text{max}}$  (ATR)/ $\text{cm}^{-1}$ : 3069, 2967, 2923, 1509, 1403, 746.



## Synthesis and experimental data for compounds 4ca-4ar

### General procedure E

To a solution of the required SASF **2** (100  $\mu$ mol) and the required azide **3c** (100  $\mu$ mol) in DCE (1.00 mL) was added  $[\text{Rh}(\text{CO})_2\text{Cl}]_2$  (1.00 mg, 2.50 mol%) and stirred at 40  $^\circ\text{C}$  for 16 h.<sup>[18]</sup> The solvent was removed under reduced pressure and the crude mixture was purified by flash column chromatography to obtain the analytically pure product.

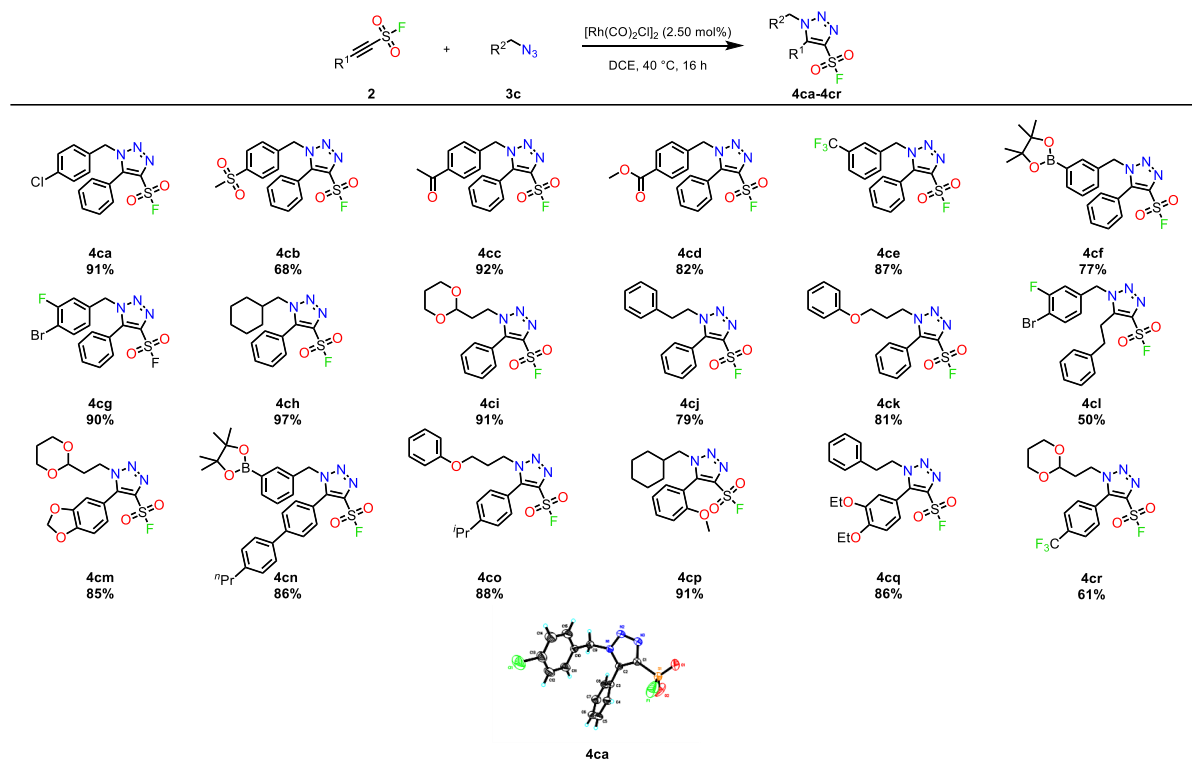

### 1-(4-Chlorobenzyl)-5-phenyl-1H-1,2,3-triazole-4-sulfonyl fluoride (4ca)

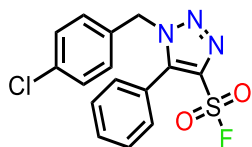

Following general procedure E, the title compound was isolated after purification by flash column chromatography (0-20% EtOAc in petroleum ether) as a colourless solid (32.0 mg, 91%). **m.p.** 129 - 130  $^\circ\text{C}$ ;  **$^1\text{H}$  NMR** (400 MHz,  $\text{CDCl}_3$ )  $\delta$  7.65 – 7.59 (m, 1H), 7.57 – 7.49 (m, 2H), 7.30 – 7.27 (m, 2H), 7.26 – 7.22 (m, 2H), 6.98 (appt. d,  $J = 8.7$  Hz, 2H), 5.44 (s, 2H).  **$^{13}\text{C}$  NMR** (126 MHz,  $\text{CDCl}_3$ )  $\delta$  141.6 (d,  $J = 2.7$  Hz), 138.3 (d,  $J = 35.8$  Hz), 135.4, 131.9, 131.7, 129.7, 129.5, 129.4, 122.8, 52.5;  **$^{19}\text{F}$  NMR** (376 MHz,  $\text{CDCl}_3$ )  $\delta$  68.6; **HRMS** (ESI<sup>+</sup>): calculated for  $\text{C}_{15}\text{H}_{12}\text{ClFN}_3\text{O}_2\text{S}$   $[\text{M}+\text{H}^+]$ :  $m/z = 352.0317$ ,  $m/z$  found 352.0314; **IR**  $\nu_{\text{max}}$  (ATR)/ $\text{cm}^{-1}$ : 3061, 2852, 1493, 1427, 1204, 1093, 783.

#### 1-(4-(Methylsulfonyl)benzyl)-5-phenyl-1*H*-1,2,3-triazole-4-sulfonyl fluoride (4cb)

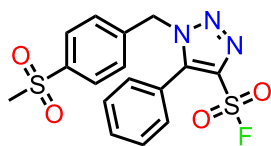

Following general procedure E, the title compound was isolated after purification by flash column chromatography (0-70% EtOAc in petroleum ether) as a colourless solid (27.0 mg, 68%). **m.p.** 98 - 99 °C; **<sup>1</sup>H NMR** (500 MHz, CDCl<sub>3</sub>) δ 7.89 (appt. d, *J* = 8.2 Hz, 2H), 7.62 (appt. t, *J* = 7.5 Hz, 1H), 7.54 (appt. t, *J* = 7.7 Hz, 2H), 7.26 (m, 4H), 5.55 (s, 2H), 3.04 (s, 3H). **<sup>13</sup>C NMR** (126 MHz, CDCl<sub>3</sub>) δ 141.9 (d, *J* = 2.6 Hz), 141.5, 139.2, 138.4 (d, *J* = 36.2 Hz), 132.0, 129.6, 129.6, 128.9, 128.4, 122.5, 52.3, 44.5; **<sup>19</sup>F NMR** (376 MHz, CDCl<sub>3</sub>) δ 68.6; **HRMS** (ESI<sup>+</sup>): calculated for C<sub>16</sub>H<sub>14</sub>F<sub>2</sub>N<sub>3</sub>O<sub>4</sub>S<sub>2</sub>Na [M+Na<sup>+</sup>]: *m/z* = 418.0302, *m/z* found 418.0305; **IR** *v*<sub>max</sub> (ATR)/cm<sup>-1</sup>: 2926, 2857, 1416, 1307, 1146, 722.

#### 1-(4-Acetylbenzyl)-5-phenyl-1*H*-1,2,3-triazole-4-sulfonyl fluoride (4cc)

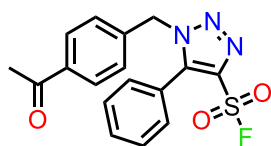

Following general procedure E, the title compound was isolated after purification by flash column chromatography (0-40% EtOAc in petroleum ether) as a colourless solid (33.0 mg, 92%). **m.p.** 111 - 112 °C; **<sup>1</sup>H NMR** (500 MHz, CDCl<sub>3</sub>) δ 7.89 (appt. d, *J* = 8.2 Hz, 2H), 7.60 (appt. t, *J* = 7.5 Hz, 1H), 7.51 (appt. t, *J* = 7.7 Hz, 2H), 7.23 (appt. d, *J* = 7.7 Hz, 2H), 7.13 (appt. d, *J* = 8.2 Hz, 2H), 5.52 (s, 2H), 2.58 (s, 3H); **<sup>13</sup>C NMR** (126 MHz, CDCl<sub>3</sub>) δ 197.3, 141.8 (d, *J* = 2.6 Hz), 138.28 (d, *J* = 35.9 Hz), 138.3, 137.6, 131.8, 129.7, 129.4, 129.2, 128.1, 122.6, 52.7, 26.8; **<sup>19</sup>F NMR** (376 MHz, CDCl<sub>3</sub>) δ 68.6; **HRMS** (ESI<sup>+</sup>): calculated for C<sub>17</sub>H<sub>14</sub>FN<sub>3</sub>O<sub>3</sub>SNa [M+Na<sup>+</sup>]: *m/z* = 382.0632, *m/z* found 382.0630; **IR** *v*<sub>max</sub> (ATR)/cm<sup>-1</sup>: 2925, 2855, 1681, 1610, 1428, 1201, 776.

#### Methyl 4-((4-(fluorosulfonyl)-5-phenyl-1*H*-1,2,3-triazol-1-yl)methyl)benzoate (4cd)

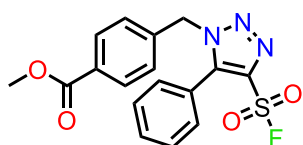

Following general procedure E, the title compound was isolated after purification by flash column chromatography (0-30% EtOAc in petroleum ether) as a colourless solid (31.0 mg, 82%). **m.p.** 129 - 130 °C; **<sup>1</sup>H**

**NMR** (500 MHz, CDCl<sub>3</sub>) δ 7.97 (appt. d, *J* = 8.5 Hz, 1H), 7.59 (appt. t, *J* = 6.9 Hz, 1H), 7.50 (appt. t, *J* = 8.0 Hz, 1H), 7.21 (appt. d, *J* = 7.1 Hz, 1H), 7.09 (appt. d, *J* = 8.6 Hz, 1H), 5.52 (s, 1H), 3.92 (s, 2H); **<sup>13</sup>C NMR** (126 MHz, CDCl<sub>3</sub>) δ 166.4, 141.8 (d, *J* = 2.7 Hz), 138.3 (d, *J* = 36.0 Hz), 138.1, 131.8, 131.0, 130.5, 129.7, 129.4, 127.8, 122.7, 52.8, 52.5; **<sup>19</sup>F NMR** (376 MHz, CDCl<sub>3</sub>) δ 68.6; **HRMS** (ESI<sup>+</sup>): calculated for C<sub>17</sub>H<sub>14</sub>FN<sub>3</sub>O<sub>4</sub>SNa [M+Na<sup>+</sup>]: *m/z* = 398.0581; *m/z* found 398.0579; **IR** *v*<sub>max</sub> (ATR)/cm<sup>-1</sup>: 2955, 2925, 2854, 1725, 1281, 768.

#### 5-Phenyl-1-(3-(trifluoromethyl)benzyl)-1*H*-1,2,3-triazole-4-sulfonyl fluoride (4ce)

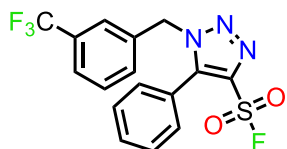

Following general procedure E, the title compound was isolated after purification by flash column chromatography (0-20% EtOAc in petroleum ether) as a yellow oil (34.0 mg, 87%) **<sup>1</sup>H NMR** (500 MHz, CDCl<sub>3</sub>) δ 7.65 – 7.58 (m, 2H), 7.56 – 7.51 (m, 2H), 7.47 (appt. t, *J* = 7.8 Hz, 1H), 7.30 (appt. d, *J* = 7.8 Hz, 1H), 7.24 – 7.19 (m, 3H), 5.54 (s, 2H); **<sup>13</sup>C NMR** (126 MHz, CDCl<sub>3</sub>) δ 141.7 (d, *J* = 2.8 Hz), 138.4 (d, *J* = 36.1 Hz), 134.2, 131.9, 132.1 – 131.2 (m), 131.5, 130.0, 129.6, 129.5, 126.2 (q, *J* = 3.7 Hz), 125.2 (q, *J* = 3.8 Hz), 123.6 (q, *J* = 272.6 Hz), 122.7, 52.7; **<sup>19</sup>F NMR** (471 MHz, CDCl<sub>3</sub>) δ 68.6, -62.9; **HRMS** (ESI<sup>+</sup>): calculated for C<sub>16</sub>H<sub>11</sub>F<sub>4</sub>N<sub>3</sub>O<sub>2</sub>SNa [M+Na<sup>+</sup>]: *m/z* = 408.0400, *m/z* found 408.0400; **IR** *v*<sub>max</sub> (ATR)/cm<sup>-1</sup>: 3068, 2926, 1424, 1327, 1202, 1124, 1074, 779.

#### 5-Phenyl-1-(3-(4,4,5,5-tetramethyl-1,3,2-dioxaborolan-2-yl)benzyl)-1*H*-1,2,3-triazole-4-sulfonyl fluoride (4cf)

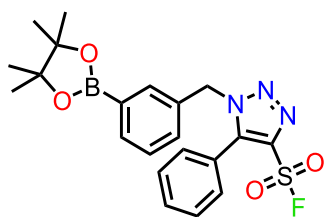

Following general procedure E, the title compound was isolated after purification by flash column chromatography (0-20% EtOAc in petroleum ether) as a colourless solid (34.0 mg, 77%). **m.p.** 108 - 109 °C; **<sup>1</sup>H NMR** (500 MHz, CDCl<sub>3</sub>) δ 7.75 (appt. dt, *J* = 7.4, 1.0 Hz, 1H), 7.61 – 7.56 (m, 1H), 7.53 – 7.46 (m, 3H), 7.30 (appt. t, *J* = 7.6 Hz, 1H), 7.25 – 7.21 (m, 2H), 7.09 (appt. ddd, *J* = 7.7, 1.9, 1.3 Hz, 1H), 5.48 (s, 2H), 1.34 (s, 12H); **<sup>13</sup>C NMR** (126 MHz, CDCl<sub>3</sub>) δ 141.7 (d, *J* = 2.7 Hz), 138.1 (d, *J* = 35.7 Hz), 135.4, 134.4, 132.7, 131.5, 130.7, 129.8, 129.3, 128.6, 122.9, 84.2, 53.3, 25.0; **<sup>19</sup>F NMR** (471 MHz, CDCl<sub>3</sub>) δ 68.6; **HRMS** (ESI<sup>+</sup>): calculated for C<sub>21</sub>H<sub>24</sub>BFN<sub>3</sub>O<sub>4</sub>S [M+H<sup>+</sup>]: *m/z* = 444.1559, *m/z* found 444.1564; **IR** *v*<sub>max</sub> (ATR)/cm<sup>-1</sup>: 2982, 2927, 2361, 1417, 1362, 1201, 1147, 780.

#### 1-(4-Bromo-3-fluorobenzyl)-5-phenyl-1*H*-1,2,3-triazole-4-sulfonyl fluoride (4cg)

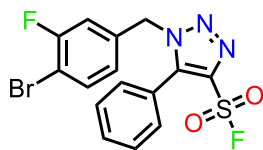

Following general procedure E, the title compound was isolated after purification by flash column chromatography (0-20% EtOAc in petroleum ether) as a colourless solid (37.0 mg, 90%). **m.p.** 103 - 104 °C; **<sup>1</sup>H NMR** (500 MHz, CDCl<sub>3</sub>) δ 7.64 (appt. t, *J* = 7.5 Hz, 1H), 7.56 (appt. t, *J* = 7.7 Hz, 2H), 7.24 (appt. d, *J* = 7.9 Hz, 2H), 7.20 (appt. dd, *J* = 6.2, 1.8 Hz, 1H), 7.05 (appt. t, *J* = 8.3 Hz, 1H), 7.00 – 6.94 (m, 1H), 5.42 (s, 2H); **<sup>13</sup>C NMR** (126 MHz, CDCl<sub>3</sub>) δ 159.6 (d, *J* = 250.6 Hz), 141.6, 138.4 (d, *J* = 36.1 Hz), 133.6, 131.9, 130.6 (d, *J* = 4.0 Hz), 129.7, 129.5, 128.9 (d, *J* = 7.7 Hz), 122.7, 117.3 (d, *J* = 22.9 Hz), 110.0 (d, *J* = 21.6 Hz), 51.9; **<sup>19</sup>F NMR** (376 MHz, CDCl<sub>3</sub>) δ 68.6, -105.6; **HRMS** (ESI<sup>+</sup>): calculated for C<sub>15</sub>H<sub>10</sub>BrF<sub>2</sub>N<sub>3</sub>O<sub>2</sub>SNa [M+Na<sup>+</sup>]: *m/z* = 435.9537, *m/z* found 435.9542; **IR** *v*<sub>max</sub> (ATR)/cm<sup>-1</sup>: 3096, 2980, 2946, 1494, 1426, 771.

#### 1-(Cyclohexylmethyl)-5-phenyl-1*H*-1,2,3-triazole-4-sulfonyl fluoride (4ch)

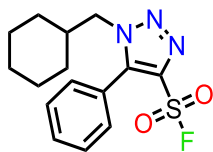

Following general procedure E, the title compound was isolated after purification by flash column chromatography (0-15% EtOAc in petroleum ether) as a colourless solid (31.0 mg, 97%). **m.p.** 71 - 72 °C; **<sup>1</sup>H NMR** (500 MHz, CDCl<sub>3</sub>) δ 7.65 – 7.56 (m, 3H), 7.40 – 7.35 (m, 2H), 4.11 (d, *J* = 7.4 Hz, 2H), 1.96 – 1.85 (m, 1H), 1.72 – 1.59 (m, 3H), 1.55 – 1.48 (m, 2H), 1.23 – 1.04 (m, 3H), 0.90 – 0.80 (m, 2H); **<sup>13</sup>C NMR** (126 MHz, CDCl<sub>3</sub>) δ 141.8 (d, *J* = 2.7 Hz), 137.7 (d, *J* = 35.3 Hz), 131.5, 129.7, 129.4, 123.3, 55.2, 38.4, 30.4, 26.0, 25.4; **<sup>19</sup>F NMR** (471 MHz, CDCl<sub>3</sub>) δ 68.6; **HRMS** (ESI<sup>+</sup>): calculated for C<sub>15</sub>H<sub>19</sub>FN<sub>3</sub>O<sub>2</sub>S [M+H<sup>+</sup>]: *m/z* = 324.1177, *m/z* found 324.1178; **IR** *v*<sub>max</sub> (ATR)/cm<sup>-1</sup>: 2922, 2851, 1422, 1201, 773.

#### 1-(2-(1,3-Dioxan-2-yl)ethyl)-5-phenyl-1*H*-1,2,3-triazole-4-sulfonyl fluoride (4ci)

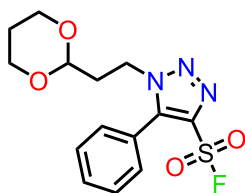

Following general procedure E, the title compound was isolated after purification by flash column chromatography (0-35% EtOAc in petroleum ether) as a yellow oil (31.0 mg, 91%). **<sup>1</sup>H NMR** (500 MHz, CDCl<sub>3</sub>) δ

7.64 – 7.56 (m, 3H), 7.43 – 7.39 (m, 2H), 4.55 (t,  $J = 4.6$  Hz, 1H), 4.43 (t,  $J = 7.1$  Hz, 2H), 4.02 – 3.96 (m, 2H), 3.69 – 3.63 (m, 2H), 2.17 (td,  $J = 7.1, 4.6$  Hz, 2H), 2.01 – 1.90 (m, 1H), 1.33 – 1.27 (m, 1H);  $^{13}\text{C NMR}$  (126 MHz,  $\text{CDCl}_3$ )  $\delta$  141.7 (d,  $J = 2.7$  Hz), 137.7 (d,  $J = 35.5$  Hz), 131.5, 129.7, 129.3, 123.1, 98.8, 66.9, 44.7, 34.7, 25.5;  $^{19}\text{F NMR}$  (471 MHz,  $\text{CDCl}_3$ )  $\delta$  68.6; **HRMS** (ESI<sup>+</sup>): calculated for  $\text{C}_{14}\text{H}_{16}\text{FN}_3\text{O}_4\text{SNa}$  [ $\text{M}+\text{Na}^+$ ]:  $m/z = 364.0738$ ,  $m/z$  found 364.0740; **IR**  $\nu_{\text{max}}$  (ATR)/ $\text{cm}^{-1}$ : 2962, 2926, 2855, 1421, 1201, 1142, 1005, 770.

#### 1-Phenethyl-5-phenyl-1H-1,2,3-triazole-4-sulfonyl fluoride (4cj)

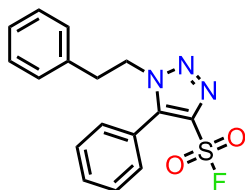

Following general procedure E, the title compound was isolated after purification by flash column chromatography (0-20% EtOAc in petroleum ether) as a yellow oil (26.0 mg, 79%).  $^1\text{H NMR}$  (500 MHz,  $\text{CDCl}_3$ )  $\delta$  7.57 – 7.52 (m, 1H), 7.46 – 7.41 (m, 2H), 7.27 – 7.21 (m, 3H), 6.93 – 6.89 (m, 2H), 6.89 – 6.84 (m, 2H), 4.48 (t,  $J = 7.0$  Hz, 2H), 3.22 (t,  $J = 7.0$  Hz, 2H);  $^{13}\text{C NMR}$  (126 MHz,  $\text{CDCl}_3$ )  $\delta$  142.1 (d,  $J = 2.6$  Hz), 137.6 (d,  $J = 35.6$  Hz), 136.1, 131.3, 129.5, 129.1, 129.1, 128.8, 127.6, 122.7, 50.6, 36.3;  $^{19}\text{F NMR}$  (376 MHz,  $\text{CDCl}_3$ )  $\delta$  68.7; **HRMS** (ESI<sup>+</sup>): calculated for  $\text{C}_{16}\text{H}_{14}\text{FN}_3\text{O}_2\text{SNa}$  [ $\text{M}+\text{Na}^+$ ]:  $m/z = 332.0863$ ,  $m/z$  found 332.0864; **IR**  $\nu_{\text{max}}$  (ATR)/ $\text{cm}^{-1}$ : 3064, 3030, 2929, 1421, 1200, 773.

#### 1-(3-Phenoxypropyl)-5-phenyl-1H-1,2,3-triazole-4-sulfonyl fluoride (4ck)

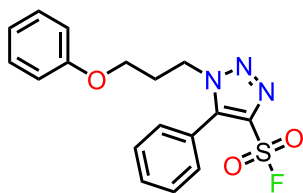

Following general procedure E, the title compound was isolated after purification by flash column chromatography (0-20% EtOAc in petroleum ether) as a yellow oil (29.0 mg, 81%)  $^1\text{H NMR}$  (400 MHz,  $\text{CDCl}_3$ )  $\delta$  7.61 – 7.55 (m, 1H), 7.53 – 7.47 (m, 2H), 7.36 – 7.31 (m, 2H), 7.30 – 7.24 (m, 3H), 7.00 – 6.94 (m, 1H), 6.74 – 6.69 (m, 2H), 4.52 (t,  $J = 6.8$  Hz, 2H), 3.93 (appt. t,  $J = 5.5$  Hz, 2H), 2.45 – 2.37 (m, 2H);  $^{13}\text{C NMR}$  (126 MHz,  $\text{CDCl}_3$ )  $\delta$  158.1 (s), 142.0 (d,  $J = 2.8$  Hz), 137.8 (d,  $J = 35.6$  Hz), 131.5, 129.7, 129.7, 129.4, 122.8, 121.4, 114.3, 63.6, 46.5, 29.5;  $^{19}\text{F NMR}$  (471 MHz,  $\text{CDCl}_3$ )  $\delta$  68.6; **HRMS** (ESI<sup>+</sup>): calculated for  $\text{C}_{17}\text{H}_{16}\text{FN}_3\text{O}_3\text{SNa}$  [ $\text{M}+\text{Na}^+$ ]:  $m/z = 362.0969$ ,  $m/z$  found 362.0966; **IR**  $\nu_{\text{max}}$  (ATR)/ $\text{cm}^{-1}$ : 2925, 1600, 1421, 1242, 1200, 754, 689.

#### 1-(4-Bromo-3-fluorobenzyl)-5-phenethyl-1H-1,2,3-triazole-4-sulfonyl fluoride (4cl)

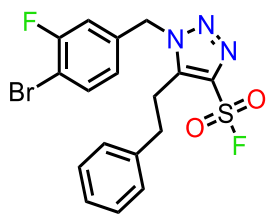

Following general procedure E, the title compound was isolated after purification by flash column chromatography (0-20% EtOAc in petroleum ether) as a yellow oil (22.0 mg, 50%). **<sup>1</sup>H NMR** (500 MHz, CDCl<sub>3</sub>) δ 7.36 – 7.27 (m, 4H), 7.12 (t, *J* = 8.3 Hz, 1H), 7.05 – 6.97 (m, 3H), 4.93 (s, 2H), 3.14 (t, *J* = 7.4 Hz, 2H), 2.84 (t, *J* = 7.4 Hz, 2H); **<sup>13</sup>C NMR** (126 MHz, CDCl<sub>3</sub>) δ 159.6 (d, *J* = 250.8 Hz), 142.1 (d, *J* = 3.4 Hz), 138.6, 137.6 (d, *J* = 35.4 Hz), 133.0, 130.5 (d, *J* = 4.0 Hz), 129.4, 128.6, 128.4 (d, *J* = 7.6 Hz), 127.6, 117.6 (d, *J* = 22.9 Hz), 110.4 (d, *J* = 21.7 Hz), 51.2, 35.1, 25.7; **<sup>19</sup>F NMR** (376 MHz, CDCl<sub>3</sub>) δ 68.7, -105.3 – -105.6 (m); **HRMS** (ESI<sup>+</sup>): calculated for C<sub>17</sub>H<sub>14</sub>BrF<sub>2</sub>N<sub>3</sub>O<sub>2</sub>SNa [M+Na<sup>+</sup>]: *m/z* = 463.9850, *m/z* found 463.9853; **IR** *v*<sub>max</sub> (ATR)/cm<sup>-1</sup>: 3064, 3030, 2929, 2213, 1497, 1417, 1213, 779.

**1-(2-(1,3-Dioxan-2-yl)ethyl)-5-(benzo[d][1,3]dioxol-5-yl)-1H-1,2,3-triazole-4-sulfonyl fluoride (4cm)**

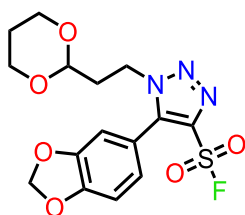

Following general procedure E, the title compound was isolated after purification by flash column chromatography (0-20% EtOAc in petroleum ether) as a yellow oil (33.0 mg, 85%). **<sup>1</sup>H NMR** (400 MHz, CDCl<sub>3</sub>) δ 6.98 (d, *J* = 8.0 Hz, 1H), 6.88 (dd, *J* = 8.0, 1.8 Hz, 1H), 6.85 (d, *J* = 1.8 Hz, 1H), 6.10 (s, 2H), 4.58 (t, *J* = 4.6 Hz, 1H), 4.43 (t, *J* = 7.1 Hz, 2H), 4.07 – 3.98 (m, 2H), 3.73 – 3.64 (m, 2H), 2.18 (td, *J* = 7.1, 4.6 Hz, 2H), 2.06 – 1.92 (m, 1H), 1.34 – 1.30 (m, 1H); **<sup>13</sup>C NMR** (101 MHz, CDCl<sub>3</sub>) δ 150.4, 148.6, 141.4 (d, *J* = 2.8 Hz), 137.6 (d, *J* = 35.3 Hz), 124.4, 115.9, 109.7, 109.2, 102.2, 98.8, 66.9, 44.6, 34.7, 25.6; **<sup>19</sup>F NMR** (376 MHz, CDCl<sub>3</sub>) δ 68.5; **HRMS** (ESI<sup>+</sup>): calculated for C<sub>15</sub>H<sub>16</sub>FN<sub>3</sub>O<sub>6</sub>Na [M+Na<sup>+</sup>]: *m/z* = 408.0636, *m/z* found 408.0636; **IR** *v*<sub>max</sub> (ATR)/cm<sup>-1</sup>: 2924, 2854, 1477, 1420, 1200, 1141, 1036, 772.

**5-(4'-Propyl-[1,1'-biphenyl]-4-yl)-1-(3-(4,4,5,5-tetramethyl-1,3,2-dioxaborolan-2-yl)benzyl)-1H-1,2,3-triazole-4-sulfonyl fluoride (4cn)**

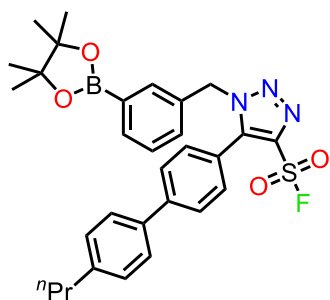

Following general procedure E, the title compound was isolated after purification by flash column chromatography (0-20% EtOAc in petroleum ether) as a yellow solid (48.0 mg, 86%). **m.p.** 123 - 124 °C **<sup>1</sup>H NMR** (400 MHz, CDCl<sub>3</sub>) δ 7.77 (appt. d, *J* = 7.4 Hz, 1H), 7.71 (appt. d, *J* = 8.5 Hz, 2H), 7.57 (appt. d, *J* = 8.2 Hz, 2H), 7.53 (s, 1H), 7.34 – 7.27 (m, 5H), 7.14 (appt. ddd, *J* = 7.7, 1.7, 1.3 Hz, 1H), 5.52 (s, 2H), 2.67 (appt. t, *J* = 7.4 Hz, 2H), 1.76 – 1.65 (m, 2H), 1.30 (s, 12H), 0.99 (t, *J* = 7.3 Hz, 3H); **<sup>13</sup>C NMR** (101 MHz, CDCl<sub>3</sub>) δ 144.4, 143.3, 141.7 (d, *J* = 2.7 Hz), 138.1 (d, *J* = 35.5 Hz), 136.9, 135.5, 134.4, 132.8, 130.7, 130.2, 129.3, 128.6, 127.6, 127.2, 121.1, 84.2, 53.3, 37.8, 24.9, 24.6, 13.9; **<sup>19</sup>F NMR** (376 MHz, CDCl<sub>3</sub>) δ 68.6; **HRMS** (ESI<sup>+</sup>): calculated for C<sub>30</sub>H<sub>33</sub>BFN<sub>3</sub>O<sub>4</sub>SNa [M+Na<sup>+</sup>]: *m/z* = 584.2161, *m/z* found 584.2163; **IR** *v*<sub>max</sub> (ATR)/cm<sup>-1</sup>: 2980, 2868, 2360, 1424, 1360, 1203, 776.

**5-(4-Isopropylphenyl)-1-(3-phenoxypropyl)-1H-1,2,3-triazole-4-sulfonyl fluoride (4co)**

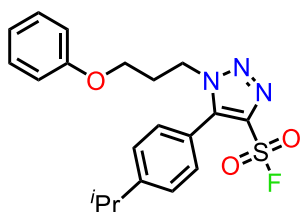

Following general procedure E, the title compound was isolated after purification by flash column chromatography (0-20% EtOAc in petroleum ether) as a yellow oil (35.0 mg, 88%). **<sup>1</sup>H NMR** (500 MHz, CDCl<sub>3</sub>) δ 7.37 (appt. d, *J* = 8.1 Hz, 1H), 7.31 – 7.25 (m, 4H), 7.01 – 6.96 (m, 1H), 6.74 (appt. d, *J* = 7.8 Hz, 1H), 4.54 (t, *J* = 6.8 Hz, 2H), 3.95 (appt. t, *J* = 5.6 Hz, 1H), 3.01 (hept, *J* = 6.9 Hz, 1H), 2.48 – 2.40 (m, 2H), 1.33 (d, *J* = 6.9 Hz, 6H); **<sup>13</sup>C NMR** (126 MHz, CDCl<sub>3</sub>) δ 158.1, 152.6, 142.2 (d, *J* = 2.7 Hz), 137.6 (d, *J* = 35.4 Hz), 129.7, 129.6, 127.5, 121.4, 120.0, 114.4, 63.6, 46.3, 34.2, 29.5, 23.8; **<sup>19</sup>F NMR** (376 MHz, CDCl<sub>3</sub>) δ 68.5; **HRMS** (ESI<sup>+</sup>): calculated for C<sub>20</sub>H<sub>23</sub>FN<sub>3</sub>O<sub>3</sub>SNa [M+H<sup>+</sup>]: *m/z* = 426.1258, *m/z* found 426.1254; **IR** *v*<sub>max</sub> (ATR)/cm<sup>-1</sup>: 2962, 2874, 1600, 1495, 1422, 1242, 1201, 777, 754.

#### 1-(Cyclohexylmethyl)-5-(2-methoxyphenyl)-1*H*-1,2,3-triazole-4-sulfonyl fluoride (4cp)

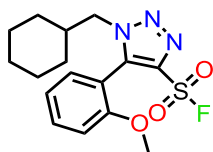

Following general procedure E, the title compound was isolated after purification by flash column chromatography (0-20% EtOAc in petroleum ether) as a yellow oil (32.0 mg, 91%). <sup>1</sup>H NMR (400 MHz, CDCl<sub>3</sub>) δ 7.58 (ddd, *J* = 8.4, 7.5, 1.8 Hz, 1H), 7.22 (dd, *J* = 7.6, 1.7 Hz, 1H), 7.13 (appt. td, *J* = 7.5, 0.9 Hz, 1H), 7.07 (d, *J* = 8.4 Hz, 1H), 4.04 (ddd, *J* = 61.5, 13.5, 7.4 Hz, 2H), 3.81 (s, 3H), 1.95 – 1.82 (m, 1H), 1.70 – 1.58 (m, 3H), 1.59 – 1.44 (m, 2H), 1.22 – 1.06 (m, 3H), 0.89 – 0.77 (m, 2H); <sup>13</sup>C NMR (101 MHz, CDCl<sub>3</sub>) δ 157.3, 139.1 (d, *J* = 3.0 Hz), 138.0 (d, *J* = 35.1 Hz), 133.3, 131.2, 121.1, 112.2, 111.7, 55.8, 55.4, 38.1, 30.4 (d, *J* = 5.4 Hz), 26.0, 25.5; <sup>19</sup>F NMR (376 MHz, CDCl<sub>3</sub>) δ 66.9; HRMS (ESI<sup>+</sup>): calculated for C<sub>16</sub>H<sub>21</sub>FN<sub>3</sub>O<sub>3</sub>S [M+H<sup>+</sup>]: *m/z* = 354.1282, *m/z* found 354.1281; IR *v*<sub>max</sub> (ATR)/cm<sup>-1</sup>: 2927, 2852, 1609, 1486, 1419, 1200, 772.

#### 5-(3,4-Diethoxyphenyl)-1-phenethyl-1*H*-1,2,3-triazole-4-sulfonyl fluoride (4cq)

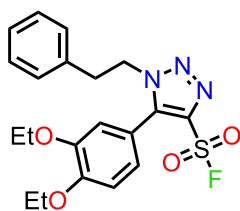

Following general procedure E, the title compound was isolated after purification by flash column chromatography (0-20% EtOAc in petroleum ether) as a yellow oil (36.0 mg, 86%). <sup>1</sup>H NMR (500 MHz, CDCl<sub>3</sub>) δ 7.26 – 7.21 (m, 3H), 6.91 – 6.86 (m, 3H), 6.52 – 6.48 (m, 2H), 4.51 (t, *J* = 7.1 Hz, 2H), 4.15 (q, *J* = 7.0 Hz, 2H), 4.00 (q, *J* = 7.0 Hz, 2H), 3.22 (t, *J* = 7.0 Hz, 2H), 1.50 (t, *J* = 7.0 Hz, 3H), 1.45 (t, *J* = 7.0 Hz, 3H); <sup>13</sup>C NMR (126 MHz, CDCl<sub>3</sub>) δ 151.3, 148.9, 142.1 (d, *J* = 2.5 Hz), 137.4 (d, *J* = 35.1 Hz), 136.2, 129.0, 128.8, 127.5, 122.5, 114.4, 114.2, 112.9, 65.0, 64.7, 50.5, 36.3, 14.8, 14.7; <sup>19</sup>F NMR (376 MHz, CDCl<sub>3</sub>) δ 68.4; HRMS (ESI<sup>+</sup>): calculated for C<sub>20</sub>H<sub>22</sub>FN<sub>3</sub>O<sub>4</sub>SNa [M+Na<sup>+</sup>]: *m/z* = 442.1207, *m/z* found 442.1209; IR *v*<sub>max</sub> (ATR)/cm<sup>-1</sup>: 2983, 2931, 1606, 1501, 1421, 1258, 1196, 1142, 1039, 770.



**1-(2-(1,3-Dioxan-2-yl)ethyl)-5-(4-(trifluoromethyl)phenyl)-1*H*-1,2,3-triazole-4-sulfonyl fluoride (4cr)**

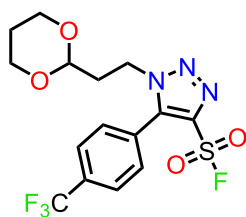

Following general procedure E, the title compound was isolated after purification by flash column chromatography (0-30% EtOAc in petroleum ether) as a yellow oil (25.0 mg, 61%). <sup>1</sup>H NMR (400 MHz, CDCl<sub>3</sub>) δ 7.86 (d, *J* = 8.1 Hz, 2H), 7.58 (d, *J* = 8.0 Hz, 2H), 4.58 (t, *J* = 4.4 Hz, 1H), 4.44 (t, *J* = 7.0 Hz, 2H), 4.04 – 3.95 (m, 2H), 3.72 – 3.61 (m, 2H), 2.20 (td, *J* = 7.0, 4.5 Hz, 2H), 1.94 (qt, *J* = 12.5, 5.0 Hz, 1H), 1.35 – 1.28 (m, 1H); <sup>13</sup>C NMR (101 MHz, CDCl<sub>3</sub>) δ 140.2 (d, *J* = 2.9 Hz), 138.1 (d, *J* = 36.0 Hz), 133.6 (q, *J* = 33.3 Hz), 130.5, 127.0, 126.4 (q, *J* = 3.7 Hz), 123.5 (d, *J* = 272.8 Hz), 98.7, 66.9, 44.8, 34.6, 25.5; <sup>19</sup>F NMR (376 MHz, CDCl<sub>3</sub>) δ 68.7, -63.2; HRMS (ESI<sup>+</sup>): calculated for C<sub>15</sub>H<sub>15</sub>F<sub>4</sub>N<sub>3</sub>O<sub>4</sub>Na [M+Na<sup>+</sup>]: *m/z* = 410.0792, *m/z* found 410.0793; IR *v*<sub>max</sub> (ATR)/cm<sup>-1</sup>: 2967, 2858, 1424, 1323, 1202, 1127, 1070, 1003, 849, 785

## Synthesis and experimental data for compounds 4da-4dk

### General procedure F

To a solution of the required SASF **2** (500  $\mu\text{mol}$ ) and the required hydrazonoyl chloride **14** (250  $\mu\text{mol}$ ) in MeCN (500  $\mu\text{L}$ ) was added DIPEA (65.2  $\mu\text{L}$ , 375  $\mu\text{mol}$ ) and stirred at room temperature for 1 h. The reaction mixture was then extracted into EtOAc (10.0 mL) washed with brine (10.0 mL) and  $\text{H}_2\text{O}$  (2 x 10.0 mL). The aqueous layer was extracted with EtOAc (10.0 mL), the organic fractions combined, dried over anhydrous  $\text{MgSO}_4$ , filtered under vacuum and the solvent was removed under reduced pressure. The crude mixture was purified by flash column chromatography to obtain the analytically pure product.

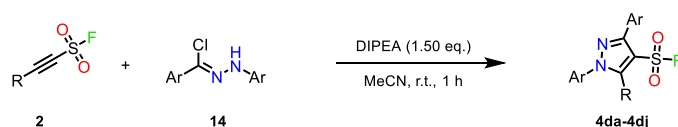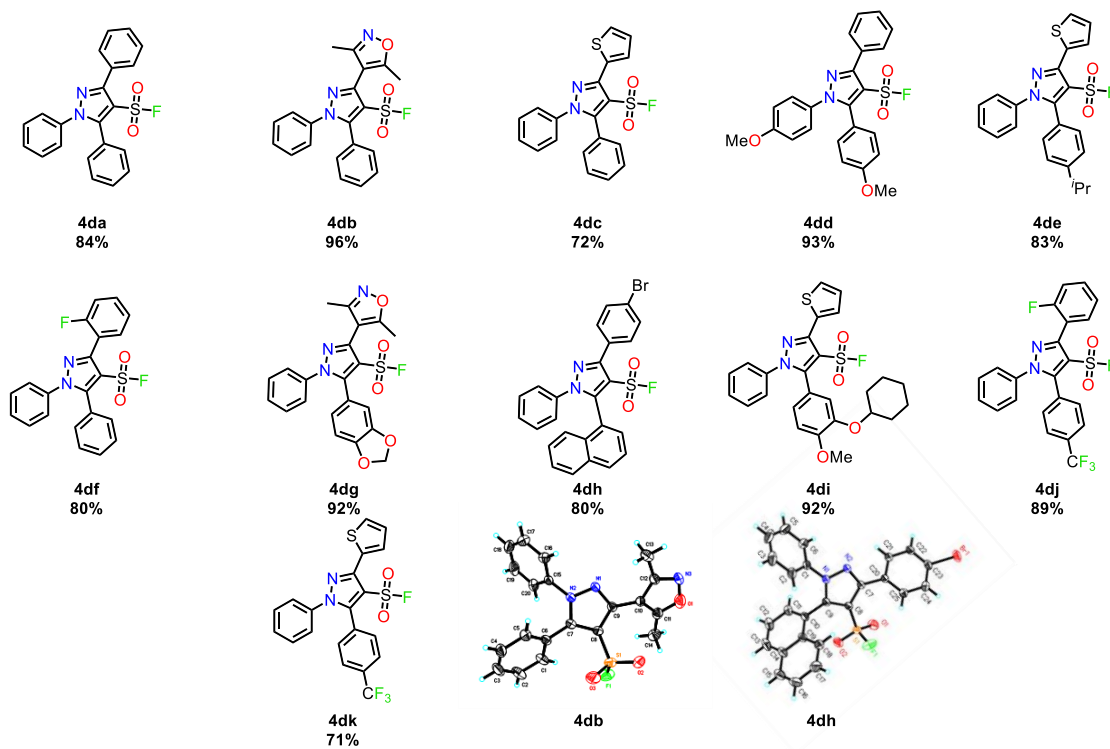

### 1,3,5-Triphenyl-1*H*-pyrazole-4-sulfonyl fluoride (4da)

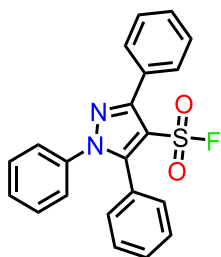

Following general procedure F, the title compound was isolated after purification by flash column chromatography (0-5% EtOAc in petroleum ether) as an off white solid (80.0 mg, 84%). **m.p.** 138 - 139 °C; **<sup>1</sup>H NMR** (500 MHz, CDCl<sub>3</sub>) δ = 7.85 – 7.81 (m, 2H), 7.53 – 7.46 (m, 4H), 7.44 – 7.40 (m, 2H), 7.39 – 7.36 (m, 2H), 7.36 – 7.32 (m, 3H), 7.30 – 7.27 (m, 2H); **<sup>13</sup>C NMR** (126 MHz, CDCl<sub>3</sub>) δ = 152.8, 147.8 (d, *J* = 2.0 Hz), 138.4, 130.6, 130.5, 130.3, 129.8, 129.5, 129.2, 129.0, 128.7, 128.5, 126.8, 125.6, 112.3 (d, *J* = 31.2 Hz); **<sup>19</sup>F NMR** (376 MHz, CDCl<sub>3</sub>) δ = 73.7; **HRMS** (ESI<sup>+</sup>): calculated for C<sub>21</sub>H<sub>16</sub>FN<sub>2</sub>O<sub>2</sub>S [M+H<sup>+</sup>]: *m/z* = 379.0911, *m/z* found 379.0912; **IR** *v*<sub>max</sub> (ATR)/cm<sup>-1</sup>: 3069, 2925, 2853, 1961, 1594, 1494, 1449, 1408, 1221, 1184, 774, 690.

### 3-(3,5-Dimethylisoxazol-4-yl)-1,5-diphenyl-1*H*-pyrazole-4-sulfonyl fluoride (4db)

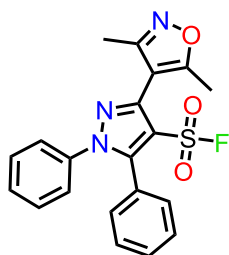

Following general procedure F, the title compound was isolated after purification by flash column chromatography (0-15% EtOAc in petroleum ether) as an off white solid (95.0 mg, 96%). **m.p.** 158 - 161 °C; **<sup>1</sup>H NMR** (500 MHz, CDCl<sub>3</sub>) δ = 7.52 – 7.48 (m, 1H), 7.46 – 7.41 (m, 2H), 7.40 – 7.33 (m, 5H), 7.26 – 7.23 (m, 2H), 2.51 (s, 3H), 2.37 (s, 3H); **<sup>13</sup>C NMR** (126 MHz, CDCl<sub>3</sub>) δ = 169.2, 159.5, 147.5, 143.2, 138.1, 130.9, 130.3, 129.4, 129.3, 128.9, 126.2, 125.3, 114.0 (d, *J* = 30.4 Hz), 106.9, 12.2, 10.8; **<sup>19</sup>F NMR** (376 MHz, CDCl<sub>3</sub>) δ = 73.5; **HRMS** (ESI<sup>+</sup>): calculated for C<sub>20</sub>H<sub>16</sub>FN<sub>3</sub>O<sub>3</sub>SNa [M+Na<sup>+</sup>]: *m/z* = 420.0789, *m/z* found 420.0787; **IR** *v*<sub>max</sub> (ATR)/cm<sup>-1</sup>: 3067, 2926, 1642, 1496, 1409, 1221, 1188, 769.

#### 1,5-Diphenyl-3-(thiophen-2-yl)-1H-pyrazole-4-sulfonyl fluoride (4dc)

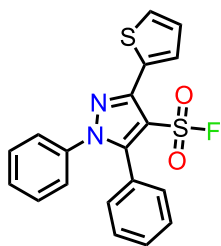

Following general procedure F, the title compound was isolated after purification by flash column chromatography (0-5% EtOAc in petroleum ether) as a beige solid (69.0 mg, 72%). **m.p.** 142 - 143 °C; **<sup>1</sup>H NMR** (400 MHz, CDCl<sub>3</sub>) δ = 7.85 – 7.79 (m, 1H), 7.51 – 7.42 (m, 2H), 7.45 – 7.36 (m, 2H), 7.37 – 7.29 (m, 5H), 7.28 – 7.21 (m, 2H), 7.18 (dd, *J* = 5.1, 3.7 Hz, 1H); **<sup>13</sup>C NMR** (126 MHz, CDCl<sub>3</sub>) δ = 148.3 (d, *J* = 2.6 Hz), 146.3, 138.1, 131.1, 130.6, 130.5, 129.7 (d, *J* = 1.4 Hz), 129.2, 129.1, 128.6, 128.0, 128.0, 126.6, 125.7, 111.2 (d, *J* = 31.9 Hz); **<sup>19</sup>F NMR** (471 MHz, CDCl<sub>3</sub>) δ = 71.5; **HRMS** (ESI<sup>+</sup>): calculated for C<sub>19</sub>H<sub>14</sub>FN<sub>2</sub>O<sub>2</sub>S<sub>2</sub> [M+H<sup>+</sup>]: *m/z* = 385.0475, *m/z* found 385.0481; **IR** ν<sub>max</sub> (ATR)/cm<sup>-1</sup>: 2967, 2923, 1477, 1403, 1214, 1056, 765.

#### 1,5-Bis(4-methoxyphenyl)-3-phenyl-1H-pyrazole-4-sulfonyl fluoride (4dd)

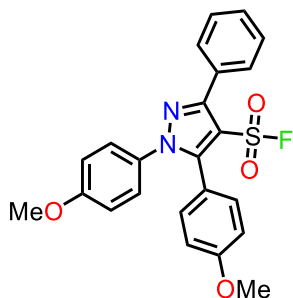

Following general procedure F, the title compound was isolated after purification by flash column chromatography (0-10% EtOAc in petroleum ether) as a colourless solid (102 mg, 93%). **m.p.** 183 - 184 °C; **<sup>1</sup>H NMR** (500 MHz, CDCl<sub>3</sub>) δ = 7.82 – 7.77 (m, 2H), 7.52 – 7.47 (m, 3H), 7.28 (appt. d, *J* = 8.8 Hz, 2H), 7.20 (appt. d, *J* = 9.0 Hz, 2H), 6.92 (appt. d, *J* = 8.8 Hz, 2H), 6.84 (appt. d, *J* = 9.0 Hz, 2H), 3.84 (s, 3H), 3.81 (s, 3H); **<sup>13</sup>C NMR** (126 MHz, CDCl<sub>3</sub>) δ = 161.1, 159.8, 152.5, 147.7, 131.9, 131.5, 130.5, 129.7, 129.5, 128.4, 127.0, 118.8, 114.4, 114.2, 111.6 (d, *J* = 31.0 Hz), 55.7, 55.4; **<sup>19</sup>F NMR** (471 MHz, CDCl<sub>3</sub>) δ = 73.7; **HRMS** (ESI<sup>+</sup>): calculated for C<sub>23</sub>H<sub>20</sub>FN<sub>2</sub>O<sub>4</sub>S [M+H<sup>+</sup>]: *m/z* = 439.1122, *m/z* found 439.1142; **IR** ν<sub>max</sub> (ATR)/cm<sup>-1</sup>: 3010, 2971, 2923, 1610, 1519, 1478, 1405, 1250, 1226, 1169, 1027, 757.

### 5-(4-isopropylphenyl)-1-phenyl-3-(thiophen-2-yl)-1H-pyrazole-4-sulfonyl fluoride (4de)

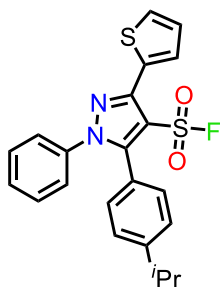

Following general procedure F, the title compound was isolated after purification by flash column chromatography (0-10% EtOAc in petroleum ether) as a Yellow solid (89.0 mg, 83%) **m.p.** 134 - 136 °C; **<sup>1</sup>H NMR** (400 MHz, CDCl<sub>3</sub>) δ = 7.81 (ddd, *J* = 3.7, 1.2, 0.5 Hz, 1H), 7.46 (dd, *J* = 5.1, 1.1 Hz, 1H), 7.36 – 7.30 (m, 3H), 7.26 – 7.22 (m, 6H), 7.17 (dd, *J* = 5.1, 3.7 Hz, 1H), 2.93 (hept, *J* = 6.9 Hz, 1H), 1.26 (d, *J* = 6.9 Hz, 6H); **<sup>13</sup>C NMR** (126 MHz, CDCl<sub>3</sub>) δ = 151.5, 148.5 (d, *J* = 2.5 Hz), 146.3, 138.3, 131.2, 130.4, 129.7 (d, *J* = 1.6 Hz), 129.1, 129.0, 128.0, 127.9, 126.7, 125.7, 123.8, 111.0 (d, *J* = 31.7 Hz), 34.1, 23.8; **<sup>19</sup>F NMR** (376 MHz, CDCl<sub>3</sub>) δ = 71.4; **HRMS** (ESI<sup>+</sup>): calculated for C<sub>22</sub>H<sub>20</sub>FN<sub>2</sub>O<sub>2</sub>S<sub>2</sub> [M+H<sup>+</sup>]: *m/z* = 427.0945, *m/z* found 427.0951; **IR** *v*<sub>max</sub> (ATR)/cm<sup>-1</sup>: 2962, 2927, 1410, 1217, 1191, 839, 757, 708.

### 3-(2-Fluorophenyl)-1,5-diphenyl-1H-pyrazole-4-sulfonyl fluoride (4df)

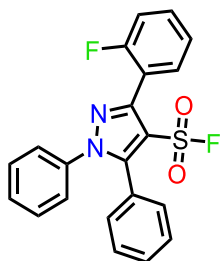

Following general procedure F, the title compound was isolated after purification by flash column chromatography (0-5% EtOAc in petroleum ether) as an off white solid (79.0 mg, 80%). **m.p.** 168 - 169 °C; **<sup>1</sup>H NMR** (500 MHz, CDCl<sub>3</sub>) δ = 7.65 (appt. td, *J* = 7.4, 1.8 Hz, 1H), 7.53 – 7.46 (m, 2H), 7.45 – 7.39 (m, 4H), 7.37 – 7.33 (m, 3H), 7.32 – 7.27 (m, 3H), 7.23 (ddd, *J* = 9.6, 8.3, 1.1 Hz, 1H); **<sup>13</sup>C NMR** (126 MHz, CDCl<sub>3</sub>) δ = 160.8 (d, *J* = 249.8 Hz), 147.8, 147.3, 138.3, 131.9 (d, *J* = 8.3 Hz), 131.6 (d, *J* = 2.5 Hz), 130.7, 130.4, 129.3, 129.1, 128.8, 126.5, 125.6, 124.2 (d, *J* = 3.6 Hz), 118.8 (d, *J* = 15.0 Hz), 115.9 (d, *J* = 21.4 Hz), 113.8 (d, *J* = 31.0 Hz); **<sup>19</sup>F NMR** (376 MHz, CDCl<sub>3</sub>) δ = 72.0 (d, *J* = 11.5 Hz), -112.8 – -113.2 (m); **HRMS** (ESI<sup>+</sup>): calculated for C<sub>21</sub>H<sub>15</sub>F<sub>2</sub>N<sub>2</sub>O<sub>5</sub>S [M+H<sup>+</sup>]: *m/z* = 397.0817, *m/z* found 397.0835; **IR** *v*<sub>max</sub> (ATR)/cm<sup>-1</sup>: 3064, 2923, 2853, 1497, 1458, 1405, 1216, 1182, 764.

### 5-(Benzo[d][1,3]dioxol-5-yl)-3-(3,5-dimethylisoxazol-4-yl)-1-phenyl-1H-pyrazole-4-sulfonyl fluoride (4dg)

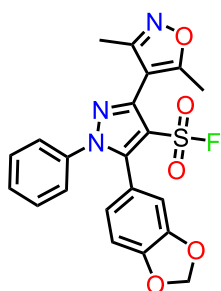

Following general procedure F, the title compound was isolated after purification by flash column chromatography (0-20% EtOAc in petroleum ether) as a colourless solid (101 mg, 92%). **m.p.** 178 - 180 °C; **<sup>1</sup>H NMR** (500 MHz, CDCl<sub>3</sub>) δ = 7.42 – 7.36 (m, 3H), 7.31 – 7.27 (m, 2H), 6.88 – 6.83 (m, 2H), 6.82 – 6.79 (m, 1H), 6.05 (s, 2H), 2.49 (s, 3H), 2.35 (s, 3H); **<sup>13</sup>C NMR** (126 MHz, CDCl<sub>3</sub>) δ = 169.2, 159.5, 149.9, 148.2, 147.1, 143.2, 138.2, 129.5, 129.3, 125.2, 125.1, 119.2, 113.9 (d, *J* = 30.1 Hz), 110.3, 108.9, 107.0, 102.0, 12.2, 10.9; **<sup>19</sup>F NMR** (471 MHz, CDCl<sub>3</sub>) δ = 73.4; **HRMS** (ESI<sup>+</sup>): calculated for C<sub>21</sub>H<sub>17</sub>FN<sub>3</sub>O<sub>5</sub>S [M+H<sup>+</sup>]: *m/z* = 442.0867, *m/z* found 442.0874; **IR** *v*<sub>max</sub> (ATR)/cm<sup>-1</sup>: 3070, 1646, 1484, 1454, 1417, 1236, 1217, 1178, 1039, 756.

### 3-(4-Bromophenyl)-5-(naphthalen-1-yl)-1-phenyl-1H-pyrazole-4-sulfonyl fluoride (4dh)

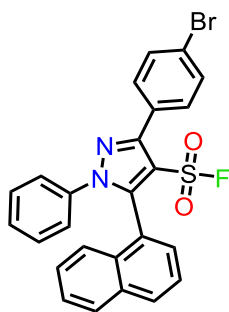

Following general procedure F (0.1 mmol of the required hydrazonoyl chloride), the title compound was isolated after purification by flash column chromatography (0-10% EtOAc in petroleum ether) as a colourless solid (41.0 mg, 80%). **m.p.** 161 - 164 °C; **<sup>1</sup>H NMR** (500 MHz, CDCl<sub>3</sub>) δ = 8.01 – 7.95 (m, 1H), 7.93 – 7.88 (m, 1H), 7.83 – 7.79 (m, 2H), 7.71 – 7.66 (m, 2H), 7.60 – 7.57 (m, 1H), 7.55 – 7.48 (m, 4H), 7.25 – 7.15 (m, 5H); **<sup>13</sup>C NMR** (126 MHz, CDCl<sub>3</sub>) δ = 151.5, 146.9 (d, *J* = 1.9 Hz), 138.4, 133.3, 132.1, 131.8, 131.4, 131.1, 129.6, 129.1, 129.1, 128.9, 127.8, 126.8, 125.1, 124.7, 124.5, 124.4, 124.3, 113.8 (d, *J* = 31.4 Hz). **<sup>19</sup>F NMR** (376 MHz, CDCl<sub>3</sub>) δ = 72.73; **HRMS** (ESI<sup>+</sup>): calculated for C<sub>25</sub>H<sub>17</sub>BrFN<sub>2</sub>O<sub>2</sub>S [M+H<sup>+</sup>]: *m/z* = 507.0173, *m/z* found 507.0156; **IR** *v*<sub>max</sub> (ATR)/cm<sup>-1</sup>: 3056, 2924, 2854, 1595, 1492, 1414, 1226, 767, 745.

### 5-(3-(Cyclohexyloxy)-4-methoxyphenyl)-1-phenyl-3-(thiophen-2-yl)-1H-pyrazole-4-sulfonyl fluoride (4di)

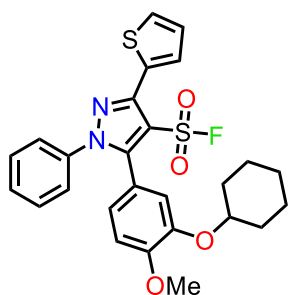

Following general procedure F (100  $\mu$ mol of the required hydrazoneyl chloride), the title compound was isolated after purification by flash column chromatography (0-15% EtOAc in petroleum ether) as a colourless solid (47.0 mg, 92%). **m.p.** 69 - 71  $^{\circ}$ C;  $^1\text{H NMR}$  (400 MHz,  $\text{CDCl}_3$ )  $\delta$  7.79 (d,  $J$  = 3.7 Hz, 1H), 7.46 (dd,  $J$  = 5.1, 0.9 Hz, 1H), 7.36 - 7.31 (m, 3H), 7.29 - 7.24 (m, 2H), 7.17 (dd,  $J$  = 5.1, 3.8 Hz, 1H), 6.92 - 6.84 (m, 2H), 6.76 (d,  $J$  = 1.4 Hz, 1H), 4.30 - 4.20 (m, 1H), 3.70 (s, 3H), 2.08 - 2.00 (m, 2H), 1.88 - 1.79 (m, 2H), 1.64 - 1.52 (m, 3H), 1.42 - 1.28 (m, 3H);  $^{13}\text{C NMR}$  (101 MHz,  $\text{CDCl}_3$ )  $\delta$  150.0, 149.2, 148.2 (d,  $J$  = 2.5 Hz), 146.4, 138.4, 131.2, 129.7, 129.7, 129.2, 128.9, 128.0, 127.9, 125.6, 123.8, 118.3, 114.6, 114.3, 110.8 (d,  $J$  = 31.6 Hz), 56.2, 32.0, 25.6, 24.2;  $^{19}\text{F NMR}$  (376 MHz,  $\text{CDCl}_3$ )  $\delta$  71.4; **HRMS** (ESI $^+$ ): calculated for  $\text{C}_{26}\text{H}_{26}\text{FN}_2\text{O}_4\text{S}_2$  [ $\text{M}+\text{H}^+$ ]:  $m/z$  = 513.1313,  $m/z$  found 513.1309; **IR**  $\nu_{\text{max}}$  (ATR)/ $\text{cm}^{-1}$ : 3104, 2934, 2854, 1604, 1488, 1410, 1254, 1215, 1139, 763.

### 3-(2-Fluorophenyl)-1-phenyl-5-(4-(trifluoromethyl)phenyl)-1H-pyrazole-4-sulfonyl fluoride (4dj)

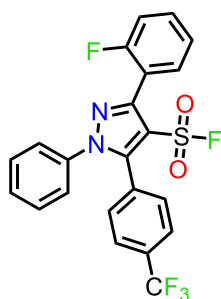

Following general procedure F (100  $\mu$ mol of the required hydrazoneyl chloride), the title compound was isolated after purification by flash column chromatography (0-10% EtOAc in petroleum ether) as a yellow solid (41.0 mg, 89%). **m.p.** 164 - 165  $^{\circ}$ C;  $^1\text{H NMR}$  (400 MHz,  $\text{CDCl}_3$ )  $\delta$  7.83 - 7.78 (m, 2H), 7.68 (d,  $J$  = 8.0 Hz, 2H), 7.51 (d,  $J$  = 8.0 Hz, 2H), 7.41 - 7.34 (m, 3H), 7.27 - 7.24 (m, 2H), 7.21 (appt. t,  $J$  = 8.7 Hz, 2H);  $^{13}\text{C NMR}$  (101 MHz,  $\text{CDCl}_3$ )  $\delta$  164.0 (d,  $J$  = 250.0 Hz), 152.0, 146.3, 137.9, 132.6 (q,  $J$  = 33.0 Hz), 131.5 (d,  $J$  = 8.6 Hz), 131.1, 130.4 (appt. d,  $J$  = 1.1 Hz), 129.6, 129.6, 126.0 (d,  $J$  = 3.4 Hz), 125.8 (q,  $J$  = 3.7 Hz), 125.7, 123.7 (q,  $J$  = 272.7 Hz), 115.8 (d,  $J$  = 21.9 Hz), 112.8 (d,  $J$  = 31.8 Hz);  $^{19}\text{F NMR}$  (376 MHz,  $\text{CDCl}_3$ )  $\delta$  74.0, -63.0, -110.8 - -110.9 (m); **HRMS** (ESI $^+$ ): calculated for  $\text{C}_{22}\text{H}_{14}\text{F}_5\text{N}_2\text{O}_2\text{S}$  [ $\text{M}+\text{H}^+$ ]:  $m/z$  = 465.0691,  $m/z$  found 465.0690; **IR**  $\nu_{\text{max}}$  (ATR)/ $\text{cm}^{-1}$ : 3024, 2885, 2785, 1608, 1493, 1410, 1334, 1219, 1159, 1122, 1070, 838, 787, 761, 689.

**1-Phenyl-3-(thiophen-2-yl)-5-(4-(trifluoromethyl)phenyl)-1H-pyrazole-4-sulfonyl fluoride (4dk)**

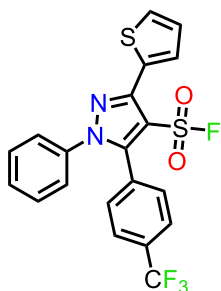

Following general procedure F (100  $\mu$ mol of the required hydrazoneyl chloride), the title compound was isolated after purification by flash column chromatography (0-10% EtOAc in petroleum ether) as a yellow solid (32.0 mg, 71%). **m.p.** 175 - 177  $^{\circ}$ C;  **$^1$ H NMR** (400 MHz,  $\text{CDCl}_3$ )  $\delta$  7.83 (d,  $J$  = 3.6 Hz, 1H), 7.67 (d,  $J$  = 8.2 Hz, 2H), 7.50 – 7.47 (m, 2H), 7.47 (s, 1H), 7.39 – 7.33 (m, 3H), 7.26 – 7.21 (m, 2H), 7.19 (dd,  $J$  = 5.1, 3.8 Hz, 1H);  **$^{13}$ C NMR** (101 MHz,  $\text{CDCl}_3$ )  $\delta$  146.5, 137.6, 132.4 (q,  $J$  = 33.0 Hz), 131.0, 130.6, 130.2 (q,  $J$  = 1.0 Hz), 129.8 (d,  $J$  = 1.4 Hz), 129.4, 129.4, 128.1, 128.0, 125.6, 125.5 (q,  $J$  = 3.7 Hz), 123.5 (q,  $J$  = 272.6 Hz), 111.6 (d,  $J$  = 32.5 Hz);  **$^{19}$ F NMR** (376 MHz,  $\text{CDCl}_3$ )  $\delta$  71.5, -63.0. **HRMS** (ESI $^+$ ): calculated for  $\text{C}_{20}\text{H}_{13}\text{F}_4\text{N}_2\text{O}_2\text{S}_2$  [ $\text{M}+\text{H}^+$ ]:  $m/z$  = 453.0349,  $m/z$  found 453.0350; **IR**  $\nu_{\text{max}}$  (ATR)/ $\text{cm}^{-1}$ : 3112, 3084, 2923, 1410, 1322, 1218, 1170, 1141, 1122, 1066, 850, 767, 709.



## Synthesis and experimental data for compounds 4ea-4ay

### General Procedure G

A vial containing a solution of the required SASF **2** (250  $\mu\text{mol}$ ) and the required Sydnone **3e** (250  $\mu\text{mol}$ ) in toluene (2.00 mL) was sealed and stirred at 120  $^{\circ}\text{C}$  for 16 h. The reaction mixture was cooled, unsealed and the solvent was removed under reduced pressure. The crude product was purified by flash column chromatography to obtain the analytically pure product.

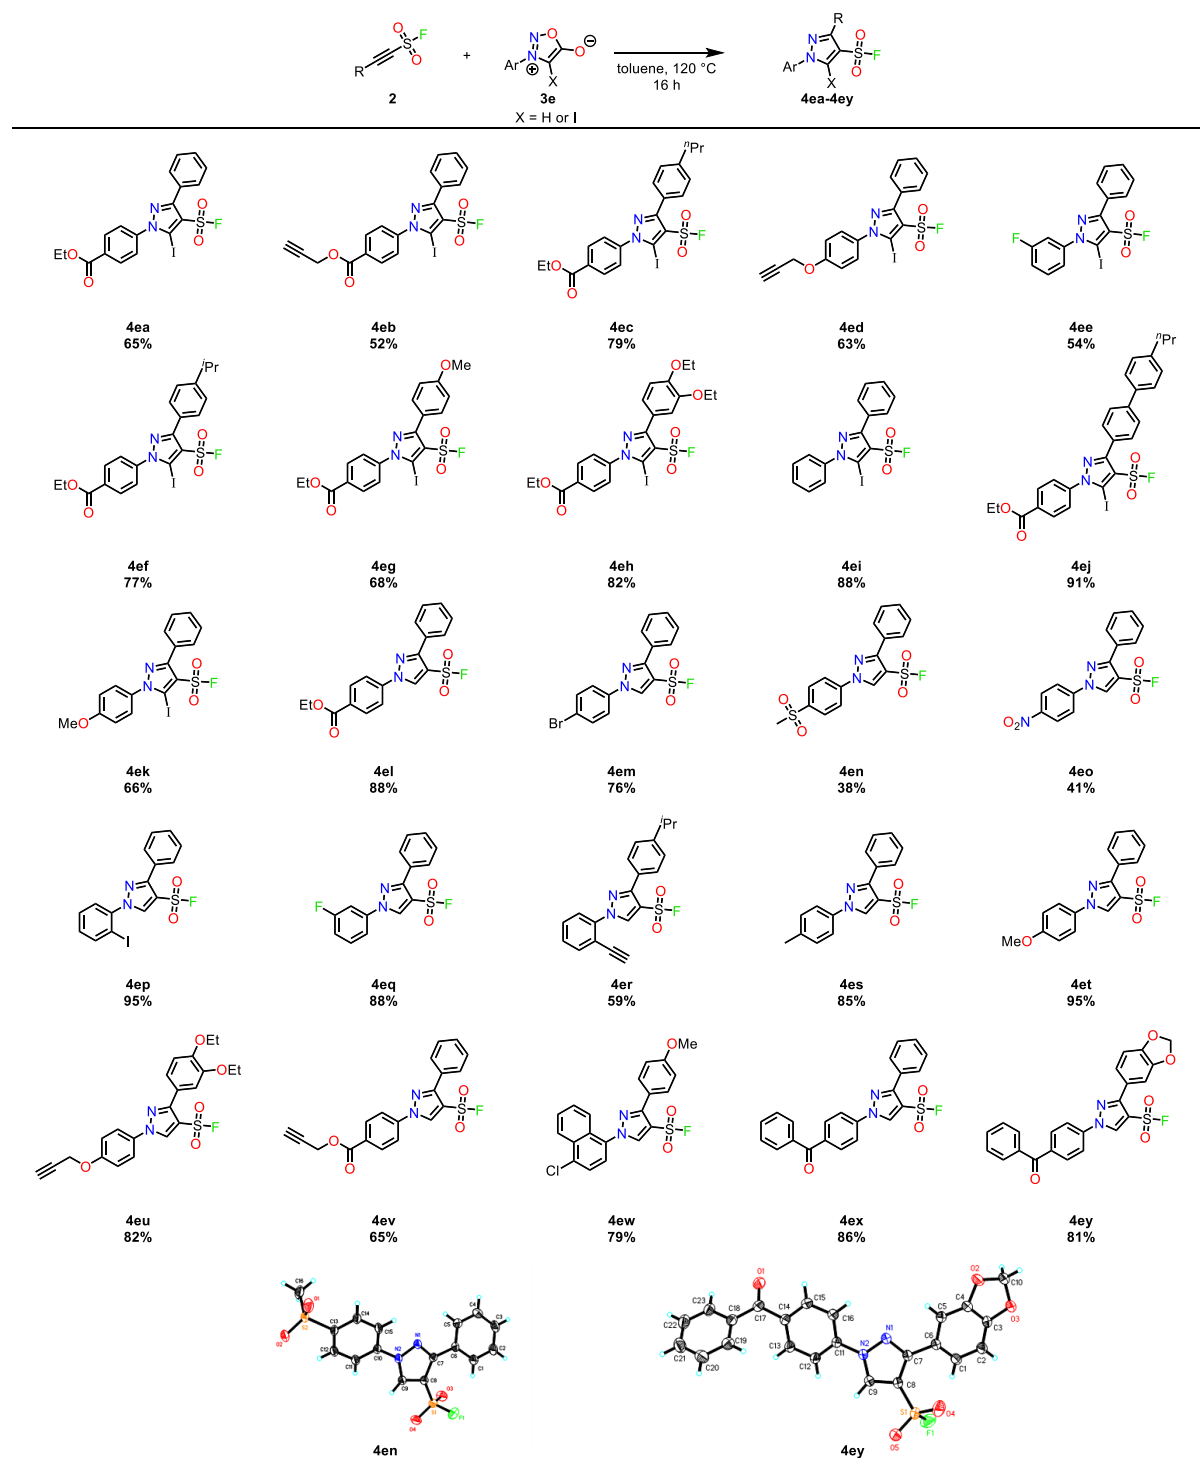

**Ethyl 4-(4-(fluorosulfonyl)-5-iodo-3-phenyl-1H-pyrazol-1-yl)benzoate (4ea)**

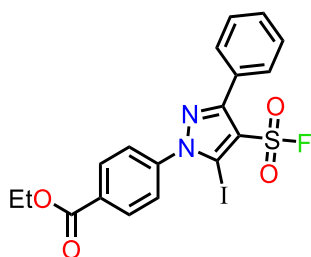

Following general procedure G, the title compound was isolated by flash column chromatography (0-30% EtOAc in petroleum ether) as a pale yellow solid (81.0 mg, 65%). **m.p.**; 137 - 138 °C; **<sup>1</sup>H NMR** (400 MHz, CDCl<sub>3</sub>) δ 8.26 (appt. d, *J* = 8.6 Hz, 2H), 7.74 – 7.63 (m, 4H), 7.52 – 7.44 (m, 3H), 4.45 (q, *J* = 7.1 Hz, 2H), 1.45 (t, *J* = 7.1 Hz, 3H); **<sup>13</sup>C NMR** (101 MHz, CDCl<sub>3</sub>) δ 165.3, 155.3, 142.7, 132.3, 130.8, 130.2, 129.6, 129.4, 128.5, 127.1, 119.6 (d, *J* = 32.5 Hz), 91.8, 61.8, 14.4; **<sup>19</sup>F NMR** (376 MHz, CDCl<sub>3</sub>) δ 72.2; **HRMS** (ESI<sup>+</sup>): calculated for C<sub>18</sub>H<sub>15</sub>FIN<sub>2</sub>O<sub>4</sub>S [M+H<sup>+</sup>]: *m/z* = 500.9776, *m/z* found 500.9775; **IR** *v*<sub>max</sub> (ATR)/cm<sup>-1</sup>: 3073, 3003, 1702, 1606, 1411, 1281.

**Prop-2-yn-1-yl 4-(4-(fluorosulfonyl)-5-iodo-3-phenyl-1H-pyrazol-1-yl)benzoate (4eb)**

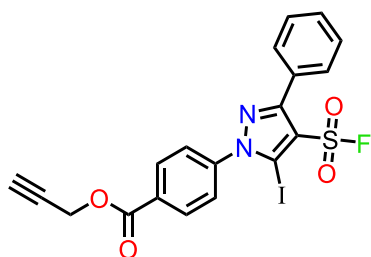

Following general procedure G (110 μmol of the required SASF), the title compound was isolated by flash column chromatography (0-10% EtOAc in petroleum ether) as a colourless oil (29.0 mg, 52%). **<sup>1</sup>H NMR** (400 MHz, CDCl<sub>3</sub>) δ 8.29 (appt. d, *J* = 8.0 Hz, 2H), 7.71–7.67 (m, 4H), 7.53 – 7.45 (m, 3H), 5.00 (d, *J* = 2.5 Hz, 2H), 2.57 (t, *J* = 2.5 Hz, 1H); **<sup>13</sup>C NMR** (101 MHz, CDCl<sub>3</sub>) δ 164.6, 155.4, 143.1, 131.2, 131.1, 130.3, 129.6, 129.5, 128.5, 127.2, 119.8 (d, *J* = 32.5 Hz), 91.7, 75.7, 53.2; **<sup>19</sup>F NMR** (376 MHz, CDCl<sub>3</sub>) δ 72.2; **HRMS** (ESI<sup>+</sup>): calculated for C<sub>19</sub>H<sub>13</sub>FIN<sub>2</sub>O<sub>4</sub>S [M+H<sup>+</sup>]: *m/z* = 510.9619, *m/z* found 510.9638. **IR** *v*<sub>max</sub> (ATR)/cm<sup>-1</sup>: 3304, 2928, 1728, 1607, 1413, 1267.

**Ethyl 4-(4-(fluorosulfonyl)-5-iodo-3-(4-propylphenyl)-1H-pyrazol-1-yl)benzoate (4ec)**

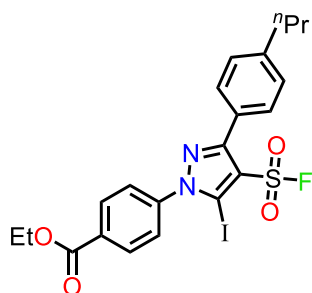

Following general procedure G, the title compound was isolated by flash column chromatography (0-8% EtOAc in petroleum ether) as white solid (43.0 mg, 79%). **m.p.** 139 - 140 °C; **<sup>1</sup>H NMR** (400 MHz, CDCl<sub>3</sub>) δ 8.25 (appt. d, *J* = 8.7 Hz, 2H), 7.67 (appt. d, *J* = 8.7 Hz, 2H), 7.60 (appt. d, *J* = 8.2 Hz, 2H), 7.29 (appt. d, *J* = 8.3 Hz, 2H), 4.45 (q, *J* = 7.1 Hz, 2H), 2.68 – 2.63 (m, 2H), 1.74 – 1.63 (m, 2H), 1.45 (t, *J* = 7.1 Hz, 3H), 0.97 (t, *J* = 7.3 Hz, 3H); **<sup>13</sup>C NMR** (126 MHz, CDCl<sub>3</sub>) δ 165.4, 155.4, 145.1, 142.8, 132.3, 130.8, 129.3, 128.7, 127.1, 126.9, 119.4 (d, *J* = 32.4 Hz), 91.6, 61.8, 38.0, 24.4, 14.4, 14.0; **<sup>19</sup>F NMR** (471 MHz, CDCl<sub>3</sub>) δ 72.1; **HRMS** (ESI<sup>+</sup>): calculated for C<sub>21</sub>H<sub>21</sub>FIN<sub>2</sub>O<sub>4</sub>S [M+H<sup>+</sup>]: *m/z* = 543.0245, *m/z* found 543.0248; **IR** *v*<sub>max</sub> (ATR)/cm<sup>-1</sup>: 2989, 2875, 1714, 1606, 1456, 1410, 1280, 1220.

**5-Iodo-3-phenyl-1-(4-(prop-2-yn-1-yloxy)phenyl)-1H-pyrazole-4-sulfonyl fluoride (4ed)**

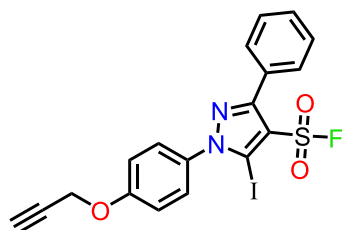

Following general procedure G, the title compound was isolated by flash column chromatography (0-15% EtOAc in petroleum ether) as an off-white solid (88.0 mg, 63%). **<sup>1</sup>H NMR** (400 MHz, CDCl<sub>3</sub>) δ 7.71 – 7.66 (m, 2H), 7.52 – 7.43 (m, 5H), 7.14 (appt. d, *J* = 9.0 Hz, 2H), 4.79 (d, *J* = 2.4 Hz, 2H), 2.59 (t, *J* = 2.4 Hz, 1H); **<sup>13</sup>C NMR** (101 MHz, CDCl<sub>3</sub>) δ 158.9, 154.9, 133.2, 130.1, 129.9, 129.5, 128.5, 118.6 (d, *J* = 32.4 Hz), 115.6, 92.8, 77.8, 76.5, 56.3; **<sup>19</sup>F NMR** (376 MHz, CDCl<sub>3</sub>) δ 72.2; **HRMS** (ESI<sup>+</sup>): calculated for C<sub>18</sub>H<sub>13</sub>FIN<sub>2</sub>O<sub>3</sub>S [M+H<sup>+</sup>]: *m/z* = 482.9670, *m/z* found 482.9670; **IR** *v*<sub>max</sub> (ATR)/cm<sup>-1</sup>: 3287, 3073, 2926, 1601, 1513, 1409, 1218.

### 1-(3-Fluorophenyl)-5-iodo-3-phenyl-1H-pyrazole-4-sulfonyl fluoride (4ee)

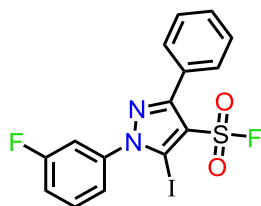

Following general procedure G, the title compound was isolated by flash column chromatography (0-8% EtOAc in petroleum ether) as a pale yellow solid (24.0 mg, 54%). **m.p.** 119 - 120 °C; **<sup>1</sup>H NMR** (400 MHz, CDCl<sub>3</sub>) δ 7.70 – 7.66 (m, 2H), 7.56 (tdd, *J* = 8.1, 5.9, 0.6 Hz, 1H), 7.53 – 7.44 (m, 3H), 7.41 – 7.37 (m, 1H), 7.35 – 7.27 (m, 2H); **<sup>13</sup>C NMR** (126 MHz, CDCl<sub>3</sub>) δ 162.6 (d, *J* = 250.3 Hz), 155.2, 140.5 (d, *J* = 9.9 Hz), 130.8 (d, *J* = 8.9 Hz), 130.2, 129.6, 129.4, 128.5, 123.1 (d, *J* = 3.5 Hz), 119.4 (d, *J* = 32.4 Hz), 117.8 (d, *J* = 20.9 Hz), 115.1 (d, *J* = 24.7 Hz), 92.1; **<sup>19</sup>F NMR** (471 MHz, CDCl<sub>3</sub>) δ 72.2, -109.5 – -109.6 (m); **HRMS** (ESI<sup>+</sup>): calculated for C<sub>15</sub>H<sub>10</sub>F<sub>2</sub>IN<sub>2</sub>O<sub>2</sub>S [M+H<sup>+</sup>]: *m/z* = 446.9470, *m/z* found 446.9470; **IR** *v*<sub>max</sub> (ATR)/cm<sup>-1</sup>: 2981, 2865, 1600, 1416, 1222, 1055, 766.

### Ethyl 4-(4-(fluorosulfonyl)-5-iodo-3-(4-isopropylphenyl)-1H-pyrazol-1-yl)benzoate (4ef)

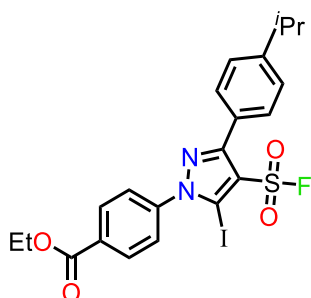

Following general procedure G, the title compound was isolated by flash column chromatography (0-10% EtOAc in petroleum ether) as a pale yellow solid (42.0 mg, 77%). **m.p.** 121 - 122 °C; **<sup>1</sup>H NMR** (400 MHz, CDCl<sub>3</sub>) δ 8.25 (appt. d, *J* = 8.8 Hz, 2H), 7.67 (appt. d, *J* = 8.8 Hz, 2H), 7.62 (appt. d, *J* = 8.2 Hz, 2H), 7.34 (appt. d, *J* = 8.5 Hz, 2H), 4.45 (q, *J* = 7.1 Hz, 2H), 2.98 (hept, *J* = 6.8 Hz, 1H), 1.45 (t, *J* = 7.1 Hz, 3H), 1.29 (d, *J* = 6.9 Hz, 6H); **<sup>13</sup>C NMR** (126 MHz, CDCl<sub>3</sub>) δ 165.4, 155.4, 151.2, 142.8, 132.3, 130.8, 129.4, 127.1, 127.0, 126.7, 119.4 (d, *J* = 32.3 Hz), 91.6, 61.8, 34.2, 24.0, 14.4; **<sup>19</sup>F NMR** (376 MHz, CDCl<sub>3</sub>) δ 72.1; **HRMS** (ESI<sup>+</sup>): calculated for C<sub>21</sub>H<sub>21</sub>FIN<sub>2</sub>O<sub>4</sub>S [M+H<sup>+</sup>]: *m/z* = 543.0245, *m/z* found 543.0246; **IR** *v*<sub>max</sub> (ATR)/cm<sup>-1</sup>: 2960, 2927, 1723, 1607, 1462, 1413, 1274.

**Ethyl 4-(4-(fluorosulfonyl)-5-iodo-3-(4-methoxyphenyl)-1H-pyrazol-1-yl)benzoate (4eg)**

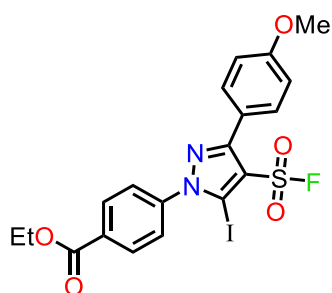

Following general procedure G, the title compound was isolated by flash column chromatography (0-12% EtOAc in petroleum ether) as a pale yellow solid (36.0 mg, 68%). **m.p.** 154 - 156 °C; **<sup>1</sup>H NMR** (400 MHz, CDCl<sub>3</sub>) δ 8.25 (appt. d, *J* = 8.8 Hz, 2H), 7.69 – 7.61 (m, 4H), 7.00 (appt. d, *J* = 8.9 Hz, 2H), 4.45 (q, *J* = 7.1 Hz, 2H), 3.87 (s, 3H), 1.45 (t, *J* = 7.1 Hz, 3H); **<sup>13</sup>C NMR** (126 MHz, CDCl<sub>3</sub>) δ 165.4, 161.2, 155.1, 142.8, 132.3, 130.8, 130.8, 127.1, 121.9, 119.2 (d, *J* = 32.3 Hz), 114.0, 91.7, 61.8, 55.5, 14.4; **<sup>19</sup>F NMR** (471 MHz, CDCl<sub>3</sub>) δ 72.1; **HRMS** (ESI<sup>+</sup>): calculated for C<sub>19</sub>H<sub>17</sub>FIN<sub>2</sub>O<sub>5</sub>S [M+H<sup>+</sup>]: *m/z* = 530.9881, *m/z* found 500.9884; **IR** *v*<sub>max</sub> (ATR)/cm<sup>-1</sup>: 2982, 2832, 1714, 1612, 1462, 1412, 1280.

**Ethyl 4-(3-(3,4-diethoxyphenyl)-4-(fluorosulfonyl)-5-iodo-1H-pyrazol-1-yl)benzoate (4eh)**

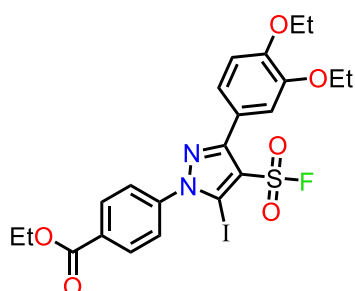

Following general procedure G, the title compound was isolated by flash column chromatography (0-12% EtOAc in petroleum ether) as an off-white solid (48.0 mg, 82%). **m.p.** 127 - 128°C; **<sup>1</sup>H NMR** (400 MHz, CDCl<sub>3</sub>) δ 8.25 (appt. d, *J* = 8.3 Hz, 2H), 7.66 (appt. d, *J* = 8.3 Hz, 2H), 7.26 (appt. d, *J* = 8.4 Hz, 2H), 6.95 (d, *J* = 8.7 Hz, 1H), 4.45 (q, *J* = 7.1 Hz, 2H), 4.20 – 4.11 (m, *J* = 6.9, 4.5 Hz, 4H), 1.52 – 1.41 (m, 9H); **<sup>13</sup>C NMR** (126 MHz, CDCl<sub>3</sub>) δ 165.4, 155.1, 150.5, 148.4, 142.8, 132.3, 130.8, 127.2, 122.4, 121.9, 119.2 (d, *J* = 32.4 Hz), 114.4, 112.7, 91.7, 64.8, 64.6, 61.8, 14.9, 14.9, 14.4; **<sup>19</sup>F NMR** (376 MHz, CDCl<sub>3</sub>) δ 71.8; **HRMS** (ESI<sup>+</sup>): calculated for C<sub>22</sub>H<sub>23</sub>FIN<sub>2</sub>O<sub>6</sub>S [M+H<sup>+</sup>]: *m/z* = 589.0300, *m/z* found 589.0301; **IR** *v*<sub>max</sub> (ATR)/cm<sup>-1</sup>: 2981, 2935, 1716, 1607, 1472, 1420, 1294.

#### 5-Iodo-1,3-diphenyl-1H-pyrazole-4-sulfonyl fluoride (4ei)

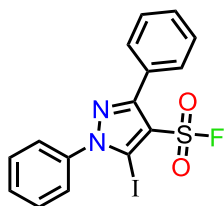

Following general procedure G (250  $\mu\text{mol}$  of SASF), the title compound was isolated by flash column chromatography (0-10% EtOAc in petroleum ether) as a white solid (94.0 mg, 88%). **m.p.** 159 - 160  $^{\circ}\text{C}$ ;  **$^1\text{H NMR}$**  (400 MHz,  $\text{CDCl}_3$ )  $\delta$  7.72 – 7.67 (m, 2H), 7.61 – 7.53 (m, 5H), 7.51 – 7.44 (m, 3H);  **$^{13}\text{C NMR}$**  (126 MHz,  $\text{CDCl}_3$ )  $\delta$  155.0, 139.5, 130.5, 130.1, 129.9, 129.5, 129.5, 128.7, 128.5, 127.1, 126.8, 118.9 (d,  $J = 32.4$  Hz), 92.2;  **$^{19}\text{F NMR}$**  (471 MHz,  $\text{CDCl}_3$ )  $\delta$  72.2; **HRMS** (ESI $^+$ ): calculated for  $\text{C}_{15}\text{H}_{11}\text{FIN}_2\text{O}_2\text{S}$  [ $\text{M}+\text{H}^+$ ]:  $m/z = 428.9564$ ,  $m/z$  found 428.9565; **IR**  $\nu_{\text{max}}$  (ATR)/ $\text{cm}^{-1}$ : 3075, 2925, 1494, 1468, 1417, 1228.

#### Ethyl 4-(4-(fluorosulfonyl)-5-iodo-3-(4'-propyl-[1,1'-biphenyl]-4-yl)-1H-pyrazol-1-yl)benzoate (4ej)

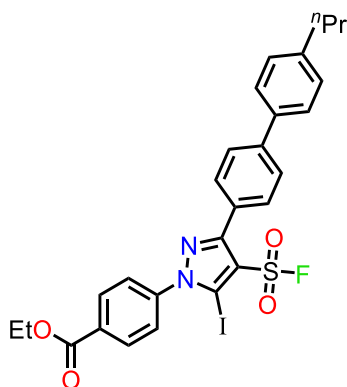

Following general procedure G, the title compound was isolated by flash column chromatography (0-8% EtOAc in petroleum ether) as a pale yellow solid (56.0 mg, 91%). **m.p.** 128 - 129  $^{\circ}\text{C}$ ;  **$^1\text{H NMR}$**  (400 MHz,  $\text{CDCl}_3$ )  $\delta$  8.27 (appt. d,  $J = 8.8$  Hz, 2H), 7.77 (appt. d,  $J = 8.6$  Hz, 2H), 7.72 – 7.67 (m, 4H), 7.57 (appt. d,  $J = 8.3$  Hz, 2H), 7.28 (appt. d,  $J = 8.4$  Hz, 2H), 4.46 (q,  $J = 7.1$  Hz, 2H), 2.69 – 2.62 (m, 2H), 1.75 – 1.65 (m, 2H), 1.45 (t,  $J = 7.1$  Hz, 3H), 0.99 (t,  $J = 7.3$  Hz, 3H);  **$^{13}\text{C NMR}$**  (126 MHz,  $\text{CDCl}_3$ )  $\delta$  165.4, 155.1, 143.0, 142.7, 142.6, 137.7, 132.3, 130.8, 129.8, 129.1, 128.1, 127.2, 127.1, 127.0, 119.5 (d,  $J = 32.5$  Hz), 91.8, 61.8, 37.9, 24.7, 14.4, 14.0;  **$^{19}\text{F NMR}$**  (471 MHz,  $\text{CDCl}_3$ )  $\delta$  72.2; **HRMS** (ESI $^+$ ): calculated for  $\text{C}_{27}\text{H}_{25}\text{FIN}_2\text{O}_4\text{S}$  [ $\text{M}+\text{H}^+$ ]:  $m/z = 619.0558$ ,  $m/z$  found 619.0556; **IR**  $\nu_{\text{max}}$  (ATR)/ $\text{cm}^{-1}$ : 2960, 2926, 1705, 1607, 1464, 1409, 1279, 1218, 772.

#### 5-Iodo-1-(4-methoxyphenyl)-3-phenyl-1H-pyrazole-4-sulfonyl fluoride (4ek)

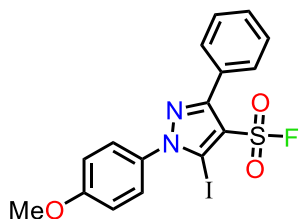

Following general procedure G (250  $\mu$ mol of the required SASF), the title compound was isolated by flash column chromatography (0-10% EtOAc in petroleum ether) as a white solid (75.0 mg, 66%). **m.p.** 146 - 148 °C; **<sup>1</sup>H NMR** (400 MHz, CDCl<sub>3</sub>)  $\delta$  7.71 – 7.66 (m, 2H), 7.52 – 7.43 (m, 5H), 7.05 (appt. d,  $J$  = 9.0 Hz, 2H), 3.90 (s, 3H); **<sup>13</sup>C NMR** (126 MHz, CDCl<sub>3</sub>)  $\delta$  160.9, 154.8, 132.4, 130.0, 129.9, 129.4, 128.4, 118.4 (d,  $J$  = 32.2 Hz), 114.5 (d,  $J$  = 9.9 Hz), 93.0, 55.8; **<sup>19</sup>F NMR** (471 MHz, CDCl<sub>3</sub>)  $\delta$  72.2; **HRMS** (ESI<sup>+</sup>): calculated for C<sub>16</sub>H<sub>13</sub>FIN<sub>2</sub>O<sub>3</sub>S [M+H<sup>+</sup>]:  $m/z$  = 458.9670,  $m/z$  found 458.9670; **IR**  $\nu_{\max}$  (ATR)/cm<sup>-1</sup>: 2925, 2851, 1510, 1417, 1254.

#### Ethyl 4-(4-(fluorosulfonyl)-3-phenyl-1H-pyrazol-1-yl)benzoate (4el)

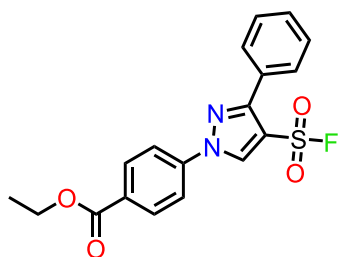

Following general procedure G, the title compound was isolated by flash column chromatography (0-30% EtOAc in petroleum ether) as a white solid (82.0 mg, 88%). **m.p.** 106 - 108 °C; **<sup>1</sup>H NMR** (400 MHz, CDCl<sub>3</sub>)  $\delta$  8.71 (d,  $J$  = 1.1 Hz, 1H), 8.24 (appt. d,  $J$  = 9.0 Hz, 2H), 7.93 – 7.86 (m, 4H), 7.55 – 7.49 (m, 3H), 4.44 (q,  $J$  = 7.1 Hz, 2H), 1.44 (t,  $J$  = 7.1 Hz, 3H); **<sup>13</sup>C NMR** (101 MHz, CDCl<sub>3</sub>)  $\delta$  165.3, 152.2, 141.3, 133.9, 131.4, 130.6, 130.2, 129.1, 128.7, 119.2, 115.1 (d,  $J$  = 33.3 Hz), 61.5, 14.3; **<sup>19</sup>F NMR** (376 MHz, CDCl<sub>3</sub>)  $\delta$  69.8; **HRMS** (ESI<sup>+</sup>): calculated for C<sub>18</sub>H<sub>16</sub>FN<sub>2</sub>O<sub>4</sub>S [M+H<sup>+</sup>]:  $m/z$  = 375.0809,  $m/z$  found 375.0806; **IR**  $\nu_{\max}$  (ATR)/cm<sup>-1</sup>: 3107, 2977, 2927, 1699, 1608, 1521, 1410, 1280, 1211, 764.

#### 1-(4-Bromophenyl)-3-phenyl-1H-pyrazole-4-sulfonyl fluoride (4em)

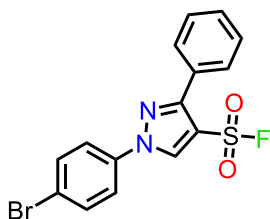

Following general procedure G, the title compound was isolated by flash column chromatography (0-10% EtOAc in petroleum ether) as an off white solid (72.0 mg, 76%). **m.p.** 133 - 135 °C; **<sup>1</sup>H NMR** (400 MHz, CDCl<sub>3</sub>) δ 8.61 (d, *J* = 1.1 Hz, 1H), 7.90 – 7.86 (m, 2H), 7.68 (s, 4H), 7.54 – 7.49 (m, 3H); **<sup>13</sup>C NMR** (101 MHz, CDCl<sub>3</sub>) δ 152.1, 137.5, 133.8, 133.2, 130.3, 129.3, 128.9, 122.6, 121.4, 114.8 (d, *J* = 33.3 Hz); **<sup>19</sup>F NMR** (376 MHz, CDCl<sub>3</sub>) δ 69.9 (d, *J* = 16.0 Hz); **HRMS** (ESI<sup>+</sup>): calculated for C<sub>15</sub>H<sub>11</sub>BrFN<sub>2</sub>O<sub>2</sub>S [M+H<sup>+</sup>]: *m/z* = 380.9703, *m/z* found 380.9695; **IR** ν<sub>max</sub> (ATR)/cm<sup>-1</sup>: 3137, 2965, 2865, 1505, 1402, 1207, 1060, 764.

#### 1-(4-(Methylsulfonyl)phenyl)-3-phenyl-1H-pyrazole-4-sulfonyl fluoride (4en)

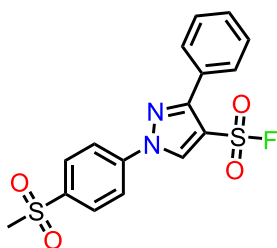

Following general procedure G, the title compound was isolated by flash column chromatography (0-10% EtOAc in petroleum ether) as a white solid (36.0 mg, 38%). **m.p.** 202 - 204 °C; **<sup>1</sup>H NMR** (500 MHz, CDCl<sub>3</sub>) δ 8.76 (d, *J* = 0.9 Hz, 1H), 8.15 (appt. d, *J* = 8.9 Hz, 2H), 8.04 (appt. d, *J* = 8.9 Hz, 2H), 7.92 – 7.87 (m, 2H), 7.55 – 7.51 (m, 3H), 3.13 (s, 3H); **<sup>13</sup>C NMR** (126 MHz, CDCl<sub>3</sub>) δ 152.7, 142.1, 140.6, 134.2 (d, *J* = 2.4 Hz), 130.6, 129.7, 129.0, 128.9, 128.8, 120.3, 115.9 (d, *J* = 33.7 Hz), 44.7; **<sup>19</sup>F NMR** (376 MHz, CDCl<sub>3</sub>) δ 69.8. **HRMS** (ESI<sup>+</sup>): calculated for C<sub>16</sub>H<sub>14</sub>FN<sub>2</sub>O<sub>4</sub>S<sub>2</sub> [M+H<sup>+</sup>]: *m/z* = 381.0374, *m/z* found 381.0371; **IR** ν<sub>max</sub> (ATR)/cm<sup>-1</sup>: 3140, 2926, 1598, 1521, 1393, 1298, 1213, 1147.



#### 1-(4-Nitrophenyl)-3-phenyl-1H-pyrazole-4-sulfonyl fluoride (4eo)

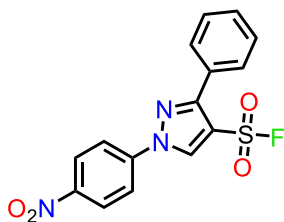

Following general procedure G, the title compound was isolated by flash column chromatography (0-10% EtOAc in petroleum ether) as a pale yellow solid (36.0 mg, 41%). **m.p.** 200 - 202 °C; **<sup>1</sup>H NMR** (400 MHz, CDCl<sub>3</sub>) δ 8.76 (d, *J* = 1.2 Hz, 1H), 8.45 (appt. d, *J* = 9.4 Hz, 2H), 8.02 (appt. d, *J* = 9.4 Hz, 2H), 7.93 – 7.87 (m, 2H), 7.56 – 7.51 (m, 3H); **<sup>13</sup>C NMR** (101 MHz, CDCl<sub>3</sub>) δ 152.9, 147.3, 142.6, 134.3, 130.6, 129.0, 128.9, 128.8, 125.8, 120.0, 116.2 (d, *J* = 33.8 Hz); **<sup>19</sup>F NMR** (376 MHz, CDCl<sub>3</sub>) δ 69.7; **HRMS** (ESI<sup>+</sup>): calculated for C<sub>15</sub>H<sub>11</sub>FN<sub>3</sub>O<sub>4</sub>S [M+H<sup>+</sup>]: *m/z* = 348.0449, *m/z* found 348.0439; **IR** *v*<sub>max</sub> (ATR)/cm<sup>-1</sup>: 3142, 2926, 2853, 1595, 1514, 1398, 1338, 1203;

#### 1-(2-Iodophenyl)-3-phenyl-1H-pyrazole-4-sulfonyl fluoride (4ep)

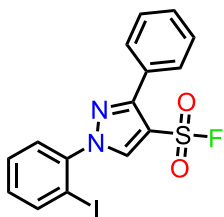

Following general procedure G, the title compound was isolated by flash column chromatography (0-10% EtOAc in petroleum ether) as a white solid (102 mg, 95%). **m.p.** 85 - 87 °C; **<sup>1</sup>H NMR** (400 MHz, CDCl<sub>3</sub>) δ 8.44 (s, 1H), 8.03 (appt. d, *J* = 7.9 Hz, 1H), 7.94 – 7.88 (m, 2H), 7.56 – 7.47 (m, 5H), 7.30 – 7.24 (m, 1H) **<sup>13</sup>C NMR** (101 MHz, CDCl<sub>3</sub>) δ 151.7, 141.6, 140.6, 138.3 (d, *J* = 2.4 Hz), 131.8, 130.1, 129.6, 129.4, 128.9, 128.8, 128.0, 113.7 (d, *J* = 33.1 Hz), 93.9; **<sup>19</sup>F NMR** (376 MHz, CDCl<sub>3</sub>) δ 70.1; **HRMS** (ESI<sup>+</sup>): calculated for C<sub>15</sub>H<sub>11</sub>FIN<sub>2</sub>O<sub>2</sub>S [M+H<sup>+</sup>]: *m/z* = 428.9564, *m/z* found 428.9564; **IR** *v*<sub>max</sub> (ATR)/cm<sup>-1</sup>: 3126, 1504, 1448, 1402, 1203, 761.

#### 1-(3-Fluorophenyl)-3-phenyl-1H-pyrazole-4-sulfonyl fluoride (4eq)

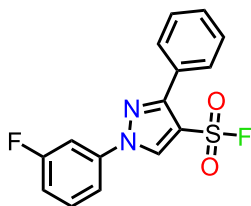

Following general procedure G, the title compound was isolated by flash column chromatography (0-10% EtOAc in petroleum ether) as a white solid (70.0 mg, 88%). **m.p.** 105 - 107 °C; **<sup>1</sup>H NMR** (400 MHz, CDCl<sub>3</sub>) δ 8.63 (d, *J* =

1.1 Hz, 1H), 7.92 – 7.86 (m, 2H), 7.59 (ddt,  $J = 8.5, 3.5, 1.6$  Hz, 1H), 7.56 – 7.49 (m, 5H), 7.20 – 7.14 (m, 1H);  $^{13}\text{C}$  NMR (101 MHz,  $\text{CDCl}_3$ )  $\delta$  163.4 (d,  $J = 249.1$  Hz), 152.1, 139.7 (d,  $J = 10.2$  Hz), 134.0 (d,  $J = 2.5$  Hz), 131.5 (d,  $J = 9.0$  Hz), 130.3, 129.3, 128.9, 115.8 (d,  $J = 21.2$  Hz), 115.1 (d,  $J = 3.3$  Hz), 114.9 (d,  $J = 33.4$  Hz), 108.1 (d,  $J = 26.6$  Hz);  $^{19}\text{F}$  NMR (376 MHz,  $\text{CDCl}_3$ )  $\delta$  69.9, -109.2 (m); HRMS (ESI<sup>+</sup>): calculated for  $\text{C}_{15}\text{H}_{11}\text{F}_2\text{N}_2\text{O}_2\text{S}$  [ $\text{M}+\text{H}^+$ ]:  $m/z = 321.0504$ ,  $m/z$  found 321.0507; IR  $\nu_{\text{max}}$  (ATR)/ $\text{cm}^{-1}$ : 3142, 2964, 2923, 1606, 1504, 1407, 1209, 1056, 865, 766.

### 1-(2-Ethynylphenyl)-3-(4-isopropylphenyl)-1H-pyrazole-4-sulfonyl fluoride (4er)

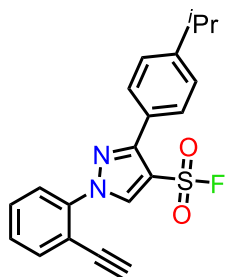

Following general procedure G, the title compound was isolated by flash column chromatography (0-10% EtOAc in petroleum ether) as a pale yellow (54.0 mg, 59%). **m.p.** 89 - 90 °C;  $^1\text{H}$  NMR (400 MHz,  $\text{CDCl}_3$ )  $\delta$  8.97 (d,  $J = 1.1$  Hz, 1H), 7.85 – 7.79 (m, 3H), 7.70 (dd,  $J = 7.8, 1.5$  Hz, 1H), 7.58 – 7.52 (appt. td,  $J = 7.6, 1.3$  Hz, 1H), 7.45 (appt. td,  $J = 7.6, 1.3$  Hz, 1H), 7.36 (appt. d,  $J = 8.1$  Hz, 2H), 3.42 (s, 1H), 2.99 (hept,  $J = 6.9$  Hz, 1H), 1.30 (d,  $J = 6.9$  Hz, 6H);  $^{13}\text{C}$  NMR (101 MHz,  $\text{CDCl}_3$ )  $\delta$  151.7, 151.1, 139.9, 137.6, 134.8, 130.4, 129.0, 128.8, 126.9, 126.9, 125.1, 115.7, 113.3 (d,  $J = 32.9$  Hz), 84.6, 79.2, 34.2, 24.0;  $^{19}\text{F}$  NMR (376 MHz,  $\text{CDCl}_3$ )  $\delta$  69.8; HRMS (ESI<sup>+</sup>): calculated for  $\text{C}_{20}\text{H}_{18}\text{FN}_2\text{O}_2\text{S}$  [ $\text{M}+\text{H}^+$ ]:  $m/z = 369.1068$ ,  $m/z$  found 369.1072; IR  $\nu_{\text{max}}$  (ATR)/ $\text{cm}^{-1}$ : 3280, 3136, 2970, 1506, 1406, 1206, 771.

### 3-Phenyl-1-(*p*-tolyl)-1H-pyrazole-4-sulfonyl fluoride (4es)

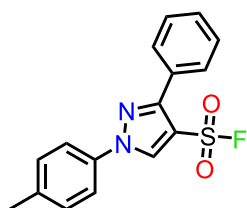

Following general procedure G, the title compound was isolated by flash column chromatography (0-10% EtOAc in petroleum ether) as a pale yellow solid (67.0 mg, 85%). **m.p.** 126 °C;  $^1\text{H}$  NMR (400 MHz,  $\text{CDCl}_3$ )  $\delta$  8.58 (s, 1H), 7.89 (dd,  $J = 6.6, 2.9$  Hz, 2H), 7.65 (d,  $J = 8.4$  Hz, 2H), 7.53 – 7.47 (m, 3H), 7.34 (d,  $J = 8.5$  Hz, 2H), 2.44 (s, 3H);  $^{13}\text{C}$  NMR (101 MHz,  $\text{CDCl}_3$ )  $\delta$  151.8, 139.1, 136.3, 128.9, 128.8, 120.0, 114.0 (d,  $J = 32.9$  Hz), 21.2;  $^{19}\text{F}$  NMR (376 MHz,  $\text{CDCl}_3$ )  $\delta$  70.1; HRMS (ESI<sup>+</sup>): calculated for  $\text{C}_{16}\text{H}_{14}\text{FN}_2\text{O}_2\text{S}$  [ $\text{M}+\text{H}^+$ ]:  $m/z = 317.0755$ ,  $m/z$  found 317.0754; IR  $\nu_{\text{max}}$  (ATR)/ $\text{cm}^{-1}$ : 3134, 2927, 2853, 1527, 1446, 1407, 1204, 752.

### 1-(4-Methoxyphenyl)-3-phenyl-1H-pyrazole-4-sulfonyl fluoride (4et)

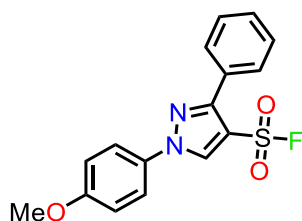

Following general procedure G, the title compound was isolated by flash column chromatography (0-20% EtOAc in petroleum ether) as a white solid (79.0 mg, 95%). **m.p.** 125 - 126 °C; **<sup>1</sup>H NMR** (400 MHz, CDCl<sub>3</sub>) δ 8.51 (d, *J* = 1.1 Hz, 1H), 7.91 – 7.86 (m, 2H), 7.67 (appt. d, *J* = 9.2 Hz, 2H), 7.53 – 7.47 (m, 3H), 7.04 (appt. d, *J* = 9.2 Hz, 2H); **<sup>13</sup>C NMR** (101 MHz, CDCl<sub>3</sub>) δ 159.9, 151.5, 133.6 (d, *J* = 2.2 Hz), 131.9, 129.9, 129.5, 128.7, 128.6, 121.6, 114.9, 113.6 (d, *J* = 32.6 Hz), 55.7; **<sup>19</sup>F NMR** (376 MHz, CDCl<sub>3</sub>) δ 70.2; **HRMS** (ESI<sup>+</sup>): calculated for C<sub>16</sub>H<sub>14</sub>FN<sub>2</sub>O<sub>3</sub>S [M+H<sup>+</sup>]: *m/z* = 333.0704, *m/z* found 333.0708; **IR** *v*<sub>max</sub> (ATR)/cm<sup>-1</sup>: 3114, 2971, 2939, 1522, 1397, 1204, 1018, 752.

### 3-(3,4-Diethoxyphenyl)-1-(4-(prop-2-yn-1-yloxy)phenyl)-1H-pyrazole-4-sulfonyl fluoride (4eu)

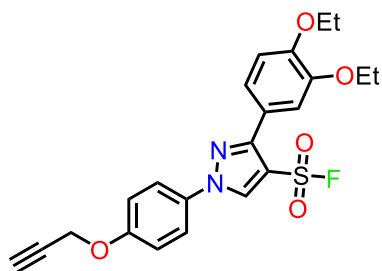

Following general procedure G, the title compound was isolated by flash column chromatography (0-10% EtOAc in petroleum ether) as a white solid (91.0 mg, 82%). **m.p.** 109 - 110 °C; **<sup>1</sup>H NMR** (400 MHz, CDCl<sub>3</sub>) δ 8.50 (d, *J* = 0.9 Hz, 1H), 7.69 (appt. d, *J* = 9.1 Hz, 2H), 7.49 – 7.44 (m, 3H), 7.12 (appt. d, *J* = 9.1 Hz, 2H), 6.98 (appt. d, *J* = 9.0 Hz, 1H), 4.77 (d, *J* = 2.4 Hz, 2H), 4.18 (qd, *J* = 7.0, 5.6 Hz, 5H), 2.59 – 2.56 (m, 1H), 1.49 (td, *J* = 7.0, 1.1 Hz, 6H); **<sup>13</sup>C NMR** (101 MHz, CDCl<sub>3</sub>) δ 157.8, 151.5, 150.4, 148.7, 133.9, 132.8, 122.1, 121.7, 116.1, 113.7, 113.4 (d, *J* = 32.6 Hz), 113.0, 78.0, 76.3, 64.8, 64.6, 56.3, 14.9, 14.9; **<sup>19</sup>F NMR** (376 MHz, CDCl<sub>3</sub>) δ 69.2; **HRMS** (ESI<sup>+</sup>): calculated for C<sub>22</sub>H<sub>22</sub>FN<sub>2</sub>O<sub>5</sub>S [M+H<sup>+</sup>]: *m/z* = 445.1228, *m/z* found 445.1228; **IR** *v*<sub>max</sub> (ATR)/cm<sup>-1</sup>: 3252, 3136, 1518, 1456, 1407, 1209, 761.

**Prop-2-yn-1-yl 4-(4-(fluorosulfonyl)-3-phenyl-1H-pyrazol-1-yl)benzoate (4ev)**

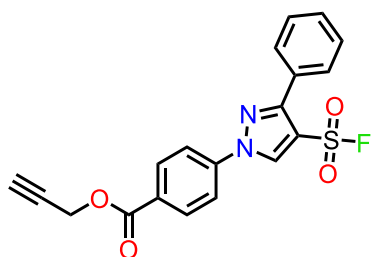

Following general procedure G, the title compound was isolated by flash column chromatography (0-10% EtOAc in petroleum ether) as a white solid (62.0 mg, 65%). **m.p.** 155 - 156 °C **<sup>1</sup>H NMR** (400 MHz, CDCl<sub>3</sub>) δ 8.72 (d, *J* = 1.0 Hz, 1H), 8.27 (d, *J* = 8.9 Hz, 2H), 7.95 – 7.85 (m, 4H), 7.56 – 7.49 (m, 3H), 4.98 (d, *J* = 2.5 Hz, 2H), 2.57 (t, *J* = 2.5 Hz, 1H); **<sup>13</sup>C NMR** (101 MHz, CDCl<sub>3</sub>) δ 164.7, 152.4, 141.8, 134.1 (d, *J* = 2.5 Hz), 131.9, 130.4, 129.6, 129.2, 128.9, 128.9, 119.5, 115.4 (d, *J* = 33.4 Hz), 75.6, 53.1; **<sup>19</sup>F NMR** (376 MHz, CDCl<sub>3</sub>) δ 69.9; **HRMS** (ESI<sup>+</sup>): calculated for C<sub>19</sub>H<sub>14</sub>FN<sub>2</sub>O<sub>4</sub>S [M+H<sup>+</sup>]: *m/z* = 385.0653, *m/z* found 385.0670. **IR** *v*<sub>max</sub> (ATR)/cm<sup>-1</sup>: 3262, 3142, 2133, 1719, 1608, 1529, 1404, 1273, 1204.

**1-(4-Chloronaphthalen-1-yl)-3-(4-methoxyphenyl)-1H-pyrazole-4-sulfonyl fluoride (4ew)**

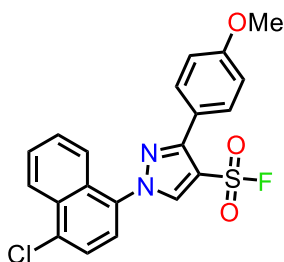

Following general procedure G, the title compound was isolated by flash column chromatography (0-10% EtOAc in petroleum ether) as a white solid (82.0 mg, 79%). **m.p.** 109 - 110 °C; **<sup>1</sup>H NMR** (400 MHz, CDCl<sub>3</sub>) δ 8.46 (d, *J* = 0.9 Hz, 1H), 8.44 – 8.39 (m, 1H), 7.89 (appt. d, *J* = 8.9 Hz, 2H), 7.85 – 7.81 (m, 1H), 7.77 – 7.65 (m, 3H), 7.55 (d, *J* = 7.9 Hz, 1H), 7.02 (appt. d, *J* = 9.0 Hz, 2H), 3.87 (s, 3H); **<sup>13</sup>C NMR** (101 MHz, CDCl<sub>3</sub>) δ 161.2, 151.8, 138.8 (d, *J* = 2.2 Hz), 134.7, 134.5, 131.6, 130.3, 129.5, 129.0, 128.5, 125.4, 125.3, 123.7, 123.0, 121.7, 114.3, 113.3 (d, *J* = 32.9 Hz), 55.5; **<sup>19</sup>F NMR** (376 MHz, CDCl<sub>3</sub>) δ 69.7; **HRMS** (ESI<sup>+</sup>): calculated for C<sub>20</sub>H<sub>15</sub>ClFN<sub>2</sub>O<sub>3</sub>S [M+H<sup>+</sup>]: *m/z* = 417.0470, *m/z* found 417.0468; **IR** *v*<sub>max</sub> (ATR)/cm<sup>-1</sup>: 3142, 3005, 2841, 1612, 1504, 1429, 1401, 1255, 1210, 959, 762.

### 1-(4-Benzoylphenyl)-3-phenyl-1H-pyrazole-4-sulfonyl fluoride (4ex)

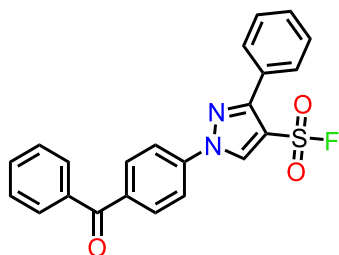

Following general procedure G, the title compound was isolated by flash column chromatography (0-10% EtOAc in petroleum ether) as a white solid (87.0 mg, 86%). **m.p.** 126 - 127 °C; **<sup>1</sup>H NMR** (400 MHz, CDCl<sub>3</sub>) δ 8.74 (d, *J* = 1.1 Hz, 1H), 8.01 (appt. d, *J* = 8.9 Hz, 2H), 7.95 – 7.88 (m, 4H), 7.85 – 7.81 (m, 2H), 7.68 – 7.62 (m, 1H), 7.56 – 7.50 (m, 5H); **<sup>13</sup>C NMR** (101 MHz, CDCl<sub>3</sub>) δ 195.2, 152.4, 141.0, 137.6, 137.2, 134.1 (d, *J* = 2.4 Hz), 133.1, 132.0, 130.4, 130.1, 129.2, 128.9, 128.9, 128.7, 119.4, 115.2 (d, *J* = 33.3 Hz); **<sup>19</sup>F NMR** (376 MHz, CDCl<sub>3</sub>) δ 69.9; **HRMS** (ESI<sup>+</sup>): calculated for C<sub>22</sub>H<sub>16</sub>FN<sub>2</sub>O<sub>3</sub>S [M+H<sup>+</sup>]: *m/z* = 407.0860, *m/z* found 407.0856; **IR** *v*<sub>max</sub> (ATR)/cm<sup>-1</sup>: 3139, 1662, 1602, 1524, 1395, 1215, 771.

### 3-(Benzo[d][1,3]dioxol-5-yl)-1-(4-benzoylphenyl)-1H-pyrazole-4-sulfonyl fluoride (4ey)

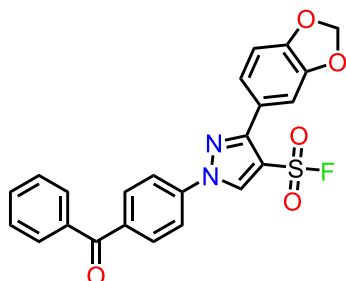

Following general procedure G, the title compound was isolated by flash column chromatography (0-10% EtOAc in petroleum ether) as a white solid (91.0 mg, 81%). **m.p.** 138 - 140 °C; **<sup>1</sup>H NMR** (400 MHz, CDCl<sub>3</sub>) δ 8.70 (d, *J* = 0.8 Hz, 1H), 8.00 (appt. d, *J* = 8.7 Hz, 2H), 7.91 (appt. d, *J* = 8.7 Hz, 2H), 7.85 – 7.80 (m, 2H), 7.68 – 7.62 (m, 1H), 7.58 – 7.51 (m, 2H), 7.44 (dd, *J* = 8.1, 1.8 Hz, 1H), 7.40 – 7.38 (m, 1H), 6.95 (d, *J* = 8.1 Hz, 1H), 6.06 (s, 2H); **<sup>13</sup>C NMR** (101 MHz, CDCl<sub>3</sub>) δ 195.2, 152.0, 149.5, 148.2, 141.0, 137.6, 137.2, 134.1 (d, *J* = 2.4 Hz), 133.1, 132.0, 130.1, 128.7, 123.4, 123.0, 119.3, 114.9 (d, *J* = 33.1 Hz), 109.1, 108.7, 101.7; **<sup>19</sup>F NMR** (376 MHz, CDCl<sub>3</sub>) δ 69.5; **HRMS** (ESI<sup>+</sup>): calculated for C<sub>23</sub>H<sub>16</sub>FN<sub>2</sub>O<sub>5</sub>S [M+H<sup>+</sup>]: *m/z* = 451.0758, *m/z* found 451.0759; **IR** *v*<sub>max</sub> (ATR)/cm<sup>-1</sup>: 3129, 1651, 1605, 1516, 1461, 1408, 1207, 763.

## Synthesis and experimental data for compounds 4fa-4fl

### General Procedure H

To a suspension of required substituted glycine **22** (100  $\mu$ mol) in acetic anhydride (1.00 mL) was added the required SASF **2** (120  $\mu$ mol) at room temperature. The reaction mixture was stirred at 120  $^{\circ}$ C for 0.5 h. The resultant solution was cooled to room temperature, the Ac<sub>2</sub>O was removed under a stream of nitrogen, and the crude product was purified by flash column chromatography to obtain the analytically pure product.

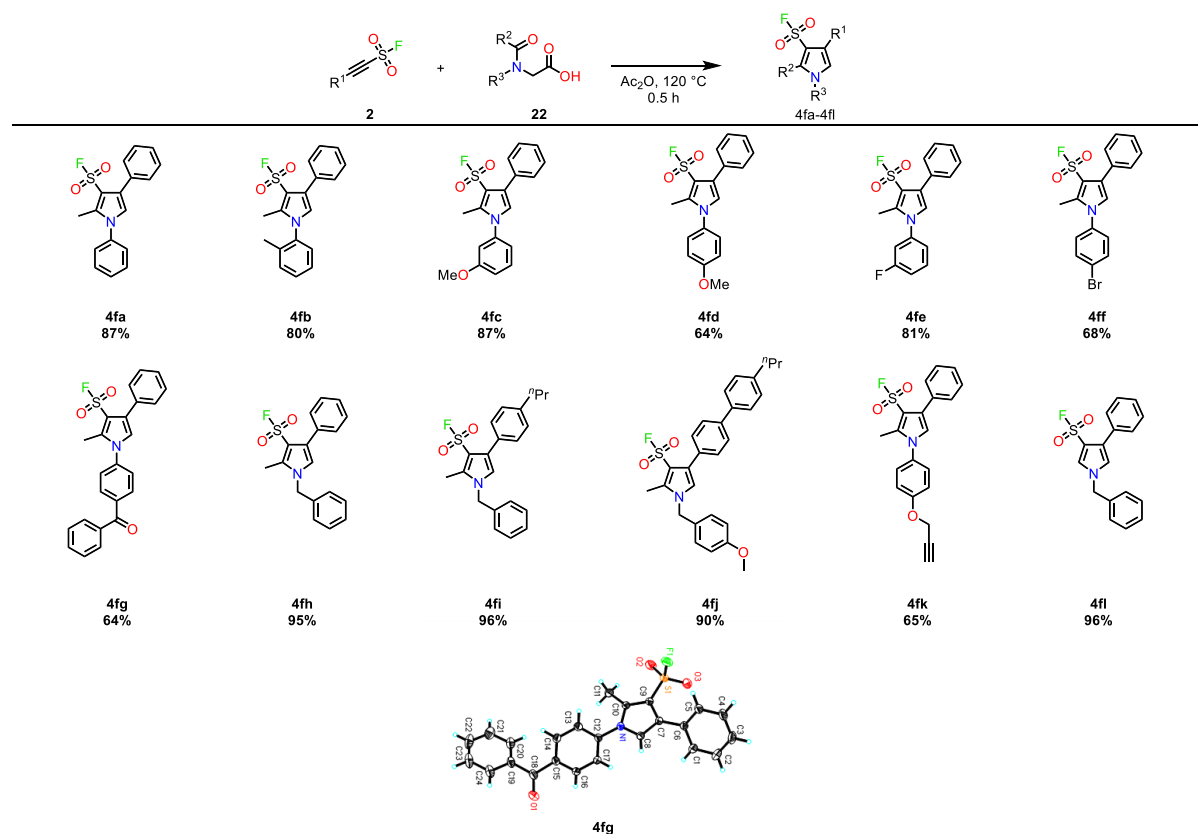

### 2-Methyl-1,4-diphenyl-1H-pyrrole-3-sulfonyl fluoride (4fa)

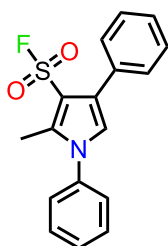

Following general procedure H, the title compound was isolated by flash column chromatography (0-6% EtOAc in petroleum ether) as a white solid (67.0 mg, 87%). **m.p.** 91 - 92  $^{\circ}$ C; **<sup>1</sup>H NMR** (400 MHz, CDCl<sub>3</sub>)  $\delta$  7.61 – 7.48 (m, 5H), 7.46 – 7.33 (m, 5H), 6.82 (s, 1H), 2.49 (d,  $J$  = 1.1 Hz, 3H); **<sup>13</sup>C NMR** (126 MHz, CDCl<sub>3</sub>)  $\delta$  137.9, 137.8 (d,  $J$  = 2.8 Hz), 132.3, 129.9, 129.5, 129.4, 128.3, 127.9, 126.6, 126.1, 122.3, 111.1 (d,  $J$  = 28.6 Hz), 12.4; **<sup>19</sup>F NMR** (471 MHz,

CDCl<sub>3</sub>) δ 74.0; **HRMS** (ESI<sup>+</sup>): calculated for C<sub>17</sub>H<sub>14</sub>FNO<sub>2</sub>SNa [M+Na<sup>+</sup>]: m/z = 338.0621, m/z found 338.0621; **IR** ν<sub>max</sub> (ATR)/cm<sup>-1</sup>: 3137, 2926, 1597, 1500, 1399, 1208, 758, 728.

#### 2-Methyl-4-phenyl-1-(*o*-tolyl)-1*H*-pyrrole-3-sulfonyl fluoride (4fb)

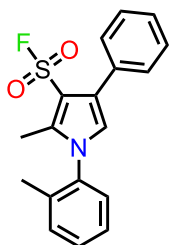

Following general procedure H, the title compound was isolated by flash column chromatography (0-6% EtOAc in petroleum ether) as a white solid (66.0 mg, 80%). **m.p.** 95 °C; **<sup>1</sup>H NMR** (400 MHz, CDCl<sub>3</sub>) δ 7.55 – 7.34 (m, 8H), 7.25 (s, 1H), 6.71 (s, 1H), 2.34 (s, 3H), 2.12 (s, 3H); **<sup>13</sup>C NMR** (126 MHz, CDCl<sub>3</sub>) δ 138.3 (d, *J* = 2.8 Hz), 136.8, 135.7, 132.4, 131.5, 130.0, 129.5, 128.3, 127.8, 127.8, 127.3, 126.1, 121.8, 110.3 (d, *J* = 28.6 Hz), 17.4, 11.9; **<sup>19</sup>F NMR** (471 MHz, CDCl<sub>3</sub>) δ 74.0; **HRMS** (ESI<sup>+</sup>): calculated for C<sub>18</sub>H<sub>16</sub>FNO<sub>2</sub>SNa [M+Na<sup>+</sup>]: m/z = 352.0778, m/z found 352.0775; **IR** ν<sub>max</sub> (ATR)/cm<sup>-1</sup>: 3127, 2926, 2853, 1498, 1397, 1212, 752.

#### 1-(3-Methoxyphenyl)-2-methyl-4-phenyl-1*H*-pyrrole-3-sulfonyl fluoride (4fc)

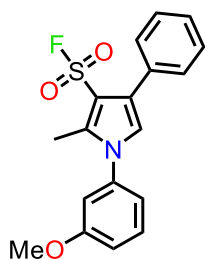

Following general procedure H, the title compound was isolated by flash column chromatography (0-10% EtOAc in petroleum ether) as a colourless oil (75.0 mg, 87%). **<sup>1</sup>H NMR** (400 MHz, CDCl<sub>3</sub>) δ 7.52 – 7.34 (m, 6H), 7.05 (ddd, *J* = 8.4, 2.5, 0.9 Hz, 1H), 6.93 (ddd, *J* = 7.8, 2.0, 0.9 Hz, 1H), 6.87 (t, *J* = 2.2 Hz, 1H), 6.82 (s, 1H), 3.88 (s, 3H), 2.50 (d, *J* = 1.0 Hz, 3H); **<sup>13</sup>C NMR** (126 MHz, CDCl<sub>3</sub>) δ 160.6, 138.9, 137.8 (d, *J* = 2.7 Hz), 132.3, 130.6, 129.5, 128.3, 127.9, 126.1, 122.2, 118.8, 114.9, 112.6, 111.1 (d, *J* = 28.5 Hz), 55.8, 12.5; **<sup>19</sup>F NMR** (471 MHz, CDCl<sub>3</sub>) δ 74.0; **HRMS** (ESI<sup>+</sup>): calculated for C<sub>18</sub>H<sub>16</sub>FNO<sub>3</sub>SNa [M+Na<sup>+</sup>]: m/z = 368.0727, m/z found 368.0715; **IR** ν<sub>max</sub> (ATR)/cm<sup>-1</sup>: 3135, 3064, 2932, 1605, 1496, 1399, 1200, 733.

#### 1-(4-Methoxyphenyl)-2-methyl-4-phenyl-1H-pyrrole-3-sulfonyl fluoride (4fd)

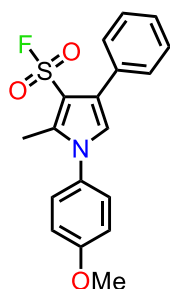

Following General general procedure H, the title compound was isolated by flash column chromatography (0-10% EtOAc in petroleum ether) as a white solid (67.0 mg, 64%). **m.p.** 106 - 108 °C; **<sup>1</sup>H NMR** (400 MHz, CDCl<sub>3</sub>) δ 7.53 – 7.47 (m, 2H), 7.46 – 7.33 (m, 3H), 7.26 (appt. d, *J* = 9.0 Hz, 2H), 7.04 (appt. d, *J* = 9.0 Hz, 2H), 6.78 (s, 1H), 3.89 (s, 3H), 2.46 (d, *J* = 1.0 Hz, 3H); **<sup>13</sup>C NMR** (126 MHz, CDCl<sub>3</sub>) δ 160.2, 138.1 (d, *J* = 2.6 Hz), 132.4, 130.6, 129.5, 128.3, 127.8, 125.8, 122.5, 114.9, 110.6 (d, *J* = 28.5 Hz), 55.8, 12.4; **<sup>19</sup>F NMR** (471 MHz, CDCl<sub>3</sub>) δ 74.0; **HRMS** (ESI<sup>+</sup>): calculated for C<sub>18</sub>H<sub>16</sub>FNO<sub>3</sub>SNa [M+Na<sup>+</sup>]: *m/z* = 368.0727, *m/z* found 368.0729; **IR** *v*<sub>max</sub> (ATR)/cm<sup>-1</sup>: 3149, 2926, 2853, 1515, 1398, 1250, 1205, 1027, 752.

#### 1-(3-Fluorophenyl)-2-methyl-4-phenyl-1H-pyrrole-3-sulfonyl fluoride (4fe)

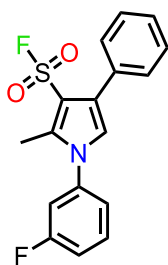

Following general procedure H, the title compound was isolated by flash column chromatography (0-6% EtOAc in petroleum ether) as a white solid (91.0 mg, 81%). **m.p.** 84 - 86 °C; **<sup>1</sup>H NMR** (400 MHz, CDCl<sub>3</sub>) δ 7.60 – 7.45 (m, 3H), 7.45 – 7.35 (m, 3H), 7.28 – 7.22 (m, 1H), 7.19 – 7.15 (m, 1H), 7.11 (appt. dt, *J* = 8.8, 2.2 Hz, 1H), 6.81 (s, 1H), 2.51 (d, *J* = 1.1 Hz, 3H); **<sup>13</sup>C NMR** (126 MHz, CDCl<sub>3</sub>) δ 163.0 (d, *J* = 250.4 Hz), 139.2 (d, *J* = 9.7 Hz), 137.6 (d, *J* = 3.0 Hz), 132.1, 131.2 (d, *J* = 9.0 Hz), 129.5, 128.3, 128.0, 126.5, 122.5 (d, *J* = 3.4 Hz), 122.0 (d, *J* = 1.4 Hz), 116.6 (d, *J* = 21.9 Hz), 114.4 (d, *J* = 23.7 Hz), 111.8 (d, *J* = 28.8 Hz), 12.4; **<sup>19</sup>F NMR** (471 MHz, CDCl<sub>3</sub>) δ 73.9, -109.5 – -109.6 (m); **HRMS** (ESI<sup>+</sup>): calculated for C<sub>17</sub>H<sub>13</sub>F<sub>2</sub>NO<sub>2</sub>SNa [M+Na<sup>+</sup>]: *m/z* = 356.0527, *m/z* found 356.0531; **IR** *v*<sub>max</sub> (ATR)/cm<sup>-1</sup>: 3135, 2926, 1599, 1495, 1399, 1216, 876, 759, 733.



#### 1-(4-Bromophenyl)-2-methyl-4-phenyl-1H-pyrrole-3-sulfonyl fluoride (4ff)

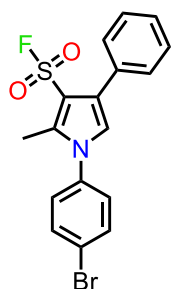

Following general procedure H, the title compound was isolated by flash column chromatography (0-10% EtOAc in petroleum ether) as a white solid (67.0 mg, 68%). **m.p.** 116 - 118 °C; **<sup>1</sup>H NMR** (400 MHz, CDCl<sub>3</sub>) δ 7.69 (appt. d, *J* = 8.8 Hz, 2H), 7.51 – 7.46 (m, 2H), 7.44 – 7.35 (m, 3H), 7.24 (appt. d, *J* = 8.8 Hz, 2H), 6.79 (s, 1H), 2.48 (d, *J* = 1.0 Hz, 3H); **<sup>13</sup>C NMR** (101 MHz, CDCl<sub>3</sub>) δ 137.6 (d, *J* = 2.9 Hz), 136.8, 133.1, 132.1, 129.5, 128.3, 128.2, 128.0, 126.4, 123.5, 122.0, 111.6 (d, *J* = 28.8 Hz), 12.4; **<sup>19</sup>F NMR** (471 MHz, CDCl<sub>3</sub>) δ 74.0; **HRMS** (ESI<sup>+</sup>): calculated for C<sub>17</sub>H<sub>13</sub>BrFKNO<sub>2</sub>S [M+K<sup>+</sup>]: *m/z* = 433.9446, *m/z* found 433.9440; **IR** *v*<sub>max</sub> (ATR)/cm<sup>-1</sup>: 3142, 2927, 2853, 1494, 1398, 1204.

#### 1-(4-Benzoylphenyl)-2-methyl-4-phenyl-1H-pyrrole-3-sulfonyl fluoride (4fg)

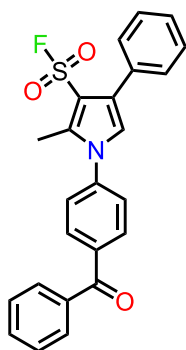

Following general procedure H, the title compound was isolated by flash column chromatography (0-10% EtOAc in petroleum ether) as an off-white solid (67.0 mg, 64%). **m.p.** 160 - 162 °C; **<sup>1</sup>H NMR** (400 MHz, CDCl<sub>3</sub>) δ 8.00 (appt. d, *J* = 8.7 Hz, 2H), 7.88 – 7.84 (m, 2H), 7.69 – 7.63 (m, 1H), 7.58 – 7.47 (m, 6H), 7.46 – 7.35 (m, 3H), 6.87 (s, 1H), 2.56 (d, *J* = 0.8 Hz, 3H); **<sup>13</sup>C NMR** (101 MHz, CDCl<sub>3</sub>) δ 195.3, 141.0, 138.4, 137.5 (d, *J* = 3.0 Hz), 137.0, 133.2, 132.0, 131.6, 130.2, 129.5, 128.7, 128.3, 128.1, 126.7, 126.5, 121.9, 112.1 (d, *J* = 28.8 Hz), 12.6; **<sup>19</sup>F NMR** (376 MHz, CDCl<sub>3</sub>) δ 73.9; **HRMS** (ESI<sup>+</sup>): calculated for C<sub>24</sub>H<sub>18</sub>FNO<sub>3</sub>SNa [M+Na<sup>+</sup>]: *m/z* = 442.0884, *m/z* found 442.0890; **IR** *v*<sub>max</sub> (ATR)/cm<sup>-1</sup>: 3064, 2925, 1661, 1601, 1511, 1400, 1207, 741.

#### 1-Benzyl-2-methyl-4-phenyl-1H-pyrrole-3-sulfonyl fluoride (4fh)

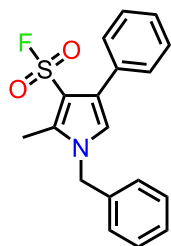

Following general procedure H, the title compound was isolated by flash column chromatography (0-10% EtOAc in petroleum ether) as a colourless oil (78.0 mg, 95%). **<sup>1</sup>H NMR** (400 MHz, CDCl<sub>3</sub>) δ 7.49 – 7.31 (m, 8H), 7.15 – 7.10 (m, 2H), 6.69 (s, 1H), 5.12 (s, 2H), 2.54 (d, *J* = 1.0 Hz, 3H); **<sup>13</sup>C NMR** (101 MHz, CDCl<sub>3</sub>) δ 137.5 (d, *J* = 2.7 Hz), 135.3, 132.6, 129.5, 129.4, 128.5, 128.2, 127.7, 126.9, 126.0, 121.7, 110.4 (d, *J* = 28.3 Hz), 51.4, 11.4; **<sup>19</sup>F NMR** (471 MHz, CDCl<sub>3</sub>) δ 74.1; **HRMS** (ESI<sup>+</sup>): calculated for C<sub>18</sub>H<sub>16</sub>FNO<sub>2</sub>SNa [M+Na<sup>+</sup>]: *m/z* = 352.0778, *m/z* found 352.0779; **IR** *v*<sub>max</sub> (ATR)/cm<sup>-1</sup>: 3064, 3033, 1605, 1506, 1397, 1229, 1183, 739.

#### 1-Benzyl-2-methyl-4-(4-propylphenyl)-1H-pyrrole-3-sulfonyl fluoride (4fi)

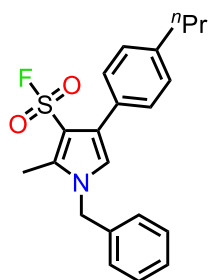

Following general procedure H, the title compound was isolated by flash column chromatography (0-10% EtOAc in petroleum ether) as a colourless oil (89.0 mg, 96%). **<sup>1</sup>H NMR** (400 MHz, CDCl<sub>3</sub>) δ 7.43 – 7.33 (m, 5H), 7.19 (appt. d, *J* = 8.4 Hz, 2H), 7.14 – 7.09 (m, 2H), 6.67 (s, 1H), 5.11 (s, 2H), 2.64 – 2.59 (m, 2H), 2.53 (d, *J* = 0.9 Hz, 3H), 1.73 – 1.62 (m, 2H), 1.00 – 0.95 (m, 3H); **<sup>13</sup>C NMR** (126 MHz, CDCl<sub>3</sub>) δ 142.3, 137.3 (d, *J* = 2.4 Hz), 135.4, 129.8, 129.4, 129.3, 128.5, 128.3, 126.9, 126.0, 121.6, 110.3 (d, *J* = 28.0 Hz), 51.3, 37.9, 24.6, 14.1, 11.5; **<sup>19</sup>F NMR** (471 MHz, CDCl<sub>3</sub>) δ 74.0; **HRMS** (ESI<sup>+</sup>): calculated for C<sub>21</sub>H<sub>22</sub>FNO<sub>2</sub>SNa [M+Na<sup>+</sup>]: *m/z* = 394.1247, *m/z* found 394.1249; **IR** *v*<sub>max</sub> (ATR)/cm<sup>-1</sup>: 3031, 2959, 2927, 2870, 1508, 1456, 1397, 1229, 1183, 733.

### 1-(4-Methoxybenzyl)-4-(4'-propyl-[1,1'-biphenyl]-4-yl)-1H-pyrrole-3-sulfonyl fluoride (4fj)

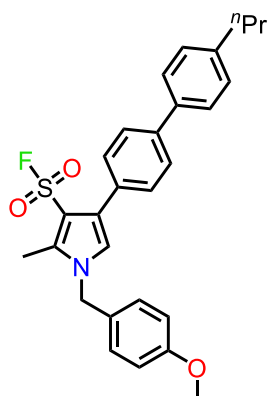

Following general procedure H, the title compound was isolated by flash column chromatography (0-10% EtOAc in petroleum ether) as a yellow solid (107 mg, 90%). **m.p.** 130 - 132 °C; **<sup>1</sup>H NMR** (400 MHz, CDCl<sub>3</sub>) δ 7.60 (appt. d, *J* = 8.6 Hz, 2H), 7.54 (appt. d, *J* = 8.3 Hz, 2H), 7.50 (appt. d, *J* = 8.6 Hz, 2H), 7.28 – 7.24 (m, 2H), 7.08 (appt. d, *J* = 8.9 Hz, 2H), 6.93 (appt. d, *J* = 8.8 Hz, 2H), 6.69 (s, 1H), 5.05 (s, 2H), 3.83 (s, 3H), 2.68 – 2.61 (m, 2H), 2.56 (d, *J* = 0.8 Hz, 3H), 1.70 (dp, *J* = 8.9, 7.3 Hz, 2H), 0.99 (t, *J* = 7.3 Hz, 3H); **<sup>13</sup>C NMR** (101 MHz, CDCl<sub>3</sub>) δ 159.8, 142.0, 140.5, 138.3, 137.5 (d, *J* = 2.7 Hz), 131.3, 129.8, 129.0, 128.5, 127.1, 127.0, 126.8, 125.6, 121.6, 114.8, 110.2 (d, *J* = 28.1 Hz), 55.5, 51.0, 37.9, 24.6, 14.0, 11.5; **<sup>19</sup>F NMR** (471 MHz, CDCl<sub>3</sub>) δ 74.1; **HRMS** (ESI<sup>+</sup>): calculated for C<sub>28</sub>H<sub>28</sub>FNO<sub>3</sub>Na [M+Na<sup>+</sup>]: *m/z* = 500.1666, *m/z* found 500.1666; **IR** *v*<sub>max</sub> (ATR)/cm<sup>-1</sup>: 3127, 2927, 1609, 1509, 1388, 1245, 1182, 744.

### 2-Methyl-4-phenyl-1-(4-(prop-2-yn-1-yloxy)phenyl)-1H-pyrrole-3-sulfonyl fluoride (4fk)

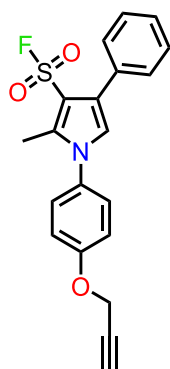

Following general procedure H, the title compound was isolated by flash column chromatography (0-10% EtOAc in petroleum ether) as a yellow oil (60.0 mg, 65%). **<sup>1</sup>H NMR** (500 MHz, CDCl<sub>3</sub>) δ 7.51 – 7.47 (m, 2H), 7.43 – 7.34 (m, 3H), 7.28 (appt. d, *J* = 9.4 Hz, 2H), 7.13 (appt. d, *J* = 8.9 Hz, 2H), 6.78 (s, 1H), 4.78 (d, *J* = 2.4 Hz, 2H), 2.59 (t, *J* = 2.4 Hz, 1H), 2.46 (d, *J* = 0.6 Hz, 3H); **<sup>13</sup>C NMR** (126 MHz, CDCl<sub>3</sub>) δ 158.0, 138.1 (d, *J* = 2.7 Hz), 132.4, 131.4, 129.5, 128.3, 127.9, 126.0, 122.5, 116.0, 110.8 (d, *J* = 28.4 Hz), 78.0, 76.4, 56.3, 12.4; **<sup>19</sup>F NMR** (376 MHz, CDCl<sub>3</sub>) δ 73.9; **HRMS** (ESI<sup>+</sup>): calculated for C<sub>20</sub>H<sub>16</sub>FNO<sub>3</sub>Na [M+Na<sup>+</sup>]: *m/z* = 392.0727, *m/z* found 392.0727; **IR** *v*<sub>max</sub> (ATR)/cm<sup>-1</sup>: 3290, 3057, 1512, 1398, 1204.

**1-Benzyl-4-phenyl-1H-pyrrole-3-sulfonyl fluoride (4fl)**

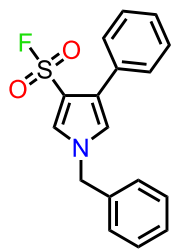

Following general procedure H, the title compound was isolated by flash column chromatography (0-10% EtOAc in petroleum ether) as a colourless oil (75.0 mg, 96%). **<sup>1</sup>H NMR** (400 MHz, CDCl<sub>3</sub>) δ 7.54 – 7.49 (m, 3H), 7.46 – 7.32 (m, 6H), 7.28 – 7.24 (m, 2H), 6.83 (d, *J* = 2.6 Hz, 1H), 5.11 (s, 2H); **<sup>13</sup>C NMR** (126 MHz, CDCl<sub>3</sub>) δ 134.9, 131.7, 129.4, 129.4, 129.0, 128.8, 128.6, 128.0, 127.9, 126.2, 122.7, 113.1 (d, *J* = 30.1 Hz), 54.6; **<sup>19</sup>F NMR** (471 MHz, CDCl<sub>3</sub>) δ 70.0; **HRMS** (ESI<sup>+</sup>): calculated for C<sub>17</sub>H<sub>14</sub>FNO<sub>2</sub>SNa [M+Na<sup>+</sup>]: *m/z* = 338.0621, *m/z* found 338.0613; **IR** *v*<sub>max</sub> (ATR)/cm<sup>-1</sup>: 3132, 2926, 2854, 1604, 1507, 1394, 1176, 749.

## Synthesis and experimental data for compounds 4ga-4an

### General Procedure I

To a solution of *L*-proline **35** (100  $\mu$ mol) in Ac<sub>2</sub>O (400  $\mu$ L) was added the required SASF **2** (120  $\mu$ mol) and heated to 120 °C for 3 h. The Ac<sub>2</sub>O was removed under a stream of nitrogen and the crude product purified by flash column chromatography to obtain the analytically pure product.

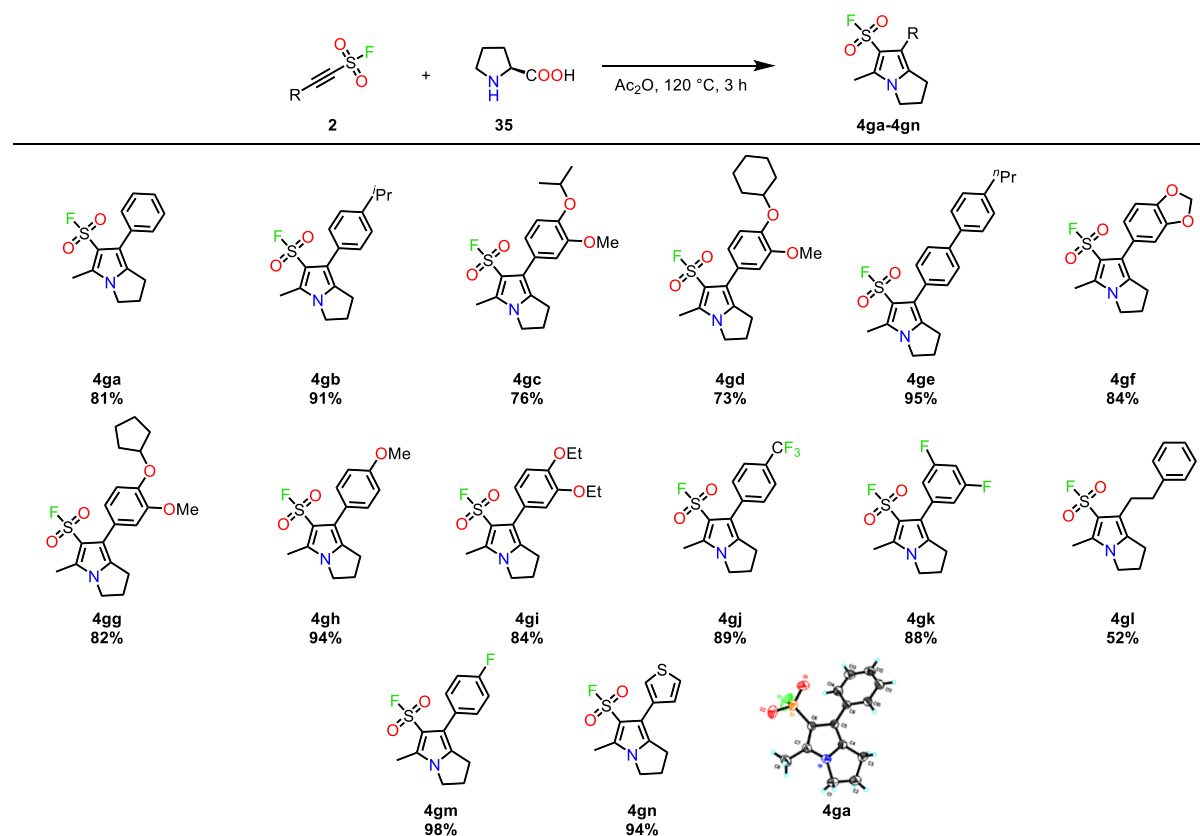

### 5-Methyl-7-phenyl-2,3-dihydro-1*H*-pyrrolizine-6-sulfonyl fluoride (4ga)

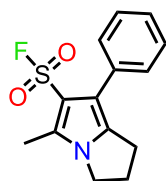

Following general procedure I (250  $\mu$ mol of *L*-proline used), the title compound was isolated after purification by flash column chromatography (0-15% EtOAc in petroleum ether) as a colourless solid (57.0 mg, 81%). **m.p.** 138 - 141 °C; **<sup>1</sup>H NMR** (400 MHz, CDCl<sub>3</sub>)  $\delta$  7.43 – 7.28 (m, 5H), 3.99 (appt. t, *J* = 7.3 Hz, 2H), 2.89 (appt. t, *J* = 7.4 Hz, 2H), 2.63 – 2.49 (m, 5H); **<sup>13</sup>C NMR** (101 MHz, CDCl<sub>3</sub>)  $\delta$  135.0 (d, *J* = 1.4 Hz), 133.1, 132.4 (d, *J* = 2.8 Hz), 129.5, 128.2, 127.1, 116.6, 110.9 (d, *J* = 27.3 Hz), 45.6, 26.9, 24.1, 12.1; **<sup>19</sup>F NMR** (376 MHz, CDCl<sub>3</sub>)  $\delta$  74.1; **HRMS** (ESI<sup>+</sup>): calculated for C<sub>14</sub>H<sub>14</sub>FNO<sub>2</sub>SNa [M+Na<sup>+</sup>]: *m/z* = 302.0621, *m/z* found 302.0623; **IR**  $\nu_{\text{max}}$ : 3070, 2926, 2853, 1501, 1372, 1240, 1171, 764, 739, 703.

#### 7-(4-Isopropylphenyl)-5-methyl-2,3-dihydro-1H-pyrrolizine-6-sulfonyl fluoride (4gb)

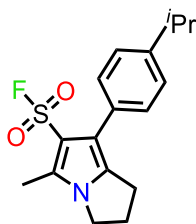

Following general procedure I, the title compound was isolated after purification by flash column chromatography (0-15% EtOAc in petroleum ether) as a beige solid (29.0 mg, 91%). **m.p.** 105 - 106 °C; **<sup>1</sup>H NMR** (500 MHz, CDCl<sub>3</sub>) δ 7.33 (appt. d, *J* = 8.3 Hz, 2H), 7.25 – 7.22 (m, 2H), 3.97 (appt. t, *J* = 7.1 Hz, 2H), 2.97 – 2.88 (m, 3H), 2.57 – 2.49 (m, 5H), 1.28 (d, *J* = 6.9 Hz, 6H); **<sup>13</sup>C NMR** (126 MHz, CDCl<sub>3</sub>) δ 147.5, 134.8, 132.3 (d, *J* = 2.6 Hz), 130.3, 130.1, 129.3, 126.3, 116.7, 110.8 (d, *J* = 27.1 Hz), 45.5, 33.9, 26.9, 24.2, 24.0, 12.1; **<sup>19</sup>F NMR** (376 MHz, CDCl<sub>3</sub>) δ 74.0; **HRMS** (ESI<sup>+</sup>): calculated for C<sub>17</sub>H<sub>20</sub>FNO<sub>2</sub>SNa [M+Na<sup>+</sup>]: *m/z* = 344.1091, *m/z* found 344.1091; **IR** ν<sub>max</sub> (ATR)/cm<sup>-1</sup>: 2959, 2927, 2854, 1515, 1394, 1238, 1172, 724.

#### 7-(4-Isopropoxy-3-methoxyphenyl)-5-methyl-2,3-dihydro-1H-pyrrolizine-6-sulfonyl fluoride (4gc)

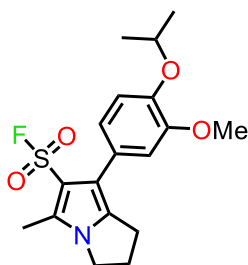

Following general procedure I, the title compound was isolated after purification by flash column chromatography (0-15% EtOAc in petroleum ether) as a colourless solid (29.0 mg, 76%). **m.p.** 93 - 94 °C; **<sup>1</sup>H NMR** (500 MHz, CDCl<sub>3</sub>) δ 7.01 – 6.98 (m, 1H), 6.90 – 6.88 (m, 2H), 4.55 (hept, *J* = 6.1 Hz, 1H), 3.97 (appt. t, *J* = 7.1 Hz, 2H), 3.86 (s, *J* = 3.6 Hz, 3H), 2.91 (appt. t, *J* = 7.4 Hz, 2H), 2.57 – 2.50 (m, 5H), 1.39 (d, *J* = 6.1 Hz, 6H); **<sup>13</sup>C NMR** (126 MHz, CDCl<sub>3</sub>) δ 149.8, 146.6, 134.7, 132.2, 125.8, 121.6, 116.5, 115.1, 113.8, 110.9 (d, *J* = 27.0 Hz), 71.4, 56.1, 45.5, 26.9, 24.3, 22.3, 12.2; **<sup>19</sup>F NMR** (376 MHz, CDCl<sub>3</sub>) δ 73.6; **HRMS** (ESI<sup>+</sup>): calculated for C<sub>18</sub>H<sub>22</sub>FNO<sub>4</sub>SNa [M+Na<sup>+</sup>]: *m/z* = 390.1146, *m/z* found 390.1146; **IR** ν<sub>max</sub> (ATR)/cm<sup>-1</sup>: 2978, 2928, 1510, 1464, 1240, 1211, 1165, 1139, 1109, 719.

#### 7-(4-(Cyclohexyloxy)-3-methoxyphenyl)-5-methyl-2,3-dihydro-1H-pyrrolizine-6-sulfonyl fluoride (4gd)

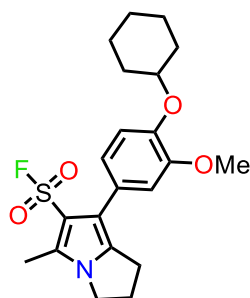

Following general procedure I, the title compound was isolated after purification by flash column chromatography (0-15% EtOAc in petroleum ether) as a beige solid (30.0 mg, 73%). **m.p.** 138 °C (decomposed); **<sup>1</sup>H NMR** (400 MHz, CDCl<sub>3</sub>) δ 6.99 (d, *J* = 1.2 Hz, 1H), 6.92 – 6.86 (m, 2H), 4.24 – 4.16 (m, 1H), 3.96 (appt. t, *J* = 7.1 Hz, 2H), 3.85 (s, 3H), 2.90 (appt. t, *J* = 7.4 Hz, 2H), 2.59 – 2.48 (m, 5H), 2.12 – 2.02 (m, 2H), 1.88 – 1.79 (m, 2H), 1.64 – 1.52 (m, 3H), 1.41 – 1.28 (m, 3H); **<sup>13</sup>C NMR** (101 MHz, CDCl<sub>3</sub>) δ 150.0, 146.6, 134.7, 132.2 (d, *J* = 2.8 Hz), 125.9, 121.6, 116.5, 115.6, 113.9, 110.9 (d, *J* = 27.3 Hz), 77.4, 56.1, 45.5, 32.3, 26.9, 25.8, 24.4, 24.3, 12.1; **<sup>19</sup>F NMR** (376 MHz, CDCl<sub>3</sub>) δ 73.7; **HRMS** (ESI<sup>+</sup>): calculated for C<sub>21</sub>H<sub>26</sub>FNO<sub>4</sub>SNa [M+Na<sup>+</sup>]: *m/z* = 430.1459, *m/z* found 430.1457; **IR** *v*<sub>max</sub> (ATR)/cm<sup>-1</sup>: 2925, 2853, 1512, 1392, 1237, 1162, 1137, 732.

#### 5-Methyl-7-(4'-propyl-[1,1'-biphenyl]-4-yl)-2,3-dihydro-1H-pyrrolizine-6-sulfonyl fluoride (4ge)

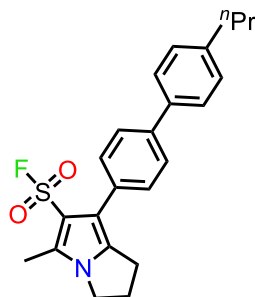

Following general procedure I, the title compound was isolated after purification by flash column chromatography (0-15% EtOAc in petroleum ether) as a beige solid (38.0 mg, 95%). **m.p.** 116 - 117 °C; **<sup>1</sup>H NMR** (500 MHz, CDCl<sub>3</sub>) δ 7.61 (appt. d, *J* = 8.5 Hz, 2H), 7.56 (appt. d, *J* = 8.2 Hz, 2H), 7.47 (appt. d, *J* = 8.5 Hz, 2H), 7.27 (appt. d, *J* = 8.3 Hz, 2H), 3.97 (appt. t, *J* = 7.2 Hz, 2H), 2.93 (appt. t, *J* = 7.4 Hz, 2H), 2.68 – 2.63 (m, 2H), 2.58 – 2.50 (m, 5H), 1.75 – 1.66 (m, 2H), 1.00 (t, *J* = 7.3 Hz, 3H); **<sup>13</sup>C NMR** (126 MHz, CDCl<sub>3</sub>) δ 141.9, 139.8, 138.3, 135.1, 132.5 (d, *J* = 2.5 Hz), 131.7, 129.7, 129.0, 127.0 (s, *J* = 4.2 Hz), 126.8, 116.3, 110.9 (d, *J* = 27.3 Hz), 45.6, 37.8, 26.9, 24.7, 24.3, 14.0, 12.1; **<sup>19</sup>F NMR** (376 MHz, CDCl<sub>3</sub>) δ 74.1; **HRMS** (ESI<sup>+</sup>): calculated for C<sub>23</sub>H<sub>24</sub>FNO<sub>2</sub>SNa [M+Na<sup>+</sup>]: *m/z* = 420.1404, *m/z* found 420.1400; **IR** *v*<sub>max</sub> (ATR)/cm<sup>-1</sup>: 2926, 2869, 1499, 1394, 1241, 1173, 738.

**7-(Benzo[d][1,3]dioxol-5-yl)-5-methyl-2,3-dihydro-1H-pyrrolizine-6-sulfonyl fluoride (4gf)**

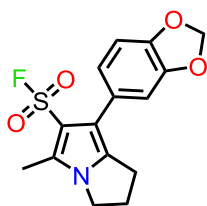

Following general procedure I, the title compound was isolated after purification by flash column chromatography (0-15% EtOAc in petroleum ether) as a beige solid (27.0 mg, 84%). **m.p.** 145 - 146 °C; **<sup>1</sup>H NMR** (500 MHz, CDCl<sub>3</sub>) δ 6.89 – 6.80 (m, 3H), 5.98 (s, 2H), 3.97 (appt. t, *J* = 7.1 Hz, 2H), 2.87 (appt. t, *J* = 7.4 Hz, 2H), 2.59 – 2.43 (m, 5H); **<sup>13</sup>C NMR** (126 MHz, CDCl<sub>3</sub>) δ 147.5, 146.9, 134.8, 132.1, 126.7, 123.0, 116.3, 111.0 (d, *J* = 27.1 Hz), 110.1, 108.2, 101.2, 45.6, 26.9, 24.0, 12.1; **<sup>19</sup>F NMR** (376 MHz, CDCl<sub>3</sub>) δ 74.0; **HRMS** (ESI<sup>+</sup>): calculated for C<sub>15</sub>H<sub>14</sub>FNO<sub>4</sub>SNa [M+Na<sup>+</sup>]: *m/z* = 346.0520, *m/z* found 346.0521; **IR** *v*<sub>max</sub> (ATR)/cm<sup>-1</sup>: 3071, 2905, 2856, 1489, 1449, 1375, 1225, 1175, 730.

**7-(4-(Cyclopentyloxy)-3-methoxyphenyl)-5-methyl-2,3-dihydro-1H-pyrrolizine-6-sulfonyl fluoride (4gg)**

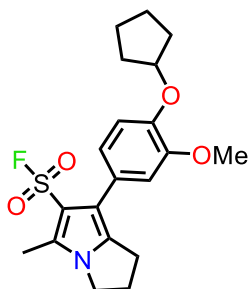

Following general procedure I, the title compound was isolated after purification by flash column chromatography (0-20% EtOAc in petroleum ether) as a brown solid (32.0 mg, 82%). **m.p.** 105 - 107 °C; **<sup>1</sup>H NMR** (500 MHz, CDCl<sub>3</sub>) δ 6.98 (d, *J* = 1.9 Hz, 1H), 6.90 (dd, *J* = 8.3, 1.9 Hz, 1H), 6.86 (d, *J* = 8.3 Hz, 1H), 4.81 – 4.76 (m, 1H), 3.96 (appt. t, *J* = 7.1 Hz, 2H), 3.85 (s, 3H), 2.90 (appt. t, *J* = 7.4 Hz, 2H), 2.57 – 2.50 (m, 5H), 1.97 – 1.91 (m, 4H), 1.88 – 1.81 (m, 2H), 1.65 – 1.58 (m, 2H); **<sup>13</sup>C NMR** (126 MHz, CDCl<sub>3</sub>) δ 149.4, 147.1, 134.7, 132.2, 125.4, 121.6, 116.6, 114.3, 113.8, 110.9 (d, *J* = 27.1 Hz), 80.4, 56.2, 45.5, 33.1, 26.9, 24.3, 24.2, 12.1; **<sup>19</sup>F NMR** (376 MHz, CDCl<sub>3</sub>) δ 73.6; **HRMS** (ESI<sup>+</sup>): calculated for C<sub>20</sub>H<sub>24</sub>FNO<sub>4</sub>SNa [M+Na<sup>+</sup>]: *m/z* = 416.1302, *m/z* found 416.1304; **IR** *v*<sub>max</sub> (ATR)/cm<sup>-1</sup>: 2952, 2888, 1513, 1392, 1238, 1163, 1140, 1027, 733.



#### 7-(4-Methoxyphenyl)-5-methyl-2,3-dihydro-1H-pyrrolizine-6-sulfonyl fluoride (4gh)

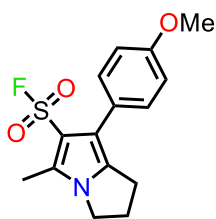

Following general procedure I, the title compound was isolated after purification by flash column chromatography (0-20% EtOAc in petroleum ether) as a colourless solid (29.0 mg, 94%). **m.p.** 78 - 81 °C; **<sup>1</sup>H NMR** (400 MHz, CDCl<sub>3</sub>) δ 7.32 (appt. d, *J* = 8.8 Hz, 2H), 6.92 (appt. d, *J* = 8.8 Hz, 2H), 3.96 (appt. t, *J* = 7.2 Hz, 2H), 3.83 (s, 3H), 2.87 (appt. t, *J* = 7.4 Hz, 2H), 2.58 – 2.49 (m, 5H); **<sup>13</sup>C NMR** (101 MHz, CDCl<sub>3</sub>) δ 158.8, 134.7, 132.1 (d, *J* = 2.7 Hz), 130.6, 125.3, 116.3, 113.7, 110.9 (d, *J* = 26.7 Hz), 55.3, 45.5, 26.9, 24.0, 12.1; **<sup>19</sup>F NMR** (376 MHz, CDCl<sub>3</sub>) δ 73.9; **HRMS** (ESI<sup>+</sup>): calculated for C<sub>15</sub>H<sub>16</sub>FNO<sub>3</sub>SNa [M+Na<sup>+</sup>]: *m/z* = 332.0727, *m/z* found 332.0727; **IR** ν<sub>max</sub> (ATR)/cm<sup>-1</sup>: 2926, 2854, 1513, 1391, 1237, 1169, 1028, 836, 735.

#### 7-(3,4-Diethoxyphenyl)-5-methyl-2,3-dihydro-1H-pyrrolizine-6-sulfonyl fluoride (4gi)

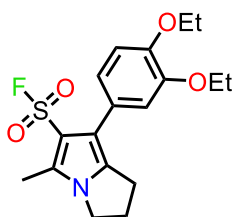

Following general procedure I, the title compound was isolated after purification by flash column chromatography (0-20% EtOAc in petroleum ether) as a beige solid (31.0 mg, 84%); **m.p.** 136 - 137 °C; **<sup>1</sup>H NMR** (400 MHz, CDCl<sub>3</sub>) δ 6.99 (d, *J* = 1.5 Hz, 1H), 6.91 – 6.86 (m, 2H), 4.12 (appt. q, *J* = 7.0 Hz, 4H), 3.96 (appt. t, *J* = 7.1 Hz, 2H), 2.89 (appt. t, *J* = 7.4 Hz, 2H), 2.57 – 2.49 (m, 5H), 1.48 – 1.42 (m, 6H); **<sup>13</sup>C NMR** (101 MHz, CDCl<sub>3</sub>) δ 148.2, 148.0, 134.7, 132.2 (d, *J* = 2.8 Hz), 125.6, 121.7, 116.5, 115.3, 113.1, 110.8 (d, *J* = 27.0 Hz), 64.6, 64.6, 45.5, 26.9, 24.2, 15.0, 14.9; **<sup>19</sup>F NMR** (376 MHz, CDCl<sub>3</sub>) δ 73.7; **HRMS** (ESI<sup>+</sup>): calculated for C<sub>18</sub>H<sub>22</sub>FNO<sub>4</sub>SNa [M+Na<sup>+</sup>]: *m/z* = 390.1146, *m/z* found 390.1148; **IR** ν<sub>max</sub> (ATR)/cm<sup>-1</sup>: 2981, 2926, 1515, 1393, 1239, 1140, 1040, 723.

#### 5-Methyl-7-(4-(trifluoromethyl)phenyl)-2,3-dihydro-1H-pyrrolizine-6-sulfonyl fluoride (4gj)

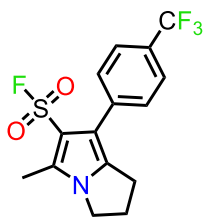

Following general procedure I, the title compound was isolated after purification by flash column chromatography (0-20% EtOAc in petroleum ether) as a colourless solid (31.0 mg, 89%). **m.p.** 106 - 108 °C; **<sup>1</sup>H NMR** (500 MHz, CDCl<sub>3</sub>) δ 7.63 (appt. d, *J* = 8.1 Hz, 2H), 7.51 (appt. d, *J* = 8.0 Hz, 2H), 4.00 (appt. t, *J* = 7.2 Hz, 2H), 2.90 (appt. t, *J* = 7.4 Hz, 2H), 2.61 – 2.53 (m, 5H); **<sup>13</sup>C NMR** (126 MHz, CDCl<sub>3</sub>) δ 136.9, 135.7, 133.0 (d, *J* = 2.7 Hz), 129.7, 129.1 (q, *J* = 32.4 Hz), 125.2 (q, *J* = 3.8 Hz), 124.4 (q, *J* = 272.1 Hz), 115.4, 111.1 (d, *J* = 27.9 Hz), 45.7 (s), 26.9, 24.2, 12.1; **<sup>19</sup>F NMR** (376 MHz, CDCl<sub>3</sub>) δ 74.1, -62.5; **HRMS** (ESI<sup>+</sup>): calculated for C<sub>15</sub>H<sub>13</sub>F<sub>4</sub>NO<sub>2</sub>SNa [M+Na<sup>+</sup>]: *m/z* = 370.0495, *m/z* found 370.0490; **IR** *v*<sub>max</sub> (ATR)/cm<sup>-1</sup>: 3036, 2960, 2851, 1618, 1397, 1323, 1244, 1161, 1109, 1067, 1039, 726.

#### 7-(3,5-Difluorophenyl)-5-methyl-2,3-dihydro-1H-pyrrolizine-6-sulfonyl fluoride (4gk)

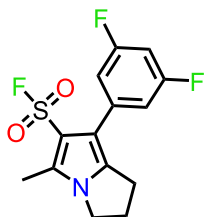

Following general procedure I, the title compound was isolated after purification by flash column chromatography (0-25% EtOAc in petroleum ether) as a colourless solid (28.0 mg, 88%). **m.p.** 158 - 159 °C; **<sup>1</sup>H NMR** (500 MHz, CDCl<sub>3</sub>) δ 6.91 (dt, *J* = 6.4, 3.2 Hz, 2H), 6.75 (tt, *J* = 9.0, 2.3 Hz, 1H), 3.99 (appt. t, *J* = 7.2 Hz, 2H), 2.90 (appt. t, *J* = 7.4 Hz, 2H), 2.62 – 2.50 (m, 5H); **<sup>13</sup>C NMR** (126 MHz, CDCl<sub>3</sub>) δ 162.8 (dd, *J* = 247.6, 13.4 Hz), 136.3 (t, *J* = 10.5 Hz), 135.7, 133.0 (d, *J* = 2.7 Hz), 114.6, 112.4 (dd, *J* = 20.0, 6.2 Hz), 111.0 (d, *J* = 28.1 Hz), 102.6 (t, *J* = 25.3 Hz), 45.7, 26.8, 24.2, 12.1. **<sup>19</sup>F NMR** (376 MHz, CDCl<sub>3</sub>) δ 74.1, -110.5 (t, *J* = 8.1 Hz); **HRMS** (ESI<sup>+</sup>): calculated for C<sub>14</sub>H<sub>12</sub>F<sub>3</sub>NO<sub>2</sub>SNa [M+Na<sup>+</sup>]: *m/z* = 338.0433, *m/z* found 338.0439; **IR** *v*<sub>max</sub> (ATR)/cm<sup>-1</sup>: 3088, 2927, 2852, 1625, 1594, 1434, 1396, 1280, 1213, 1160, 1118, 984, 863, 733.

#### 5-Methyl-7-phenethyl-2,3-dihydro-1H-pyrrolizine-6-sulfonyl fluoride (4gl)

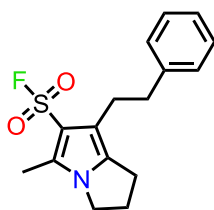

Following general procedure I, the title compound was isolated after purification by flash column chromatography (0-15% EtOAc in petroleum ether) as a colourless solid (16.0 mg, 52%). **m.p.** 59 - 60 °C; **<sup>1</sup>H NMR** (500 MHz, CDCl<sub>3</sub>) δ 7.27 – 7.23 (m, 2H), 7.20 – 7.16 (m, 1H), 7.15 – 7.11 (m, 2H), 3.84 – 3.79 (m, 2H), 2.90 – 2.83 (m, 4H), 2.46 (d, *J* = 0.9 Hz, 3H), 2.37 – 2.33 (m, 4H); **<sup>13</sup>C NMR** (126 MHz, CDCl<sub>3</sub>) δ 142.1, 134.6, 131.5, 128.9 (*s*, *J* = 9.1 Hz), 128.3, 125.9, 114.3, 110.6 (*d*, *J* = 25.2 Hz), 45.1, 36.8, 27.6, 27.1, 23.1, 11.8; **<sup>19</sup>F NMR** (376 MHz, CDCl<sub>3</sub>) δ 72.7; **HRMS** (ESI<sup>+</sup>): calculated for C<sub>16</sub>H<sub>18</sub>FNO<sub>2</sub>SNa [M+Na<sup>+</sup>]: *m/z* = 330.0934, *m/z* found 330.0933; **IR** ν<sub>max</sub> (ATR)/cm<sup>-1</sup>: 3023, 2865, 1453, 1375, 1212, 1150, 753, 721.

#### 7-(4-Fluorophenyl)-5-methyl-2,3-dihydro-1H-pyrrolizine-6-sulfonyl fluoride (4gm)

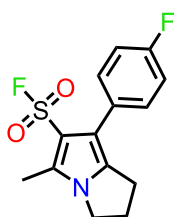

Following general procedure I, the title compound was isolated after purification by flash column chromatography (0-15% EtOAc in petroleum ether) as a yellow solid (42.0 mg, 94%). **m.p.** 143.5 °C; **<sup>1</sup>H NMR** (400 MHz, CDCl<sub>3</sub>) δ 7.40 – 7.29 (m, 2H), 7.15 – 6.98 (m, 2H), 3.97 (t, *J* = 7.2 Hz, 2H), 2.86 (t, *J* = 7.4 Hz, 2H), 2.61 – 2.49 (m, 2H), 2.51 (*s*, 3H); **<sup>13</sup>C NMR** (151 MHz, CDCl<sub>3</sub>) δ 162.2 (*d*, *J* = 246.0 Hz), 135.0, 132.4 (*d*, *J* = 2.7 Hz), 131.2 (*d*, *J* = 8.1 Hz), 129.0 (*d*, *J* = 3.3 Hz), 115.6, 115.2 (*d*, *J* = 21.5 Hz), 111.1 (*d*, *J* = 27.1 Hz), 45.6, 26.9, 24.0, 12.1; **<sup>19</sup>F NMR** (376 MHz, CDCl<sub>3</sub>) δ 73.45, -115.89; **HRMS** (APCI): calculated for C<sub>14</sub>H<sub>14</sub>F<sub>2</sub>NO<sub>2</sub>S [M+H<sup>+</sup>]: *m/z* = 298.0713, *m/z* found 298.0711.

## 5-Methyl-7-(thiophen-3-yl)-2,3-dihydro-1H-pyrrolizine-6-sulfonyl fluoride (4gn)

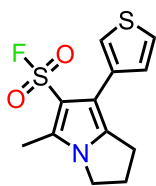

Following general procedure I, the title compound was isolated after purification by flash column chromatography (0-15% EtOAc in petroleum ether) as a yellow solid (40.0 mg, 93%). **m.p.** 125.1 °C; **<sup>1</sup>H NMR** (400 MHz, CDCl<sub>3</sub>) δ 7.37 – 7.29 (m, 2H), 7.21 (d, *J* = 4.9 Hz, 1H), 3.96 (t, *J* = 7.3 Hz, 2H), 2.93 (t, *J* = 7.4 Hz, 2H), 2.60 – 2.52 (m, 2H), 2.51 (s, 3H). **<sup>13</sup>C NMR** (151 MHz, CDCl<sub>3</sub>) δ 135.1, 132.7, 132.4 (d, *J* = 3.2 Hz), 128.6, 125.0, 122.7, 111.4, 110.7 (d, *J* = 27.6 Hz), 45.6, 26.9, 24.6, 12.2; **<sup>19</sup>F NMR** (376 MHz, CDCl<sub>3</sub>) δ 71.7; **HRMS** (APCI): calculated for C<sub>12</sub>H<sub>13</sub>FNO<sub>2</sub>S<sub>2</sub> [M+H<sup>+</sup>]: *m/z* = 286.0372, *m/z* found 286.0374.

## Synthesis and experimental data for compounds 4ha-4hj

### General Procedure J

To a solution of the required 2-(benzoylthio)-2-arylacetic acid **26** (100 μmol) in toluene (500 μL) was added TFAA (120 μmol), the required SASF **2** (120 μmol) and stirred at 120 °C for 16 h. The solvent was removed under reduced pressure and the crude product was purified by flash column chromatography to obtain the analytically pure product.

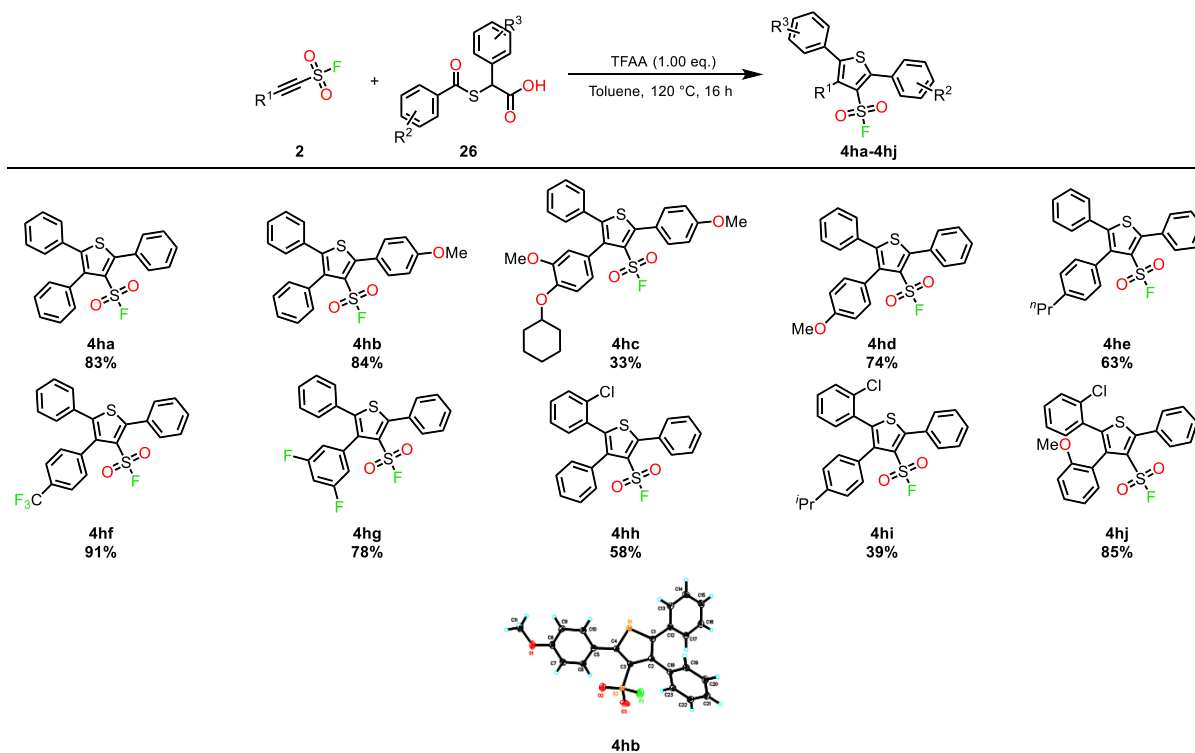

#### 2,4,5-Triphenylthiophene-3-sulfonyl fluoride (4ha)

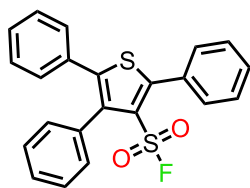

Following general procedure J (300  $\mu$ mol of the required 2-(benzoylthio)-2-arylacetic acid used), the title compound was isolated after purification by flash column chromatography (0-15% EtOAc in petroleum ether) as a colourless solid (33.0 mg, 83%). **m.p.** 135 - 136  $^{\circ}$ C;  $^1\text{H NMR}$  (400 MHz,  $\text{CDCl}_3$ )  $\delta$  7.64 – 7.58 (m, 2H), 7.54 – 7.47 (m, 3H), 7.40 – 7.31 (m, 5H), 7.26 – 7.21 (m, 3H), 7.19 – 7.14 (m, 2H);  $^{13}\text{C NMR}$  (126 MHz,  $\text{CDCl}_3$ )  $\delta$  151.7, 141.7, 137.5, 133.5, 132.0, 131.1, 130.6, 130.0, 129.3, 128.7, 128.6 (d,  $J$  = 2.6 Hz), 128.54, 128.4, 127.9 (d,  $J$  = 23.7 Hz), 116.0;  $^{19}\text{F NMR}$  (376 MHz,  $\text{CDCl}_3$ )  $\delta$  69.8; **HRMS** (ESI $^+$ ): calculated for  $\text{C}_{22}\text{H}_{15}\text{FO}_2\text{S}_2\text{Na}$  [ $\text{M}+\text{Na}^+$ ]:  $m/z$  = 417.0389,  $m/z$  found 417.0393; **IR**  $\nu_{\text{max}}$  (ATR)/ $\text{cm}^{-1}$ : 3054, 2926, 2852, 2359, 1410, 1201, 746.

#### 5-(4-Methoxyphenyl)-2,4-diphenylthiophene-3-sulfonyl fluoride (4hb)

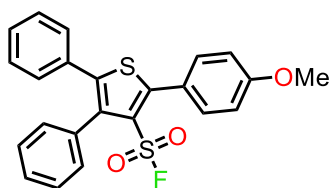

Following general procedure J, the title compound was isolated after purification by flash column chromatography (0-15% EtOAc in petroleum ether) as a colourless solid (36.0 mg, 84%). **m.p.** 110 – 112  $^{\circ}$ C;  $^1\text{H NMR}$  (400 MHz,  $\text{CDCl}_3$ )  $\delta$  7.58 – 7.51 (m, 2H), 7.40 – 7.30 (m, 5H), 7.24 (m, 3H), 7.19 – 7.12 (m, 2H), 7.07 – 6.98 (m, 2H), 3.89 (s, 3H);  $^{13}\text{C NMR}$  (101 MHz,  $\text{CDCl}_3$ )  $\delta$  161.1, 152.0, 141.1, 137.5, 133.7, 132.2, 131.4, 130.6, 129.3, 128.7, 128.5, 128.5, 128.4, 123.3, 114.1, 55.5;  $^{19}\text{F NMR}$  (376 MHz,  $\text{CDCl}_3$ )  $\delta$  69.7; **HRMS** (ESI $^+$ ): calculated for  $\text{C}_{23}\text{H}_{17}\text{FO}_3\text{S}_2\text{Na}$  [ $\text{M}+\text{Na}^+$ ]:  $m/z$  = 447.0495,  $m/z$  found 447.0498; **IR**  $\nu_{\text{max}}$  (ATR)/ $\text{cm}^{-1}$ : 3060, 3001, 2927, 2851, 1604, 1407, 1200, 755.

#### 4-(4-(Cyclohexyloxy)-3-methoxyphenyl)-5-(4-methoxyphenyl)-2-phenylthiophene-3-sulfonyl fluoride (4hc)

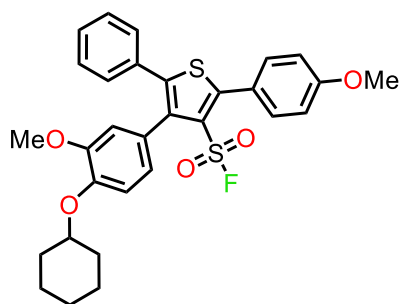

Following general procedure J, the title compound was isolated after purification by flash column chromatography (0-15% EtOAc in petroleum ether) as a colourless solid (18.0 mg, 33%). **m.p.** 72 - 74 °C; **<sup>1</sup>H NMR** (400 MHz, CDCl<sub>3</sub>) δ 7.54 (appt. d, *J* = 8.8 Hz, 2H), 7.27 – 7.20 (m, 3H), 7.21 – 7.13 (m, 2H), 7.01 (appt. d, *J* = 8.8 Hz, 2H), 6.91 – 6.78 (m, 3H), 4.23 (appt. ddd, *J* = 13.8, 9.6, 3.8 Hz, 1H), 3.88 (s, 3H), 3.74 (s, 3H), 2.17 – 1.94 (m, 2H), 1.94 – 1.71 (m, 2H), 1.71 – 1.48 (m, 3H), 1.48 – 1.15 (m, 3H); **<sup>13</sup>C NMR** (101 MHz, CDCl<sub>3</sub>) δ 161.1, 151.6, 150.1, 147.4, 140.8, 137.4, 132.4, 131.3, 129.2, 128.7, 128.4, 127.5 (d, *J* = 22.8 Hz), 126.1, 123.4, 123.2, 115.5, 114.7, 114.0, 77.3, 56.1, 55.53, 32.1, 25.7, 24.3; **<sup>19</sup>F NMR** (376 MHz, CDCl<sub>3</sub>) δ 68.8; **HRMS** (ESI<sup>+</sup>): calculated for C<sub>30</sub>H<sub>29</sub>FO<sub>5</sub>S<sub>2</sub>Na [M+Na<sup>+</sup>]: *m/z* = 575.1332, *m/z* found 575.1338; **IR** *v*<sub>max</sub> (ATR)/cm<sup>-1</sup>: 3069, 2931, 2854, 2360, 1605, 1605, 1249, 753.

#### 4-(4-Methoxyphenyl)-2,5-diphenylthiophene-3-sulfonyl fluoride (4hd)

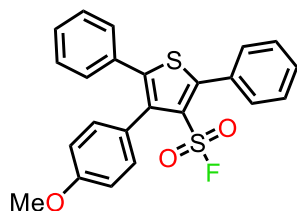

Following general procedure J, the title compound was isolated after purification by flash column chromatography (0-15% EtOAc in petroleum ether) as a colourless solid (31.0 mg, 74%). **m.p.** 149 - 150 °C; **<sup>1</sup>H NMR** (400 MHz, CDCl<sub>3</sub>) δ 7.65 – 7.57 (m, 2H), 7.50 (m, 3H), 7.31 – 7.22 (m, 5H), 7.23 – 7.15 (m, 2H), 6.94 – 6.83 (m, 2H), 3.84 (s, 3H); **<sup>13</sup>C NMR** (101 MHz, CDCl<sub>3</sub>) δ 159.7, 151.5 (d, *J* = 2.1 Hz), 141.6 (d, *J* = 2.0 Hz), 137.2, 132.2, 131.8, 131.2, 130.0, 129.9, 129.2, 128.7, 128.5, 128.0 (d, *J* = 23.3 Hz), 125.6, 113.9, 55.3; **<sup>19</sup>F NMR** (376 MHz, CDCl<sub>3</sub>) δ 69.3; **HRMS** (ESI<sup>+</sup>): calculated for C<sub>23</sub>H<sub>17</sub>FO<sub>3</sub>S<sub>2</sub>Na [M+Na<sup>+</sup>]: *m/z* = 447.0495, *m/z* found 447.0499; **IR** *v*<sub>max</sub> (ATR)/cm<sup>-1</sup>: 2934, 2859, 2359, 1605, 1404, 1031, 752.

### 2,5-Diphenyl-4-(4-propylphenyl)thiophene-3-sulfonyl fluoride (4he)

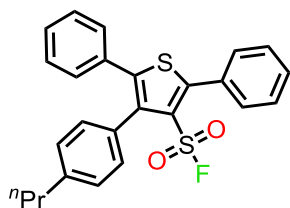

Following general procedure J, the title compound was isolated after purification by flash column chromatography (0-15% EtOAc in petroleum ether) as a colourless solid (28.0 mg, 63%). **m.p.** 157 - 159 °C; **<sup>1</sup>H NMR** (400 MHz, CDCl<sub>3</sub>) δ 7.66 – 7.57 (m, 2H), 7.55 – 7.46 (m, 3H), 7.26 – 7.20 (m, 5H), 7.20 – 7.13 (m, 4H), 2.68 – 2.58 (m, 2H), 1.74 – 1.62 (m, 2H), 0.94 (t, *J* = 7.3 Hz, 3H); **<sup>13</sup>C NMR** (101 MHz, CDCl<sub>3</sub>) δ 151.5 (d, *J* = 2.2 Hz), 143.0, 141.5 (d, *J* = 1.8 Hz), 137.7, 132.2, 131.2, 130.7, 130.4, 130.0, 129.9, 129.2, 128.6, 128.5, 128.5, 128.0 (d, *J* = 23.4 Hz), 37.9, 24.3, 13.8; **<sup>19</sup>F NMR** (376 MHz, CDCl<sub>3</sub>) δ 69.5; **HRMS** (ESI<sup>+</sup>): calculated for C<sub>25</sub>H<sub>21</sub>FO<sub>2</sub>S<sub>2</sub>Na [M+Na<sup>+</sup>]: *m/z* = 459.0859, *m/z* found 459.0854; **IR** *v*<sub>max</sub> (ATR)/cm<sup>-1</sup>: 3040, 2958, 2924, 2860, 1408, 1202 750.

### 2,5-Diphenyl-4-(4-(trifluoromethyl)phenyl)thiophene-3-sulfonyl fluoride (4hf)

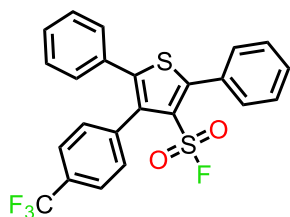

Following general procedure J, the title compound was isolated after purification by flash column chromatography (0-15% EtOAc in petroleum ether) as a colourless solid (42.0 mg, 91%). **m.p.** 199 - 200 °C; **<sup>1</sup>H NMR** (400 MHz, CDCl<sub>3</sub>) δ 7.66 – 7.59 (m, 4H), 7.52 (m, 3H), 7.47 (d, *J* = 8.1 Hz, 2H), 7.34 – 7.24 (m, 3H), 7.14 (appt. dd, *J* = 8.0, 1.6 Hz, 2H); **<sup>13</sup>C NMR** (101 MHz, CDCl<sub>3</sub>) δ 152.4 (d, *J* = 2.1 Hz), 142.5, 137.4, 135.8, 131.5, 131.1, 130.8, 130.2, 130.6 (d, *J* = 32.5 Hz), 130.0, 129.3, 129.0, 128.9, 128.6, 127.6 (d, *J* = 24.5 Hz), 125.3 (q, *J* = 3.7 Hz), 124.1 (q, *J* = 272.3 Hz); **<sup>19</sup>F NMR** (376 MHz, CDCl<sub>3</sub>) δ 70.4, -62.6; **HRMS** (ESI<sup>+</sup>): calculated for C<sub>23</sub>H<sub>14</sub>F<sub>4</sub>O<sub>2</sub>S<sub>2</sub>Na [M+Na<sup>+</sup>]: *m/z* = 485.0263, *m/z* found 485.0264; **IR** *v*<sub>max</sub> (ATR)/cm<sup>-1</sup>: 3066, 2960, 2924, 2854, 1326, 1124, 746.

#### 4-(3,5-Difluorophenyl)-2,5-diphenylthiophene-3-sulfonyl fluoride (4hg)

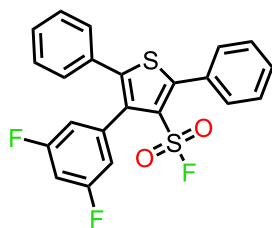

Following general procedure J, the title compound was isolated after purification by flash column chromatography (0-15% EtOAc in petroleum ether) as a colourless solid (34.0 mg, 78%). **m.p.** 165 - 168 °C; **<sup>1</sup>H NMR** (400 MHz, CDCl<sub>3</sub>) δ 7.65 – 7.56 (m, 2H), 7.56 – 7.45 (m, 3H), 7.38 – 7.25 (m, 3H), 7.22 – 7.14 (m, 2H), 6.96 – 6.77 (m, 3H); **<sup>13</sup>C NMR** (101 MHz, CDCl<sub>3</sub>) δ 164.0 (d, *J* = 13.0 Hz), 161.5 (d, *J* = 13.0 Hz), 152.4 (d, *J* = 2.1 Hz), 142.6 (d, *J* = 1.9 Hz), 136.6 (t, *J* = 10.3 Hz), 134.7, 131.3, 130.7, 130.2, 130.0, 129.2, 129.1, 129.0, 128.6, 127.4 (d, *J* = 24.8 Hz), 114.0 (d, *J* = 26.0 Hz), 114.0 (d, *J* = 11.5 Hz), 104.3 (t, *J* = 25.1 Hz); **<sup>19</sup>F NMR** (376 MHz, CDCl<sub>3</sub>) δ 70.6, -106.0 – -115.6 (m); **HRMS** (ESI<sup>+</sup>): calculated for C<sub>22</sub>H<sub>13</sub>F<sub>3</sub>O<sub>2</sub>S<sub>2</sub>Na [M+Na<sup>+</sup>]: *m/z* = 453.0201, *m/z* found 453.0200; **IR** *v*<sub>max</sub> (ATR)/cm<sup>-1</sup>: 3087, 2927, 2852, 1620, 1202, 1118, 752.

#### 2-(2-Chlorophenyl)-4,5-diphenylthiophene-3-sulfonyl fluoride (4hh)

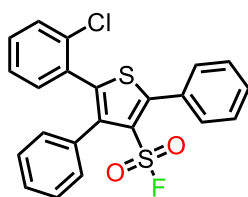

Following general procedure J, the title compound was isolated after purification by flash column chromatography (0-15% EtOAc in petroleum ether) as a colourless solid (25.0 mg, 58%). **m.p.** 95 - 96 °C; **<sup>1</sup>H NMR** (400 MHz, CDCl<sub>3</sub>) δ 7.70 – 7.60 (m, 2H), 7.58 – 7.45 (m, 3H), 7.42 – 7.36 (m, 1H), 7.34 – 7.21 (m, 6H), 7.21 – 7.11 (m, 2H); **<sup>13</sup>C NMR** (101 MHz, CDCl<sub>3</sub>) δ 153.1, 140.4, 138.1, 134.7, 133.2, 133.1, 131.0, 130.7, 130.5, 130.1, 130.0, 129.9, 128.5, 128.4, 128.0, 126.9 (d, *J* = 24.4 Hz), 126.7; **<sup>19</sup>F NMR** (376 MHz, CDCl<sub>3</sub>) δ 70.0; **HRMS** (ESI<sup>+</sup>): calculated for C<sub>22</sub>H<sub>14</sub>ClFO<sub>2</sub>S<sub>2</sub>Na [M+Na<sup>+</sup>]: *m/z* = 451.0000, *m/z* found 451.0005; **IR** *v*<sub>max</sub> (ATR)/cm<sup>-1</sup>: 3065, 2925, 2853, 1409, 1201, 744.



#### 2-(2-Chlorophenyl)-4-(4-isopropylphenyl)-5-phenylthiophene-3-sulfonyl fluoride (4hi)

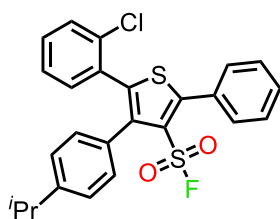

Following general procedure J, the title compound was isolated after purification by flash column chromatography (0-15% EtOAc in petroleum ether) as a colourless solid (18.0 mg, 39%). **m.p.** 112 - 114 °C; **<sup>1</sup>H NMR** (400 MHz, CDCl<sub>3</sub>) δ 7.68 – 7.60 (m, 2H), 7.55 – 7.47 (m, 3H), 7.39 (appt. dd, *J* = 8.0, 0.7 Hz, 1H), 7.27 – 7.17 (m, 3H), 7.14 (m, 4H), 2.93 – 2.77 (m, 1H), 1.21 (d, *J* = 6.9 Hz, 6H); **<sup>13</sup>C NMR** (101 MHz, CDCl<sub>3</sub>) δ 152.9, 148.9, 140.6, 137.9, 134.7, 133.2, 131.1, 130.9, 130.3, 130.0, 130.0, 129.8, 128.5, 127.0 (d, *J* = 23.9 Hz), 126.6, 126.0, 33.8, 23.9; **<sup>19</sup>F NMR** (376 MHz, CDCl<sub>3</sub>) δ 69.6; ; **HRMS** (ESI<sup>+</sup>): calculated for C<sub>25</sub>H<sub>20</sub>ClFO<sub>2</sub>S<sub>2</sub>Na [M+Na<sup>+</sup>]: *m/z* =493.0469, *m/z* found 493.0470; **IR** *v*<sub>max</sub> (ATR)/cm<sup>-1</sup>:3071, 2960, 2926, 2889, 2360, 1202, 749.

#### 2-(2-Chlorophenyl)-4-(2-methoxyphenyl)-5-phenylthiophene-3-sulfonyl fluoride (4hj)

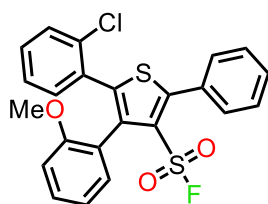

Following general procedure J, the title compound was isolated after purification by flash column chromatography (0-15% EtOAc in petroleum ether) as a colourless solid (39.0 mg, 85%). **m.p.** 119 - 120 °C; **<sup>1</sup>H NMR** (400 MHz, CDCl<sub>3</sub>) δ 7.69 (appt. dd, *J* = 6.5, 2.8 Hz, 2H), 7.54 – 7.47 (m, 3H), 7.39 (d, *J* = 7.9 Hz, 1H), 7.30 – 7.22 (m, 2H), 7.22 – 7.16 (m, 1H), 7.16 – 7.09 (m, 1H), 7.07 (appt. d, *J* = 7.4 Hz, 1H), 6.88 – 6.78 (m, 2H), 3.80 (s, 3H); **<sup>13</sup>C NMR** (101 MHz, CDCl<sub>3</sub>) δ 157.6, 152.7, 137.9, 137.1, 134.5, 132.9, 131.4, 131.3, 131.2, 130.2, 130.2, 130.1, 130.0, 129.8, 128.5, 127.5 (d, *J* = 24.0 Hz), 126.6, 122.4, 120.2, 110.4, 55.3; **<sup>19</sup>F NMR** (376 MHz, CDCl<sub>3</sub>) δ 69.0; **HRMS** (ESI<sup>+</sup>): calculated for C<sub>23</sub>H<sub>16</sub>ClFO<sub>3</sub>S<sub>2</sub>Na [M+Na<sup>+</sup>]: *m/z* =481.0105, *m/z* found 481.0108; **IR** *v*<sub>max</sub> (ATR)/cm<sup>-1</sup>:2979, 2934, 1674, 1590, 1412, 1265, 787.

## Synthesis and experimental data for compounds 4ia-4aj

### General Procedure K

To a solution of the required SASF **2** (100  $\mu\text{mol}$ ) in  $\text{CH}_2\text{Cl}_2$  (500  $\mu\text{L}$ ) at 0  $^\circ\text{C}$  was added *N*-(methoxymethyl)-*N*-(trimethylsilylmethyl)benzylamine **36** (92%, 110  $\mu\text{mol}$ , 30.0  $\mu\text{L}$ ) and TFA (1.50  $\mu\text{L}$ , 20.0 mol%).<sup>[19]</sup> The solution was stirred at 0  $^\circ\text{C}$  for 0.5 h and the solvent was then removed under reduced pressure. The crude product was purified by flash column chromatography to obtain the analytically pure product.

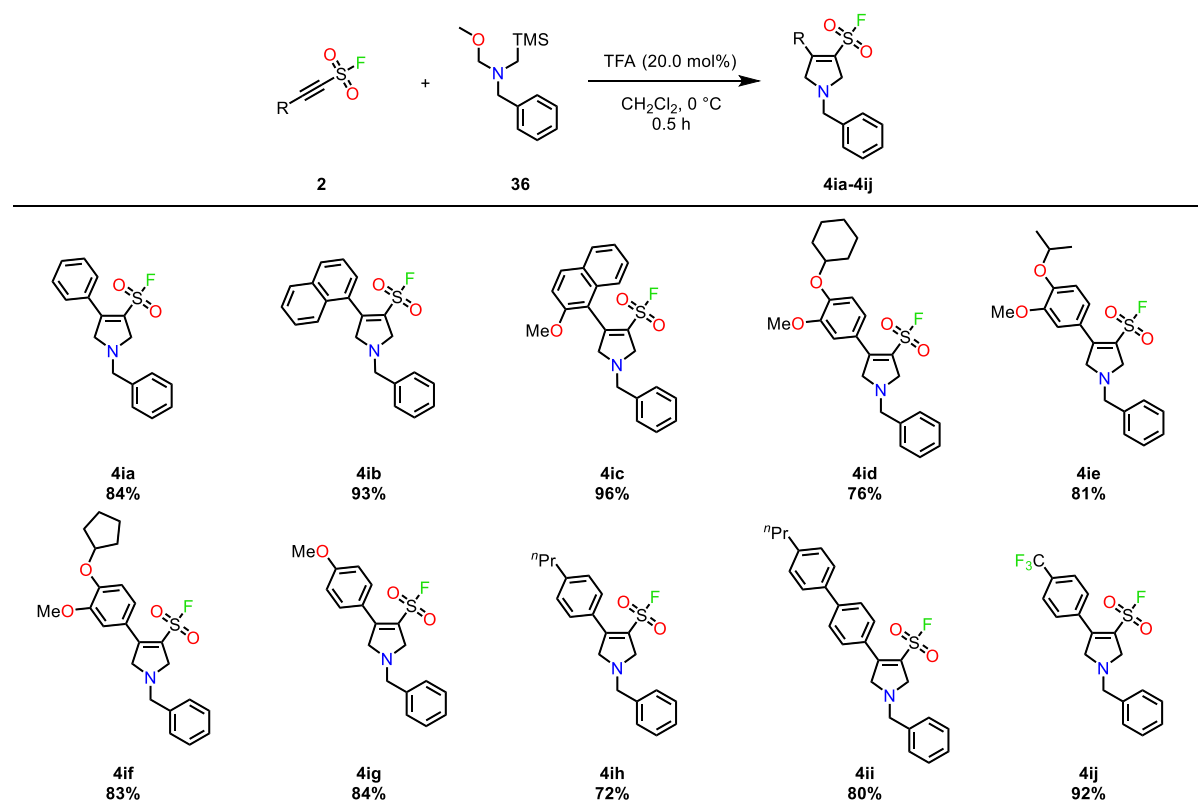

### 1-Benzyl-4-phenyl-2,5-dihydro-1H-pyrrole-3-sulfonyl fluoride (4ia)

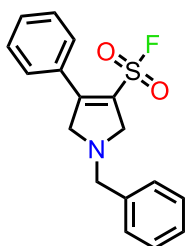

Following general procedure K (250  $\mu\text{mol}$  of SASF), the title compound was isolated by flash column chromatography (0-15% EtOAc in petroleum ether) as a pale yellow oil (66.0 mg, 84%). **<sup>1</sup>H NMR** (400 MHz,  $\text{CDCl}_3$ )  $\delta$  7.46 – 7.29 (m, 10H), 4.13 – 4.05 (m, 4H), 3.90 (s, 2H); **<sup>13</sup>C NMR** (101 MHz,  $\text{CDCl}_3$ )  $\delta$  156.2 (d,  $J = 3.1$  Hz), 137.7, 130.6, 130.6, 128.8, 128.8, 128.56, 128.1 (d,  $J = 0.9$  Hz), 127.8, 125.5 (d,  $J = 26.9$  Hz), 65.4 (d,  $J = 1.6$  Hz), 60.8, 59.7; **<sup>19</sup>F NMR** (376 MHz,  $\text{CDCl}_3$ )  $\delta$  63.8; **HRMS** (ESI<sup>+</sup>): calculated for  $\text{C}_{17}\text{H}_{17}\text{FNO}_2\text{S}$  [ $\text{M}+\text{H}^+$ ]:  $m/z = 318.0959$ ,  $m/z$  found 318.0966; **IR**  $\nu_{\text{max}}$  (ATR)/ $\text{cm}^{-1}$ : 3029, 1603, 1552, 1396, 1207, 1176.

#### 1-Benzyl-4-(naphthalen-1-yl)-2,5-dihydro-1H-pyrrole-3-sulfonyl fluoride (4ib)

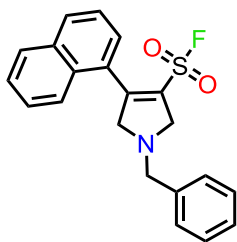

Following general procedure K, the title compound was isolated by flash column chromatography (0-12% EtOAc in petroleum ether) as a pale yellow oil (34.0 mg, 93%). **<sup>1</sup>H NMR** (400 MHz, CDCl<sub>3</sub>) δ 7.90 (d, *J* = 7.6 Hz, 2H), 7.79 (d, *J* = 7.7 Hz, 1H), 7.60 – 7.47 (m, 3H), 7.44 – 7.28 (m, 6H), 4.27 – 4.04 (m, 4H), 3.95 (s, 2H); **<sup>13</sup>C NMR** (101 MHz, CDCl<sub>3</sub>) δ 157.2, 137.7, 133.5, 130.2, 129.9, 129.4 (d, *J* = 27.2 Hz), 128.8, 127.8, 127.2, 126.6, 125.3, 125.1, 124.5, 66.7, 59.9, 59.9; **<sup>19</sup>F NMR** (376 MHz, CDCl<sub>3</sub>) δ 62.3; **HRMS** (ESI<sup>+</sup>): calculated for C<sub>21</sub>H<sub>19</sub>FNO<sub>2</sub>S [M+H<sup>+</sup>]: *m/z* = 368.1115, *m/z* found 368.1124; **IR** ν<sub>max</sub> (ATR)/cm<sup>-1</sup>: 2925, 1503, 1396, 1194, 1121.

#### 1-Benzyl-4-(2-methoxynaphthalen-1-yl)-2,5-dihydro-1H-pyrrole-3-sulfonyl fluoride (4ic)

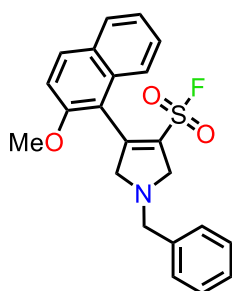

Following general procedure K, the title compound was isolated by flash column chromatography (0-12% EtOAc in petroleum ether) as a pale yellow oil (38.0 mg, 96%). **<sup>1</sup>H NMR** (500 MHz, CDCl<sub>3</sub>) δ 7.89 (d, *J* = 9.0 Hz, 1H), 7.81 (d, *J* = 8.2 Hz, 1H), 7.65 – 7.62 (m, 1H), 7.52 (ddd, *J* = 8.4, 6.8, 1.3 Hz, 1H), 7.43 (t, *J* = 6.9 Hz, 2H), 7.41 – 7.35 (m, 3H), 7.33 – 7.28 (m, 2H), 4.30 – 4.22 (m, 1H), 4.18 – 4.03 (m, 2H), 4.03 – 3.92 (m, 6H); **<sup>13</sup>C NMR** (126 MHz, CDCl<sub>3</sub>) δ 154.3, 153.4, 138.0, 131.5, 131.3, 129.5 (d, *J* = 27.6 Hz), 128.9, 128.8, 128.7, 128.5, 127.7, 127.6, 124.2, 123.4, 113.5, 112.8, 65.0, 60.1, 59.7, 56.5; **<sup>19</sup>F NMR** (376 MHz, CDCl<sub>3</sub>) δ 59.8; **HRMS** (ESI<sup>+</sup>): calculated for C<sub>22</sub>H<sub>21</sub>FNO<sub>3</sub>S [M+H<sup>+</sup>]: *m/z* = 398.1221, *m/z* found 398.1230; **IR** ν<sub>max</sub> (ATR)/cm<sup>-1</sup>: 2936, 2838, 1620, 1593, 1506, 1396, 1251, 1202, 1065.

#### 1-Benzyl-4-(4-(cyclohexyloxy)-3-methoxyphenyl)-2,5-dihydro-1H-pyrrole-3-sulfonyl fluoride (4id)

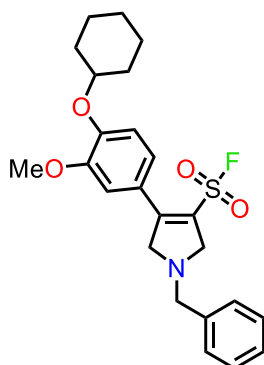

Following general procedure K, the title compound was isolated by flash column chromatography (0-15% EtOAc in petroleum ether) as a pale yellow oil (34.0 mg, 76%). **<sup>1</sup>H NMR** (400 MHz, CDCl<sub>3</sub>) δ 7.41 – 7.28 (m, 5H), 7.07 (d, *J* = 2.2 Hz, 1H), 6.99 (dd, *J* = 8.5, 2.2 Hz, 1H), 6.88 (d, *J* = 8.5 Hz, 1H), 4.32 – 4.23 (m, 1H), 4.07 (s, 4H), 3.86 (s, 5H), 2.10 – 1.99 (m, 2H), 1.89 – 1.79 (m, 2H), 1.65 – 1.53 (m, 3H), 1.43 – 1.23 (m, 3H); **<sup>13</sup>C NMR** (126 MHz, CDCl<sub>3</sub>) δ 155.5, 149.8, 149.8, 137.9, 128.8, 128.7, 127.7, 123.2 (d, *J* = 25.9 Hz), 122.7, 121.8, 114.3, 112.8, 77.1, 65.1, 61.2, 59.8, 56.3, 32.0, 25.6, 24.2; **<sup>19</sup>F NMR** (376 MHz, CDCl<sub>3</sub>) δ 64.0; **HRMS** (ESI<sup>+</sup>): calculated for C<sub>24</sub>H<sub>29</sub>FNO<sub>4</sub>S [M+H<sup>+</sup>]: *m/z* = 446.1796, *m/z* found 446.1785; **IR** *v*<sub>max</sub> (ATR)/cm<sup>-1</sup>: 2933, 2856, 1501, 1453, 1395, 1203.

#### 1-Benzyl-4-(4-isopropoxy-3-methoxyphenyl)-2,5-dihydro-1H-pyrrole-3-sulfonyl fluoride (4ie)

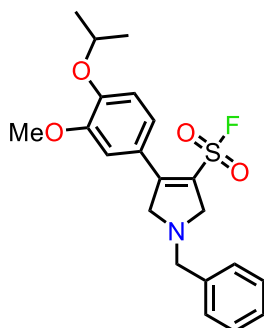

Following general procedure K, the title compound was isolated by flash column chromatography (0-15% EtOAc in petroleum ether) as a pale yellow oil (33.0 mg, 81%). **<sup>1</sup>H NMR** (400 MHz, CDCl<sub>3</sub>) δ 7.40 – 7.28 (m, 5H), 7.08 (d, *J* = 2.1 Hz, 1H), 6.99 (dd, *J* = 8.5, 2.1 Hz, 1H), 6.87 (d, *J* = 8.5 Hz, 1H), 4.60 (hept, *J* = 6.0 Hz, 1H), 4.07 (s, 4H), 3.87 (s, 5H), 1.40 (d, *J* = 6.1 Hz, 6H); **<sup>13</sup>C NMR** (101 MHz, CDCl<sub>3</sub>) δ 155.5 (d, *J* = 2.8 Hz), 149.9, 149.7, 137.9, 128.8, 128.7, 127.7, 123.2 (d, *J* = 26.0 Hz), 122.7, 121.8, 113.9, 112.6, 71.4, 65.1, 61.2, 59.8, 56.2, 22.1; **<sup>19</sup>F NMR** (376 MHz, CDCl<sub>3</sub>) δ 64.0; **HRMS** (ESI<sup>+</sup>): calculated for C<sub>21</sub>H<sub>25</sub>FNO<sub>4</sub>S [M+H<sup>+</sup>]: *m/z* = 406.1483, *m/z* found 406.1498; **IR** *v*<sub>max</sub> (ATR)/cm<sup>-1</sup>: 2976, 2931, 1599, 1510, 1402, 1257, 1200, 1140.

**1-Benzyl-4-(4-(cyclopentyloxy)-3-methoxyphenyl)-2,5-dihydro-1H-pyrrole-3-sulfonyl fluoride (4if)**

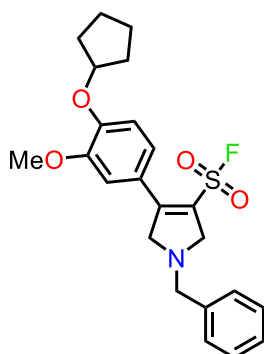

Following general procedure K, the title compound was isolated by flash column chromatography (0-15% EtOAc in petroleum ether) as a colourless oil (36.0 mg, 83%). **<sup>1</sup>H NMR** (400 MHz, CDCl<sub>3</sub>) δ 7.41 – 7.28 (m, 5H), 7.07 (d, *J* = 2.1 Hz, 1H), 6.99 (dd, *J* = 8.5, 2.1 Hz, 1H), 6.85 (d, *J* = 8.5 Hz, 1H), 4.80 (appt. dt, *J* = 9.4, 3.1 Hz, 1H), 4.07 (s, 4H), 3.86 (d, *J* = 7.2 Hz, 5H), 2.02 – 1.78 (m, 6H), 1.69 – 1.58 (m, 2H); **<sup>13</sup>C NMR** (101 MHz, CDCl<sub>3</sub>) δ 155.5, 150.3, 149.5, 137.7, 128.8, 128.8, 127.8, 123.0 (d, *J* = 26.0 Hz), 122.3, 121.9, 113.6, 112.6, 80.6, 65.0, 61.1, 59.8, 56.3, 33.0, 24.3; **<sup>19</sup>F NMR** (376 MHz, CDCl<sub>3</sub>) δ 64.1; **HRMS** (ESI<sup>+</sup>): calculated for C<sub>23</sub>H<sub>27</sub>FNO<sub>4</sub>S [M+H<sup>+</sup>]: *m/z* = 432.1639, *m/z* found 432.1645; **IR** *v*<sub>max</sub> (ATR)/cm<sup>-1</sup>: 2956, 2870, 1501, 1395, 1236, 1203, 1165, 1031.

**1-Benzyl-4-(4-methoxyphenyl)-2,5-dihydro-1H-pyrrole-3-sulfonyl fluoride (4ig)**

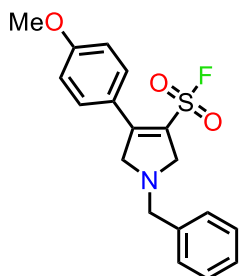

Following general procedure K, the title compound was isolated by flash column chromatography (0-15% EtOAc in petroleum ether) as a white solid (29.0 mg, 84%). **m.p.** 73 - 75 °C **<sup>1</sup>H NMR** (400 MHz, CDCl<sub>3</sub>) δ 7.42 (appt. d, *J* = 9.0 Hz, 2H), 7.39 – 7.29 (m, 5H), 6.92 (appt. d, *J* = 9.0 Hz, 2H), 4.07 (s, 4H), 3.87 (s, 2H), 3.84 (s, 3H); **<sup>13</sup>C NMR** (101 MHz, CDCl<sub>3</sub>) δ 161.7, 155.6, 137.7, 130.3, 128.8, 127.8, 123.2 (d, *J* = 26.3 Hz), 122.6, 114.0, 65.1, 61.0, 59.8, 55.5; **<sup>19</sup>F NMR** (376 MHz, CDCl<sub>3</sub>) δ 64.0; **HRMS** (ESI<sup>+</sup>): calculated for C<sub>18</sub>H<sub>19</sub>FNO<sub>3</sub>S [M+H<sup>+</sup>]: *m/z* = 348.1064, *m/z* found 348.1077; **IR** *v*<sub>max</sub> (ATR)/cm<sup>-1</sup>: 2926, 2816, 1599, 1514, 1400, 1259, 1186, 1023.

#### 1-Benzyl-4-(4-propylphenyl)-2,5-dihydro-1H-pyrrole-3-sulfonyl fluoride (4ih)

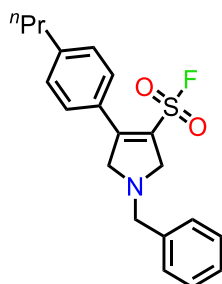

Following general procedure K, the title compound was isolated by flash column chromatography (0-10% EtOAc in petroleum ether) as a colourless oil (26.0 mg, 72%). **<sup>1</sup>H NMR** (400 MHz, CDCl<sub>3</sub>) δ 7.40 – 7.28 (m, 7H), 7.22 (appt. d, *J* = 8.2 Hz, 2H), 4.12 – 4.03 (m, 4H), 3.88 (s, 2H), 2.64 – 2.59 (m, 2H), 1.73 – 1.58 (m, 2H), 0.95 (t, *J* = 7.3 Hz, 3H); **<sup>13</sup>C NMR** (101 MHz, CDCl<sub>3</sub>) δ 156.2 (d, *J* = 2.9 Hz), 145.9, 137.7, 128.8, 128.8, 128.7, 128.3, 128.3, 127.8, 124.4 (d, *J* = 26.6 Hz), 65.3, 60.9, 59.8, 38.0, 24.3, 13.9; **<sup>19</sup>F NMR** (376 MHz, CDCl<sub>3</sub>) δ 63.8; **HRMS** (ESI<sup>+</sup>): calculated for C<sub>20</sub>H<sub>23</sub>FNO<sub>2</sub>S [M+H<sup>+</sup>]: *m/z* = 360.1428, *m/z* found 360.1435; **IR** *v*<sub>max</sub> (ATR)/cm<sup>-1</sup>: 2958, 2928, 1556, 1497, 1397, 1206, 1176, 1112.

#### 1-Benzyl-4-(4'-propyl-[1,1'-biphenyl]-4-yl)-2,5-dihydro-1H-pyrrole-3-sulfonyl fluoride (4ii)

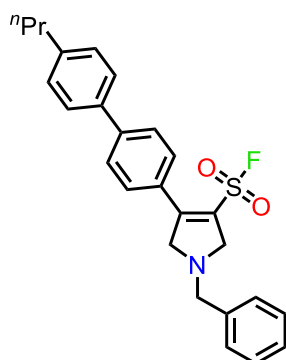

Following general procedure K, the title compound was isolated by flash column chromatography (0-10% EtOAc in petroleum ether) as a white solid (35.0 mg, 80%). **m.p.** 123 - 125 °C **<sup>1</sup>H NMR** (400 MHz, CDCl<sub>3</sub>) δ 7.63 (appt. d, *J* = 8.3 Hz, 2H), 7.54 – 7.46 (m, 4H), 7.40 – 7.25 (m, 7H), 4.10 (s, 4H), 3.89 (s, 2H), 2.67 – 2.61 (m, 2H), 1.75 – 1.64 (m, 2H), 0.98 (t, *J* = 7.3 Hz, 3H); **<sup>13</sup>C NMR** (101 MHz, CDCl<sub>3</sub>) δ 155.8, 143.5, 142.9, 137.8, 137.3, 129.2, 129.0, 128.8, 128.8, 127.8, 127.1, 127.0, 125.0 (d, *J* = 26.7 Hz), 65.3, 61.0, 59.8, 37.8, 24.6, 14.0; **<sup>19</sup>F NMR** (376 MHz, CDCl<sub>3</sub>) δ 63.9; **HRMS** (ESI<sup>+</sup>): calculated for C<sub>26</sub>H<sub>27</sub>FNO<sub>2</sub>S [M+H<sup>+</sup>]: *m/z* = 436.1741, *m/z* found 436.1727; **IR** *v*<sub>max</sub> (ATR)/cm<sup>-1</sup>: 2870, 2800, 1603, 1402, 1201, 1155.

**1-Benzyl-4-(4-(trifluoromethyl)phenyl)-2,5-dihydro-1H-pyrrole-3-sulfonyl fluoride (4ij)**

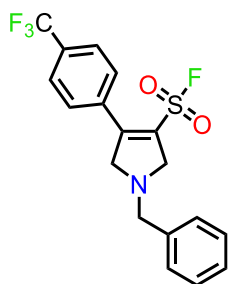

Following general procedure K, the title compound was isolated by flash column chromatography (0-10% EtOAc in petroleum ether) as a white solid (36.0 mg, 94%). **m.p.** 72 - 73 °C; **<sup>1</sup>H NMR** (400 MHz, CDCl<sub>3</sub>) δ 7.68 (d, *J* = 8.2 Hz, 2H), 7.51 (d, *J* = 8.2 Hz, 2H), 7.40 – 7.29 (m, 5H), 4.12 (t, *J* = 4.6 Hz, 2H), 4.07 (dd, *J* = 3.9, 2.4 Hz, 2H), 3.89 (s, 2H); **<sup>13</sup>C NMR** (101 MHz, CDCl<sub>3</sub>) δ 154.6 (d, *J* = 3.2 Hz), 137.6, 134.2, 132.3 (q, *J* = 32.9 Hz), 128.9, 128.7, 128.5 (d, *J* = 0.8 Hz), 127.9, 127.7 (d, *J* = 27.5 Hz), 125.6 (q, *J* = 3.7 Hz), 123.8 (q, *J* = 272.5 Hz), 65.4 (d, *J* = 1.4 Hz), 60.7, 59.7; **<sup>19</sup>F NMR** (376 MHz, CDCl<sub>3</sub>) δ 63.6, -63.0; **HRMS** (ESI<sup>+</sup>): calculated for C<sub>18</sub>H<sub>16</sub>F<sub>4</sub>NO<sub>2</sub>S [M+H<sup>+</sup>]: *m/z* = 386.0832, *m/z* found 386.0839; **IR** *v*<sub>max</sub> (ATR)/cm<sup>-1</sup>: 2928, 2802, 1616, 1409, 1320, 1206, 1172, 1124, 1067.

## Synthesis and experimental data for compounds 4ja-4jl

### General Procedure L

To a solution of the required azomethine imine **3j** (100  $\mu$ mol) in  $\text{CDCl}_3$  (1.00 mL) was added the required SASF **2** (100  $\mu$ mol). The reaction vial was sealed and irradiated with microwaves at 100  $^\circ\text{C}$  for 0.5 h. The solvent was then removed under reduced pressure and the crude product was purified by flash column chromatography to obtain the analytically pure product.

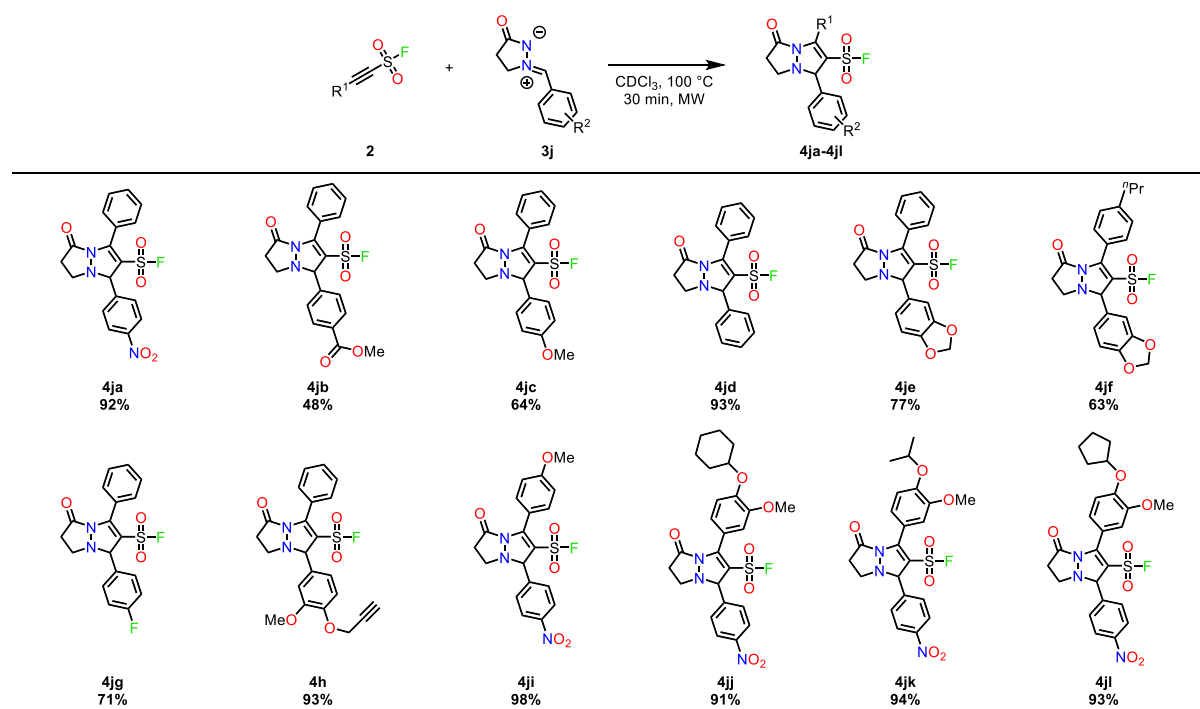

### 1-(4-Nitrophenyl)-5-oxo-3-phenyl-6,7-dihydro-1H,5H-pyrazolo[1,2-a]pyrazole-2-sulfonyl fluoride (**4ja**)

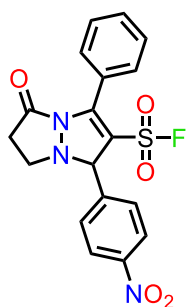

Following general procedure L (250  $\mu$ mol of SASF), the title compound was isolated by flash column chromatography (0-50% EtOAc in petroleum ether) as a yellow foam (93.0 mg, 92%). **m.p.** 72 - 74  $^\circ\text{C}$ ;  **$^1\text{H NMR}$**  (400 MHz,  $\text{CDCl}_3$ )  $\delta$  8.32 (appt. d,  $J = 8.8$  Hz, 2H), 7.77 (appt. d,  $J = 8.8$  Hz, 2H), 7.62 - 7.56 (m, 3H), 7.54 - 7.48 (m, 2H), 5.52 (s, 1H), 3.47 (appt. td,  $J = 8.4, 2.8$  Hz, 1H), 3.21 (ddd,  $J = 11.2, 8.8, 7.5$  Hz, 1H), 3.00 (ddd,  $J = 17.0, 11.2, 8.2$  Hz, 1H), 2.86 (ddd,  $J = 17.0, 7.5, 2.8$  Hz, 1H);  **$^{13}\text{C NMR}$**  (101 MHz,  $\text{CDCl}_3$ )  $\delta$  164.8, 148.8, 148.6 (d,  $J = 2.7$  Hz), 143.6, 132.2, 129.9, 129.8, 128.3, 124.1, 123.2, 110.3 (d,  $J = 29.1$  Hz), 73.4, 51.0, 36.0;  **$^{19}\text{F NMR}$**  (376 MHz,



$\text{CDCl}_3$ )  $\delta$  73.0; **HRMS** (ESI<sup>+</sup>): calculated for  $\text{C}_{18}\text{H}_{14}\text{FN}_3\text{O}_5\text{SNa}$  [ $\text{M}+\text{Na}^+$ ]:  $m/z = 426.0530$ ,  $m/z$  found 426.0531; **IR**  $\nu_{\text{max}}$  (ATR)/ $\text{cm}^{-1}$ : 2927, 2855, 1739, 1520, 1404, 1345, 1190.

**Methyl 4-(2-(fluorosulfonyl)-5-oxo-3-phenyl-6,7-dihydro-1H,5H-pyrazolo[1,2- $\alpha$ ]pyrazol-1-yl)benzoate (4jb)**

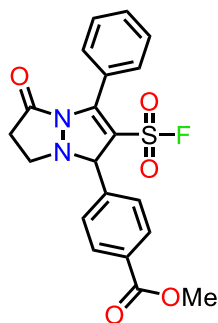

Following general procedure L, the title compound was isolated by flash column chromatography (0-40% EtOAc in petroleum ether) as a yellow foam (24.0 mg, 58%). **m.p.** 70 - 72 °C; **<sup>1</sup>H NMR** (400 MHz,  $\text{CDCl}_3$ )  $\delta$  8.14 (d,  $J = 8.4$  Hz, 2H), 7.64 – 7.55 (m, 5H), 7.50 (appt. t,  $J = 7.4$  Hz, 2H), 5.48 (s, 1H), 3.95 (s, 3H), 3.34 (appt. td,  $J = 7.9, 4.7$  Hz, 1H), 3.17 (dd,  $J = 17.4, 9.1$  Hz, 1H), 2.98 – 2.82 (m, 2H); **<sup>13</sup>C NMR** (101 MHz,  $\text{CDCl}_3$ )  $\delta$  166.6, 164.9, 148.2 (d,  $J = 2.8$  Hz), 140.7, 132.1, 131.5, 130.3, 129.9, 129.0, 128.3, 123.5, 111.2 (d,  $J = 28.8$  Hz), 73.2, 52.4, 50.1, 36.2; **<sup>19</sup>F NMR** (376 MHz,  $\text{CDCl}_3$ )  $\delta$  72.7; **HRMS** (ESI<sup>+</sup>): calculated for  $\text{C}_{20}\text{H}_{18}\text{FN}_2\text{O}_5\text{S}$  [ $\text{M}+\text{H}^+$ ]:  $m/z = 417.0915$ ,  $m/z$  found 417.0908; **IR**  $\nu_{\text{max}}$  (ATR)/ $\text{cm}^{-1}$ : 2927, 2856, 1719, 1612, 1404, 1365, 1278, 1190.

**1-(4-Methoxyphenyl)-5-oxo-3-phenyl-6,7-dihydro-1H,5H-pyrazolo[1,2- $\alpha$ ]pyrazole-2-sulfonyl fluoride (4jc)**

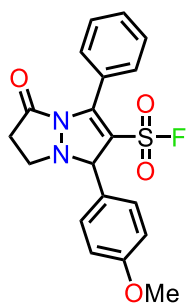

Following general procedure L, the title compound was isolated by flash column chromatography (0-40% EtOAc in petroleum ether) as a yellow foam (25.0 mg, 64%). **m.p.** 108 - 110 °C; **<sup>1</sup>H NMR** (400 MHz,  $\text{CDCl}_3$ )  $\delta$  7.64 – 7.55 (m, 3H), 7.50 (appt. t,  $J = 7.4$  Hz, 2H), 7.41 (d,  $J = 8.7$  Hz, 2H), 6.99 (d,  $J = 8.7$  Hz, 2H), 5.43 (s, 1H), 3.85 (s, 3H), 3.21 – 3.06 (m, 2H), 2.95 – 2.77 (m, 2H); **<sup>13</sup>C NMR** (101 MHz,  $\text{CDCl}_3$ )  $\delta$  165.1, 160.8, 147.6, 132.1, 130.2, 130.0, 128.3, 126.7, 123.8, 114.6, 112.1 (d,  $J = 28.1$  Hz), 72.0, 55.5, 48.4, 36.4; **<sup>19</sup>F NMR** (376 MHz,  $\text{CDCl}_3$ )  $\delta$  72.8; **HRMS** (ESI<sup>+</sup>): calculated for  $\text{C}_{19}\text{H}_{18}\text{FN}_2\text{O}_4\text{S}$  [ $\text{M}+\text{H}^+$ ]:  $m/z = 389.0966$ ,  $m/z$  found 389.0960; **IR**  $\nu_{\text{max}}$  (ATR)/ $\text{cm}^{-1}$ : 2934, 1727, 1610, 1404, 1369, 1191.

**5-Oxo-1,3-diphenyl-6,7-dihydro-1*H*,5*H*-pyrazolo[1,2-*a*]pyrazole-2-sulfonyl fluoride (4jd)**

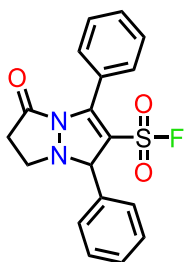

Following general procedure L (250  $\mu$ mol of the required SASF), the title compound was isolated by flash column chromatography (0-40% EtOAc in petroleum ether) as a yellow foam (84.0 mg, 93%). **m.p.** 58 - 60  $^{\circ}$ C;  **$^1$ H NMR** (400 MHz,  $\text{CDCl}_3$ )  $\delta$  7.64 – 7.55 (m, 3H), 7.53 – 7.43 (m, 7H), 5.46 (s, 1H), 3.26 – 3.18 (m, 1H), 3.12 (appt. td,  $J$  = 8.8, 4.4 Hz, 1H), 2.93 – 2.79 (m, 2H);  **$^{13}$ C NMR** (101 MHz,  $\text{CDCl}_3$ )  $\delta$  165.0, 147.8 (d,  $J$  = 2.7 Hz), 135.1, 132.0, 129.9, 129.8, 129.2, 128.9, 128.3, 123.7, 111.9 (d,  $J$  = 28.5 Hz), 72.9, 49.0, 36.4;  **$^{19}$ F NMR** (376 MHz,  $\text{CDCl}_3$ )  $\delta$  72.7; **HRMS** (ESI $^+$ ): calculated for  $\text{C}_{18}\text{H}_{16}\text{FN}_2\text{O}_3\text{S}$  [ $\text{M}+\text{H}^+$ ]:  $m/z$  = 359.0855,  $m/z$  found 359.0861; **IR**  $\nu_{\text{max}}$  (ATR)/ $\text{cm}^{-1}$ : 2926, 1736, 1571, 1402, 1364, 1191.

**1-(Benzo[*d*][1,3]dioxol-5-yl)-5-oxo-3-phenyl-6,7-dihydro-1*H*,5*H*-pyrazolo[1,2-*a*]pyrazole-2-sulfonyl fluoride (4je)**

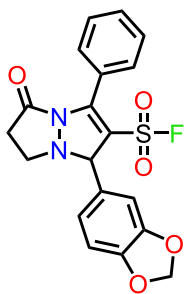

Following general procedure L, the title compound was isolated by flash column chromatography (0-60% EtOAc in petroleum ether) as a yellow foam (37.0 mg, 92%). **m.p.** 172 - 173  $^{\circ}$ C;  **$^1$ H NMR** (400 MHz,  $\text{CDCl}_3$ )  $\delta$  7.63 – 7.55 (m,  $J$  = 7.5, 6.8, 4.1 Hz, 3H), 7.53 – 7.47 (appt. dd,  $J$  = 11.4, 4.4 Hz, 2H), 7.00 (d,  $J$  = 1.6 Hz, 1H), 6.94 (dd,  $J$  = 8.0, 1.7 Hz, 1H), 6.87 (d,  $J$  = 7.9 Hz, 1H), 6.03 (s, 2H), 5.39 (s, 1H), 3.23 (appt. td,  $J$  = 8.3, 6.4 Hz, 1H), 3.11 (dd,  $J$  = 16.5, 8.4 Hz, 1H), 2.95 – 2.79 (m, 2H);  **$^{13}$ C NMR** (101 MHz,  $\text{CDCl}_3$ )  $\delta$  164.9, 148.9, 148.6, 147.7, 132.1, 129.9, 128.7, 128.3, 123.7, 122.9, 111.8 (d,  $J$  = 28.3 Hz), 108.8, 108.7, 101.7, 72.4, 48.6, 36.4;  **$^{19}$ F NMR** (376 MHz,  $\text{CDCl}_3$ )  $\delta$  72.8; **HRMS** (ESI $^+$ ): calculated for  $\text{C}_{19}\text{H}_{16}\text{FN}_2\text{O}_5\text{S}$  [ $\text{M}+\text{H}^+$ ]:  $m/z$  = 403.0753,  $m/z$  found 403.0748; **IR**  $\nu_{\text{max}}$  (ATR)/ $\text{cm}^{-1}$ : 2926, 1722, 1411, 1371, 1252, 1193.

**1-(Benzo[d][1,3]dioxol-5-yl)-5-oxo-3-(4-propylphenyl)-6,7-dihydro-1*H*,5*H*-pyrazolo[1,2-*a*]pyrazole-2-sulfonyl fluoride (4jf)**

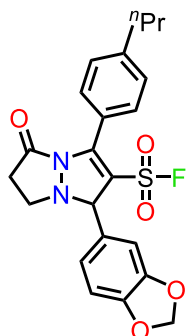

Following general procedure L, the title compound was isolated by flash column chromatography (0-40% EtOAc in petroleum ether) as a yellow foam (29.0 mg, 65%). **m.p.** 144 - 145 °C; **<sup>1</sup>H NMR** (400 MHz, CDCl<sub>3</sub>) δ 7.53 (appt. d, *J* = 8.2 Hz, 2H), 7.29 (appt. d, *J* = 8.3 Hz, 2H), 6.97 (d, *J* = 1.6 Hz, 1H), 6.92 (dd, *J* = 7.9, 1.7 Hz, 1H), 6.87 (d, *J* = 7.9 Hz, 1H), 6.03 (s, 1H), 5.37 (s, 1H), 3.19 (dd, *J* = 15.5, 8.5 Hz, 1H), 3.10 (dd, *J* = 16.8, 7.8 Hz, 1H), 2.95 – 2.77 (m, 1H), 2.71 – 2.63 (m, 1H), 1.75 – 1.65 (m, 1H), 0.98 (t, *J* = 7.3 Hz, 2H); **<sup>13</sup>C NMR** (101 MHz, CDCl<sub>3</sub>) δ 165.0, 148.9, 148.6, 148.1 (d, *J* = 2.6 Hz), 147.4, 130.1, 128.7, 128.3, 122.9, 120.7, 111.3 (d, *J* = 28.2 Hz), 108.8, 108.7, 101.7, 72.2, 48.3, 38.3, 36.4, 24.1, 14.0; **<sup>19</sup>F NMR** (376 MHz, CDCl<sub>3</sub>) δ 73.0; **HRMS** (ESI<sup>+</sup>): calculated for C<sub>22</sub>H<sub>22</sub>FN<sub>2</sub>O<sub>5</sub>S [M+H<sup>+</sup>]: *m/z* = 445.1222, *m/z* found 445.1221; **IR** *v*<sub>max</sub> (ATR)/cm<sup>-1</sup>: 2926, 1731, 1504, 1407, 1358, 1178.

**1-(4-Fluorophenyl)-5-oxo-3-phenyl-6,7-dihydro-1*H*,5*H*-pyrazolo[1,2-*a*]pyrazole-2-sulfonyl fluoride (4jg)**

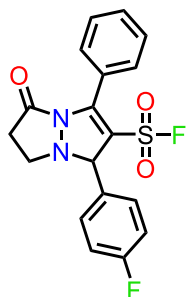

Following general procedure L, the title compound was isolated by flash column chromatography (0-40% EtOAc in petroleum ether) as a yellow foam (29.0 mg, 77%). **m.p.** 121 - 123 °C; **<sup>1</sup>H NMR** (500 MHz, CDCl<sub>3</sub>) δ 7.62 – 7.55 (m, 3H), 7.54 – 7.47 (m, 4H), 7.19 – 7.13 (m, 2H), 5.44 (s, 1H), 3.29 (ddd, *J* = 9.0, 7.3, 5.7 Hz, 1H), 3.16 – 3.09 (m, 1H), 2.91 – 2.86 (m, 2H); **<sup>13</sup>C NMR** (126 MHz, CDCl<sub>3</sub>) δ 164.9, 163.5 (d, *J* = 249.0 Hz), 147.9, 132.1, 131.4 (d, *J* = 3.1 Hz), 130.7 (d, *J* = 8.5 Hz), 129.9, 128.8 (d, *J* = 7.7 Hz), 128.3, 123.6, 116.1 (d, *J* = 21.8 Hz), 111.6 (d, *J* = 28.6 Hz), 72.6, 49.5, 36.3; **<sup>19</sup>F NMR** (376 MHz, CDCl<sub>3</sub>) δ 72.62, -111.6; **HRMS** (ESI<sup>+</sup>): calculated for C<sub>18</sub>H<sub>15</sub>F<sub>2</sub>N<sub>2</sub>O<sub>3</sub>S [M+H<sup>+</sup>]: *m/z* = 377.0760, *m/z* found 377.0755; **IR** *v*<sub>max</sub> (ATR)/cm<sup>-1</sup>: 2924, 1735, 1605, 1508, 1404, 1369, 1189.

**1-(3-Methoxy-4-(prop-2-yn-1-yloxy)phenyl)-5-oxo-3-phenyl-6,7-dihydro-1H,5H-pyrazolo[1,2-*a*]pyrazole-2-sulfonyl fluoride (4jh)**

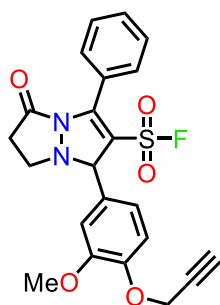

Following general procedure L (250  $\mu$ mol of the required SASF), the title compound was isolated by flash column chromatography (0-50% EtOAc in petroleum ether) as a yellow foam (103 mg, 93%). **m.p.** 62 - 63 °C; **<sup>1</sup>H NMR** (400 MHz, CDCl<sub>3</sub>)  $\delta$  7.64 – 7.55 (m, 3H), 7.52 – 7.47 (m, 2H), 7.11 (d, *J* = 8.2 Hz, 1H), 7.06 – 7.01 (m, 2H), 5.41 (s, 1H), 4.81 (d, *J* = 2.4 Hz, 2H), 3.93 (s, 3H), 3.23 (appt. td, *J* = 8.1, 6.2 Hz, 1H), 3.11 (dd, *J* = 16.6, 8.6 Hz, 1H), 2.94 – 2.80 (m, 2H), 2.55 (t, *J* = 2.4 Hz, 1H); **<sup>13</sup>C NMR** (126 MHz, CDCl<sub>3</sub>)  $\delta$  165.0, 150.1, 148.1, 147.7, 132.1, 129.9, 128.5, 128.3, 123.7, 121.4, 114.0, 112.0, 111.8 (d, *J* = 28.4 Hz), 78.4, 76.3, 72.6, 56.8, 56.2, 48.8, 36.4; **<sup>19</sup>F NMR** (376 MHz, CDCl<sub>3</sub>)  $\delta$  72.6; **HRMS** (ESI<sup>+</sup>): calculated for C<sub>22</sub>H<sub>20</sub>FN<sub>2</sub>O<sub>5</sub>S [M+H<sup>+</sup>]: *m/z* = 443.1071, *m/z* found 443.1060; **IR**  $\nu_{\text{max}}$  (ATR)/cm<sup>-1</sup>: 3284, 2936, 1733, 1511, 1402, 1365, 1191.

**3-(4-Methoxyphenyl)-1-(4-nitrophenyl)-5-oxo-6,7-dihydro-1H,5H-pyrazolo[1,2-*a*]pyrazole-2-sulfonyl fluoride (4ji)**

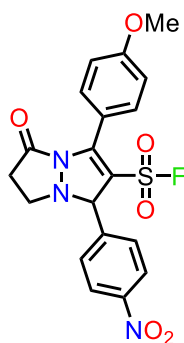

Following general procedure L, the title compound was isolated by flash column chromatography (0-40% EtOAc in petroleum ether) as a yellow foam (42.0 mg, 98%). **m.p.** 65 - 66 °C; **<sup>1</sup>H NMR** (400 MHz, CDCl<sub>3</sub>)  $\delta$  8.31 (appt. d, *J* = 8.6 Hz, 2H), 7.74 (appt. d, *J* = 8.7 Hz, 2H), 7.58 (appt. d, *J* = 8.7 Hz, 2H), 7.00 (appt. d, *J* = 8.8 Hz, 2H), 5.48 (s, 1H), 3.88 (s, 3H), 3.41 (appt. td, *J* = 8.5, 3.4 Hz, 1H), 3.22 – 3.13 (m, 1H), 2.98 (ddd, *J* = 18.9, 10.7, 8.3 Hz, 1H), 2.86 (ddd, *J* = 16.8, 7.6, 3.2 Hz, 1H); **<sup>13</sup>C NMR** (101 MHz, CDCl<sub>3</sub>)  $\delta$  165.0, 162.9, 148.8, 148.7, 143.6, 132.2, 130.0, 124.1, 114.7, 113.8, 108.9 (d, *J* = 28.5 Hz), 73.3, 55.5, 50.7, 36.1; **<sup>19</sup>F NMR** (376 MHz, CDCl<sub>3</sub>)  $\delta$  73.4; **HRMS** (ESI<sup>+</sup>):

calculated for  $C_{19}H_{17}FN_3O_6S$  [ $M+H^+$ ]:  $m/z = 434.0817$ ,  $m/z$  found 434.0832; IR  $\nu_{max}$  (ATR)/ $cm^{-1}$ : 2925, 2853, 1738, 1607, 1504, 1345, 1174.

**3-(4-(Cyclohexyloxy)-3-methoxyphenyl)-1-(4-nitrophenyl)-5-oxo-6,7-dihydro-1H,5H-pyrazolo[1,2-*a*]pyrazole-2-sulfonyl fluoride (4jj)**

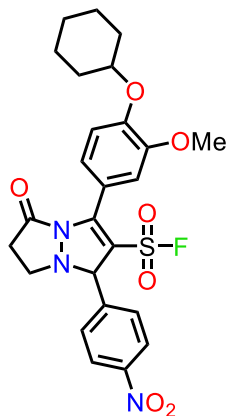

Following general procedure L, the title compound was isolated by flash column chromatography (0-60% EtOAc in petroleum ether) as a yellow foam (48.0 mg, 91%). **m.p.** 76 - 78 °C;  **$^1H$  NMR** (400 MHz,  $CDCl_3$ )  $\delta$  8.30 (appt. d,  $J = 8.7$  Hz, 2H), 7.74 (appt. d,  $J = 8.7$  Hz, 2H), 7.22 (dd,  $J = 8.4, 2.1$  Hz, 1H), 7.13 (d,  $J = 2.1$  Hz, 1H), 6.95 (d,  $J = 8.6$  Hz, 1H), 5.48 (s, 1H), 4.37 - 4.28 (m, 1H), 3.88 (s, 3H), 3.40 (appt. td,  $J = 8.4, 3.5$  Hz, 1H), 3.23 - 3.13 (m, 1H), 2.98 (ddd,  $J = 18.6, 10.4, 8.2$  Hz, 1H), 2.87 (ddd,  $J = 16.8, 7.7, 3.5$  Hz, 1H), 2.07 (dd,  $J = 9.6, 6.5$  Hz, 2H), 1.90 - 1.79 (m, 2H), 1.67 - 1.55 (m, 2H), 1.45 - 1.22 (m, 4H);  **$^{13}C$  NMR** (101 MHz,  $CDCl_3$ )  $\delta$  164.9, 151.3, 149.3, 148.8, 148.7, 143.7, 130.0, 124.4, 124.1, 114.2, 114.2, 113.2, 108.8 (d,  $J = 28.3$  Hz), 77.1, 73.3, 56.3, 50.5, 36.2, 32.0, 25.6, 24.2;  **$^{19}F$  NMR** (376 MHz,  $CDCl_3$ )  $\delta$  73.8; **HRMS** ( $ESI^+$ ): calculated for  $C_{25}H_{27}FN_3O_7S$  [ $M+H^+$ ]:  $m/z = 532.1548$ ,  $m/z$  found 532.1538; IR  $\nu_{max}$  (ATR)/ $cm^{-1}$ : 2933, 2857, 1735, 1503, 1344, 1189.

**3-(4-Isopropoxy-3-methoxyphenyl)-1-(4-nitrophenyl)-5-oxo-6,7-dihydro-1H,5H-pyrazolo[1,2-*a*]pyrazole-2-sulfonyl fluoride (4jk)**

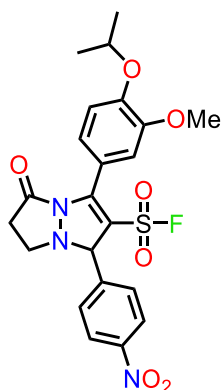

Following general procedure L, the title compound was isolated by flash column chromatography (0-60% EtOAc in petroleum ether) as a yellow foam (46.0 mg, 94%). **m.p.** 58 - 60 °C; **<sup>1</sup>H NMR** (400 MHz, CDCl<sub>3</sub>) δ 8.31 (appt. d, *J* = 8.7 Hz, 2H), 7.74 (appt. d, *J* = 8.7 Hz, 2H), 7.23 (dd, *J* = 8.4, 2.1 Hz, 1H), 7.13 (d, *J* = 2.1 Hz, 1H), 6.94 (d, *J* = 8.6 Hz, 1H), 5.48 (s, 1H), 4.66 (hept, *J* = 6.2 Hz, 1H), 3.89 (s, 3H), 3.40 (appt. td, *J* = 8.4, 3.5 Hz, 1H), 3.19 (appt. dt, *J* = 10.4, 8.3 Hz, 1H), 2.98 (ddd, *J* = 18.8, 10.6, 8.2 Hz, 1H), 2.87 (ddd, *J* = 16.9, 7.7, 3.5 Hz, 1H), 1.43 (d, *J* = 6.1 Hz, 6H); **<sup>13</sup>C NMR** (101 MHz, CDCl<sub>3</sub>) δ 164.9, 151.4, 149.2, 148.8, 148.7, 143.7, 130.0, 124.4, 124.1, 114.3, 114.0, 112.8, 108.9 (d, *J* = 28.4 Hz), 73.3, 71.4, 56.3, 50.6, 36.2, 22.1, 22.1; **<sup>19</sup>F NMR** (376 MHz, CDCl<sub>3</sub>) δ 73.7; **HRMS** (ESI<sup>+</sup>): calculated for C<sub>22</sub>H<sub>23</sub>FN<sub>3</sub>O<sub>7</sub>S [M+H<sup>+</sup>]: *m/z* = 492.1235, *m/z* found 492.1223; **IR** *v*<sub>max</sub> (ATR)/cm<sup>-1</sup>: 2925, 2854, 1742, 1504, 1346, 1190.

**3-(4-(Cyclopentyloxy)-3-methoxyphenyl)-1-(4-nitrophenyl)-5-oxo-6,7-dihydro-1H,5H-pyrazolo[1,2-*a*]pyrazole-2-sulfonyl fluoride (4jl)**

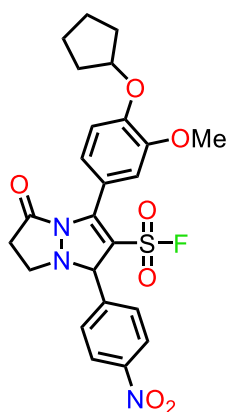

Following general procedure L, the title compound was isolated by flash column chromatography (0-60% EtOAc in petroleum ether) as a yellow foam (48.0 mg, 93%). **m.p.** 64 - 66 °C; **<sup>1</sup>H NMR** (400 MHz, CDCl<sub>3</sub>) δ 8.31 (appt. d, *J* = 8.7 Hz, 2H), 7.74 (appt. d, *J* = 8.7 Hz, 2H), 7.23 (dd, *J* = 8.4, 2.1 Hz, 1H), 7.12 (d, *J* = 2.1 Hz, 1H), 6.93 (d, *J* = 8.5 Hz, 1H), 5.48 (s, 1H), 4.88 – 4.82 (m, 1H), 3.88 (s, 3H), 3.40 (appt. td, *J* = 8.5, 3.7 Hz, 1H), 3.23 – 3.14 (m, 1H), 2.98

(ddd,  $J = 18.6, 10.6, 8.2$  Hz, 1H), 2.88 (ddd,  $J = 16.8, 7.7, 3.6$  Hz, 1H), 2.03 – 1.91 (m, 4H), 1.91 – 1.80 (m, 2H), 1.70 – 1.58 (m, 2H);  $^{13}\text{C NMR}$  (101 MHz,  $\text{CDCl}_3$ )  $\delta$  164.9, 151.8, 149.1, 148.9 (d,  $J = 2.2$  Hz), 148.7, 143.7, 130.0, 124.4, 124.1, 114.1, 114.0, 112.8, 108.8 (d,  $J = 28.4$  Hz), 80.7, 73.3, 56.3, 50.5, 36.1, 33.0 (d,  $J = 2.8$  Hz), 24.3;  $^{19}\text{F NMR}$  (376 MHz,  $\text{CDCl}_3$ )  $\delta$  73.8; **HRMS** ( $\text{ESI}^+$ ): calculated for  $\text{C}_{24}\text{H}_{25}\text{FN}_3\text{O}_7\text{S}$  [ $\text{M}+\text{H}^+$ ]:  $m/z = 518.1392$ ,  $m/z$  found 518.1383; **IR**  $\nu_{\text{max}}$  (ATR)/ $\text{cm}^{-1}$ : 2963, 1742, 1503, 1345, 1189.

## Synthesis and experimental data for compounds 4ka-4kj

### General Procedure M

A solution of the required SASF **2** (100  $\mu\text{mol}$ ) and the required azomethine imine **3k** (100  $\mu\text{mol}$ ) in DCE (1.00 mL) was stirred at room temperature for 4 h. The solvent was then removed under reduced pressure and the crude product was purified by flash column chromatography to obtain the analytically pure product.

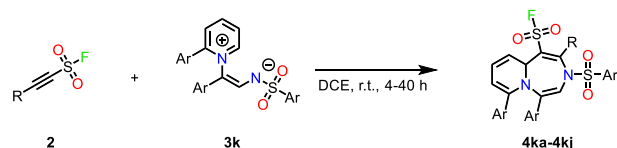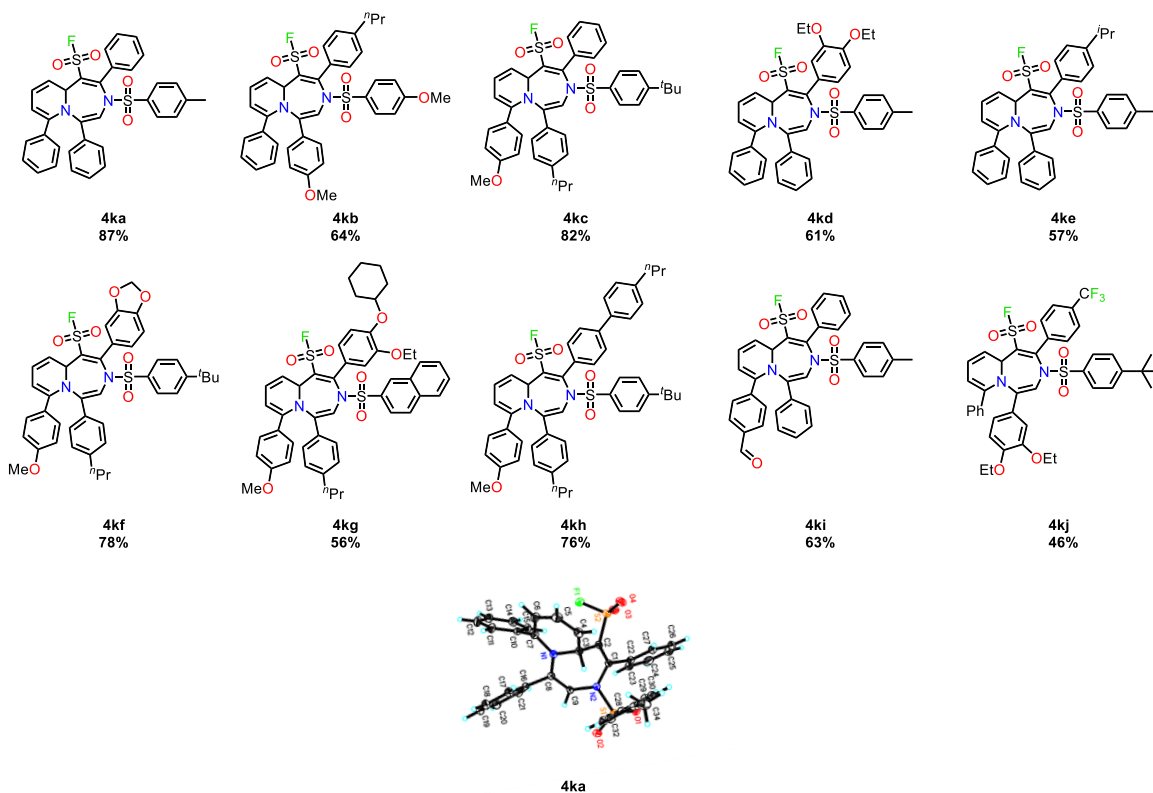

### 2,5,7-Triphenyl-3-tosyl-3,10a-dihydropyrido[1,2-d][1,4]diazepine-1-sulfonyl fluoride (4ka)

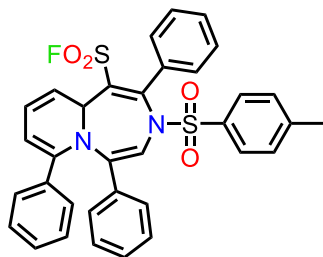

Following general procedure M, the title compound was isolated after purification by flash column chromatography (0-10% EtOAc in petroleum ether) as a purple solid (53.0 mg, 87%). **m.p.** 148 – 149 °C; **<sup>1</sup>H NMR** (500 MHz, CDCl<sub>3</sub>) δ = 7.58 – 7.53 (m, 3H), 7.47 – 7.41 (m, 2H), 7.41 – 7.36 (m, 2H), 7.33 – 7.27 (m, 2H), 7.07 – 6.98 (m, 3H), 6.98 – 6.87 (m, 5H), 6.82 (dt, *J* = 15.6, 7.0 Hz, 2H), 5.99 (s, 1H), 5.46 – 5.39 (m, 1H), 5.33 (dd, *J* = 5.9, 1.4 Hz, 1H), 5.23 (d, *J* = 5.6 Hz, 1H), 2.49 (s, 3H); **<sup>13</sup>C NMR** (126 MHz, CDCl<sub>3</sub>) δ = 157.3 (d, *J* = 5.7 Hz), 145.4, 140.8, 138.8, 138.1, 137.6 (d, *J* = 25.6 Hz), 137.1, 134.8, 134.3, 131.7, 130.8, 130.1, 128.2, 128.0, 127.9, 127.8, 127.5, 127.4, 127.2, 126.5, 126.2, 114.4, 109.6, 106.2, 56.8, 21.9; **<sup>19</sup>F NMR** (376 MHz, CDCl<sub>3</sub>) δ 63.5; **HRMS** (ESI<sup>+</sup>): calculated for C<sub>34</sub>H<sub>28</sub>FN<sub>2</sub>O<sub>4</sub>S<sub>2</sub> [M+H<sup>+</sup>]: *m/z* = 611.1469, *m/z* found 611.1462; **IR** *v*<sub>max</sub> (ATR)/cm<sup>-1</sup>: 2988, 2803, 1565, 1394, 1370, 1175, 1148, 750.

### 5-(4-Methoxyphenyl)-3-((4-methoxyphenyl)sulfonyl)-7-phenyl-2-(4-propylphenyl)-3,10a-dihydropyrido[1,2-d][1,4]diazepine-1-sulfonyl fluoride (4kb)

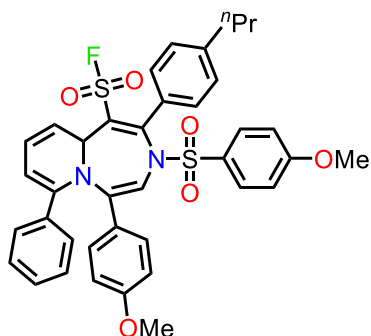

Following general procedure M, the title compound was isolated after purification by flash column chromatography (0-15% EtOAc in petroleum ether) as a purple solid (45.0 mg, 64%). **m.p.** 148 - 150 °C; **<sup>1</sup>H NMR** (500 MHz, CDCl<sub>3</sub>) δ = 7.46 – 7.40 (m, 4H), 7.24 (appt. d, *J* = 8.3 Hz, 2H), 6.98 – 6.90 (m, 5H), 6.85 – 6.78 (m, 4H), 6.54 (appt. d, *J* = 8.9 Hz, 2H), 6.25 (ddd, *J* = 9.4, 5.7, 1.5 Hz, 1H), 5.90 (s, 1H), 5.47 (ddd, *J* = 9.3, 6.0, 0.4 Hz, 1H), 5.39 (dd, *J* = 5.9, 1.3 Hz, 1H), 5.21 (d, *J* = 5.6 Hz, 1H), 3.91 (s, 3H), 3.71 (s, 3H), 2.71 – 2.65 (m, 2H), 1.76 – 1.68 (m, 2H), 1.01 (t, *J* = 7.3 Hz, 3H); **<sup>13</sup>C NMR** (126 MHz, CDCl<sub>3</sub>) δ = 164.1, 159.2, 157.8 (d, *J* = 5.6 Hz), 147.0, 140.9, 139.1, 136.7, 136.8 – 136.5 (m), 132.3, 130.8, 130.7, 129.8, 129.1, 128.7, 128.3, 127.9, 127.2, 126.4, 126.0, 114.6, 114.6, 113.5, 108.8, 106.2, 56.8, 56.0, 55.4, 38.2, 24.4, 14.0; **<sup>19</sup>F NMR** (376 MHz, CDCl<sub>3</sub>) δ = 63.4 **HRMS** (ESI<sup>+</sup>): calculated for C<sub>38</sub>H<sub>36</sub>FN<sub>2</sub>O<sub>6</sub>S<sub>2</sub> [M+H<sup>+</sup>]: *m/z* = 699.1993, *m/z* found 699.1995; **IR** *v*<sub>max</sub> (ATR)/cm<sup>-1</sup>: 3027, 2888, 1593, 1575, 1393, 1373, 1248, 1168.



**3-((4-(*tert*-Butyl)phenyl)sulfonyl)-7-(4-methoxyphenyl)-2-phenyl-5-(4-propylphenyl)-3,10a-dihydropyrido[1,2-*d*][1,4]diazepine-1-sulfonyl fluoride (4kc)**

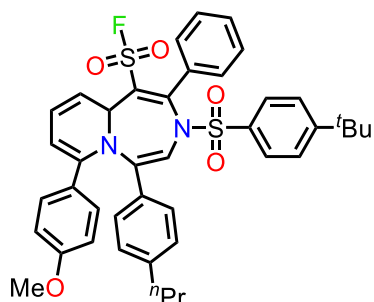

Following general procedure M, the title compound was isolated after purification by flash column chromatography (0-10% EtOAc in petroleum ether) as a purple solid (59.0 mg, 82%). **m.p.** 116 - 117 °C; **<sup>1</sup>H NMR** (500 MHz, CDCl<sub>3</sub>) δ = 7.55 – 7.49 (m, 5H), 7.46 – 7.38 (m, 4H), 6.86 – 6.79 (m, 4H), 6.73 (appt. d, *J* = 8.5 Hz, 1H), 6.48 (appt. d, *J* = 8.8 Hz, 1H), 6.21 (ddd, *J* = 9.4, 5.7, 1.5 Hz, 1H), 5.31 (dd, *J* = 9.4, 5.9 Hz, 1H), 5.18 (dd, *J* = 5.9, 1.2 Hz, 1H), 5.14 (d, *J* = 5.6 Hz, 1H), 3.66 (s, 3H), 2.46 (t, *J* = 7.4 Hz, 2H), 1.59 – 1.51 (m, 2H), 1.39 (s, 9H), 0.87 (t, *J* = 7.4 Hz, 3H); **<sup>13</sup>C NMR** (126 MHz, CDCl<sub>3</sub>) δ = 158.8, 158.4, 157.3 (d, *J* = 5.5 Hz), 142.2, 140.7, 137.6 (d, *J* = 26.0 Hz), 137.3, 135.6, 134.9, 134.1, 131.7, 131.6, 130.8, 128.1, 127.5, 127.3, 127.2, 126.5, 113.8, 113.4, 109.1, 105.2, 56.8, 55.3, 37.6, 35.5, 31.2, 24.6, 13.7; **<sup>19</sup>F NMR** (376 MHz, CDCl<sub>3</sub>) δ 63.22; **HRMS** (ESI<sup>+</sup>): calculated for C<sub>41</sub>H<sub>42</sub>FN<sub>2</sub>O<sub>5</sub>S<sub>2</sub> [M+H<sup>+</sup>]: *m/z* = 725.2514, *m/z* found 725.2513; **IR** ν<sub>max</sub> (ATR)/cm<sup>-1</sup>: 2963, 2871, 1603, 1579, 1508, 1400, 1372, 1247, 1172.

**2-(3,4-Diethoxyphenyl)-5,7-diphenyl-3-tosyl-3,10a-dihydropyrido[1,2-*d*][1,4]diazepine-1-sulfonyl fluoride (4kd)**

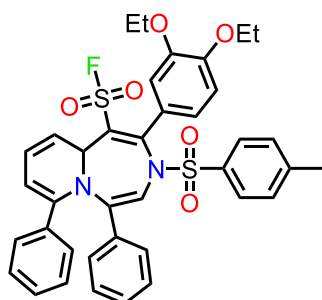

Following general procedure M (stirring for 20 h at room temperature), the title compound was isolated after purification by flash column chromatography (0-10% EtOAc in petroleum ether) as an orange solid (43.0 mg, 61%). **m.p.** 56 - 57 °C; **<sup>1</sup>H NMR** (500 MHz, CDCl<sub>3</sub>) δ = 7.41 (appt. d, *J* = 8.3 Hz, 2H), 7.31 (appt. d, *J* = 8.0 Hz, 2H), 7.09 (dd, *J* = 8.3, 2.1 Hz, 1H), 7.04 – 6.98 (m, 4H), 6.96 – 6.88 (m, 5H), 6.85 (d, *J* = 8.4 Hz, 1H), 6.83 – 6.78 (m, 2H), 6.24 (ddd, *J* = 9.5, 5.7, 1.6 Hz, 1H), 5.96 (s, 1H), 5.42 (dd, *J* = 9.2, 5.9 Hz, 1H), 5.24 (dd, *J* = 5.9, 1.5 Hz, 1H), 5.20 (d, *J* = 5.6 Hz, 1H), 4.21 – 4.06 (m, 4H), 2.49 (s, 3H), 1.52 (t, *J* = 7.0 Hz, 3H), 1.50 (t, *J* = 7.0 Hz, 3H); **<sup>13</sup>C NMR** (126 MHz, CDCl<sub>3</sub>) δ = 157.6, 152.5, 148.2, 145.3, 140.8, 139.0, 138.3, 137.3, 135.2 (d, *J* = 25.8 Hz), 134.6, 130.0, 127.9,

127.8, 127.7, 127.6, 127.5, 127.1, 126.8, 126.3, 126.3, 124.8, 116.1, 114.7, 111.8, 109.5, 106.0, 64.9, 64.6, 56.8, 21.9, 14.9, 14.9; <sup>19</sup>F NMR (376 MHz, CDCl<sub>3</sub>) δ = 63.1; HRMS (ESI<sup>+</sup>): calculated for C<sub>38</sub>H<sub>35</sub>FN<sub>2</sub>O<sub>6</sub>S<sub>2</sub> [M+H<sup>+</sup>]: m/z = 699.1993, m/z found 699.1991; IR ν<sub>max</sub> (ATR)/cm<sup>-1</sup>: 2924, 2857, 1595, 1565, 1509, 1403, 1374, 1273, 1171, 1052.

**2-(4-Isopropylphenyl)-5,7-diphenyl-3-tosyl-3,10a-dihydropyrido[1,2-d][1,4]diazepine-1-sulfonyl fluoride (4ke)**

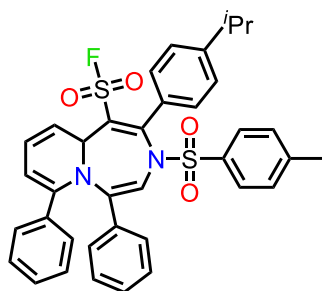

Following general procedure M (stirring for 7 h at room temperature), the title compound was isolated after purification by flash column chromatography (0-6% EtOAc in petroleum ether) as an orange solid (37.0 mg, 57%). **m.p.** 153 - 155 °C; <sup>1</sup>H NMR (500 MHz, CDCl<sub>3</sub>) δ = 7.43 (appt. d, J = 8.2 Hz, 2H), 7.35 (appt. d, J = 8.3 Hz, 2H), 7.28 - 7.24 (m, 4H), 7.04 - 6.99 (m, 3H), 6.97 - 6.87 (m, 5H), 6.84 - 6.79 (m, 2H), 6.26 (ddd, J = 9.3, 5.7, 1.4 Hz, 1H), 5.97 (s, 1H), 5.48 - 5.46 (ddd, J = 9.2, 6.0, 0.4 Hz, 1H), 5.41 (dd, J = 6.0, 1.2 Hz, 1H), 5.22 (d, J = 5.6 Hz, 1H), 3.05 - 2.95 (hept, J = 6.9 Hz, 1H), 2.48 (s, 3H), 1.32 (d, J = 6.9 Hz, 6H); <sup>13</sup>C NMR (126 MHz, CDCl<sub>3</sub>) δ = 157.5, 153.1, 145.2, 140.8, 138.9, 138.2, 137.0, 136.8 (d, J = 25.6 Hz), 134.7, 132.0, 130.9, 130.0, 128.0, 127.9, 127.7, 127.5, 127.4, 127.2, 126.4, 126.3, 126.3, 114.6, 109.7, 106.2, 56.9, 34.3, 23.9, 21.9; <sup>19</sup>F NMR (376 MHz, CDCl<sub>3</sub>) δ = 63.4; HRMS (ESI<sup>+</sup>): calculated for C<sub>37</sub>H<sub>34</sub>FN<sub>2</sub>O<sub>4</sub>S<sub>2</sub> [M+H<sup>+</sup>]: m/z = 653.1939, m/z found 653.1935; IR ν<sub>max</sub> (ATR)/cm<sup>-1</sup>: 2967, 1937, 1400, 1373, 1176, 1055, 1014.

**2-(Benzo[d][1,3]dioxol-5-yl)-3-((4-(tert-butyl)phenyl)sulfonyl)-7-(4-methoxyphenyl)-5-(4-propylphenyl)-3,10a-dihydropyrido[1,2-d][1,4]diazepine-1-sulfonyl fluoride (4kf)**

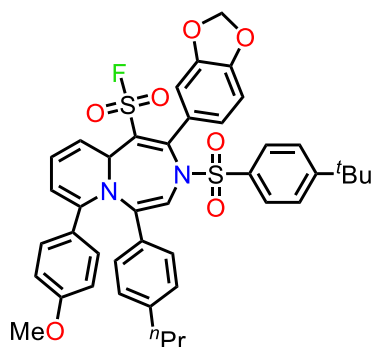

Following general procedure M (stirring for 20 h at room temperature), the title compound was isolated after purification by flash column chromatography (0-15% EtOAc in petroleum ether) as a purple solid (60.0 mg, 78%).

**m.p.** 128 - 130 °C;  $^1\text{H NMR}$  (500 MHz,  $\text{CDCl}_3$ )  $\delta$  7.57 (appt. d,  $J = 8.7$  Hz, 2H), 7.52 (appt. d,  $J = 8.8$  Hz, 2H), 7.11 (dd,  $J = 8.0, 1.8$  Hz, 1H), 6.97 (d,  $J = 1.7$  Hz, 1H), 6.85 (d,  $J = 8.0$  Hz, 1H), 6.84 – 6.77 (m, 4H), 6.71 (appt. d,  $J = 8.5$  Hz, 2H), 6.47 (appt. d,  $J = 8.8$  Hz, 2H), 6.17 (ddd,  $J = 9.4, 5.7, 1.6$  Hz, 1H), 6.07 (dd,  $J = 4.4, 1.5$  Hz, 2H), 5.98 (s, 1H), 5.24 (dd,  $J = 9.4, 5.9$  Hz, 1H), 5.10 (d,  $J = 5.6$  Hz, 1H), 4.93 (dd,  $J = 5.9, 1.5$  Hz, 1H), 3.66 (s, 3H), 2.45 (t,  $J = 7.4$  Hz, 2H), 1.59 – 1.49 (m, 2H), 1.40 (s, 9H), 0.87 (t,  $J = 7.3$  Hz, 3H);  $^{13}\text{C NMR}$  (126 MHz,  $\text{CDCl}_3$ )  $\delta$  158.8, 158.6, 156.9 (d,  $J = 5.3$  Hz), 151.1, 147.7, 142.2, 140.6, 137.7, 136.1 (d,  $J = 25.9$  Hz), 135.7, 133.8, 131.8, 128.8, 128.1, 127.9, 127.4, 127.2, 126.5, 126.3, 113.9, 113.3, 110.8, 108.8, 108.2, 105.0, 102.0, 56.7, 55.3, 37.6, 35.6, 31.3, 24.6, 13.7;  $^{19}\text{F NMR}$  (376 MHz,  $\text{CDCl}_3$ )  $\delta$  62.8; **HRMS** (ESI $^+$ ): calculated for  $\text{C}_{42}\text{H}_{42}\text{FN}_2\text{O}_7\text{S}_2$  [ $\text{M}+\text{H}^+$ ]:  $m/z = 769.2412$ ,  $m/z$  found 769.2404; **IR**  $\nu_{\text{max}}$  (ATR)/ $\text{cm}^{-1}$ : 2963, 2925, 2869, 1607, 1578, 1507, 1485, 1399, 1374, 1248, 1173, 1034, 781, 730.

**2-(4-(Cyclohexyloxy)-3-methoxyphenyl)-7-(4-methoxyphenyl)-3-(naphthalen-2-ylsulfonyl)-5-(4-propylphenyl)-3,10a-dihydropyrido[1,2-d][1,4]diazepine-1-sulfonyl fluoride (4kg)**

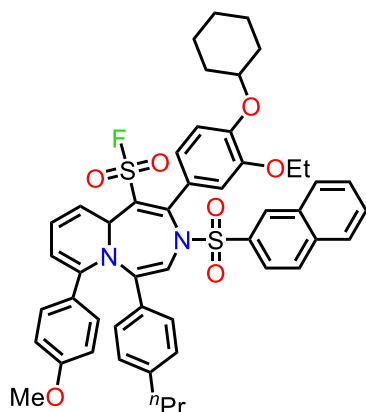

Following general procedure M (stirring for 40 h at room temperature), the title compound was isolated after purification by flash column chromatography (0-15% EtOAc in petroleum ether) as a purple solid (49.0 mg, 58%).

**m.p.** 112 - 113 °C;  $^1\text{H NMR}$  (500 MHz,  $\text{CDCl}_3$ )  $\delta$  7.96 – 7.90 (m, 3H), 7.85 – 7.82 (m, 1H), 7.73 – 7.69 (m, 1H), 7.66 – 7.62 (m, 1H), 7.54 (dd,  $J = 8.7, 1.9$  Hz, 1H), 7.01 – 6.97 (m, 2H), 6.84 – 6.78 (m, 4H), 6.74 – 6.69 (m, 2H), 6.66 (d,  $J = 8.4$  Hz, 1H), 6.48 – 6.42 (m, 2H), 6.16 (ddd,  $J = 9.4, 5.7, 1.6$  Hz, 1H), 6.01 (s, 1H), 5.53 (dd,  $J = 5.8, 1.3$  Hz, 1H), 5.35 (dd,  $J = 9.4, 5.9$  Hz, 1H), 5.12 (d,  $J = 5.6$  Hz, 1H), 4.18 – 4.07 (m, 1H), 3.80 (s, 3H), 3.65 (s, 3H), 2.46 (t,  $J = 7.4$  Hz, 2H), 2.08 – 2.03 (m, 1H), 1.99 – 1.94 (m, 1H), 1.88 – 1.82 (m, 2H), 1.65 – 1.52 (m, 6H), 1.40 – 1.29 (m, 4H), 0.87 (t,  $J = 7.3$  Hz, 3H);  $^{13}\text{C NMR}$  (126 MHz,  $\text{CDCl}_3$ )  $\delta$  158.7, 157.4 (d,  $J = 4.5$  Hz), 151.1, 149.5, 142.2, 140.7, 137.3, 135.7, 135.4 – 135.2 (m), 135.1, 134.9, 132.0, 131.9, 129.7, 129.6, 129.5, 129.5, 128.1, 128.1, 127.5, 127.3, 126.5, 125.9, 124.9, 122.0, 115.0, 114.3, 113.3, 113.0, 109.1, 105.4, 57.2, 56.3, 55.3, 37.6, 32.1, 32.0, 25.6, 24.6, 24.3, 24.3, 13.7;  $^{19}\text{F NMR}$  (376 MHz,  $\text{CDCl}_3$ )  $\delta$  63.4; **HRMS** (ESI $^+$ ): calculated for  $\text{C}_{48}\text{H}_{48}\text{FN}_2\text{O}_7\text{S}_2$  [ $\text{M}+\text{H}^+$ ]:  $m/z = 847.2881$ ,  $m/z$  found 847.2890; **IR**  $\nu_{\text{max}}$  (ATR)/ $\text{cm}^{-1}$ : 3056, 2933, 2854, 1602, 1505, 1400, 1270, 1247, 1169, 1143, 809, 748.

**3-((4-(*tert*-Butyl)phenyl)sulfonyl)-7-(4-methoxyphenyl)-2-(4'-propyl-[1,1'-biphenyl]-4-yl)-5-(4-propylphenyl)-3,10a-dihydropyrido[1,2-*d*][1,4]diazepine-1-sulfonyl fluoride (4kh)**

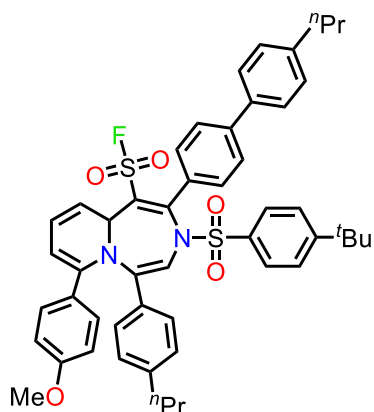

Following general procedure M (stirring for 16 h at room temperature), the title compound was isolated after purification by flash column chromatography (0-10% EtOAc in petroleum ether) as a purple solid (64.0 mg, 76%). **m.p.** 112 - 114 °C; **<sup>1</sup>H NMR** (500 MHz, CDCl<sub>3</sub>) δ 7.61 – 7.54 (m, 6H), 7.49 – 7.42 (m, 4H), 7.30 (appt. d, *J* = 8.1 Hz, 2H), 6.86 – 6.82 (m, 4H), 6.75 (appt. d, *J* = 8.4 Hz, 2H), 6.49 (appt. d, *J* = 8.7 Hz, 2H), 6.24 (ddd, *J* = 9.3, 5.7, 1.3 Hz, 1H), 6.03 (s, 1H), 5.38 (dd, *J* = 9.3, 6.0 Hz, 1H), 5.31 (dd, *J* = 5.9, 1.0 Hz, 1H), 5.16 (d, *J* = 5.6 Hz, 1H), 3.67 (s, 3H), 2.67 (t, *J* = 7.6 Hz, 2H), 2.47 (t, *J* = 7.4 Hz, 2H), 1.76 – 1.68 (m, 2H), 1.60 – 1.52 (m, 2H), 1.32 (s, 9H), 1.00 (t, *J* = 7.3 Hz, 3H), 0.88 (t, *J* = 7.3 Hz, 3H); **<sup>13</sup>C NMR** (126 MHz, CDCl<sub>3</sub>) δ 158.8, 158.3, 157.1 (d, *J* = 5.4 Hz), 144.4, 142.9, 142.2, 140.7, 137.4, 137.2, 137.0 (d, *J* = 25.6 Hz), 135.7, 134.5, 133.1, 131.8, 131.4, 129.2, 128.1, 127.5, 127.2, 126.5, 126.4, 126.4, 113.9, 113.4, 109.3, 105.2, 56.9, 55.3, 37.8, 37.6, 35.4, 31.2, 24.6, 24.6, 13.9, 13.7; **<sup>19</sup>F NMR** (376 MHz, CDCl<sub>3</sub>) δ 63.4; **HRMS** (ESI<sup>+</sup>): calculated for C<sub>50</sub>H<sub>52</sub>FN<sub>2</sub>O<sub>5</sub>S<sub>2</sub> [M+H<sup>+</sup>]: *m/z* = 843.3296, *m/z* found 843.3299; **IR** *v*<sub>max</sub> (ATR)/cm<sup>-1</sup>: 3063, 2888, 2815, 1637m 1580m 1508, 1401, 1247, 1198, 1084, 1039, 983.

**7-(4-Formylphenyl)-2,5-diphenyl-3-tosyl-3,10a-dihydropyrido[1,2-*d*][1,4]diazepine-1-sulfonyl fluoride (4ki)**

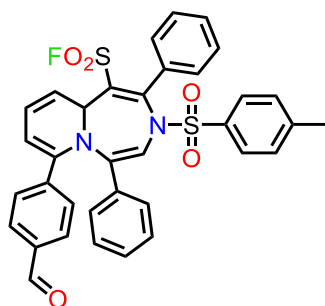

Following general procedure M (50.0 μmol of the required SASF used, stirring for 20 h at room temperature), the title compound was isolated after purification by flash column chromatography (0-20% EtOAc in petroleum ether) as an orange solid (20.0 mg, 63%). **m.p.** 153 - 154 °C; **<sup>1</sup>H NMR** (500 MHz, CDCl<sub>3</sub>) δ 9.81 (s, 1H), 7.58 – 7.51 (m, 3H), 7.49 – 7.41 (m, 4H), 7.36 (appt. d, *J* = 8.4 Hz, 1H), 7.30 (appt. d, *J* = 8.0 Hz, 1H), 7.07 – 6.96 (m, 5H), 6.93 – 6.88 (m, 2H), 6.29 (ddd, *J* = 9.5, 5.7, 1.7 Hz, 1H), 6.01 (s, 1H), 5.52 (dd, *J* = 9.1, 5.9 Hz, 1H), 5.40 (dd, *J* = 5.9, 1.5

Hz, 1H), 5.31 (d,  $J = 5.7$  Hz, 1H), 2.49 (s, 3H);  $^{13}\text{C NMR}$  (126 MHz,  $\text{CDCl}_3$ )  $\delta$  191.6, 157.7, 145.5, 144.8, 139.5, 137.6, 137.2 (d,  $J = 25.2$  Hz), 136.6, 134.9, 134.4, 134.3, 131.9, 130.9, 130.2, 129.5, 128.3, 128.3, 128.2, 127.6, 127.6, 126.6, 126.2, 115.9, 110.0, 107.8, 56.7, 21.9;  $^{19}\text{F NMR}$  (376 MHz,  $\text{CDCl}_3$ )  $\delta$  63.9; **HRMS** (ESI<sup>+</sup>): calculated for  $\text{C}_{35}\text{H}_{28}\text{FN}_2\text{O}_5\text{S}_2$  [ $\text{M}+\text{H}^+$ ]:  $m/z = 639.1418$ ,  $m/z$  found 639.1412; **IR**  $\nu_{\text{max}}$  (ATR)/ $\text{cm}^{-1}$ : 3052, 2926, 2865, 1696, 1602, 1404, 1356, 1198, 1160, 794, 747.

**3-((4-(*tert*-butyl)Phenyl)sulfonyl)-5-(3,4-diethoxyphenyl)-7-phenyl-2-(4-(trifluoromethyl)phenyl)-3,10a-dihydropyrido[1,2-*d*][1,4]diazepine-1-sulfonyl fluoride (4kj)**

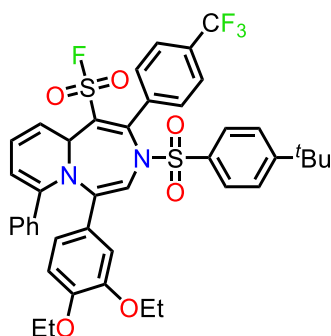

Following general procedure M, the title compound was isolated after purification by flash column chromatography (0-15% EtOAc in petroleum ether) as a purple solid (37.0 mg, 46%). **m.p.** 146 - 148 °C;  $^1\text{H NMR}$  (500 MHz,  $\text{CDCl}_3$ )  $\delta$  7.61 (s, 4H), 7.49 (appt. d,  $J = 8.7$  Hz, 2H), 7.38 (appt. d,  $J = 8.7$  Hz, 2H), 7.01 – 6.96 (m, 3H), 6.85 – 6.80 (m, 2H), 6.53 (d,  $J = 8.3$  Hz, 1H), 6.46 – 6.37 (m, 2H), 6.27 (ddd,  $J = 9.0, 5.7, 1.0$  Hz, 1H), 5.99 (s, 1H), 5.45 – 5.36 (m, 2H), 5.24 (d,  $J = 5.6$  Hz, 1H), 4.03 – 3.88 (m, 4H), 1.43 – 1.38 (m, 6H), 1.38 (s, 9H);  $^{13}\text{C NMR}$  (126 MHz,  $\text{CDCl}_3$ )  $\delta$  158.7, 155.4 (d,  $J = 5.3$  Hz), 148.7, 148.4, 141.0, 139.1 (d,  $J = 26.0$  Hz), 138.8, 137.9, 136.9, 134.4, 133.0 (q,  $J = 32.7$  Hz), 131.2, 130.8, 127.9, 127.3, 127.0, 126.7, 126.6, 126.1, 125.0 (q,  $J = 3.5$  Hz), 124.9 – 122.6 (m), 120.5, 114.1, 113.4, 113.3, 109.0, 106.3, 64.9, 64.8, 56.8, 35.5, 31.2, 15.0, 14.8;  $^{19}\text{F NMR}$  (376 MHz,  $\text{CDCl}_3$ )  $\delta$  64.0, -62.8; **HRMS** (ESI<sup>+</sup>): calculated for  $\text{C}_{42}\text{H}_{41}\text{F}_4\text{N}_2\text{O}_6\text{S}_2$  [ $\text{M}+\text{H}^+$ ]:  $m/z = 809.2337$ ,  $m/z$  found 809.2338; **IR**  $\nu_{\text{max}}$  (ATR)/ $\text{cm}^{-1}$ : 3098, 2975, 2870, 1567, 1512, 1396, 1321, 1172, 1129, 1066, 844.

## Synthesis and experimental data for compounds 41a-41q

### General Procedure N

To a solution of the required diene **3I** (100  $\mu$ mol) in  $\text{CH}_2\text{Cl}_2$  (500  $\mu\text{L}$ ) was added the required SASF **2** (100  $\mu$ mol) and stirred at room temperature for 2-16 h. The solvent was then removed under reduced pressure and the crude product was then purified by flash column chromatography to obtain the analytically pure product.

### General Procedure O

To a solution of required diene **3I** (100  $\mu$ mol) in DCE (500  $\mu\text{L}$ ) was added the required SASF **2** (100  $\mu$ mol) and refluxed for 16 h. The solvent was then removed under reduced pressure and the crude product was then purified by flash column chromatography to obtain the analytically pure product.

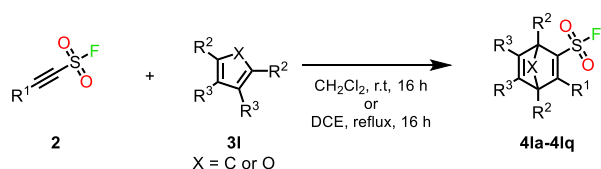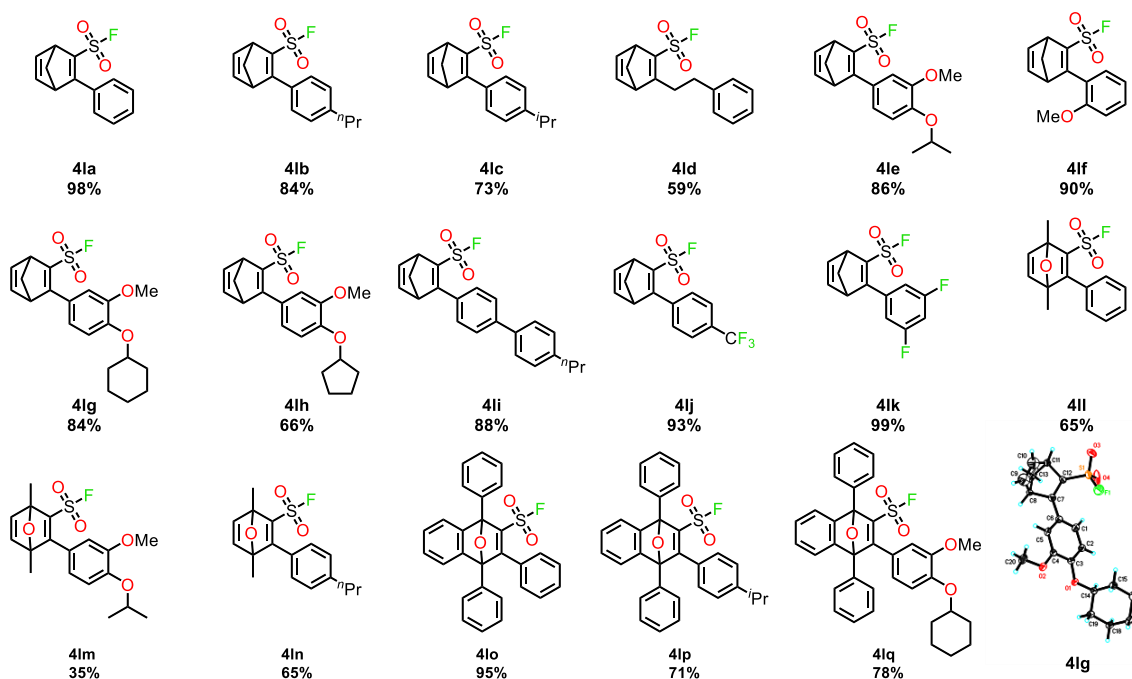

### 3-Phenylbicyclo[2.2.1]hepta-2,5-diene-2-sulfonyl fluoride (4la)

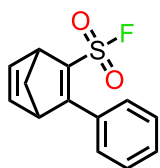

Following general procedure N (500  $\mu\text{mol}$  of the required diene used), the title compound was isolated after purification by flash column chromatography (0-15% EtOAc in petroleum ether) as a colourless solid (24.0 mg, 98%). **m.p.** 48 - 49  $^{\circ}\text{C}$ ;  $^1\text{H NMR}$  (400 MHz,  $\text{CDCl}_3$ )  $\delta$  7.51 – 7.37 (m, 5H), 7.13 (dd,  $J = 4.9, 3.1$  Hz, 1H), 7.00 (dd,  $J = 4.7, 3.5$  Hz, 1H), 4.28 – 4.13 (m, 1H), 4.11 – 3.99 (m, 1H), 2.49 (appt. dt,  $J = 7.1, 1.5$  Hz, 1H), 2.30 – 2.15 (m, 1H);  $^{13}\text{C NMR}$  (101 MHz,  $\text{CDCl}_3$ )  $\delta$  172.1 (d,  $J = 5.1$  Hz), 143.4, 140.6, 138.2 (d,  $J = 27.9$  Hz), 132.3, 130.6, 128.4, 128.0 (d,  $J = 1.1$  Hz), 71.2, 59.7 (d,  $J = 1.4$  Hz), 54.4;  $^{19}\text{F NMR}$  (376 MHz,  $\text{CDCl}_3$ )  $\delta$  61.4; **HRMS** (ESI $^+$ ): calculated for  $\text{C}_{13}\text{H}_{11}\text{FO}_2\text{SNa}$  [ $\text{M}+\text{Na}^+$ ]:  $m/z = 273.0356$ ,  $m/z$  found 273.0356; **IR**  $\nu_{\text{max}}$  (ATR)/ $\text{cm}^{-1}$ : 3069, 2959, 2881, 1578, 1395, 739.

### 3-(4-Propylphenyl)bicyclo[2.2.1]hepta-2,5-diene-2-sulfonyl fluoride (4lb)

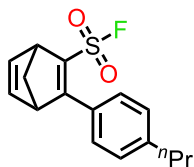

Following general procedure N, the title compound was isolated after purification by flash column chromatography (0-20% EtOAc in petroleum ether) as a colourless solid (29.0 mg, 86%). **m.p.** 48 - 50  $^{\circ}\text{C}$ ;  $^1\text{H NMR}$  (400 MHz,  $\text{CDCl}_3$ )  $\delta$  7.42 (appt. d,  $J = 8.3$  Hz, 2H), 7.25 (appt. d,  $J = 8.4$  Hz, 2H), 7.11 (dd,  $J = 4.9, 3.0$  Hz, 1H), 6.98 (dd,  $J = 4.7, 3.4$  Hz, 1H), 4.21 – 4.16 (m, 1H), 4.08 – 4.02 (m, 1H), 2.69 – 2.59 (m, 2H), 2.50 – 2.42 (m, 1H), 2.26 – 2.15 (m, 1H), 1.75 – 1.60 (m, 2H), 0.97 (t,  $J = 7.3$  Hz, 3H);  $^{13}\text{C NMR}$  (101 MHz,  $\text{CDCl}_3$ )  $\delta$  171.0 (d,  $J = 5.1$  Hz), 144.7, 142.1, 139.3 (d,  $J = 1.0$  Hz), 135.7 (d,  $J = 27.5$  Hz), 127.3, 127.1 (d,  $J = 1.2$  Hz), 69.7 (d,  $J = 0.9$  Hz), 58.5 (d,  $J = 1.4$  Hz), 53.3, 36.9, 23.2, 12.8;  $^{19}\text{F NMR}$  (376 MHz,  $\text{CDCl}_3$ )  $\delta$  61.7; **HRMS** (ESI $^+$ ): calculated for  $\text{C}_{16}\text{H}_{17}\text{FO}_2\text{SNa}$  [ $\text{M}+\text{Na}^+$ ]:  $m/z = 315.0826$ ,  $m/z$  found 315.0826; **IR**  $\nu_{\text{max}}$  (ATR)/ $\text{cm}^{-1}$ : 3077, 2960, 2873, 2188, 1398, 1209, 1183, 745.

### 3-(4-Isopropylphenyl)bicyclo[2.2.1]hepta-2,5-diene-2-sulfonyl fluoride (4lc)

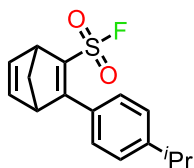

Following general procedure N, the title compound was isolated after purification by flash column chromatography (0-10% EtOAc in petroleum ether) as a yellow oil (21.0 mg, 73%);  $^1\text{H NMR}$  (400 MHz,  $\text{CDCl}_3$ )  $\delta$  7.44 (appt. d,  $J = 8.3$  Hz, 2H), 7.30 (appt. d,  $J = 8.4$  Hz, 2H), 7.11 (dd,  $J = 4.9, 3.0$  Hz, 1H), 6.98 (dd,  $J = 4.7, 3.3$  Hz,

1H), 4.21 – 4.14 (m, 1H), 4.09 – 4.02 (m, 1H), 2.95 (hept,  $J = 7.0$  Hz, 1H), 2.53 – 2.38 (m, 1H), 2.24 – 2.14 (m, 1H), 1.28 (d,  $J = 6.9$  Hz, 6H);  $^{13}\text{C NMR}$  (101 MHz,  $\text{CDCl}_3$ )  $\delta$  172.1 (d,  $J = 5.0$  Hz), 152.0, 143.3, 140.5, 136.9 (d,  $J = 27.5$  Hz), 129.7, 128.4 (d,  $J = 0.9$  Hz), 126.5, 70.9, 59.6 (d,  $J = 1.2$  Hz), 54.4, 34.2, 23.8 (d,  $J = 2.6$  Hz);  $^{19}\text{F NMR}$  (376 MHz,  $\text{CDCl}_3$ )  $\delta$  61.6; **HRMS** (ESI<sup>+</sup>): calculated for  $\text{C}_{16}\text{H}_{17}\text{FO}_2\text{SNa}$  [ $\text{M}+\text{Na}^+$ ]:  $m/z = 315.0826$ ,  $m/z$  found 315.0829; **IR**  $\nu_{\text{max}}$  (ATR)/ $\text{cm}^{-1}$ : 3075, 2962, 2873, 1398, 1208, 757.

### 3-Phenethylbicyclo[2.2.1]hepta-2,5-diene-2-sulfonyl fluoride (4ld)

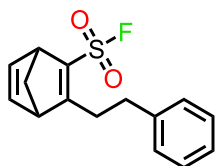

Following general procedure N, the title compound was isolated after purification by flash column chromatography (0-15% EtOAc in petroleum ether) as a yellow oil (16.0 mg, 59%);  $^1\text{H NMR}$  (400 MHz,  $\text{CDCl}_3$ )  $\delta$  7.39 – 7.17 (m, 5H), 6.97 (dd,  $J = 4.9, 3.0$  Hz, 1H), 6.70 – 6.62 (m, 1H), 4.00 – 3.90 (m, 1H), 3.72 – 3.62 (m, 1H), 3.14 – 2.93 (m, 2H), 2.91 – 2.71 (m, 2H), 2.20 – 2.12 (m, 1H), 2.11 – 1.99 (m, 1H);  $^{13}\text{C NMR}$  (101 MHz,  $\text{CDCl}_3$ )  $\delta$  177.5 (d,  $J = 5.7$  Hz), 143.2, 140.5 (d,  $J = 1.4$  Hz), 139.9, 139.1 (d,  $J = 27.6$  Hz), 128.6, 128.5, 126.6, 71.7 (d,  $J = 1.0$  Hz), 57.2 (d,  $J = 1.4$  Hz), 52.6, 33.1 (d,  $J = 1.3$  Hz), 31.3;  $^{19}\text{F NMR}$  (376 MHz,  $\text{CDCl}_3$ )  $\delta$  60.7; **HRMS** (ESI<sup>+</sup>): calculated for  $\text{C}_{15}\text{H}_{15}\text{FO}_2\text{SNa}$  [ $\text{M}+\text{Na}^+$ ]:  $m/z = 301.0669$ ,  $m/z$  found 301.0674; **IR**  $\nu_{\text{max}}$  (ATR)/ $\text{cm}^{-1}$ : 3065, 3028, 2968, 2930, 2873, 2213, 1612, 1395, 1208, 748.

### 3-(4-Isopropoxy-3-methoxyphenyl)bicyclo[2.2.1]hepta-2,5-diene-2-sulfonyl fluoride (4le)

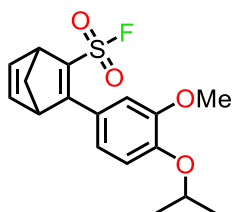

Following general procedure N, the title compound was isolated after purification by flash column chromatography (0-20% EtOAc in petroleum ether) as a colourless solid (29.0 mg, 86%). **m.p.** 48 - 50 °C;  $^1\text{H NMR}$  (400 MHz,  $\text{CDCl}_3$ )  $\delta$  7.18 (d,  $J = 2.1$  Hz, 1H), 7.12 – 7.06 (m, 2H), 6.95 (dd,  $J = 4.5, 3.5$  Hz, 1H), 6.91 (d,  $J = 8.5$  Hz, 1H), 4.63 (hept,  $J = 6.1$  Hz, 1H), 4.20 – 4.13 (m, 1H), 4.12 – 4.04 (m, 1H), 3.89 (s, 3H), 2.44 – 2.38 (m, 1H), 2.21 – 2.13 (m, 1H), 1.41 (d,  $J = 6.0$  Hz, 3H), 1.14 (d,  $J = 6.1$  Hz, 6H);  $^{13}\text{C NMR}$  (101 MHz,  $\text{CDCl}_3$ )  $\delta$  171.6 (d,  $J = 4.8$  Hz), 149.8 (d,  $J = 34.0$  Hz), 143.3, 140.1, 135.0 (d,  $J = 26.6$  Hz), 128.4, 124.6, 121.8, 115.7, 113.8, 112.9 (d,  $J = 1.3$  Hz), 71.4, 70.3 (d,  $J = 1.1$  Hz), 59.34 (d,  $J = 1.3$  Hz), 56.2, 54.6, 22.1 (d,  $J = 1.7$  Hz);  $^{19}\text{F NMR}$  (376 MHz,  $\text{CDCl}_3$ )  $\delta$  62.1; **HRMS** (ESI<sup>+</sup>): calculated for  $\text{C}_{17}\text{H}_{19}\text{FO}_4\text{SNa}$  [ $\text{M}+\text{Na}^+$ ]:  $m/z = 361.0880$ ,  $m/z$  found 361.0882; **IR**  $\nu_{\text{max}}$  (ATR)/ $\text{cm}^{-1}$ : 3074, 2978, 2939, 2172, 1597, 1504, 744.



### 3-(2-Methoxyphenyl)bicyclo[2.2.1]hepta-2,5-diene-2-sulfonyl fluoride (4f)

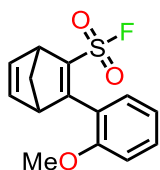

Following general procedure N, the title compound was isolated after purification by flash column chromatography (0-10% EtOAc in petroleum ether) as a yellow oil (25.0 mg, 90%);  $^1\text{H NMR}$  (400 MHz,  $\text{CDCl}_3$ )  $\delta$  7.42 – 7.35 (m, 1H), 7.20 (dd,  $J$  = 7.6, 1.7 Hz, 1H), 7.08 (dd,  $J$  = 4.9, 3.0 Hz, 1H), 6.99 (td,  $J$  = 7.5, 0.9 Hz, 1H), 6.96 – 6.90 (m, 2H), 4.13 (d,  $J$  = 2.1 Hz, 1H), 4.01 (s, 1H), 3.85 (s, 3H), 2.52 – 2.46 (m, 1H), 2.20 (d,  $J$  = 6.9 Hz, 1H);  $^{13}\text{C NMR}$  (101 MHz,  $\text{CDCl}_3$ )  $\delta$  170.7 (d,  $J$  = 5.4 Hz), 156.9, 142.5, 141.7, 139.7 (d,  $J$  = 28.6 Hz), 131.6, 129.5, 122.1, 120.3, 111.0, 71.2, 59.5 (d,  $J$  = 1.2 Hz), 55.5, 53.3;  $^{19}\text{F NMR}$  (376 MHz,  $\text{CDCl}_3$ )  $\delta$  59.5; **HRMS** ( $\text{ESI}^+$ ): calculated for  $\text{C}_{14}\text{H}_{13}\text{FO}_3\text{SNa}$  [ $\text{M}+\text{Na}^+$ ]:  $m/z$  = 303.0462,  $m/z$  found 303.0460; **IR**  $\nu_{\text{max}}$  (ATR)/ $\text{cm}^{-1}$ : 3074, 3002, 2943, 2842, 1592, 1395, 1207, 1188, 743.

### 3-(4-(Cyclohexyloxy)-3-methoxyphenyl)bicyclo[2.2.1]hepta-2,5-diene-2-sulfonyl fluoride (4g)

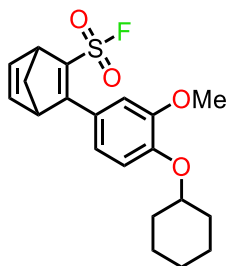

Following general procedure N, the title compound was isolated after purification by flash column chromatography (0-20% EtOAc in petroleum ether) as a colourless solid (32.0 mg, 84%). **m.p.** 99 - 100 °C;  $^1\text{H NMR}$  (400 MHz,  $\text{CDCl}_3$ )  $\delta$  7.18 (d,  $J$  = 2.1 Hz, 1H), 7.11 – 7.05 (m, 2H), 6.97 – 6.89 (m, 2H), 4.35 – 4.25 (m, 1H), 4.20 – 4.15 (m, 1H), 4.11 – 4.05 (m, 1H), 3.89 (s, 3H), 2.46 – 2.38 (m, 1H), 2.21 – 2.15 (m, 1H), 2.10 – 1.99 (m, 2H), 1.90 – 1.78 (m, 2H), 1.67 – 1.53 (m, 3H), 1.44 – 1.21 (m, 3H);  $^{13}\text{C NMR}$  (101 MHz,  $\text{CDCl}_3$ )  $\delta$  171.6 (d,  $J$  = 4.8 Hz), 149.9, 149.8, 143.3, 140.1, 134.9 (d,  $J$  = 26.6 Hz), 124.6, 121.8, 114.2, 113.0, 77.1, 70.3, 59.3, 56.3, 54.6, 31.9 (d,  $J$  = 1.5 Hz), 25.6, 24.1;  $^{19}\text{F NMR}$  (376 MHz,  $\text{CDCl}_3$ )  $\delta$  62.2; **HRMS** ( $\text{ESI}^+$ ): calculated for  $\text{C}_{20}\text{H}_{23}\text{FO}_4\text{SNa}$  [ $\text{M}+\text{Na}^+$ ]:  $m/z$  = 401.1193,  $m/z$  found 401.1188; **IR**  $\nu_{\text{max}}$  (ATR)/ $\text{cm}^{-1}$ : 3003, 2933, 2859, 1595, 1508, 1396, 723.

### 3-(4-(Cyclopentyloxy)-3-methoxyphenyl)bicyclo[2.2.1]hepta-2,5-diene-2-sulfonyl fluoride (4lh)

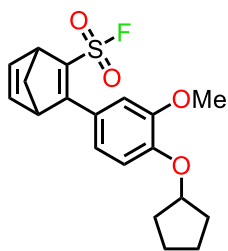

Following general procedure N, the title compound was isolated after purification by flash column chromatography (0-20% EtOAc in petroleum ether) as a colourless solid (24.0 mg, 66%). **m.p.** 62 - 63 °C; **<sup>1</sup>H NMR** (400 MHz, CDCl<sub>3</sub>) δ 7.17 (d, *J* = 2.1 Hz, 1H), 7.12 – 7.06 (m, 2H), 6.94 (dd, *J* = 4.6, 3.5 Hz, 1H), 6.90 (d, *J* = 8.5 Hz, 1H), 4.83 (tt, *J* = 6.3, 3.2 Hz, 1H), 4.21 – 4.14 (m, 1H), 4.12 – 4.04 (m, 1H), 3.88 (s, 3H), 2.46 – 2.38 (m, 1H), 2.21 – 2.15 (m, 1H), 2.05 – 1.78 (m, 6H), 1.71 – 1.58 (m, 2H); **<sup>13</sup>C NMR** (101 MHz, CDCl<sub>3</sub>) δ 171.6 (d, *J* = 4.8 Hz), 150.4, 149.4, 143.3, 140.1, 134.8 (d, *J* = 26.5 Hz), 124.3, 121.8, 113.4, 112.9, 80.6, 70.3, 59.3 (d, *J* = 1.3 Hz), 56.3, 54.6, 33.0 (d, *J* = 3.0 Hz), 24.2; **<sup>19</sup>F NMR** (376 MHz, CDCl<sub>3</sub>) δ 62.2; **HRMS** (ESI<sup>+</sup>): calculated for C<sub>19</sub>H<sub>21</sub>FO<sub>4</sub>SNa [M+Na<sup>+</sup>]: *m/z* = 387.1037, *m/z* found 387.1030; **IR** *v*<sub>max</sub> (ATR)/cm<sup>-1</sup>: 2958, 2875, 2361, 1598, 1394, 728.

### 3-(4'-Propyl-[1,1'-biphenyl]-4-yl)bicyclo[2.2.1]hepta-2,5-diene-2-sulfonyl fluoride (4li)

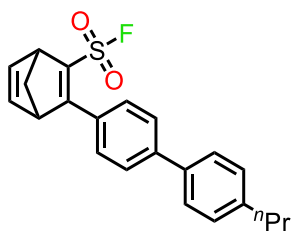

Following general procedure N, the title compound was isolated after purification by flash column chromatography (0-10% EtOAc in petroleum ether) as a colourless solid (32.0 mg, 88%). **m.p.** 80 - 82 °C; **<sup>1</sup>H NMR** (400 MHz, CDCl<sub>3</sub>) δ 7.69 – 7.63 (m, 2H), 7.60 – 7.51 (m, 4H), 7.31 – 7.25 (m, 2H), 7.14 (dd, *J* = 4.9, 3.0 Hz, 1H), 7.01 (dd, *J* = 4.8, 3.3 Hz, 1H), 4.25 – 4.17 (m, 1H), 4.15 – 4.04 (m, 1H), 2.71 – 2.59 (m, 2H), 2.54 – 2.43 (m, 1H), 2.29 – 2.18 (m, 1H), 1.78 – 1.62 (m, 2H), 1.00 (t, *J* = 7.3 Hz, 3H); **<sup>13</sup>C NMR** (101 MHz, CDCl<sub>3</sub>) δ 171.7 (d, *J* = 5.0 Hz), 143.4, 143.3, 142.8, 140.5, 137.6 (d, *J* = 27.7 Hz), 137.4, 130.7, 129.2, 128.8 (d, *J* = 1.0 Hz), 127.0, 126.8, 71.0, 59.6 (d, *J* = 1.2 Hz), 54.5, 37.8, 24.6, 14.0; **<sup>19</sup>F NMR** (376 MHz, CDCl<sub>3</sub>) δ 61.6; **HRMS** (ESI<sup>+</sup>): calculated for C<sub>22</sub>H<sub>21</sub>FO<sub>2</sub>SNa [M+Na<sup>+</sup>]: *m/z* = 391.1138, *m/z* found 391.1139; **IR** *v*<sub>max</sub> (ATR)/cm<sup>-1</sup>: 2955, 2867, 1581, 1390, 1180, 1055, 746.

### 3-(4-(Trifluoromethyl)phenyl)bicyclo[2.2.1]hepta-2,5-diene-2-sulfonyl fluoride (4lj)

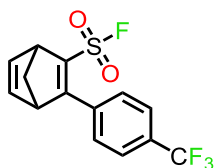

Following general procedure N, the title compound was isolated after purification by flash column chromatography (0-10% EtOAc in petroleum ether) as a colourless solid (30.0 mg, 93%). **m.p.** 55 - 56 °C; **<sup>1</sup>H NMR** (400 MHz, CDCl<sub>3</sub>) δ 7.69 (appt. d, *J* = 8.3 Hz, 2H), 7.54 (appt. d, *J* = 8.3 Hz, 2H), 7.16 (dd, *J* = 4.8, 3.2 Hz, 1H), 7.03 (dd, *J* = 4.6, 3.4 Hz, 1H), 4.29 – 4.08 (m, 1H), 4.08 – 3.94 (m, 1H), 2.59 – 2.43 (m, 1H), 2.30 – 2.10 (m, 1H); **<sup>13</sup>C NMR** (101 MHz, CDCl<sub>3</sub>) δ 170.2 (d, *J* = 5.3 Hz), 143.5, 140.9 (d, *J* = 28.7 Hz), 140.6, 135.8, 132.1 (q, *J* = 32.9 Hz), 128.2 (d, *J* = 1.0 Hz), 123.8 (q, *J* = 272.4 Hz), 125.4 (q, *J* = 3.8 Hz), 71.8, 59.8, 54.5; **<sup>19</sup>F NMR** (376 MHz, CDCl<sub>3</sub>) δ 61.1, -63.0; **HRMS** (ASAP): calculated for C<sub>14</sub>H<sub>11</sub>F<sub>4</sub>O<sub>2</sub>S [M+H]: *m/z* = 319.0416, *m/z* found 319.0412; **IR** *v*<sub>max</sub> (ATR)/cm<sup>-1</sup>: 2967, 2642, 2579, 1603, 1393, 1322, 1130, 764.

### 3-(3,5-Difluorophenyl)bicyclo[2.2.1]hepta-2,5-diene-2-sulfonyl fluoride (4lk)

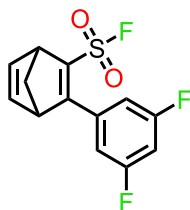

Following general procedure N, the title compound was isolated after purification by flash column chromatography (0-15% EtOAc in petroleum ether) as a colourless solid (28.0 mg, 99%). **m.p.** 56 - 58 °C; **<sup>1</sup>H NMR** (400 MHz, CDCl<sub>3</sub>) δ 7.15 (dd, *J* = 4.7, 3.3 Hz, 1H), 7.05 – 7.00 (m, 1H), 7.00 – 6.92 (m, 2H), 6.92 – 6.82 (m, 1H), 4.27 – 4.15 (m, 1H), 4.04 – 3.90 (m, 1H), 2.56 – 2.42 (m, 1H), 2.33 – 2.20 (m, 1H); **<sup>13</sup>C NMR** (101 MHz, CDCl<sub>3</sub>) δ 169.1 (d, *J* = 5.1 Hz), 162.7 (dd, *J* = 250.1, 12.8 Hz), 143.5, 141.2 (d, *J* = 28.6 Hz), 140.6 (d, *J* = 1.1 Hz), 135.2 (t, *J* = 10.0 Hz), 111.1 (dd, *J* = 26.8, 1.2 Hz), 111.1 (dd, *J* = 11.5, 1.1 Hz), 105.7 (t, *J* = 25.2 Hz), 71.7, 59.7 (d, *J* = 1.4 Hz), 54.6; **<sup>19</sup>F NMR** (376 MHz, CDCl<sub>3</sub>) δ 61.4, -108.6 (t, *J* = 7.6 Hz); **HRMS** (ASAP): calculated for C<sub>13</sub>H<sub>10</sub>F<sub>3</sub>O<sub>2</sub>S [M+H]: *m/z* = 287.0354, *m/z* found 287.0350; **IR** *v*<sub>max</sub> (ATR)/cm<sup>-1</sup>: 3094, 2987, 2947, 2878, 1593, 1397, 1204, 737.

### 1,4-Dimethyl-3-phenyl-7-oxabicyclo[2.2.1]hepta-2,5-diene-2-sulfonyl fluoride (4II)

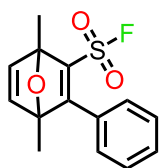

Following general procedure O, the title compound was isolated after purification by flash column chromatography (0-15% EtOAc in petroleum ether) as a yellow oil (26.0 mg, 95%);  $^1\text{H NMR}$  (400 MHz,  $\text{CDCl}_3$ )  $\delta$  7.50 – 7.42 (m, 3H), 7.21 – 7.13 (m, 3H), 7.03 (d,  $J$  = 5.1 Hz, 1H), 1.98 (s, 3H), 1.64 (s, 3H);  $^{13}\text{C NMR}$  (101 MHz,  $\text{CDCl}_3$ )  $\delta$  175.7 (d,  $J$  = 4.8 Hz), 148.9, 145.3, 143.8 (d,  $J$  = 31.3 Hz), 130.3, 130.0, 128.5, 126.6, 95.1, 92.5, 15.9, 15.7;  $^{19}\text{F NMR}$  (376 MHz,  $\text{CDCl}_3$ )  $\delta$  65.8; **HRMS** (ESI<sup>+</sup>): calculated for  $\text{C}_{14}\text{H}_{13}\text{FO}_3\text{SNa}$  [ $\text{M}+\text{Na}^+$ ]:  $m/z$  = 303.0461,  $m/z$  found 303.0463; **IR**  $\nu_{\text{max}}$  (ATR)/ $\text{cm}^{-1}$ : 2987, 2939, 1619, 1403, 1196, 747.

### 3-(4-Isopropoxy-3-methoxyphenyl)-1,4-dimethyl-7-oxabicyclo[2.2.1]hepta-2,5-diene-2-sulfonyl fluoride (4Im)

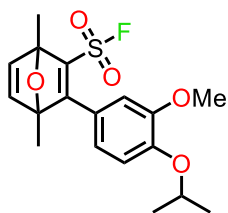

Following general procedure O, the title compound was isolated after purification by flash column chromatography (0-20% EtOAc in petroleum ether) as a yellow oil (13.0 mg, 35%);  $^1\text{H NMR}$  (400 MHz,  $\text{CDCl}_3$ )  $\delta$  7.15 (d,  $J$  = 5.1 Hz, 1H), 7.00 (d,  $J$  = 5.1 Hz, 1H), 6.92 (d,  $J$  = 8.3 Hz, 1H), 6.78 – 6.69 (m, 2H), 4.68 – 4.54 (m, 1H), 3.87 (s, 3H), 1.97 (s, 3H), 1.69 (s, 3H), 1.41 (dd,  $J$  = 6.0, 2.0 Hz, 6H);  $^{13}\text{C NMR}$  (101 MHz,  $\text{CDCl}_3$ )  $\delta$  175.7 (d,  $J$  = 4.7 Hz), 149.7 (d,  $J$  = 3.6 Hz), 148.6, 144.9, 141.3 (d,  $J$  = 30.5 Hz), 121.9, 120.0, 113.8, 111.9, 95.0, 92.3, 71.4, 56.3, 22.1 (d,  $J$  = 2.5 Hz), 16.3, 15.9;  $^{19}\text{F NMR}$  (376 MHz,  $\text{CDCl}_3$ )  $\delta$  66.6; **HRMS** (ASAP): calculated for  $\text{C}_{18}\text{H}_{22}\text{FO}_5\text{S}$  [ $\text{M}+\text{H}$ ]:  $m/z$  = 369.1172,  $m/z$  found 369.1169; **IR**  $\nu_{\text{max}}$  (ATR)/ $\text{cm}^{-1}$ : 2979, 2934, 1674, 1412, 1265, 787.

### 1,4-Dimethyl-3-(4-propylphenyl)-7-oxabicyclo[2.2.1]hepta-2,5-diene-2-sulfonyl fluoride (4In)

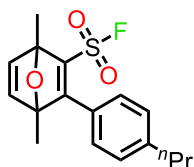

Following general procedure O, the title compound was isolated after purification by flash column chromatography (0-15% EtOAc in petroleum ether) as a yellow oil (25.0 mg, 78%);  $^1\text{H NMR}$  (400 MHz,  $\text{CDCl}_3$ )  $\delta$  7.28 – 7.23 (m, 2H), 7.17 (appt. d,  $J$  = 5.1 Hz, 1H), 7.12 – 7.07 (m, 2H), 7.02 (appt. d,  $J$  = 5.1 Hz, 1H), 2.68 – 2.58

(m, 2H), 2.01 – 1.93 (m, 3H), 1.74 – 1.66 (m, 2H), 1.65 (s, 3H), 0.97 (t,  $J = 7.3$  Hz, 3H);  $^{13}\text{C NMR}$  (101 MHz,  $\text{CDCl}_3$ )  $\delta$  175.8 (d,  $J = 4.9$  Hz), 148.6, 145.4, 145.0, 142.5 (d,  $J = 30.9$  Hz), 128.4, 127.0, 126.6, 94.9, 92.2, 37.9, 24.1, 15.9, 15.6, 13.8;  $^{19}\text{F NMR}$  (376 MHz,  $\text{CDCl}_3$ )  $\delta$  66.1; **HRMS** (ESI<sup>+</sup>): calculated for  $\text{C}_{17}\text{H}_{19}\text{FO}_3\text{SNa}$  [ $\text{M}+\text{Na}^+$ ]:  $m/z = 345.0931$ ,  $m/z$  found 345.0932; **IR**  $\nu_{\text{max}}$  (ATR)/ $\text{cm}^{-1}$ : 3028, 2961, 2935, 2872, 1613, 1404, 1197, 759.

### 1,3,4-Triphenyl-1,4-dihydro-1,4-epoxynaphthalene-2-sulfonyl fluoride (4lo)

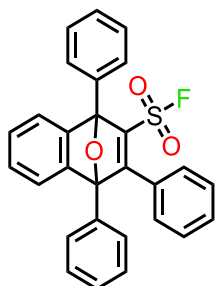

Following general procedure N (0.30 mmol of the required diene used), the title compound was isolated after purification by flash column chromatography (0-15% EtOAc in petroleum ether) as a colourless solid (43.0 mg, 95%). **m.p.** 69 - 70 °C;  $^1\text{H NMR}$  (400 MHz,  $\text{CDCl}_3$ )  $\delta$  7.97 (d,  $J = 7.6$  Hz, 2H), 7.76 – 7.68 (m, 1H), 7.59 – 7.53 (m, 1H), 7.53 – 7.40 (m, 3H), 7.38 (dd,  $J = 5.8, 2.2$  Hz, 2H), 7.34 – 7.14 (m, 8H), 7.01 (d,  $J = 7.1$  Hz, 2H);  $^{13}\text{C NMR}$  (101 MHz,  $\text{CDCl}_3$ )  $\delta$  173.3 (d,  $J = 2.9$  Hz), 149.3, 147.7, 145.1 (d,  $J = 26.5$  Hz), 132.6, 132.0, 130.5, 130.4, 129.6, 129.2, 128.9, 128.8, 128.5, 128.3, 128.2, 127.6, 126.9, 126.4, 122.7 (d,  $J = 8.2$  Hz), 96.3, 94.1;  $^{19}\text{F NMR}$  (376 MHz,  $\text{CDCl}_3$ )  $\delta$  67.4; **HRMS** (ESI<sup>+</sup>): calculated for  $\text{C}_{28}\text{H}_{19}\text{FO}_3\text{SK}$  [ $\text{M}+\text{K}^+$ ]:  $m/z = 493.0670$ ,  $m/z$  found 493.0676; **IR**  $\nu_{\text{max}}$  (ATR)/ $\text{cm}^{-1}$ : 3062, 2932, 2601, 2359, 1590, 1406, 1199, 748.

### 3-(4-Isopropylphenyl)-1,4-diphenyl-1,4-dihydro-1,4-epoxynaphthalene-2-sulfonyl fluoride (4lp)

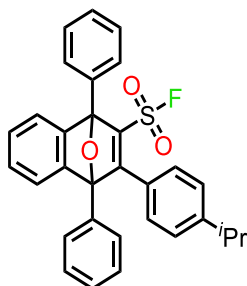

Following general procedure N, the title compound was isolated after purification by flash column chromatography (0-15% EtOAc in petroleum ether) as a colourless solid (35.0 mg, 71%). **m.p.** 116 - 118 °C;  $^1\text{H NMR}$  (400 MHz,  $\text{CDCl}_3$ )  $\delta$  8.07 – 8.00 (m, 2H), 7.81 – 7.75 (m, 1H), 7.69 – 7.63 (m, 1H), 7.59 – 7.44 (m, 5H), 7.41 – 7.31 (m, 3H), 7.30 – 7.24 (m, 2H), 7.18 (appt. d,  $J = 8.2$  Hz, 2H), 7.08 (appt. d,  $J = 8.3$  Hz, 2H), 2.96 – 2.83 (m, 1H), 1.23 (dd,  $J = 6.9, 1.6$  Hz, 6H);  $^{13}\text{C NMR}$  (101 MHz,  $\text{CDCl}_3$ )  $\delta$  173.3 (d,  $J = 2.7$  Hz), 151.8, 149.4, 147.7, 143.9 (d,  $J = 25.7$  Hz), 132.8, 132.2, 129.6, 129.4, 129.3, 128.8, 128.5, 128.4, 127.9, 127.7, 126.9, 126.4, 126.3, 122.9, 96.5,

94.4, 34.1, 23.7 (d,  $J = 7.9$  Hz);  $^{19}\text{F}$  NMR (376 MHz,  $\text{CDCl}_3$ )  $\delta$  67.5; HRMS (ESI $^+$ ): calculated for  $\text{C}_{31}\text{H}_{25}\text{FO}_3\text{SNa}$  [ $\text{M}+\text{Na}^+$ ]:  $m/z = 519.1400$ ,  $m/z$  found 519.1402; IR  $\nu_{\text{max}}$  (ATR)/ $\text{cm}^{-1}$ : 3063, 2963, 2869, 2361, 1400, 1198, 996, 748.

**3-(4-(Cyclohexyloxy)-3-methoxyphenyl)-1,4-diphenyl-1,4-dihydro-1,4-epoxynaphthalene-2-sulfonyl fluoride (4lq)**

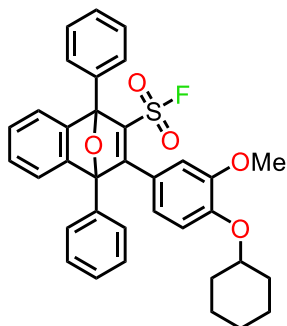

Following general procedure N, the title compound was isolated after purification by flash column chromatography (0-15% EtOAc in petroleum ether) as a colourless solid (45.0 mg, 78%). **m.p.** 87 - 88 °C;  $^1\text{H}$  NMR (400 MHz,  $\text{CDCl}_3$ )  $\delta$  8.05 – 7.98 (m, 2H), 7.80 – 7.74 (m, 1H), 7.69 – 7.65 (m, 1H), 7.59 – 7.47 (m, 5H), 7.42 – 7.33 (m, 3H), 7.31 – 7.23 (m, 2H), 6.84 – 6.70 (m, 3H), 4.31 – 4.11 (m, 1H), 3.68 (s, 3H), 2.08 – 1.96 (m, 2H), 1.89 – 1.77 (m, 2H), 1.66 – 1.48 (m, 3H), 1.41 – 1.20 (m, 3H);  $^{13}\text{C}$  NMR (101 MHz,  $\text{CDCl}_3$ )  $\delta$  172.8, 149.7, 149.5, 149.4, 147.6, 141.9 (d,  $J = 24.4$  Hz), 133.0, 132.4, 129.7, 129.6, 129.3, 128.8, 128.6, 128.6, 126.9, 126.2, 113.9, 112.4, 96.5, 94.6, 77.1, 56.0, 31.9 (d,  $J = 2.2$  Hz), 25.6, 24.1;  $^{19}\text{F}$  NMR (376 MHz,  $\text{CDCl}_3$ )  $\delta$  67.2; HRMS (ESI $^+$ ): calculated for  $\text{C}_{35}\text{H}_{31}\text{FO}_5\text{SNa}$  [ $\text{M}+\text{Na}^+$ ]:  $m/z = 605.1768$ ,  $m/z$  found 605.1768; IR  $\nu_{\text{max}}$  (ATR)/ $\text{cm}^{-1}$ : 3157, 2936, 2861, 1503, 1402, 1004, 751.

## Synthesis and experimental data for compounds 6a-6l

### General Procedure P

To a solution of the required sulfonyl fluoride **4** (100  $\mu$ mol) and the required aryl silyl-ether **5** (100  $\mu$ mol) in a solution of MeCN (400  $\mu$ L) was added DBU (3.00  $\mu$ L, 20.0  $\mu$ mol). The reaction mixture was stirred at room temperature for 1 h. The reaction mixture was extracted into EtOAc (5.00 mL), then washed with brine (10.0 mL) and H<sub>2</sub>O (10.0 mL). The aqueous layer was then extracted with EtOAc (5.00 mL), the organic fractions combined, dried over anhydrous MgSO<sub>4</sub>, filtered under vacuum and the solvent was removed under reduced pressure to obtain the analytically pure product.

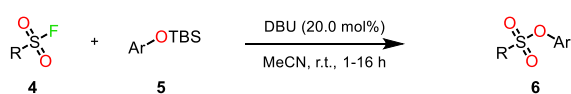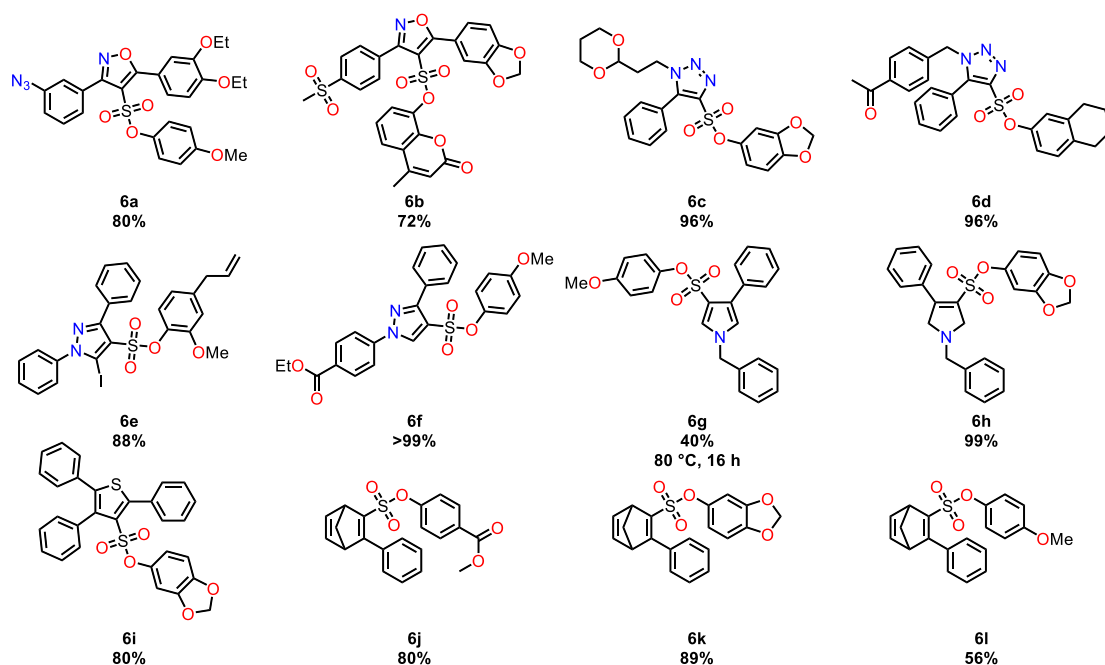

### 4-Methoxyphenyl 3-(3-azidophenyl)-5-(3,4-diethoxyphenyl)isoxazole-4-sulfonate (**6a**)

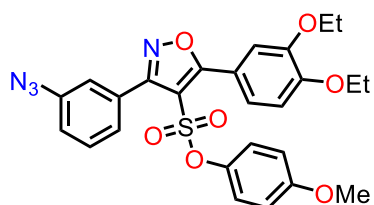

Following general procedure P, the title compound was isolated after purification by flash column chromatography (0-15% EtOAc in petroleum ether) as a brown solid (43.0 mg, 80%). **m.p.** 87 - 88 °C; **<sup>1</sup>H NMR** (500 MHz, CDCl<sub>3</sub>)  $\delta$  7.53 (dd,  $J$  = 8.5, 2.2 Hz, 1H), 7.49 (d,  $J$  = 2.1 Hz, 1H), 7.41 (appt. t,  $J$  = 7.9 Hz, 1H), 7.25 (ddd,

$J = 7.7, 1.5, 1.0$  Hz, 1H), 7.15 (ddd,  $J = 8.1, 2.3, 1.0$  Hz, 1H), 7.08 – 7.06 (m, 1H), 6.98 (d,  $J = 8.5$  Hz, 1H), 6.90 (appt. d,  $J = 9.2$  Hz, 2H), 6.80 (appt. d,  $J = 9.2$  Hz, 2H), 4.20 (q,  $J = 7.0$  Hz, 2H), 4.13 (q,  $J = 7.0$  Hz, 2H), 3.79 (s, 3H), 1.52 (t,  $J = 6.4$  Hz, 3H), 1.49 (t,  $J = 6.4$  Hz, 3H);  $^{13}\text{C}$  NMR (126 MHz,  $\text{CDCl}_3$ )  $\delta$  173.8, 161.8, 158.8, 152.6, 148.5, 142.5, 140.3, 129.7, 128.7, 126.1, 123.5, 123.3, 121.0, 120.2, 117.1, 114.9, 113.9, 112.4, 110.1, 64.9, 64.7, 55.8, 14.8, 14.8; HRMS (ESI<sup>+</sup>): calculated for  $\text{C}_{26}\text{H}_{25}\text{N}_4\text{O}_7\text{S}$  [M+H<sup>+</sup>]:  $m/z = 537.1438$ ,  $m/z$  found 537.1440; IR  $\nu_{\text{max}}$  (ATR)/ $\text{cm}^{-1}$ : 3079, 2976, 2100, 1603, 1562, 1500, 1450, 1388, 1290, 1252, 1149, 1032, 845, 794.

**4-Methyl-2-oxo-2H-chromen-8-yl 5-(benzo[d][1,3]dioxol-5-yl)-3-(4-(methylsulfonyl)phenyl)isoxazole-4-sulfonate (6b)**

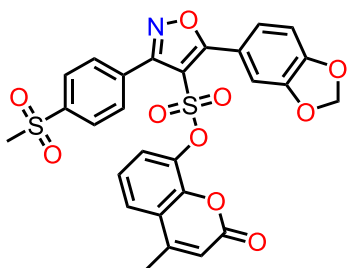

Following general procedure P, the title compound was isolated after filtration and washing with  $\text{Et}_2\text{O}$  as a colourless solid (42.0 mg, 72%). **m.p.** 230 - 231 °C;  $^1\text{H}$  NMR (500 MHz, DMSO)  $\delta$  8.03 (appt. d,  $J = 8.6$  Hz, 2H), 7.79 – 7.76 (m, 3H), 7.32 (dd,  $J = 8.2, 1.8$  Hz, 1H), 7.25 (d,  $J = 2.4$  Hz, 1H), 7.18 (d,  $J = 1.7$  Hz, 1H), 7.13 (dd,  $J = 8.7, 2.4$  Hz, 1H), 7.10 (d,  $J = 8.2$  Hz, 1H), 6.48 (q,  $J = 1.3$  Hz, 1H), 6.16 (s, 2H), 3.31 (s, 3H), 2.44 (d,  $J = 1.3$  Hz, 3H);  $^{13}\text{C}$  NMR (126 MHz, DMSO)  $\delta$  174.1, 160.5, 159.2, 153.4, 152.5, 151.1, 149.7, 147.5, 142.6, 131.1, 130.5, 127.2, 126.8, 125.3, 119.4, 118.4, 117.3, 114.8, 110.8, 110.4, 108.9, 108.6, 102.4, 43.2, 18.1; HRMS (ESI<sup>+</sup>): calculated for  $\text{C}_{27}\text{H}_{19}\text{NO}_{10}\text{S}_2\text{Na}$  [M+Na<sup>+</sup>]:  $m/z = 604.0343$ ,  $m/z$  found 604.0345; IR  $\nu_{\text{max}}$  (ATR)/ $\text{cm}^{-1}$ : 3094, 3073, 3001, 2884, 2795, 1721, 1607, 1579, 1485, 1370, 1257, 1145, 1109, 813, 774.

**Benzo[d][1,3]dioxol-5-yl 1-(2-(1,3-dioxan-2-yl)ethyl)-5-phenyl-1H-1,2,3-triazole-4-sulfonate (6c)**

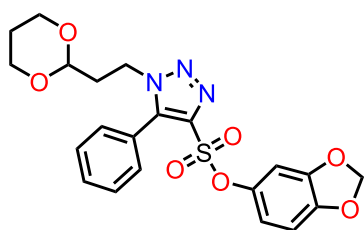

Following general procedure P, the title compound was isolated after purification by flash column chromatography (0-20% EtOAc in petroleum ether) as an orange gum (44.0 mg, 96%).  $^1\text{H}$  NMR (500 MHz,  $\text{CDCl}_3$ )  $\delta$  7.56 – 7.52 (m, 1H), 7.50 – 7.45 (m, 2H), 7.20 – 7.17 (m, 2H), 6.66 (d,  $J = 8.5$  Hz, 1H), 6.59 (d,  $J = 2.4$  Hz, 1H), 6.51 (dd,  $J = 8.5, 2.4$  Hz, 1H), 5.97 (s, 2H), 4.50 (t,  $J = 4.7$  Hz, 1H), 4.35 (t,  $J = 7.0$  Hz, 2H), 4.01 – 3.96 (m, 2H), 3.68 – 3.61 (m, 2H), 2.12 (td,  $J = 7.0, 4.7$  Hz, 2H), 1.96 (dddt,  $J = 22.5, 17.5, 12.5, 5.0$  Hz, 1H), 1.29 (dtt,  $J = 13.5, 2.6,$



1.3 Hz, 1H);  $^{13}\text{C NMR}$  (126 MHz,  $\text{CDCl}_3$ )  $\delta$  148.2, 146.7, 143.6, 141.0, 139.6, 130.9, 129.7, 128.9, 123.8, 115.4, 108.0, 104.6, 102.1, 98.8, 66.9, 44.5, 34.8, 25.6; **HRMS** ( $\text{ESI}^+$ ): calculated for  $\text{C}_{21}\text{H}_{21}\text{N}_3\text{O}_7\text{SNa}$  [ $\text{M}+\text{Na}^+$ ]:  $m/z = 482.0992$ ,  $m/z$  found 482.0990; **IR**  $\nu_{\text{max}}$  (ATR)/ $\text{cm}^{-1}$ : 3063, 2960, 2928, 2851, 1483, 1381, 1240, 1161, 1138, 1115, 1093, 1038, 945, 860, 834, 769, 738.

#### 5,6,7,8-Tetrahydronaphthalen-2-yl 1-(4-acetylbenzyl)-5-phenyl-1H-1,2,3-triazole-4-sulfonate (6d)

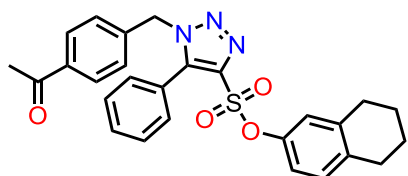

Following general procedure P, the title compound was isolated as an orange gum (47.0 mg, 96%).  $^1\text{H NMR}$  (500 MHz,  $\text{CDCl}_3$ )  $\delta$  7.86 (appt. d,  $J = 8.5$  Hz, 2H), 7.51 – 7.46 (m, 1H), 7.34 (appt. t,  $J = 7.8$  Hz, 2H), 7.04 (appt. d,  $J = 8.5$  Hz, 2H), 6.90 (d,  $J = 8.3$  Hz, 1H), 6.83 – 6.79 (m, 2H), 6.72 – 6.66 (m, 2H), 5.44 (s, 2H), 2.69 (t,  $J = 6.0$  Hz, 2H), 2.60 – 2.56 (m, 5H), 1.78 – 1.69 (m, 4H);  $^{13}\text{C NMR}$  (126 MHz,  $\text{CDCl}_3$ )  $\delta$  197.3, 147.00, 141.3, 140.2, 139.0, 138.9, 137.4, 136.6, 131.0, 130.2, 129.7, 129.0, 128.8, 127.8, 123.5, 122.6, 119.4, 52.3, 29.4, 29.0 (s), 26.8, 23.0, 22.8; **HRMS** ( $\text{ESI}^+$ ): calculated for  $\text{C}_{27}\text{H}_{26}\text{N}_3\text{O}_4\text{S}$  [ $\text{M}+\text{H}^+$ ]:  $m/z = 488.1639$ ,  $m/z$  found 488.1640; **IR**  $\nu_{\text{max}}$  (ATR)/ $\text{cm}^{-1}$ : 2927, 2857, 1681, 1609, 1492, 1386, 1264, 1174, 923, 788, 695.

#### 4-Methoxyphenyl 1-benzyl-4-phenyl-1H-pyrrole-3-sulfonate (6e)

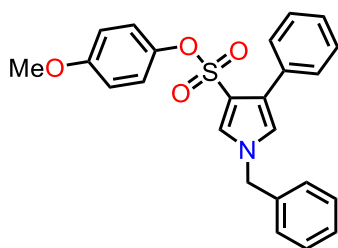

Following general procedure P (heating to 80 °C for 1.5 h), the title compound was isolated after purification by flash column chromatography (0-20% EtOAc in petroleum ether) as a colourless gum (17.0 mg, 40%).  $^1\text{H NMR}$  (500 MHz,  $\text{CDCl}_3$ )  $\delta$  7.70 – 7.66 (m, 2H), 7.42 – 7.30 (m, 6H), 7.18 (d,  $J = 2.6$  Hz, 1H), 7.09 – 7.05 (m, 2H), 6.90 (appt. d,  $J = 9.2$  Hz, 2H), 6.82 (d,  $J = 2.6$  Hz, 1H), 6.73 (appt. d,  $J = 9.2$  Hz, 2H), 5.02 (s, 2H), 3.77 (s, 3H);  $^{13}\text{C NMR}$  (126 MHz,  $\text{CDCl}_3$ )  $\delta$  158.1, 143.5, 135.6, 132.5, 129.8, 129.2, 128.9, 128.7, 128.5, 127.6, 127.4, 125.6, 123.5, 122.5, 115.1, 114.4, 55.7, 54.3; **HRMS** ( $\text{ESI}^+$ ): calculated for  $\text{C}_{24}\text{H}_{21}\text{NO}_4\text{SNa}$  [ $\text{M}+\text{Na}^+$ ]:  $m/z = 442.1083$ ,  $m/z$  found 442.1084; **IR**  $\nu_{\text{max}}$  (ATR)/ $\text{cm}^{-1}$ : 3128, 2925, 2852, 1500, 1361, 1249, 1149, 1106, 836, 788, 730, 694.

#### 4-Allyl-2-methoxyphenyl 5-iodo-1,3-diphenyl-1H-pyrazole-4-sulfonate (6f)

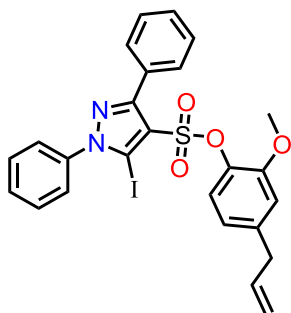

Following general procedure P (3.00 mL MeCN used, stirring for 18 h at room temperature), the title compound was isolated after purification by flash column chromatography (0-20% EtOAc in petroleum ether) as a white solid (50.0 mg, 88%). **m.p.** 140 - 142 °C **<sup>1</sup>H NMR** (400 MHz, CDCl<sub>3</sub>) δ 7.70 – 7.63 (m, 2H), 7.50 (ddd, *J* = 16.6, 7.5, 5.4 Hz, 5H), 7.44 – 7.37 (m, 3H), 7.23 (d, *J* = 8.2 Hz, 1H), 6.77 (d, *J* = 8.3 Hz, 1H), 6.73 (s, 1H), 5.95 (ddt, *J* = 16.3, 9.6, 6.6 Hz, 1H), 5.15 – 5.11 (m, 1H), 5.09 (s, 1H), 3.62 (s, 3H), 3.38 (d, *J* = 6.4 Hz, 2H); **<sup>13</sup>C NMR** (101 MHz, CDCl<sub>3</sub>) δ 155.1, 151.8, 140.9, 139.9, 136.9, 136.4, 130.8, 130.1, 129.6, 129.5, 129.4, 128.0, 127.1, 125.2, 121.5, 121.2, 116.5, 113.0, 92.1, 55.7, 40.2; **HRMS** (ESI<sup>+</sup>): calculated for C<sub>25</sub>H<sub>22</sub>I<sub>2</sub>N<sub>2</sub>O<sub>4</sub>S [M+H<sup>+</sup>]: *m/z* = 573.0339, *m/z* found 573.0355; **IR** *v*<sub>max</sub> (ATR)/cm<sup>-1</sup>: 3072, 2929, 1596, 1497, 1466, 1381.

#### Ethyl 4-((4-methoxyphenoxy)sulfonyl)-3-phenyl-1H-pyrazol-1-yl)benzoate (6g)

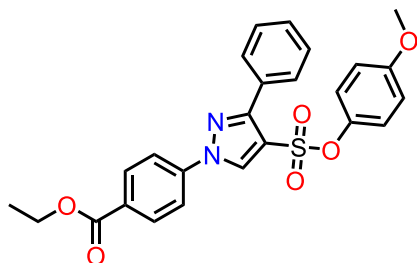

Following general procedure P, the title compound was isolated after purification by flash column chromatography (0-20% EtOAc in petroleum ether) as a colourless oil (48.0 mg, quantitative). **<sup>1</sup>H NMR** (400 MHz, CDCl<sub>3</sub>) δ 8.42 (s, 1H), 8.18 (d, *J* = 9.0 Hz, 2H), 8.12 – 8.07 (m, 2H), 7.81 (d, *J* = 9.0 Hz, 2H), 7.55 – 7.48 (m, 3H), 6.94 (d, *J* = 9.3 Hz, 2H), 6.75 (d, *J* = 9.3 Hz, 2H), 4.42 (q, *J* = 7.1 Hz, 2H), 3.74 (s, 3H), 1.43 (t, *J* = 7.1 Hz, 3H); **<sup>13</sup>C NMR** (101 MHz, CDCl<sub>3</sub>) δ 165.6, 158.5, 151.5, 143.0, 141.6, 134.0, 131.4, 130.2, 130.1, 130.0, 128.9, 128.8, 123.3, 119.0, 117.6, 114.8, 61.5, 55.7, 14.5; **HRMS** (ESI<sup>+</sup>): calculated for C<sub>25</sub>H<sub>23</sub>N<sub>2</sub>O<sub>6</sub>S [M+H<sup>+</sup>]: *m/z* = 479.1271, *m/z* found 479.1275; **IR** *v*<sub>max</sub> (ATR)/cm<sup>-1</sup>: 3124, 1705, 1607, 1504, 1375, 1279, 1194.

#### Benzo[d][1,3]dioxol-5-yl 1-benzyl-4-phenyl-2,5-dihydro-1H-pyrrole-3-sulfonate (6h)

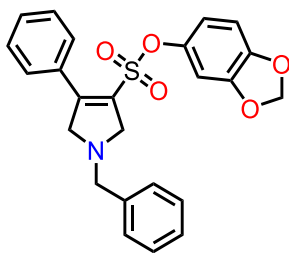

Following general procedure P (10.0  $\mu\text{mol}$  DBU used instead), the title compound was isolated after purification by flash column chromatography (0-20% EtOAc in petroleum ether) as a colourless oil (43.0 mg, 99%).  $^1\text{H NMR}$  (500 MHz,  $\text{CDCl}_3$ )  $\delta$  7.40 – 7.27 (m, 10H), 6.73 (d,  $J$  = 8.4 Hz, 1H), 6.66 (d,  $J$  = 2.4 Hz, 1H), 6.62 (dd,  $J$  = 8.4, 2.4 Hz, 1H), 5.99 (s, 2H), 3.99 (dq,  $J$  = 8.0, 4.1 Hz, 4H), 3.83 (s, 2H);  $^{13}\text{C NMR}$  (126 MHz,  $\text{CDCl}_3$ )  $\delta$  153.4, 148.2, 146.7, 143.5, 138.0, 131.3, 130.0, 128.7, 128.7, 128.2, 128.2, 127.9, 127.6, 115.2, 108.1, 104.5, 102.1, 65.5, 61.7, 59.8; **HRMS** (ESI $^+$ ): calculated for  $\text{C}_{24}\text{H}_{22}\text{NO}_5\text{S}$  [ $\text{M}+\text{H}^+$ ]:  $m/z$  = 436.1213,  $m/z$  found 436.1231; **IR**  $\nu_{\text{max}}$  (ATR)/ $\text{cm}^{-1}$ : 2901, 1606, 1478, 1363, 1246, 1158, 1089, 1034.

#### 4-Methoxyphenyl 3-phenylbicyclo[2.2.1]hepta-2,5-diene-2-sulfonate (6i)

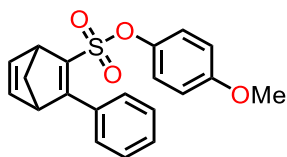

Following general procedure P, the title compound was isolated after purification by flash column chromatography (0-25%  $\text{Et}_2\text{O}$  in petroleum ether) as a colourless solid (20.0 mg, 56%). **m.p.** 79 - 80  $^\circ\text{C}$ ;  $^1\text{H NMR}$  (400 MHz,  $\text{CDCl}_3$ )  $\delta$  7.35 (s, 5H), 7.05 – 6.99 (m, 2H), 6.99 – 6.95 (m, 1H), 6.95 – 6.89 (m, 1H), 6.83 – 6.76 (m, 2H), 4.12 – 4.03 (m, 1H), 4.01 – 3.90 (m, 1H), 3.79 (s, 3H), 2.42 – 2.29 (m, 1H), 2.18 – 2.03 (m, 1H);  $^{13}\text{C NMR}$  (101 MHz,  $\text{CDCl}_3$ )  $\delta$  168.6, 158.3, 143.3, 142.9, 140.9, 140.5, 133.1, 129.8, 128.1, 127.9, 123.5, 114.5, 70.8, 59.6, 55.7, 55.0; **HRMS** (ESI $^+$ ): calculated for  $\text{C}_{20}\text{H}_{18}\text{O}_4\text{SNa}$  [ $\text{M}+\text{Na}^+$ ]:  $m/z$  = 377.0818,  $m/z$  found 377.0818; **IR**  $\nu_{\text{max}}$  (ATR)/ $\text{cm}^{-1}$ : 3013, 2937, 2873, 2844, 1449, 1362, 769.

#### Benzo[d][1,3]dioxol-5-yl 3-phenylbicyclo[2.2.1]hepta-2,5-diene-2-sulfonate (6j)

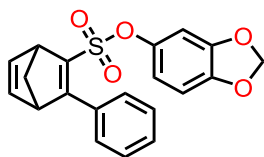

Following general procedure P, the title compound was isolated after purification by flash column chromatography (0-25%  $\text{Et}_2\text{O}$  in petroleum ether) as a colourless solid (33.0 mg, 89%). **m.p.** 71 - 72  $^\circ\text{C}$ ;  $^1\text{H NMR}$

(400 MHz, CDCl<sub>3</sub>)  $\delta$  7.44 – 7.29 (m, 5H), 7.00 (dd,  $J$  = 4.8, 2.9 Hz, 1H), 6.97 – 6.90 (m, 1H), 6.67 (d,  $J$  = 8.4 Hz, 1H), 6.60 (d,  $J$  = 2.4 Hz, 1H), 6.54 (dd,  $J$  = 8.4, 2.4 Hz, 1H), 5.97 (s, 2H), 4.13 – 4.06 (m, 1H), 3.97 (s, 1H), 2.42 – 2.31 (m, 1H), 2.18 – 2.09 (m, 1H); <sup>13</sup>C NMR (101 MHz, CDCl<sub>3</sub>)  $\delta$  168.8, 148.0, 146.4, 143.6, 143.3, 140.8, 140.5, 133.1, 129.9, 128.2, 127.9, 115.4, 107.8, 104.6, 102.0, 70.9, 59.7, 55.0; HRMS (ESI<sup>+</sup>): calculated for C<sub>20</sub>H<sub>16</sub>O<sub>5</sub>SNa [M+Na<sup>+</sup>]:  $m/z$  = 391.0610,  $m/z$  found 391.0614; IR  $\nu_{\max}$  (ATR)/cm<sup>-1</sup>: 3065, 2983, 2939, 1478, 1365, 1158, 824.

#### Methyl 4-(((3-phenylbicyclo[2.2.1]hepta-2,5-dien-2-yl)sulfonyl)oxy)benzoate (6k)

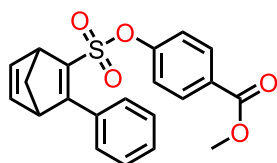

Following general procedure P, the title compound was isolated after purification by flash column chromatography (0-25% Et<sub>2</sub>O in petroleum ether) as a colourless solid (31.0 mg, 80%). **m.p.** 63 - 64 °C; <sup>1</sup>H NMR (400 MHz, CDCl<sub>3</sub>)  $\delta$  7.96 (appt. d,  $J$  = 8.7 Hz, 2H), 7.36 (s, 5H), 7.08 (appt. d,  $J$  = 8.8 Hz, 2H), 6.91 (dt,  $J$  = 8.3, 5.2 Hz, 2H), 4.14 – 4.07 (m, 1H), 3.99 – 3.92 (m, 1H), 3.91 (s, 3H), 2.37 – 2.31 (m, 1H), 2.15 – 2.10 (m, 1H); <sup>13</sup>C NMR (101 MHz, CDCl<sub>3</sub>)  $\delta$  169.3, 166.1, 153.0, 143.2, 140.8, 140.5, 133.0, 131.3, 130.1, 128.7, 128.2, 127.9, 122.1, 71.0, 59.7, 54.9, 52.4; HRMS (ESI<sup>+</sup>): calculated for C<sub>21</sub>H<sub>18</sub>O<sub>5</sub>SNa [M+Na<sup>+</sup>]:  $m/z$  = 405.0767,  $m/z$  found 405.0764; IR  $\nu_{\max}$  (ATR)/cm<sup>-1</sup>: 3069, 2998, 2949, 2873, 1721, 1277, 1148, 865.

#### Benzo[d][1,3]dioxol-5-yl 2,4,5-triphenylthiophene-3-sulfonate (6l)

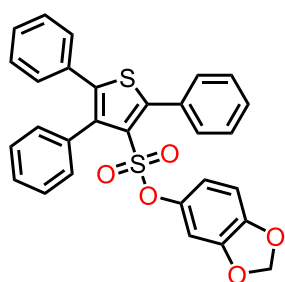

Following general procedure P, the title compound was isolated after purification by flash column chromatography (0-25% Et<sub>2</sub>O in petroleum ether) as a colourless solid (41.0 mg, 80%). **m.p.** 152 - 154 °C; <sup>1</sup>H NMR (400 MHz, CDCl<sub>3</sub>)  $\delta$  7.51 – 7.39 (m, 5H), 7.39 – 7.33 (m, 5H), 7.26 – 7.20 (m, 3H), 7.20 – 7.14 (m, 2H), 6.64 (d,  $J$  = 8.4 Hz, 1H), 6.34 – 6.27 (m, 1H), 6.28 – 6.20 (m, 1H), 5.96 (s, 2H); <sup>13</sup>C NMR (101 MHz, CDCl<sub>3</sub>)  $\delta$  150.7, 148.0, 146.4, 142.9, 141.3, 137.8, 134.4, 132.5, 131.8, 131.2, 130.23, 130.1, 129.5, 129.4, 128.6, 128.3, 128.2, 128.1, 128.1, 115.3, 107.9, 104.7, 101.9; HRMS (ESI<sup>+</sup>): calculated for C<sub>29</sub>H<sub>20</sub>O<sub>5</sub>S<sub>2</sub>Na [M+Na<sup>+</sup>]:  $m/z$  = 535.0644,  $m/z$  found 534.0647; IR  $\nu_{\max}$  (ATR)/cm<sup>-1</sup>: 2929, 2865, 1481, 1373, 1054, 835.

### LLAMA and principle moments of inertia (PMI) analysis for DOC and SuFEx libraries

LLAMA (Lead-Likeness and Molecular Analysis) is an open access tool for assessing the lead-likeness and novelty of molecular scaffolds where the plot possesses a lead-like chemical space (Alog P of -1 to 3 and RMM of 200 to 350) and a 'Lipinski' space (Alog P <5 and RMM <500). Using a set of criteria each molecule or scaffold is also given a lead-likeness penalty. The lead-likeness penalty is a measure of how far outside lead-like space a compound lies. For each of the key properties (heavy atom count, AlogP, number of aromatic rings and an undesirable functional group filter) the compound gains penalty points dependent on how far outside the ideal space it lies. The overall score is the sum of these individual penalties (for more information on the scoring criteria see Colomer *et al.*, 2016).<sup>[20]</sup>

Using the LLAMA package the principal moments of inertia (PMI) of each molecule can also be determined to assess the shape distribution of a library. The three vertices of the triangular plot represent the extremes of molecular geometry. The top left-hand corner represents a linear molecule (diacetylene), the top right-hand corner represents a spherical molecule (adamantane) and the bottom corner represents a disc-like molecule (benzene). To generate the PMI coordinates for each molecule, the system randomly generates a number of 3D conformers, minimises their energy and selects the lowest-energy conformer. The system then calculates the moments of inertia in the x, y and z axes. The PMI plot I1 coordinates are calculated by dividing inertia(x) by inertia(z). The I2 coordinates are calculated by dividing inertia(y) by inertia(z).<sup>[21]</sup>

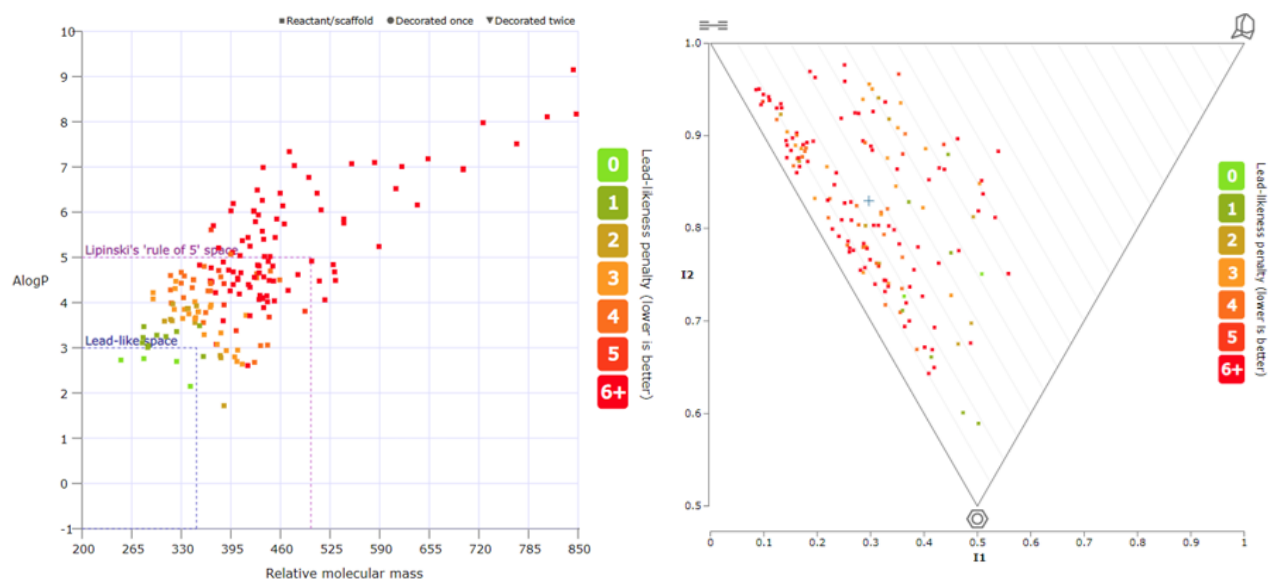

**Figure S1.** Lead-likeness analysis and PMI analysis of the DOC library using the LLAMA software package.

Of the 173 DOC compounds (Figure S-1) 2.30% were deemed to be in lead-like chemical space with 68.0% in 'Lipinski' space; indicating that the majority of the library could be considered 'drug-like'. A principle moment of inertia (PMI) plot for the library suggests that the majority of the library lies between the linear (diacetylene) and the flat disc-like (benzene) sections— this is inherently related to the nature of the cycloaddition reactions and the  $sp^2$  rich products. In comparison, the sulfonate modification compound library 0% were deemed to be

in lead-like chemical space and 28.3% in 'Lipinski' space, most likely due to the increase in molecular weight and the addition of an extra ring through SuFEx modification. The sulfonate products however, had a more diverse PMI compared to the DOC library and can be used to increase the 3D nature of the library.

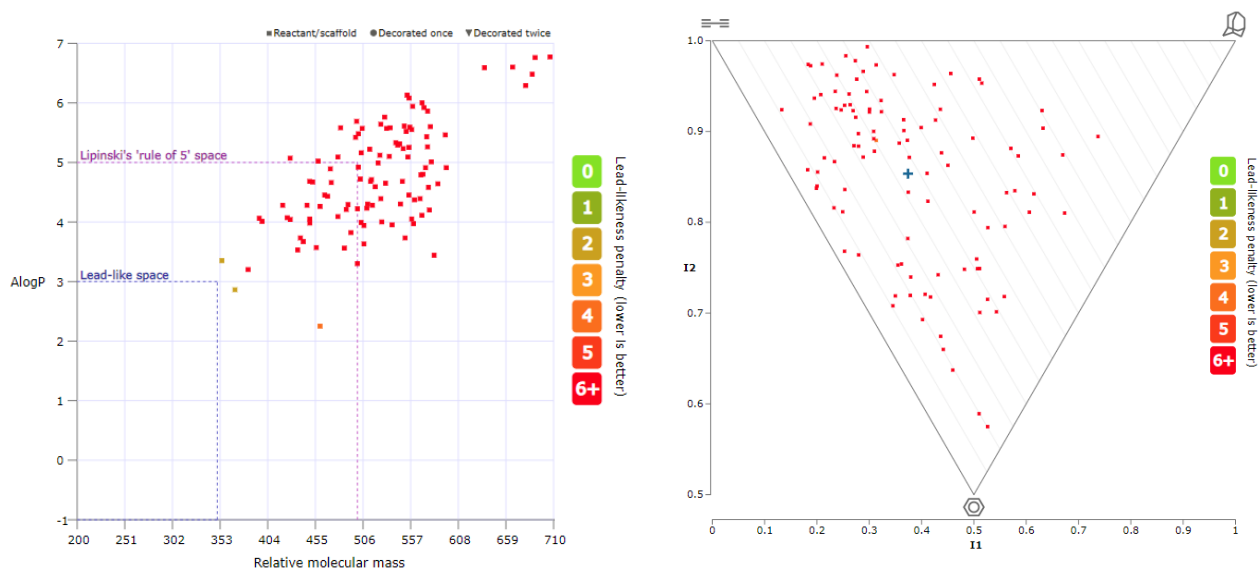

**Figure S2.** Lead-likeness analysis and PMI analysis of the sulfonate library using the LLAMA software package.

## Antibacterial assays and method

Effects of molecules on bacterial growth and minimum inhibitory concentrations (MIC) were determined as described previously,<sup>[22,23]</sup> using a modified CLSI microbroth dilution method in 100  $\mu$ L of Mueller Hinton broth containing 2-fold dilutions of molecules with 2% DMSO at the highest concentration. DMSO vehicle or methicillin were used as controls. The MIC was defined as the lowest concentration of molecules that resulted in no increase in growth relative to background at 24 hours.

**Table 1.** Hit compounds after screening **4a-h** and **4k-l** library originally at 200  $\mu$ M, followed by the determination of MICs

| #          | Structure                                                                           | MIC<br>( <i>Staphylococcus aureus</i> USA300) | #          | Structure                                                                            | MIC<br>( <i>Staphylococcus aureus</i> USA300) |
|------------|-------------------------------------------------------------------------------------|-----------------------------------------------|------------|--------------------------------------------------------------------------------------|-----------------------------------------------|
|            | Methicillin                                                                         | 5.00 $\mu$ g/mL                               |            |                                                                                      |                                               |
| <b>4ea</b> | 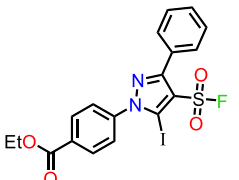  | 0.625 $\mu$ g/mL                              | <b>4ef</b> |   | 5.00 $\mu$ g/mL                               |
| <b>4eb</b> |  | 0.625 $\mu$ g/mL                              | <b>4eg</b> |  | 5.00 $\mu$ g/mL                               |
| <b>4ec</b> |  | 2.50 $\mu$ g/mL                               | <b>4eh</b> |  | 5.00-10.0 $\mu$ g/mL                          |
| <b>4ed</b> |  | 1.25 $\mu$ g/mL                               | <b>4ei</b> |  | ~20.0 $\mu$ g/mL                              |
| <b>4ee</b> |  | 0.625 $\mu$ g/mL                              | <b>4ka</b> |  | >40.0 $\mu$ g/mL<br>(100 $\mu$ M)             |

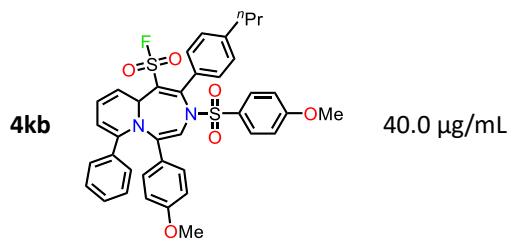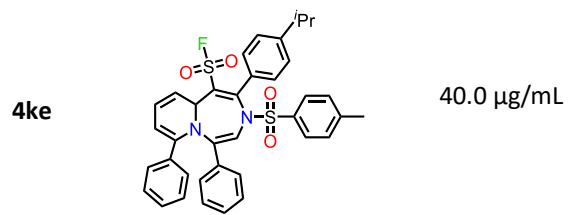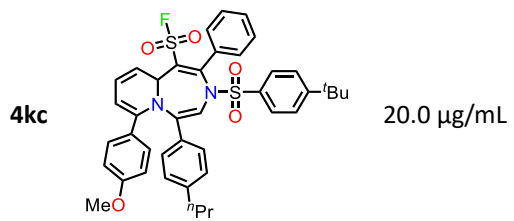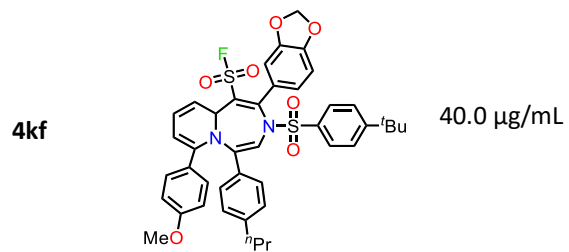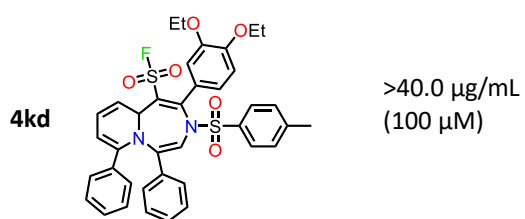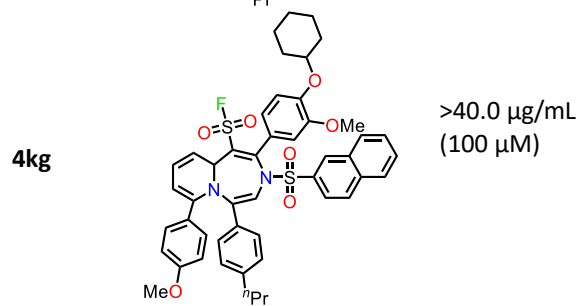



## References

- [1] H. Fujiwara, Y. Ogasawara, K. Yamaguchi, N. Mizuno, *Angew. Chem. Int. Ed.* **2007**, *46*, 5202–5205.
- [2] T. Slagbrand, G. Kervefors, F. Tinnis, H. Adolfsson, *Adv. Synth. Catal.* **2017**, *359*, 1990–1995.
- [3] T. Yakura, M. Nakazawa, T. Takino, M. Ikeda, *Chem. Pharm. Bull.* **1992**, *40*, 2014–2018.
- [4] C. Z. Luo, P. Gandeepan, Y. C. Wu, W. C. Chen, C. H. Cheng, *RSC Adv.* **2015**, *5*, 106012–106018.
- [5] M. Giustiniano, F. Meneghetti, V. Mercalli, M. Varese, F. Giustiniano, E. Novellino, G. Cesare Tron, *Org. Lett.* **2014**, *16*, 5332–5335.
- [6] H. Liu, D. Audisio, L. Plougastel, E. Decuypere, D. A. Buisson, O. Koniev, S. Kolodych, A. Wagner, M. Elhabiri, A. Krzyczmonik, et al., *Angew. Chem. Int. Ed.* **2016**, *55*, 12073–12077.
- [7] C. Favre, L. De Cremoux, J. Badaut, F. Friscourt, *J. Org. Chem.* **2018**, *83*, 2058–2066.
- [8] S. Kathiravan, I. A. Nicholls, *Chem. Eur. J.* **2017**, *23*, 7031–7036.
- [9] S. O’Sullivan, E. Doni, T. Tuttle, J. A. Murphy, *Angew. Chem. Int. Ed.* **2014**, *53*, 474–478.
- [10] G. Bélanger, M. April, É. Dauphin, S. Roy, *J. Org. Chem.* **2007**, *72*, 1104–1111.
- [11] Y. Rao, X. Li, P. Nagorny, J. Hayashida, S. J. Danishefsky, *Tetrahedron Lett.* **2009**, *50*, 6684–6686.
- [12] W. R. Sponholtz III, H. A. Trujillo, G. W. Gribble, *Tetrahedron Lett.* **2000**, *41*, 1687–1690.
- [13] S. N. Li, B. Yu, J. Liu, H. L. Li, R. Na, *Synlett* **2016**, *27*, 282–286.
- [14] F. De Simone, T. Saget, F. Benfatti, S. Almeida, J. Waser, *Chem. Eur. J.* **2011**, *17*, 14527–14538.
- [15] N. Selander, B. T. Worrell, V. V. Fokin, *Angew. Chem. Int. Ed.* **2012**, *51*, 13054–13057.
- [16] D. J. Lee, H. S. Han, J. Shin, E. J. Yoo, *J. Am. Chem. Soc.* **2014**, *136*, 11606–11609.
- [17] L. Y. Liu, K. S. Yeung, J. Q. Yu, *Chem. Eur. J.* **2019**, *25*, 2199–2202.
- [18] W. Song, N. Zheng, M. Li, K. Dong, J. Li, K. Ullah, Y. Zheng, *Org. Lett.* **2018**, *20*, 6705–6709.
- [19] V. L. Mykhalchuk, V. S. Yarmolchuk, R. O. Doroschuk, A. A. Tolmachev, O. O. Grygorenko, *European J. Org. Chem.* **2018**, 2870–2876.
- [20] I. Colomer, C. J. Empson, P. Craven, Z. Owen, R. G. Doveson, I. Churcher, S. P. Marsden, A. Nelson, *Chem. Commun.* **2016**, *52*, 7209–7212.
- [21] W. H. B. Sauer, M. K. Schwarz, *J. Chem. Inf. Comput. Sci.* **2003**, *43*, 987–1003.
- [22] P. A. Smith, T. C. Roberts, F. E. Romesberg, *Chem. Biol.* **2010**, *17*, 1223–1231.
- [23] S. Kitamura, A. Owensby, D. Wall, D. W. Wolan, *Cell Chem. Biol.* **2018**, *25*, 301-308.e12.

## X-ray crystallography data

X-ray data of structure **4aa** (CCDC1983970)

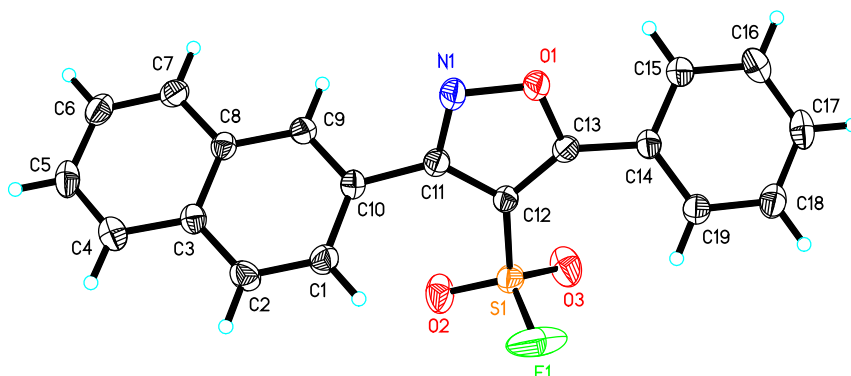

## Datablock: d8v19481

Bond precision: C-C = 0.0041 Å Wavelength=0.71073  
Cell: a=6.0654(9) b=14.541(3) c=18.061(3)  
alpha=90 beta=90.981(4) gamma=90  
Temperature: 293 K

|                        | Calculated       | Reported         |
|------------------------|------------------|------------------|
| Volume                 | 1592.7(5)        | 1592.7(4)        |
| Space group            | P 21/n           | P 21/n           |
| Hall group             | -P 2yn           | -P 2yn           |
| Moiety formula         | C19 H12 F N O3 S | ?                |
| Sum formula            | C19 H12 F N O3 S | C19 H12 F N O3 S |
| Mr                     | 353.36           | 353.36           |
| Dx, g cm <sup>-3</sup> | 1.474            | 1.474            |
| Z                      | 4                | 4                |
| Mu (mm <sup>-1</sup> ) | 0.233            | 0.233            |
| F000                   | 728.0            | 728.0            |
| F000'                  | 728.87           |                  |
| h,k,lmax               | 7,17,21          | 7,17,21          |
| Nref                   | 2961             | 2954             |
| Tmin,Tmax              | 0.959,0.975      | 0.658,0.746      |
| Tmin'                  | 0.959            |                  |

Correction method= # Reported T Limits: Tmin=0.658 Tmax=0.746 AbsCorr = MULTI-SCAN

Data completeness= 0.998

Theta(max)= 25.496

R(reflections)= 0.0573( 2245)

wR2(reflections)= 0.1469( 2954)

S = 1.081

Npar= 226

X-ray data of structure 4aq (CCDC1983972)

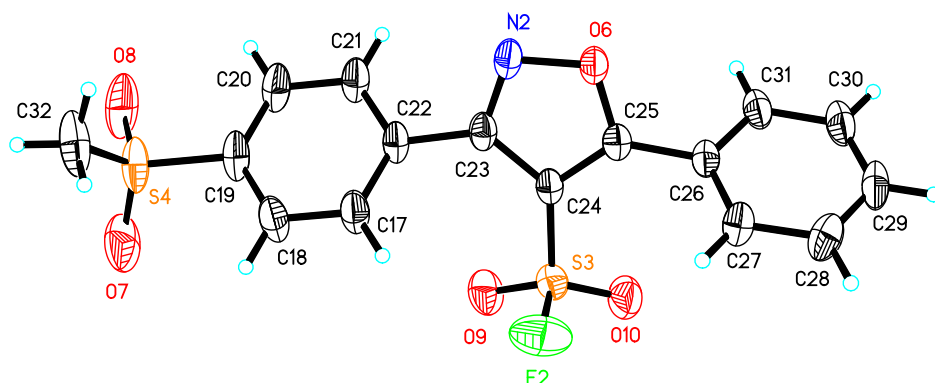

## Datablock: mo\_d8v19492\_0m

Bond precision: C-C = 0.0036 Å Wavelength=0.71073  
 Cell: a=7.8645(3) b=15.0207(6) c=15.6640(6)  
 alpha=68.380(1) beta=75.602(1) gamma=86.551(1)  
 Temperature: 293 K

|                | Calculated        | Reported          |
|----------------|-------------------|-------------------|
| Volume         | 1665.17(11)       | 1665.17(11)       |
| Space group    | P -1              | P -1              |
| Hall group     | -P 1              | -P 1              |
| Moiety formula | C16 H12 F N O5 S2 | ?                 |
| Sum formula    | C16 H12 F N O5 S2 | C16 H12 F N O5 S2 |
| Mr             | 381.39            | 381.39            |
| Dx, g cm-3     | 1.521             | 1.521             |
| Z              | 4                 | 4                 |
| Mu (mm-1)      | 0.358             | 0.358             |
| F000           | 784.0             | 784.0             |
| F000'          | 785.42            |                   |
| h,k,lmax       | 9,18,19           | 9,18,19           |
| Nref           | 6552              | 6509              |
| Tmin,Tmax      | 0.942,0.965       | 0.665,0.746       |
| Tmin'          | 0.934             |                   |

Correction method= # Reported T Limits: Tmin=0.665 Tmax=0.746 AbsCorr = MULTI-SCAN

Data completeness= 0.993 Theta(max)= 25.997  
 R(reflections)= 0.0444( 5152) wR2(reflections)= 0.1227( 6509)  
 S = 1.045 Npar= 453

X-ray data of structure 4as (CCDC1983971)

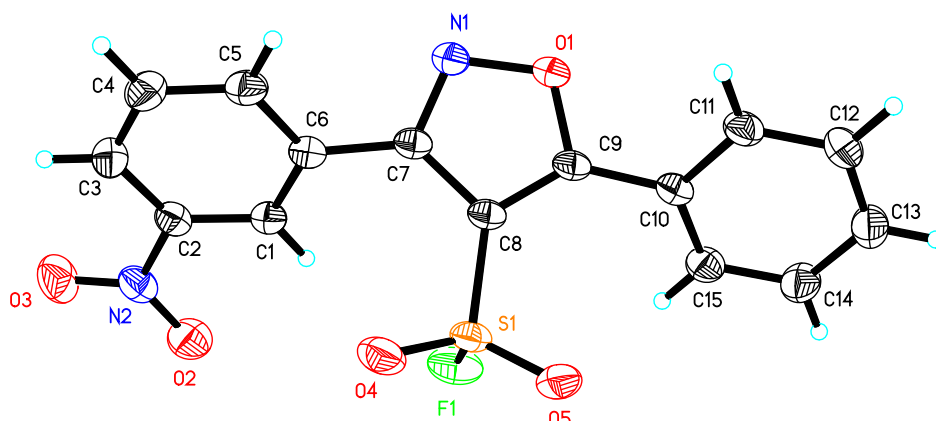

## Datablock: mo\_d8v19491\_0m

Bond precision: C-C = 0.0028 Å Wavelength=0.71073  
 Cell: a=8.5194(2) b=11.1364(3) c=15.8544(3)  
 alpha=90 beta=101.678(1) gamma=90  
 Temperature: 293 K

|                        | Calculated       | Reported         |
|------------------------|------------------|------------------|
| Volume                 | 1473.06(6)       | 1473.06(6)       |
| Space group            | P 21/c           | P 21/c           |
| Hall group             | -P 2ybc          | -P 2ybc          |
| Moiety formula         | C15 H9 F N2 O5 S | ?                |
| Sum formula            | C15 H9 F N2 O5 S | C15 H9 F N2 O5 S |
| Mr                     | 348.30           | 348.30           |
| Dx, g cm <sup>-3</sup> | 1.571            | 1.571            |
| Z                      | 4                | 4                |
| Mu (mm <sup>-1</sup> ) | 0.262            | 0.262            |
| F000                   | 712.0            | 712.0            |
| F000'                  | 712.92           |                  |
| h,k,lmax               | 10,13,19         | 10,13,19         |
| Nref                   | 2902             | 2887             |
| Tmin,Tmax              | 0.957,0.974      | 0.653,0.746      |
| Tmin'                  | 0.954            |                  |

Correction method= # Reported T Limits: Tmin=0.653 Tmax=0.746 AbsCorr = MULTI-SCAN

Data completeness= 0.995

Theta(max)= 25.997

R(reflections)= 0.0369( 2366)

wR2(reflections)= 0.1017( 2887)

S = 1.066

Npar= 218

**X-ray data of structure 4ca (CCDC1983969)**

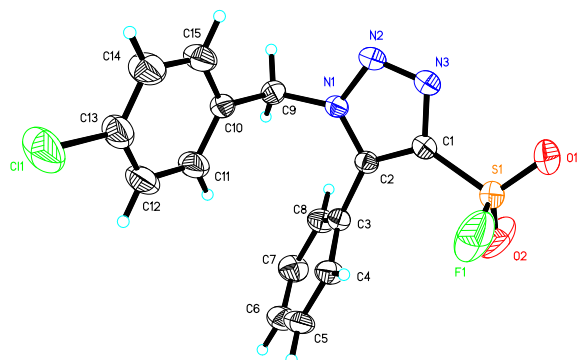

**Datablock: mo\_d8v191015\_0m**

|                                                                                    |                                              |                                 |
|------------------------------------------------------------------------------------|----------------------------------------------|---------------------------------|
| Bond precision:                                                                    | C-C = 0.0051 Å                               | Wavelength=0.71073              |
| Cell:                                                                              | a=25.8046(10)    b=14.9084(7)    c=8.5482(4) |                                 |
|                                                                                    | alpha=90    beta=105.211(1)    gamma=90      |                                 |
| Temperature: 293 K                                                                 |                                              |                                 |
|                                                                                    | Calculated                                   | Reported                        |
| Volume                                                                             | 3173.3(2)                                    | 3173.3(2)                       |
| Space group                                                                        | C 2/c                                        | C 2/c                           |
| Hall group                                                                         | -C 2yc                                       | -C 2yc                          |
| Moiety formula                                                                     | C15 H11 Cl F N3 O2 S                         | ?                               |
| Sum formula                                                                        | C15 H11 Cl F N3 O2 S                         | C15 H11 Cl F N3 O2 S            |
| Mr                                                                                 | 351.78                                       | 351.78                          |
| Dx, g cm <sup>-3</sup>                                                             | 1.473                                        | 1.473                           |
| Z                                                                                  | 8                                            | 8                               |
| Mu (mm <sup>-1</sup> )                                                             | 0.394                                        | 0.394                           |
| F000                                                                               | 1440.0                                       | 1440.0                          |
| F000'                                                                              | 1442.79                                      |                                 |
| h,k,lmax                                                                           | 31,18,10                                     | 31,18,10                        |
| Nref                                                                               | 3125                                         | 3105                            |
| Tmin,Tmax                                                                          | 0.936,0.958                                  | 0.654,0.746                     |
| Tmin'                                                                              | 0.935                                        |                                 |
| Correction method= # Reported T Limits: Tmin=0.654 Tmax=0.746 AbsCorr = MULTI-SCAN |                                              |                                 |
| Data completeness= 0.994                                                           |                                              | Theta(max)= 25.990              |
| R(reflections)= 0.0610( 2364)                                                      |                                              | wR2(reflections)= 0.1806( 3105) |
| S = 1.037                                                                          | Npar= 208                                    |                                 |
| <b>X-ray data of structure 4db (CCDC1983973)</b>                                   |                                              |                                 |

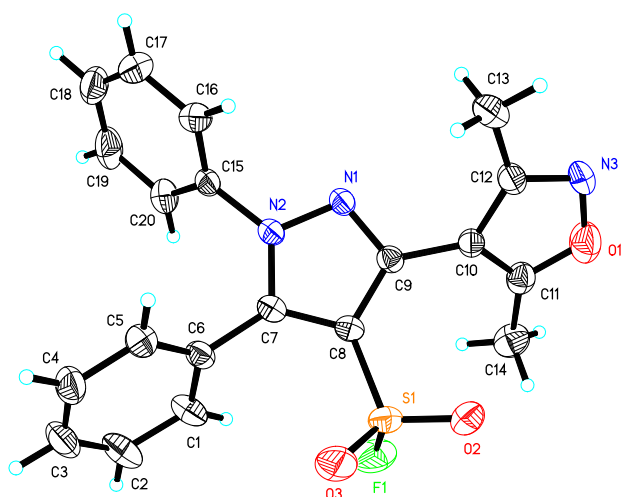

## Datablock: mo\_d8v19493\_0m

Bond precision: C-C = 0.0042 Å Wavelength=0.71073  
 Cell: a=39.5801(10) b=11.7992(3) c=17.4500(4)  
 alpha=90 beta=109.001(1) gamma=90

Temperature: 293 K

|                        | Calculated        | Reported          |
|------------------------|-------------------|-------------------|
| Volume                 | 7705.4(3)         | 7705.3(3)         |
| Space group            | C 2/c             | C 2/c             |
| Hall group             | -C 2yc            | -C 2yc            |
| Moiety formula         | C20 H16 F N3 O3 S | ?                 |
| Sum formula            | C20 H16 F N3 O3 S | C20 H16 F N3 O3 S |
| Mr                     | 397.42            | 397.42            |
| Dx, g cm <sup>-3</sup> | 1.370             | 1.370             |
| Z                      | 16                | 16                |
| Mu (mm <sup>-1</sup> ) | 0.203             | 0.203             |
| F000                   | 3296.0            | 3296.0            |
| F000'                  | 3299.56           |                   |
| h,k,lmax               | 48,14,21          | 48,14,21          |
| Nref                   | 7589              | 7568              |
| Tmin,Tmax              | 0.964,0.978       | 0.605,0.746       |
| Tmin'                  | 0.960             |                   |

Correction method= # Reported T Limits: Tmin=0.605 Tmax=0.746 AbsCorr = MULTI-SCAN

Data completeness= 0.997

Theta(max)= 26.000

R(reflections)= 0.0538( 5736)

wR2(reflections)= 0.1542( 7568)

S = 1.026

Npar= 518

X-ray data of structure 4dh (CCDC1983977)

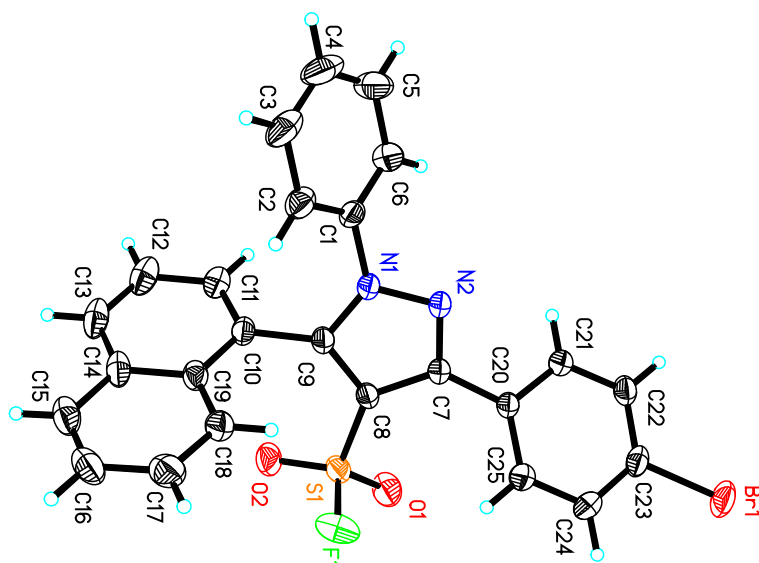

## Datablock: mo\_d8v19487\_0m

Bond precision: C-C = 0.0043 Å Wavelength=0.71073

Cell: a=10.0429(4) b=10.1977(5) c=11.6072(5)  
 alpha=96.715(2) beta=111.783(1) gamma=91.036(2)

Temperature: 293 K

|                        | Calculated                                                           | Reported                                                             |
|------------------------|----------------------------------------------------------------------|----------------------------------------------------------------------|
| Volume                 | 1093.85(8)                                                           | 1093.85(8)                                                           |
| Space group            | P -1                                                                 | P -1                                                                 |
| Hall group             | -P 1                                                                 | -P 1                                                                 |
| Moiety formula         | C <sub>25</sub> H <sub>16</sub> Br F N <sub>2</sub> O <sub>2</sub> S | ?                                                                    |
| Sum formula            | C <sub>25</sub> H <sub>16</sub> Br F N <sub>2</sub> O <sub>2</sub> S | C <sub>25</sub> H <sub>16</sub> Br F N <sub>2</sub> O <sub>2</sub> S |
| Mr                     | 507.36                                                               | 507.37                                                               |
| Dx, g cm <sup>-3</sup> | 1.540                                                                | 1.540                                                                |
| Z                      | 2                                                                    | 2                                                                    |
| Mu (mm <sup>-1</sup> ) | 2.009                                                                | 2.009                                                                |
| F <sub>000</sub>       | 512.0                                                                | 512.0                                                                |
| F <sub>000</sub> '     | 511.88                                                               |                                                                      |
| h,k,lmax               | 12,12,14                                                             | 12,12,14                                                             |
| Nref                   | 4297                                                                 | 4254                                                                 |
| Tmin,Tmax              | 0.732,0.818                                                          | 0.587,0.746                                                          |
| Tmin'                  | 0.718                                                                |                                                                      |

Correction method= # Reported T Limits: Tmin=0.587 Tmax=0.746 AbsCorr = MULTI-SCAN

Data completeness= 0.990

Theta(max)= 25.999

R(reflections)= 0.0363( 3279)

wR2(reflections)= 0.0951( 4254)

S = 1.026

Npar= 290

X-ray data of structure 4en (CCDC1983974)

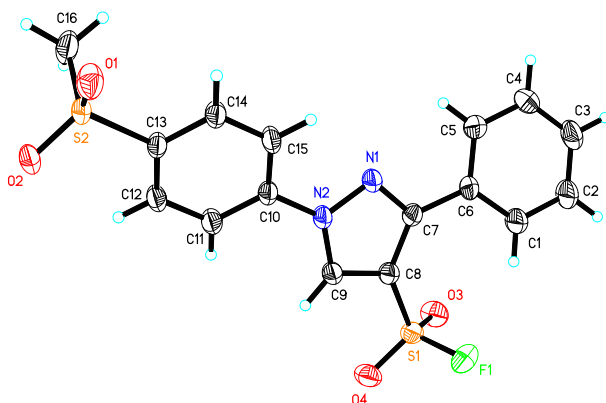

## Datablock: mo\_d8v19490\_0m

Bond precision: C-C = 0.0052 Å Wavelength=0.71073  
 Cell: a=4.9232(4) b=10.7857(9) c=15.7702(14)  
 alpha=91.102(3) beta=95.522(3) gamma=93.169(3)  
 Temperature: 293 K

|                        | Calculated         | Reported           |
|------------------------|--------------------|--------------------|
| Volume                 | 831.99(12)         | 831.99(12)         |
| Space group            | P -1               | P -1               |
| Hall group             | -P 1               | -P 1               |
| Moiety formula         | C16 H13 F N2 O4 S2 | ?                  |
| Sum formula            | C16 H13 F N2 O4 S2 | C16 H13 F N2 O4 S2 |
| Mr                     | 380.40             | 380.40             |
| Dx, g cm <sup>-3</sup> | 1.518              | 1.518              |
| Z                      | 2                  | 2                  |
| Mu (mm <sup>-1</sup> ) | 0.355              | 0.355              |
| F000                   | 392.0              | 392.0              |
| F000'                  | 392.69             |                    |
| h,k,lmax               | 5,13,19            | 5,13,19            |
| Nref                   | 3079               | 3057               |
| Tmin,Tmax              | 0.950,0.975        | 0.617,0.746        |
| Tmin'                  | 0.931              |                    |

Correction method= # Reported T Limits: Tmin=0.617 Tmax=0.746 AbsCorr = MULTI-SCAN

Data completeness= 0.993 Theta(max)= 25.499  
 R(reflections)= 0.0573( 2480) wR2(reflections)= 0.1739( 3057)  
 S = 1.091 Npar= 227



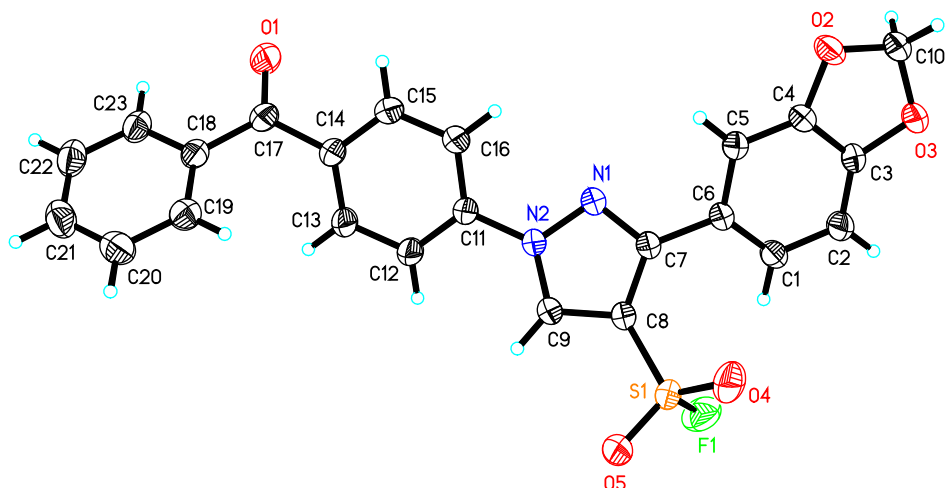

## Datablock: mo\_d8v19489\_0m

Bond precision: C-C = 0.0033 Å Wavelength=0.71073  
 Cell: a=12.2503(8) b=12.4284(10) c=14.2741(11)  
 alpha=90 beta=110.834(2) gamma=90

Temperature: 293 K

|                        | Calculated        | Reported          |
|------------------------|-------------------|-------------------|
| Volume                 | 2031.2(3)         | 2031.2(3)         |
| Space group            | P 21/n            | P 21/n            |
| Hall group             | -P 2yn            | -P 2yn            |
| Moiety formula         | C23 H15 F N2 O5 S | ?                 |
| Sum formula            | C23 H15 F N2 O5 S | C23 H15 F N2 O5 S |
| Mr                     | 450.43            | 450.43            |
| Dx, g cm <sup>-3</sup> | 1.473             | 1.473             |
| Z                      | 4                 | 4                 |
| Mu (mm <sup>-1</sup> ) | 0.209             | 0.209             |
| F000                   | 928.0             | 928.0             |
| F000'                  | 929.00            |                   |
| h,k,lmax               | 15,15,17          | 15,15,17          |
| Nref                   | 3991              | 3984              |
| Tmin,Tmax              | 0.961,0.973       | 0.598,0.746       |
| Tmin'                  | 0.959             |                   |

Correction method= # Reported T Limits: Tmin=0.598 Tmax=0.746 AbsCorr = MULTI-SCAN

Data completeness= 0.998

Theta(max)= 25.999

R(reflections)= 0.0429( 2951)

wR2(reflections)= 0.1190( 3984)

S = 1.017

Npar= 290

X-ray data of structure 4fg (CCDC1983975)

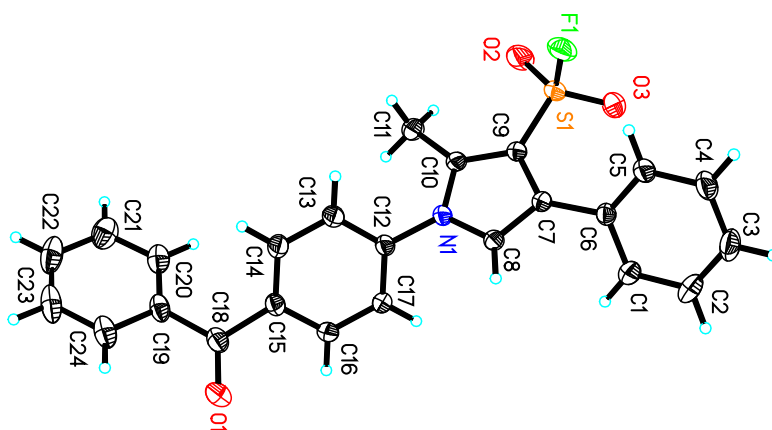

## Datablock: mo\_d8v19488\_0m

|                                                                                    |                                                          |                                                      |
|------------------------------------------------------------------------------------|----------------------------------------------------------|------------------------------------------------------|
| Bond precision:                                                                    | C-C = 0.0028 Å                                           | Wavelength=0.71073                                   |
| Cell:                                                                              | a=7.8823(2)      b=10.9580(3)      c=12.2338(3)          |                                                      |
|                                                                                    | alpha=78.789(1)      beta=76.764(1)      gamma=83.985(1) |                                                      |
| Temperature:                                                                       | 293 K                                                    |                                                      |
|                                                                                    | Calculated                                               | Reported                                             |
| Volume                                                                             | 1006.97(5)                                               | 1006.97(5)                                           |
| Space group                                                                        | P -1                                                     | P -1                                                 |
| Hall group                                                                         | -P 1                                                     | -P 1                                                 |
| Moiety formula                                                                     | C <sub>24</sub> H <sub>18</sub> F N O <sub>3</sub> S     | ?                                                    |
| Sum formula                                                                        | C <sub>24</sub> H <sub>18</sub> F N O <sub>3</sub> S     | C <sub>24</sub> H <sub>18</sub> F N O <sub>3</sub> S |
| Mr                                                                                 | 419.45                                                   | 419.45                                               |
| Dx, g cm <sup>-3</sup>                                                             | 1.383                                                    | 1.383                                                |
| Z                                                                                  | 2                                                        | 2                                                    |
| Mu (mm <sup>-1</sup> )                                                             | 0.196                                                    | 0.196                                                |
| F <sub>000</sub>                                                                   | 436.0                                                    | 436.0                                                |
| F <sub>000</sub> '                                                                 | 436.46                                                   |                                                      |
| h,k,lmax                                                                           | 9,13,15                                                  | 9,13,15                                              |
| Nref                                                                               | 3958                                                     | 3916                                                 |
| Tmin,Tmax                                                                          | 0.970,0.981                                              | 0.680,0.746                                          |
| Tmin'                                                                              | 0.969                                                    |                                                      |
| Correction method= # Reported T Limits: Tmin=0.680 Tmax=0.746 AbsCorr = MULTI-SCAN |                                                          |                                                      |
| Data completeness=                                                                 | 0.989                                                    | Theta(max)= 25.996                                   |
| R(reflections)=                                                                    | 0.0409( 3227)                                            | wR2(reflections)= 0.1121( 3916)                      |
| S =                                                                                | 1.033                                                    | Npar= 273                                            |

X-ray data of structure 4ga (CCDC1983978)

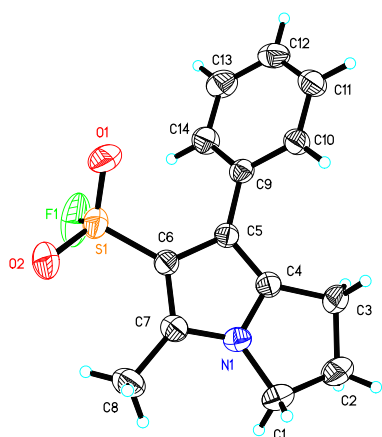

**Datablock: mo\_d8v191016\_0m**

Bond precision: C-C = 0.0038 Å Wavelength=0.71073  
 Cell: a=8.2800(5) b=16.9766(11) c=9.6583(6)  
 alpha=90 beta=101.364(2) gamma=90  
 Temperature: 293 K

|                        | Calculated       | Reported         |
|------------------------|------------------|------------------|
| Volume                 | 1331.02(14)      | 1331.01(14)      |
| Space group            | P 21/c           | P 21/c           |
| Hall group             | -P 2ybc          | -P 2ybc          |
| Moiety formula         | C14 H14 F N O2 S | ?                |
| Sum formula            | C14 H14 F N O2 S | C14 H14 F N O2 S |
| Mr                     | 279.32           | 279.32           |
| Dx, g cm <sup>-3</sup> | 1.394            | 1.394            |
| Z                      | 4                | 4                |
| Mu (mm <sup>-1</sup> ) | 0.252            | 0.252            |
| F000                   | 584.0            | 584.0            |
| F000'                  | 584.78           |                  |
| h,k,lmax               | 10,20,11         | 10,20,11         |
| Nref                   | 2603             | 2591             |
| Tmin,Tmax              | 0.956,0.973      | 0.674,0.746      |
| Tmin'                  | 0.956            |                  |

Correction method= # Reported T Limits: Tmin=0.674 Tmax=0.746 AbsCorr = MULTI-SCAN

Data completeness= 0.995 Theta(max)= 25.994  
 R(reflections)= 0.0500( 2013) wR2(reflections)= 0.1484( 2591)  
 S = 1.064 Npar= 173

**X-ray data of structure 4hb (CCDC1983963)**

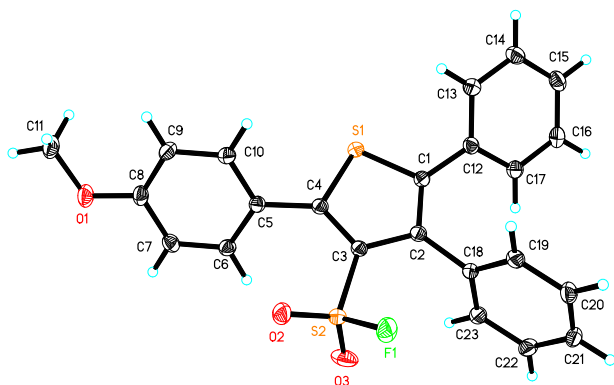

**Datablock: d8v191004**

|                                                                                    |                                 |                    |              |
|------------------------------------------------------------------------------------|---------------------------------|--------------------|--------------|
| Bond precision:                                                                    | C-C = 0.0025 Å                  | Wavelength=0.71073 |              |
| Cell:                                                                              | a=14.8154(7)                    | b=12.1306(6)       | c=12.0053(6) |
|                                                                                    | alpha=90                        | beta=113.789(1)    | gamma=90     |
| Temperature: 193 K                                                                 |                                 |                    |              |
|                                                                                    | Calculated                      | Reported           |              |
| Volume                                                                             | 1974.27(17)                     | 1974.27(17)        |              |
| Space group                                                                        | P 21/c                          | P 21/c             |              |
| Hall group                                                                         | -P 2ybc                         | -P 2ybc            |              |
| Moiety formula                                                                     | C23 H17 F O3 S2                 | ?                  |              |
| Sum formula                                                                        | C23 H17 F O3 S2                 | C23 H17 F O3 S2    |              |
| Mr                                                                                 | 424.49                          | 424.48             |              |
| Dx,g cm <sup>-3</sup>                                                              | 1.428                           | 1.428              |              |
| Z                                                                                  | 4                               | 4                  |              |
| Mu (mm <sup>-1</sup> )                                                             | 0.302                           | 0.301              |              |
| F000                                                                               | 880.0                           | 880.0              |              |
| F000'                                                                              | 881.41                          |                    |              |
| h,k,lmax                                                                           | 18,14,14                        | 18,14,14           |              |
| Nref                                                                               | 3883                            | 3877               |              |
| Tmin,Tmax                                                                          | 0.947,0.965                     | 0.646,0.746        |              |
| Tmin'                                                                              | 0.947                           |                    |              |
| Correction method= # Reported T Limits: Tmin=0.646 Tmax=0.746 AbsCorr = MULTI-SCAN |                                 |                    |              |
| Data completeness= 0.998                                                           | Theta(max)= 25.997              |                    |              |
| R(reflections)= 0.0332( 3449)                                                      | wR2(reflections)= 0.0835( 3877) |                    |              |
| S = 1.060                                                                          | Npar= 263                       |                    |              |
| <b>X-ray data of structure 4ka (CCDC1983965)</b>                                   |                                 |                    |              |

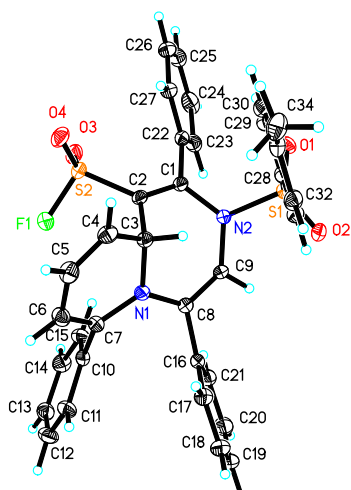

**Datablock: mo\_d8v191009\_0m**

|                                                                                    |                                 |                    |
|------------------------------------------------------------------------------------|---------------------------------|--------------------|
| Bond precision:                                                                    | C-C = 0.0031 Å                  | Wavelength=0.71073 |
| Cell:                                                                              | a=9.3192(2)                     | b=29.3986(8)       |
|                                                                                    | alpha=90                        | beta=102.820(1)    |
|                                                                                    |                                 | c=10.7679(3)       |
|                                                                                    |                                 | gamma=90           |
| Temperature: 193 K                                                                 |                                 |                    |
|                                                                                    | Calculated                      | Reported           |
| Volume                                                                             | 2876.56(13)                     | 2876.56(13)        |
| Space group                                                                        | P 21/n                          | P 21/n             |
| Hall group                                                                         | -P 2yn                          | -P 2yn             |
| Moiety formula                                                                     | C34 H27 F N2 O4 S2              | ?                  |
| Sum formula                                                                        | C34 H27 F N2 O4 S2              | C34 H27 F N2 O4 S2 |
| Mr                                                                                 | 610.70                          | 610.69             |
| Dx, g cm <sup>-3</sup>                                                             | 1.410                           | 1.410              |
| Z                                                                                  | 4                               | 4                  |
| Mu (mm <sup>-1</sup> )                                                             | 0.235                           | 0.235              |
| F000                                                                               | 1272.0                          | 1272.0             |
| F000'                                                                              | 1273.56                         |                    |
| h,k,lmax                                                                           | 11,36,13                        | 11,36,13           |
| Nref                                                                               | 5654                            | 5621               |
| Tmin,Tmax                                                                          | 0.959,0.970                     | 0.673,0.746        |
| Tmin'                                                                              | 0.959                           |                    |
| Correction method= # Reported T Limits: Tmin=0.673 Tmax=0.746 AbsCorr = MULTI-SCAN |                                 |                    |
| Data completeness= 0.994                                                           | Theta(max)= 26.000              |                    |
| R(reflections)= 0.0405( 4618)                                                      | wR2(reflections)= 0.1024( 5621) |                    |
| S = 1.027                                                                          | Npar= 390                       |                    |
| <b>X-ray data of structure 4lg (CCDC1983966)</b>                                   |                                 |                    |

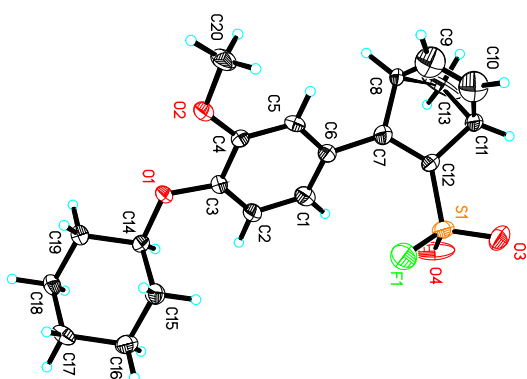

**Datablock: d8v191012**

Bond precision: C-C = 0.0109 Å Wavelength=0.71073  
 Cell: a=13.6756(6) b=14.5111(6) c=9.2765(4)  
 alpha=90 beta=98.364(1) gamma=90

Temperature: 193 K

|                                     | Calculated                                         | Reported                                           |
|-------------------------------------|----------------------------------------------------|----------------------------------------------------|
| Volume                              | 1821.32(14)                                        | 1821.32(14)                                        |
| Space group                         | P c                                                | P c                                                |
| Hall group                          | P -2yc                                             | P -2yc                                             |
| Moiety formula                      | C <sub>20</sub> H <sub>23</sub> F O <sub>4</sub> S | ?                                                  |
| Sum formula                         | C <sub>20</sub> H <sub>23</sub> F O <sub>4</sub> S | C <sub>20</sub> H <sub>23</sub> F O <sub>4</sub> S |
| Mr                                  | 378.44                                             | 378.44                                             |
| D <sub>x</sub> , g cm <sup>-3</sup> | 1.380                                              | 1.380                                              |
| Z                                   | 4                                                  | 4                                                  |
| Mu (mm <sup>-1</sup> )              | 0.210                                              | 0.210                                              |
| F <sub>000</sub>                    | 800.0                                              | 800.0                                              |
| F <sub>000</sub> <sup>l</sup>       | 800.92                                             |                                                    |
| h,k,l <sub>max</sub>                | 16,17,11                                           | 16,17,11                                           |
| N <sub>ref</sub>                    | 7163[ 3590]                                        | 7107                                               |
| T <sub>min</sub> ,T <sub>max</sub>  | 0.963,0.975                                        | 0.653,0.746                                        |
| T <sub>min</sub> <sup>l</sup>       | 0.963                                              |                                                    |

Correction method= # Reported T Limits: T<sub>min</sub>=0.653 T<sub>max</sub>=0.746 AbsCorr = MULTI-SCAN

Data completeness= 1.98/0.99

Theta(max)= 25.999

R(reflections)= 0.0532( 5726)

wR2(reflections)= 0.1322( 7107)

S = 1.028

Npar= 472

**X-ray data of structure 6l** (CCDC1983962)

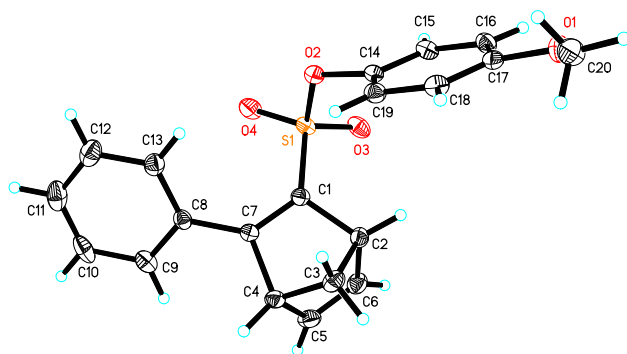

**Datablock: mo\_d8v191003\_0m**

Bond precision: C-C = 0.0048 Å Wavelength=0.71073  
 Cell: a=9.9964(4) b=7.9770(3) c=11.5581(5)  
 alpha=90 beta=113.947(1) gamma=90

Temperature: 193 K

|                        | Calculated   | Reported     |
|------------------------|--------------|--------------|
| Volume                 | 842.32(6)    | 842.32(6)    |
| Space group            | P 21         | P 21         |
| Hall group             | P 2yb        | P 2yb        |
| Moiety formula         | C20 H18 O4 S | ?            |
| Sum formula            | C20 H18 O4 S | C20 H18 O4 S |
| Mr                     | 354.40       | 354.40       |
| Dx, g cm <sup>-3</sup> | 1.397        | 1.397        |
| Z                      | 2            | 2            |
| Mu (mm <sup>-1</sup> ) | 0.214        | 0.214        |
| F000                   | 372.0        | 372.0        |
| F000'                  | 372.43       |              |
| h,k,lmax               | 12,9,14      | 12,9,14      |
| Nref                   | 3131[ 1687]  | 2942         |
| Tmin,Tmax              | 0.967,0.983  | 0.672,0.746  |
| Tmin'                  | 0.962        |              |

Correction method= # Reported T Limits: Tmin=0.672 Tmax=0.746 AbsCorr = MULTI-SCAN

Data completeness= 1.74/0.94

Theta(max)= 25.497

R(reflections)= 0.0317( 2758)

wR2(reflections)= 0.0718( 2942)

S = 1.070

Npar= 228

## Experimental procedure for SuFEx reactions performed in a 96 well plate format

### Method

Stock solutions of heterocyclic sulfonyl fluorides (**4eq**, **4ey**, **4ei**, **4hg**, **4hb**, **4al**, **4aq**, **4an**, **4aa**, **4ad**, **4dg**, **4df**, **4ce**, **4cn**, **4ch** and **4de**) (3.00  $\mu\text{mol}$ ), TBS ethers **5a-5f** (3.00  $\mu\text{mol}$ ) and DBU (600 nmol) in MeCN were added to a 96 well plate totalling a volume of 500  $\mu\text{L}$  in each well. The plate was agitated at 310 rpm at room temperature for 16 h and 150  $\mu\text{L}$  aliquots were taken from the reaction mixture and analyzed by LCMS (70-90 %  $\text{CH}_3\text{CN}/\text{water}$  15.9 min) or TLC.

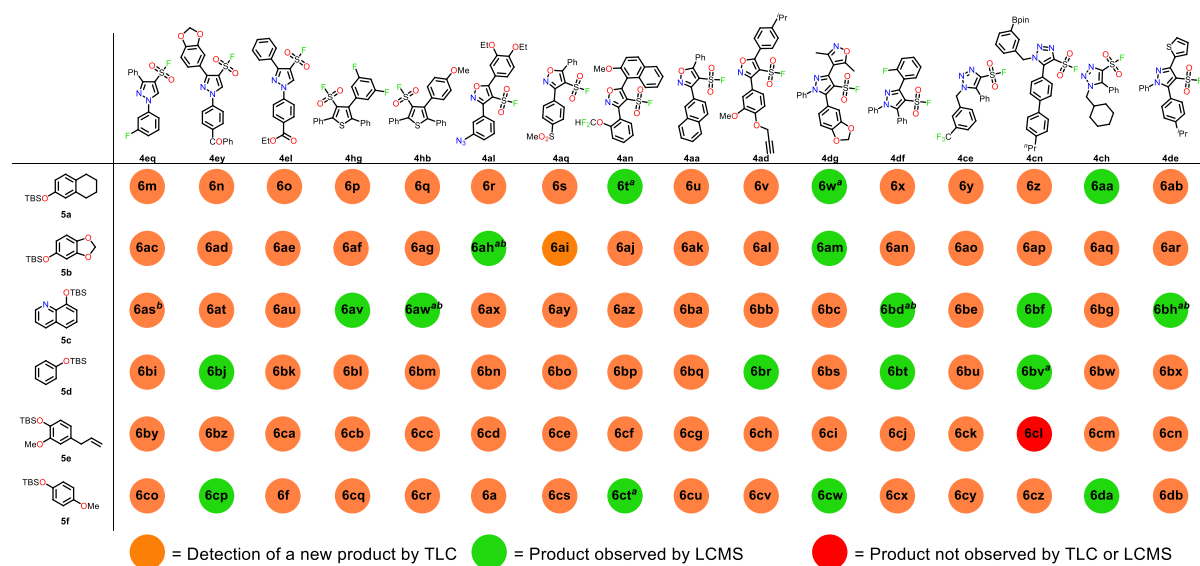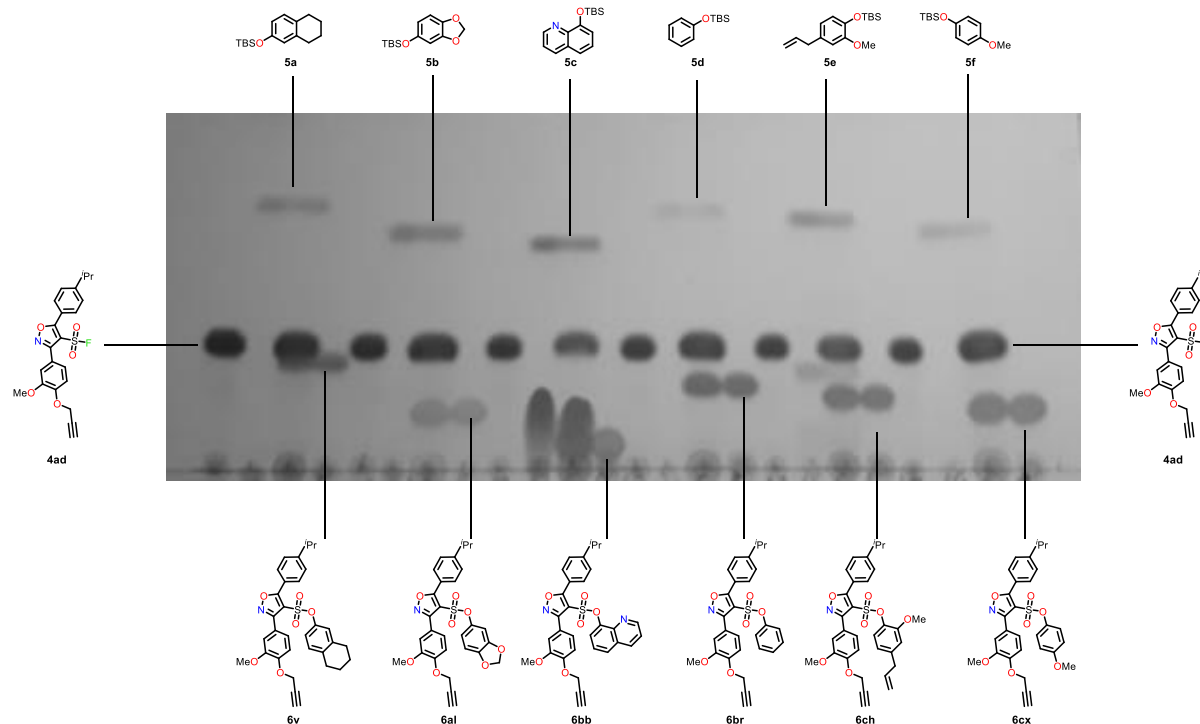

**Figure S3.** Representative TLC of SuFEx reactions performed in a 96 well plate format, Eluent: 15% EtOAc in petroleum ether



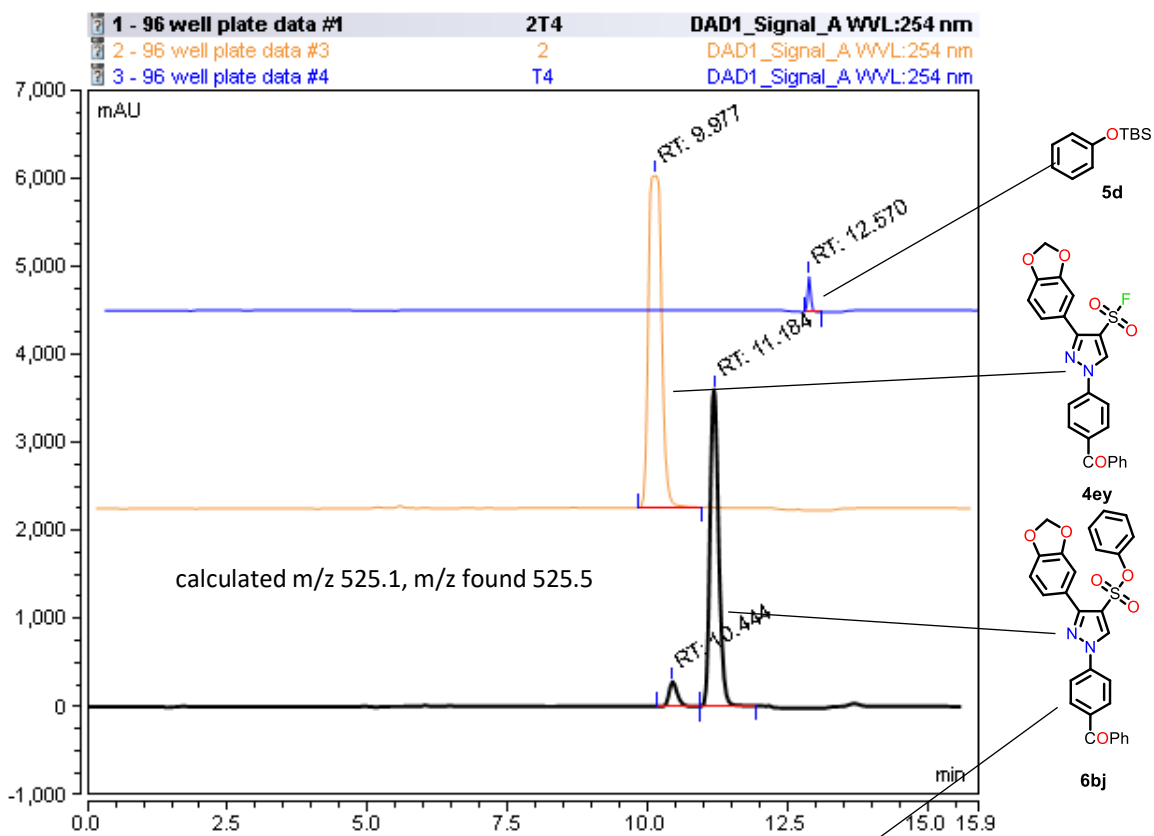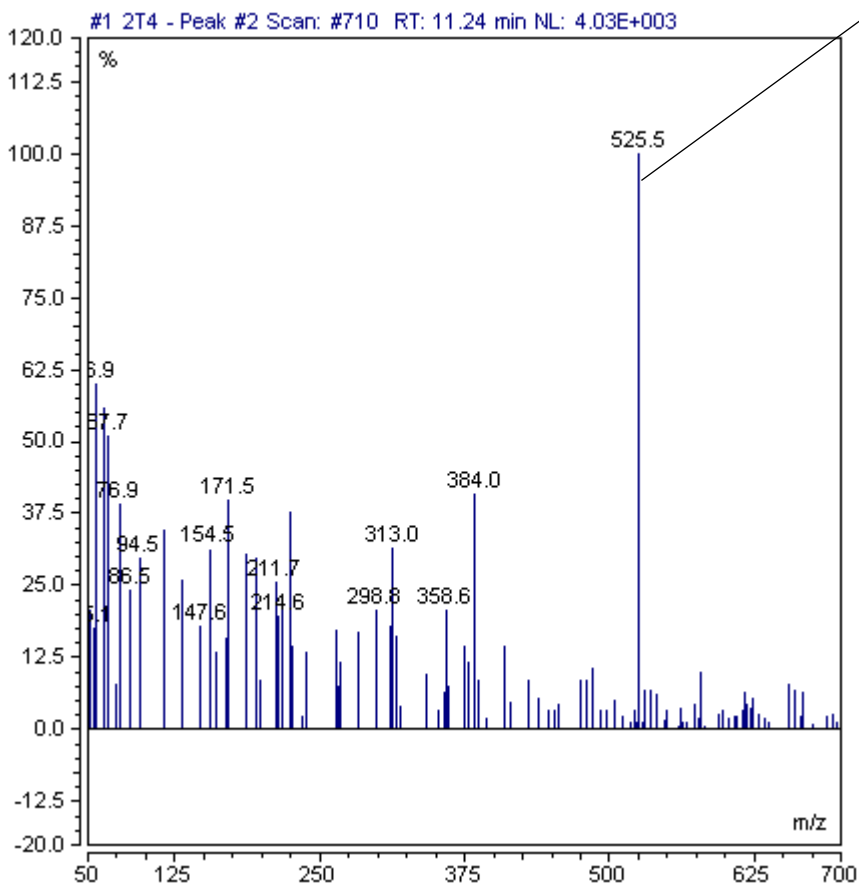

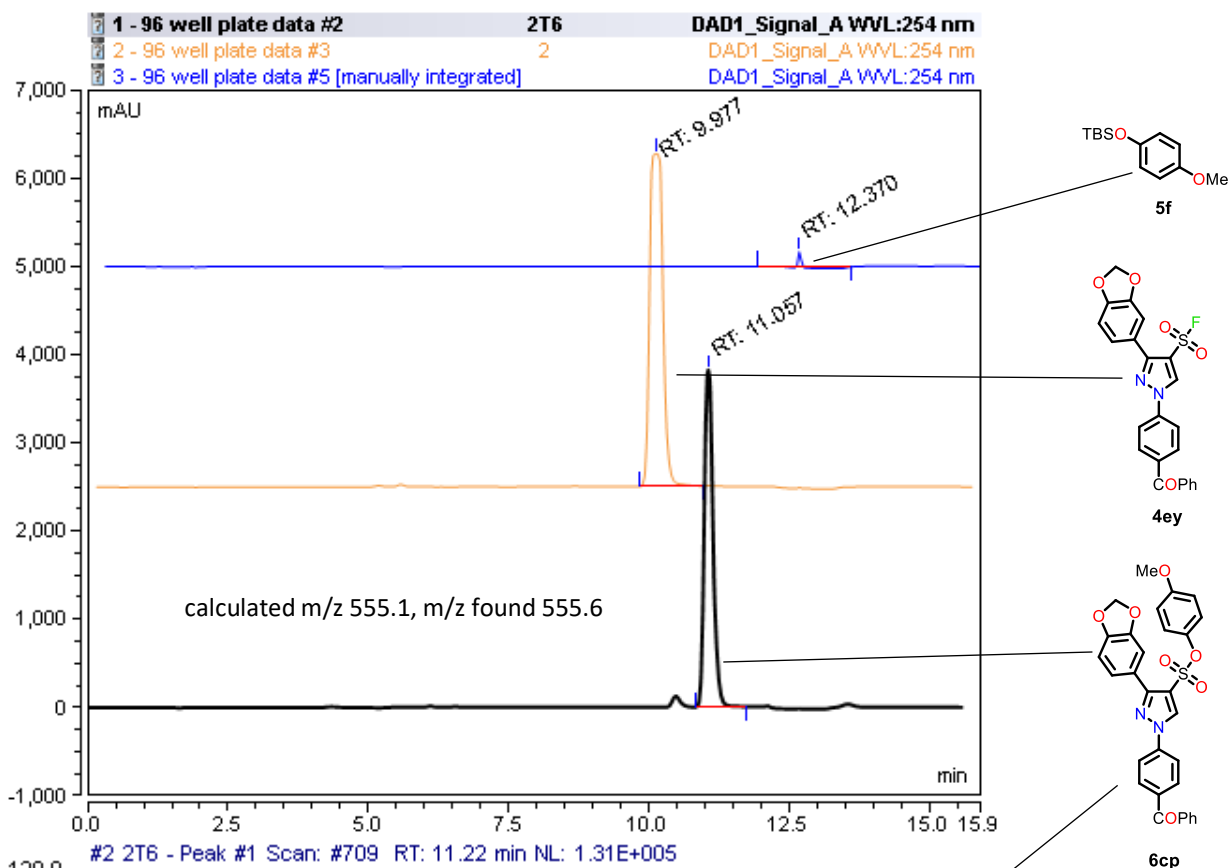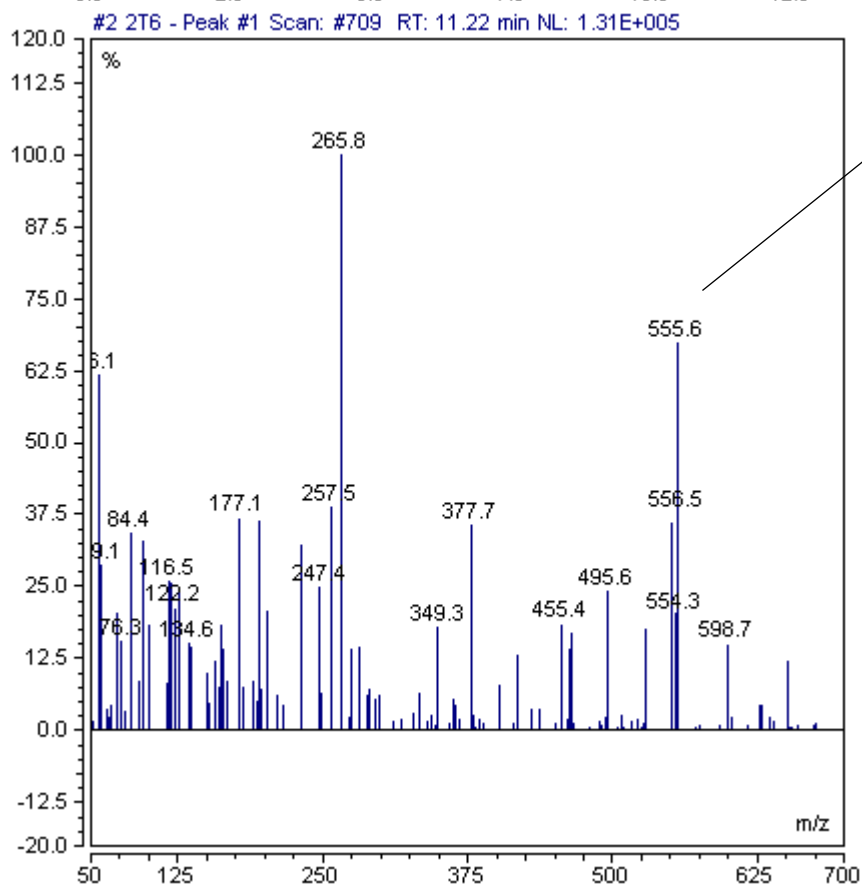

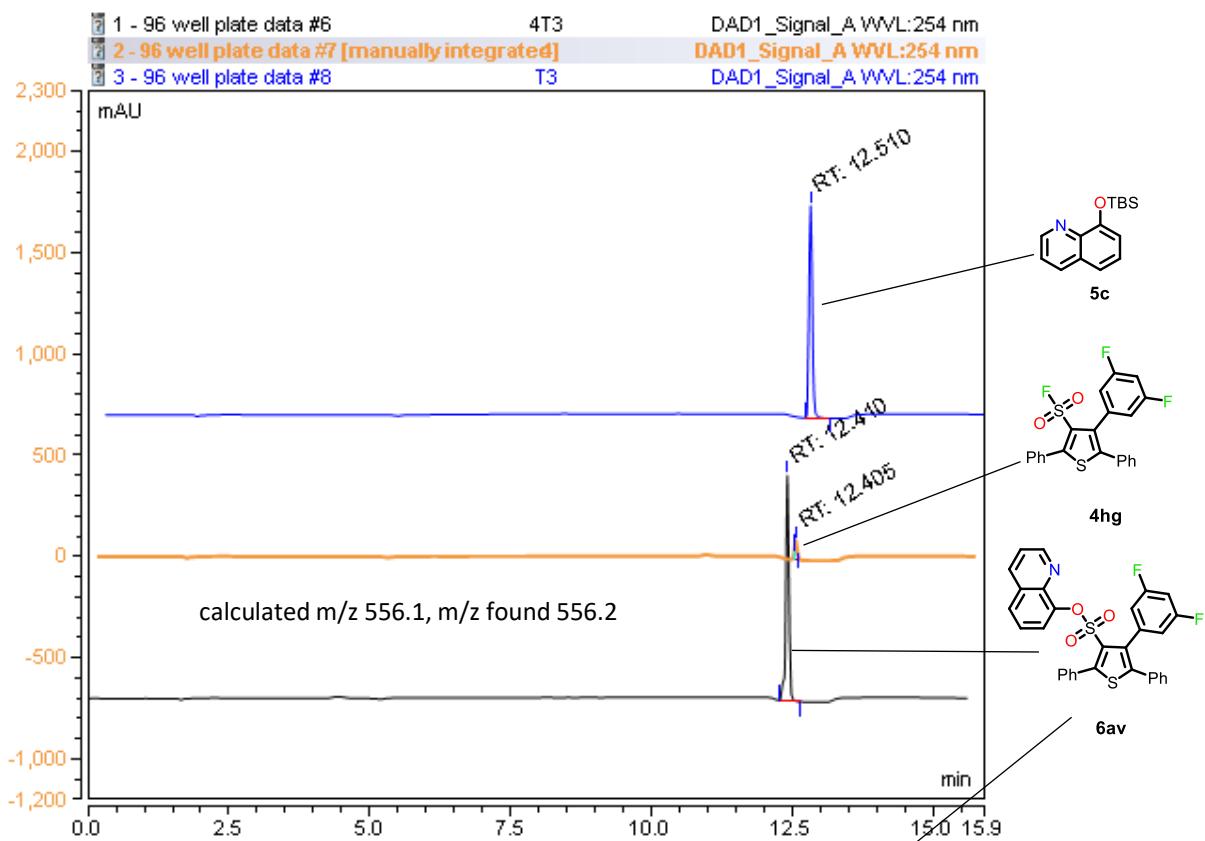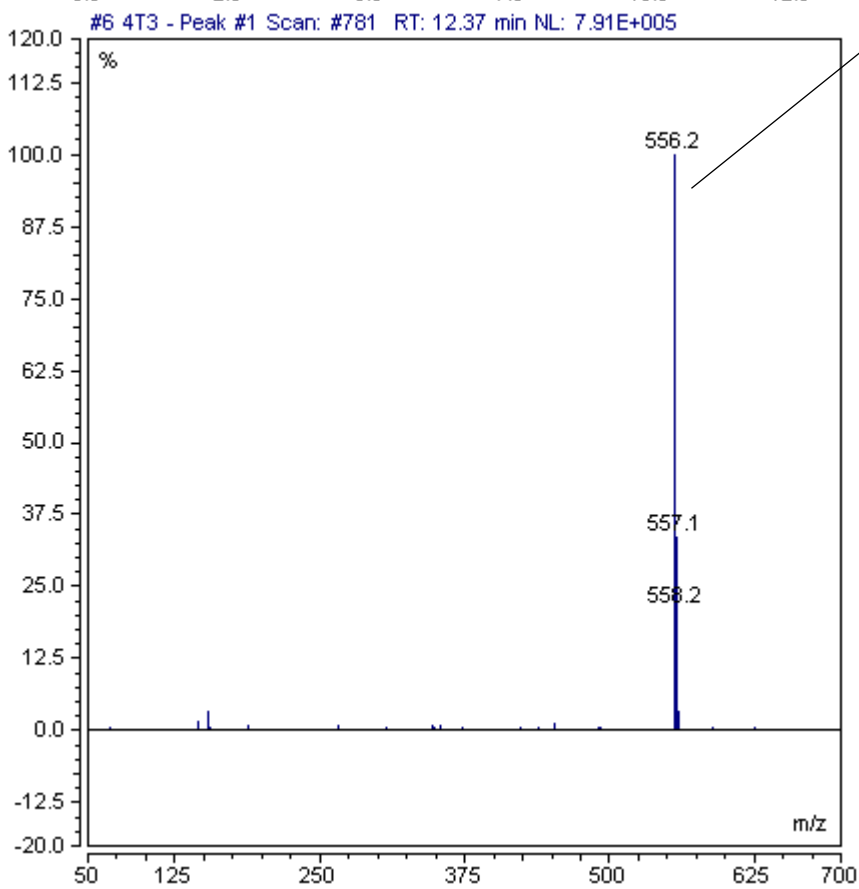

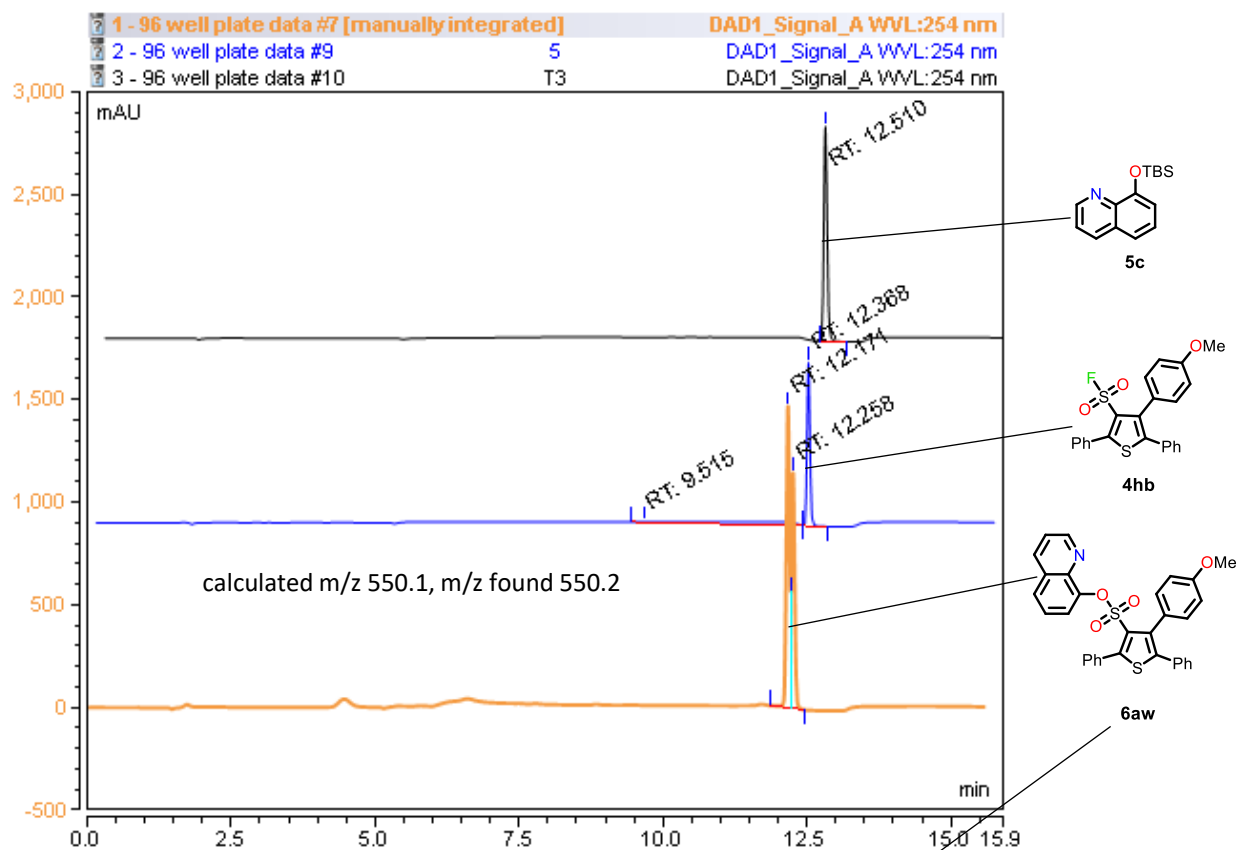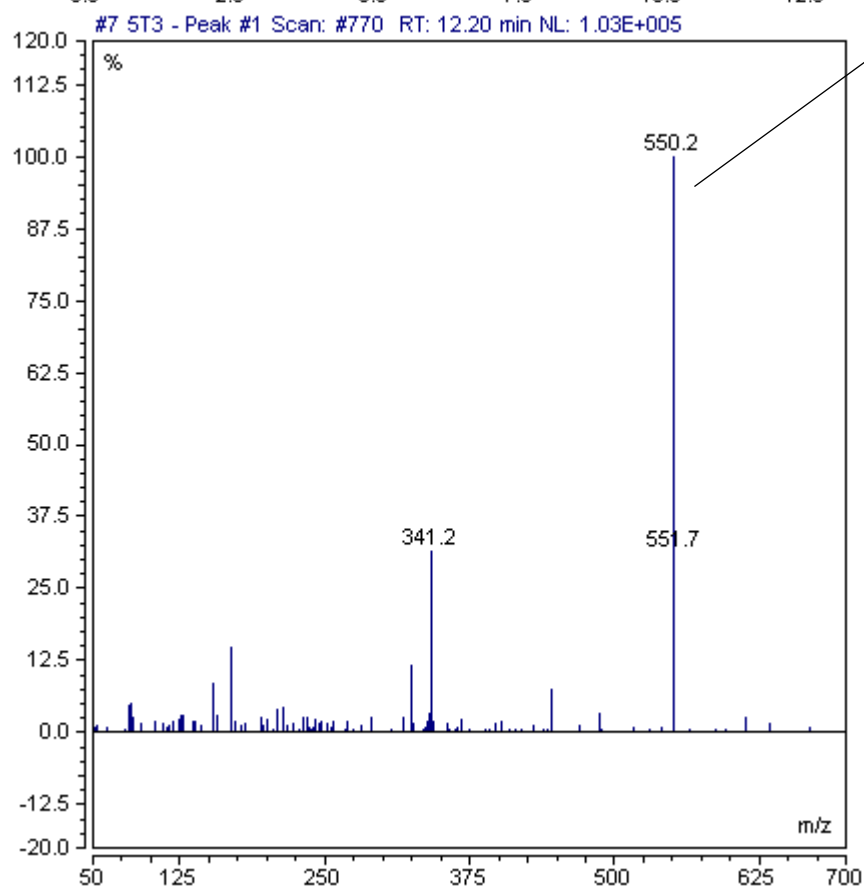

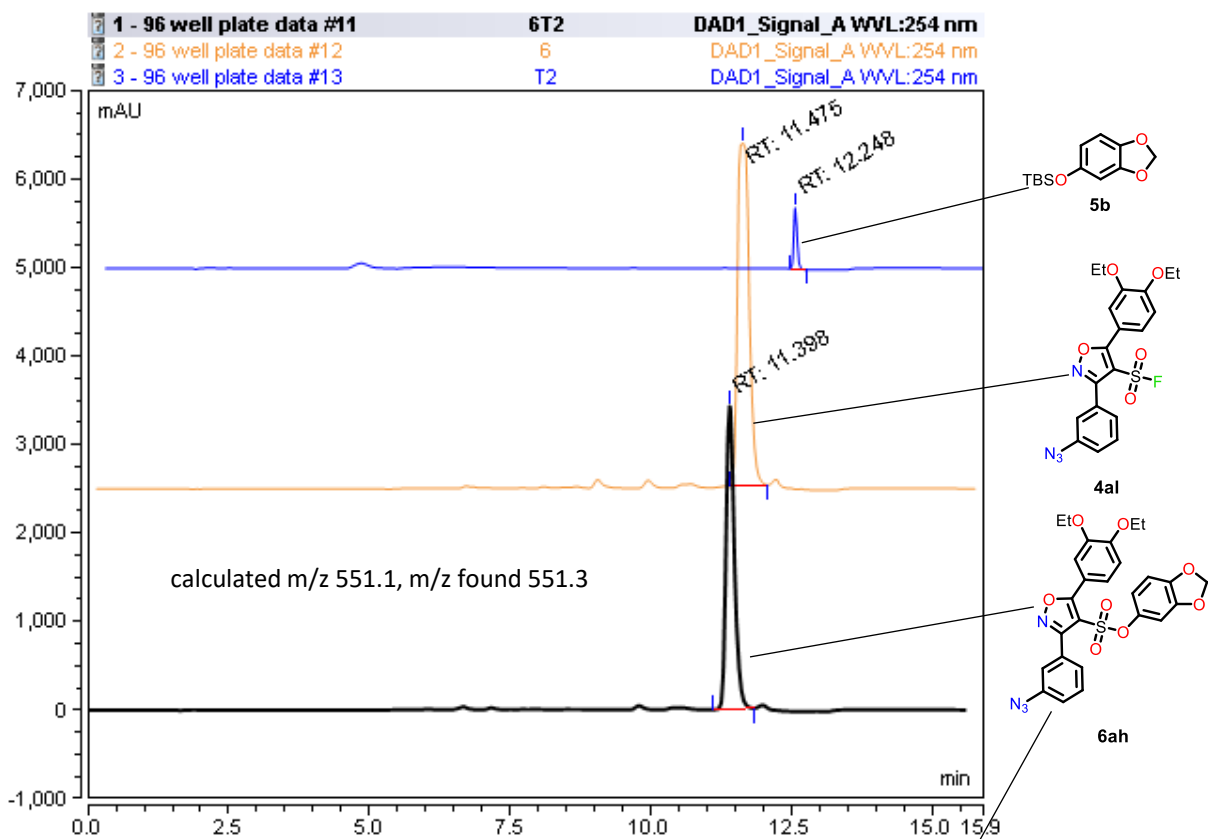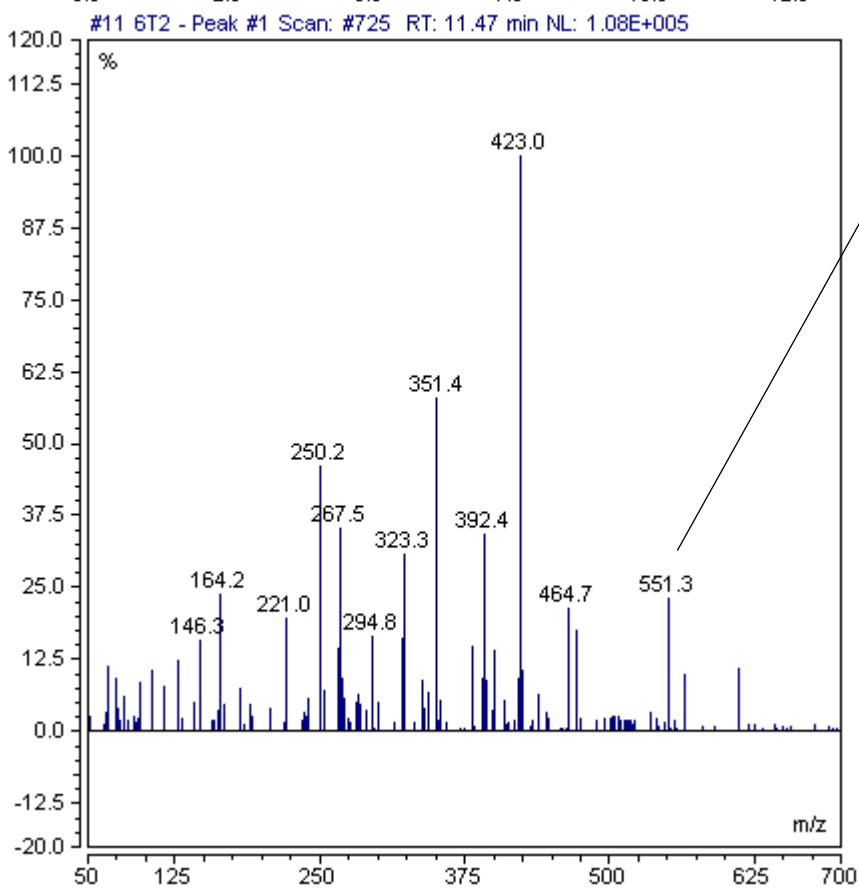

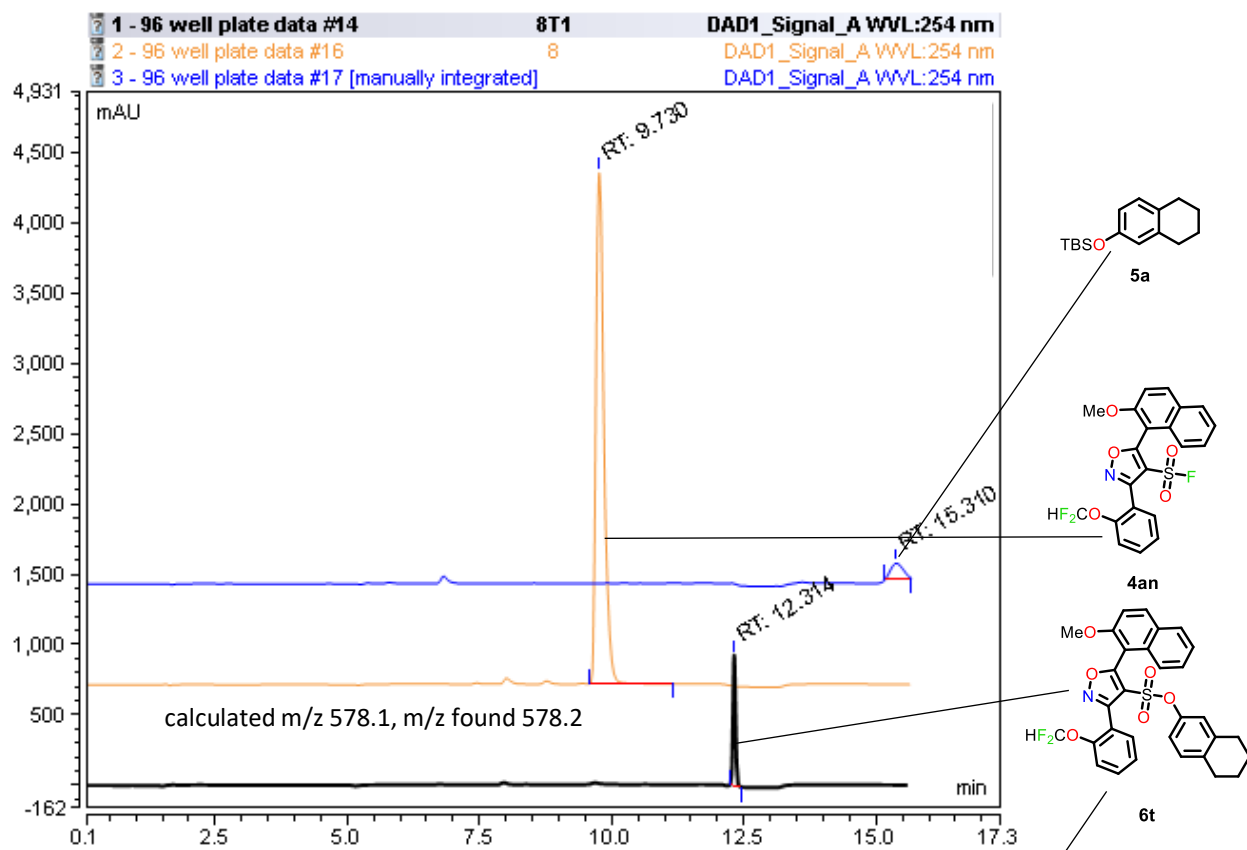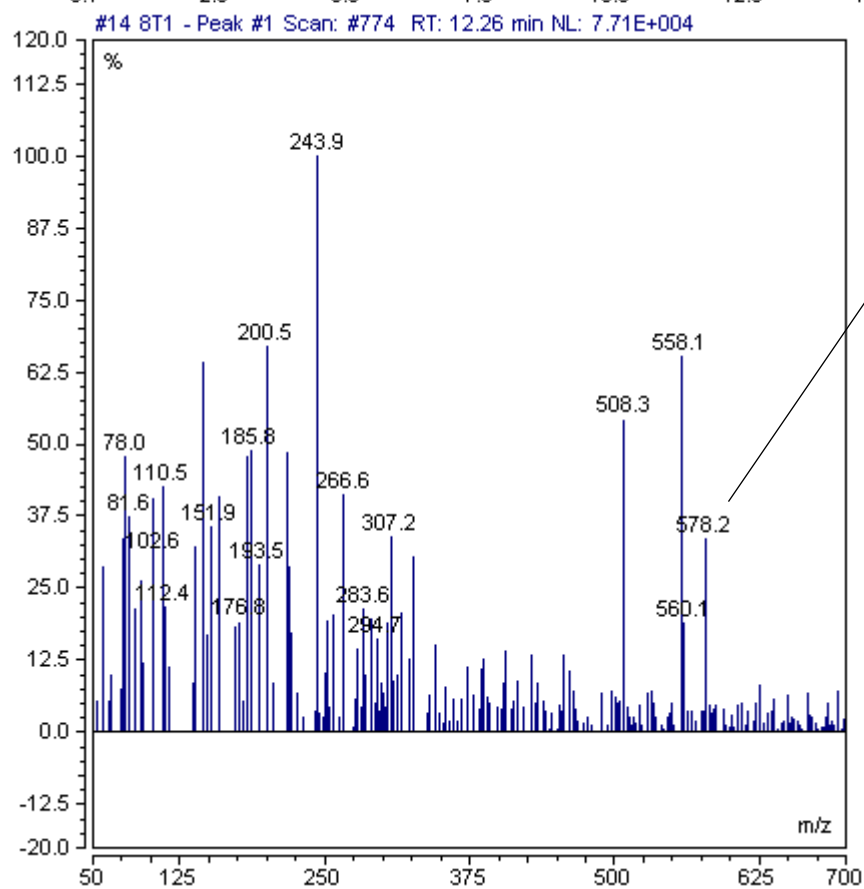

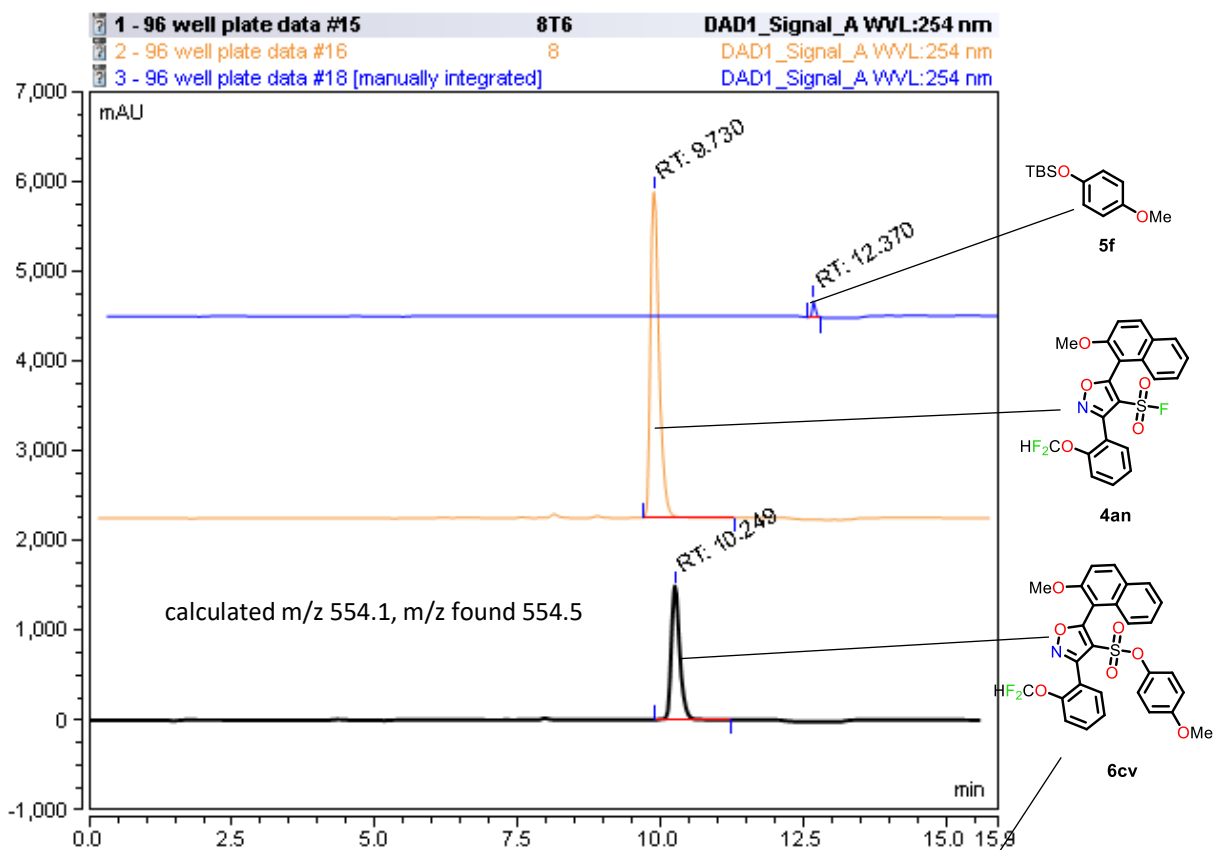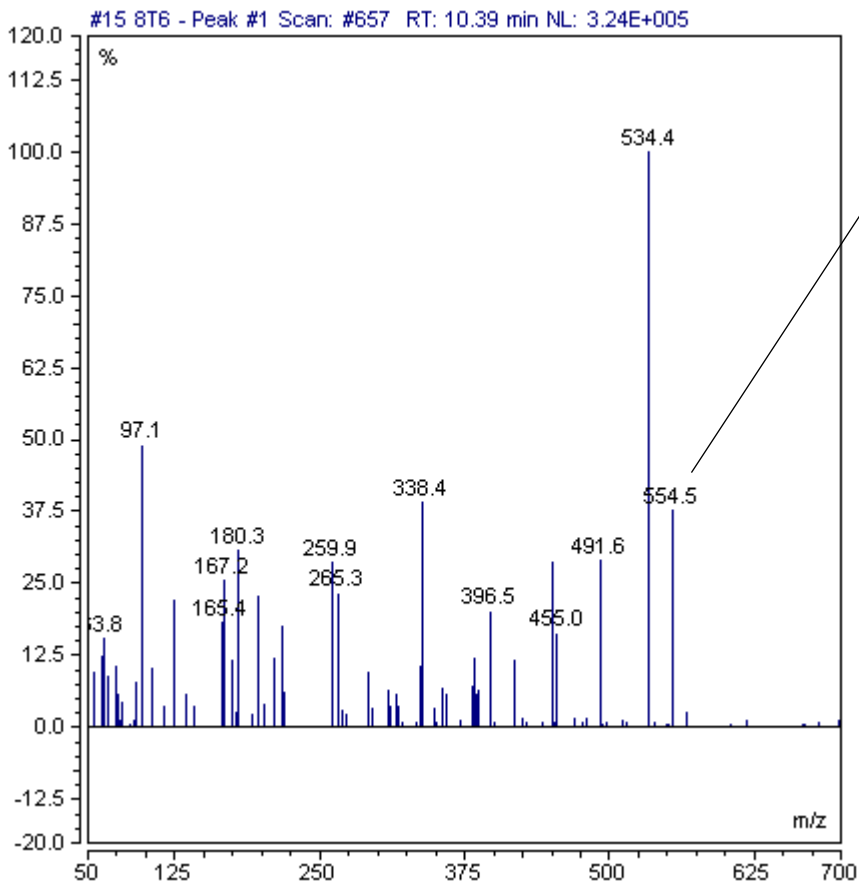

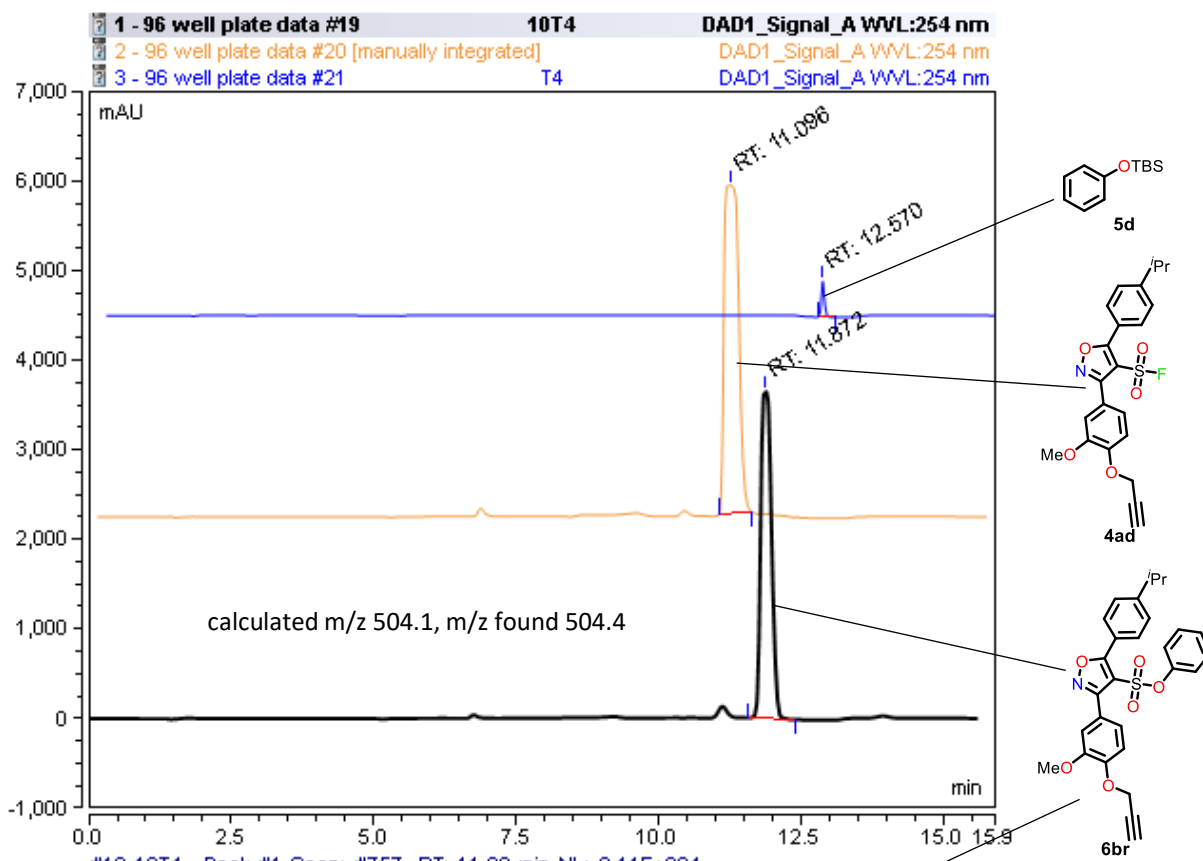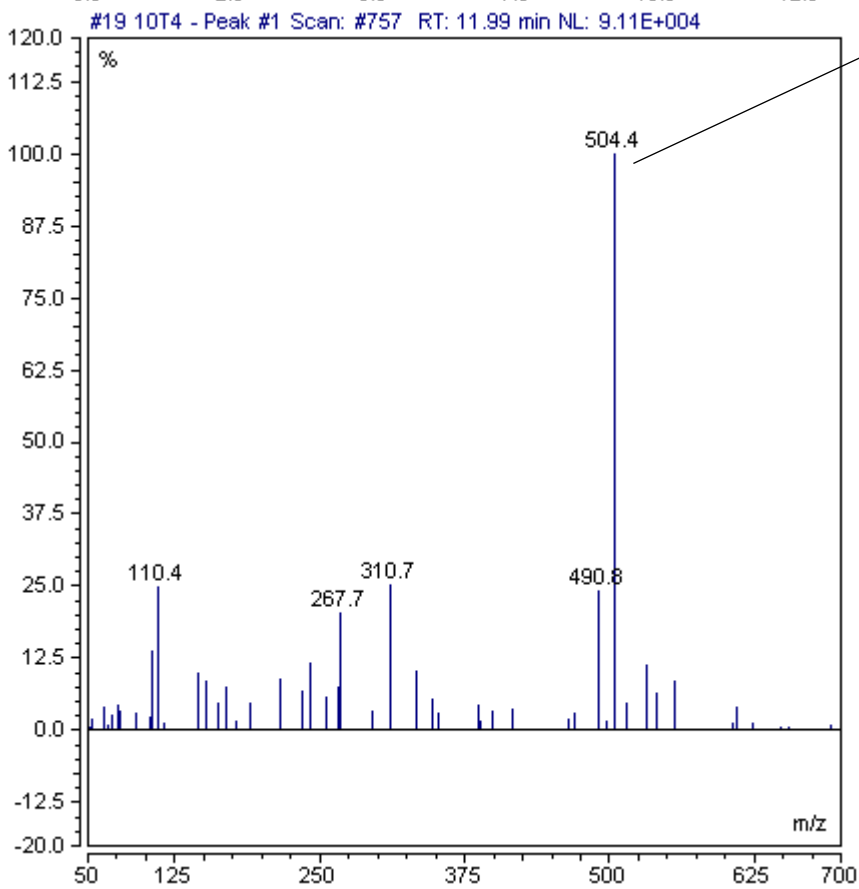



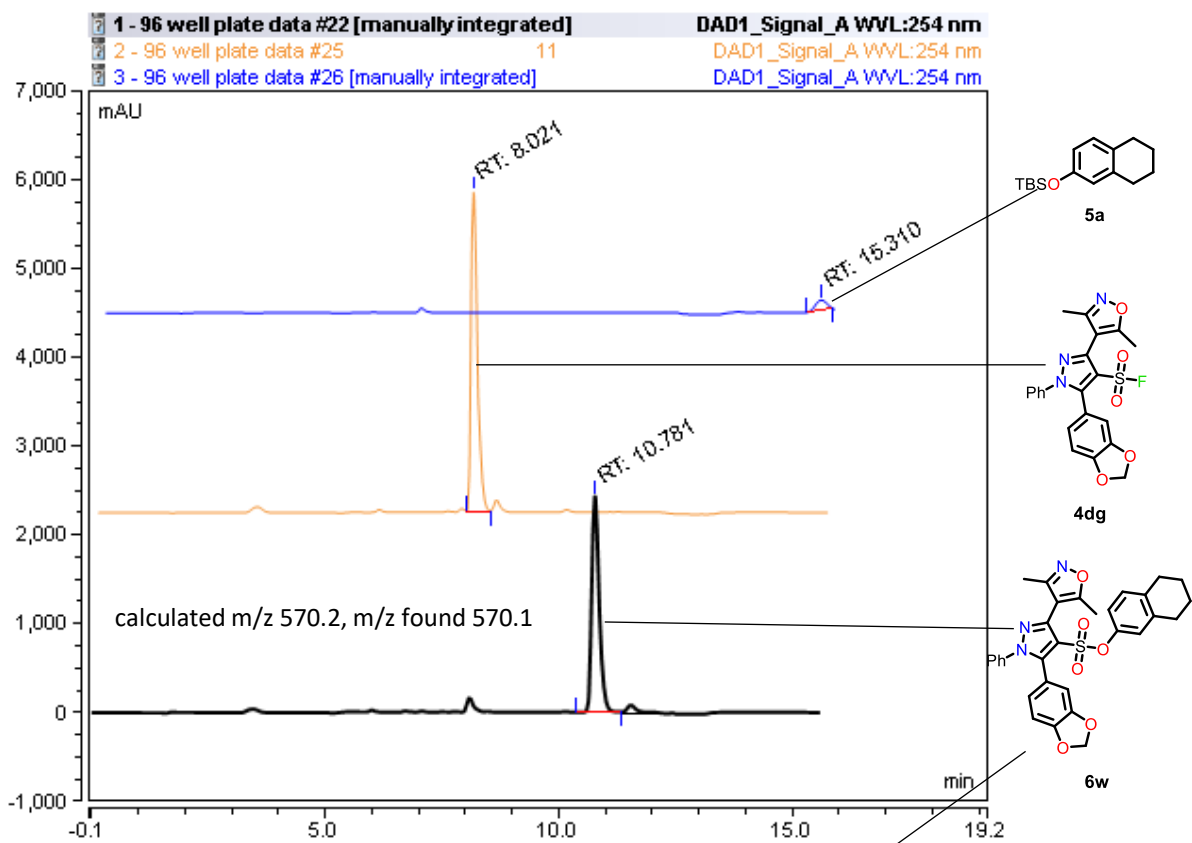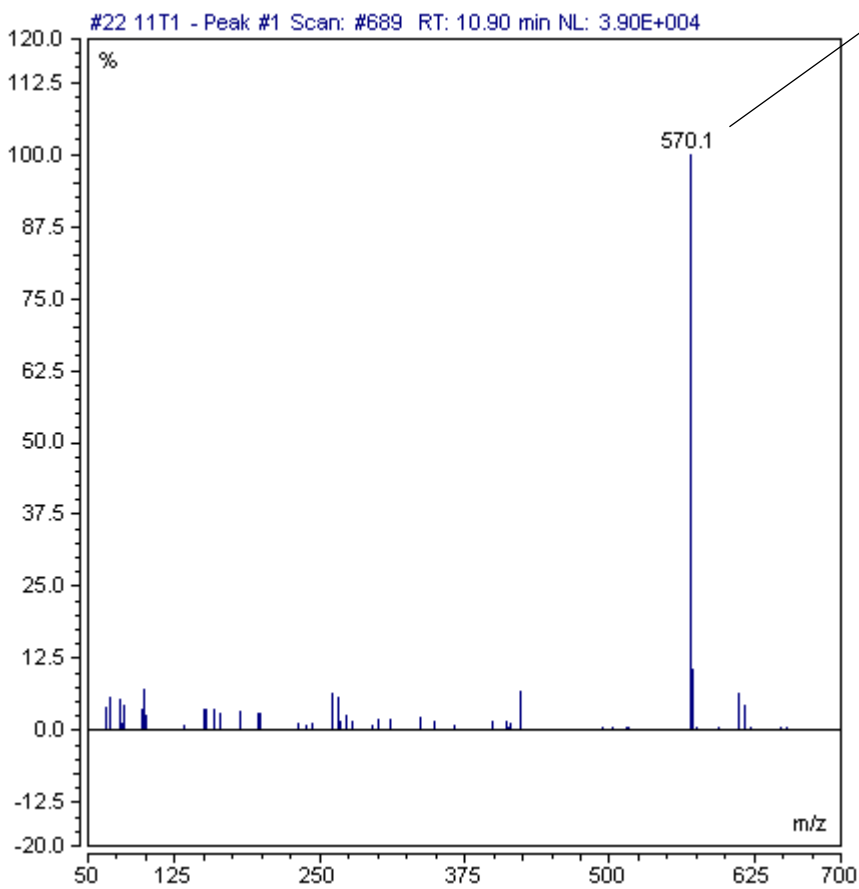

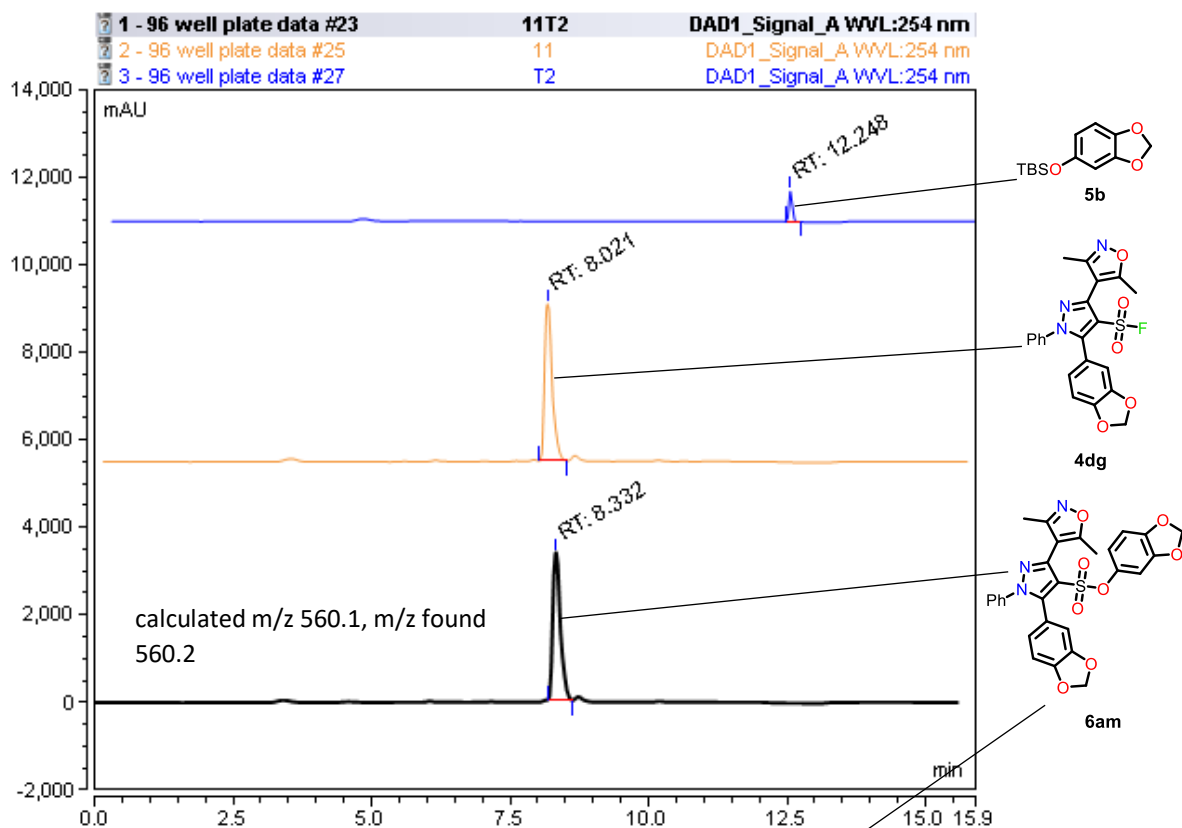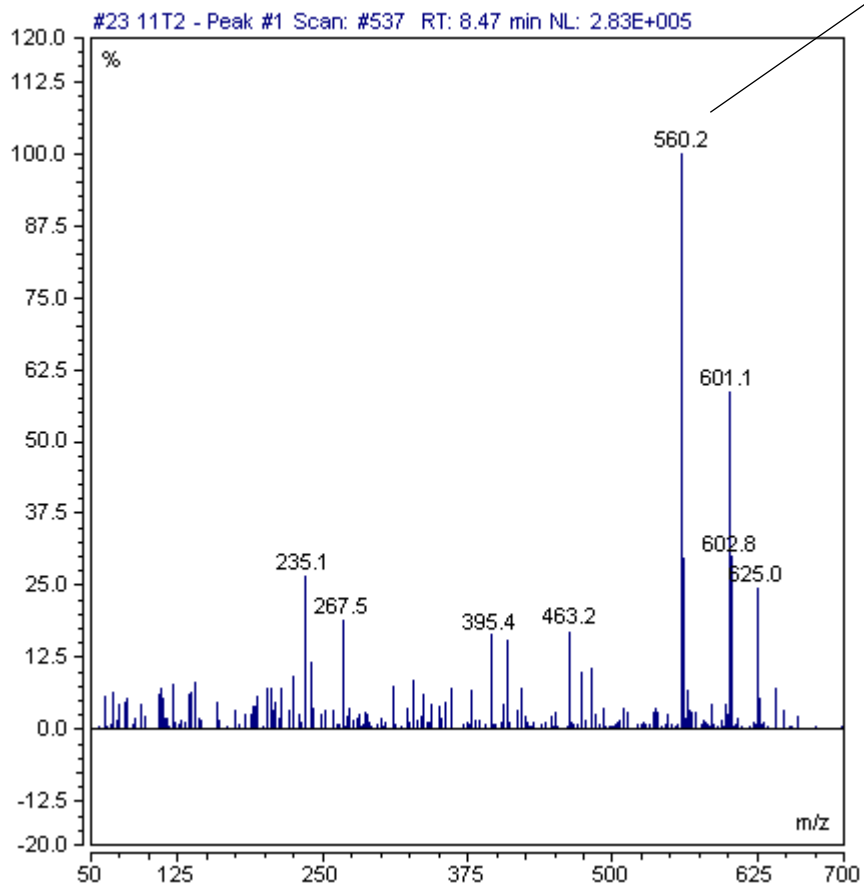

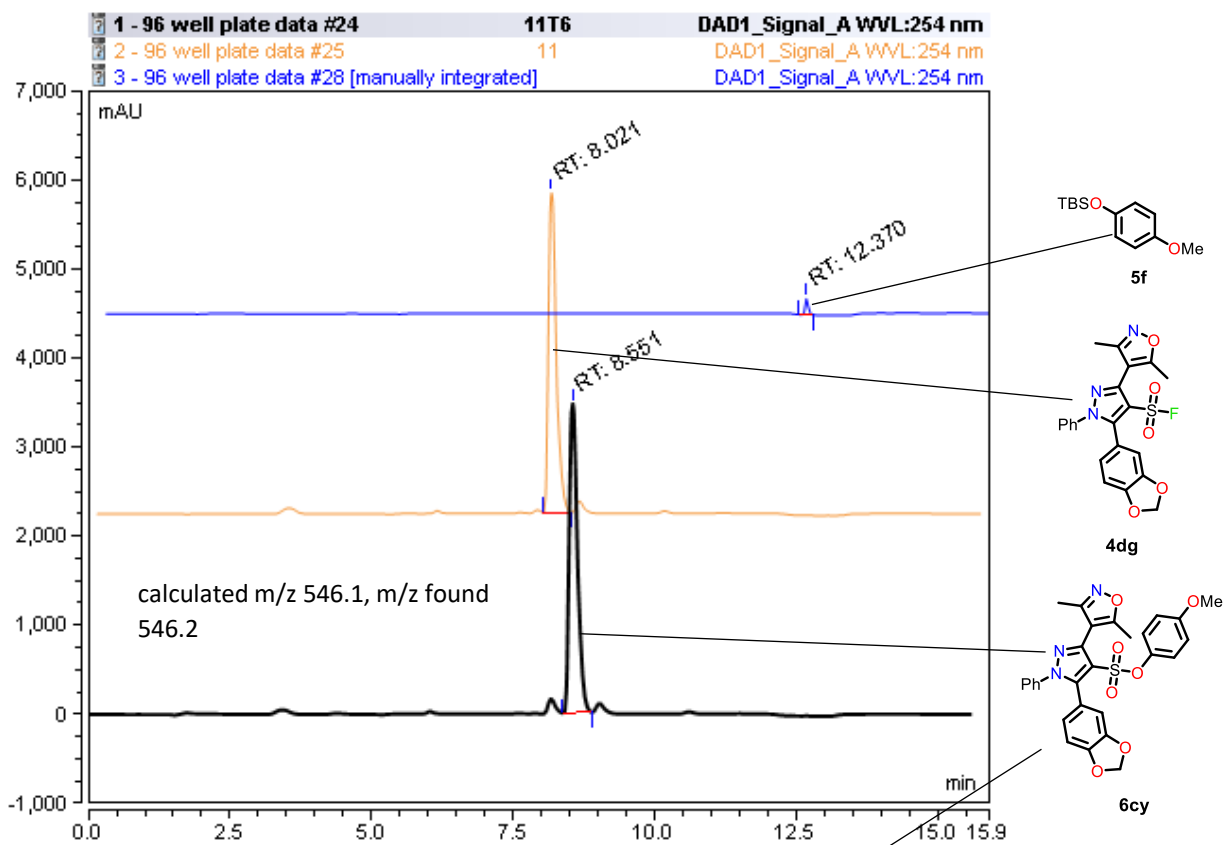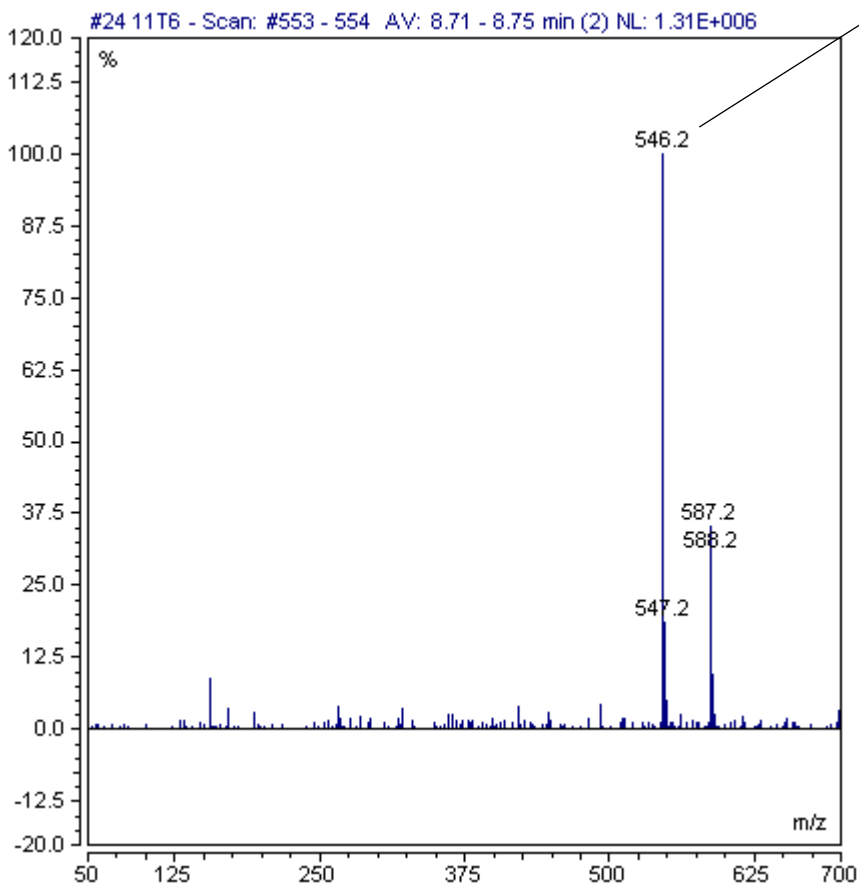

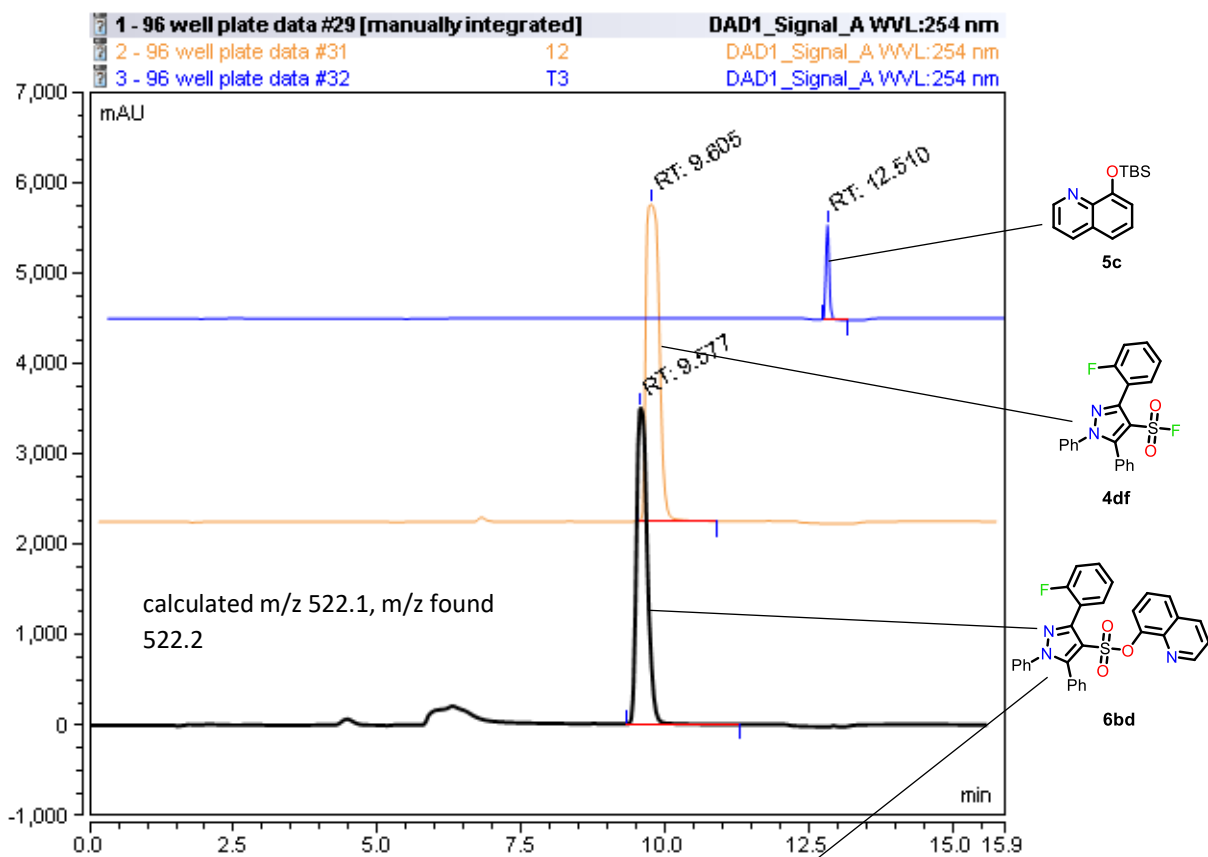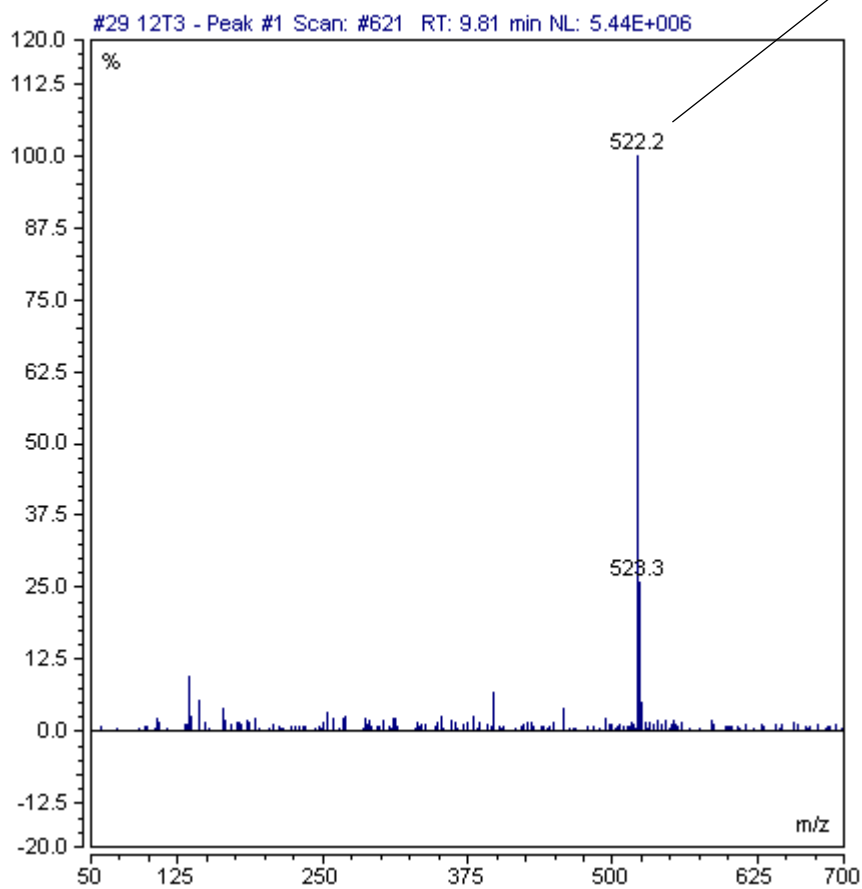

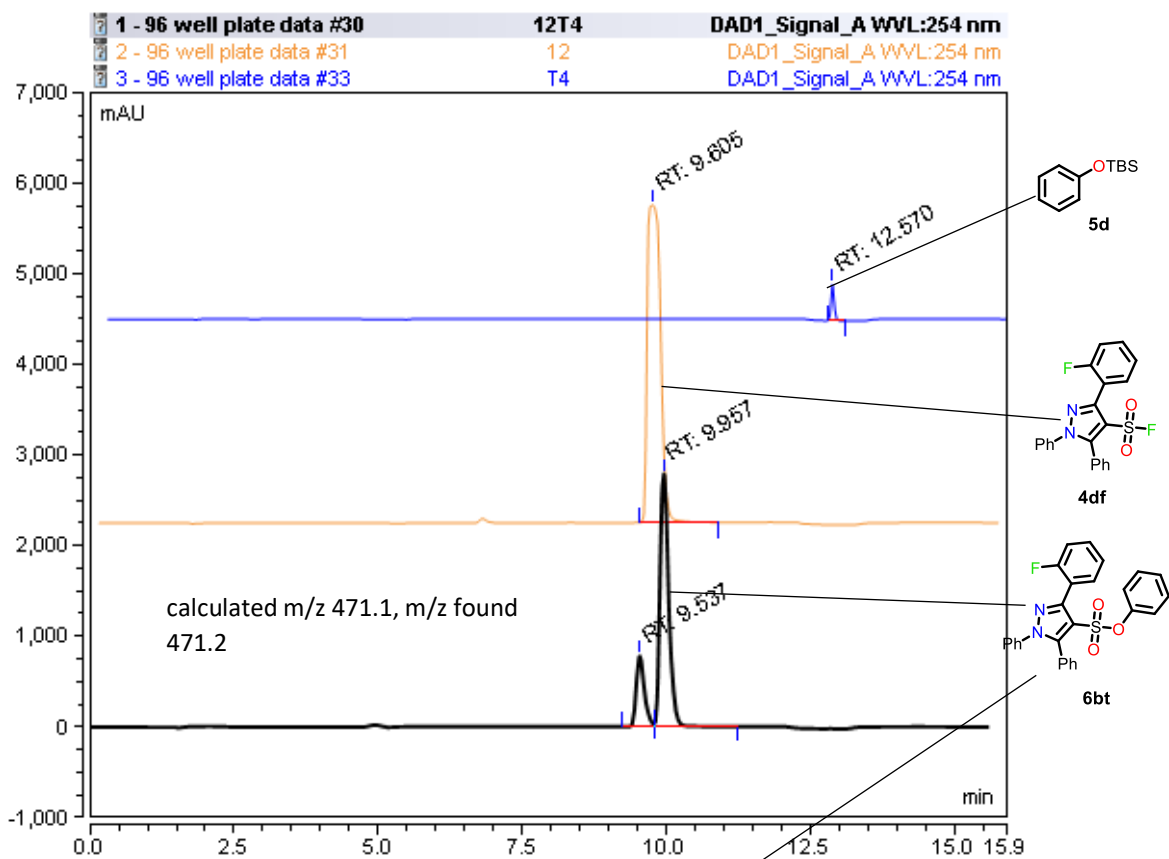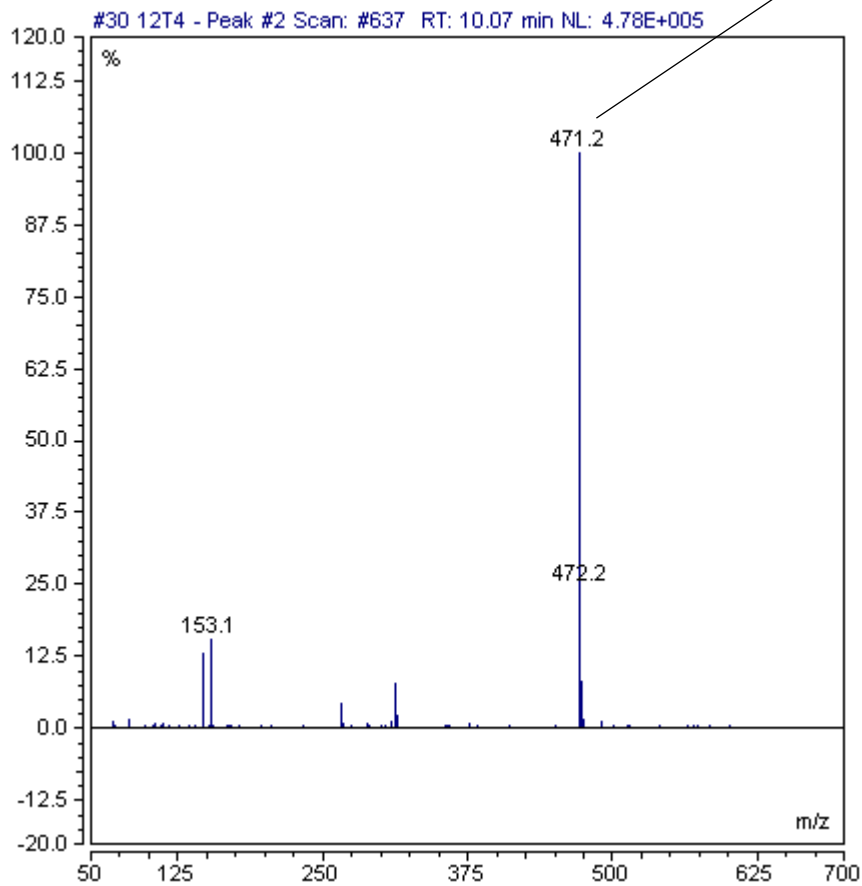

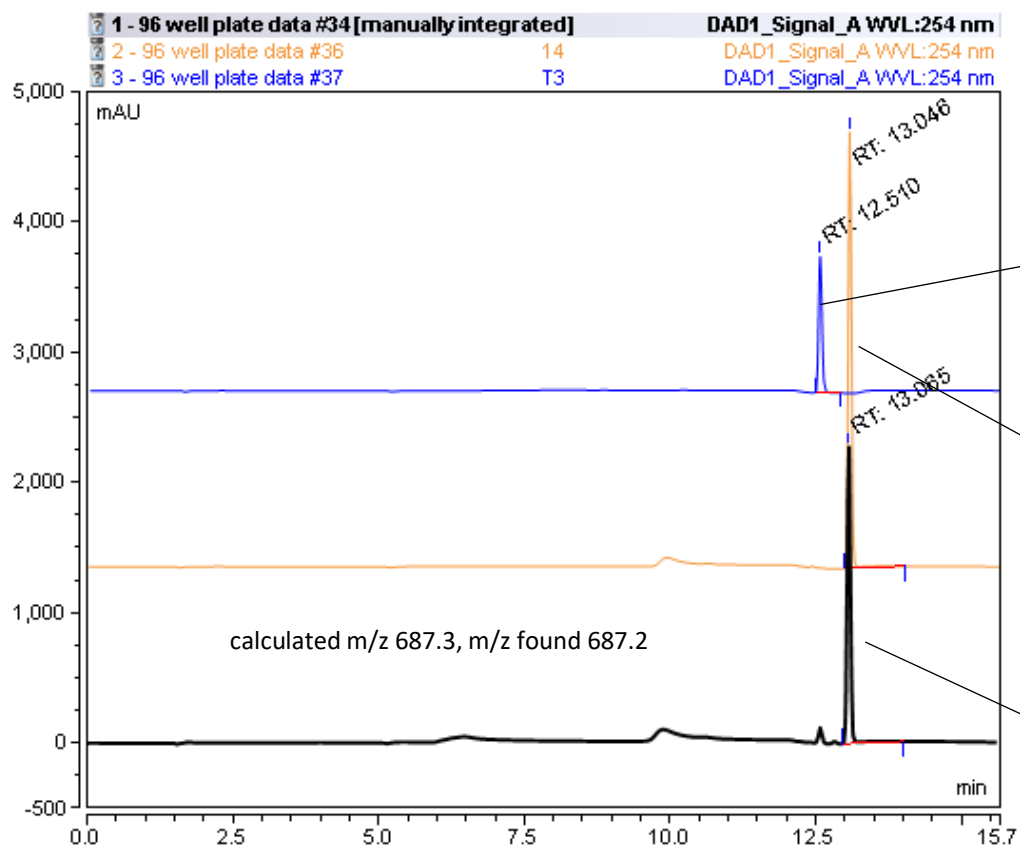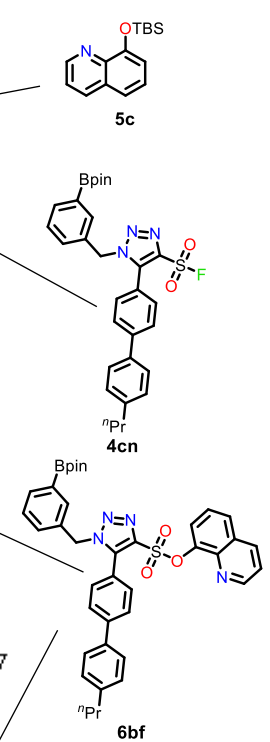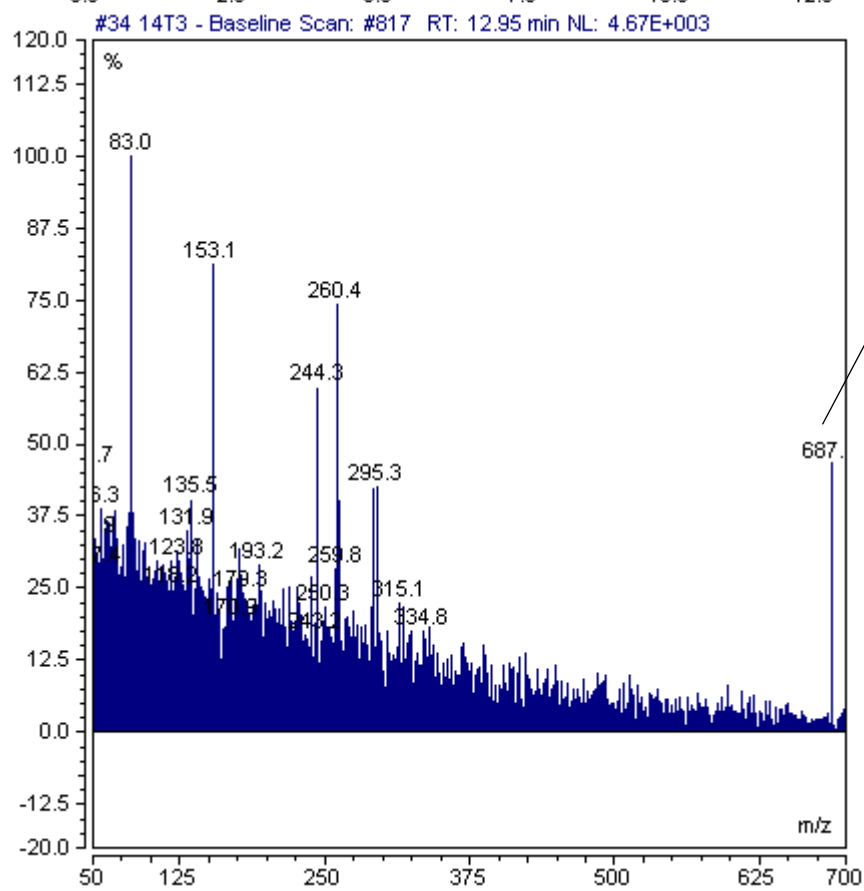

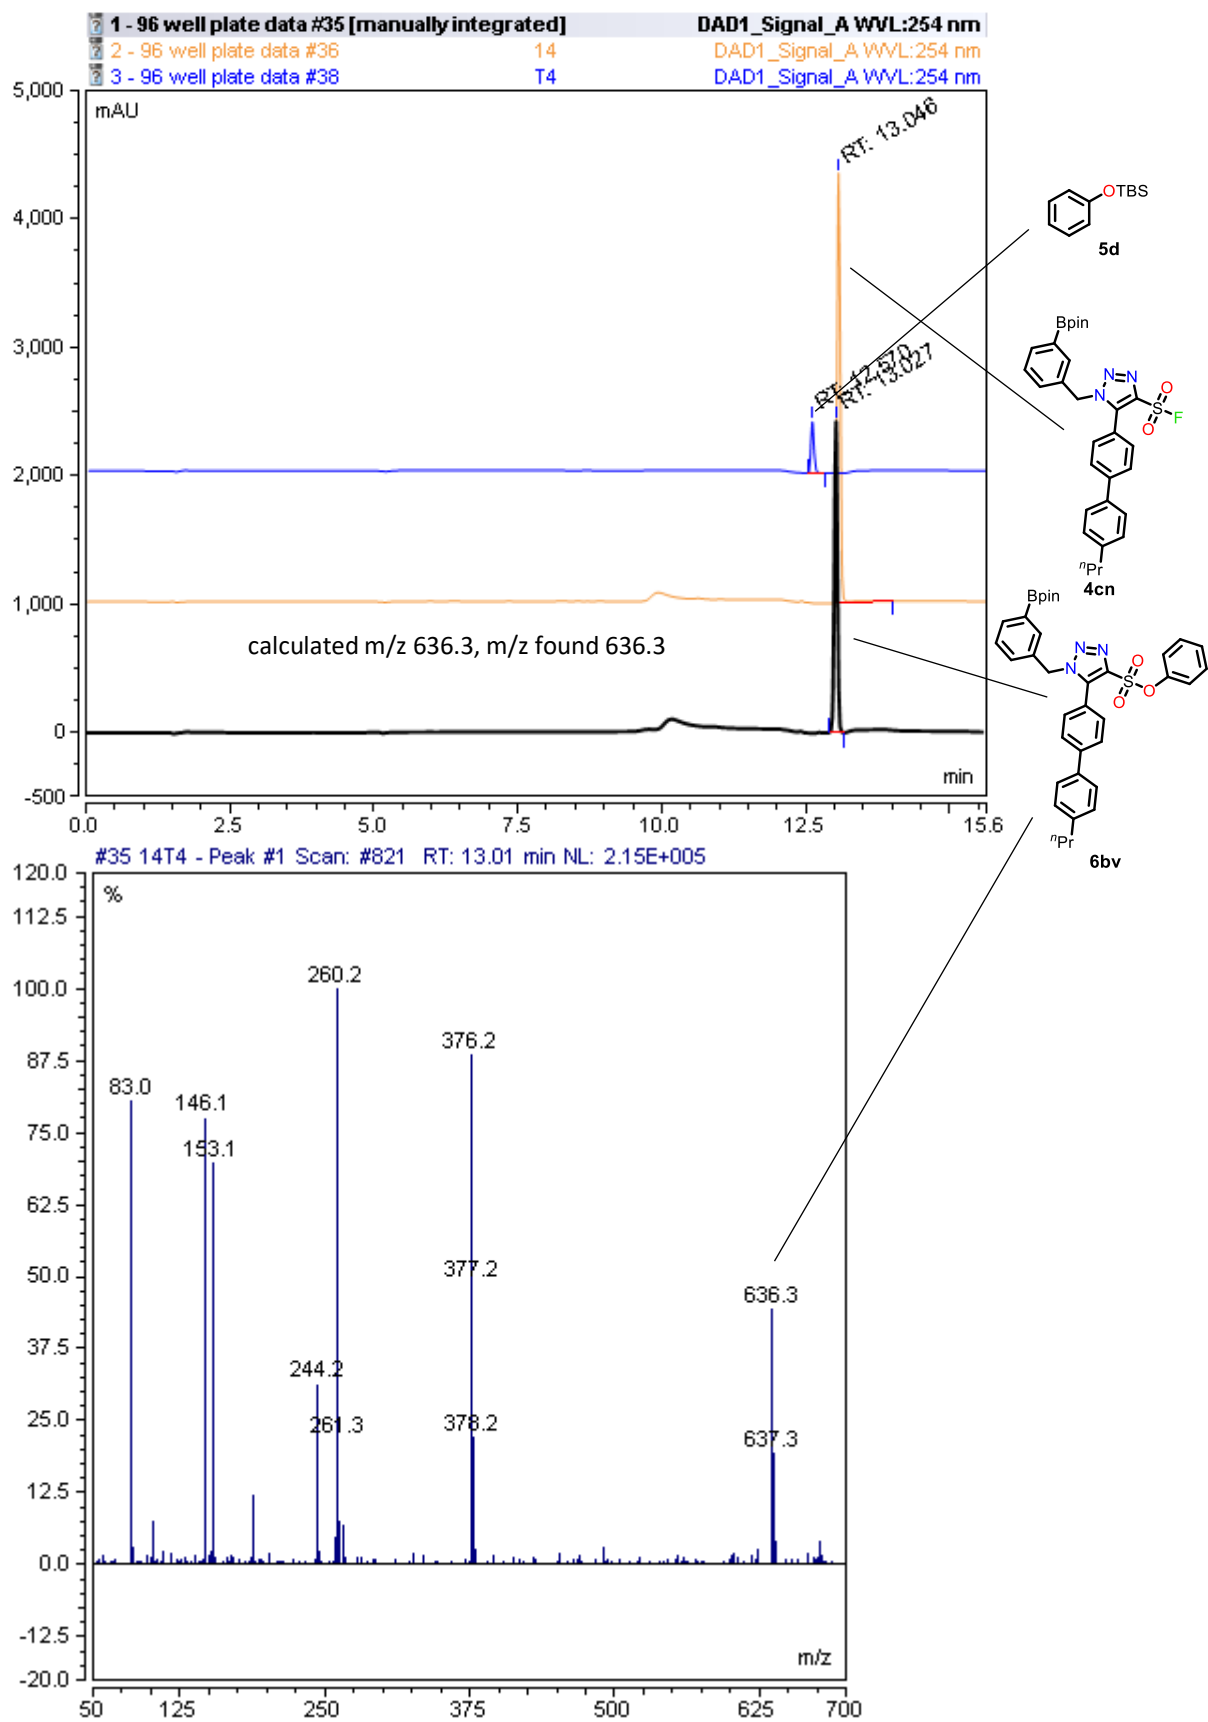

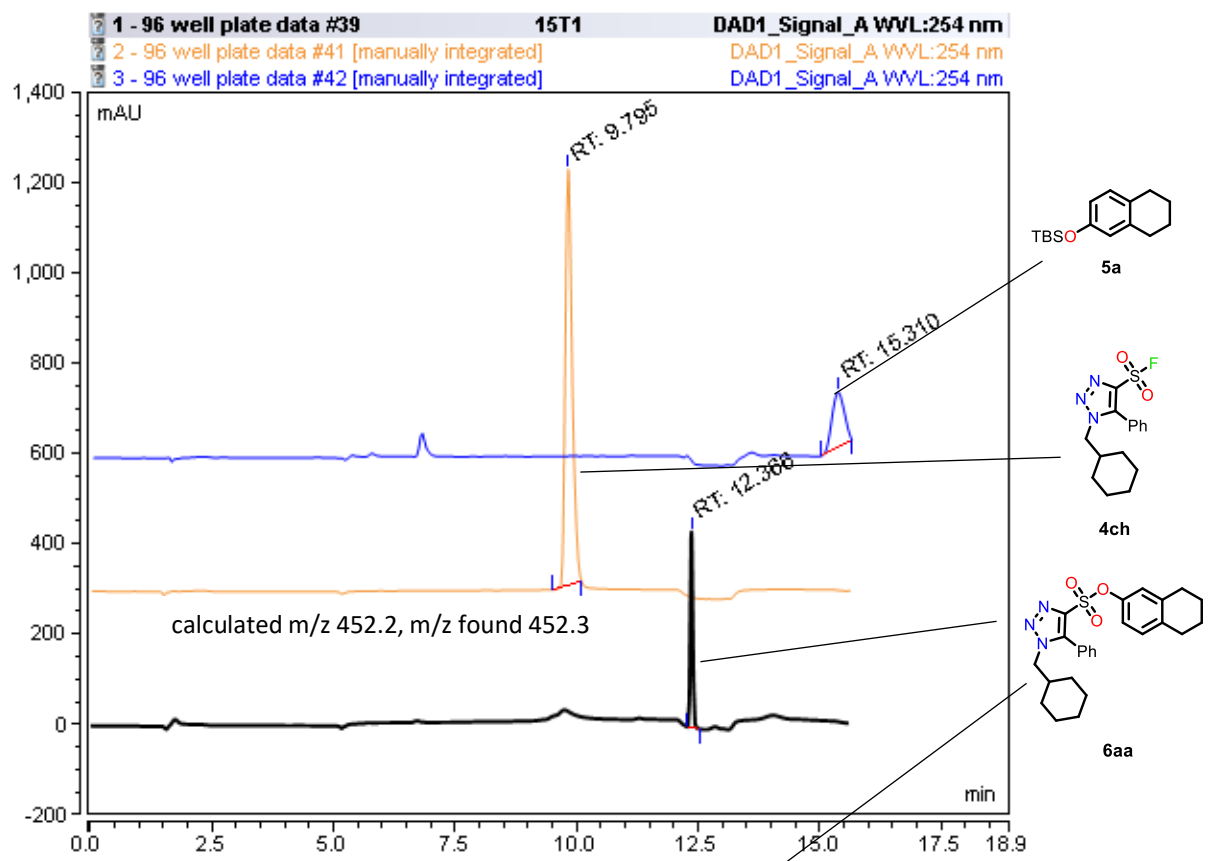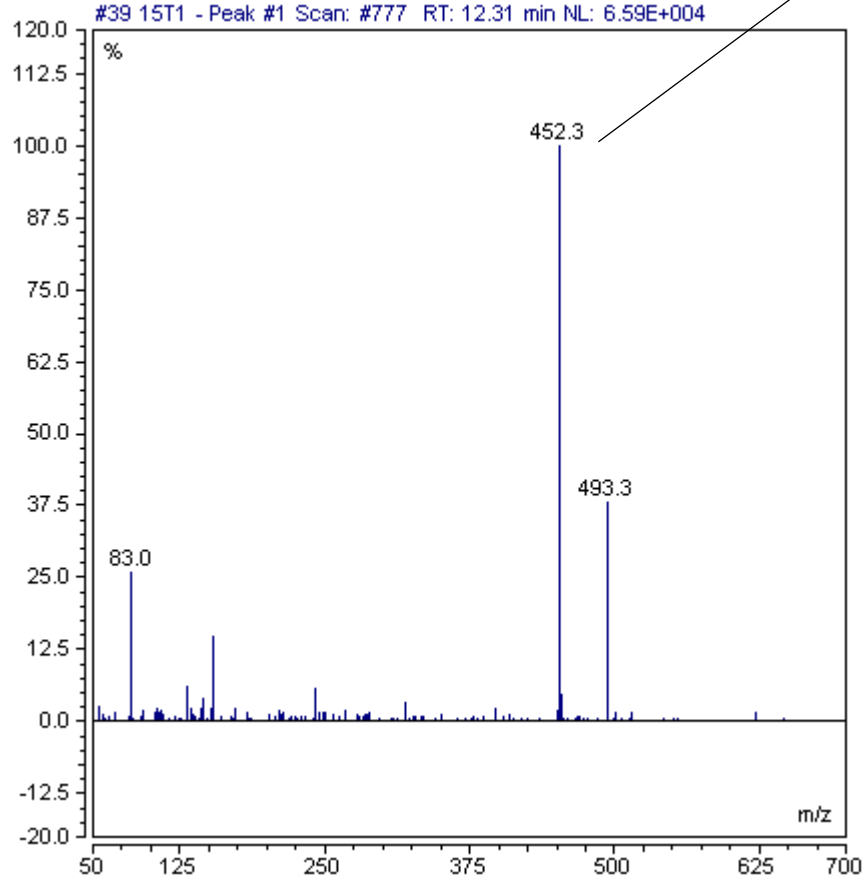



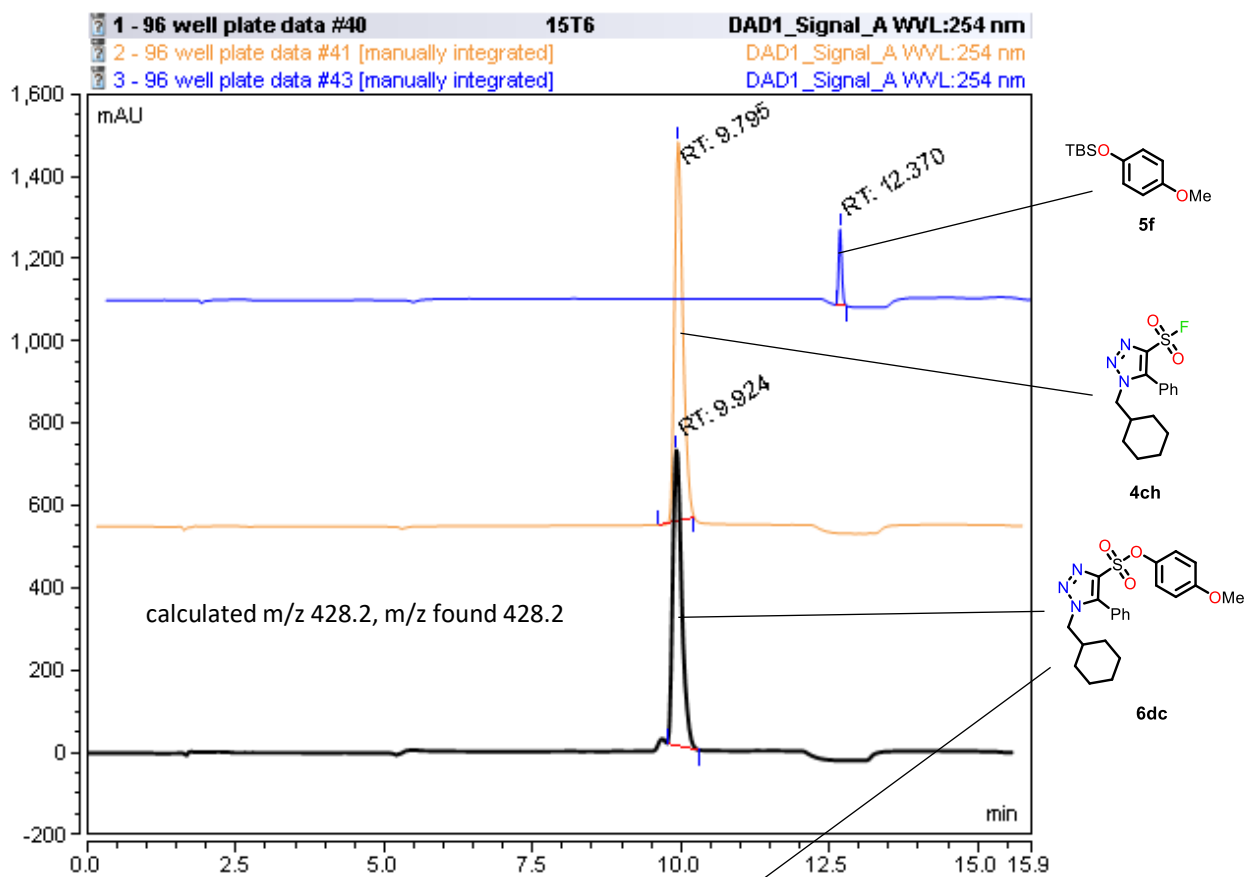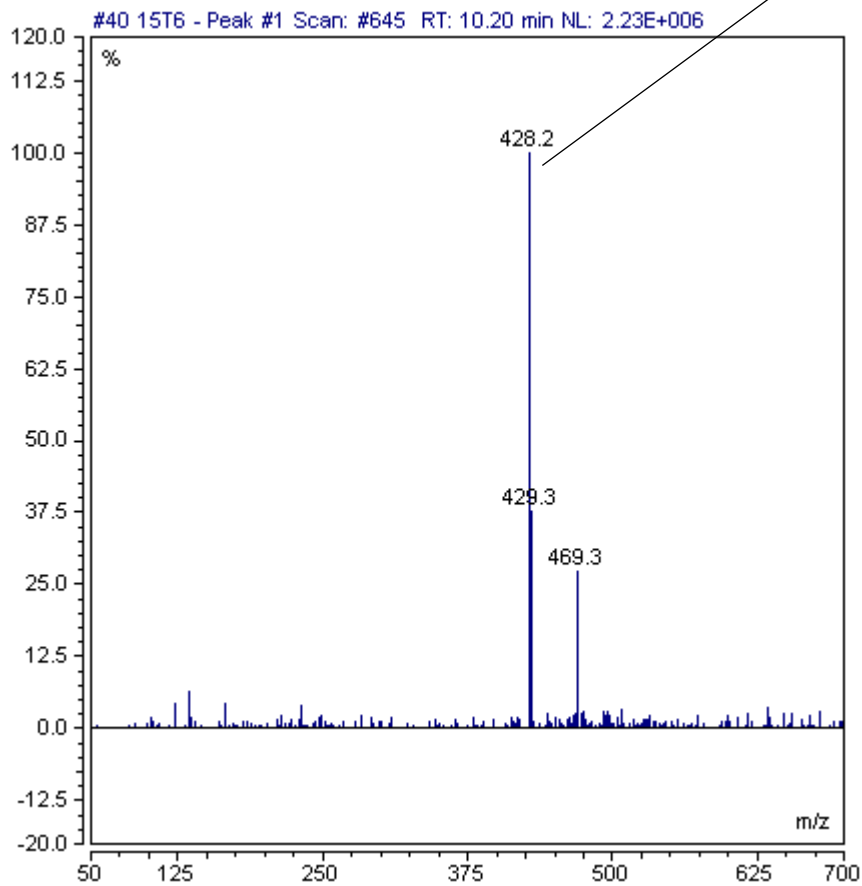

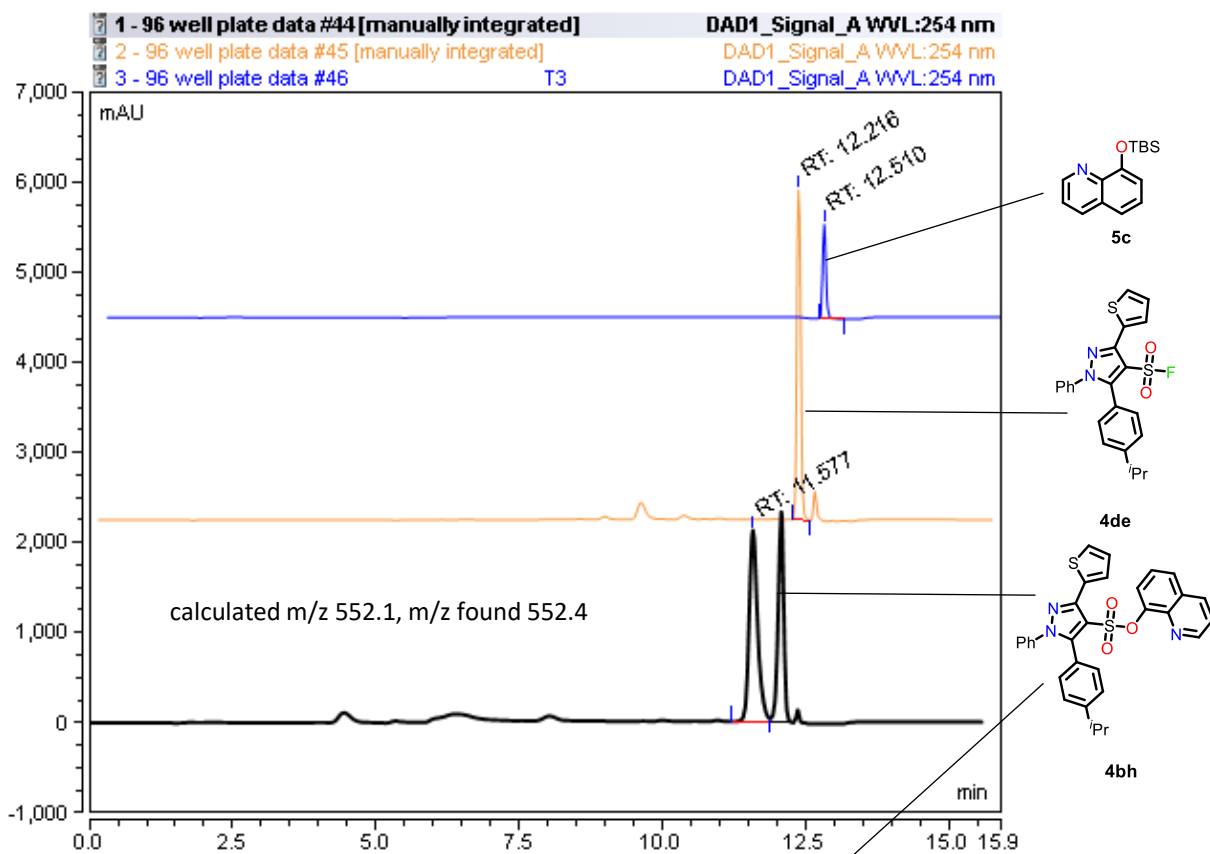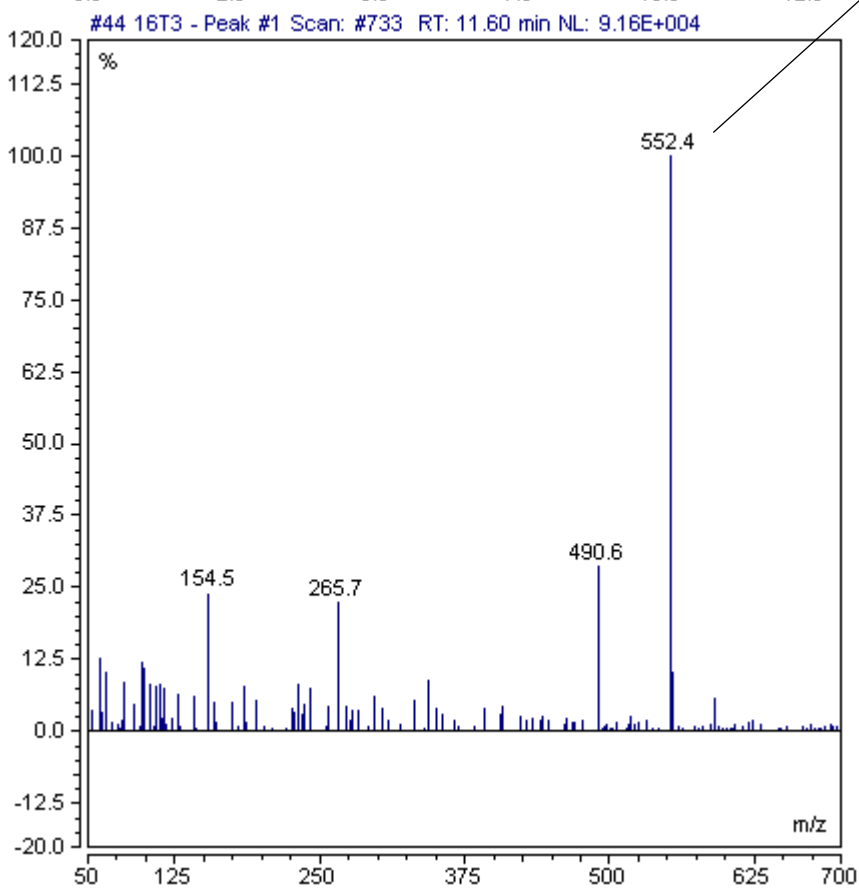

## Experimental procedure for SuFEx reactivity comparison

### Method

Stock solutions of heterocyclic sulfonyl fluorides (5.00  $\mu\text{mol}$ ) or Diels-Alder adducts (5.00  $\mu\text{mol}$ ), TBS ether (5.00  $\mu\text{mol}$ ) and DBU (100 nmol) in  $\text{CD}_3\text{CN}$  were added to a 96 well plate totalling a volume of 500  $\mu\text{L}$  in each well. The plate was agitated at 310 rpm at r.t. for 16 h. The reaction mixture was analysed directly by  $^{19}\text{F}$  qNMR. Integrals extend  $\pm 32\times$  the half height width of the peak except for the competition between compounds 1 and 8 which extends  $\pm 15\times$  the half height width of the peak to avoid peak overlap. The ratio of starting materials remaining was used to determine their relative reactivity.

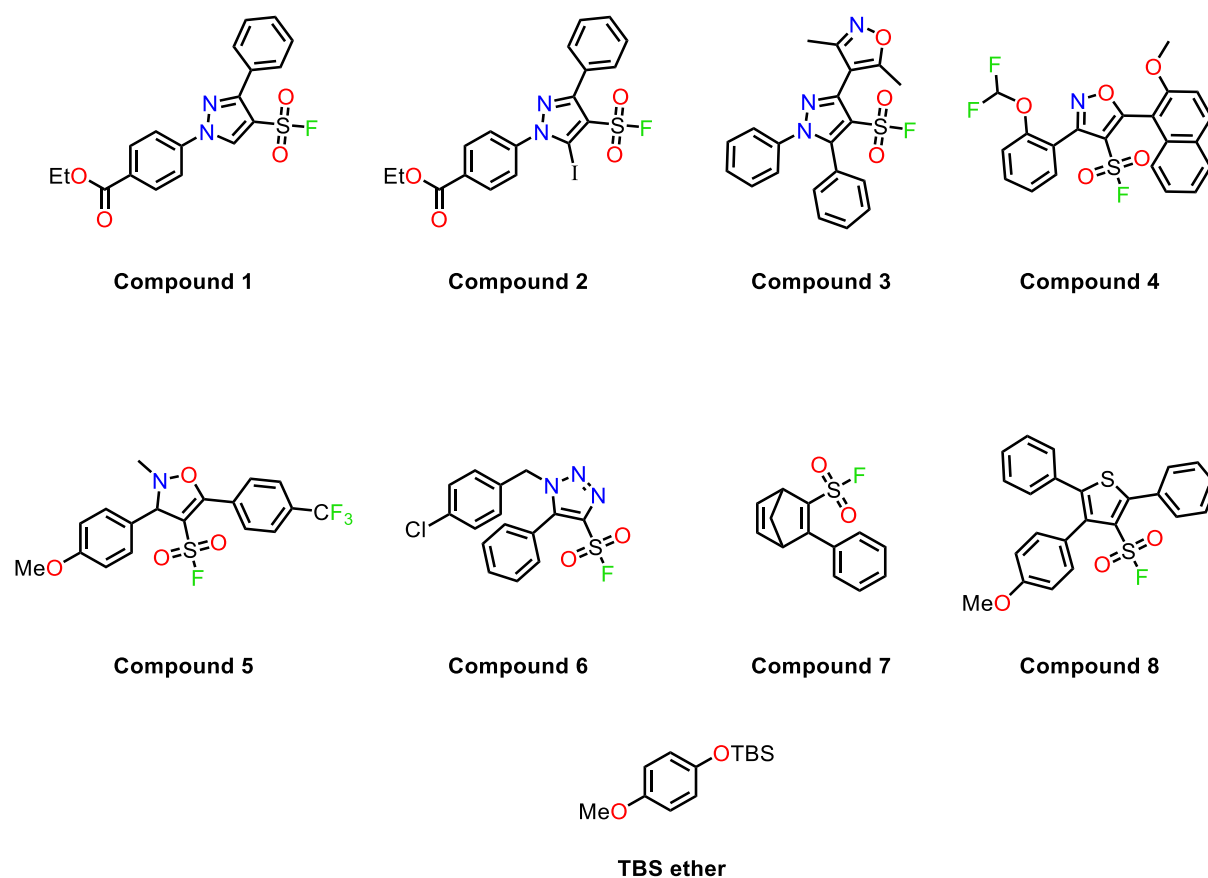

Table 2. SuFEx Competition studies.

| Compound | 1   | 2             | 3   | 4   | 5             | 6   | 7   | 8   |
|----------|-----|---------------|-----|-----|---------------|-----|-----|-----|
| 1        |     | 2>1           | 1>3 | 4>1 | 5>1           | 6>1 | 1>7 | 8>1 |
| 2        | 2>1 |               | 2>3 | 2>4 | 2 $\approx$ 5 | 6>2 | 2>7 | 2>8 |
| 3        | 1>3 | 2>3           |     | 4>3 | 5>3           | 6>3 | 3>7 | 8>3 |
| 4        | 4>1 | 2>4           | 4>3 |     | 5>4           | 6>4 | 4>7 | 4>8 |
| 5        | 5>1 | 2 $\approx$ 5 | 5>3 | 5>4 |               | 6>5 | 5>7 | 8>5 |
| 6        | 6>1 | 6>2           | 6>3 | 6>4 | 6>5           |     | 6>7 | 6>8 |
| 7        | 1>7 | 2>7           | 3>7 | 4>7 | 5>7           | 6>7 |     | 8>7 |
| 8        | 8>1 | 2>8           | 8>3 | 4>8 | 8>5           | 6>8 | 8>7 |     |

# <sup>1</sup>H, <sup>13</sup>C and <sup>19</sup>F NMR spectra

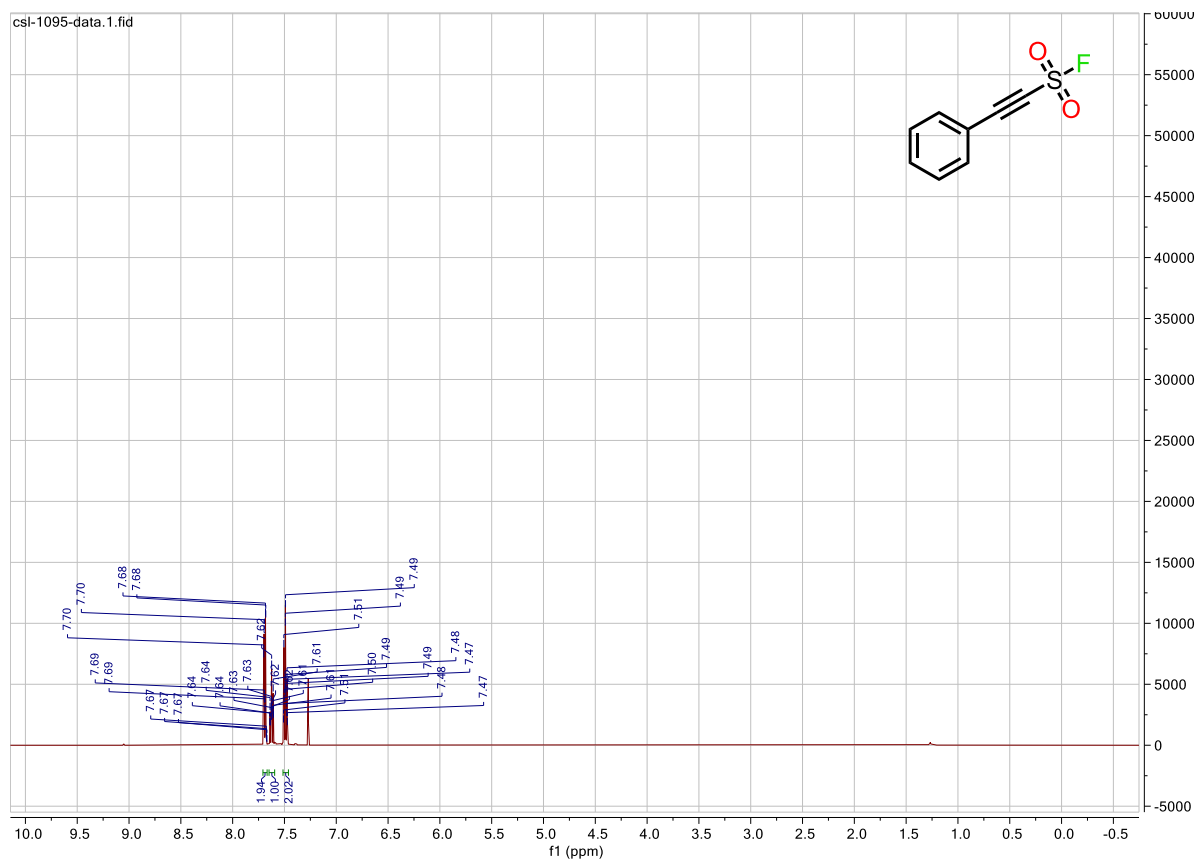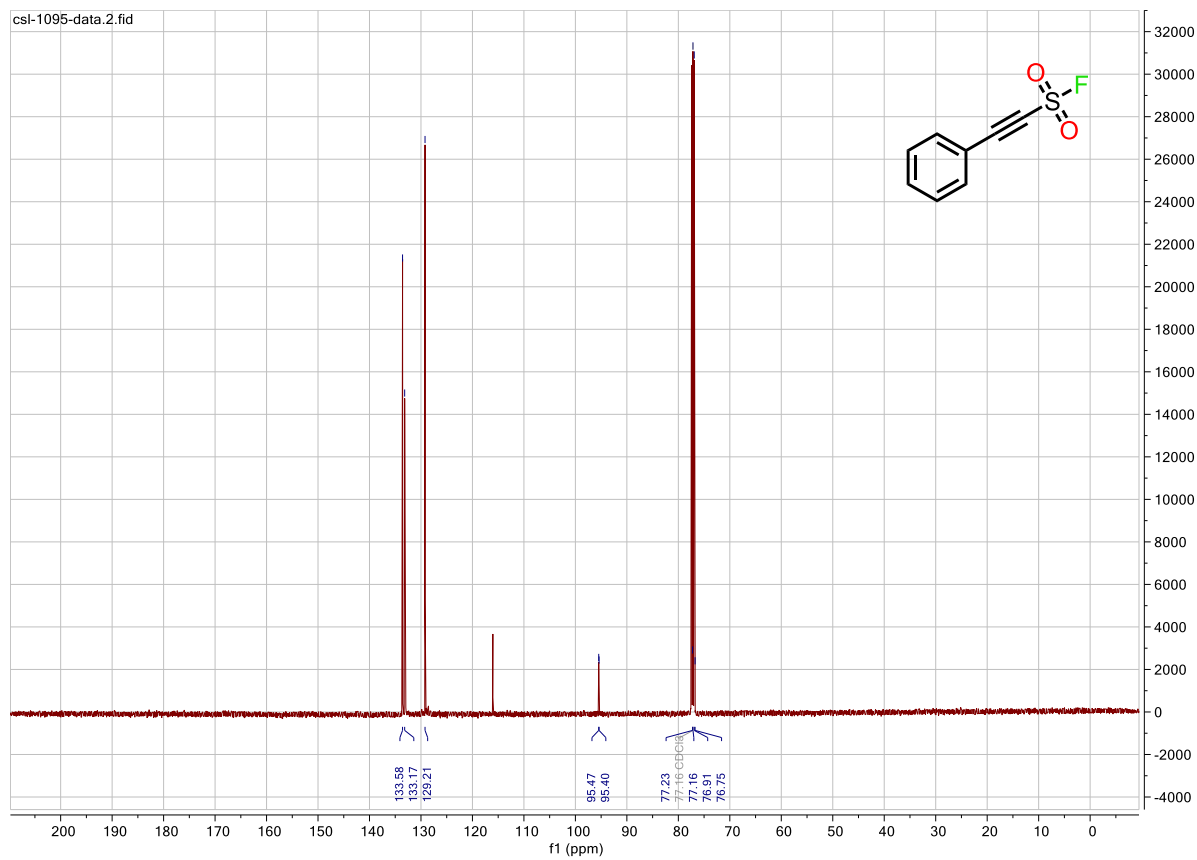

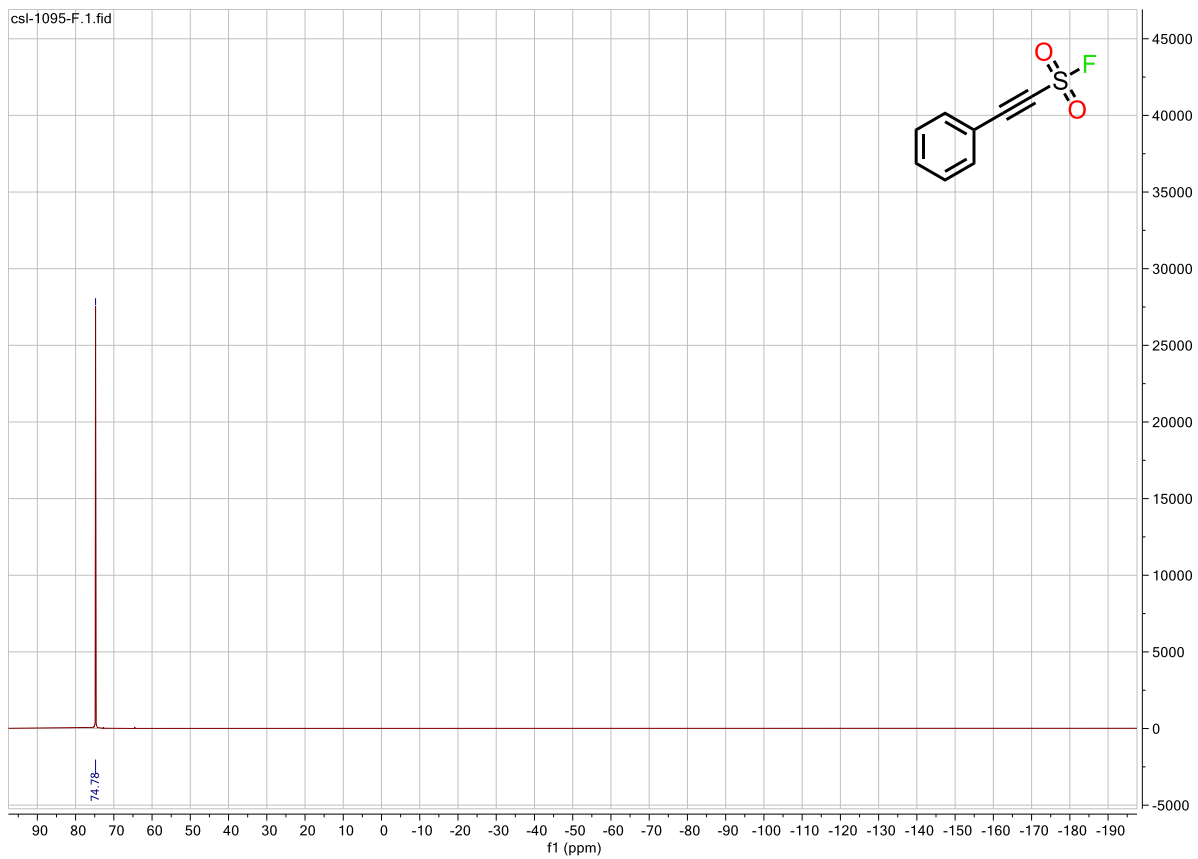

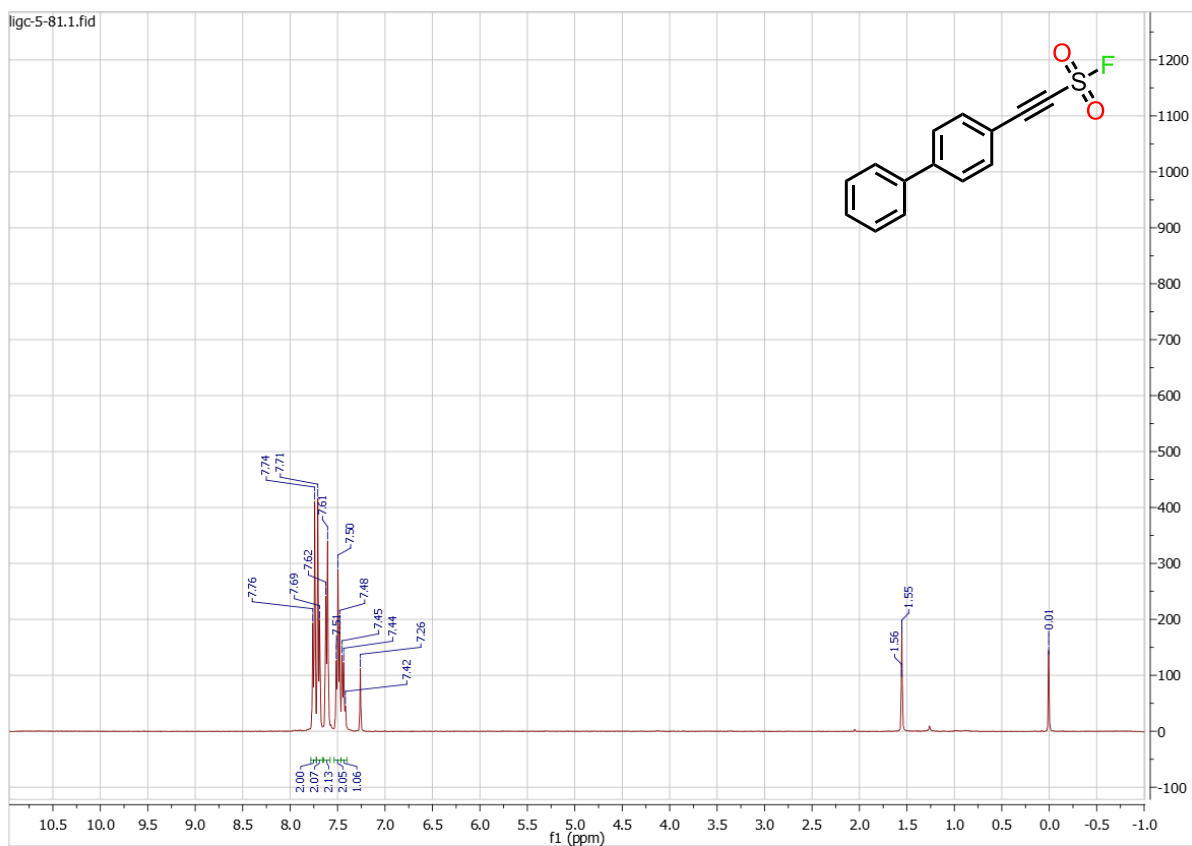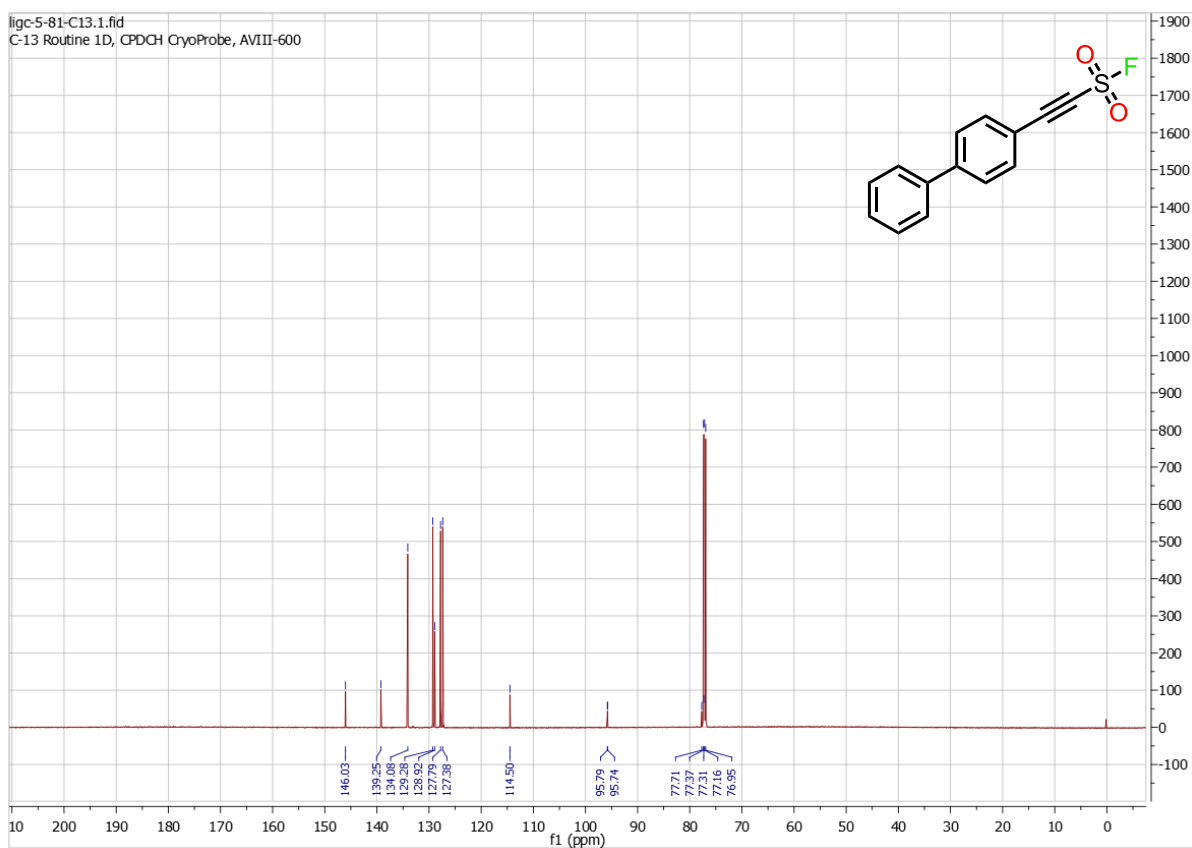

ligc-5-81-F.1.fid  
F-19, CDCl3, DPX-400 QNP Probe. CF3Cl as Ref at 0 ppm.

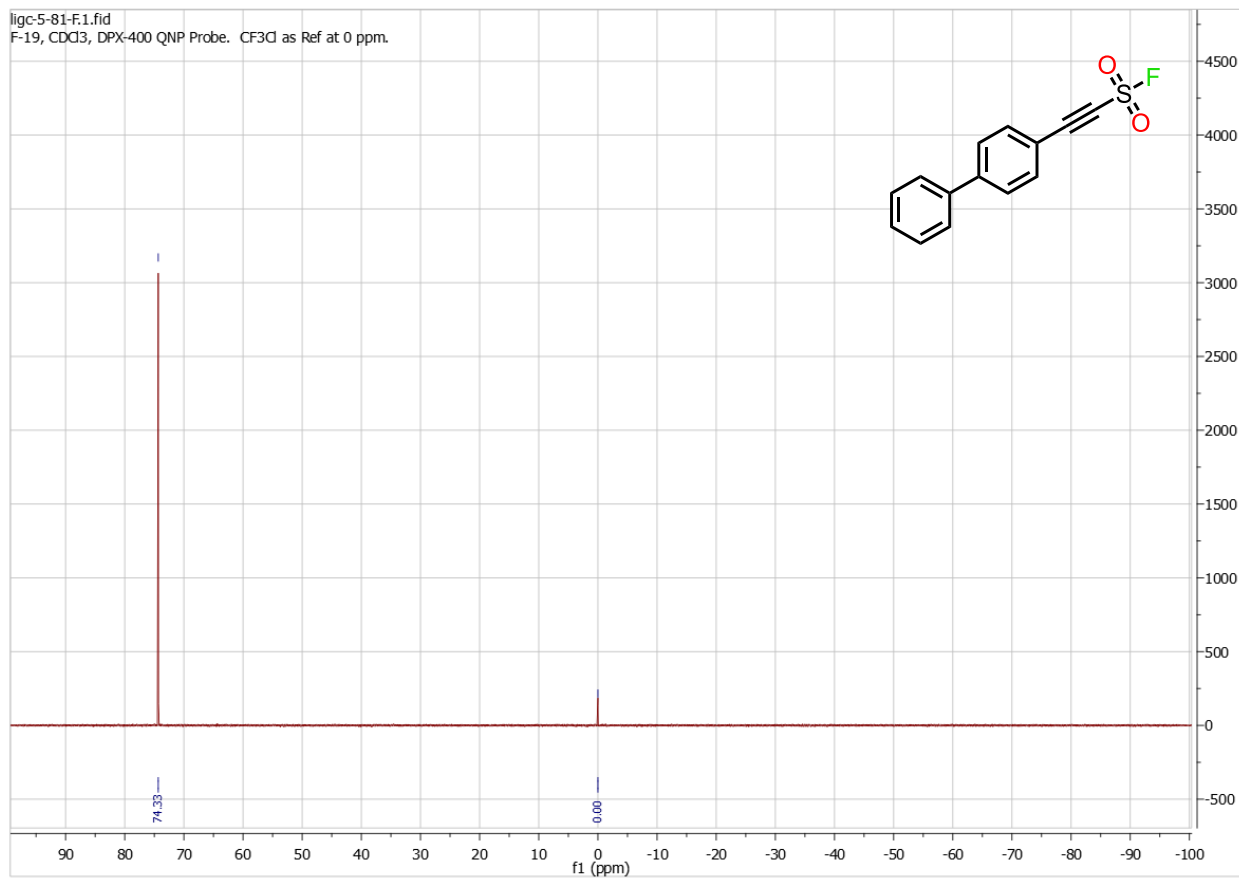

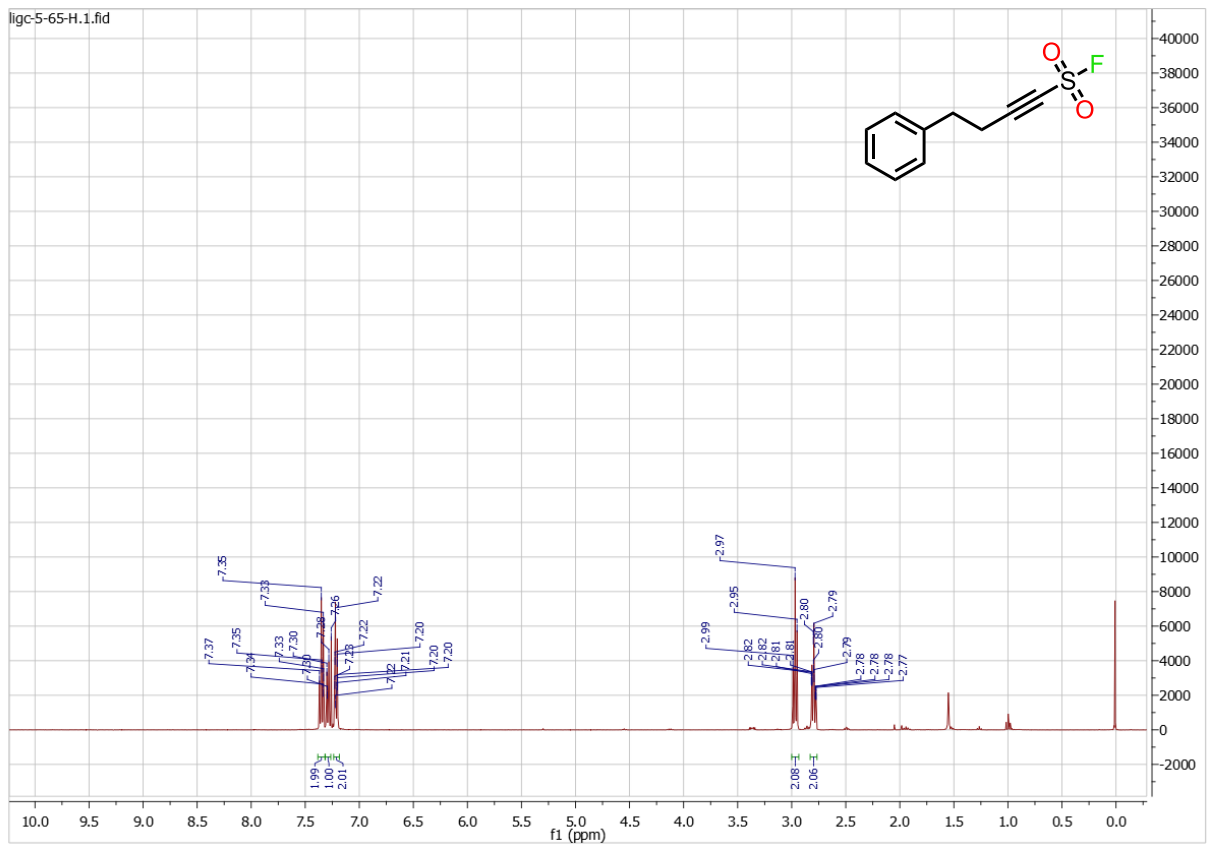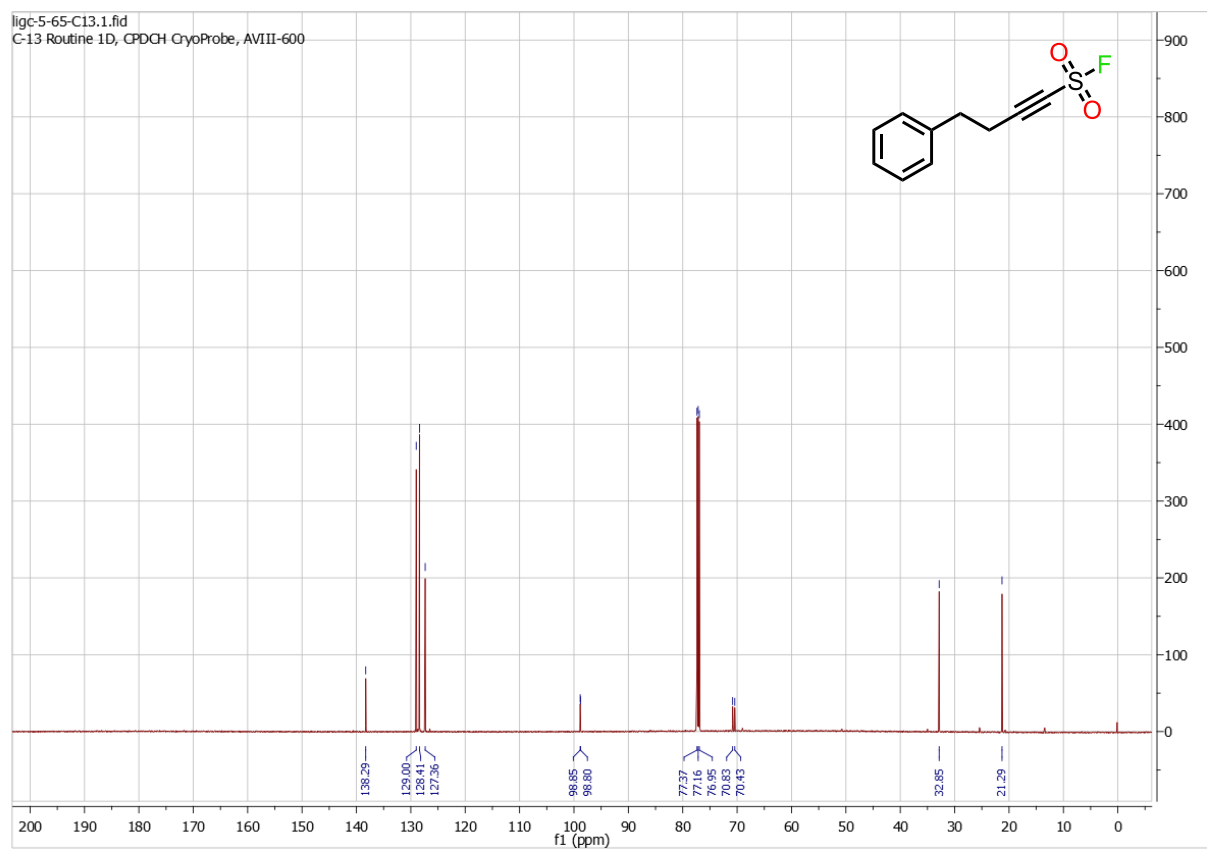



lgc-5-65-F.1.fid  
AV400 BBOF Probe, F-19 in CDCl3, CFC13=0 ppm.

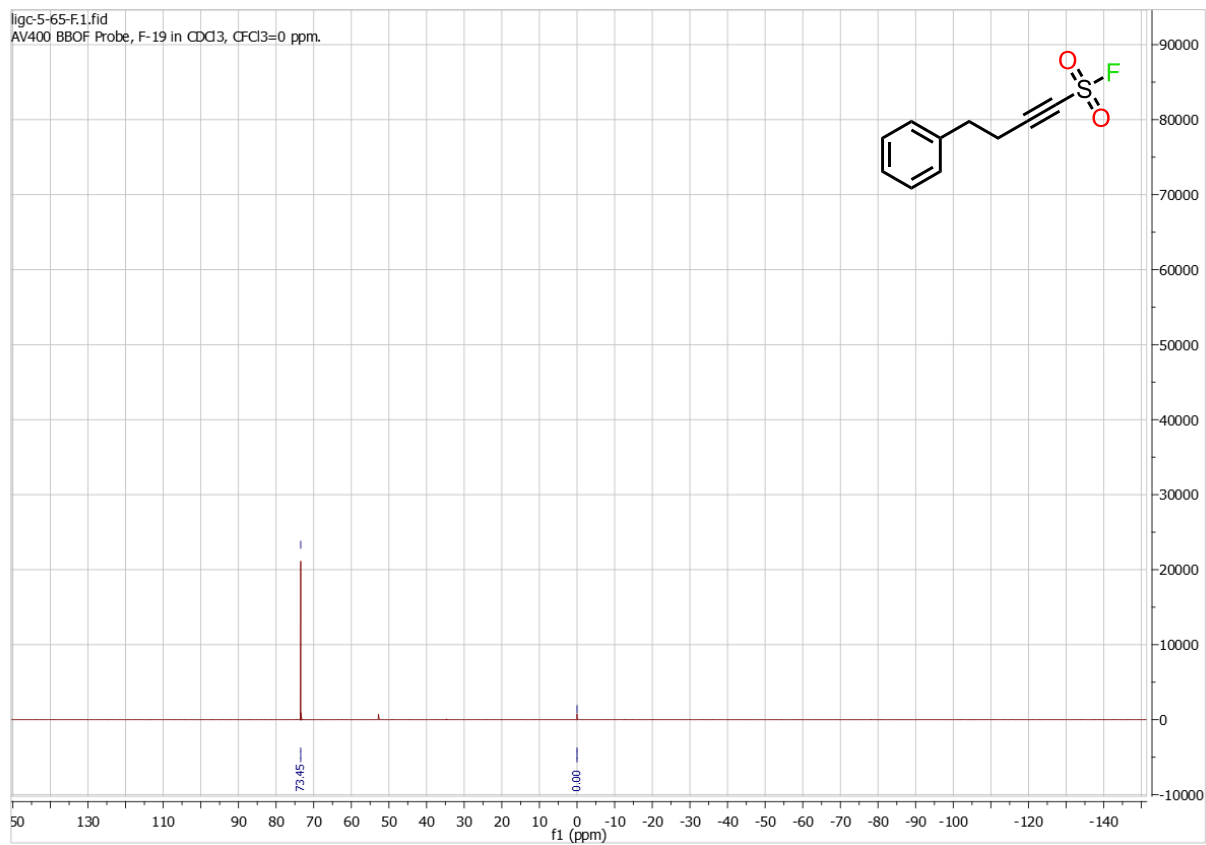

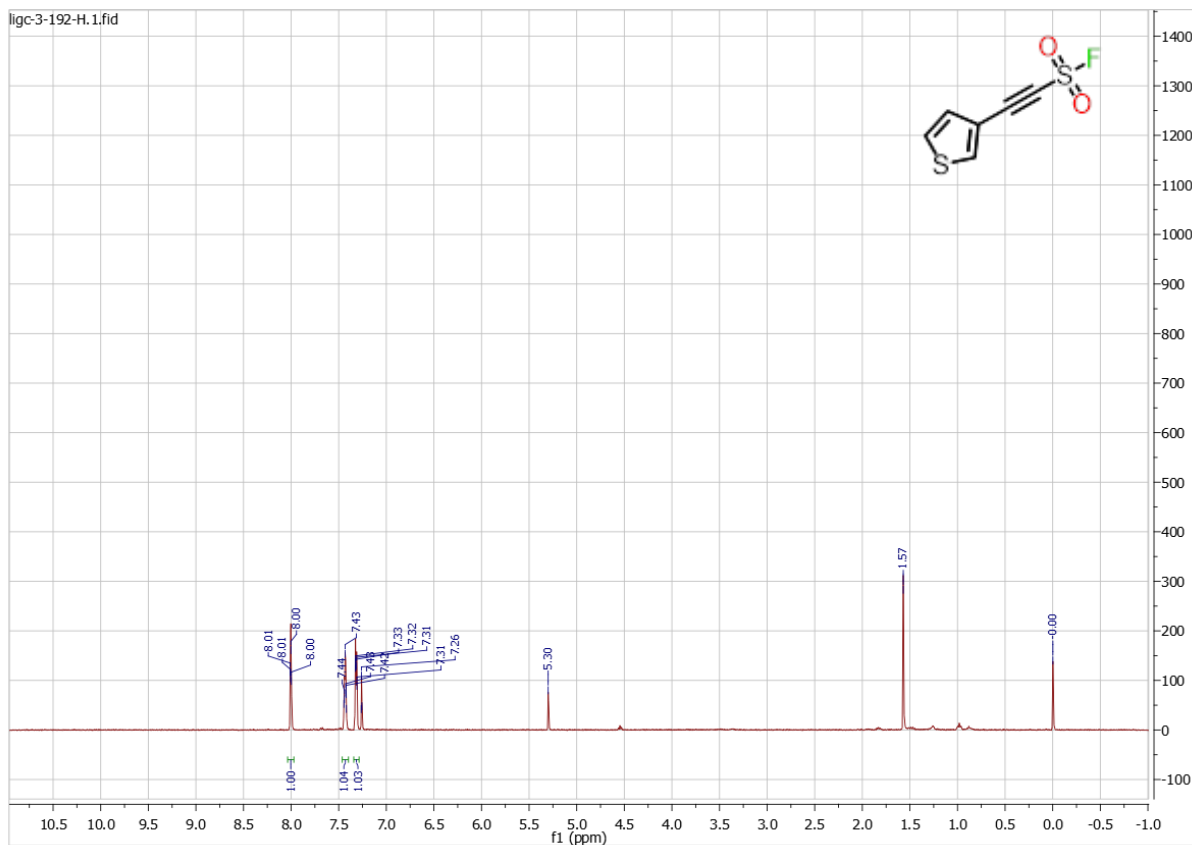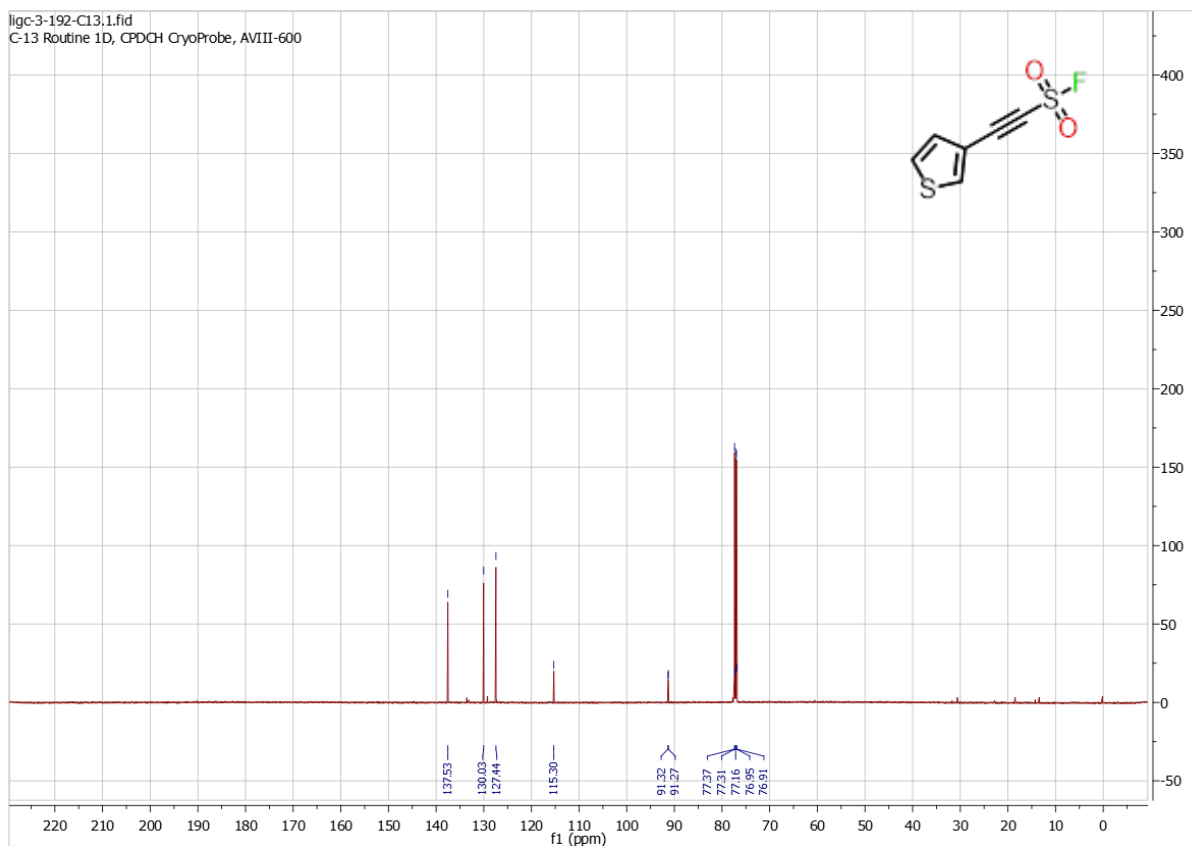

ligc-3-192-F.1.fid  
F-19, CDCl<sub>3</sub>, DPX-400 QNP Probe. CF<sub>3</sub>Cl as Ref at 0 ppm.

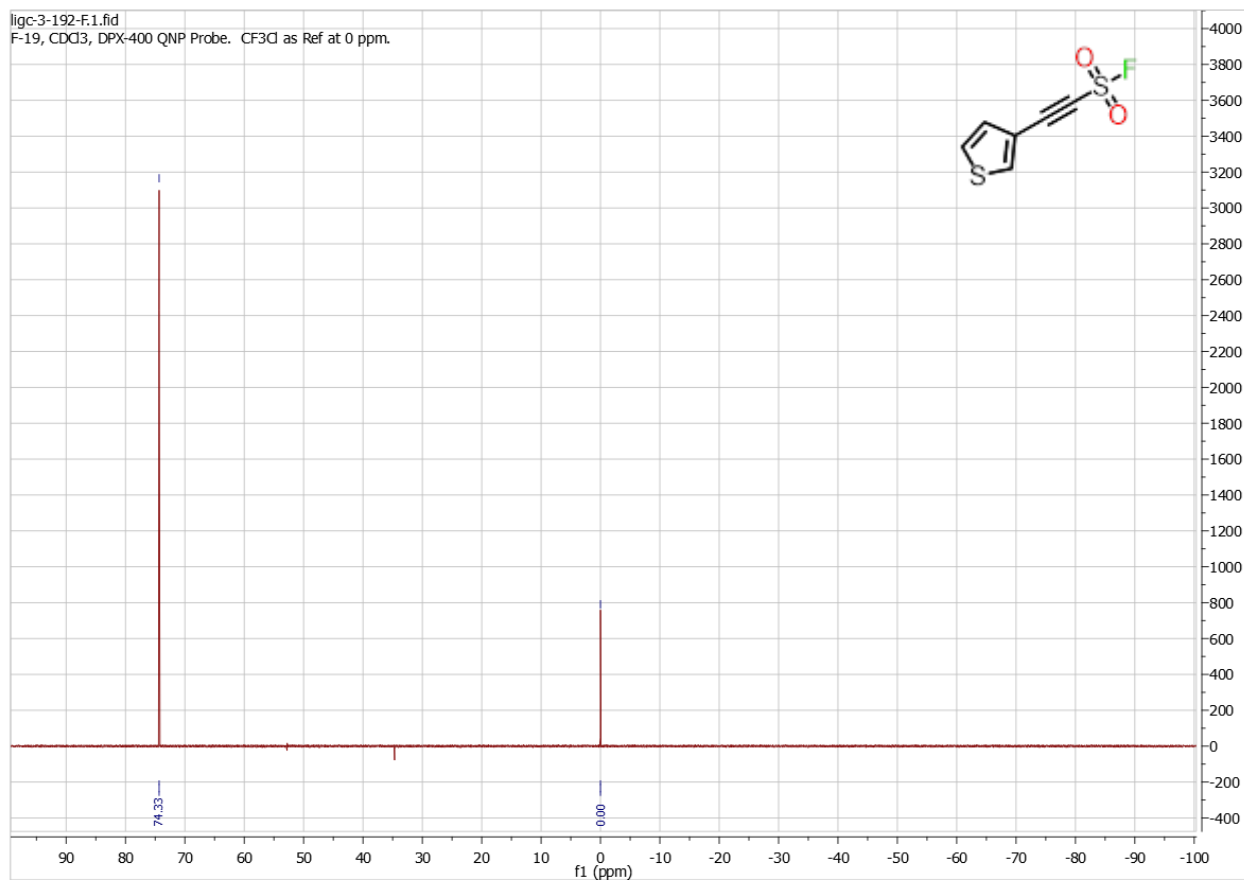

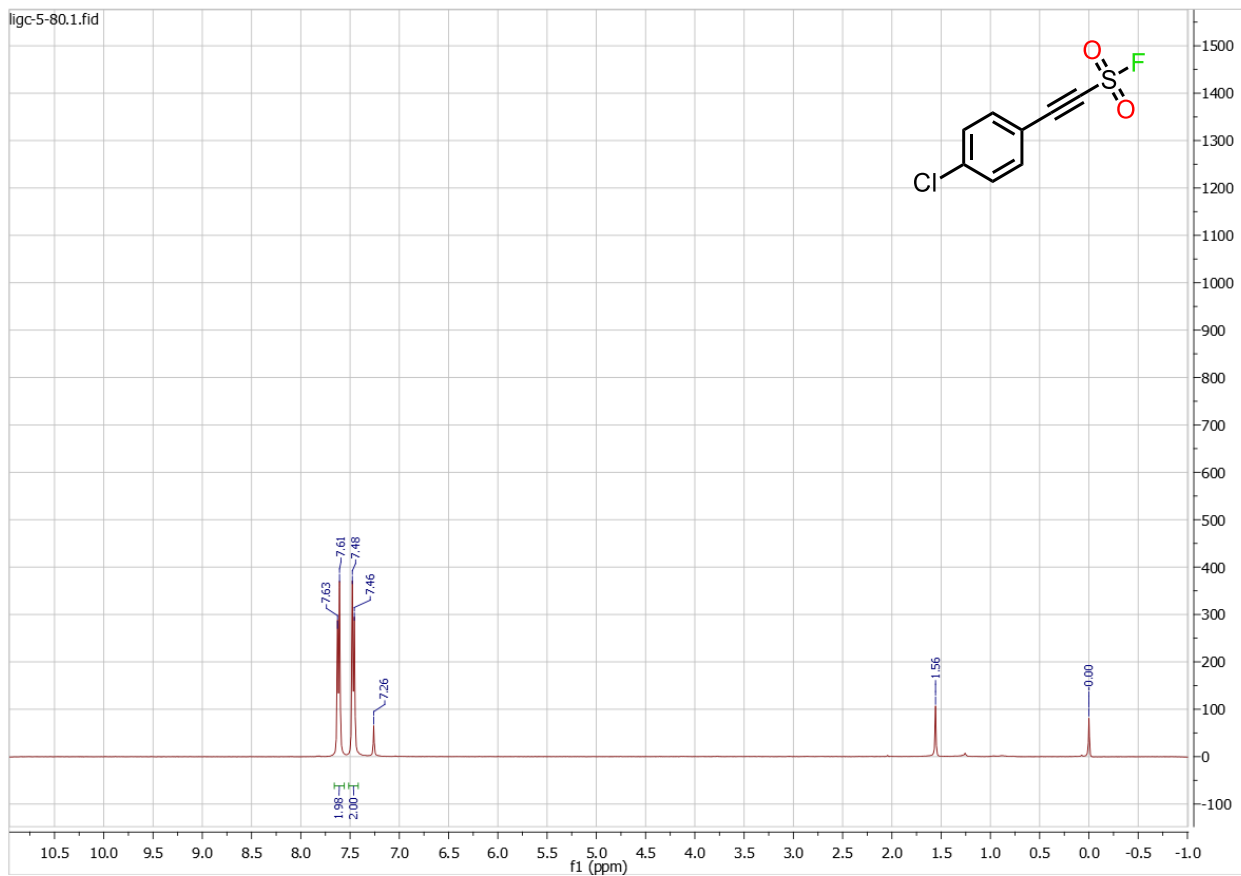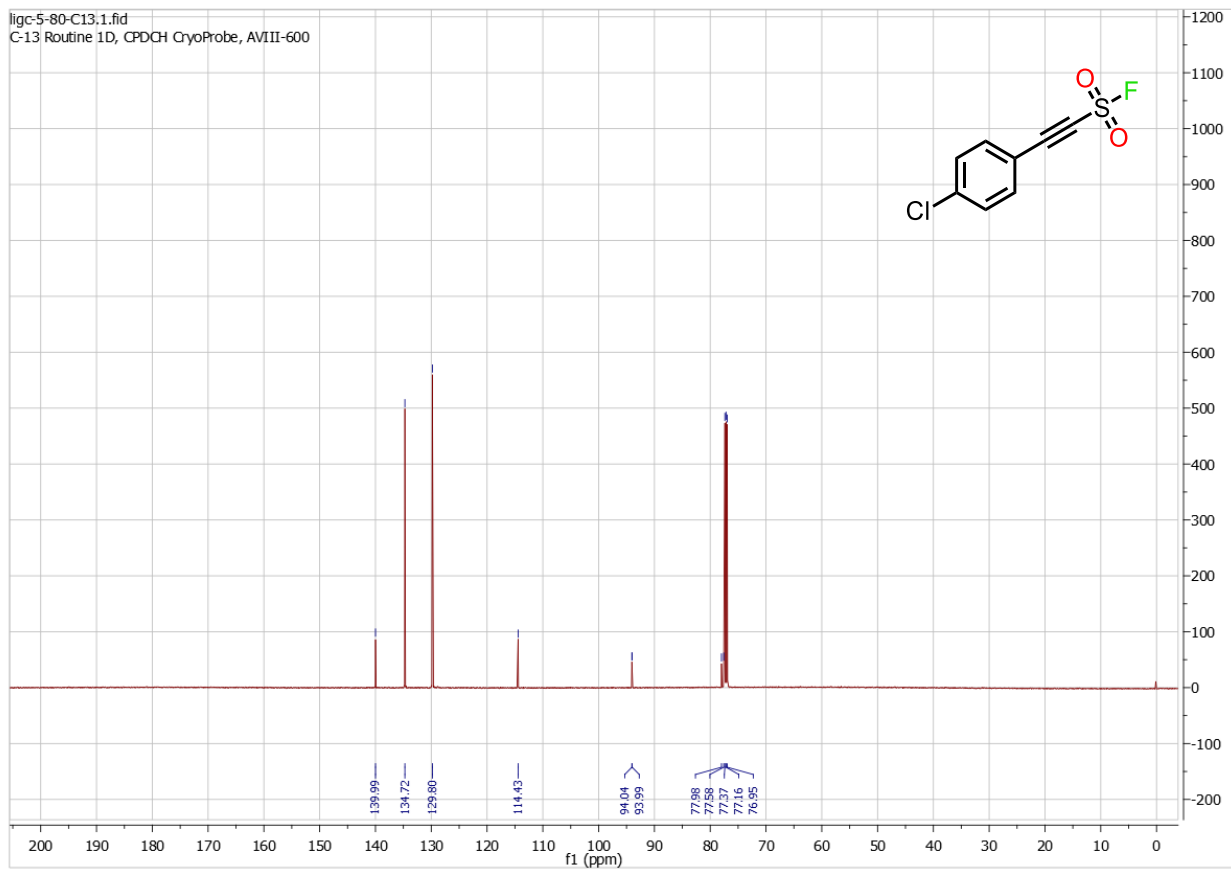

fig-5-80-F.1.fid  
F-19, CDCl3, DPX-400 QNP Probe. CF3Cl as Ref at 0 ppm.

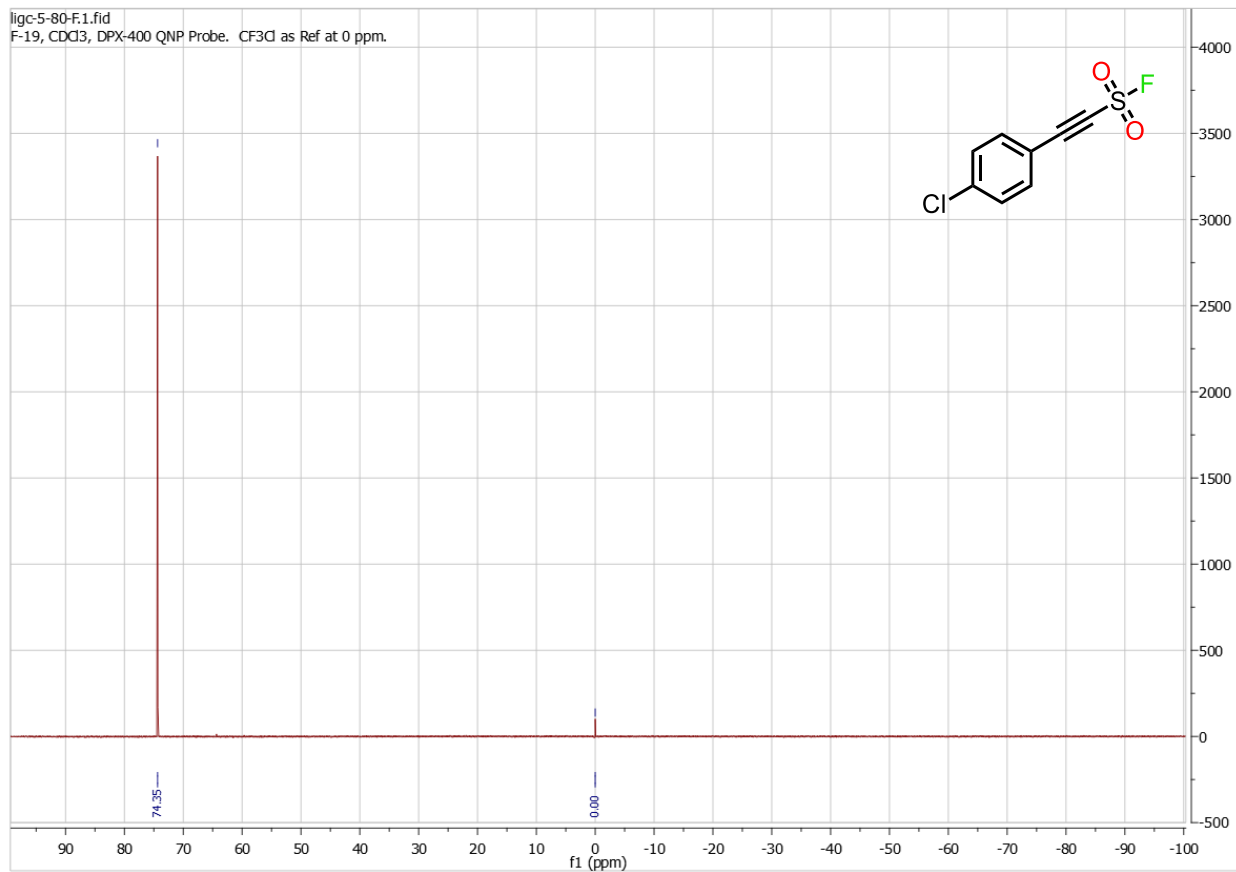

yunfei-1-7-H.1.fid

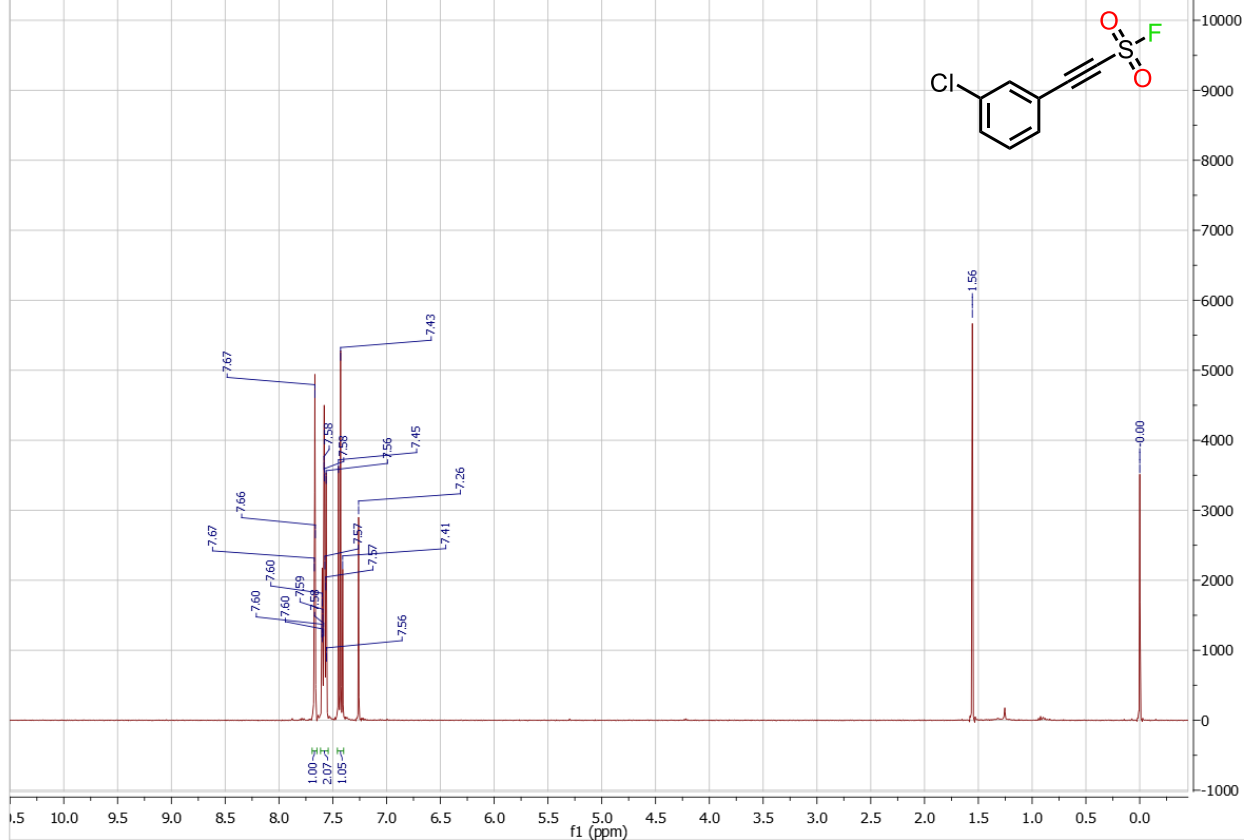

yunfei-1-7-C13.1.fid  
C-13 Routine 1D, CPDCH CryoProbe, AVIII-600

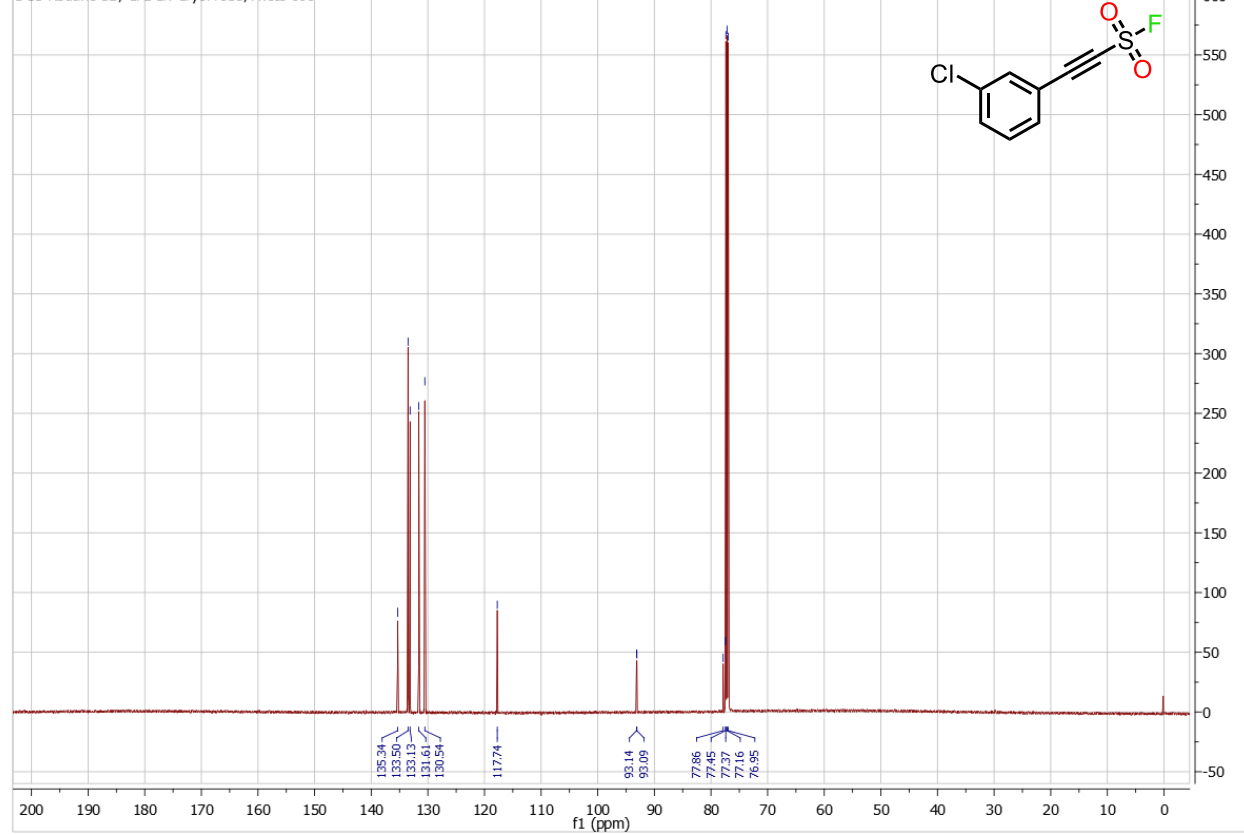

yunfei-1-7-F.1.fid  
AV400 BBOF Probe, F-19 in CDCl3, CFCl3=0 ppm.

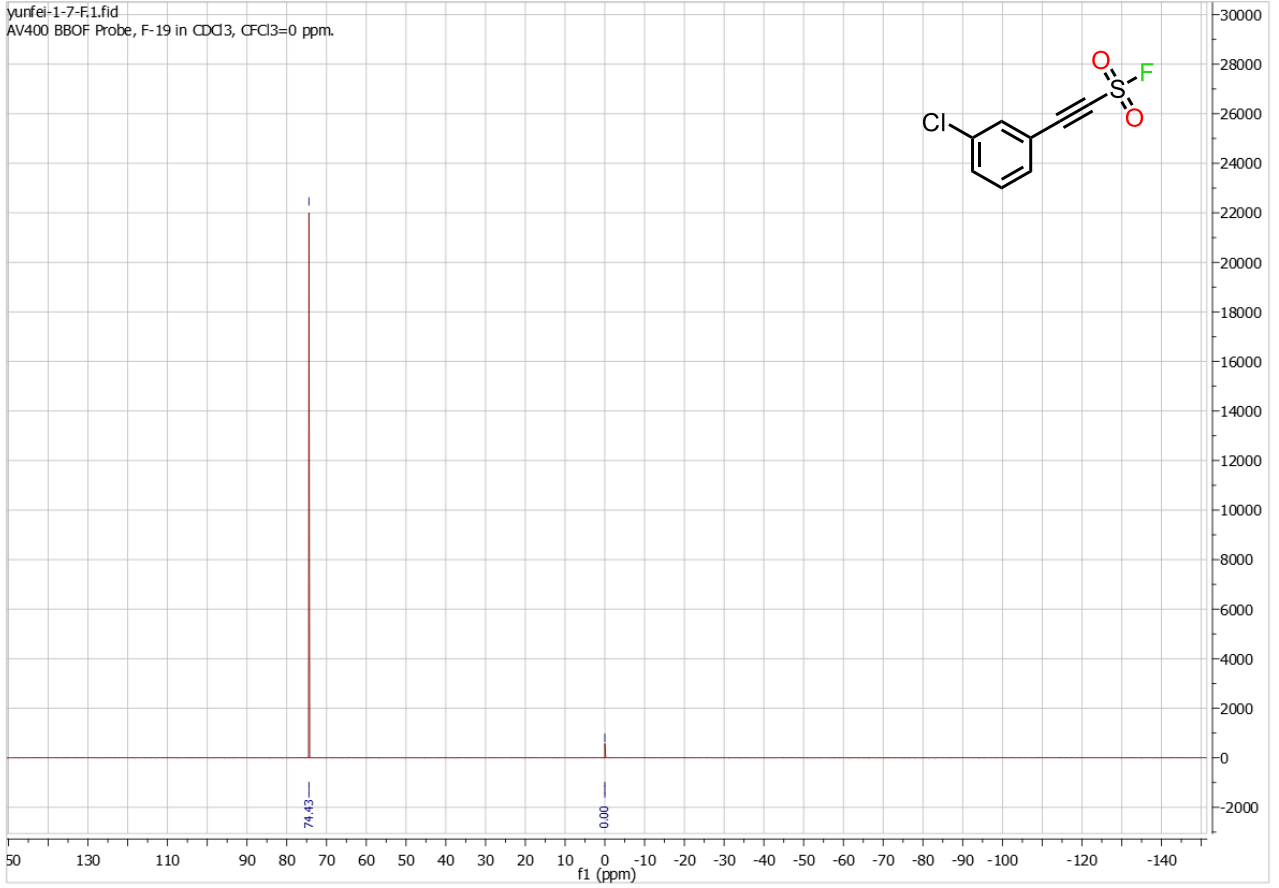

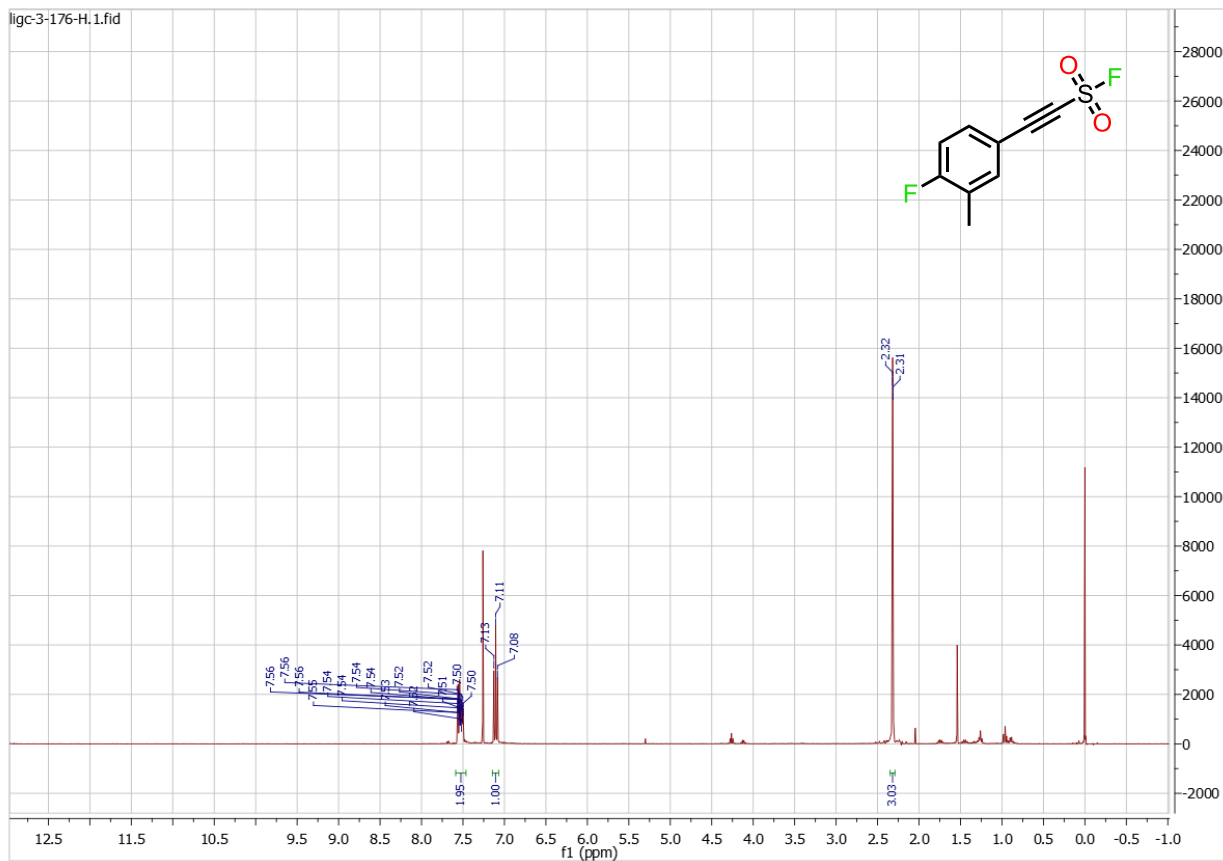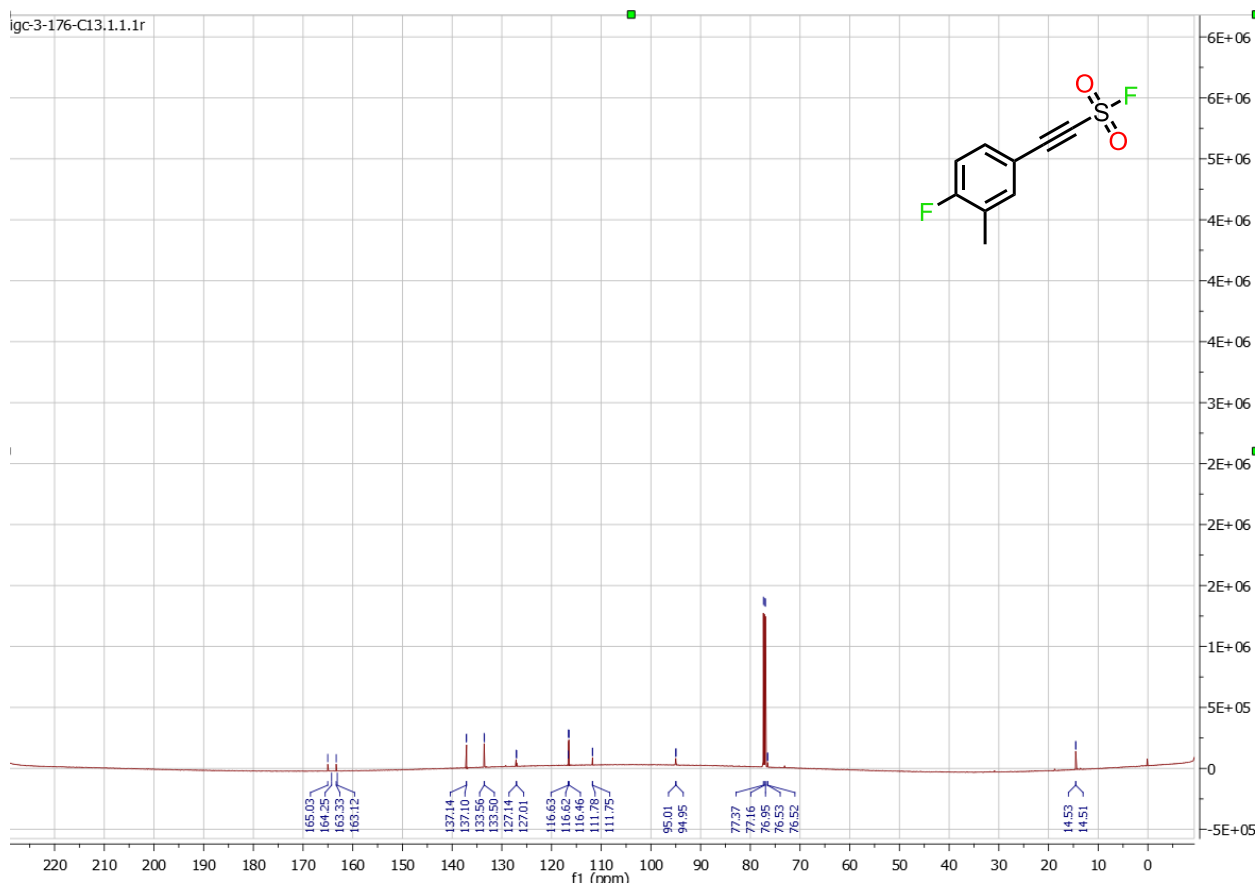



ligc-3-176-F.1.fid  
AV400 BBOF Probe, F-19 in CDCl3, CFCl3=0 ppm.

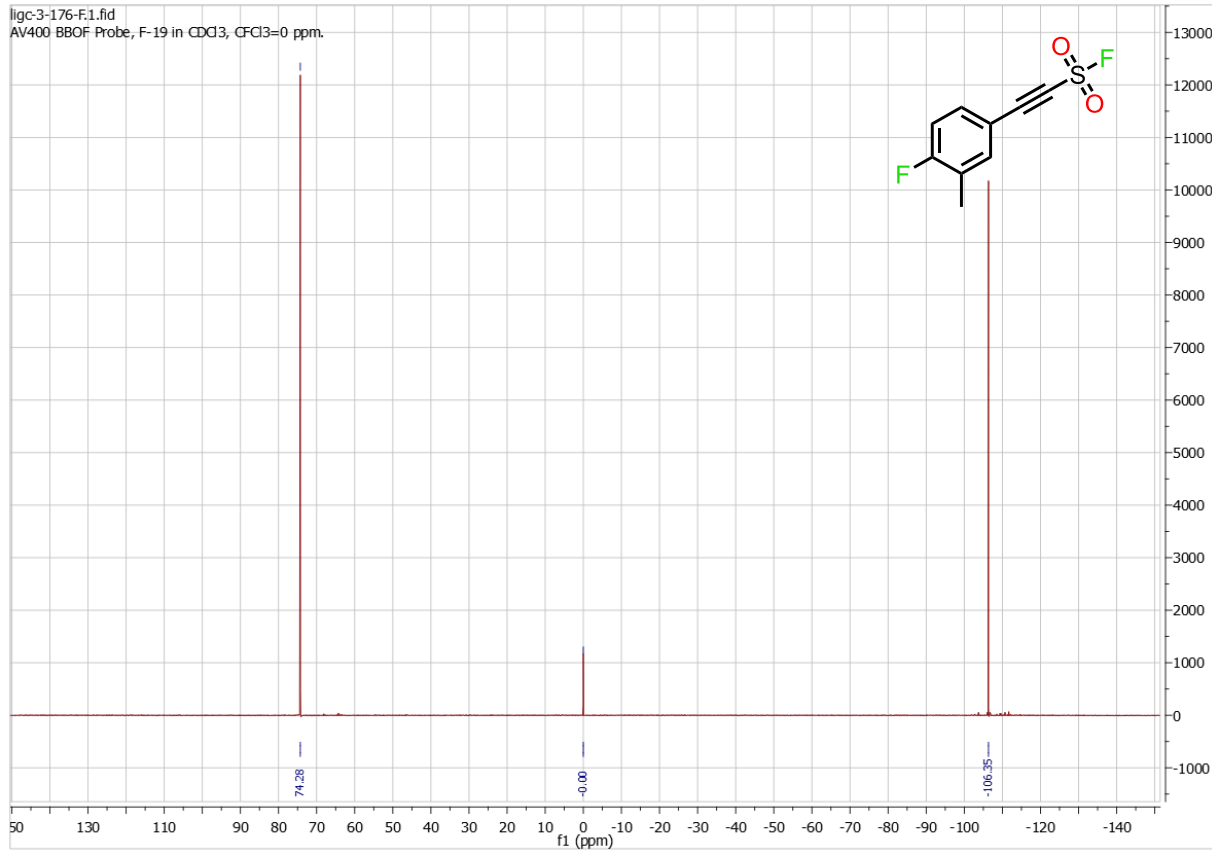

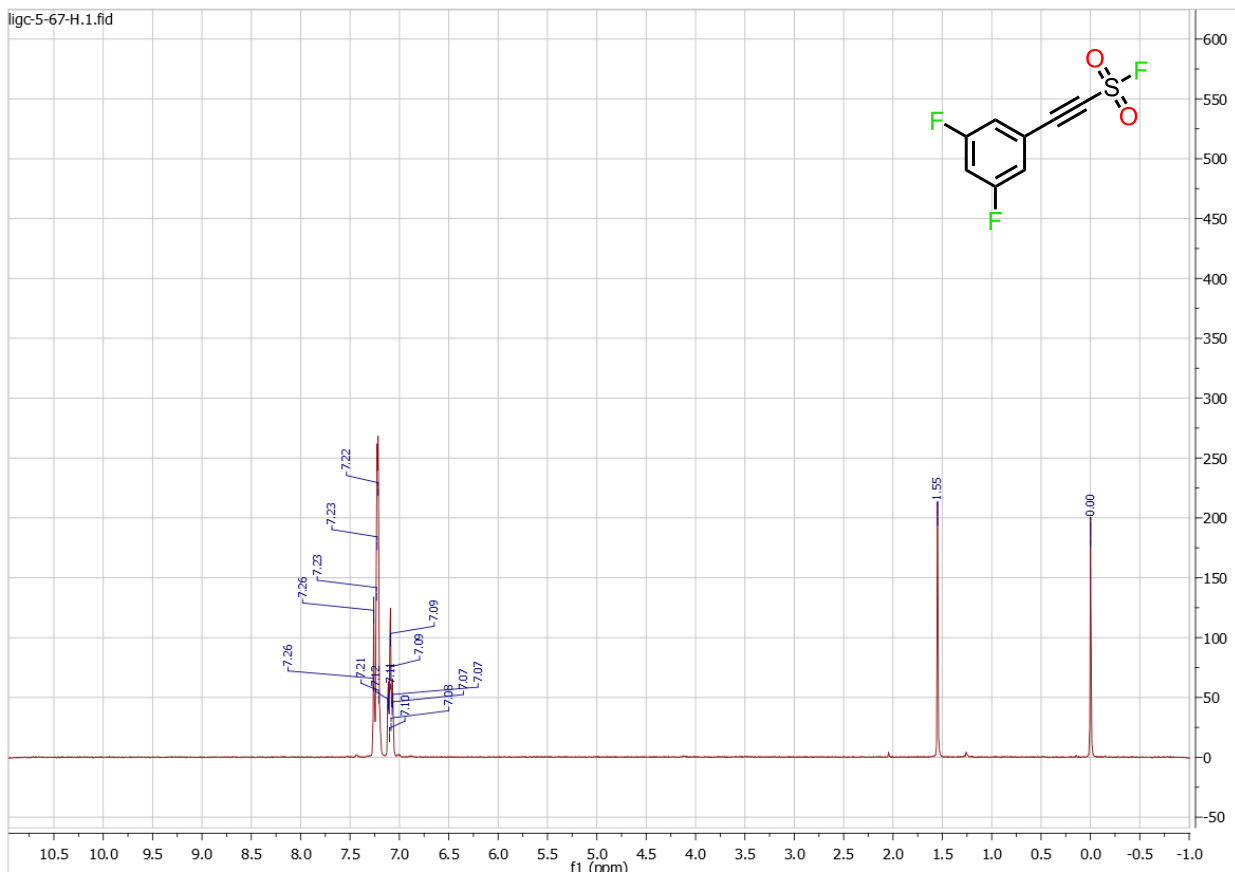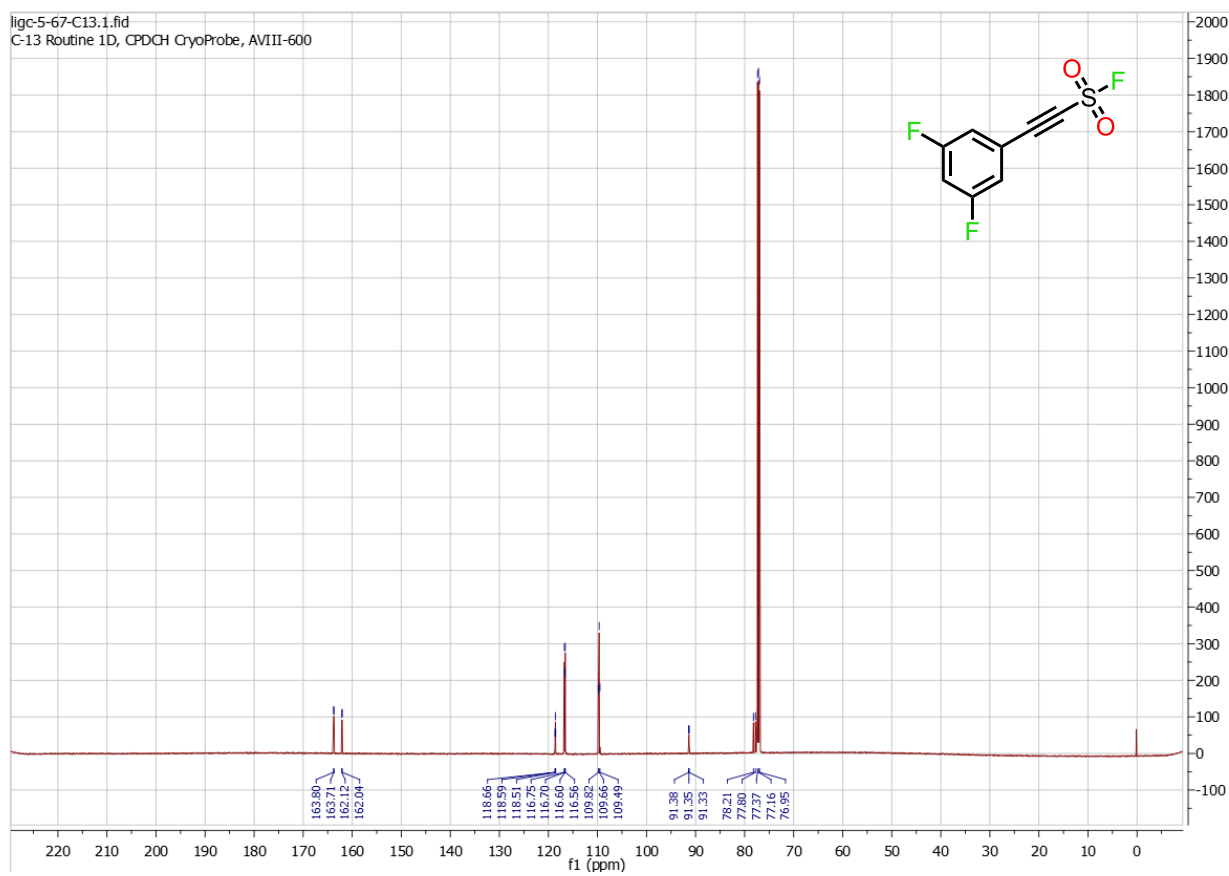

ligc-5-67-F-rere.1.fid  
F-19, CDCl<sub>3</sub>, DPX-400 QNP Probe. CF<sub>3</sub>Cl as Ref at 0 ppm.

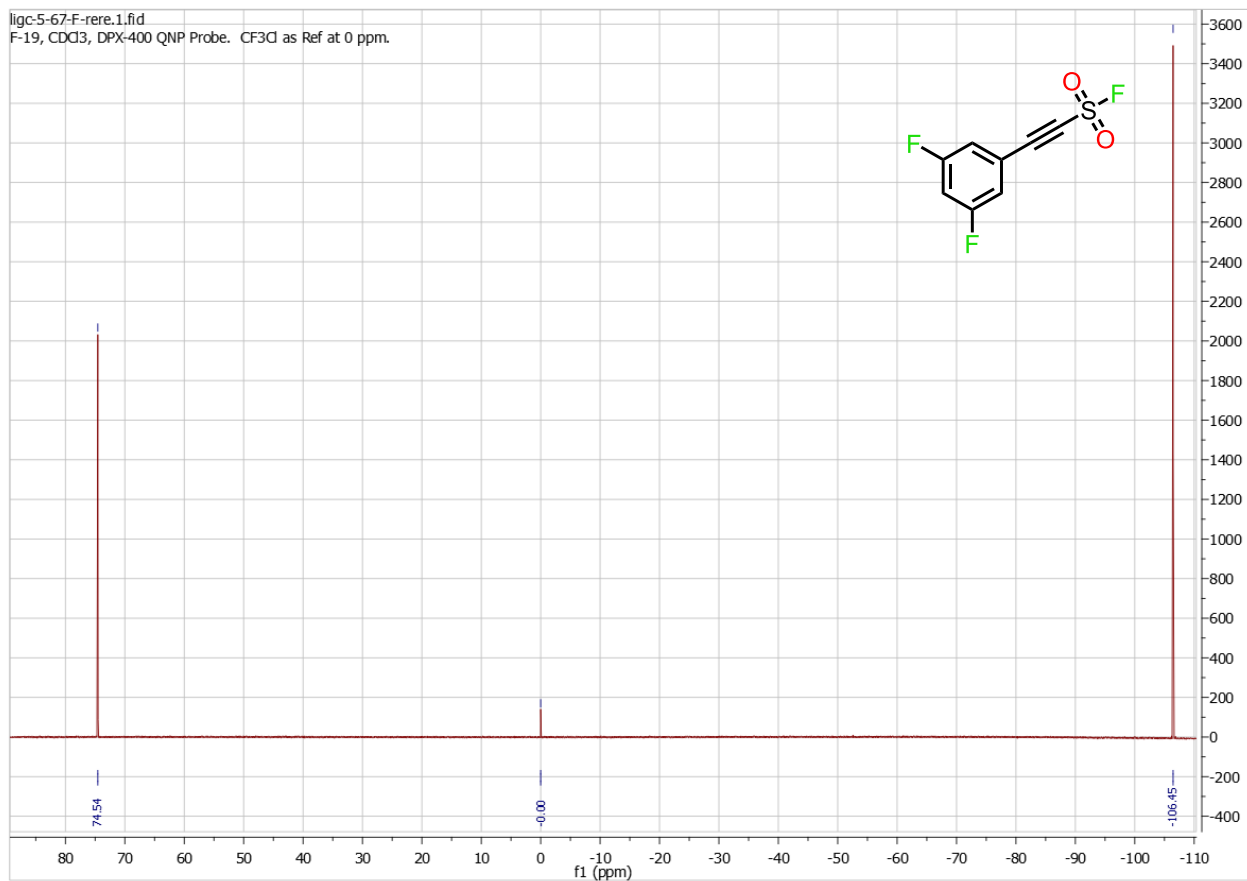

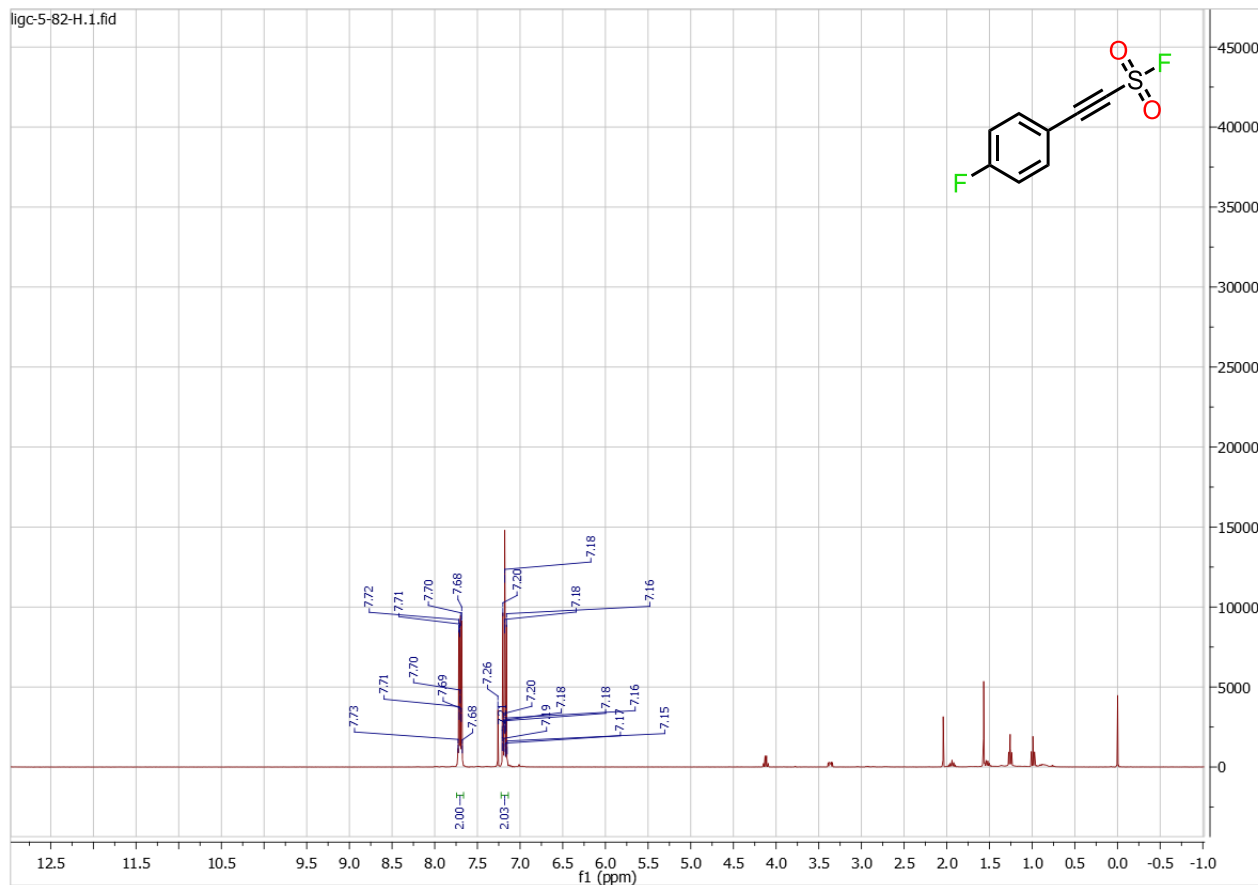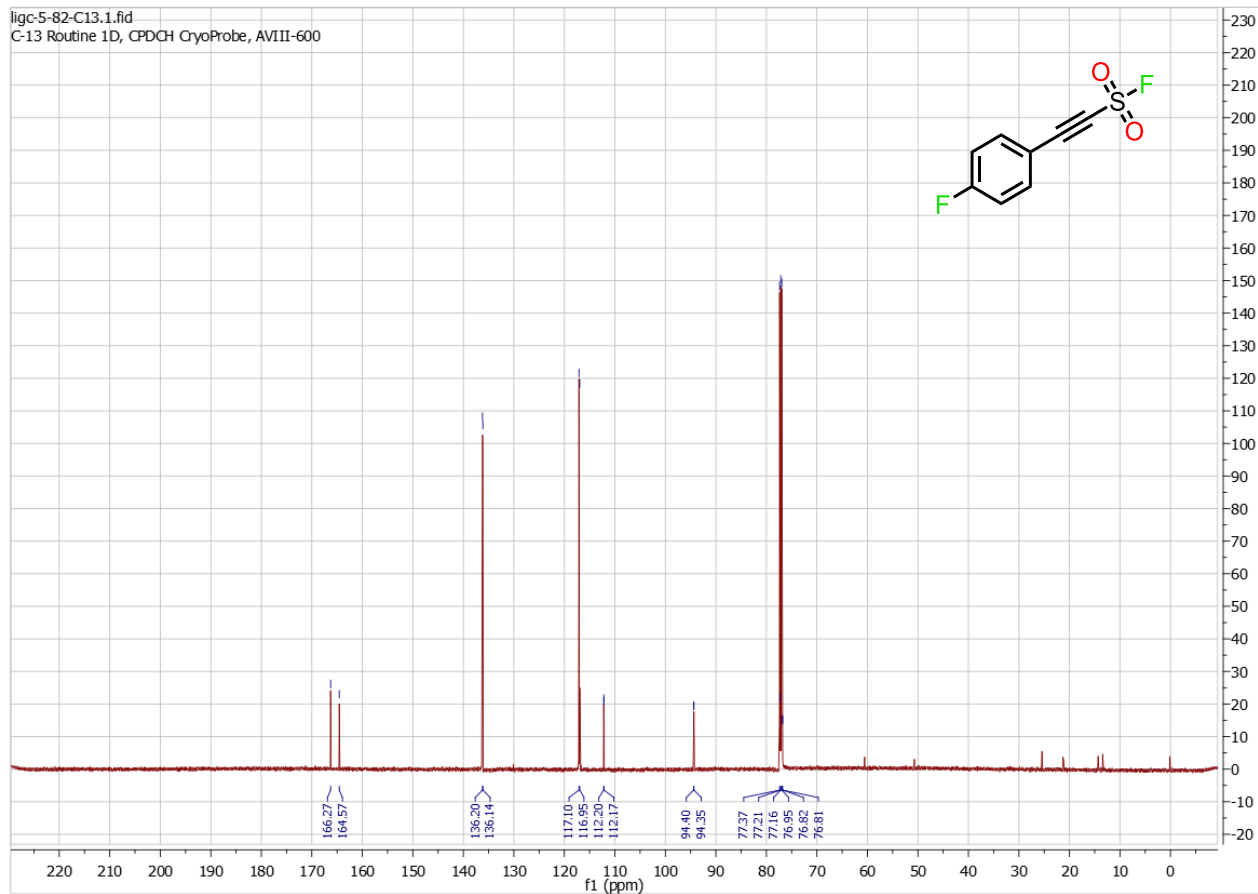

ligc-5-82-F.1.fid  
AV400 BBOF Probe, F-19 in CDCl3, CFCl3=0 ppm.

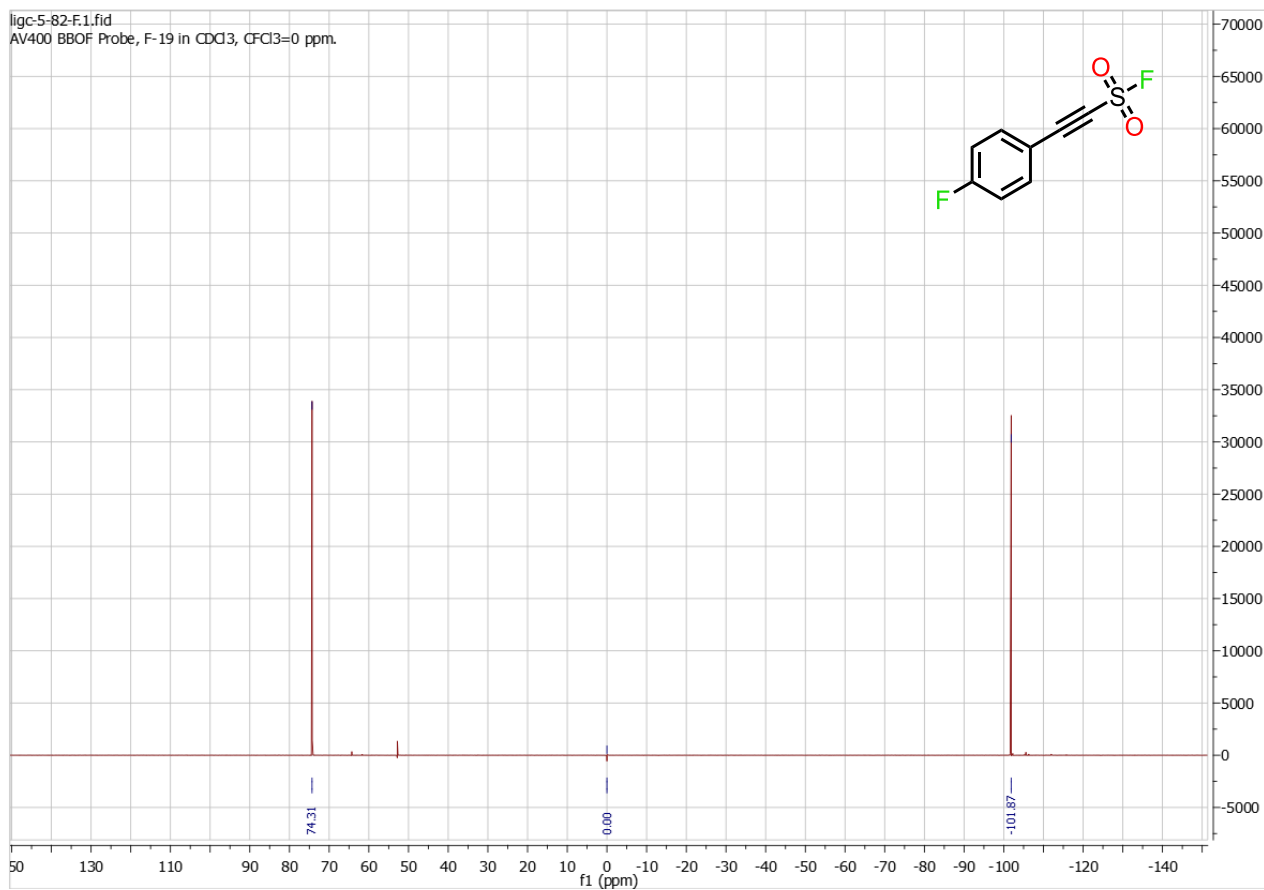

ligc-3-179-H.1.fid

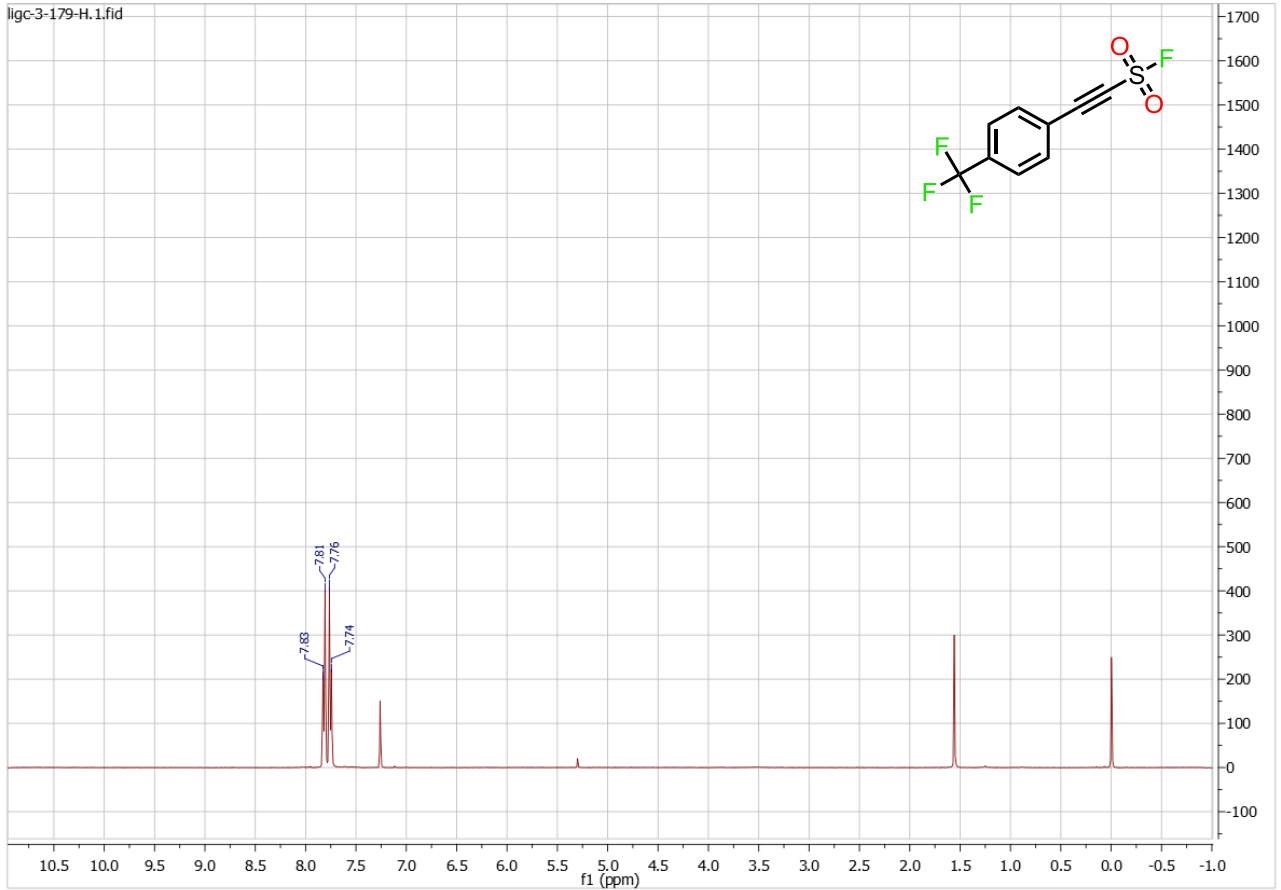

ligc-3-179-C13.1.fid

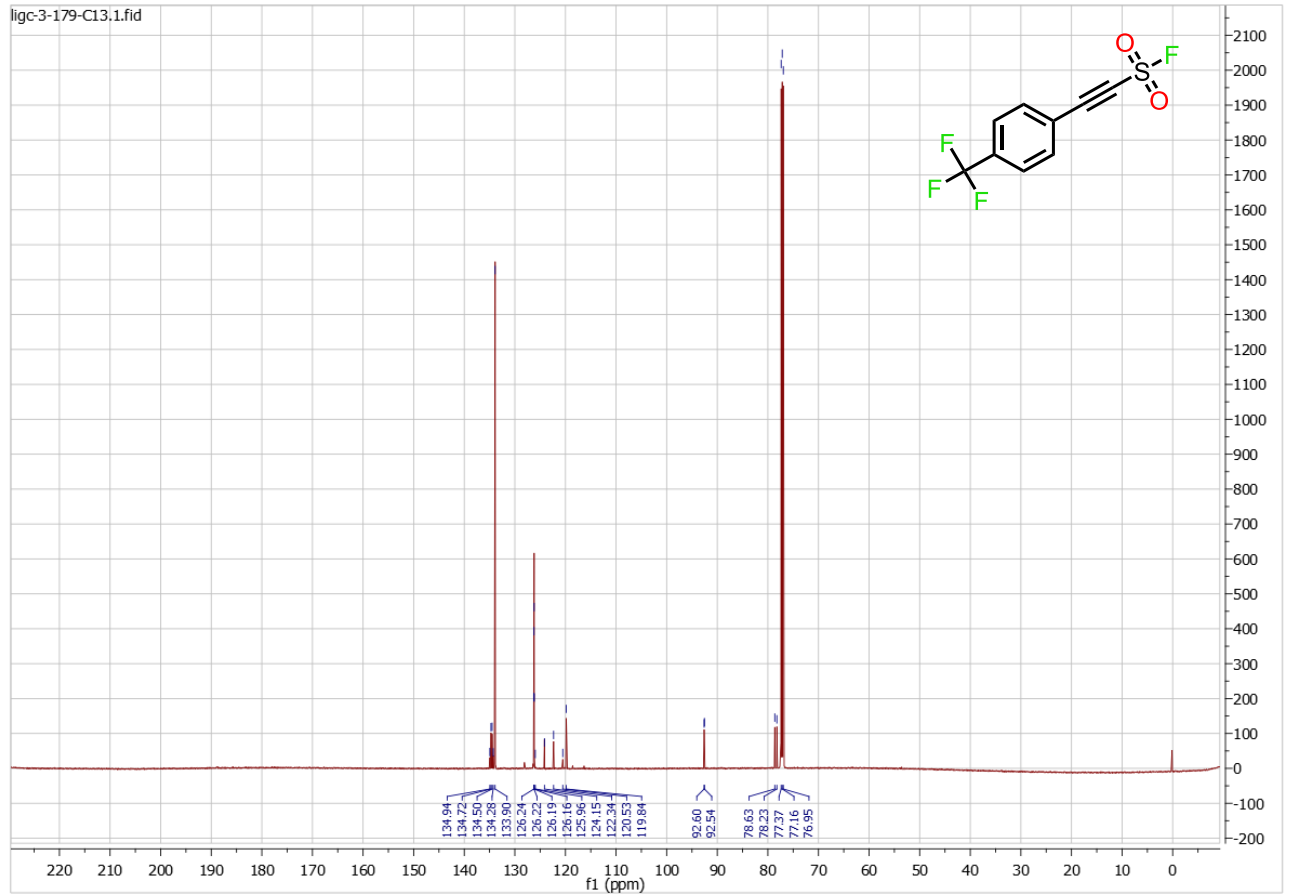

ligc-3-179-F1.fid  
F-19, CDCl3, DPX-400 QNP Probe. CF3Cl as Ref at 0 ppm.

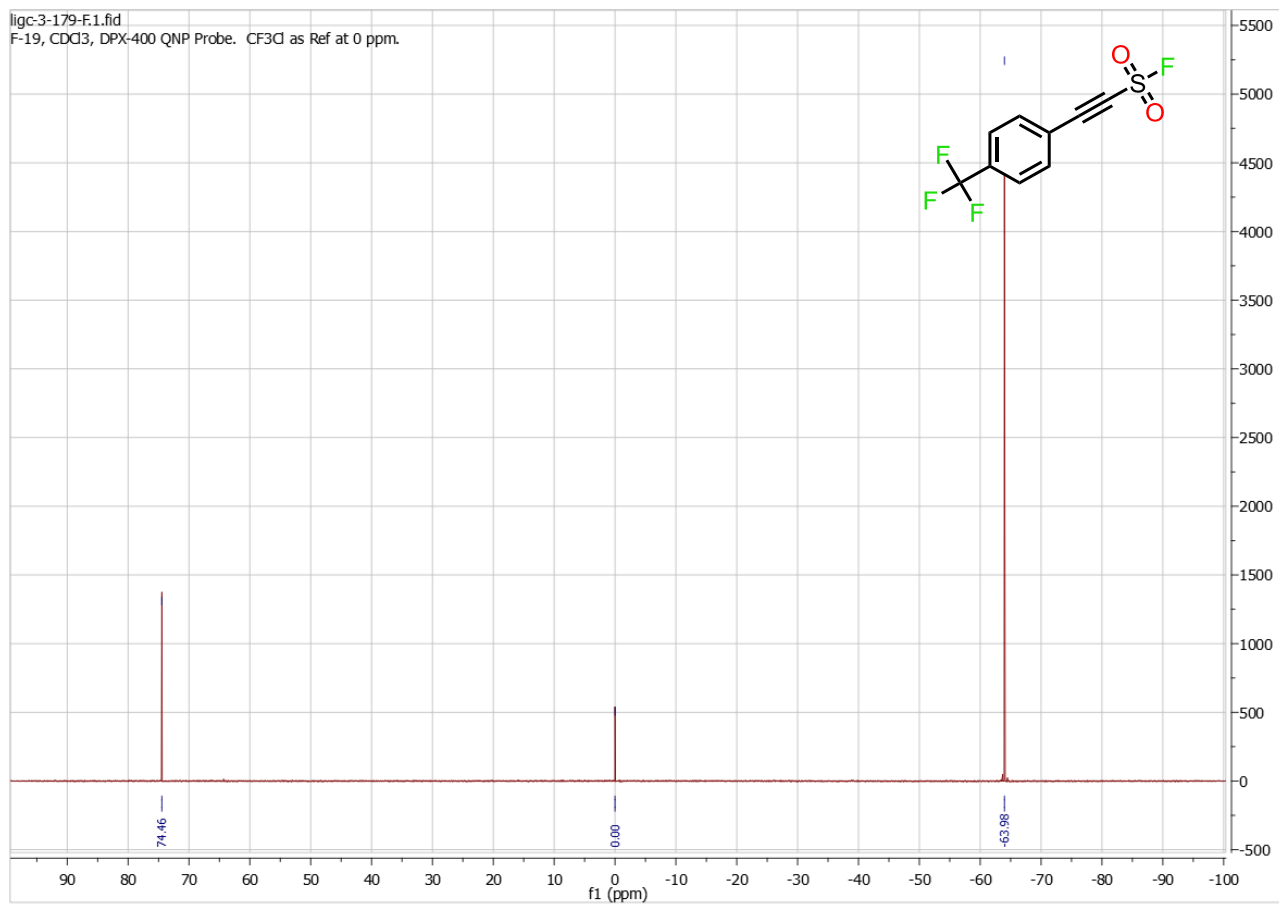

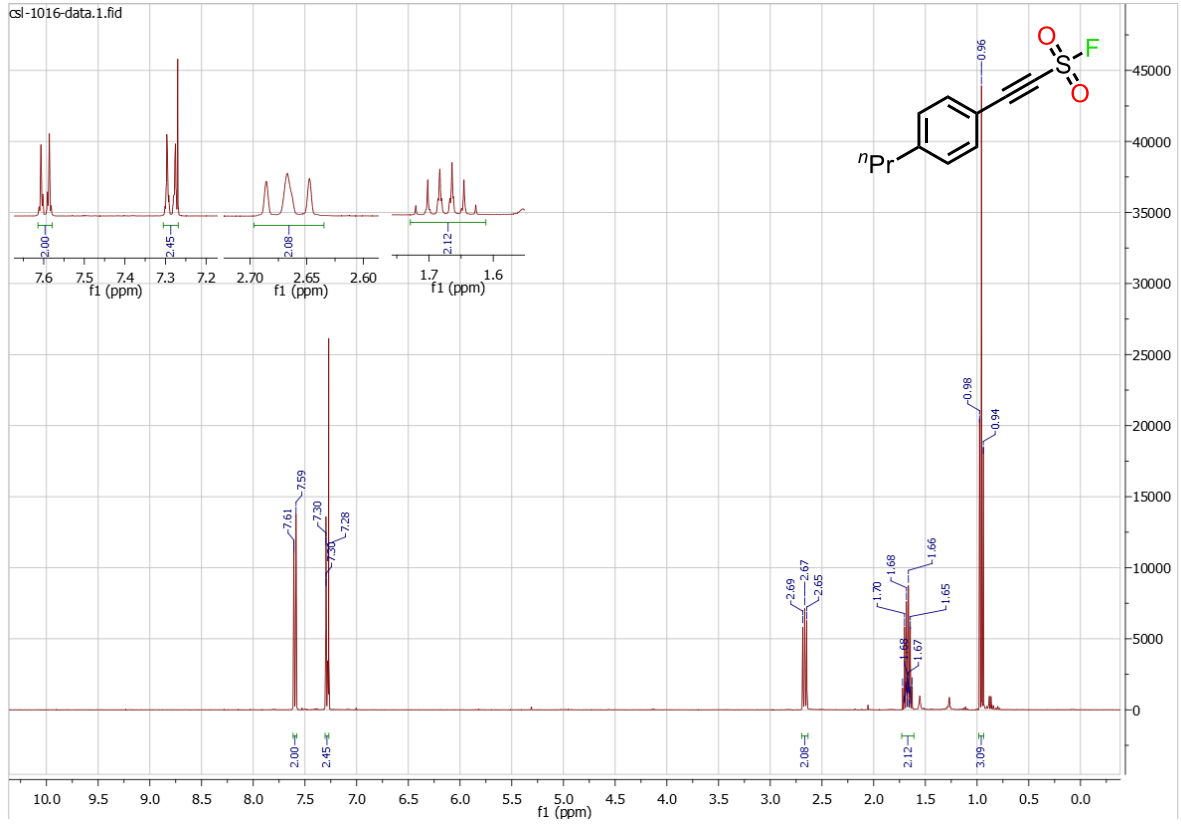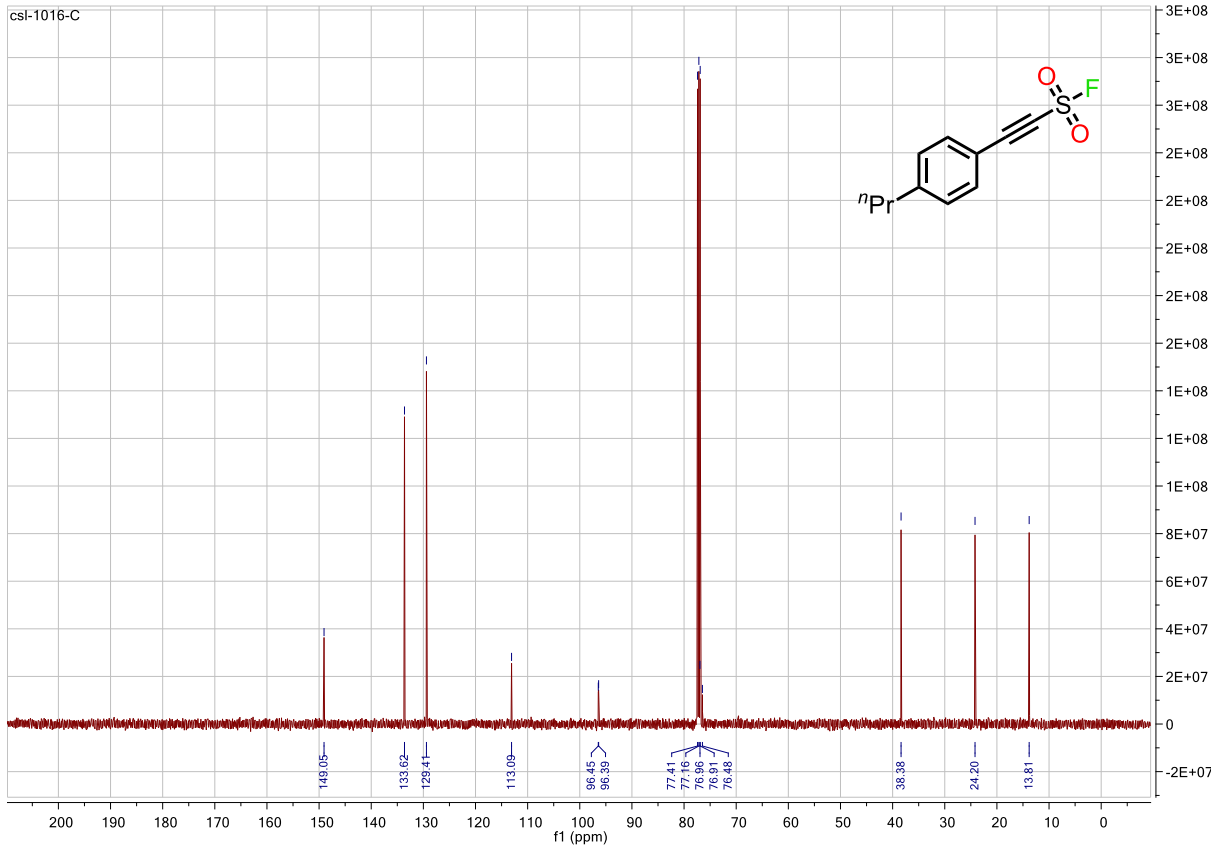



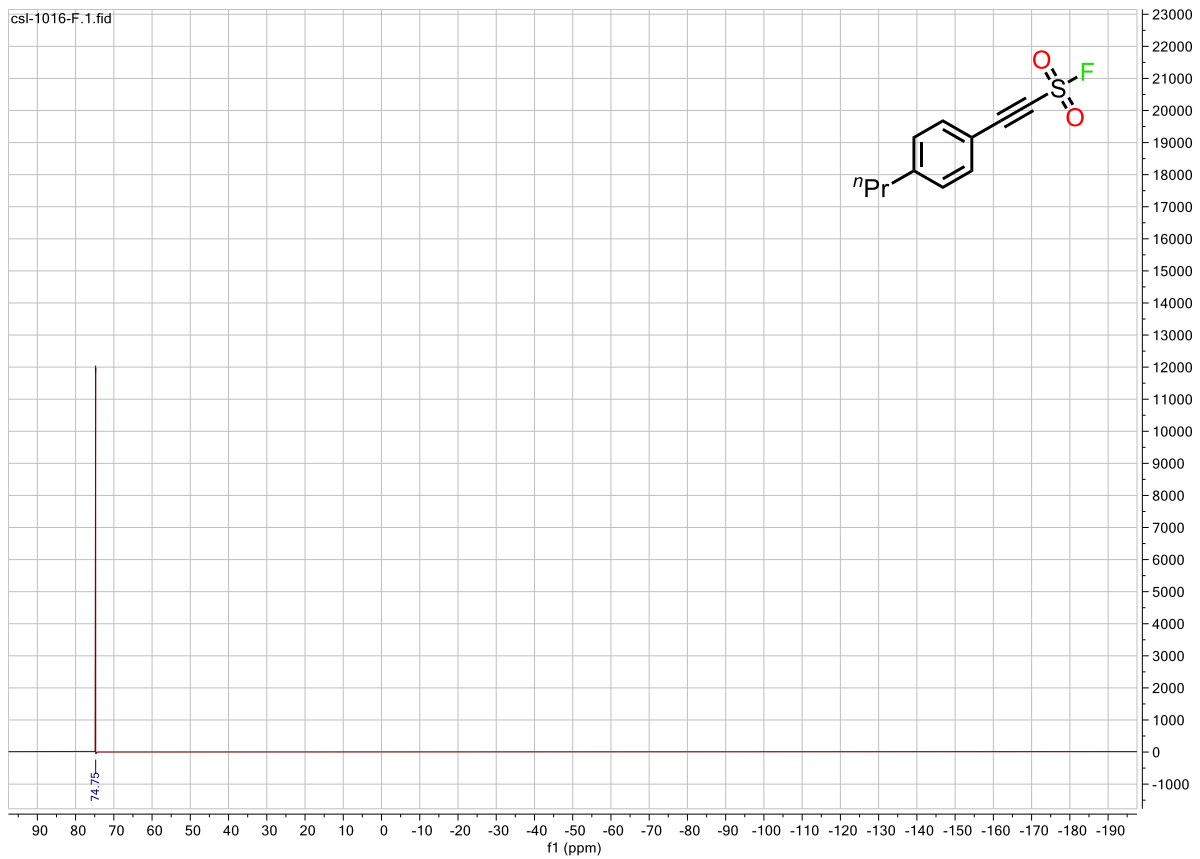

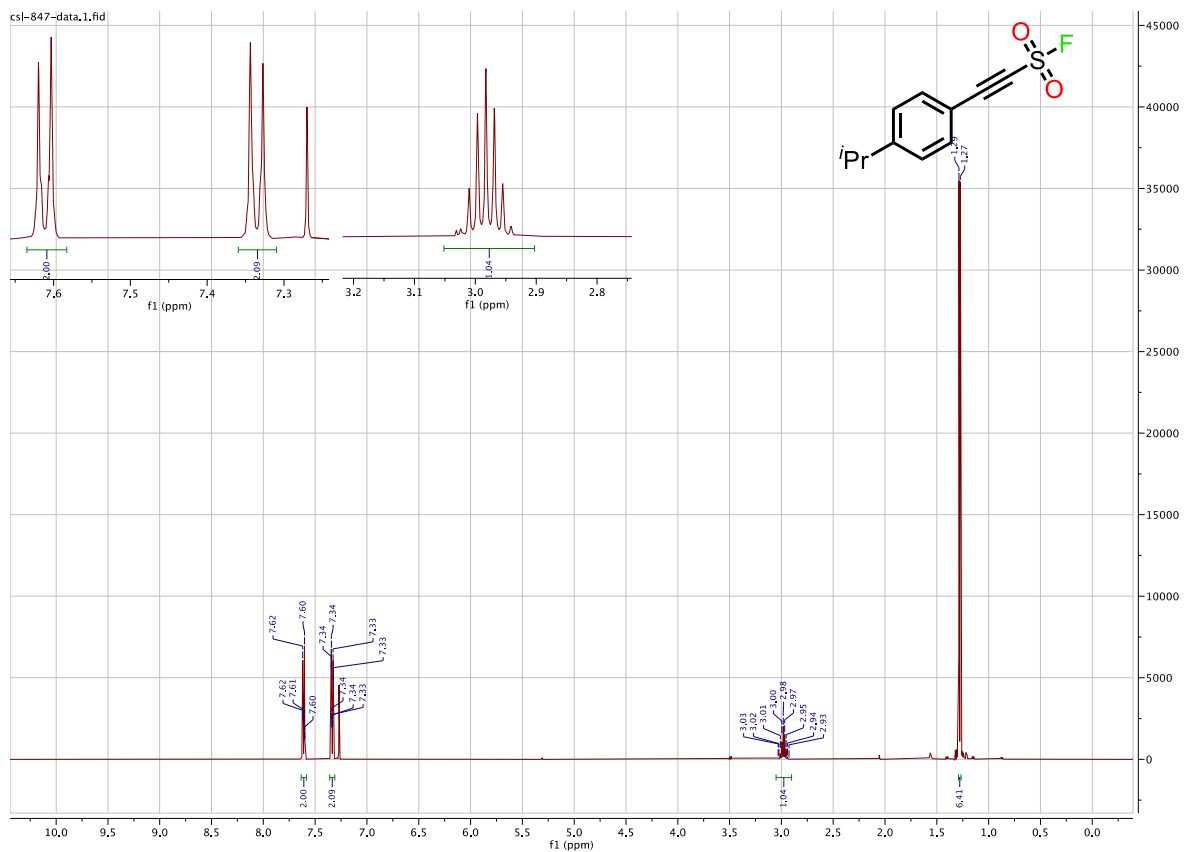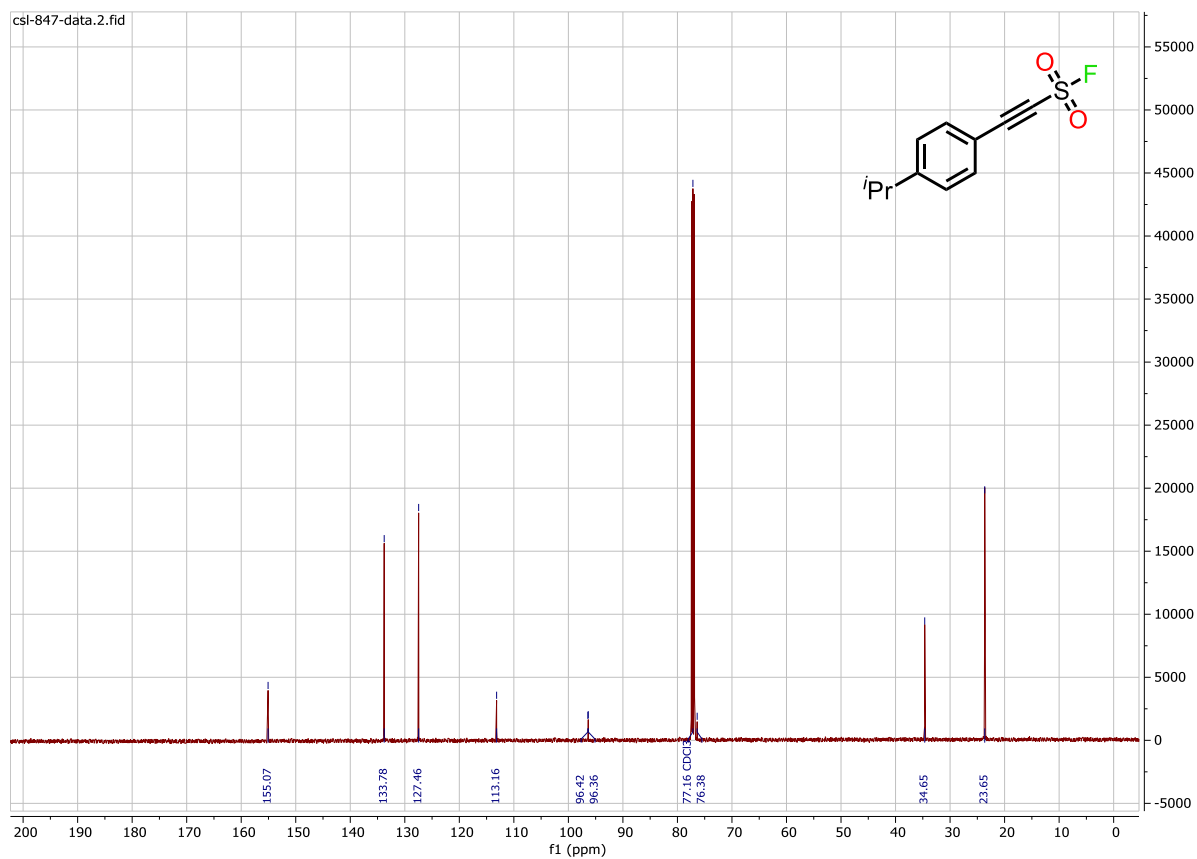

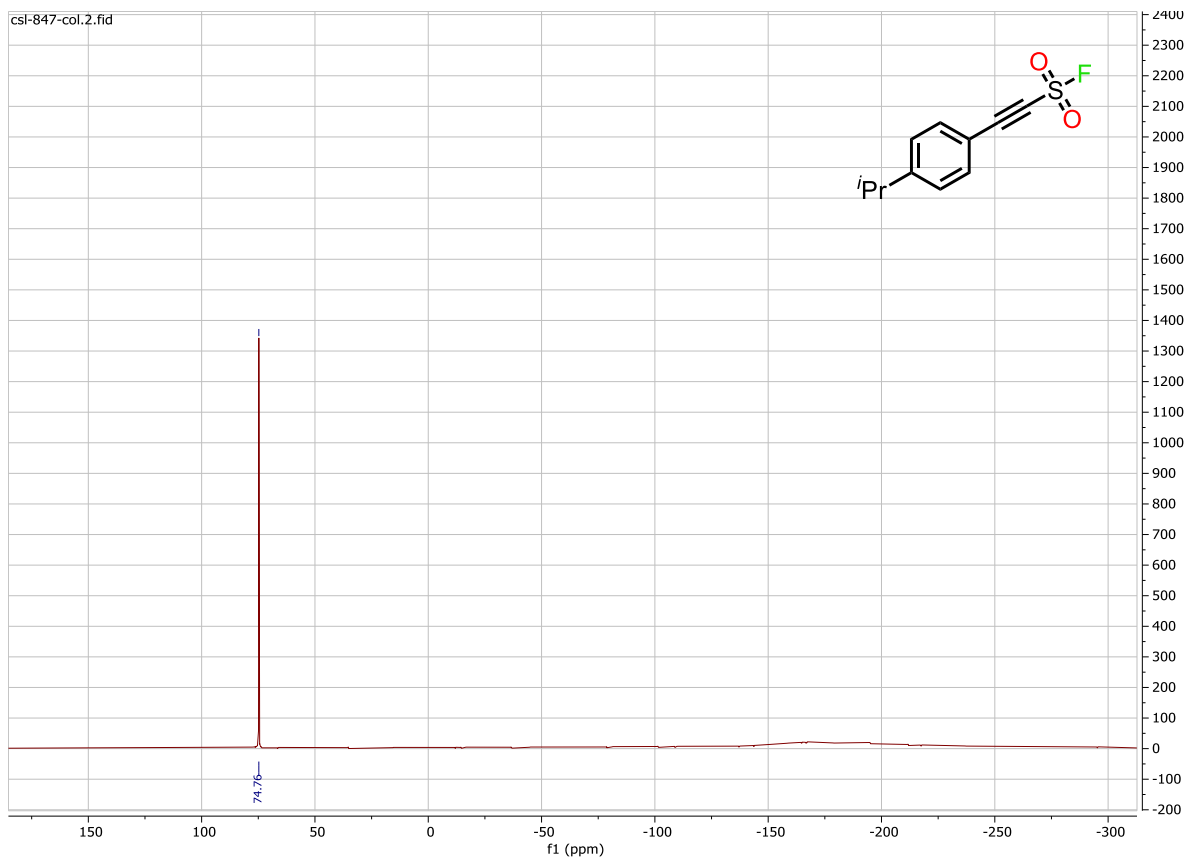

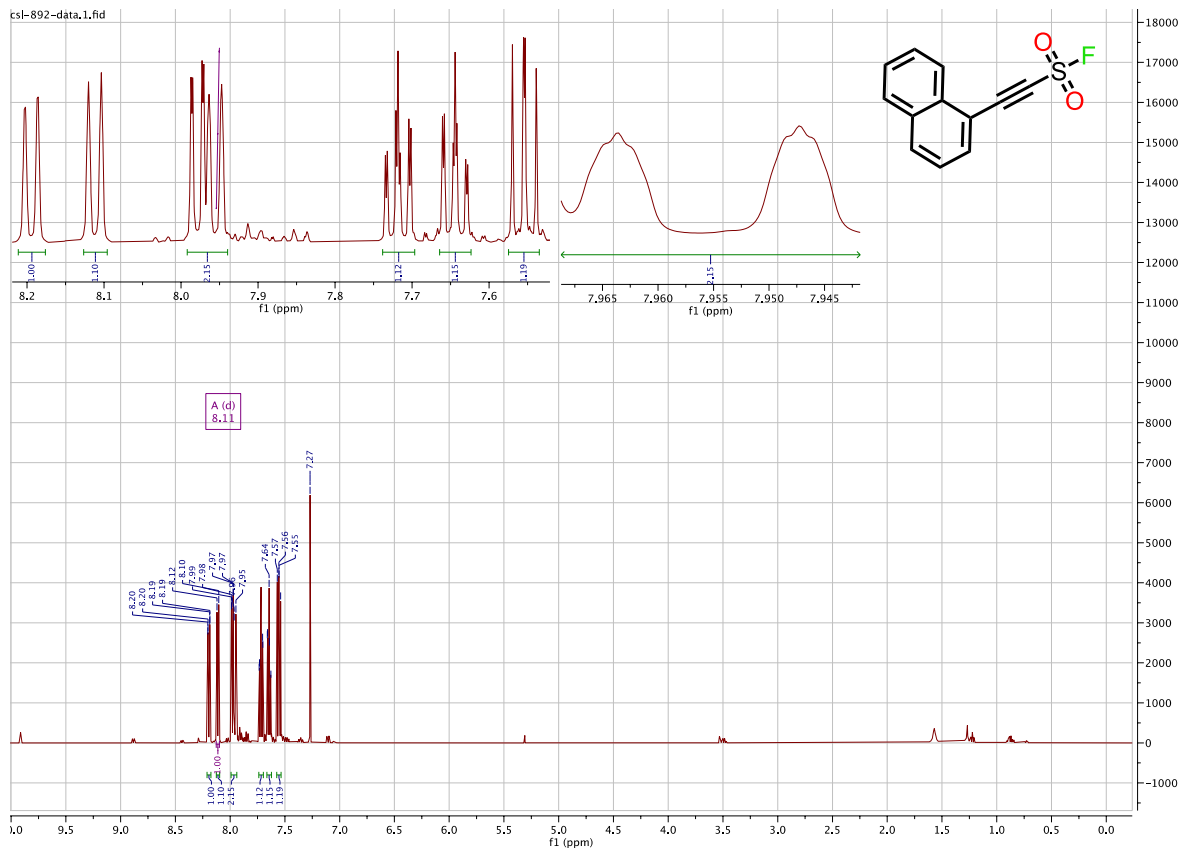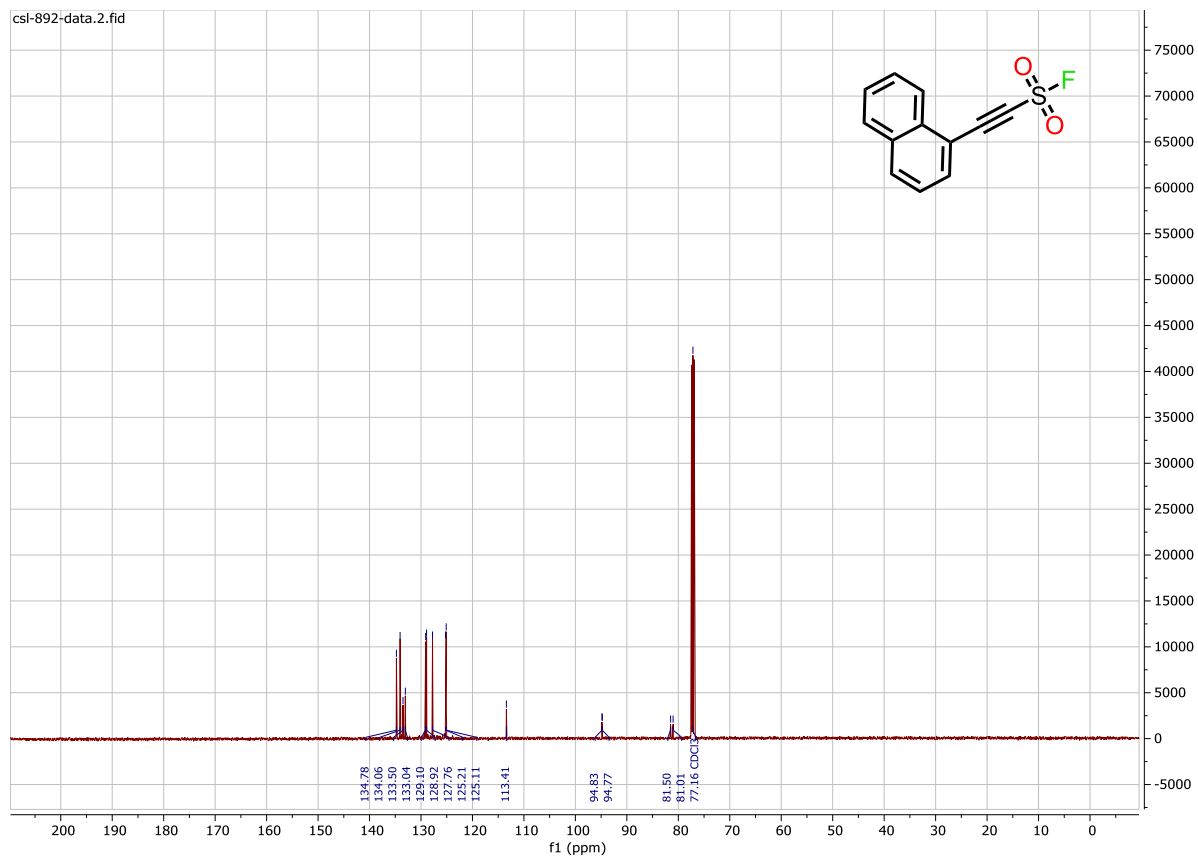

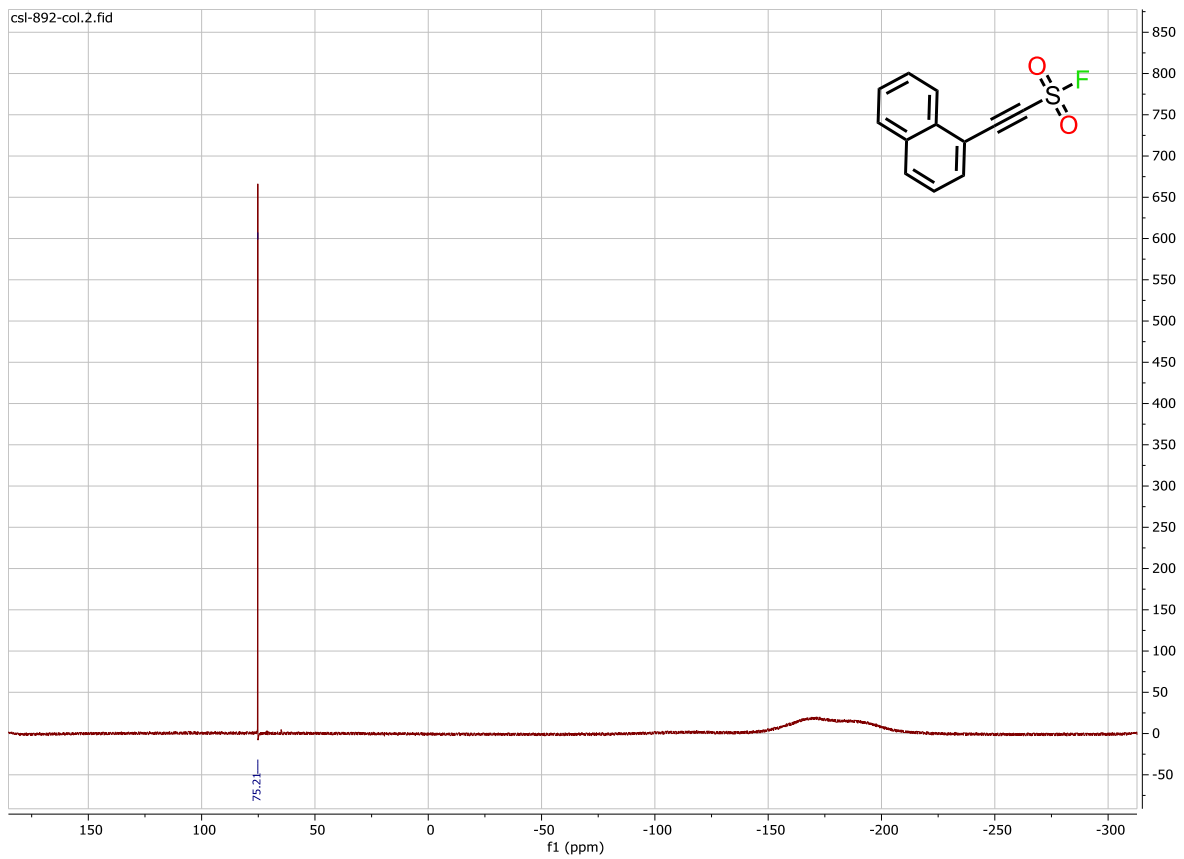

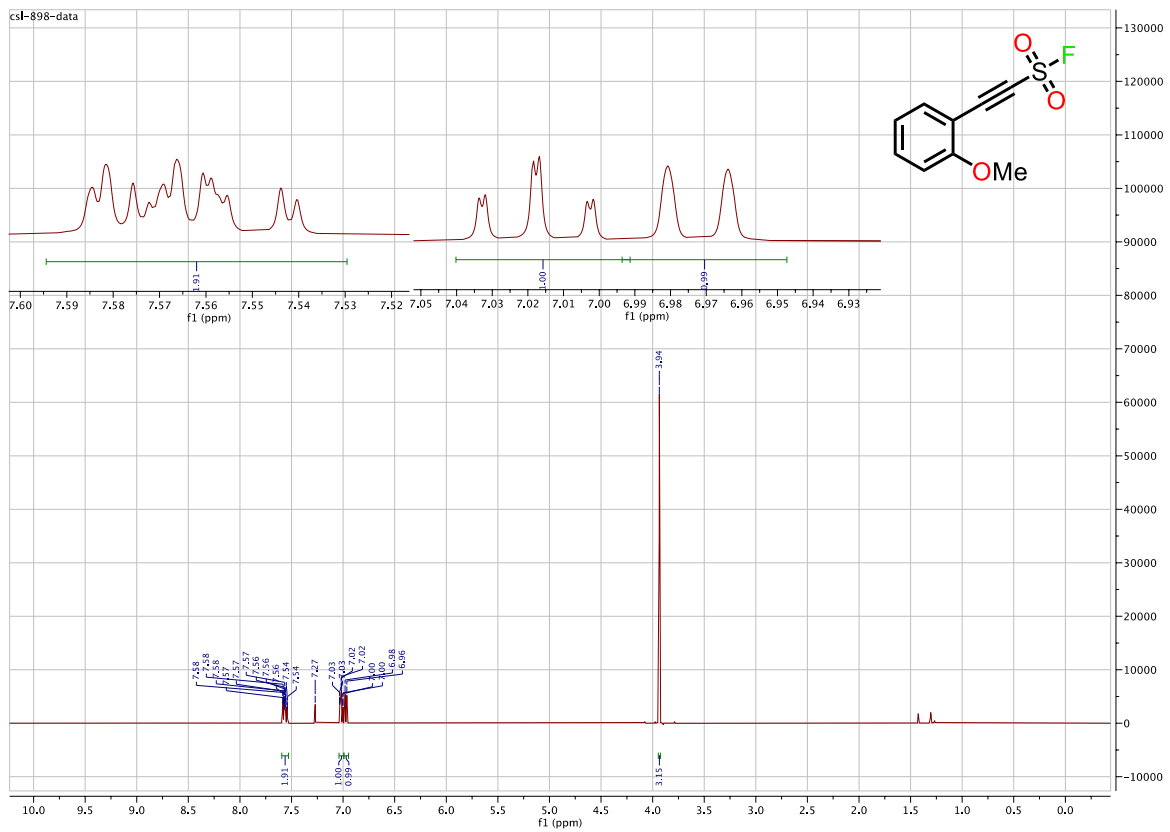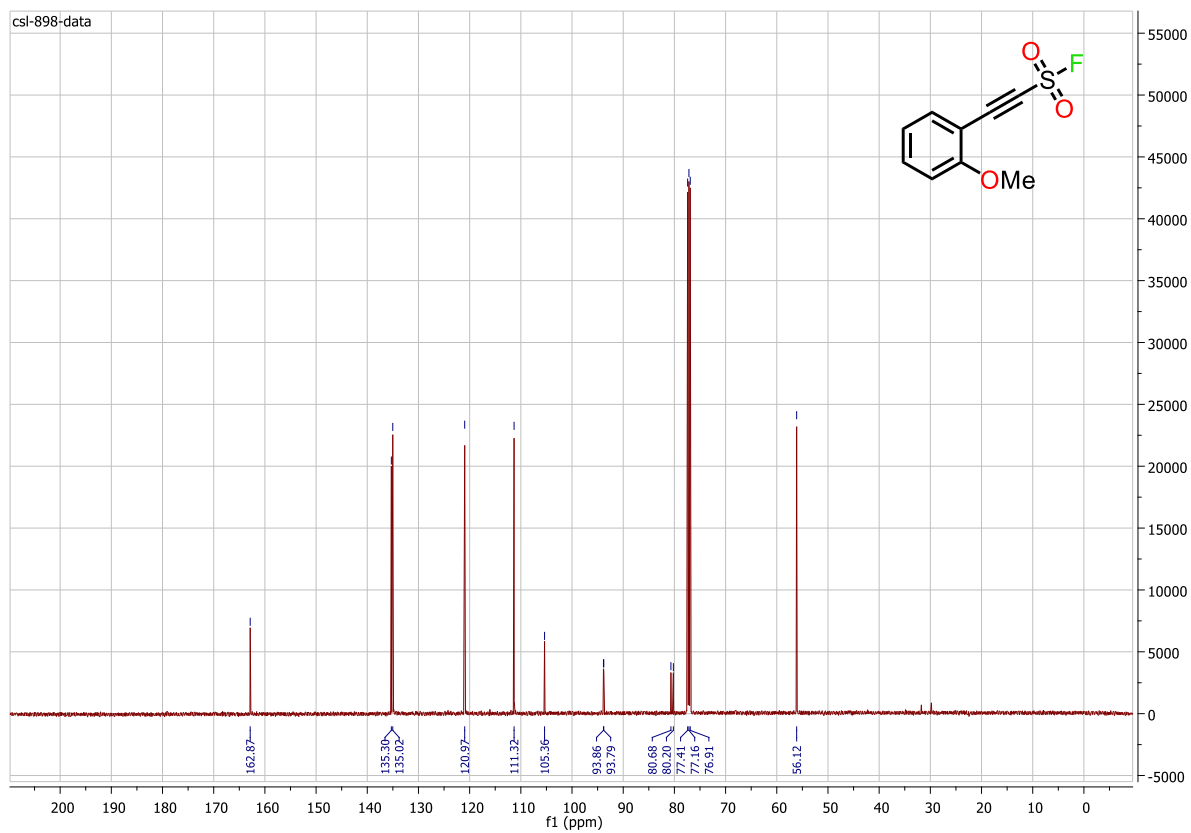

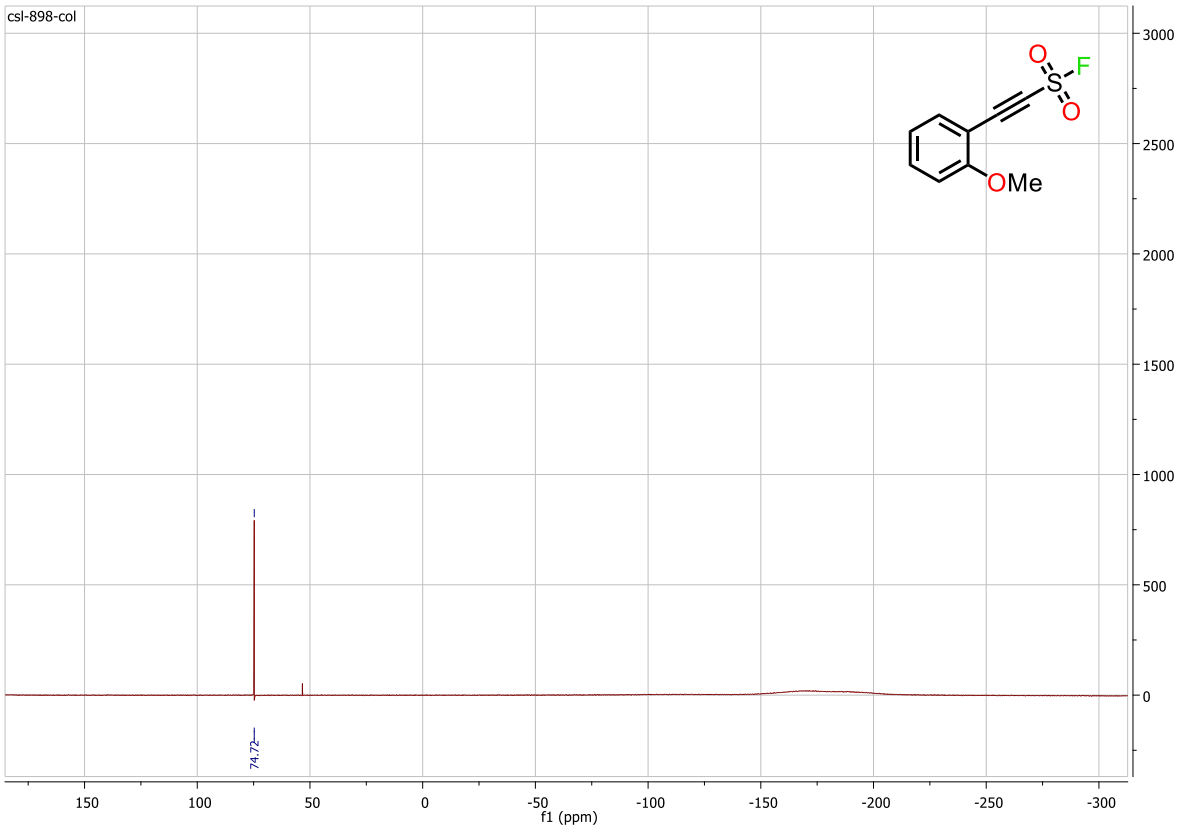

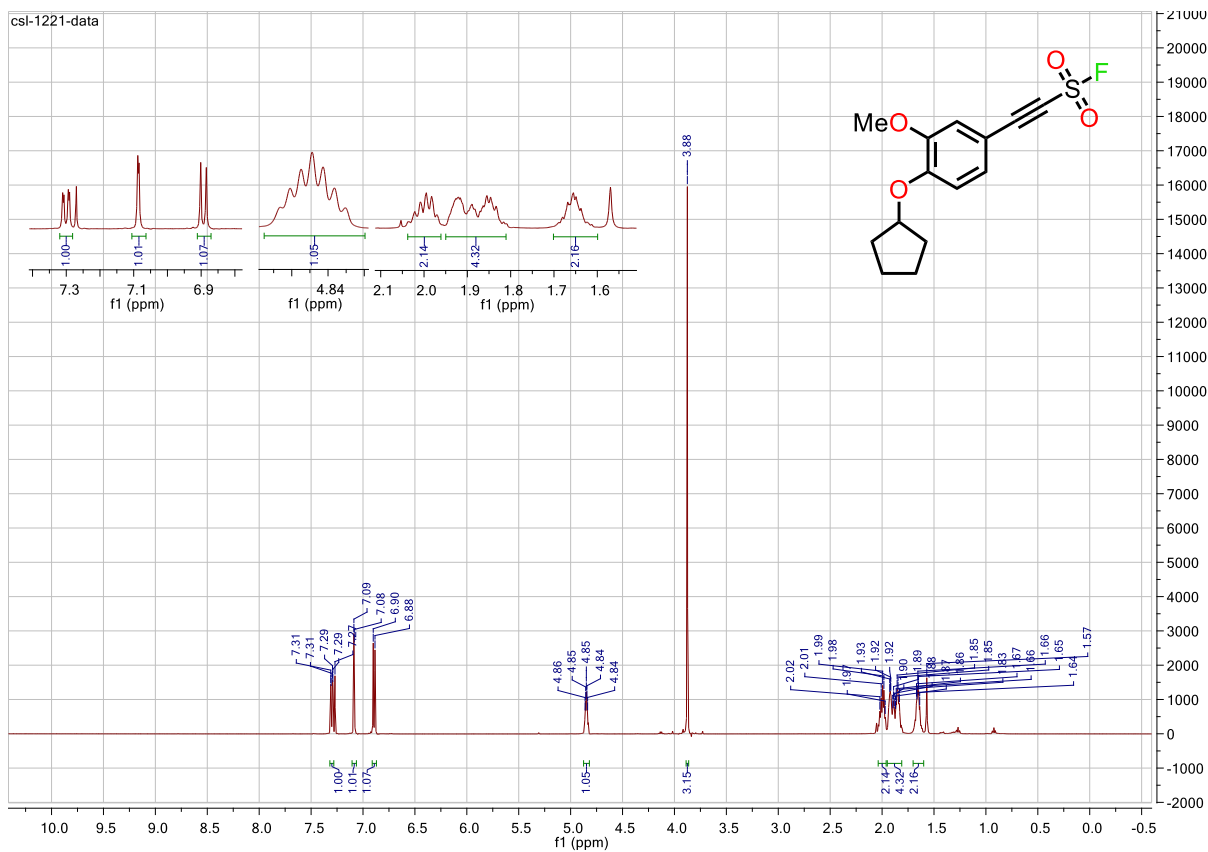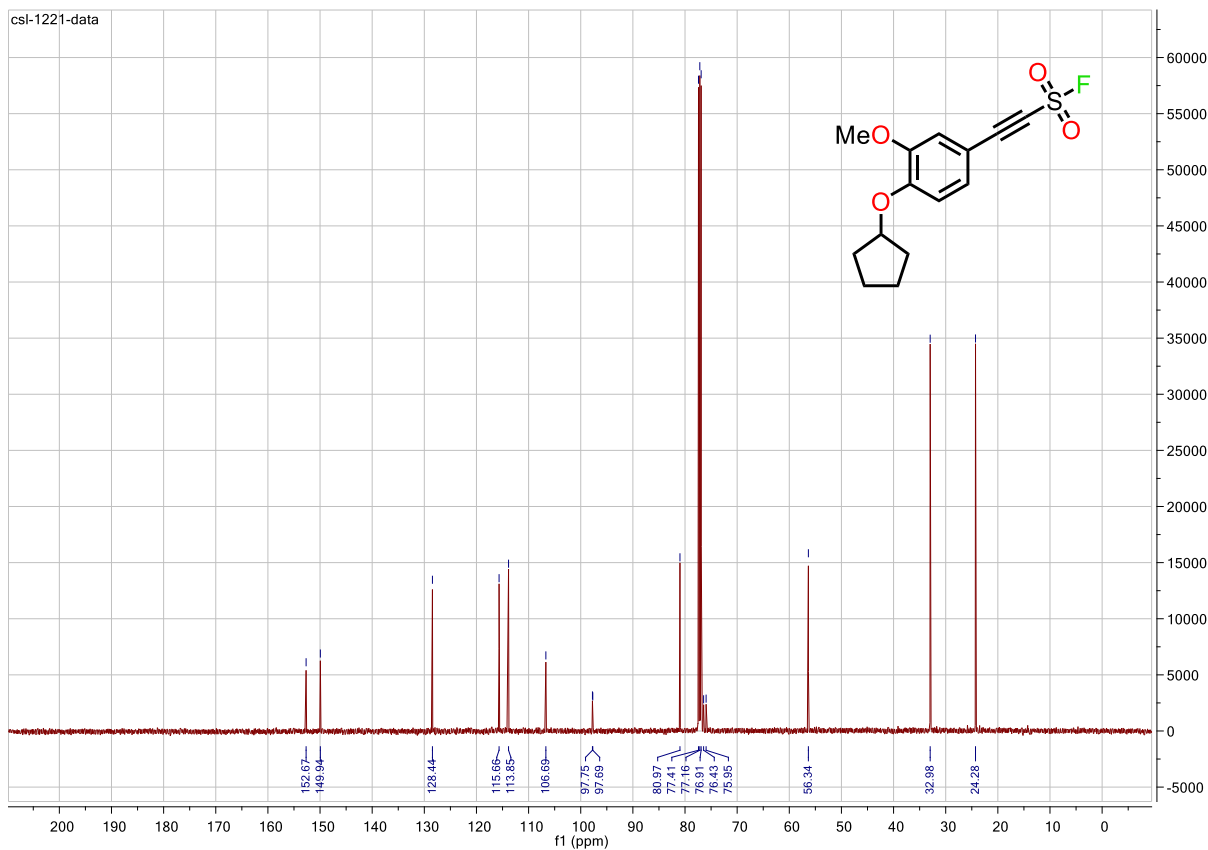



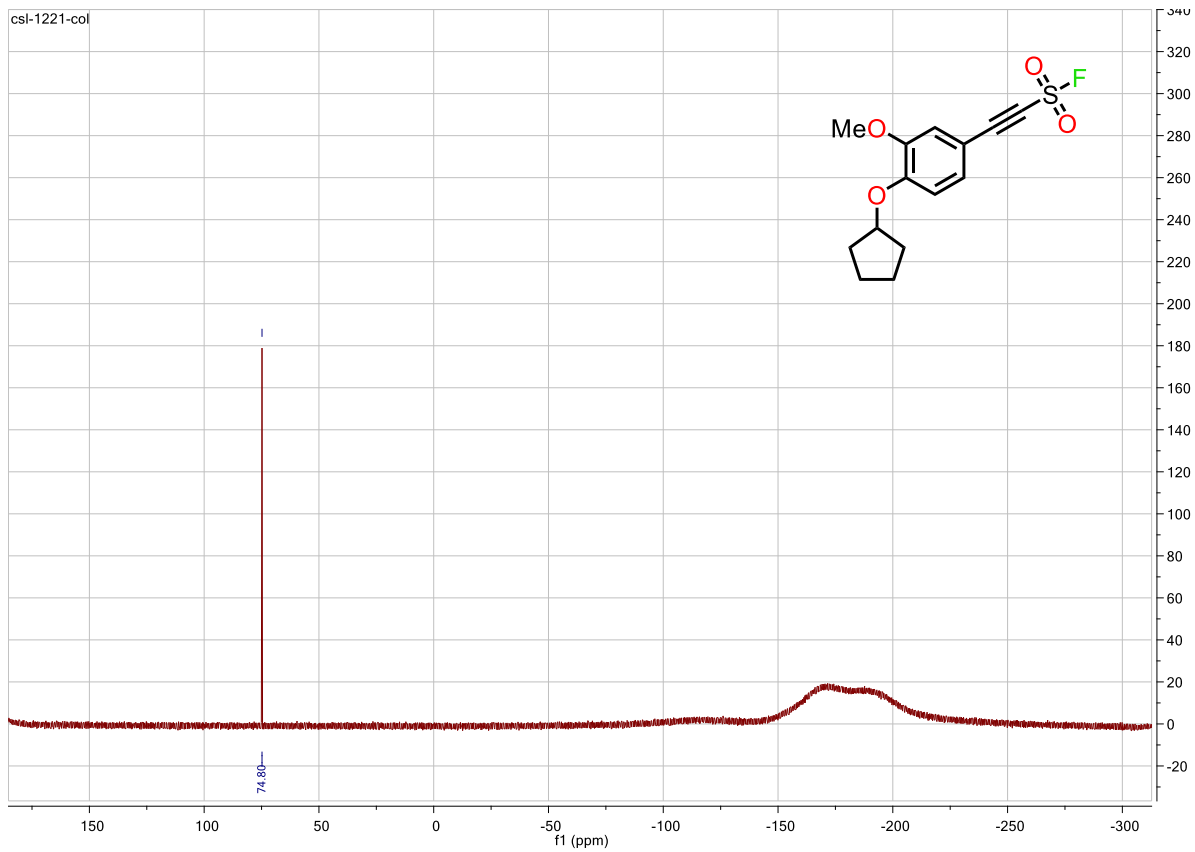

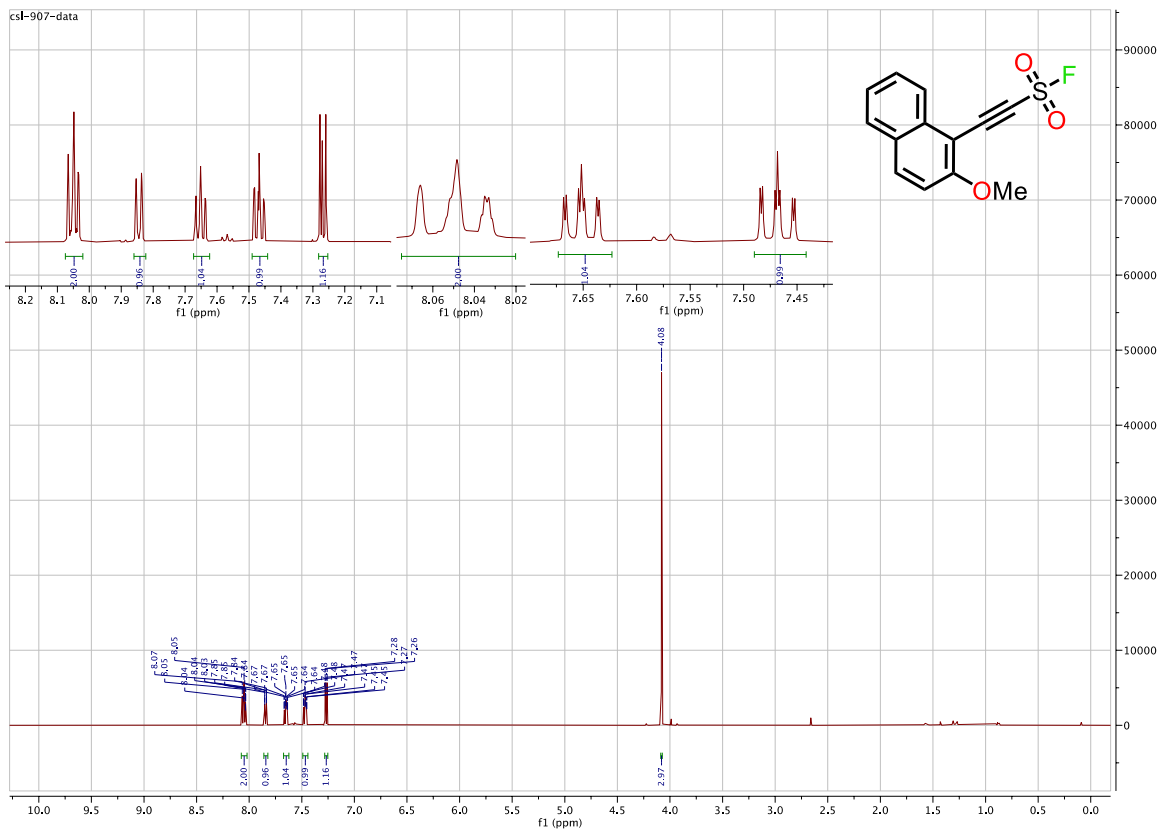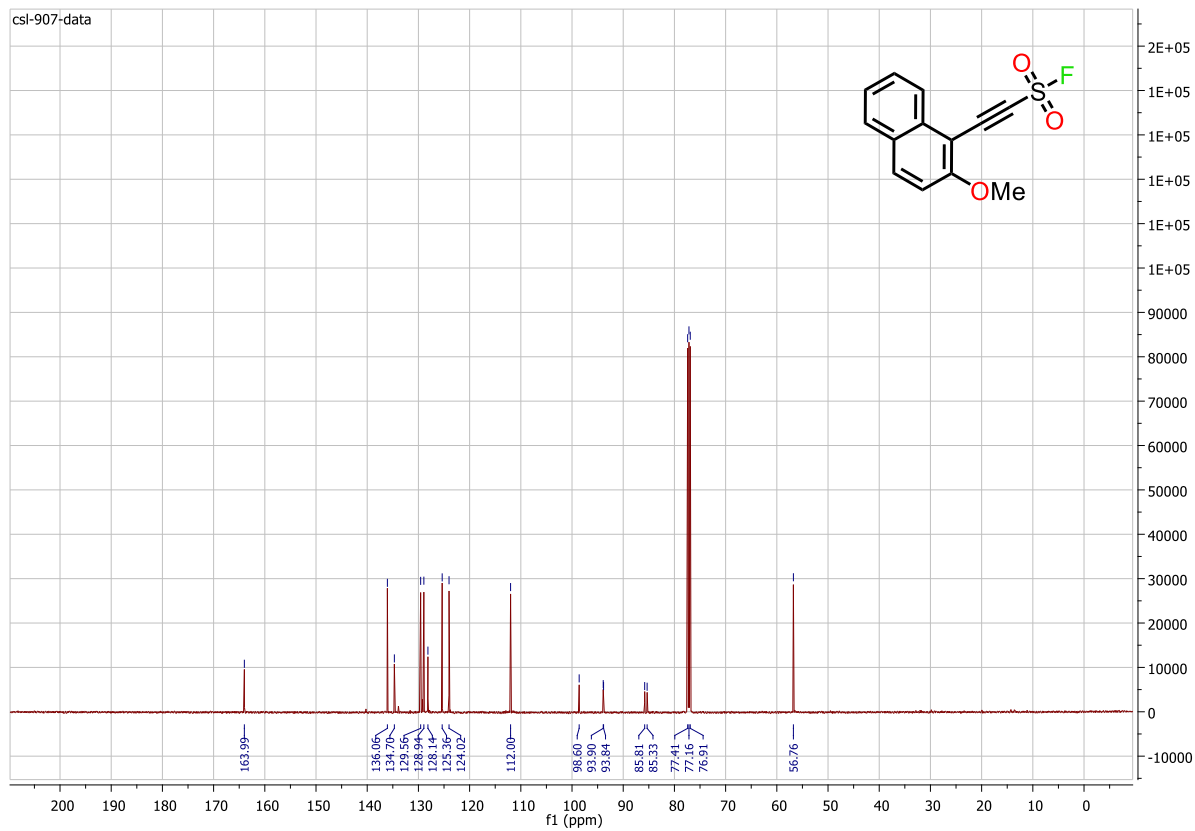

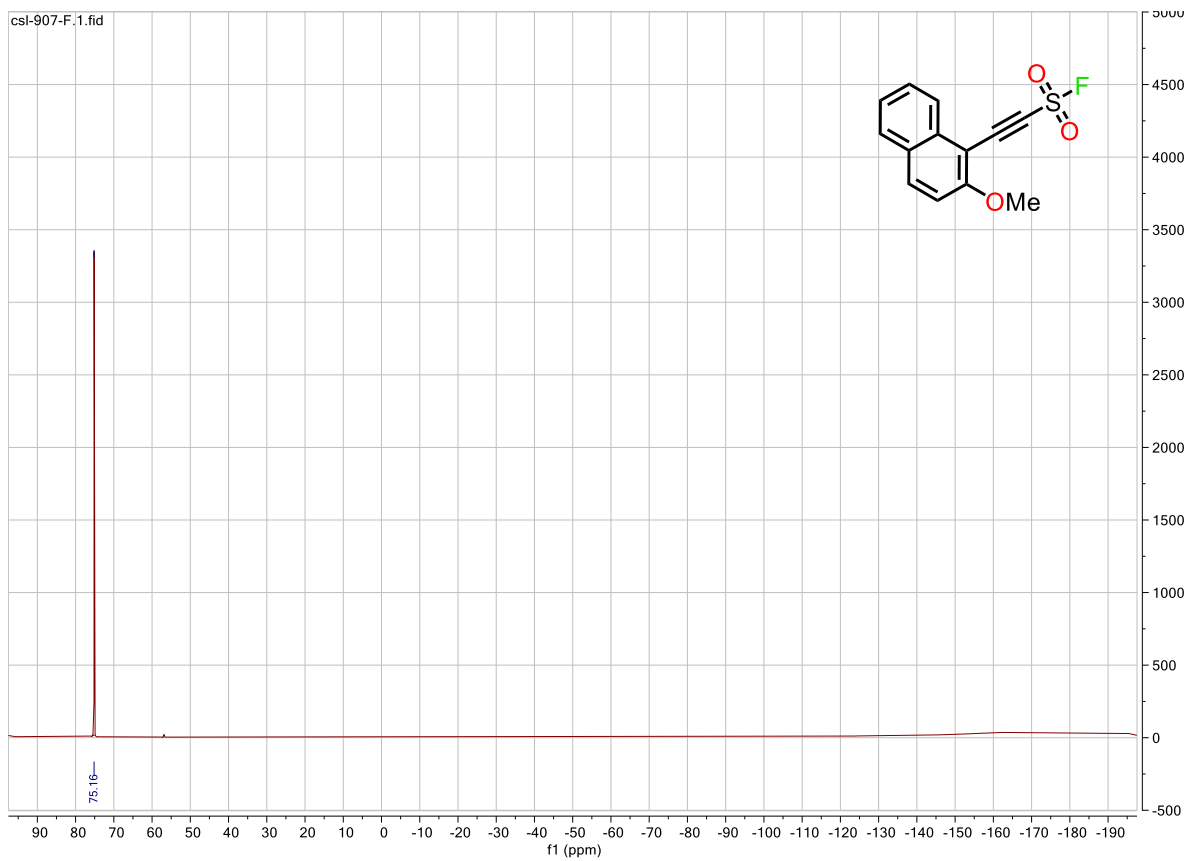

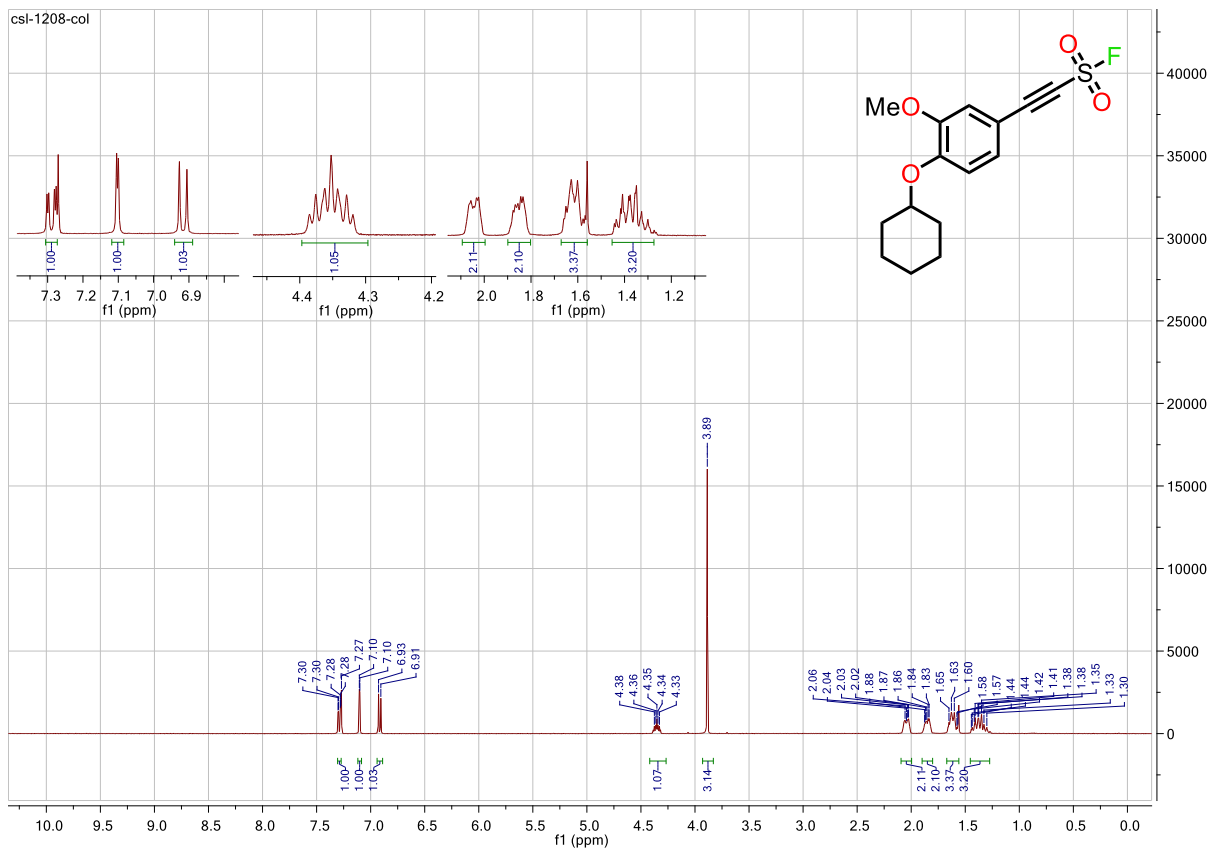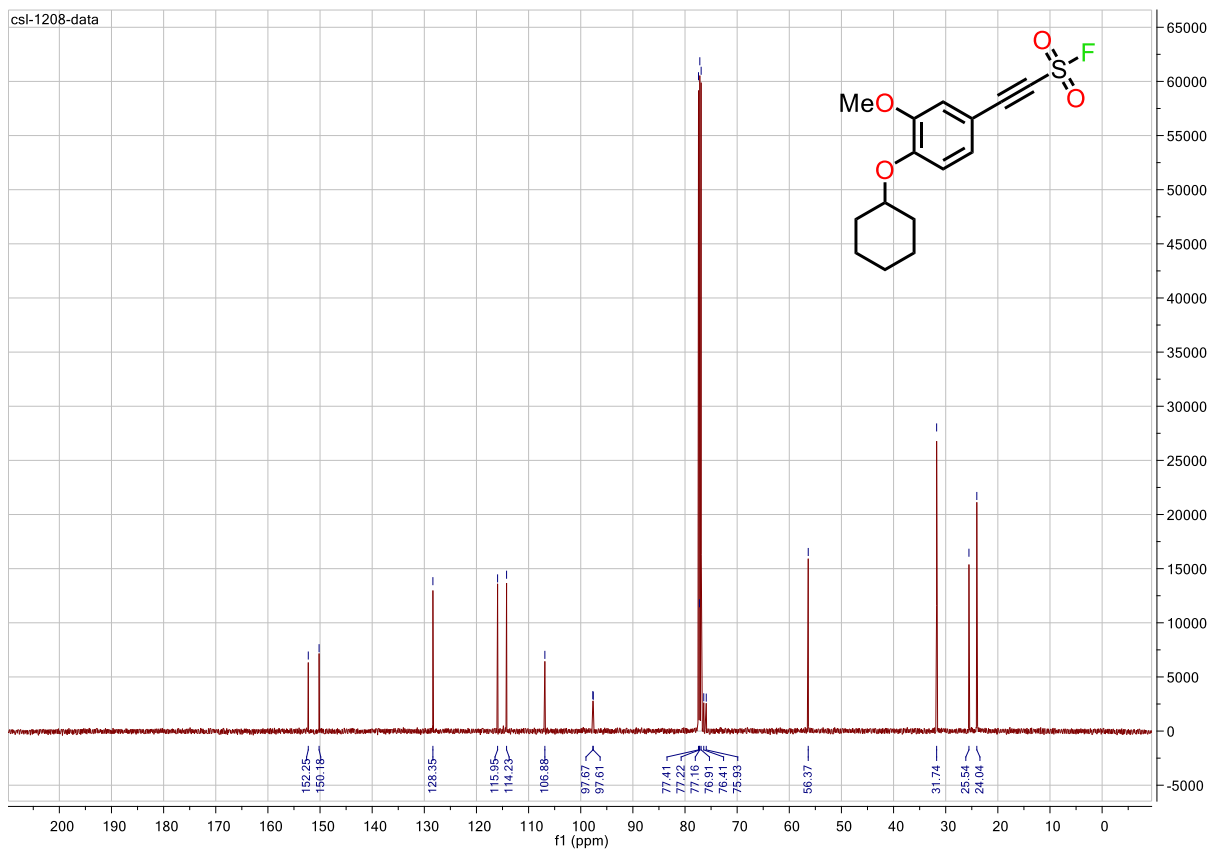

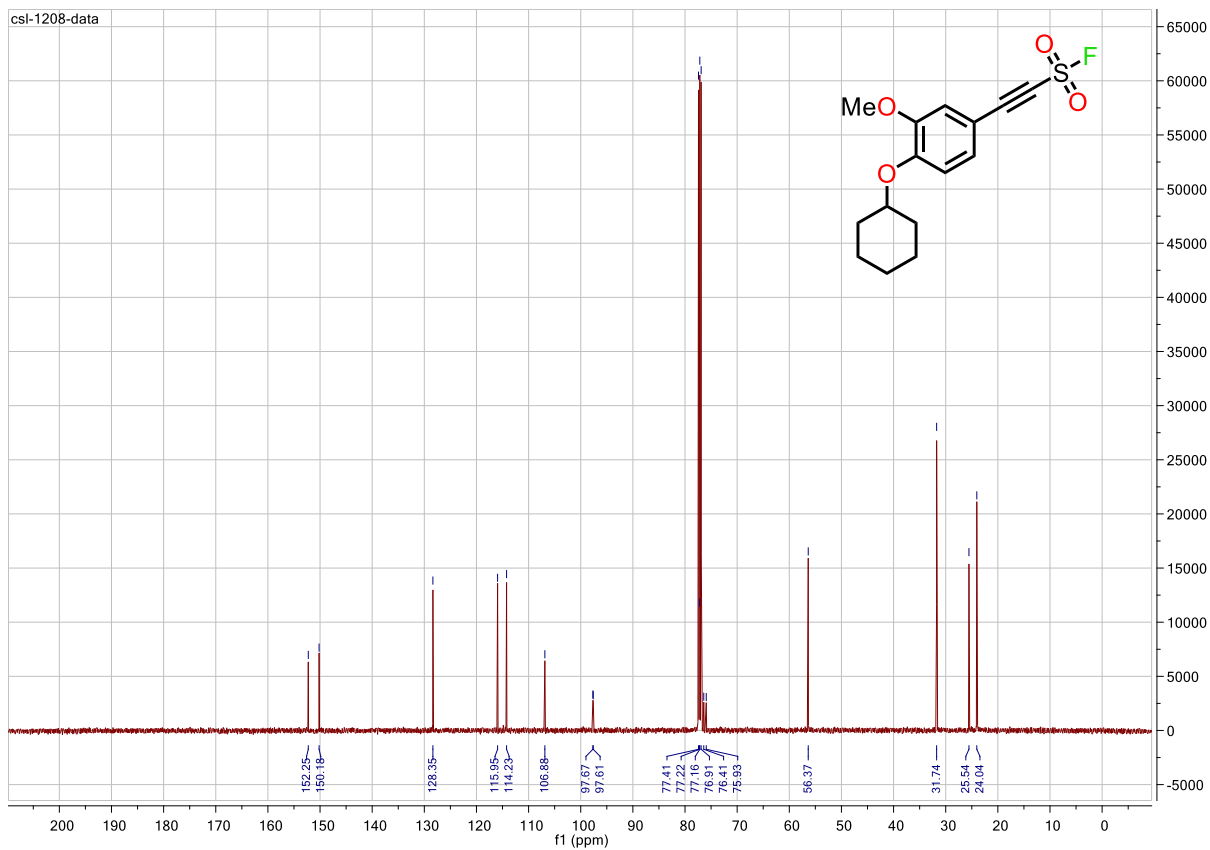

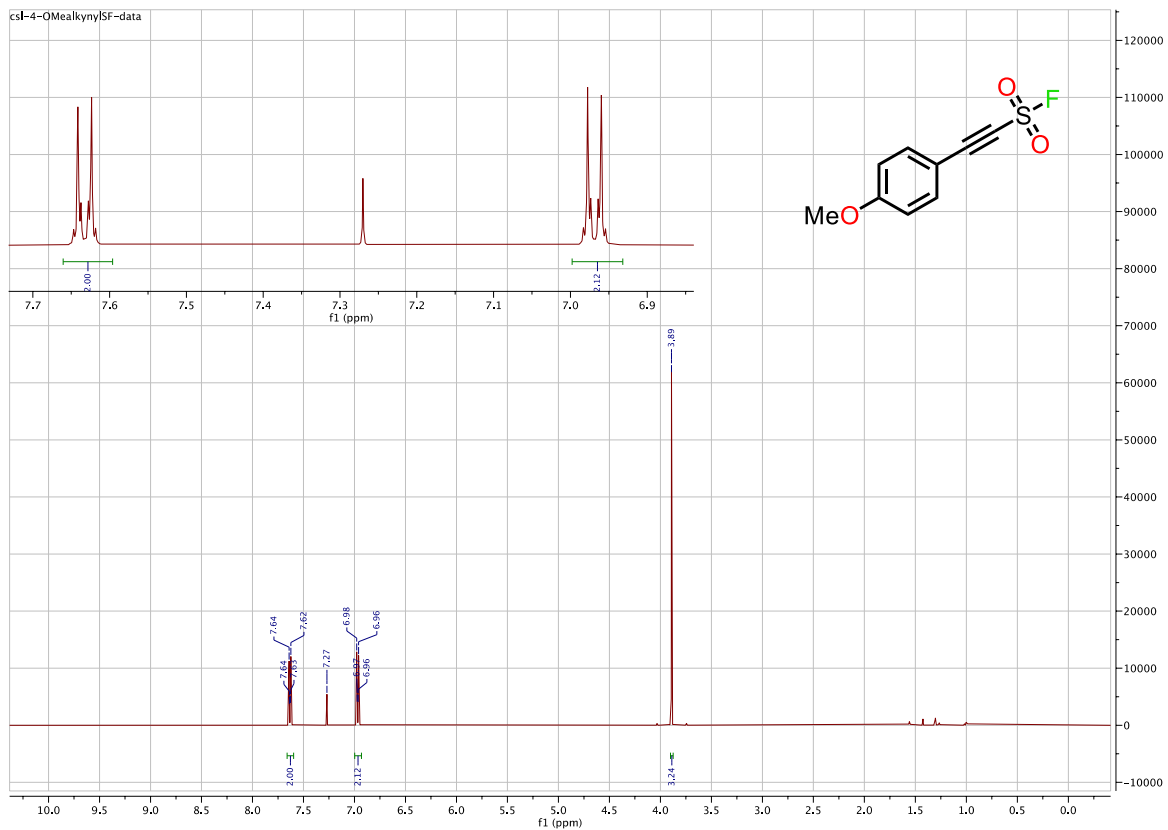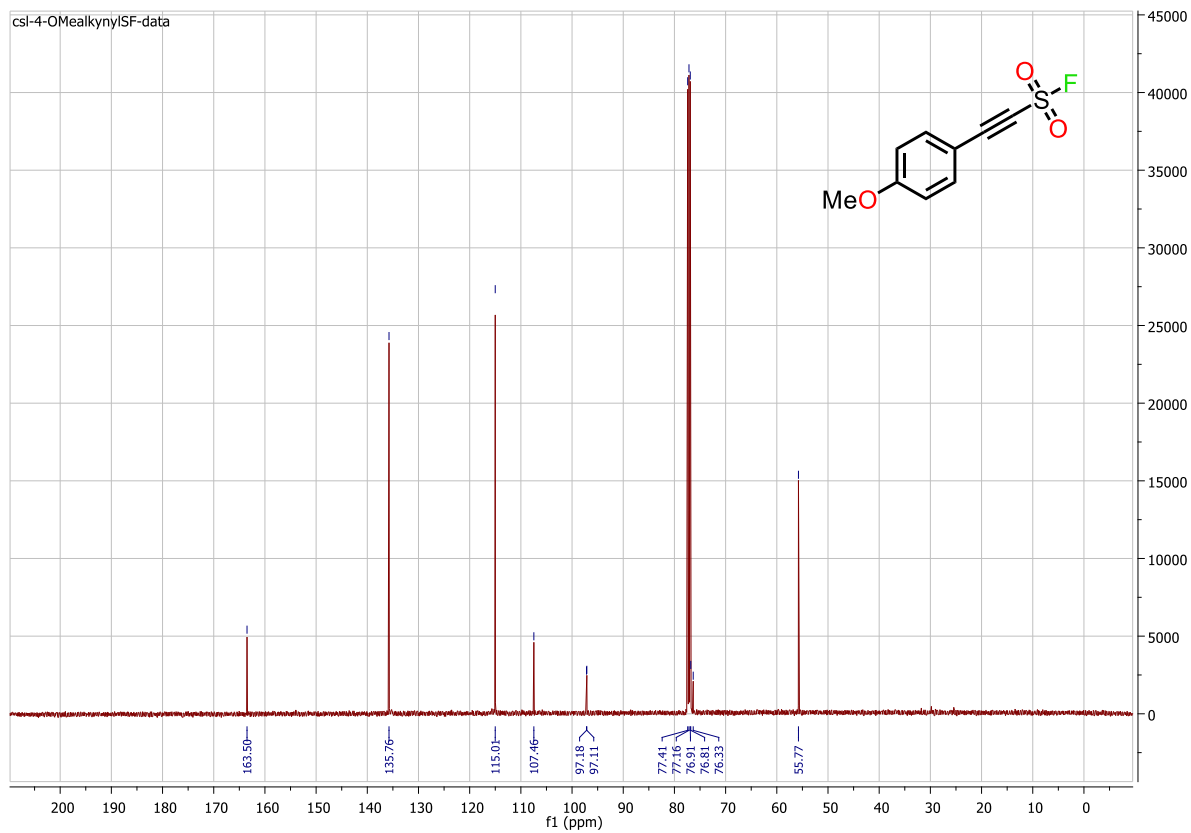

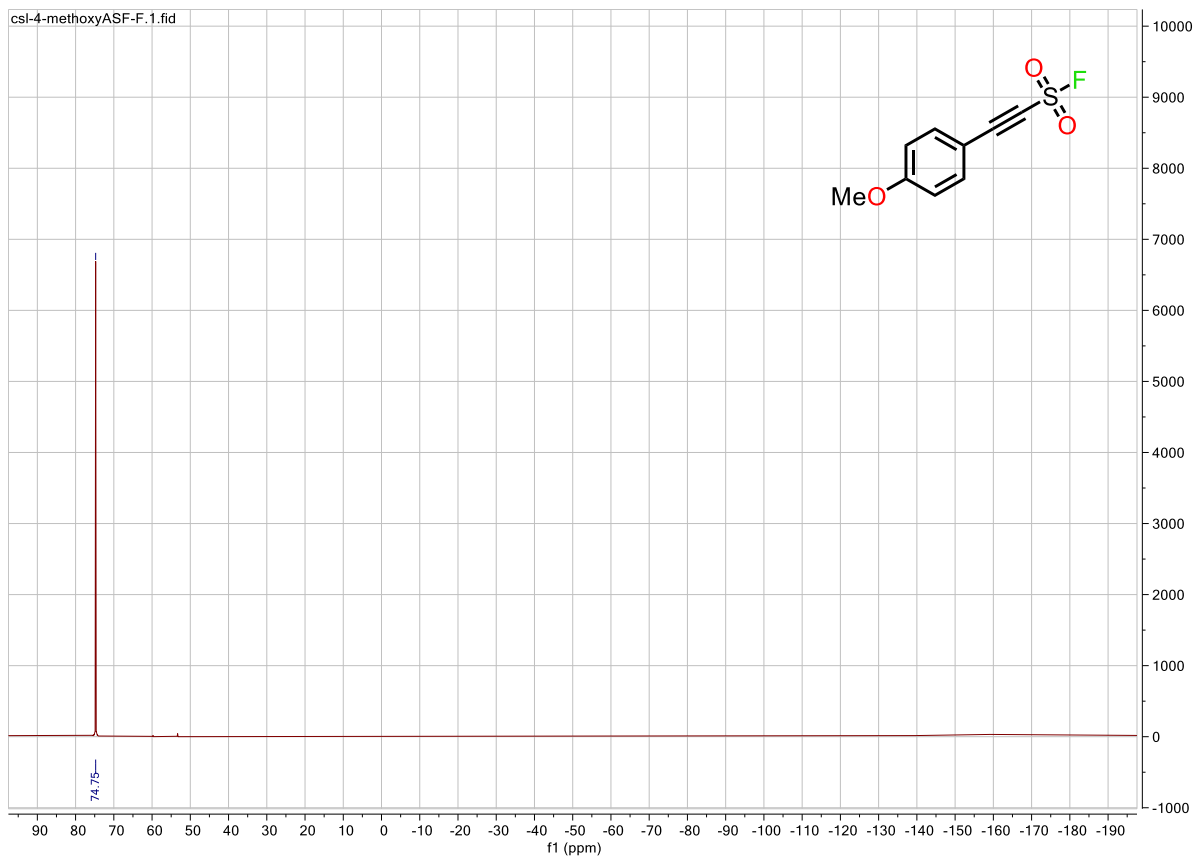

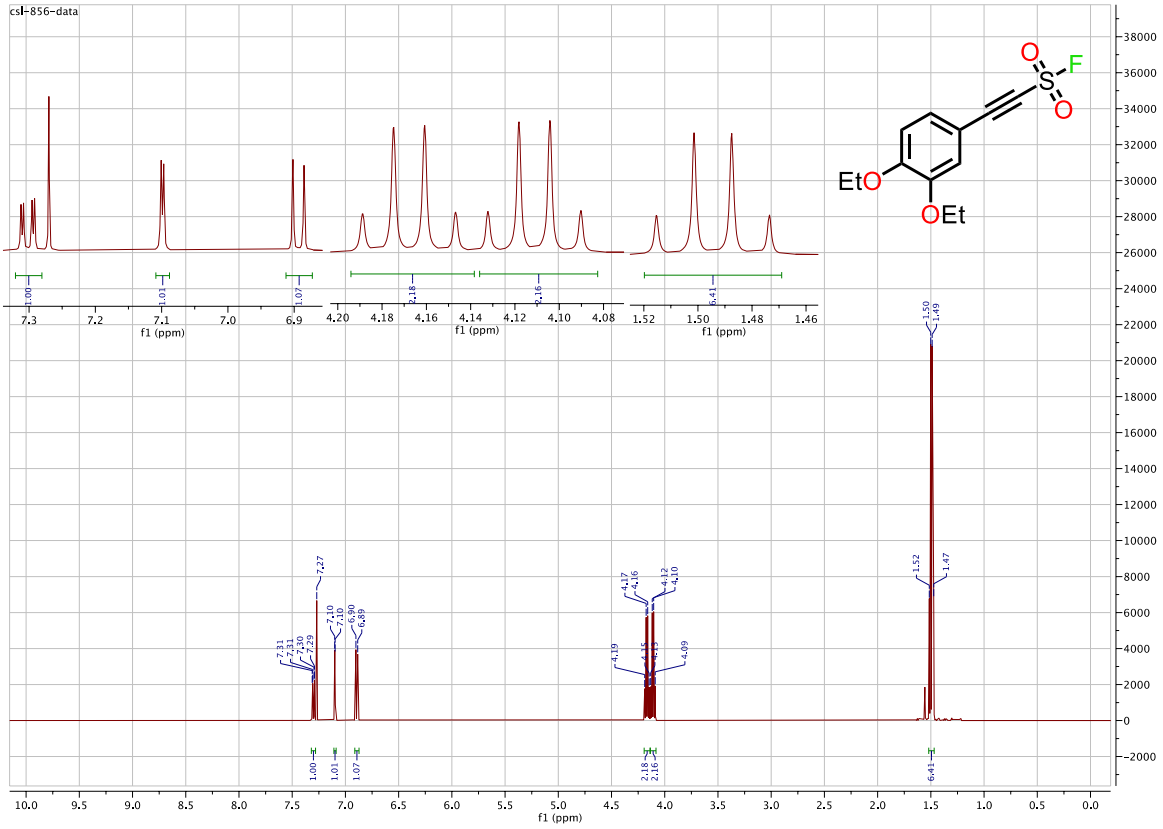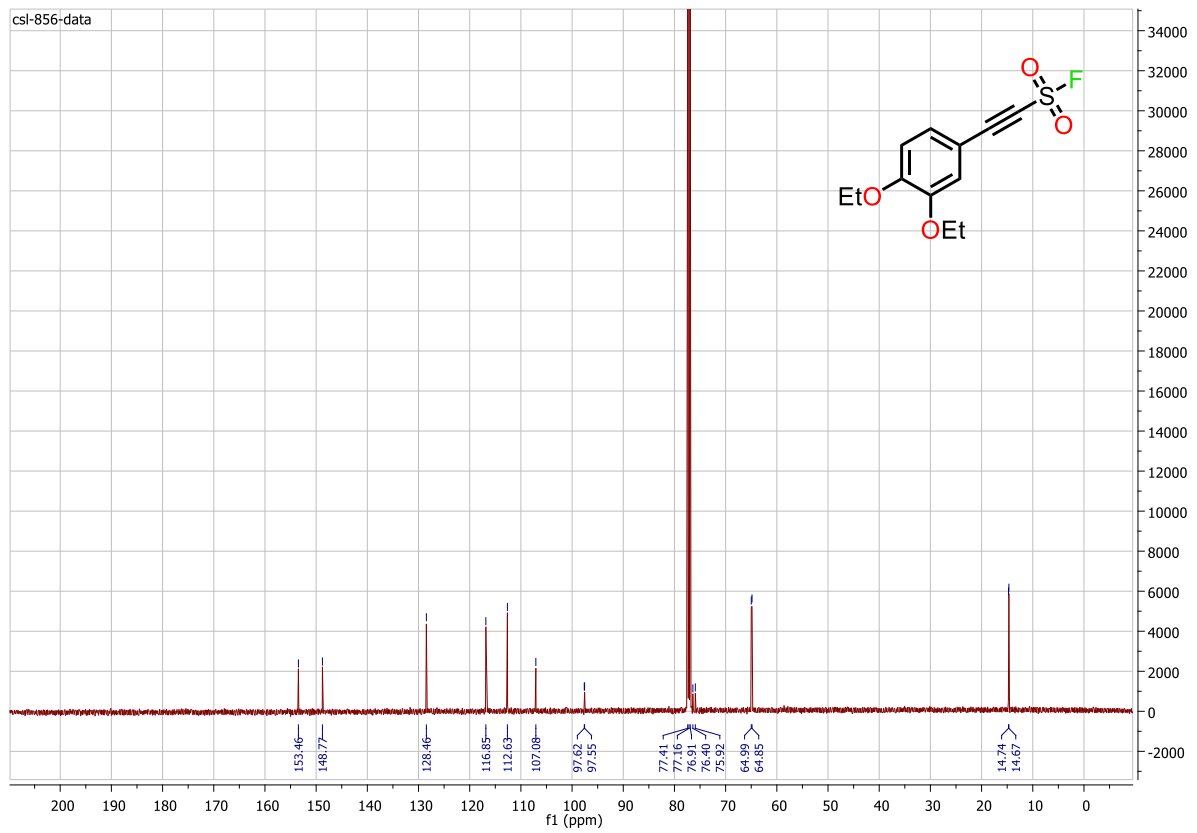



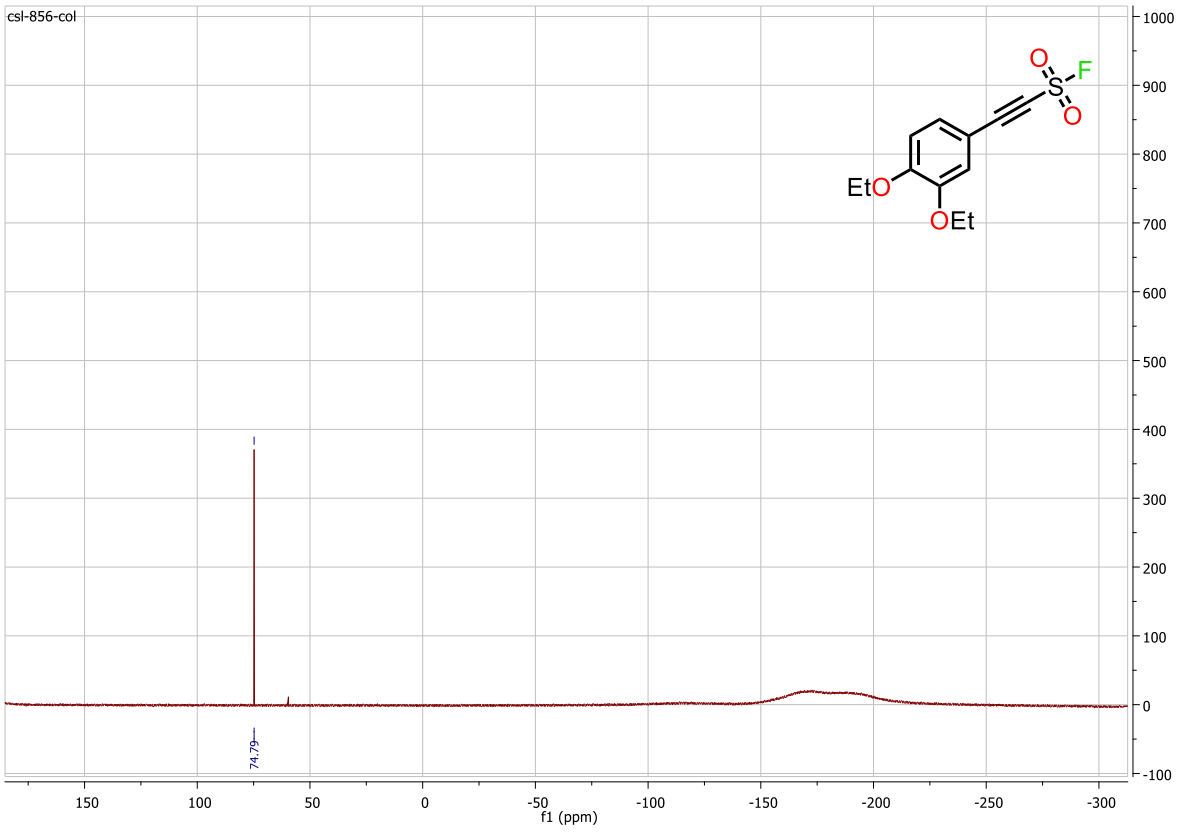

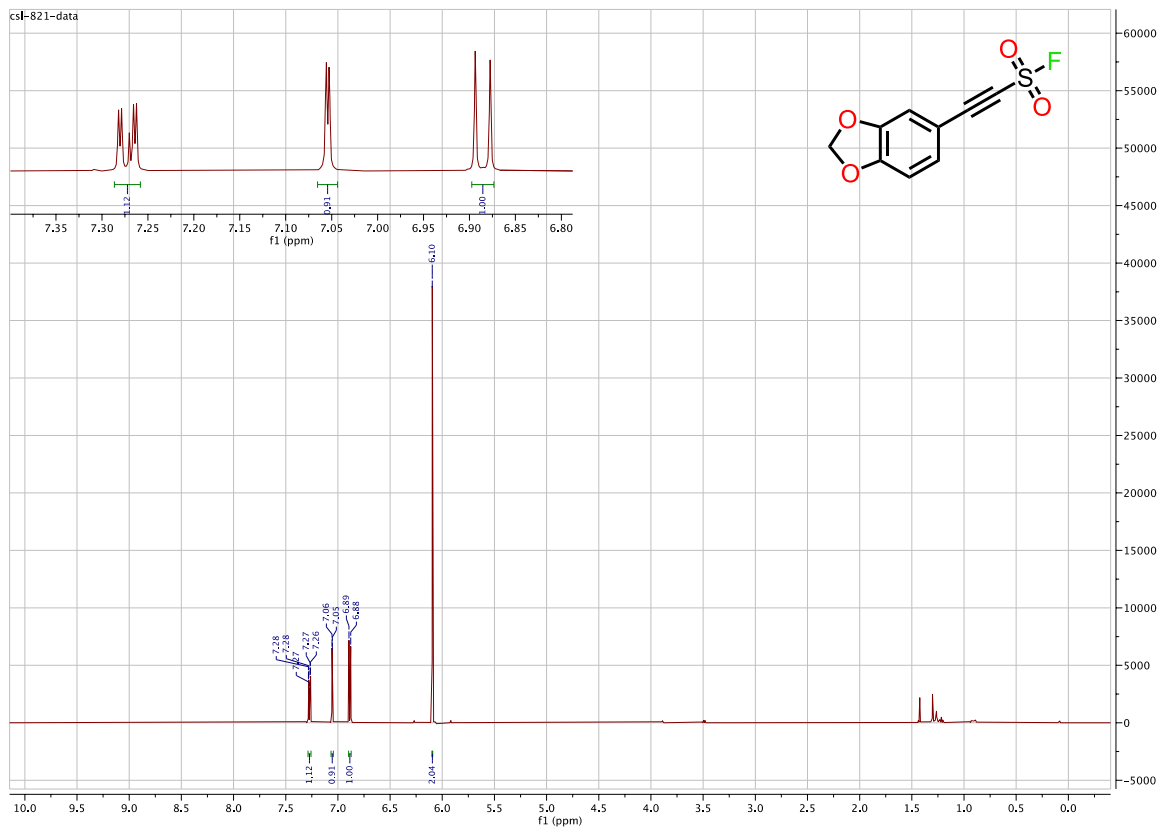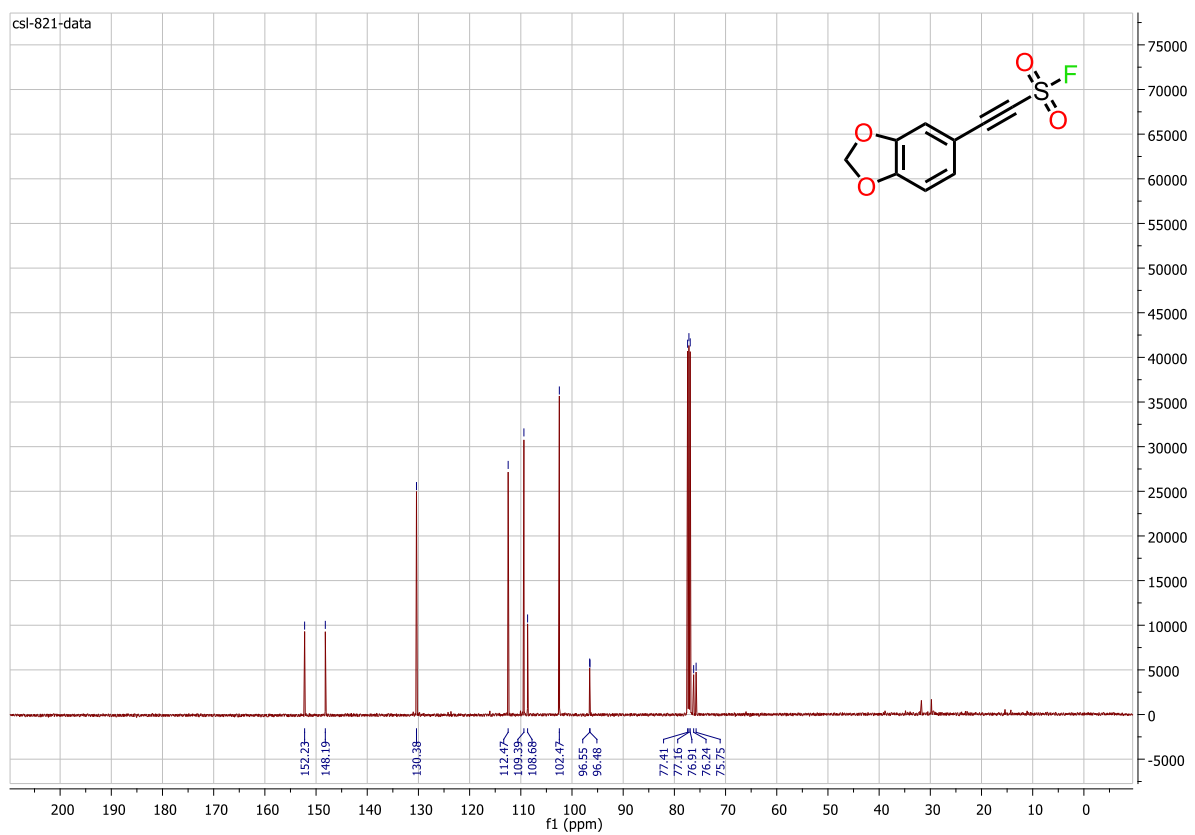

csi-821-col2

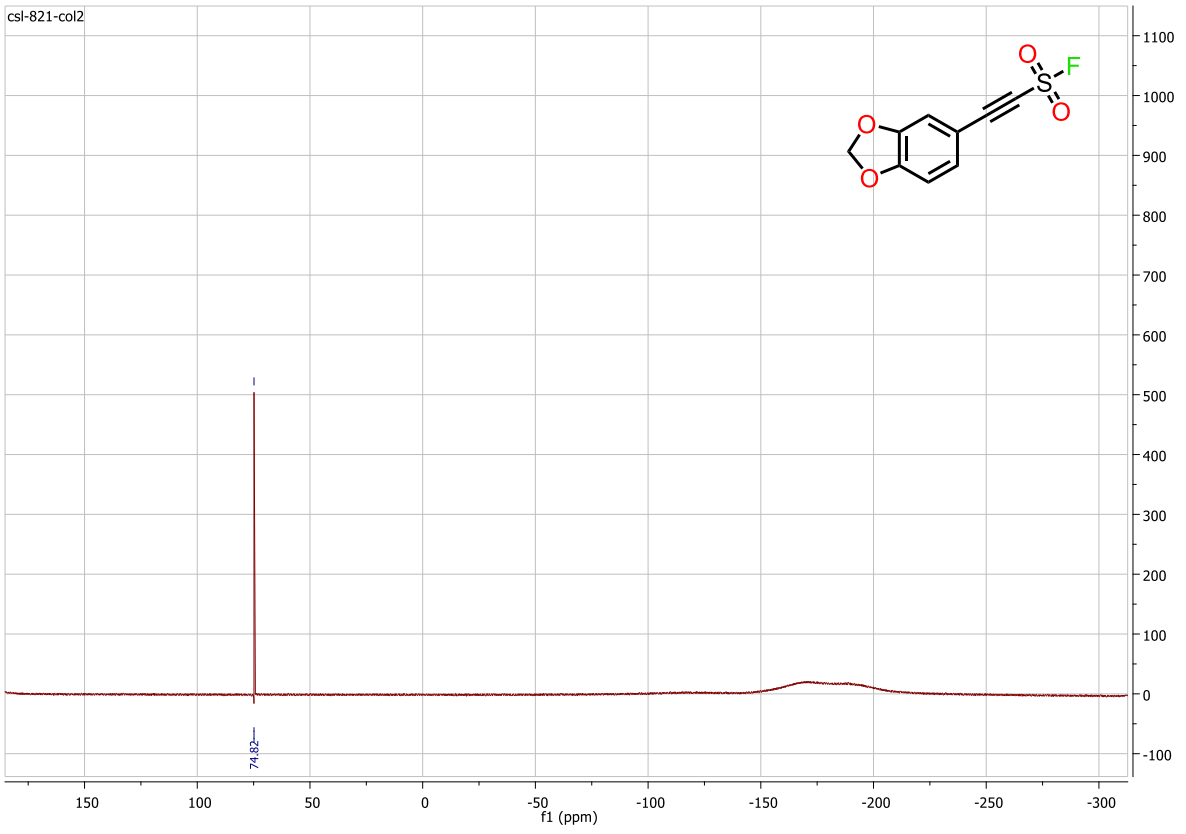

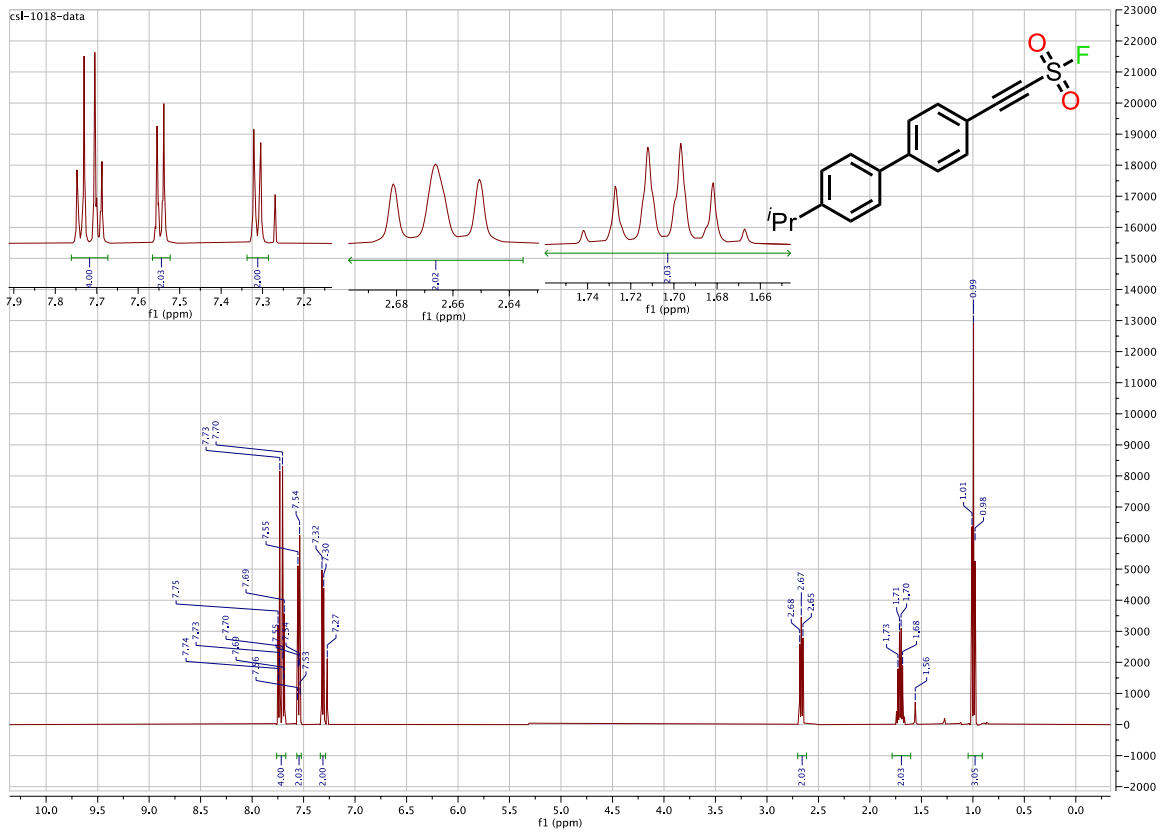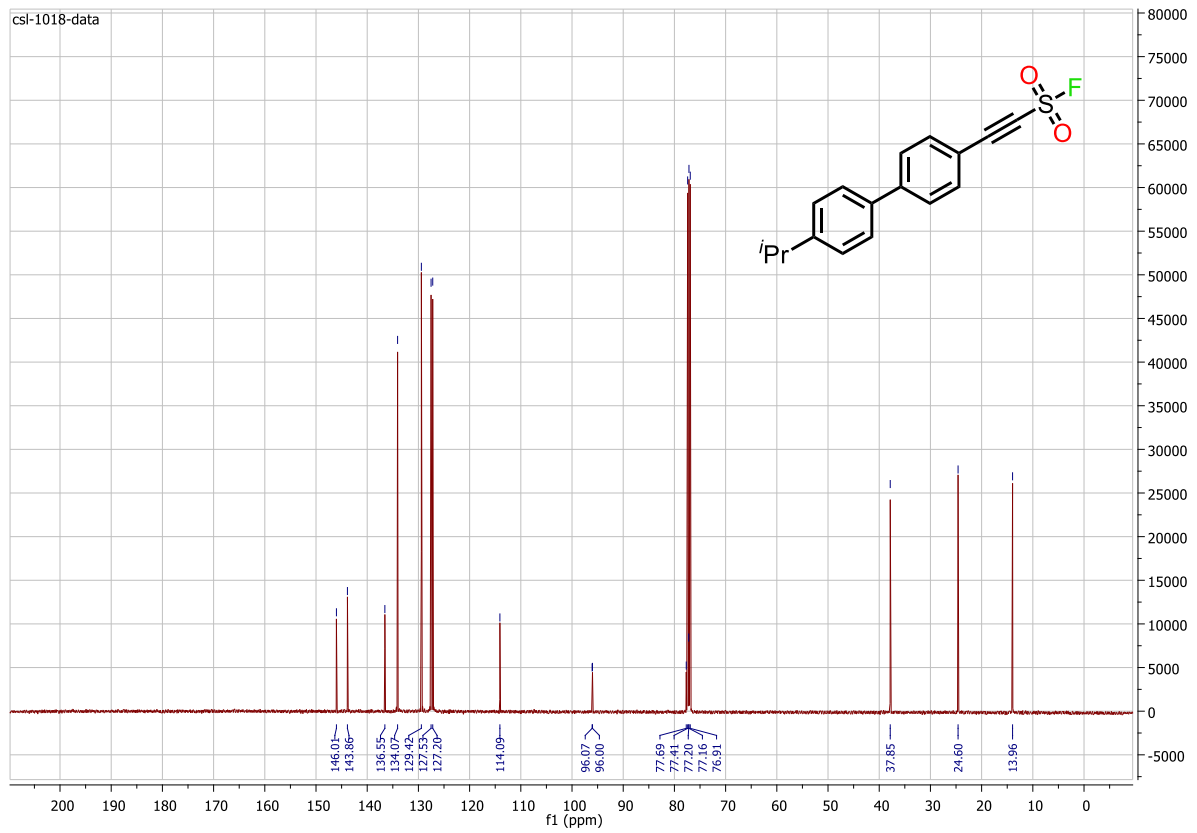

csl-1018  
Standard 19F

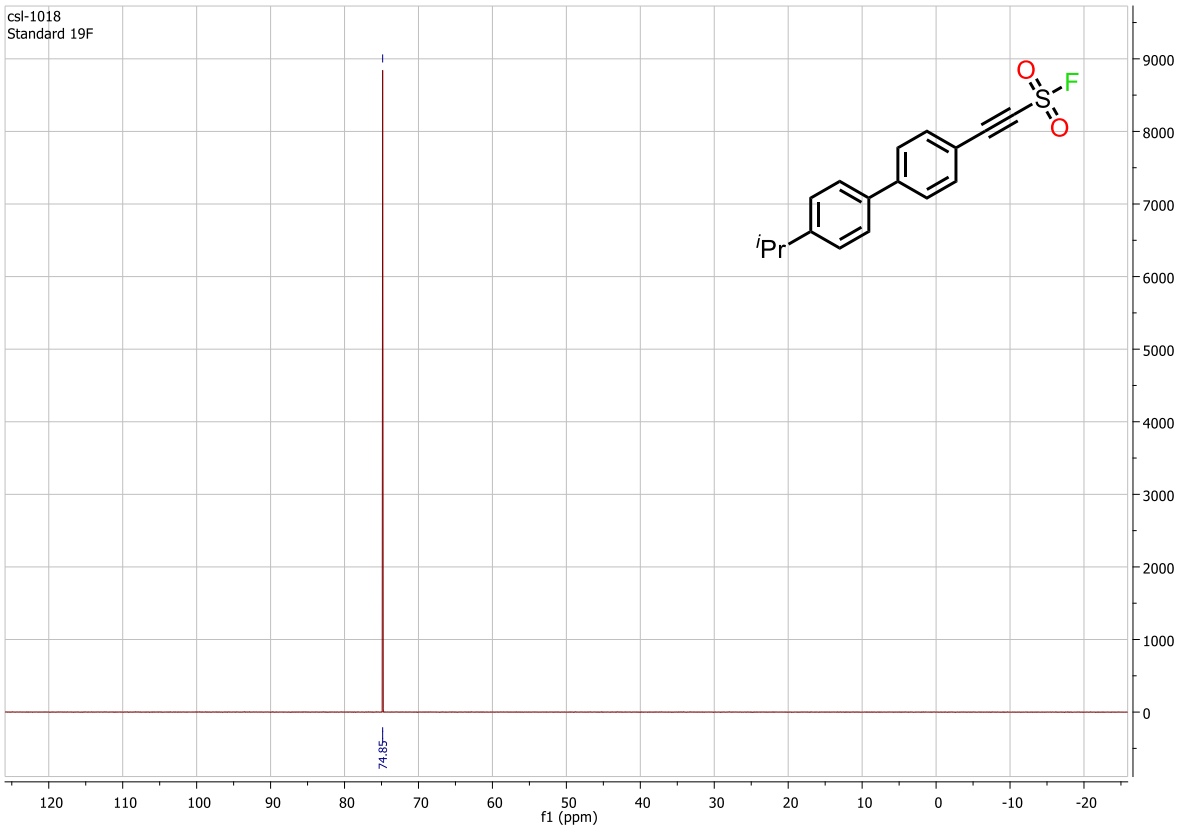

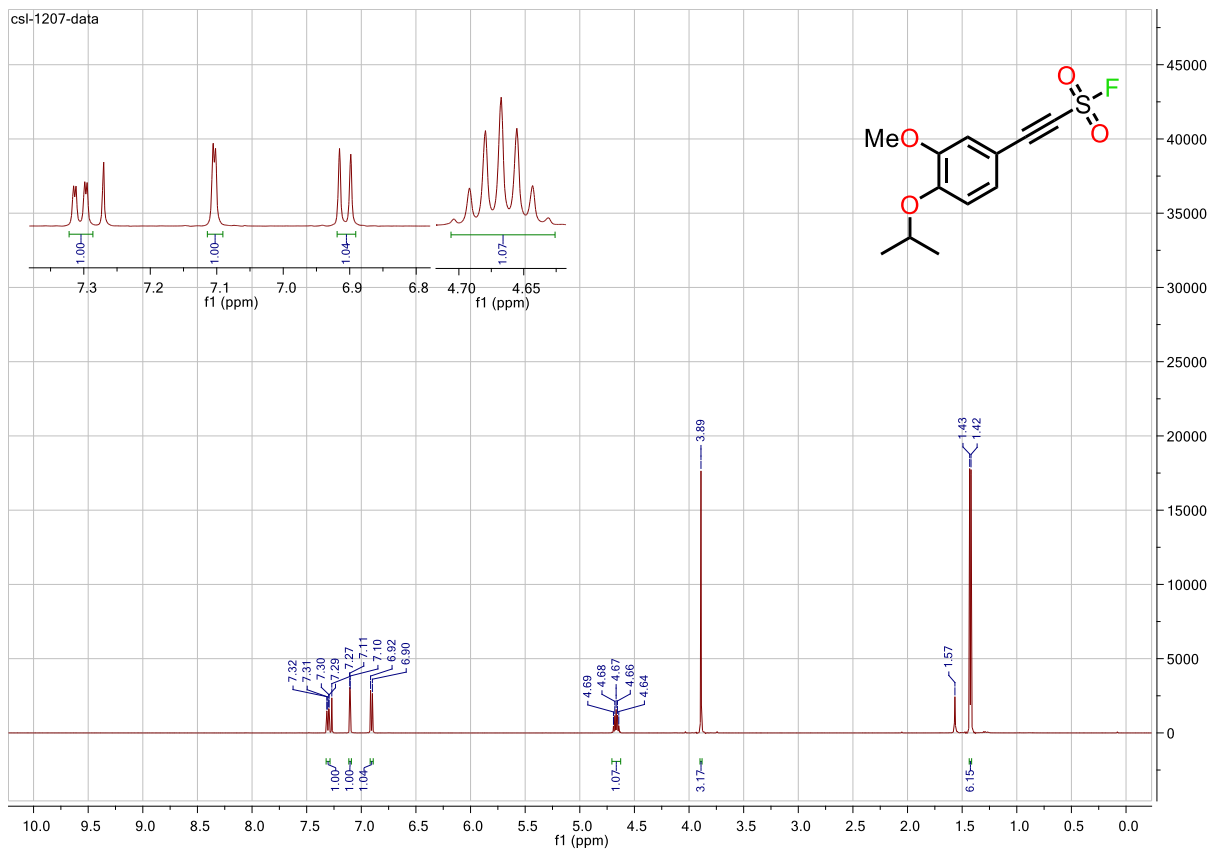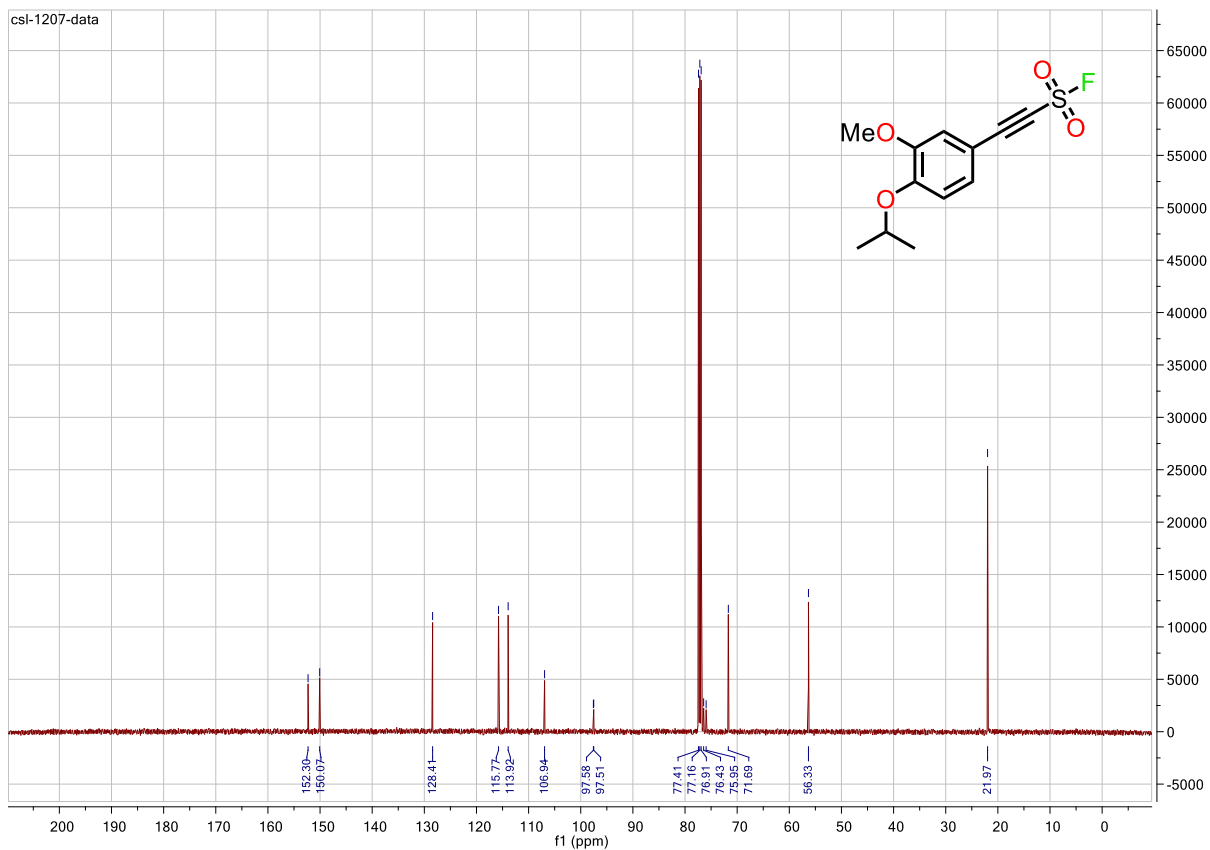

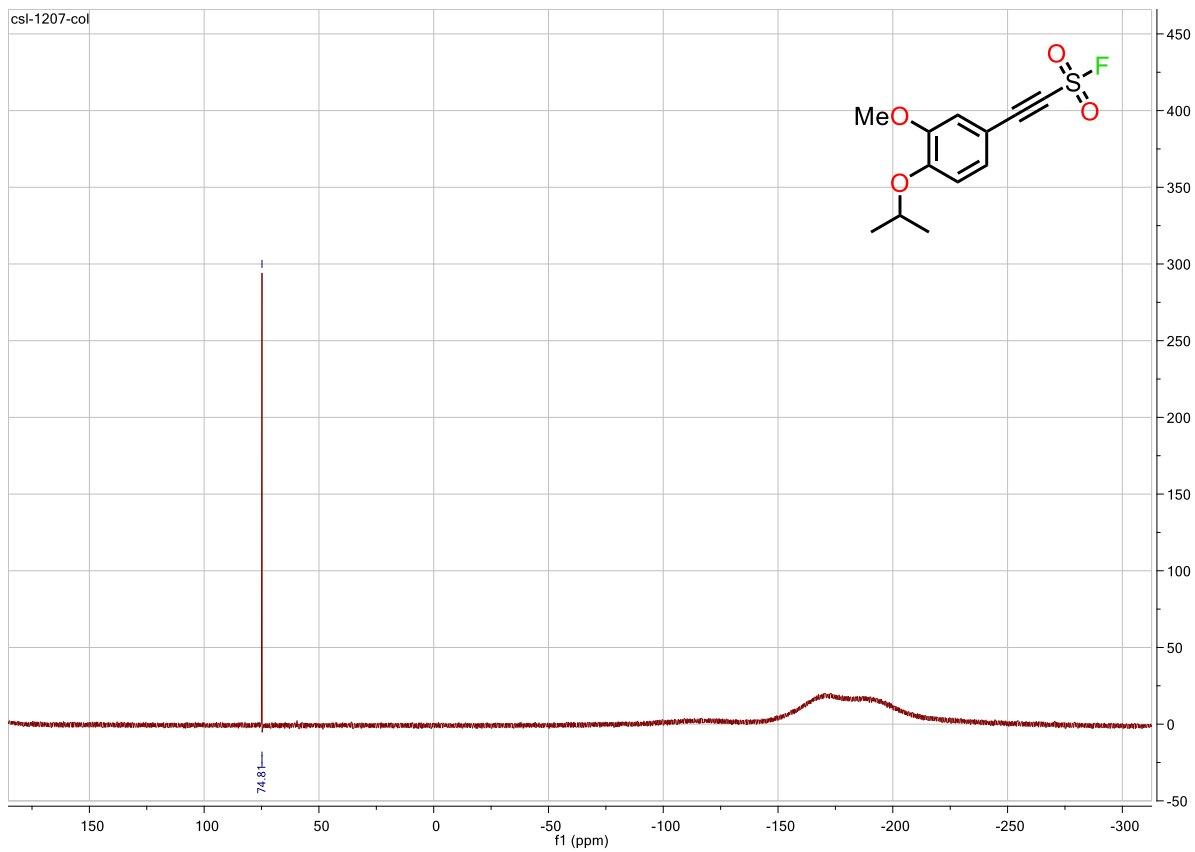

csi-340-data1.fid  
H1\_standard CDCl3 (C:\Users\chemistry400\Dropbox (LIMS)\LIMS 400MHz\csmedley\dropbox400 53

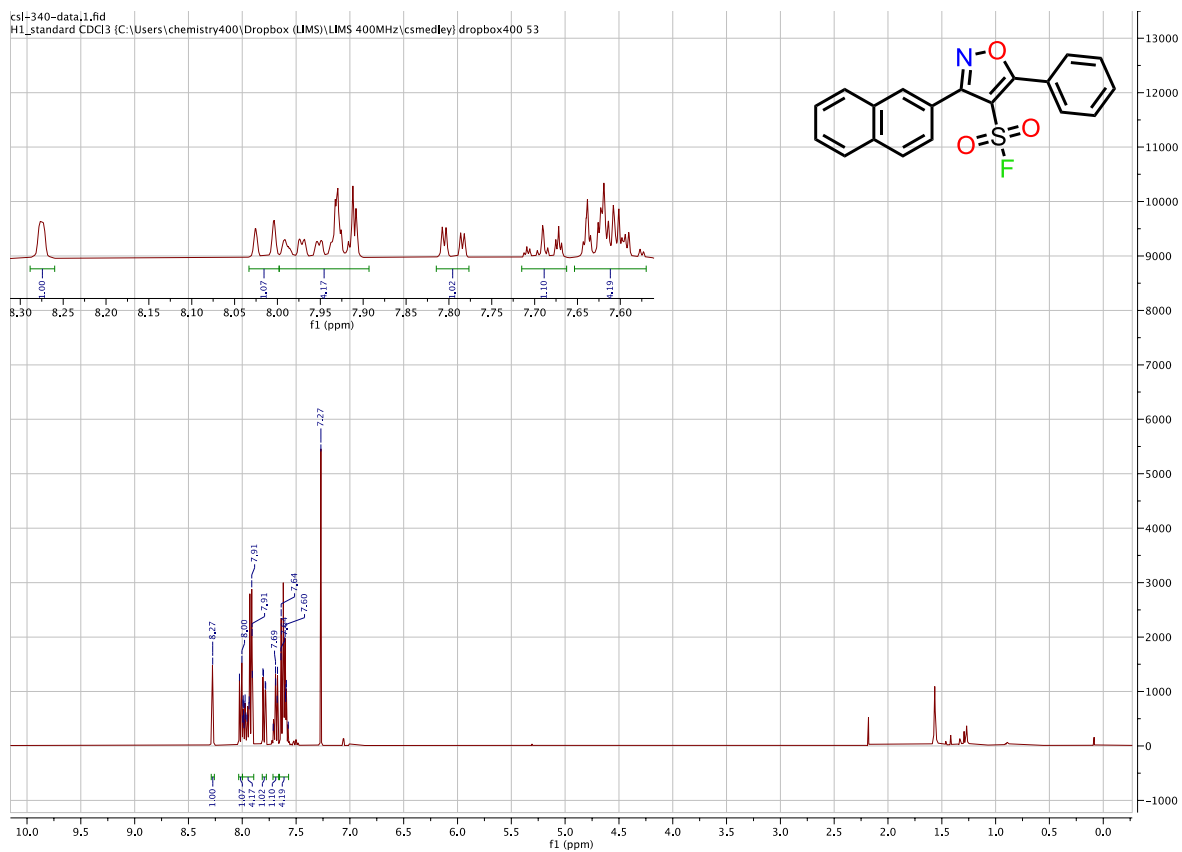

csi-340-data.3.fid  
13C CDCI3 (C:\Users\chemistry400\Dropbox (LIMS)\LIMS 400MHz\csmedley\dropbox400 53

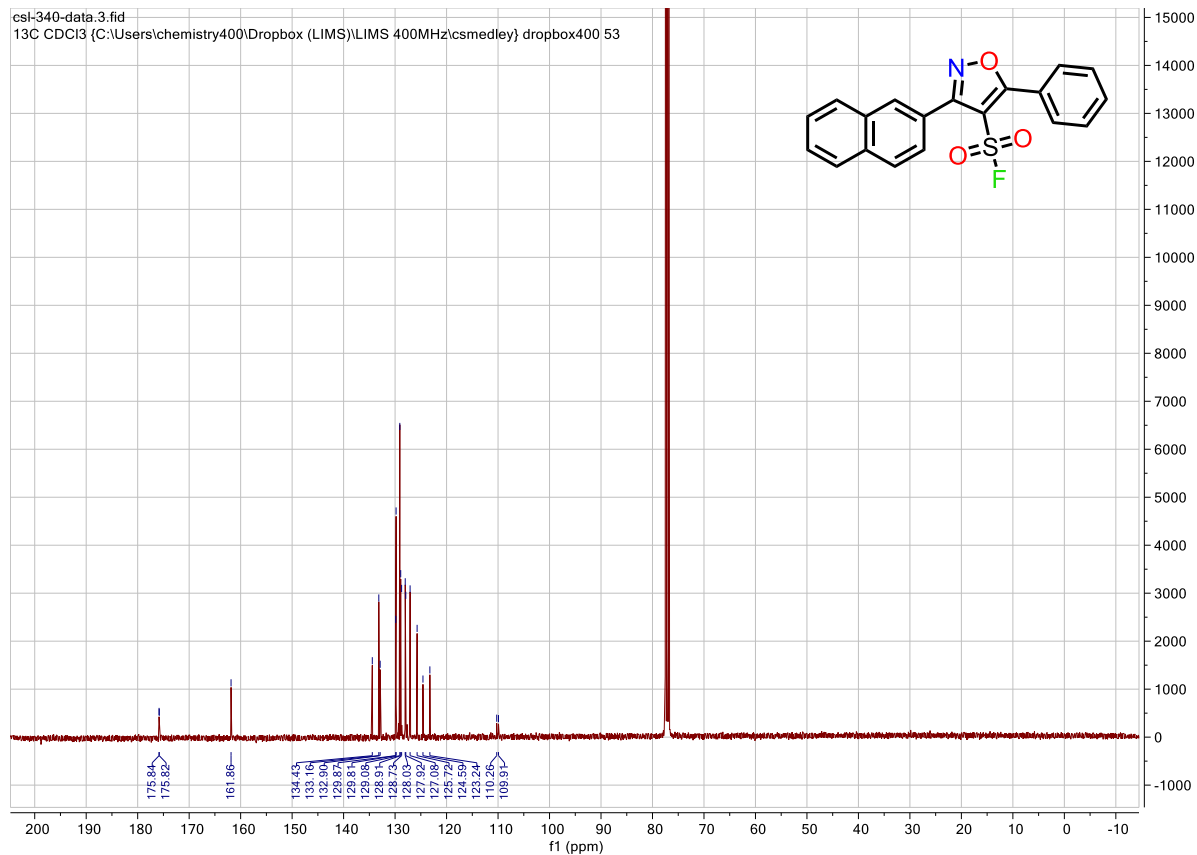



csi-340-data.2.fid  
{F-19 standard} CDCl3 {C:\Users\chemistry400\Dropbox (LIMS)\LIMS 400MHz\csmedley} dropbox400 53

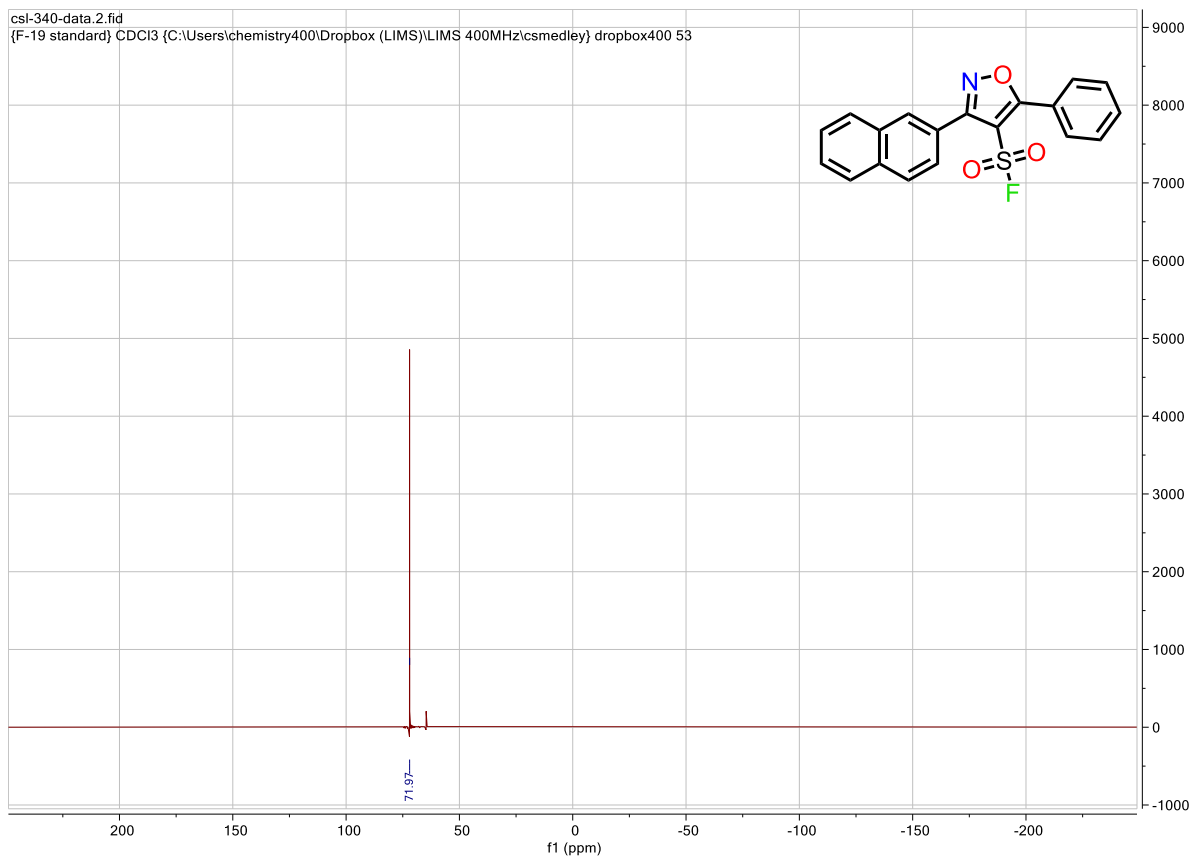

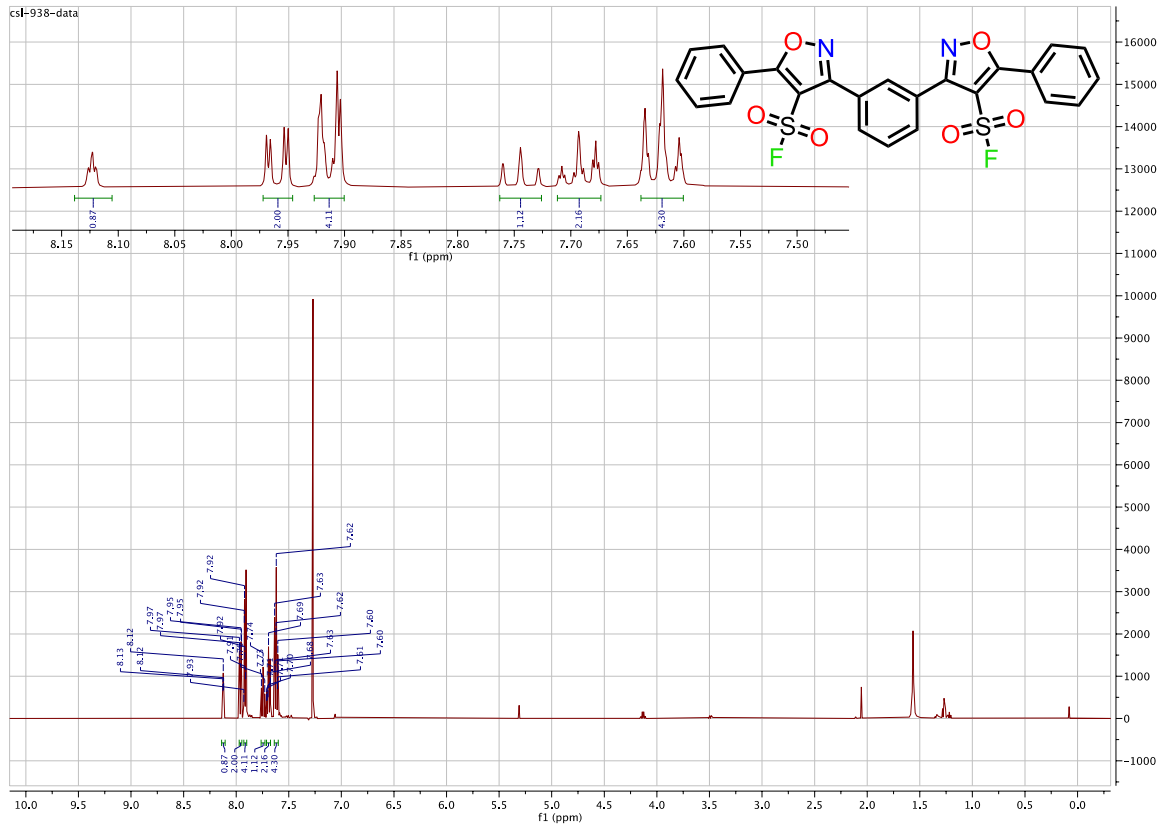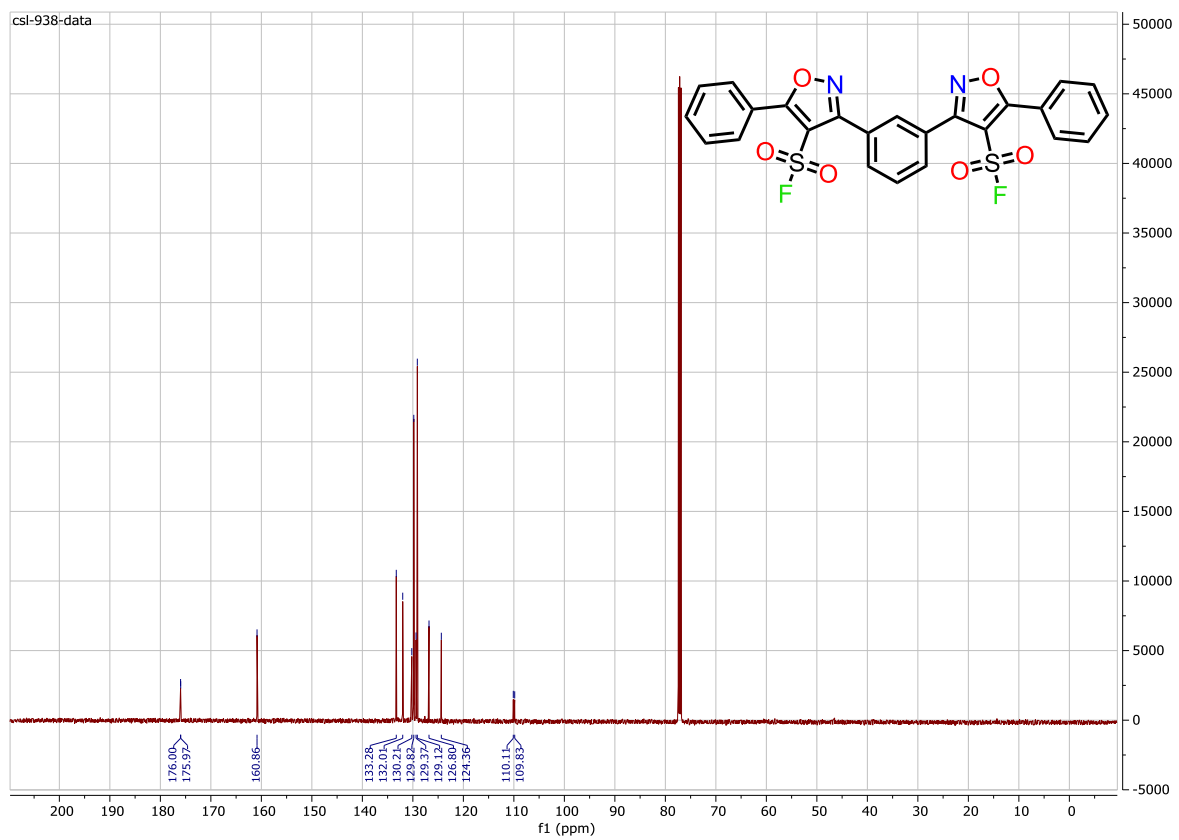

csi-938

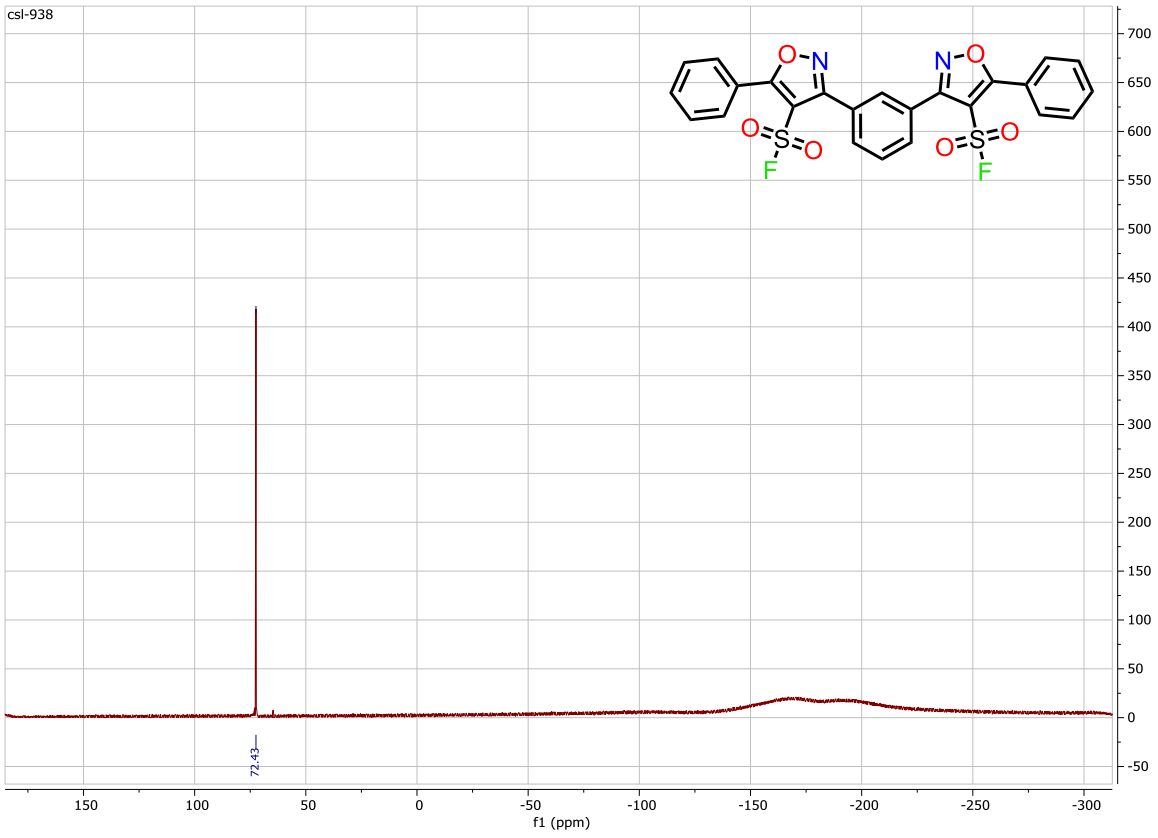

csi-338-data.1.fid  
H1\_standard CDCI3 (C:\Users\chemistry400\Dropbox (LIMS)\LIMS 400MHz\csmedley) dropbox400 52

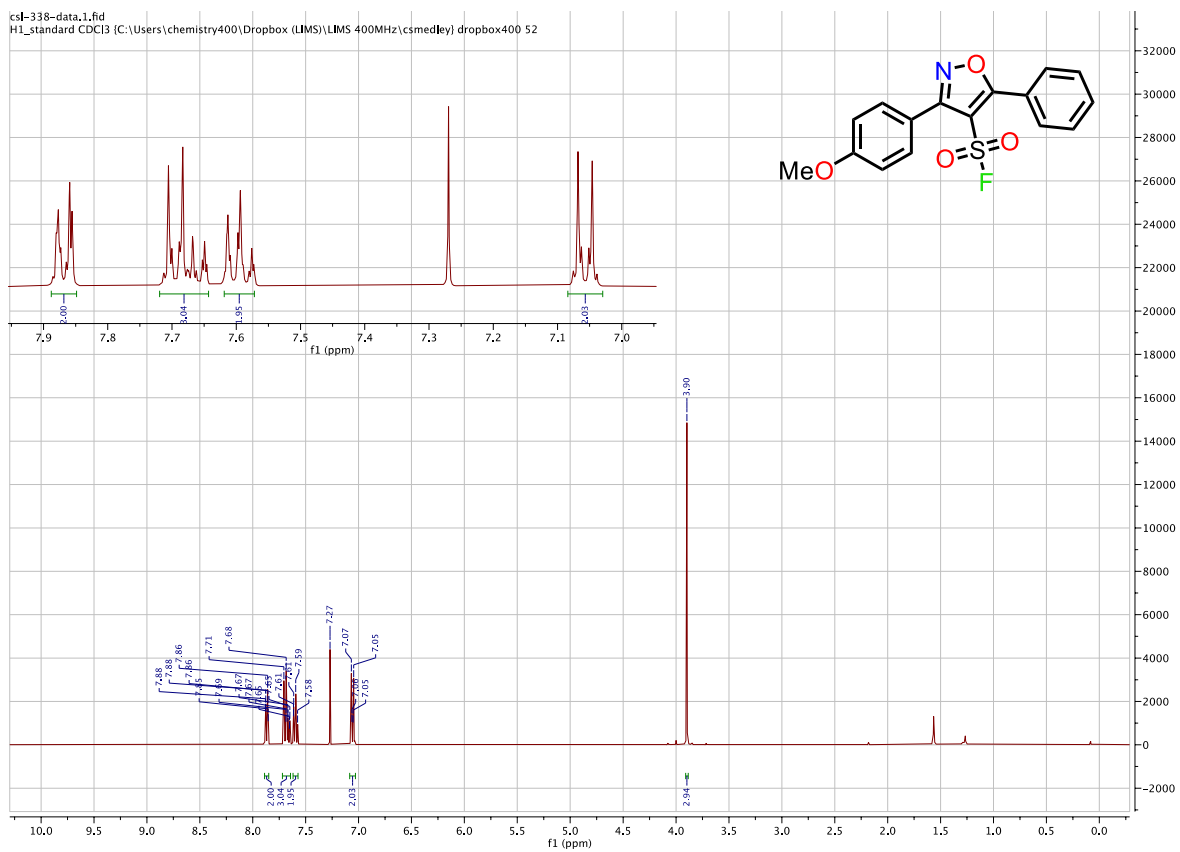

csi-338-data.4.fid  
13C CDCI3 (C:\Users\chemistry400\Dropbox (LIMS)\LIMS 400MHz\csmedley) dropbox400 52

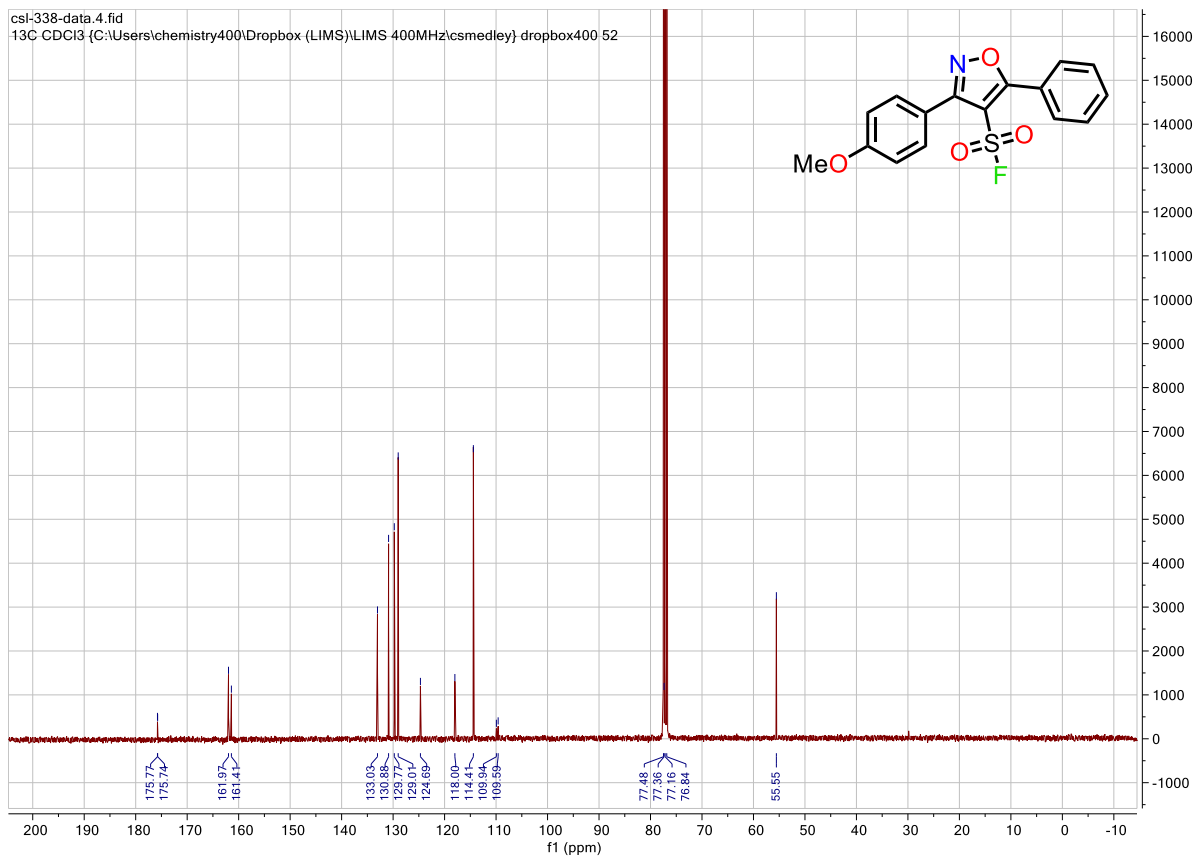

csi-338-data.2.fid  
{F-19 standard} CDCl3 {C:\Users\chemistry400\Dropbox (LIMS)\LIMS 400MHz\csmedley\ dropbox400 52

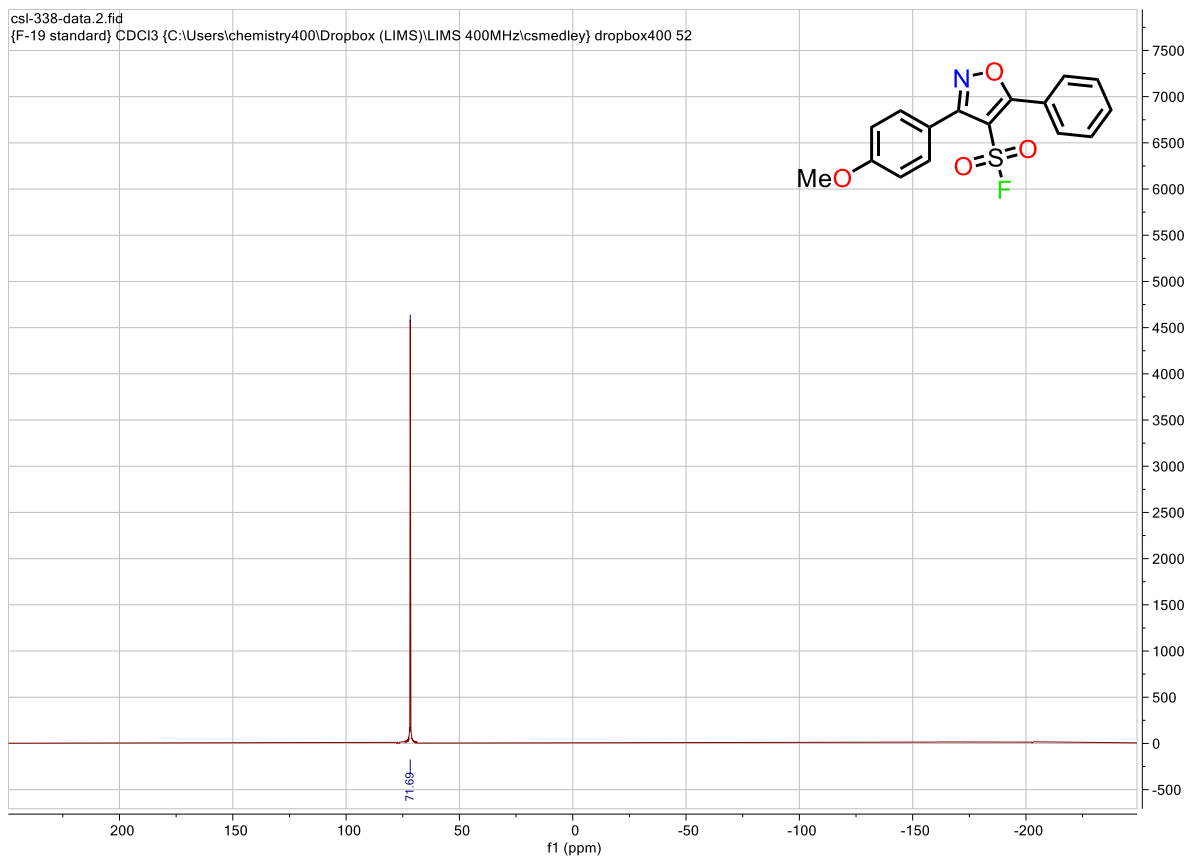

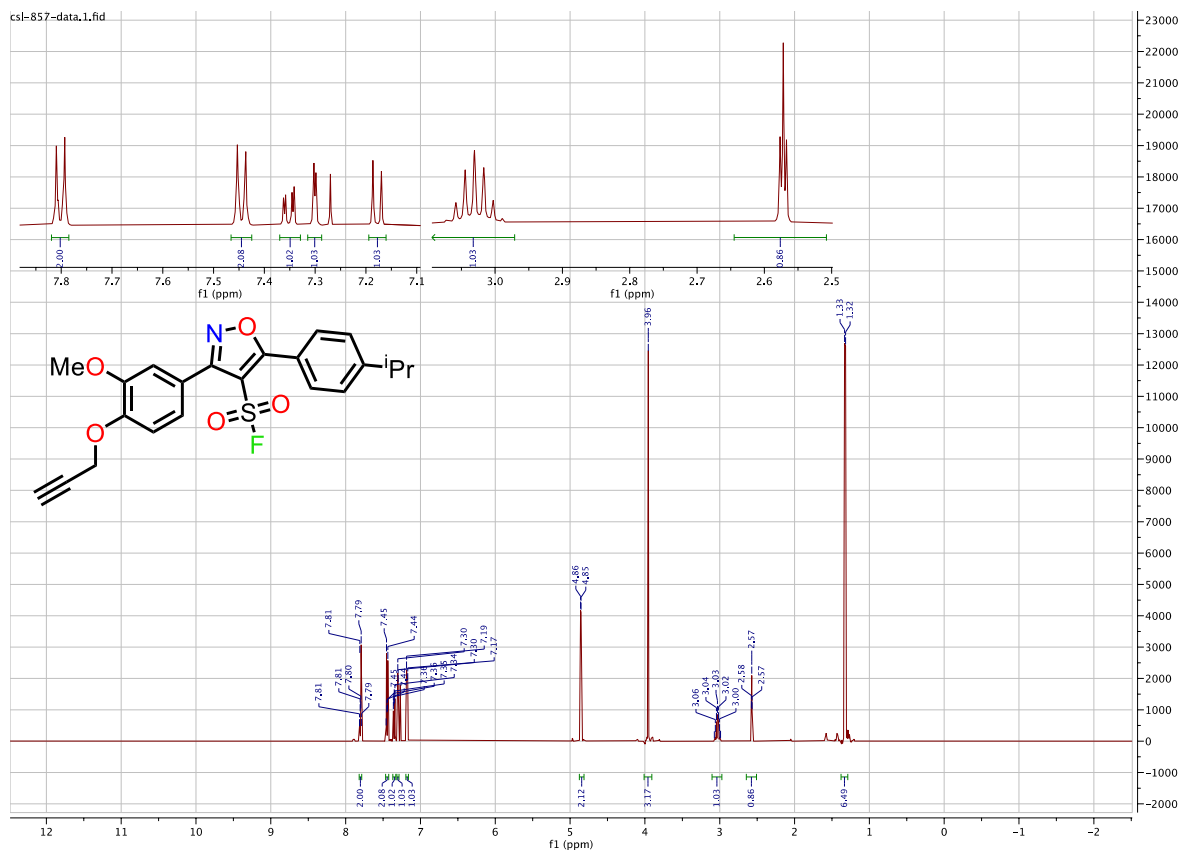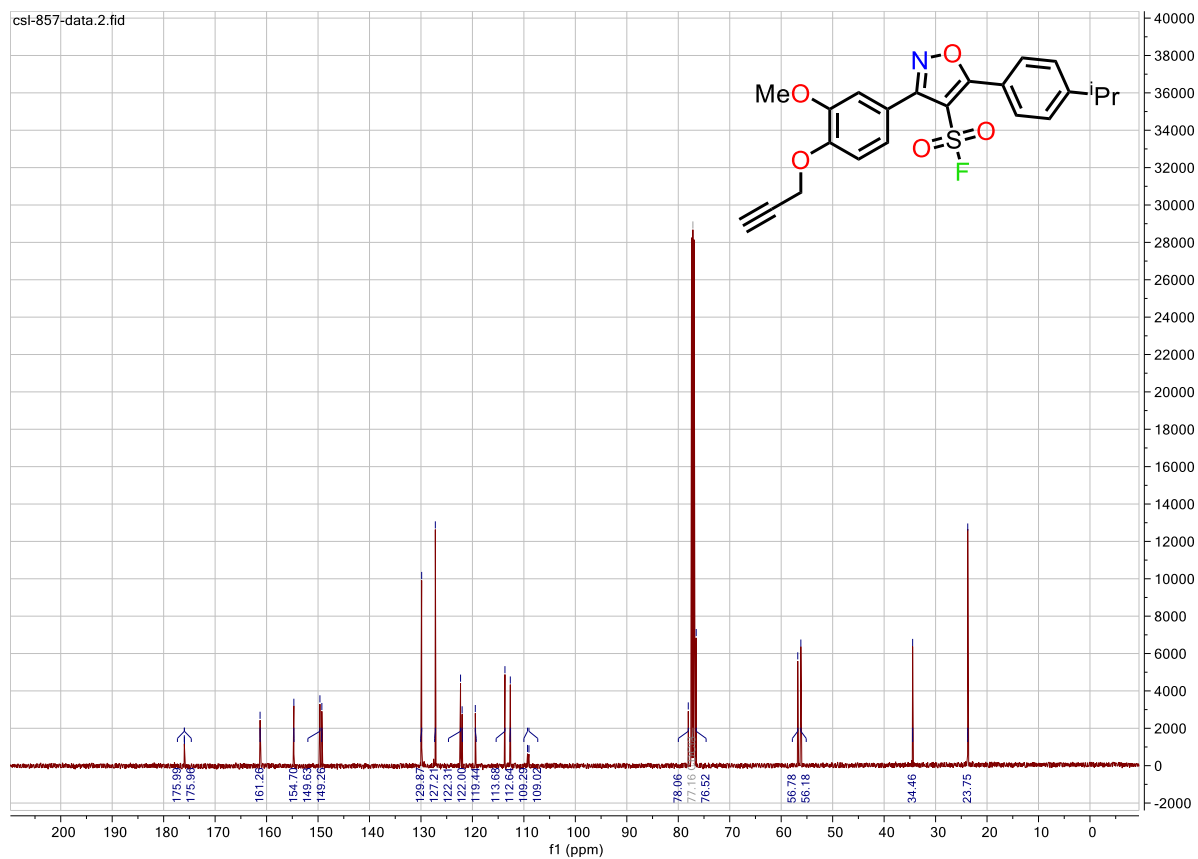

csi-857-F.1.fid

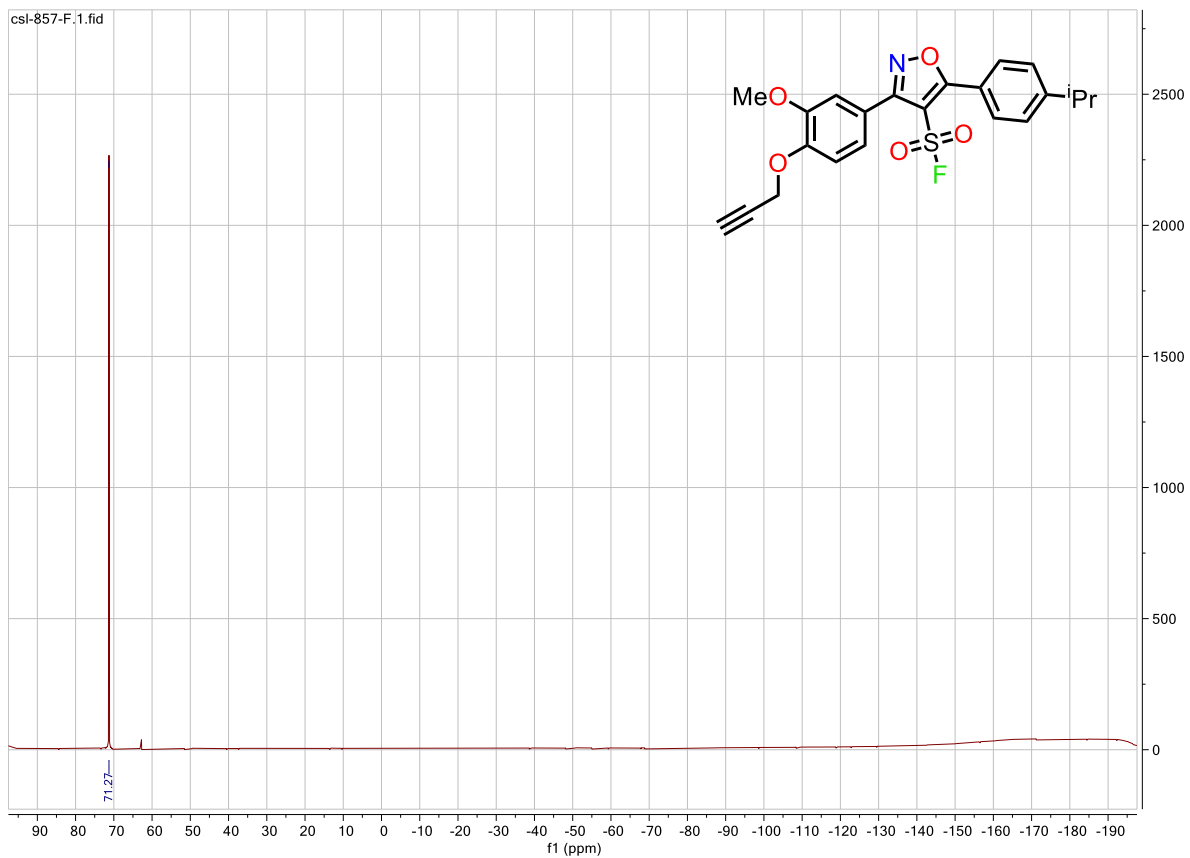

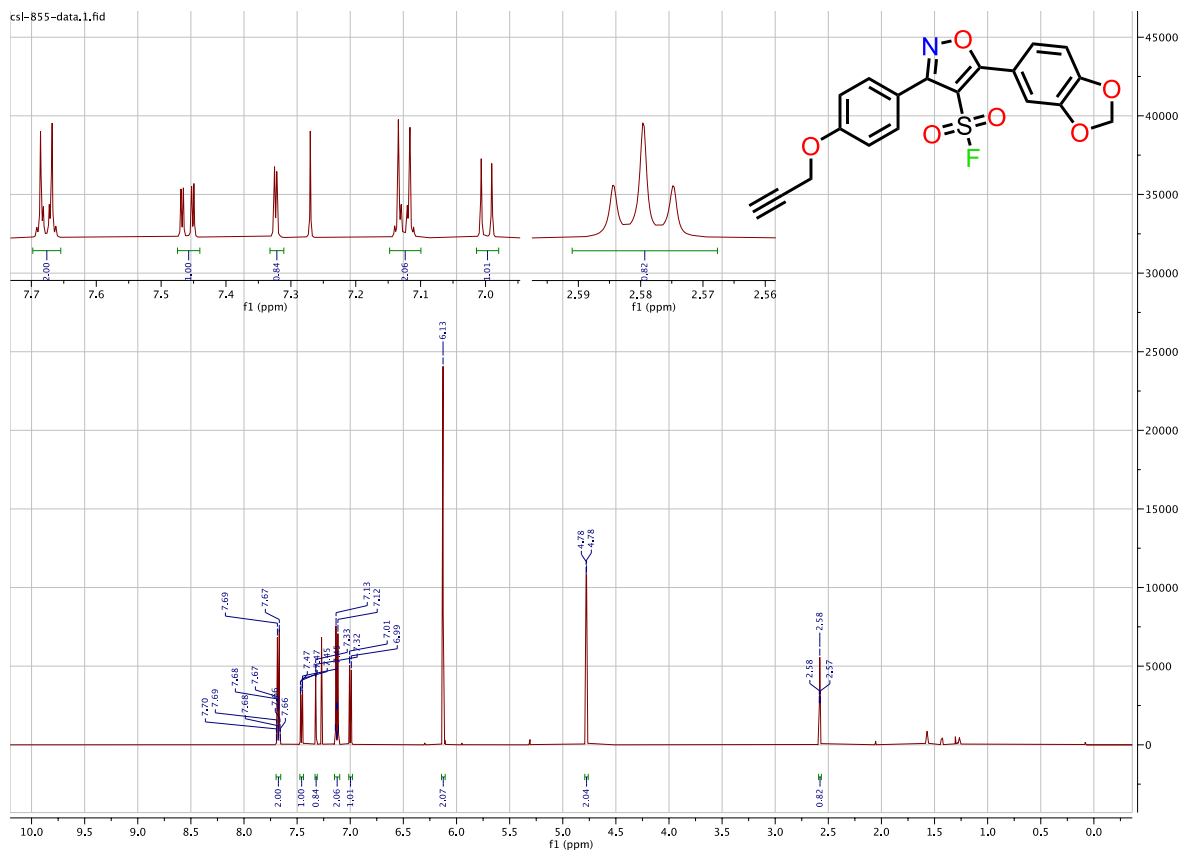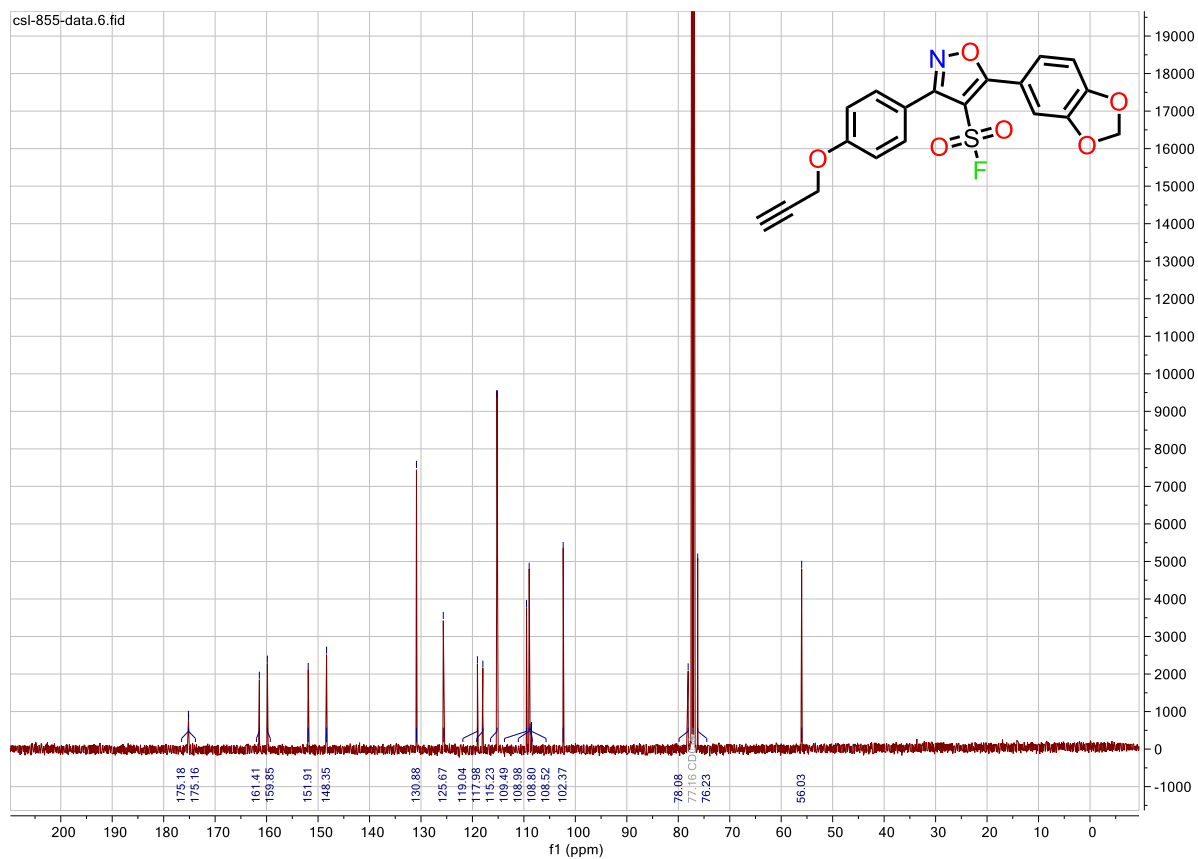



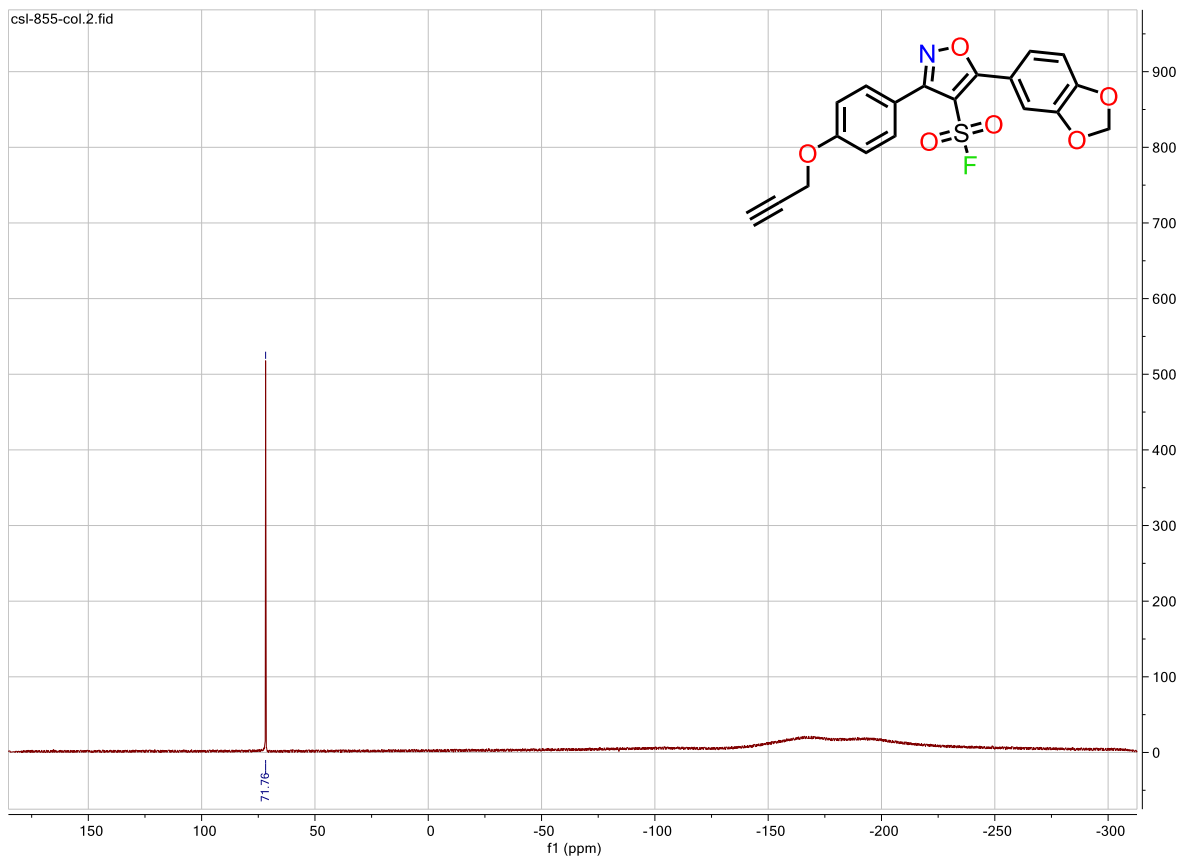

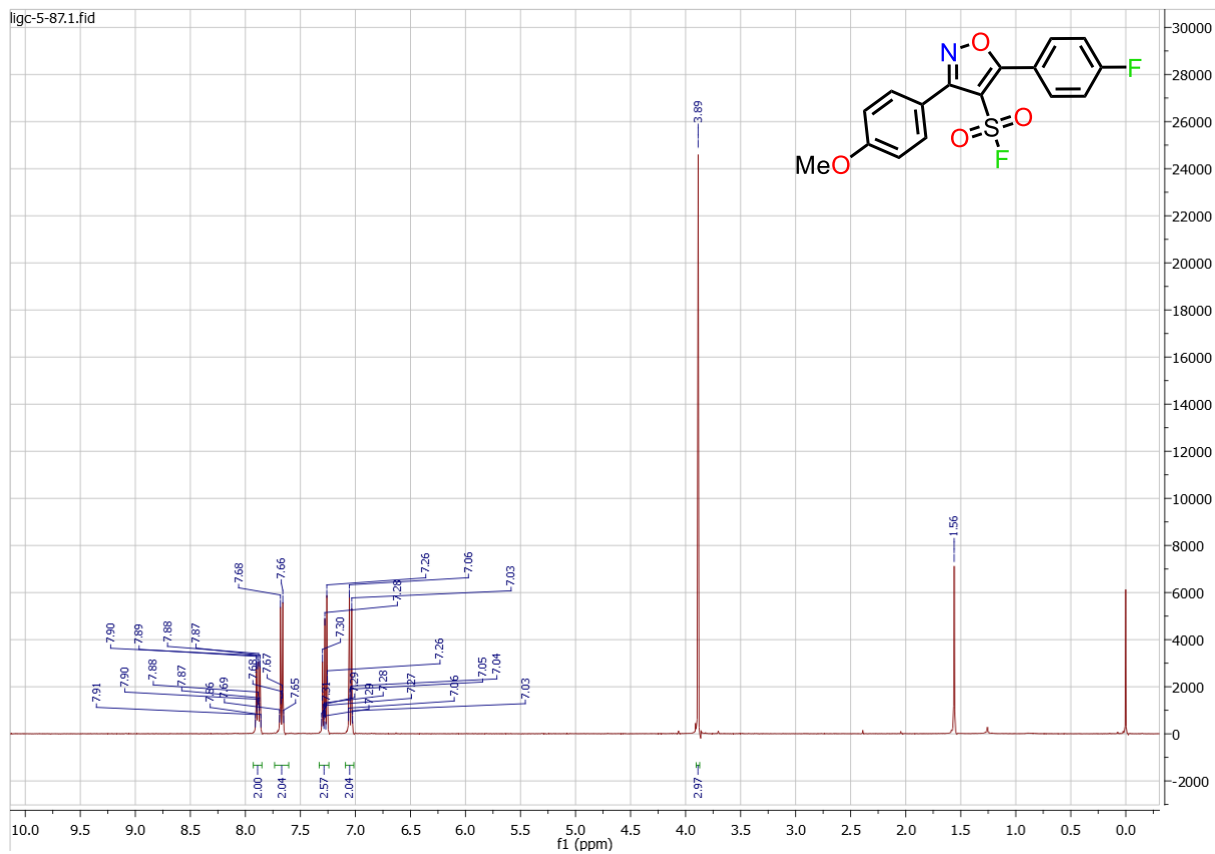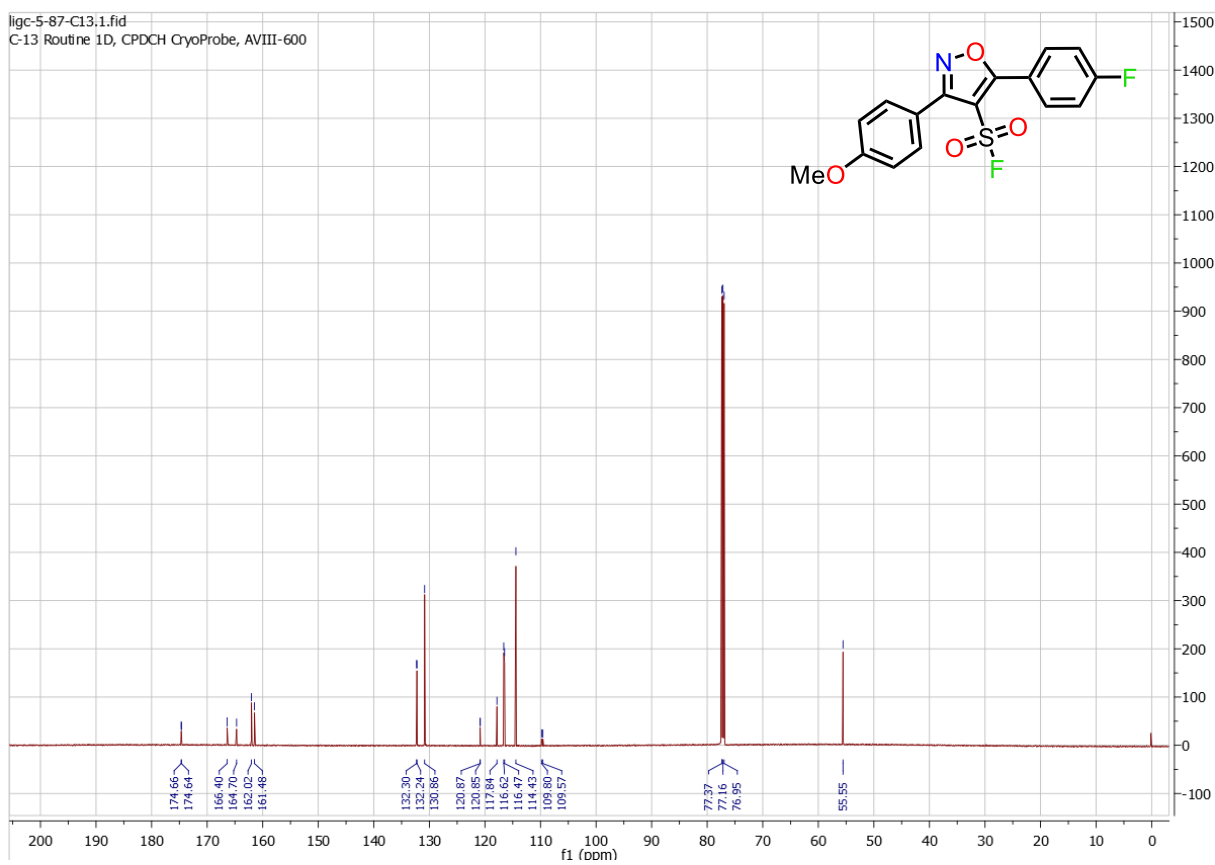

ligc-5-87-F.1.fid  
AV400 BBOF Probe, F-19 in CDCl3, CFCl3=0 ppm.

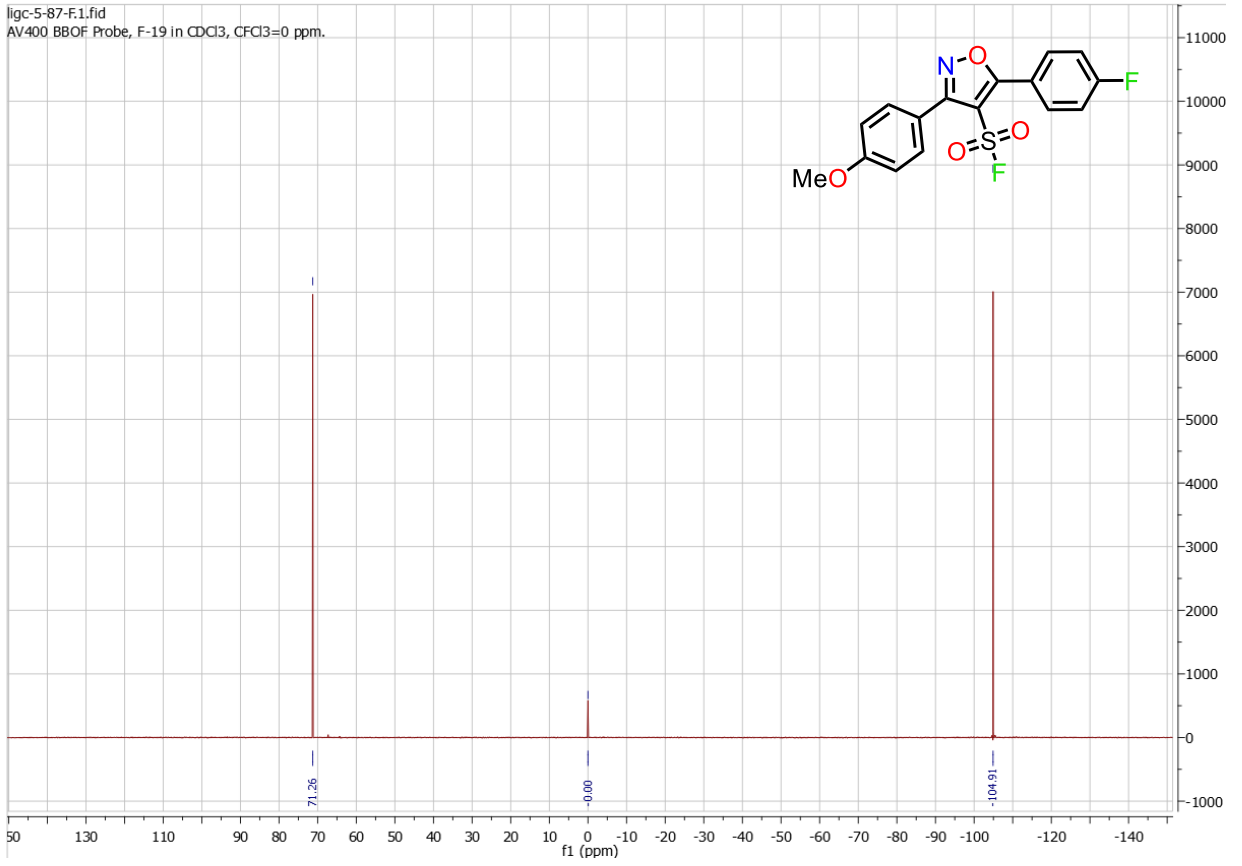

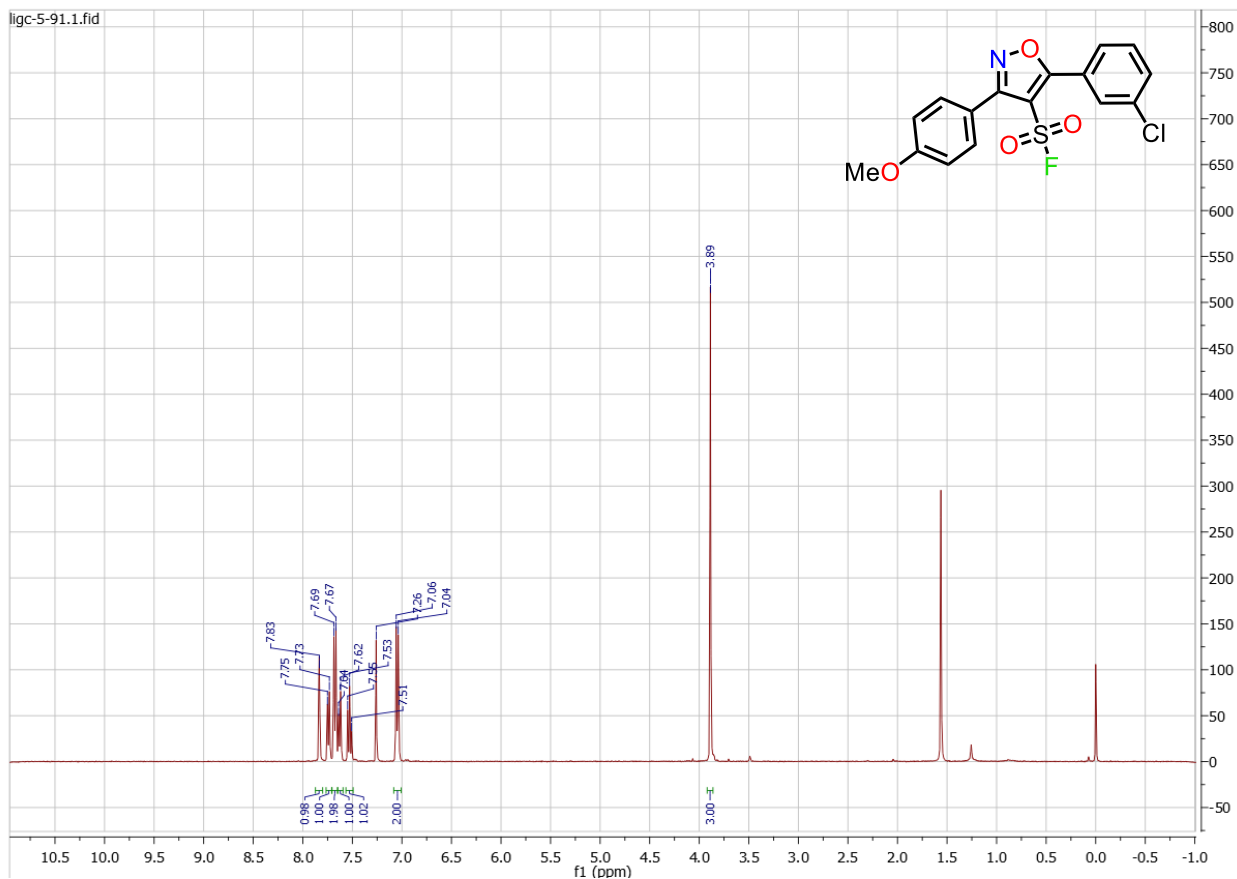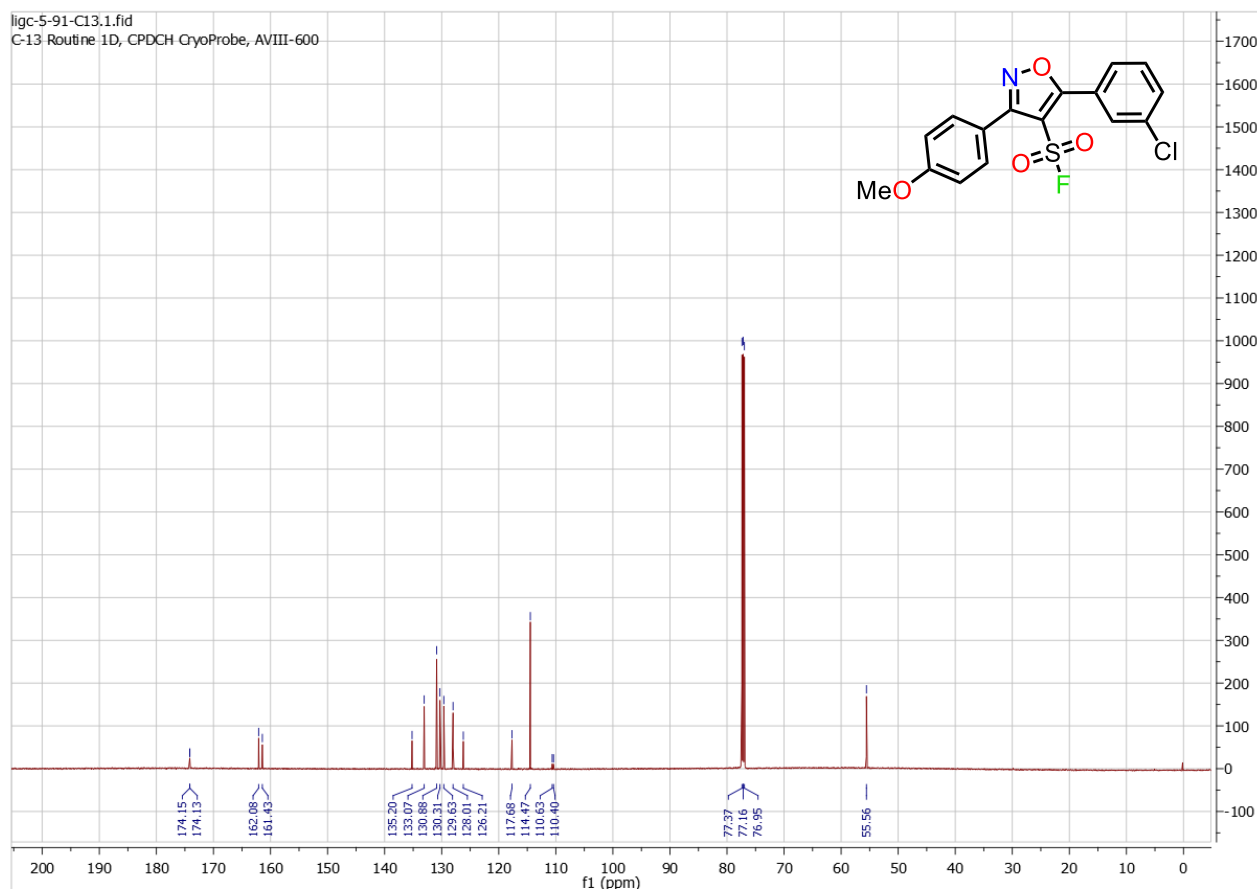

ligc-5-91-F1.fid  
F-19, CDCl3, DPX-400 QNP Probe. CF3Cl as Ref at 0 ppm.

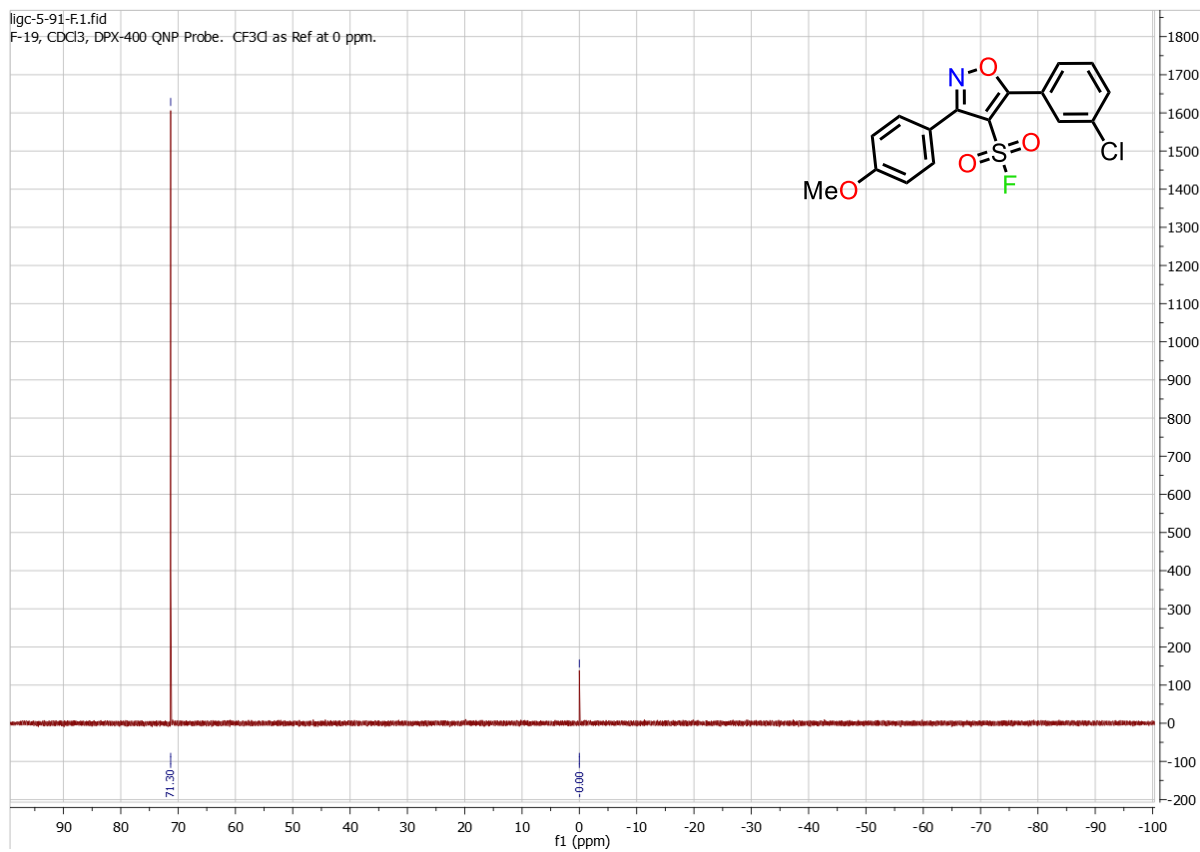

ligc-5-88-2-H.1.fid

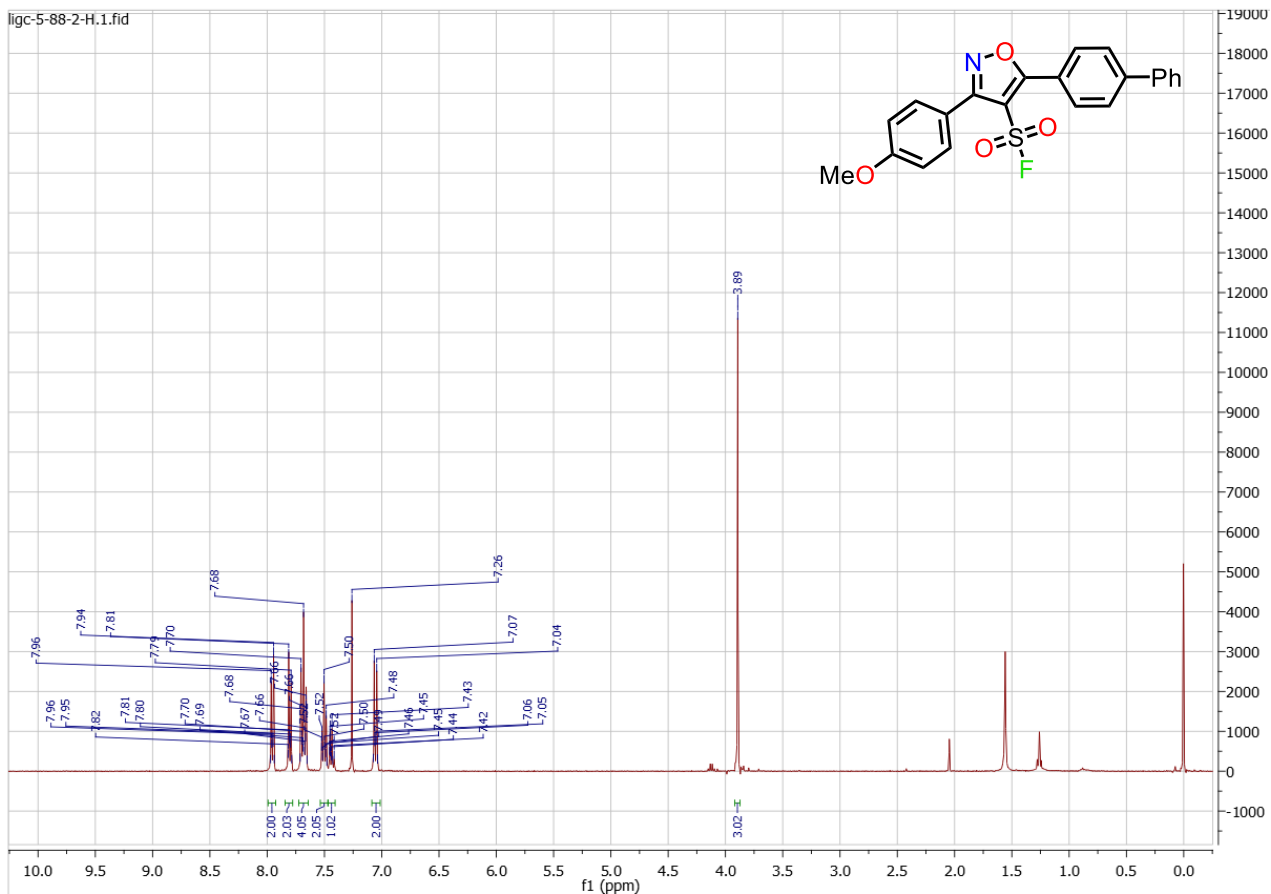

ligc-5-88-2-C13.1.fid

C-13 Routine 1D, CPDCH CryoProbe, AVIII-600

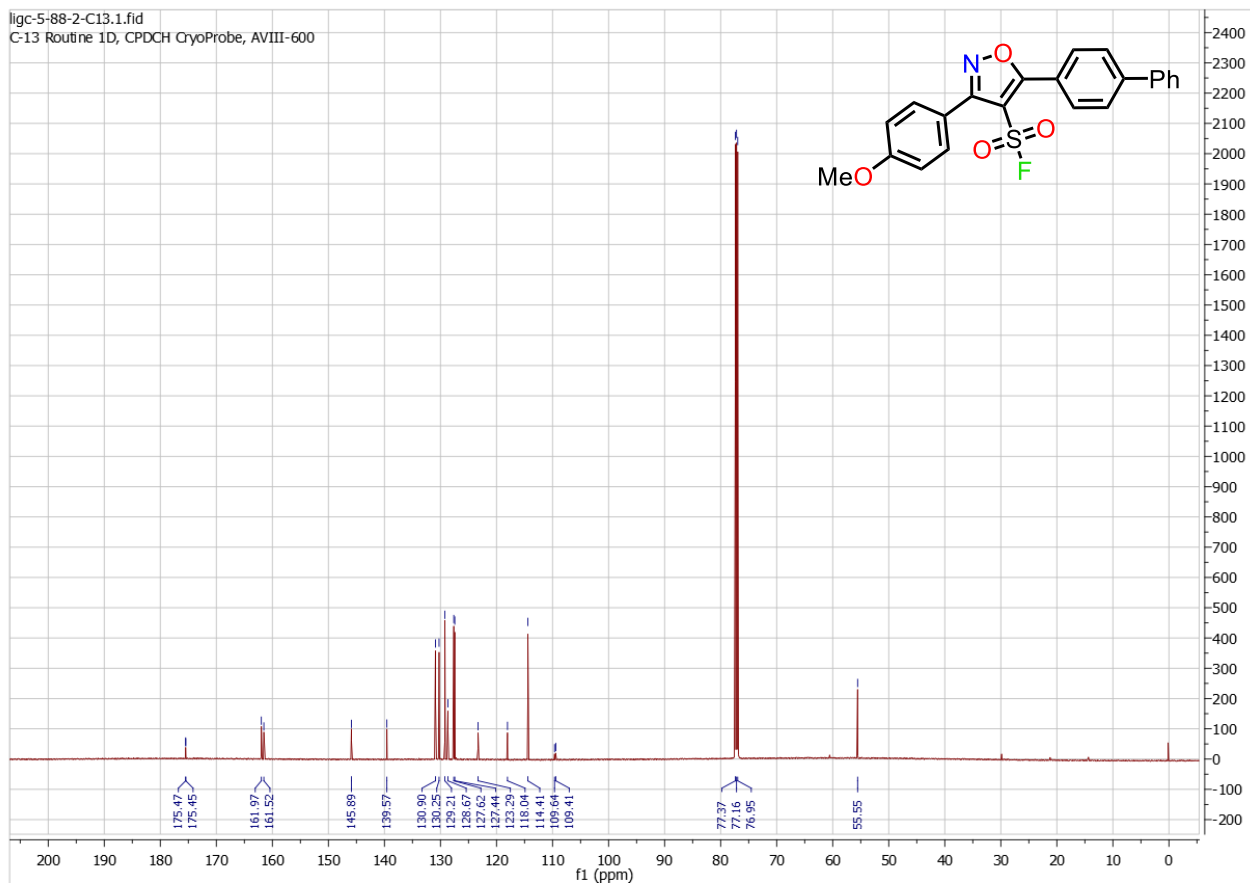

ligc-5-88-2-F.1.fid  
AV400 BBOF Probe, F-19 in CDCl<sub>3</sub>, CFCl<sub>3</sub>=0 ppm.

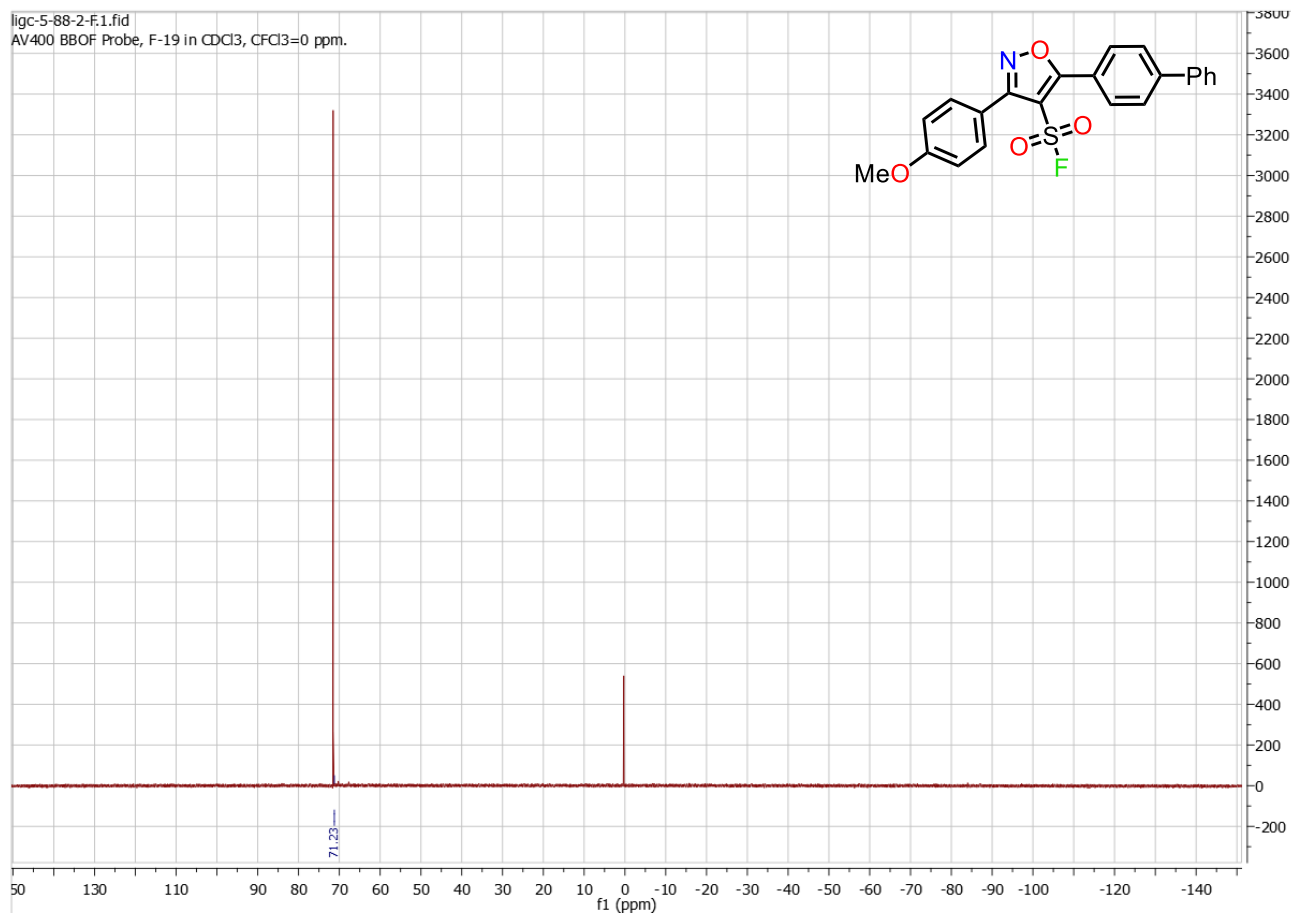

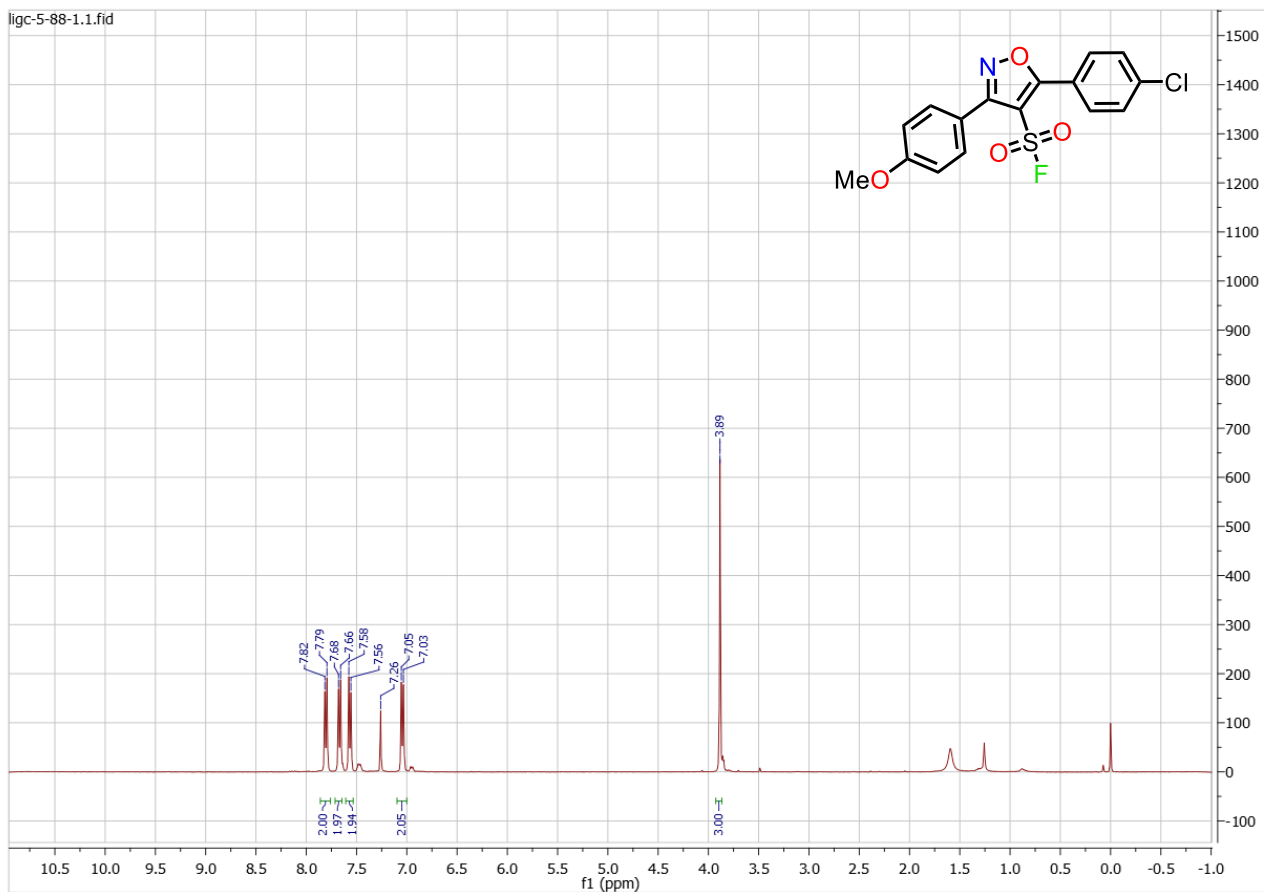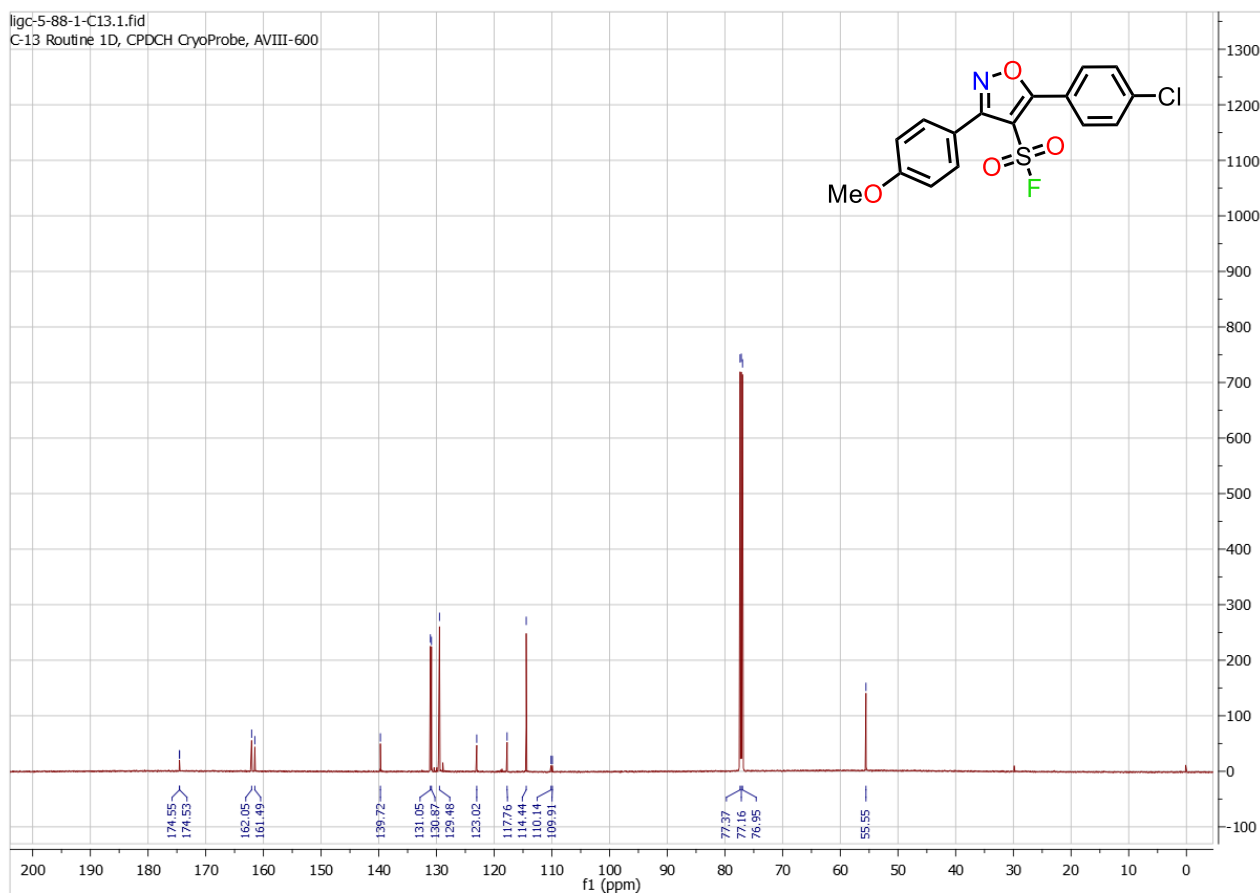



ligc-5-88-1-F1.fid  
F-19, CDCl3, DPX-400 QNP Probe. CF3Cl as Ref at 0 ppm.

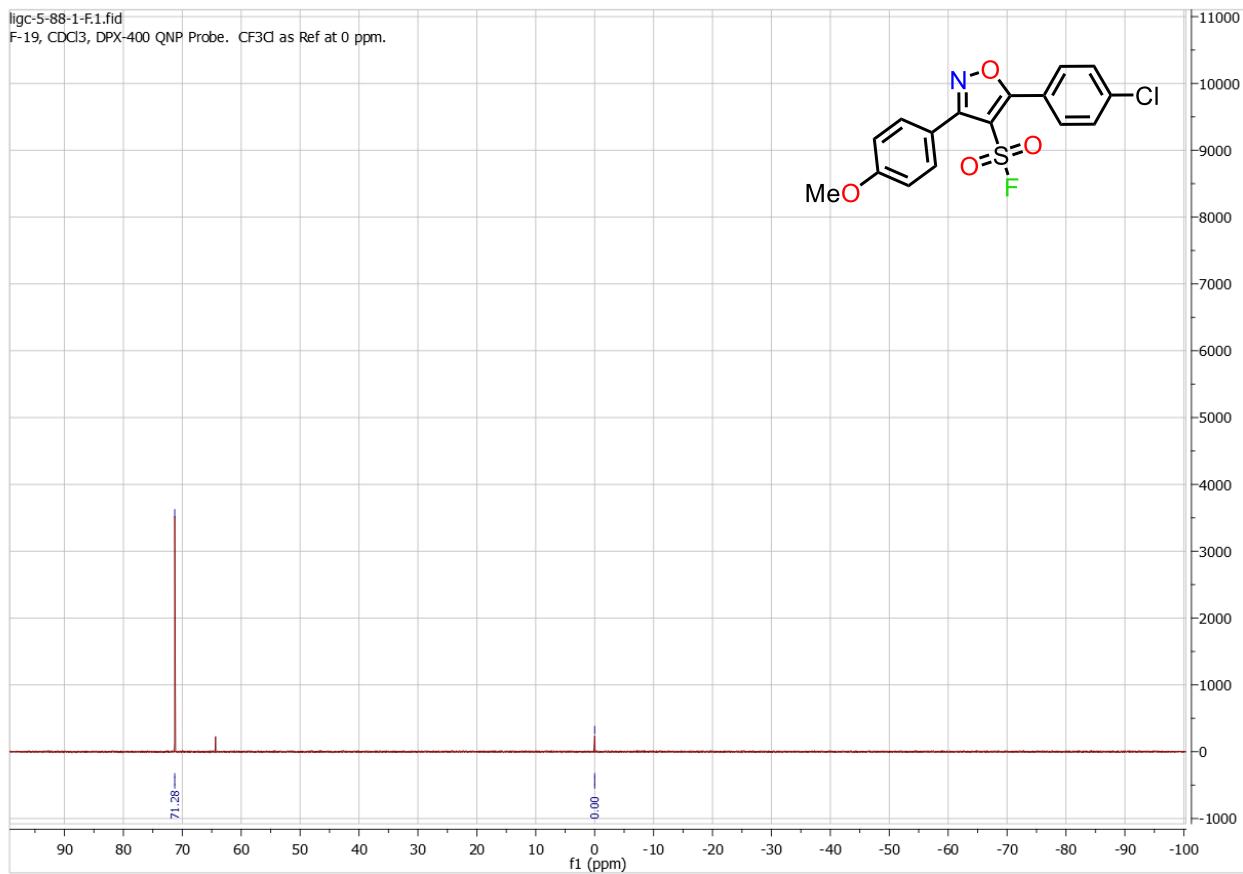

ligc-5-86.1.fid

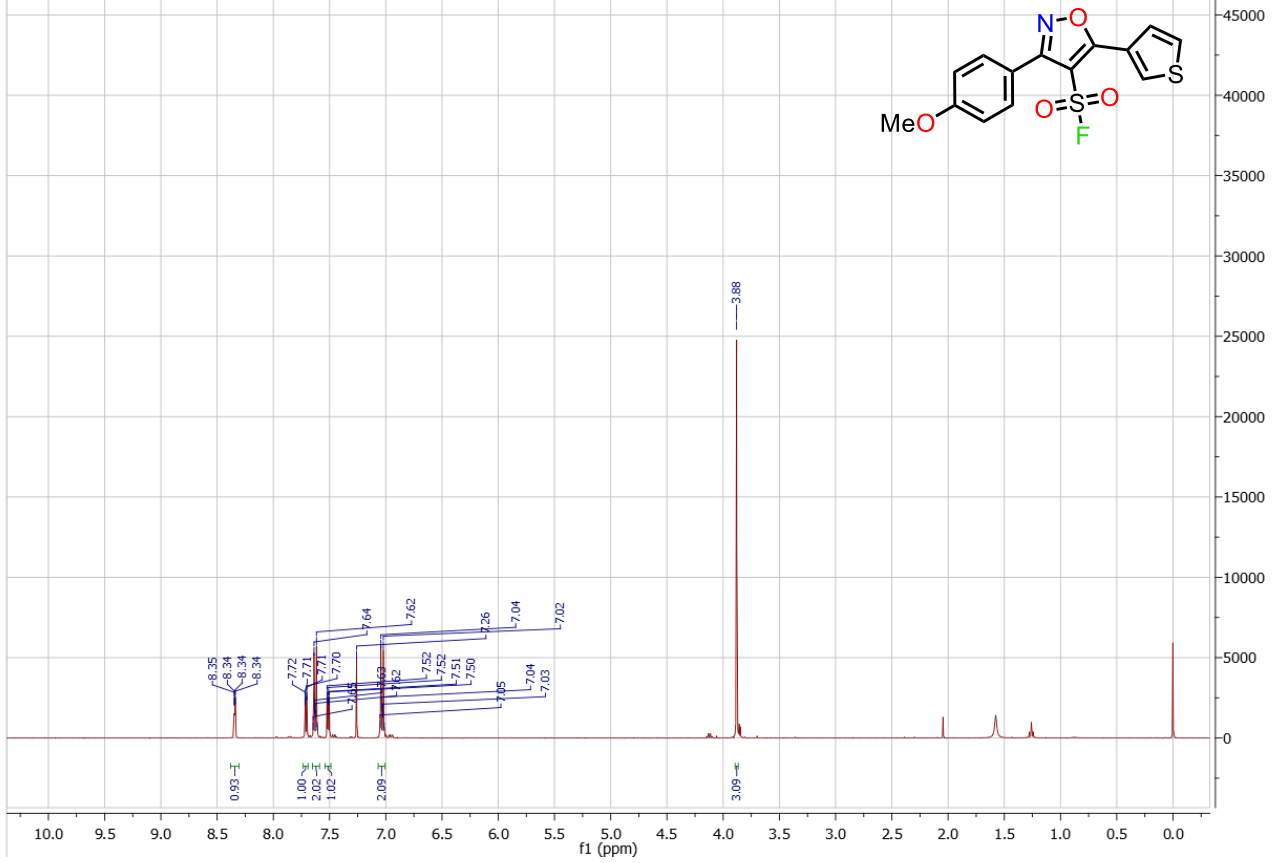

ligc-5-86-C13.1.fid

C-13 Routine 1D, CPDCH CryoProbe, AVIII-600

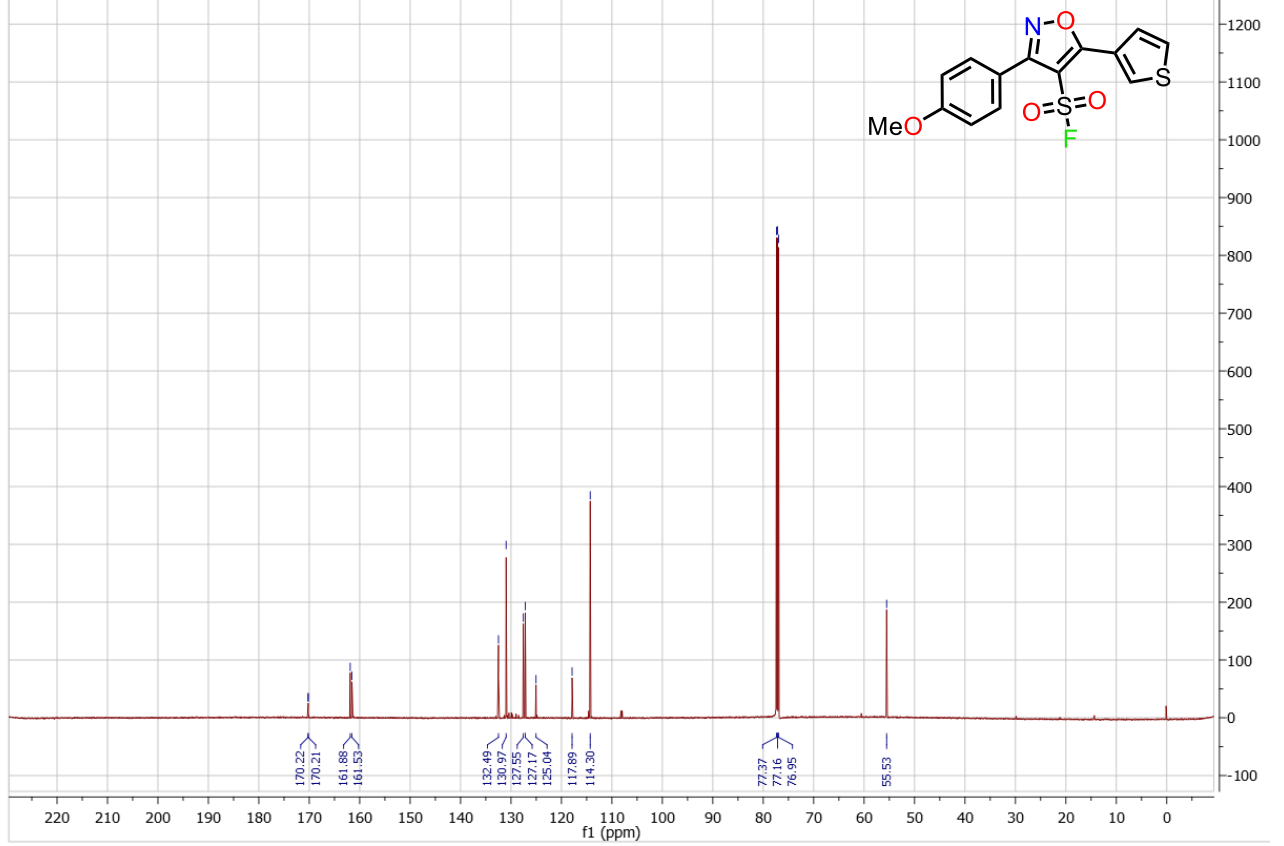

ligc-5-86-F1.fid  
AV400 BBOF Probe, F-19 in CDCl3, CFCl3=0 ppm.

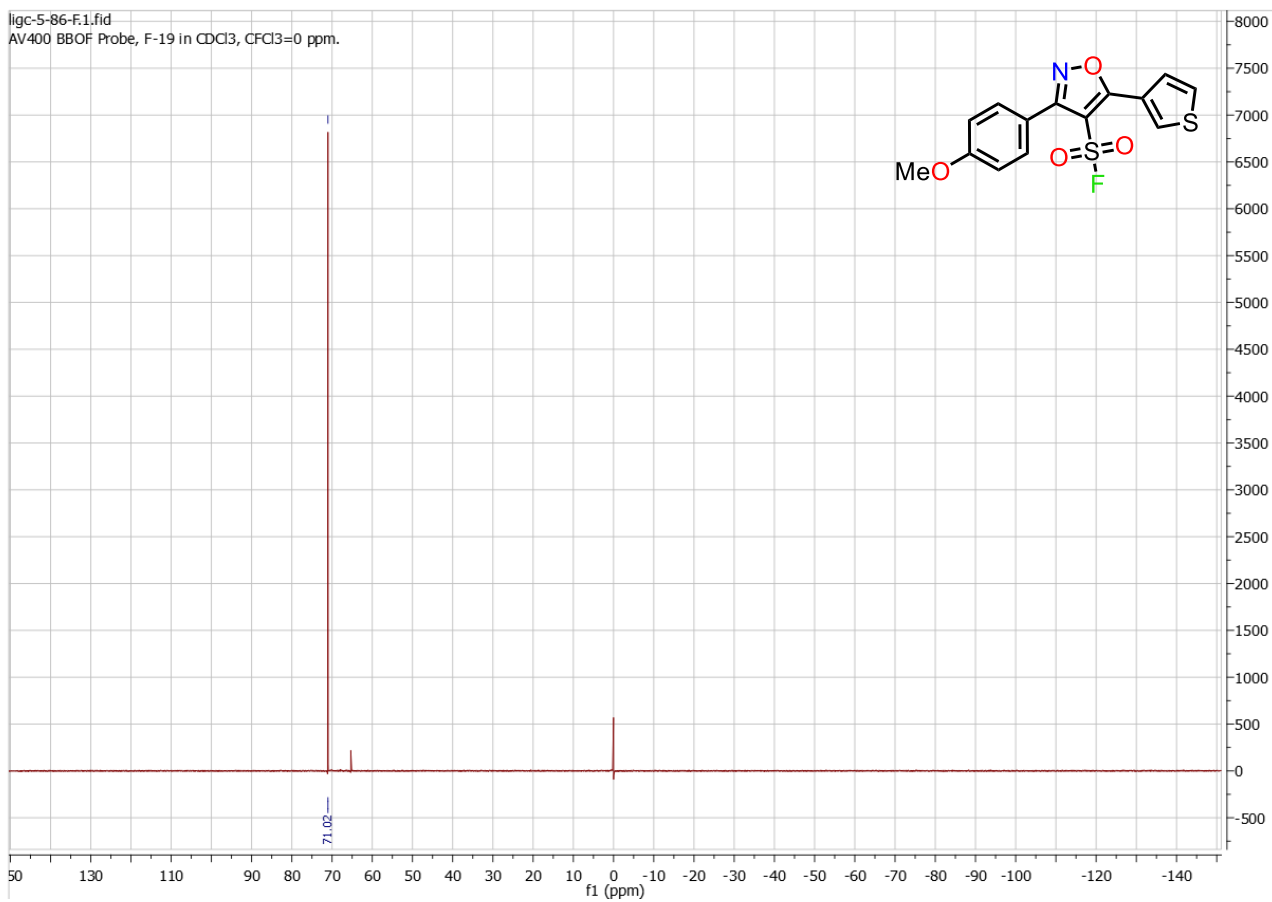

csi-344-data.1.fid  
H1\_standard CDCl3 [C:\Users\chemistry400\Dropbox (LIMS)\LIMS 400MHz\csmedley\dropbox400 58

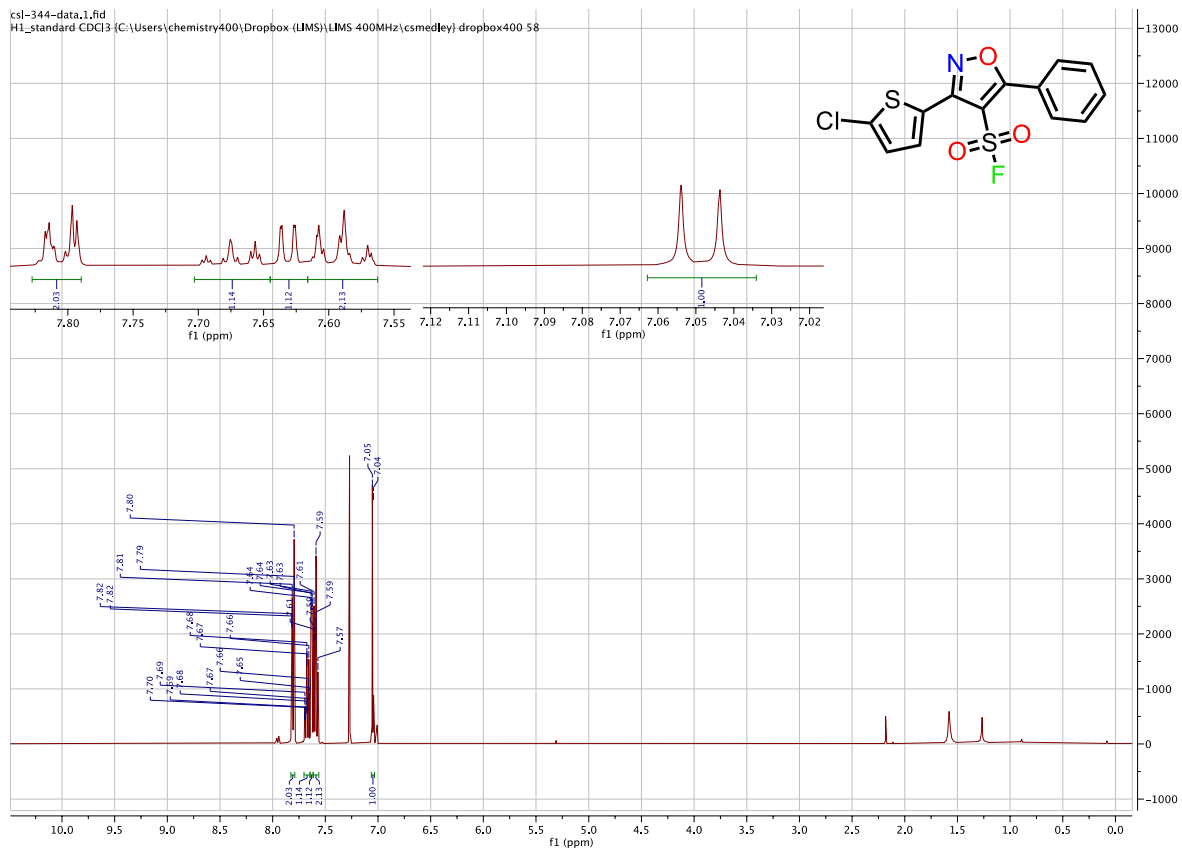

csi-344-data.3.fid  
13C CDCl3 [C:\Users\chemistry400\Dropbox (LIMS)\LIMS 400MHz\csmedley\dropbox400 58

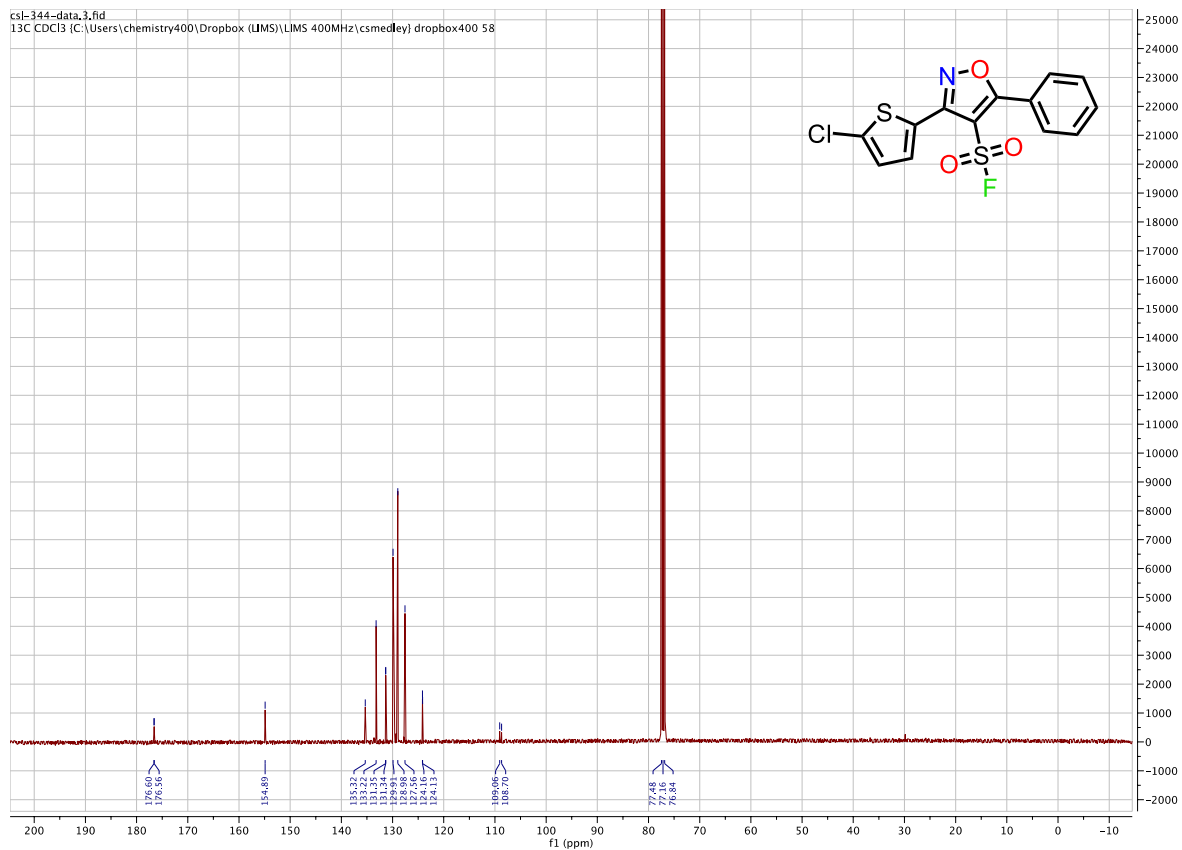

csi-344--data,2.fid  
(F-19 standard) CDCl<sub>3</sub> (C:\Users\chemistry400\Dropbox (LIMS)\LIMS 400MHz\csmedley\ dropbox400 58

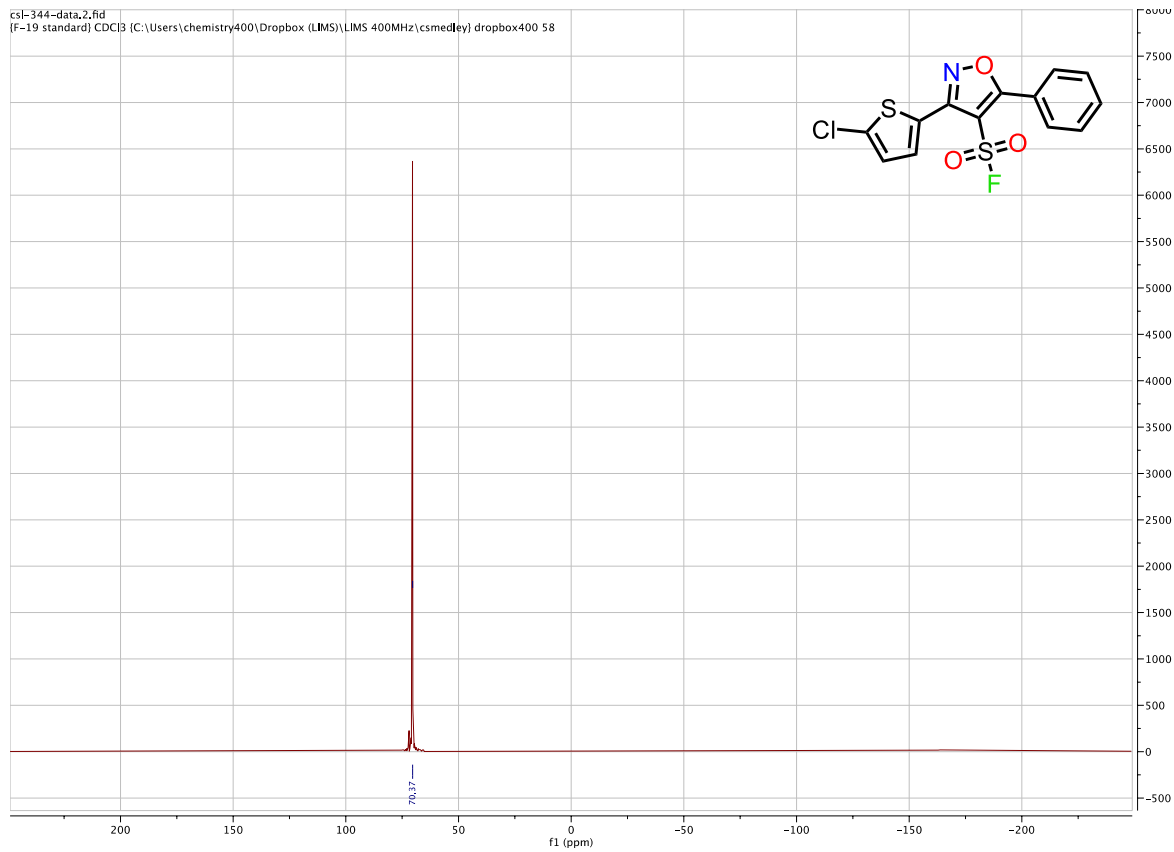

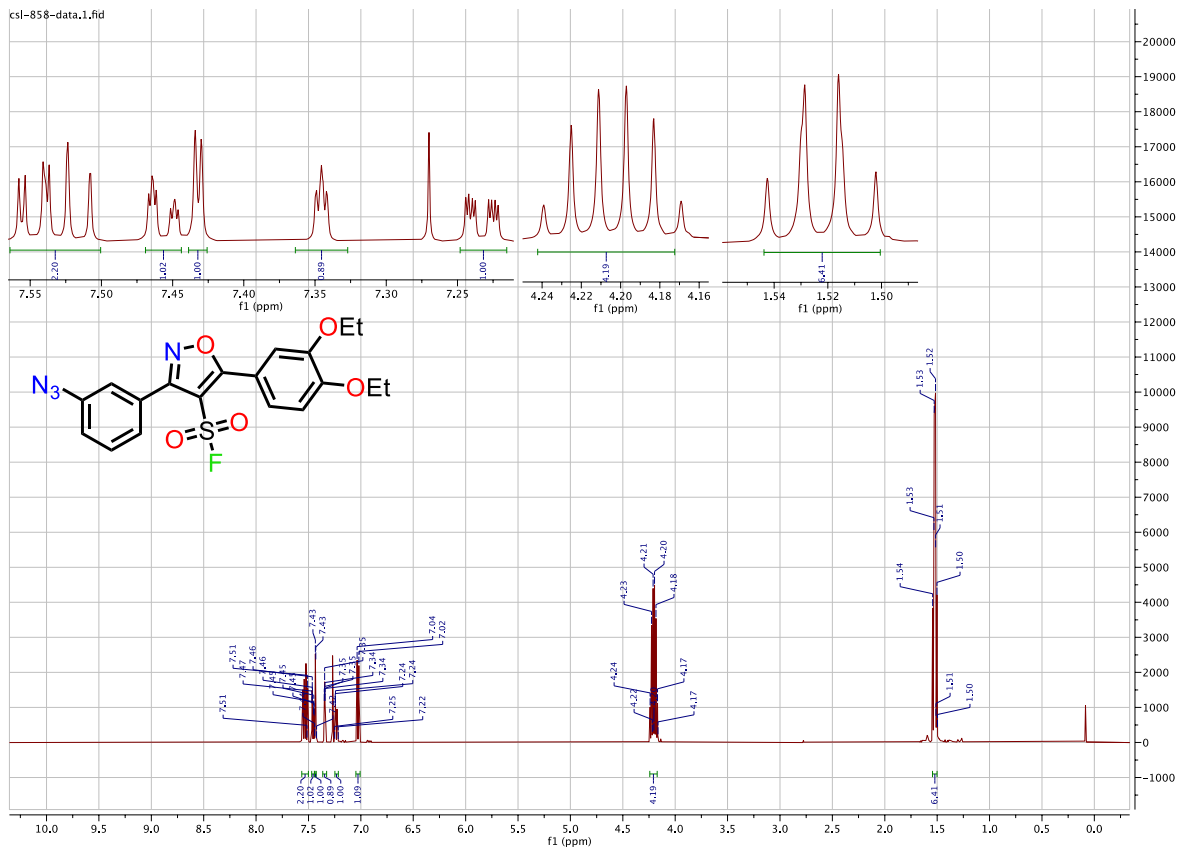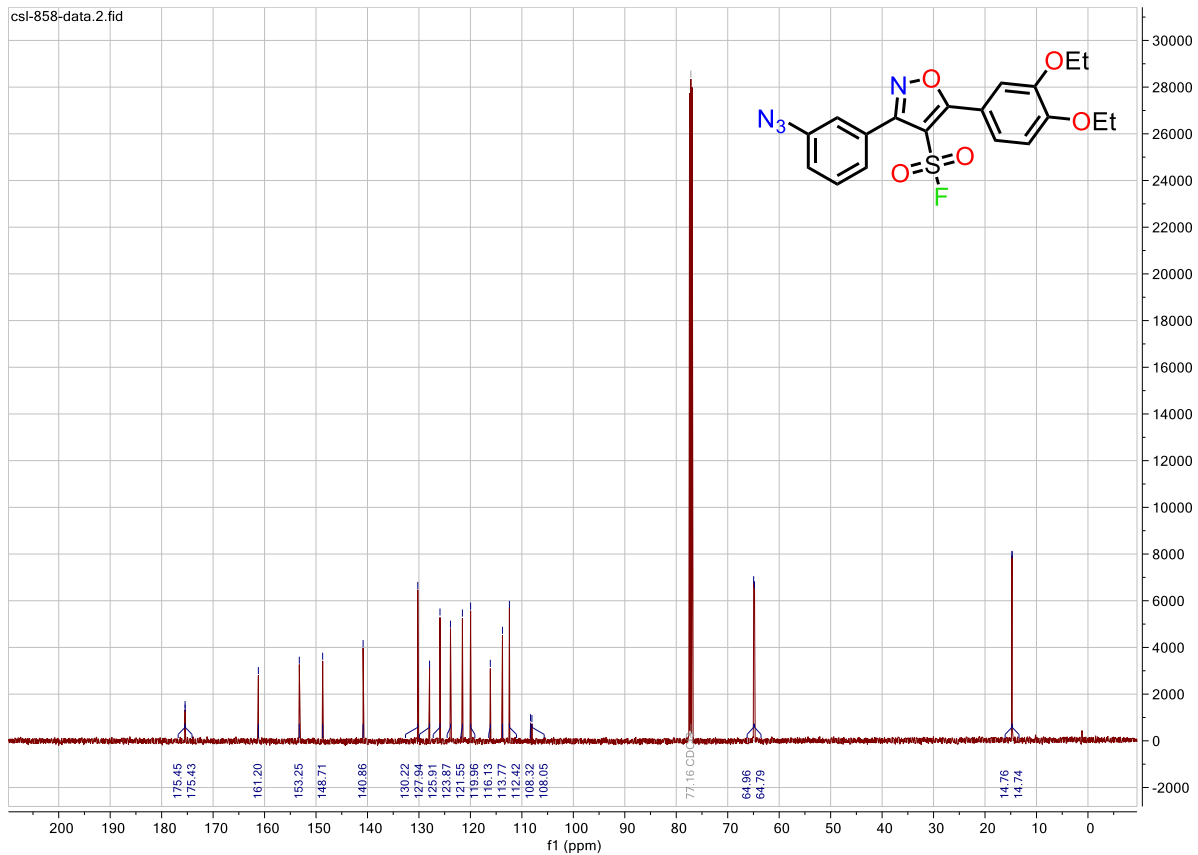

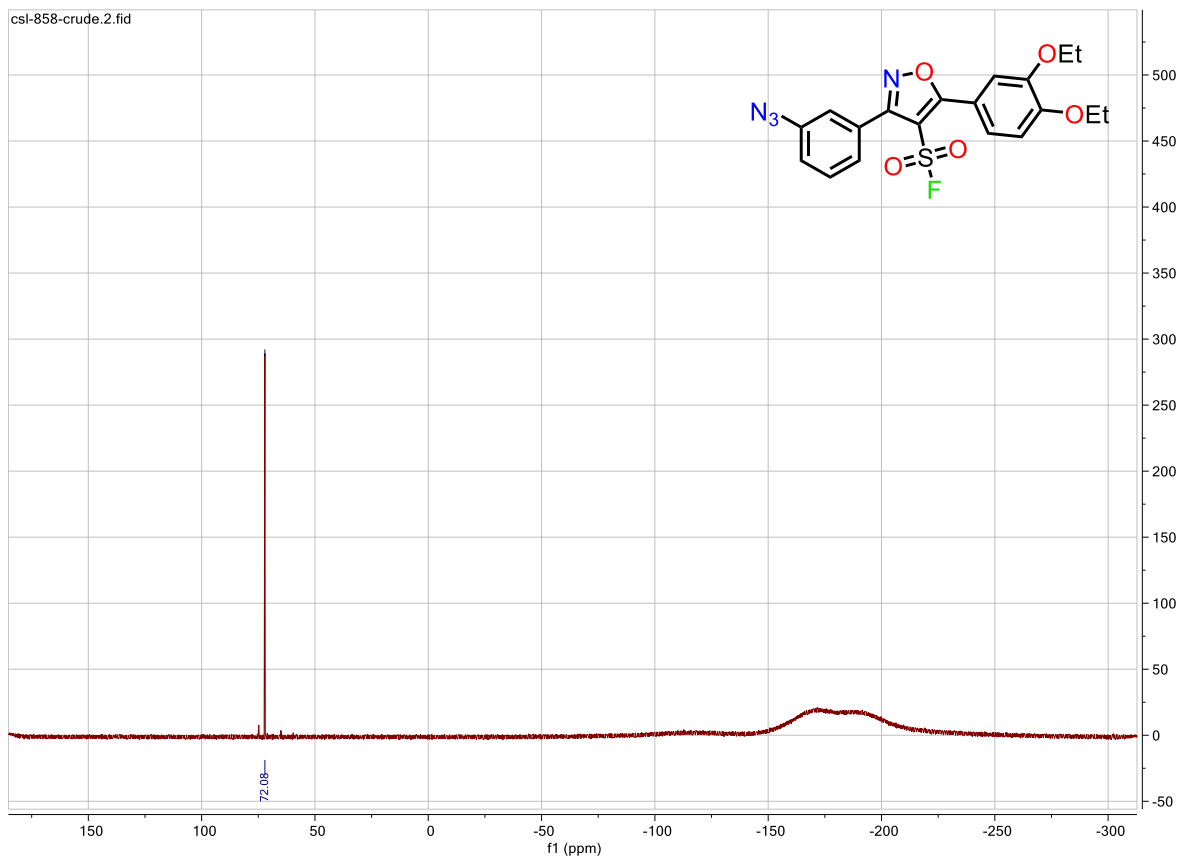

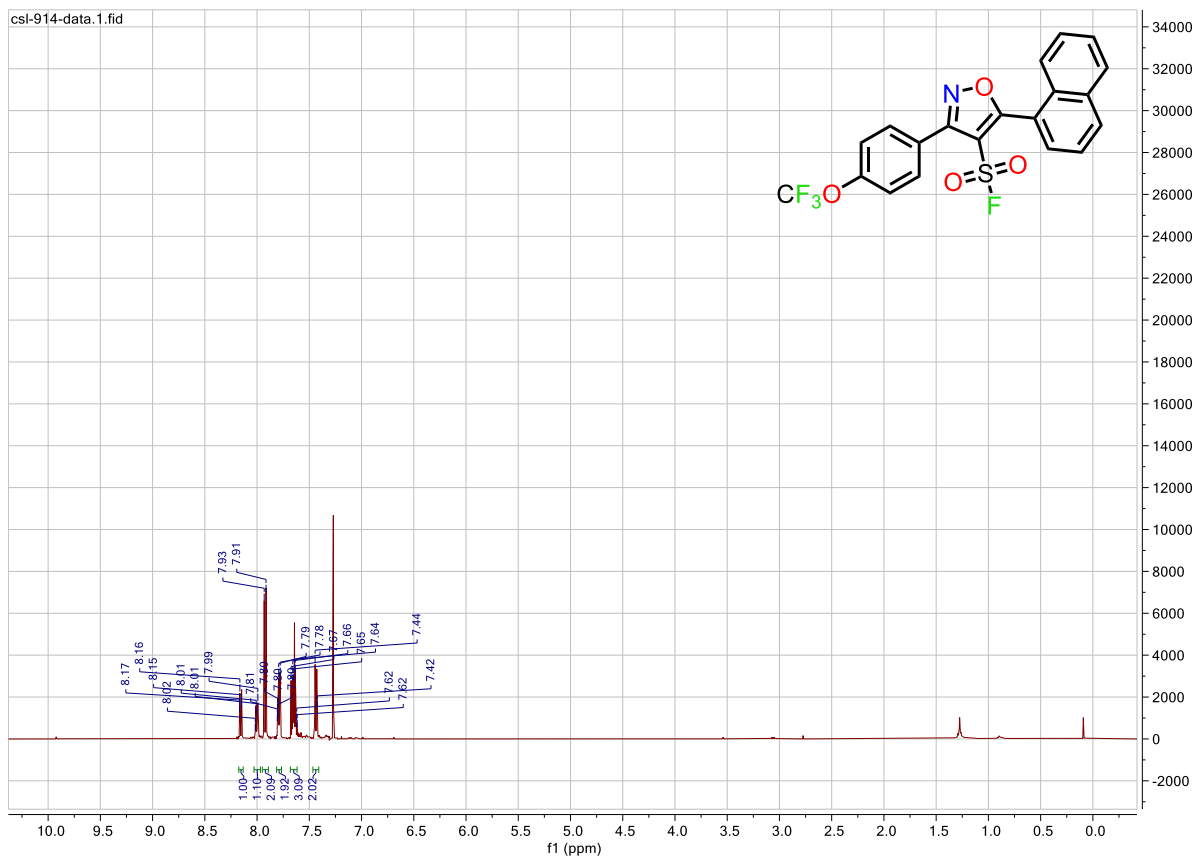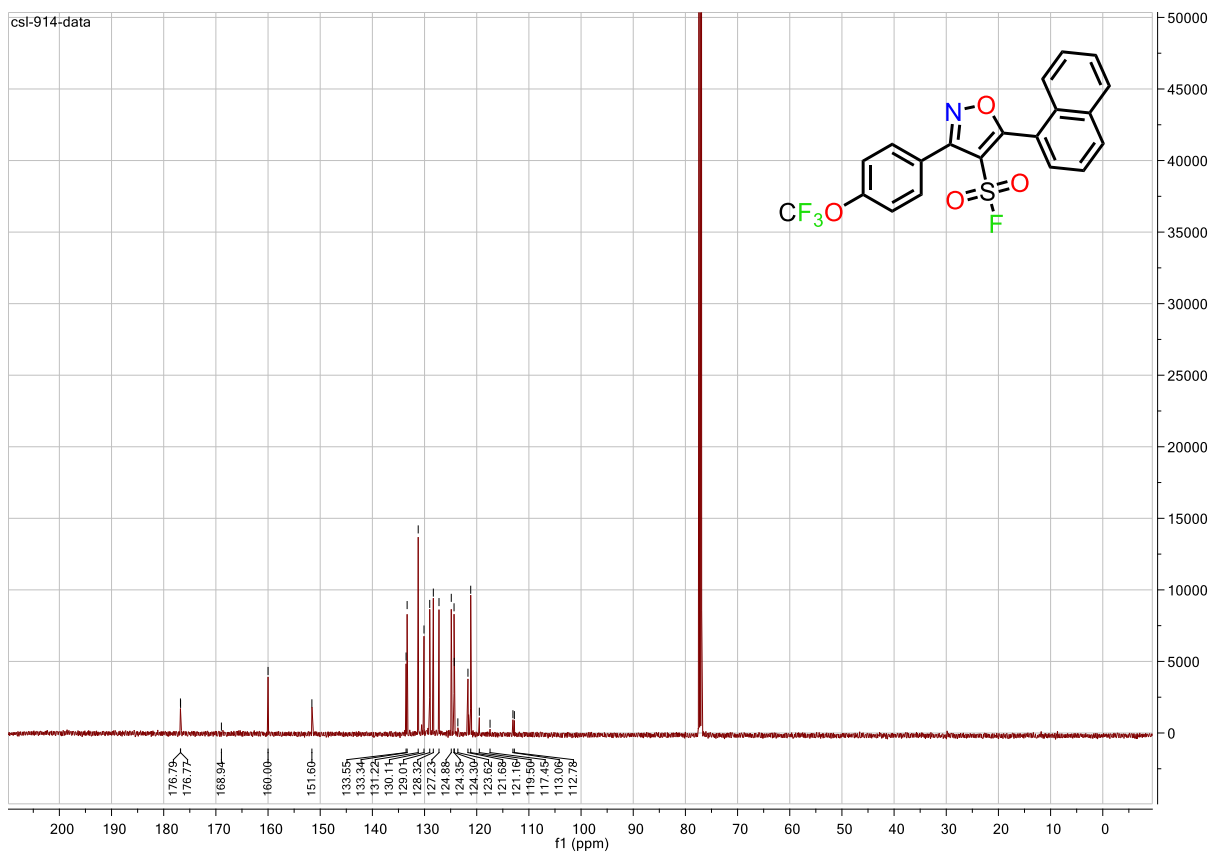



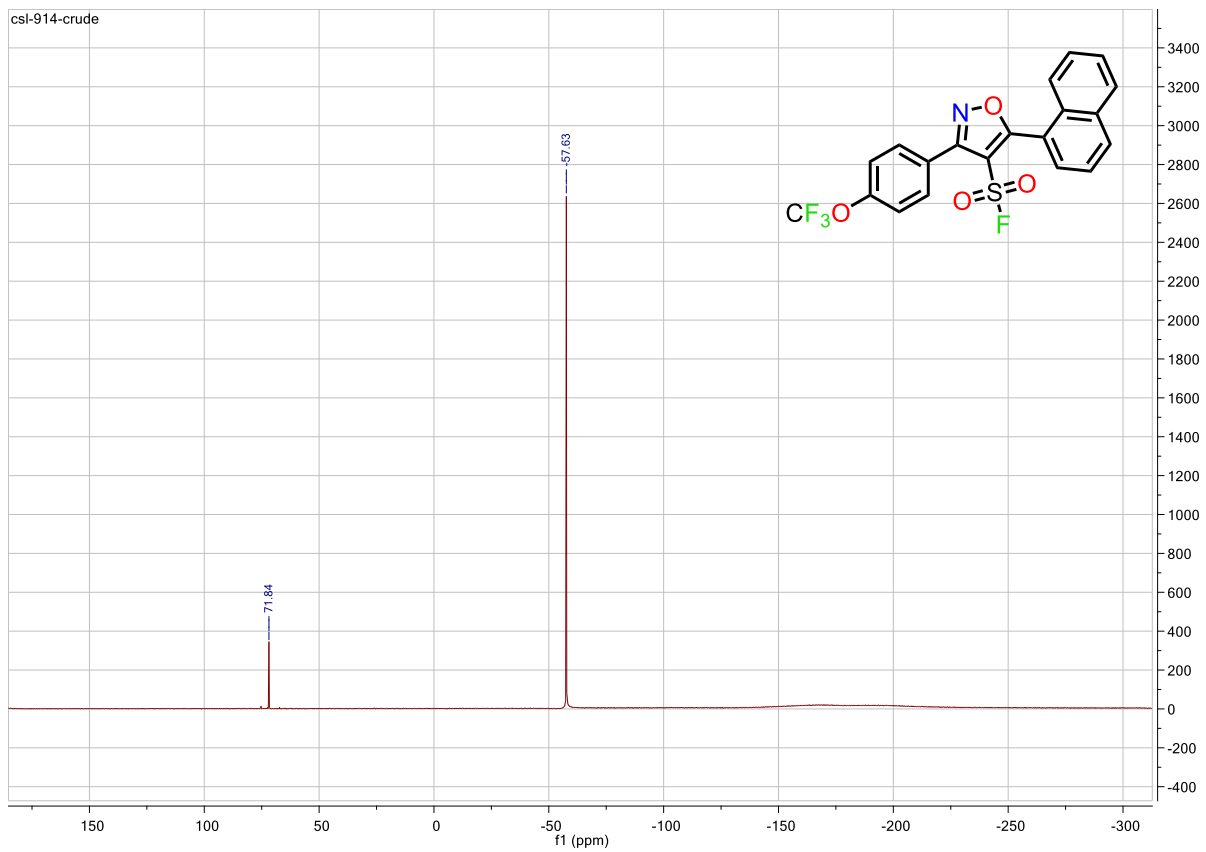

csi-913-data.1.fid

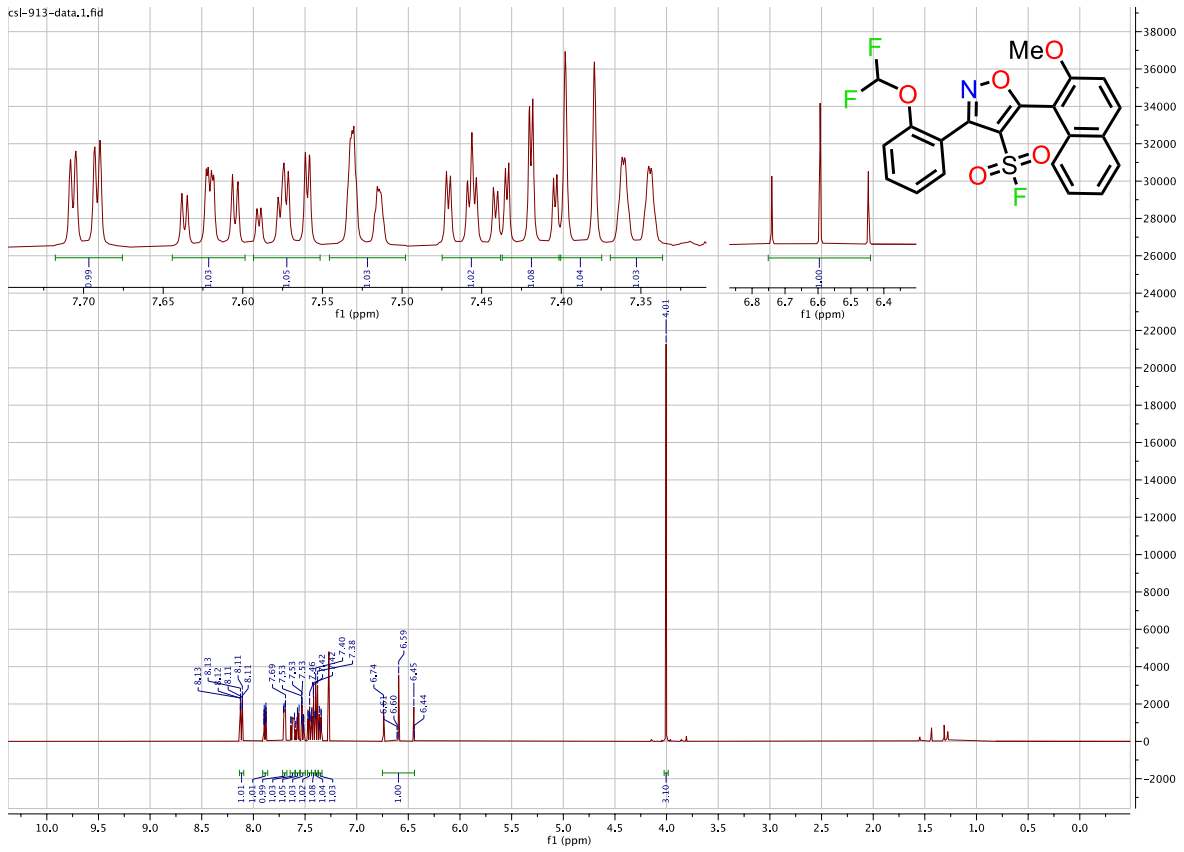

csi-913-data.2.fid

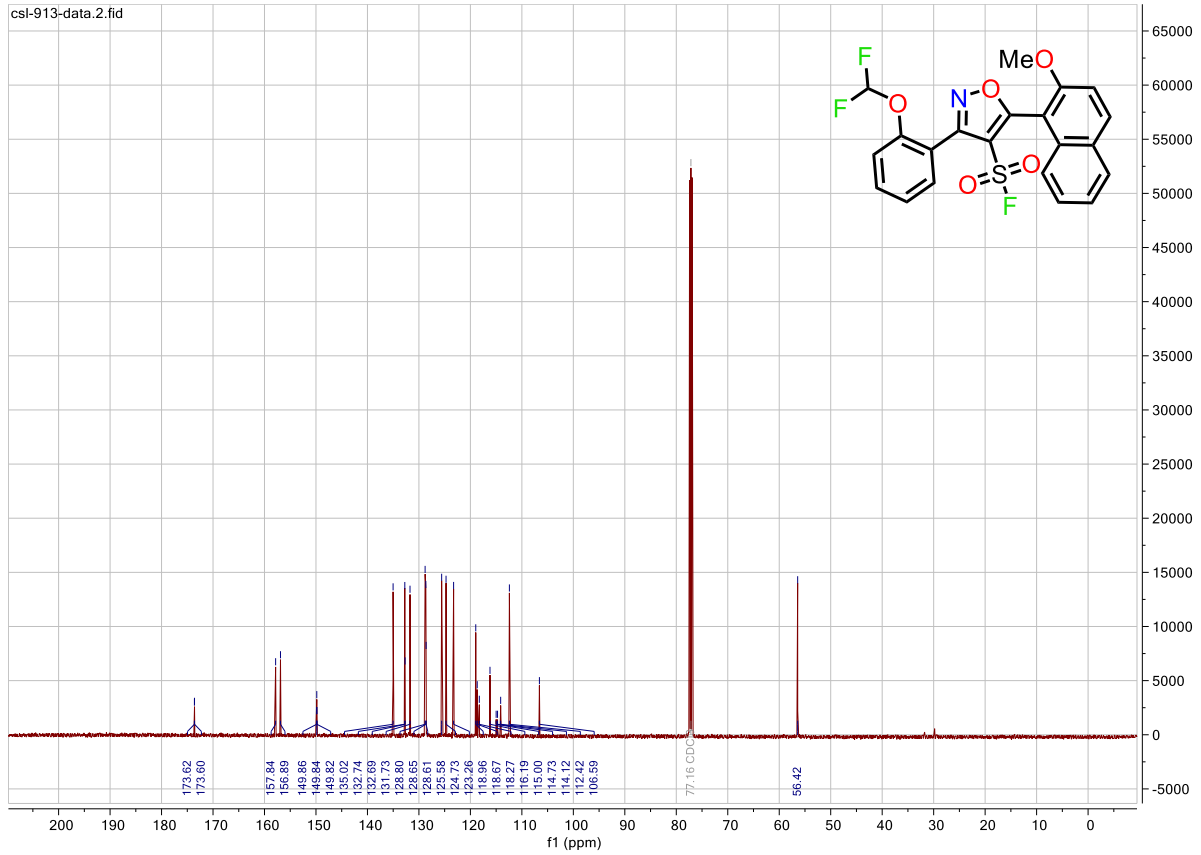

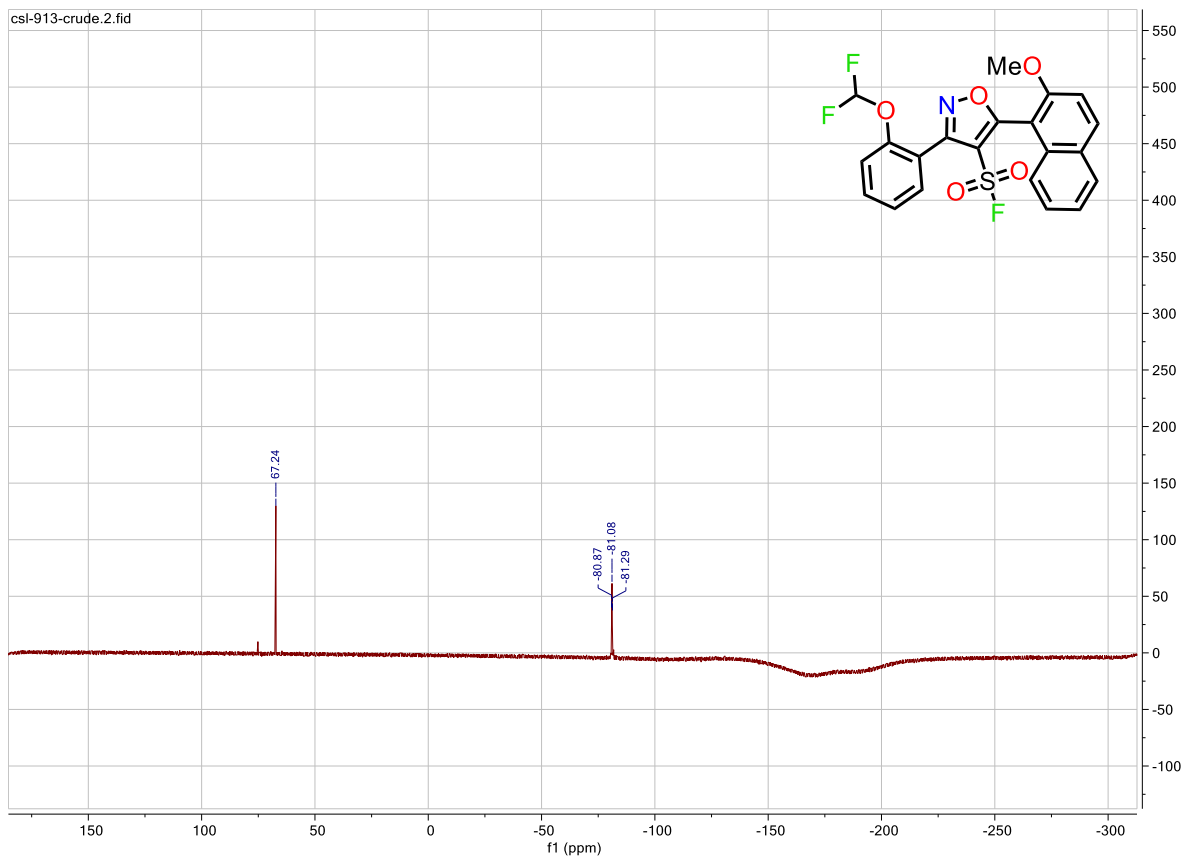

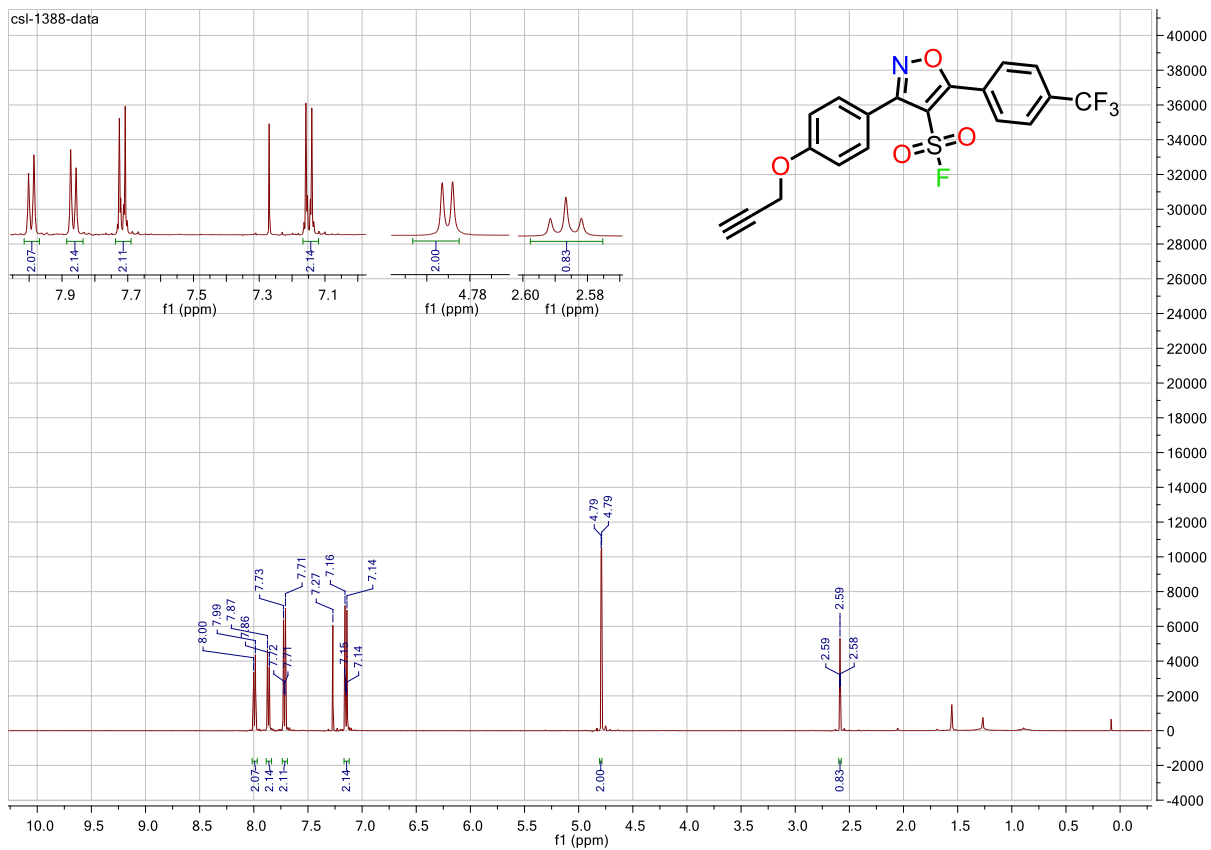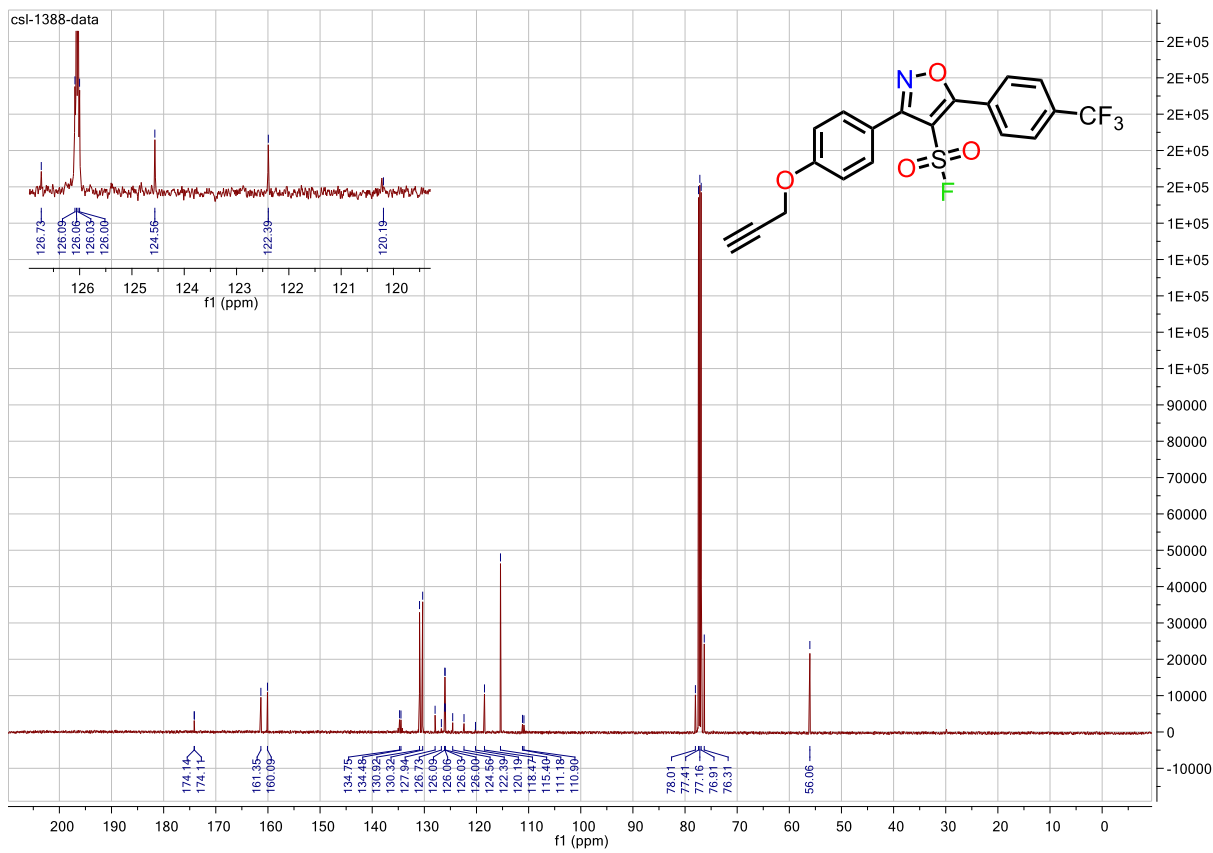

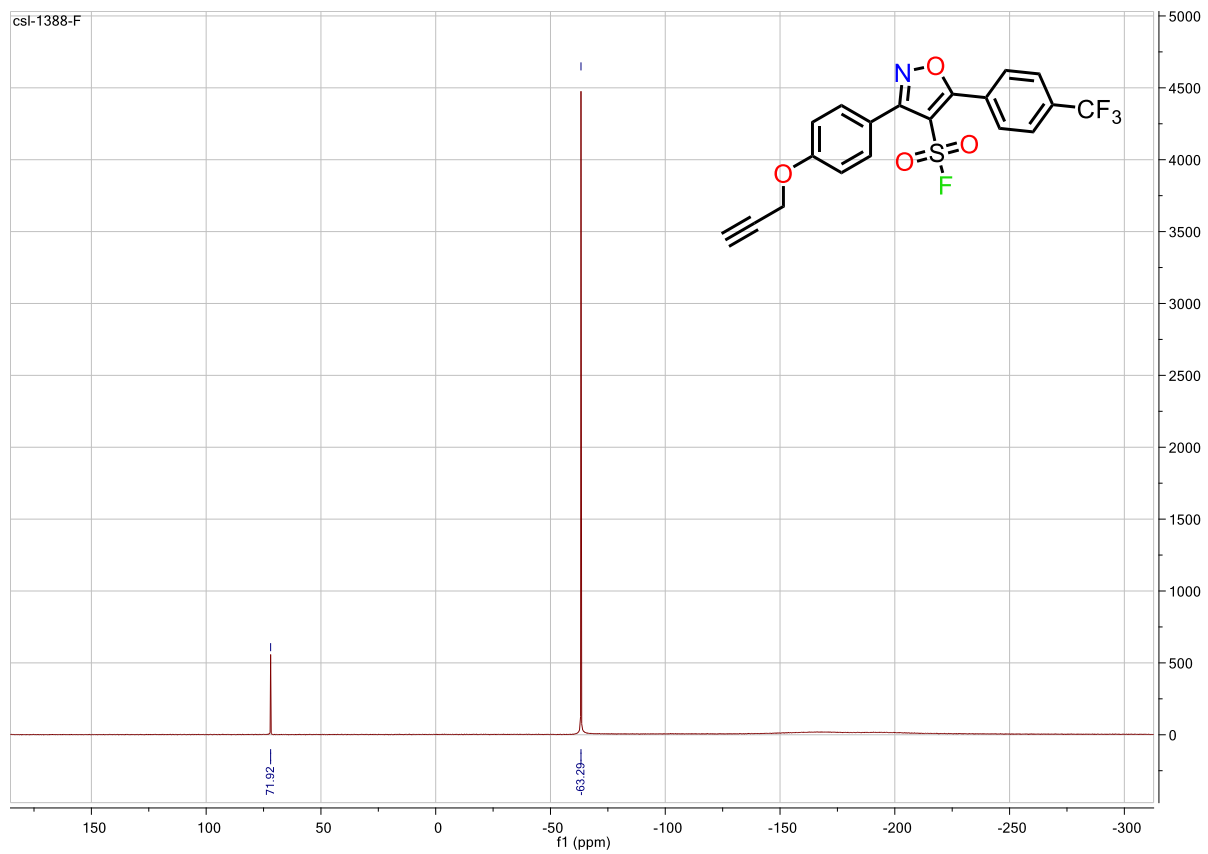

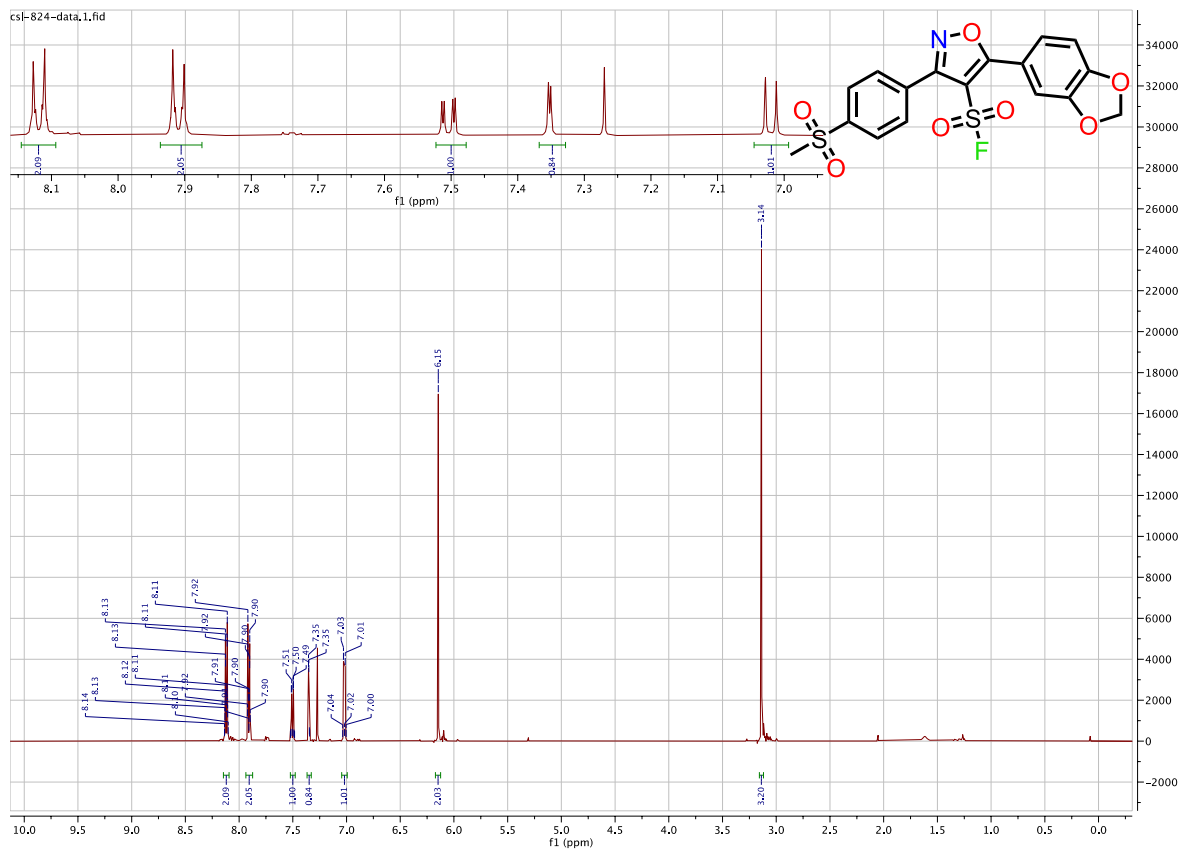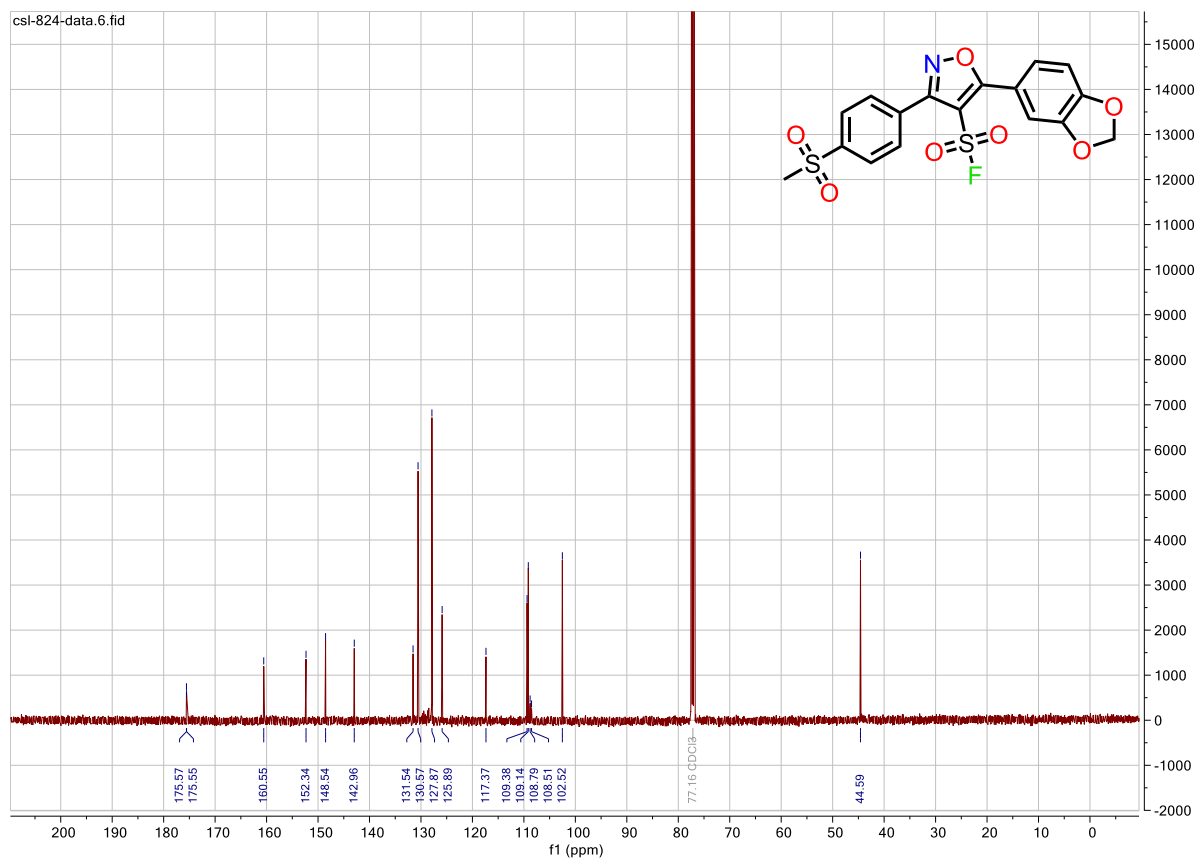

csi-824-crude.2.fid

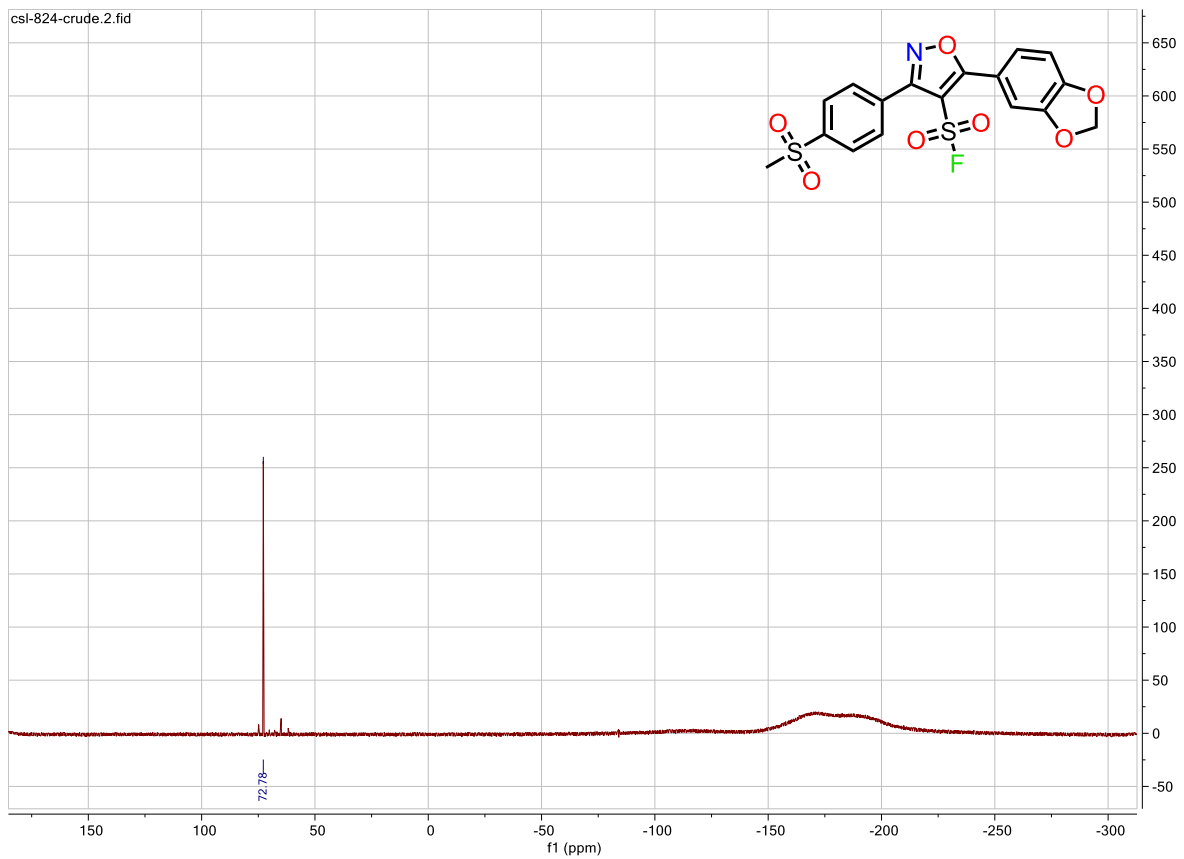

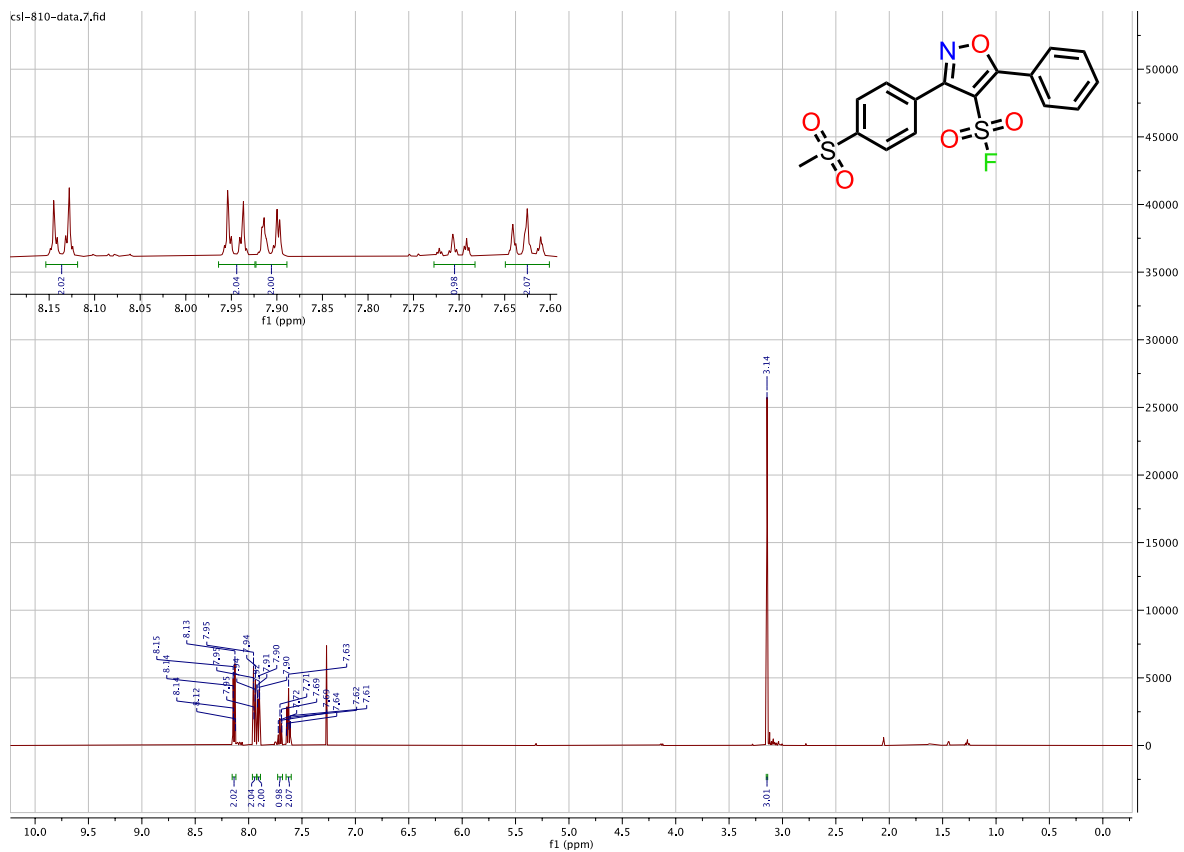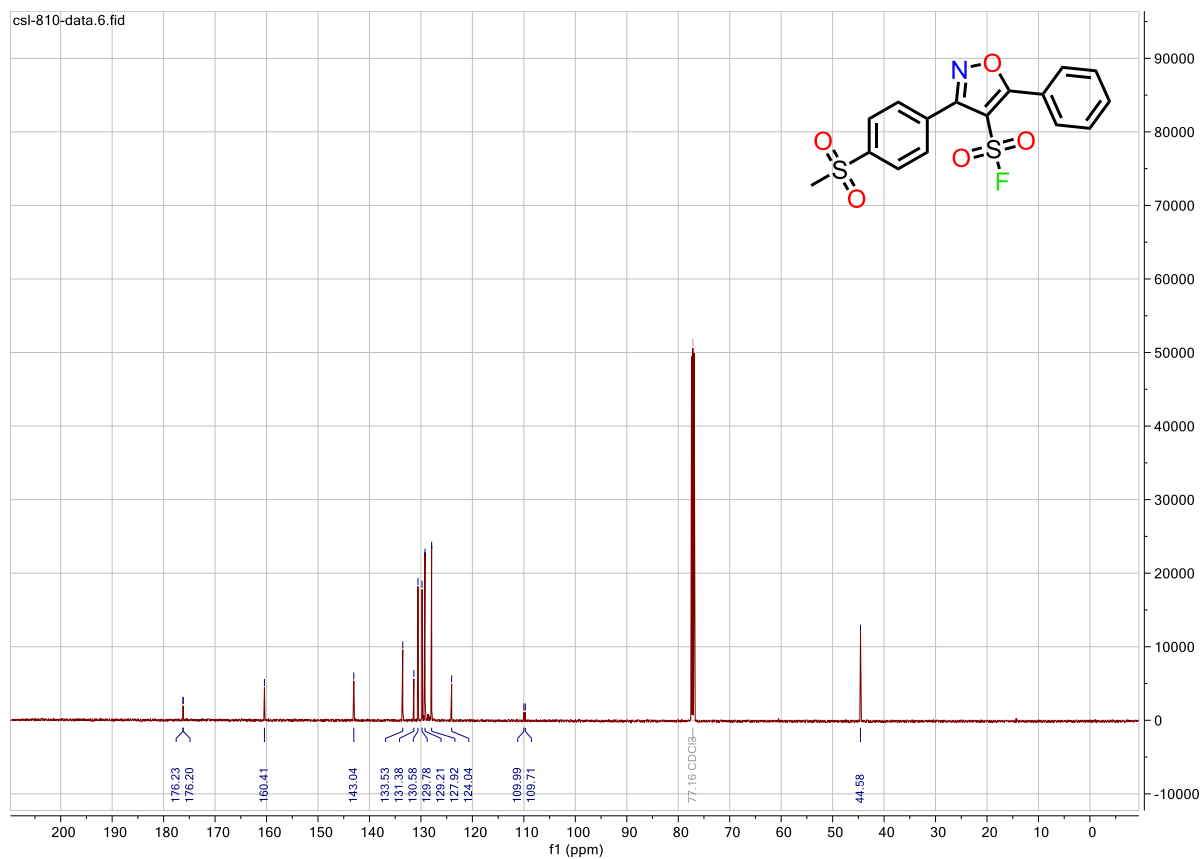



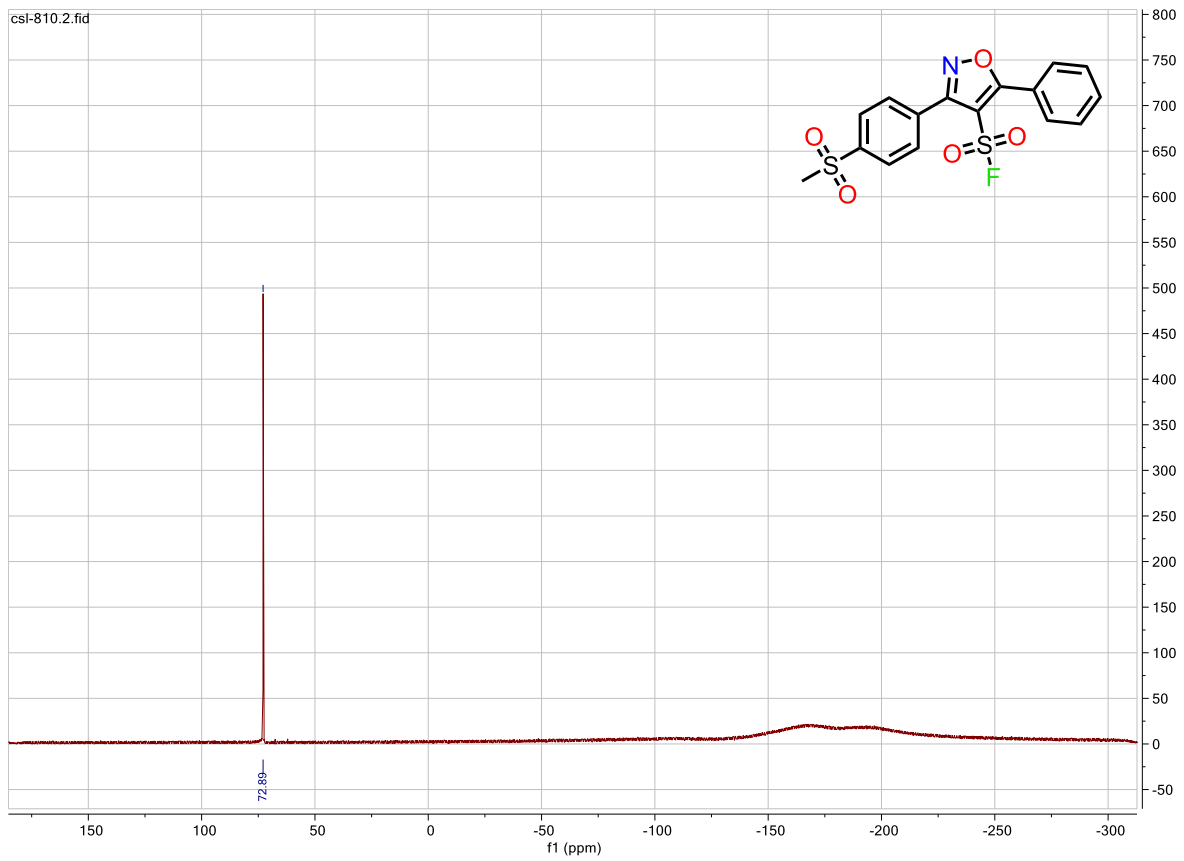



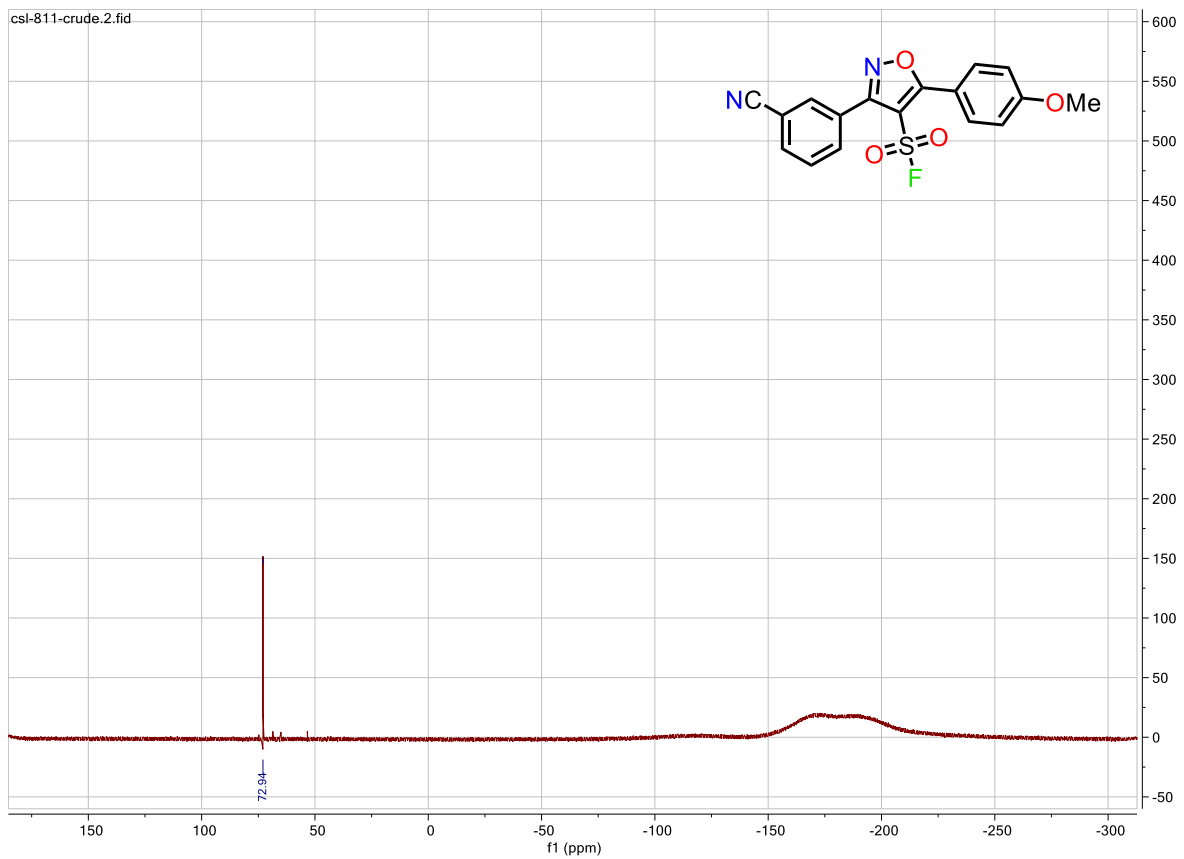

csi-343-data\_1.fid  
H1\_standard CDCl3 [C:\Users\chemistry400\Dropbox (LIMS)\LIMS 400MHz\csmedley\ dropbox400 55

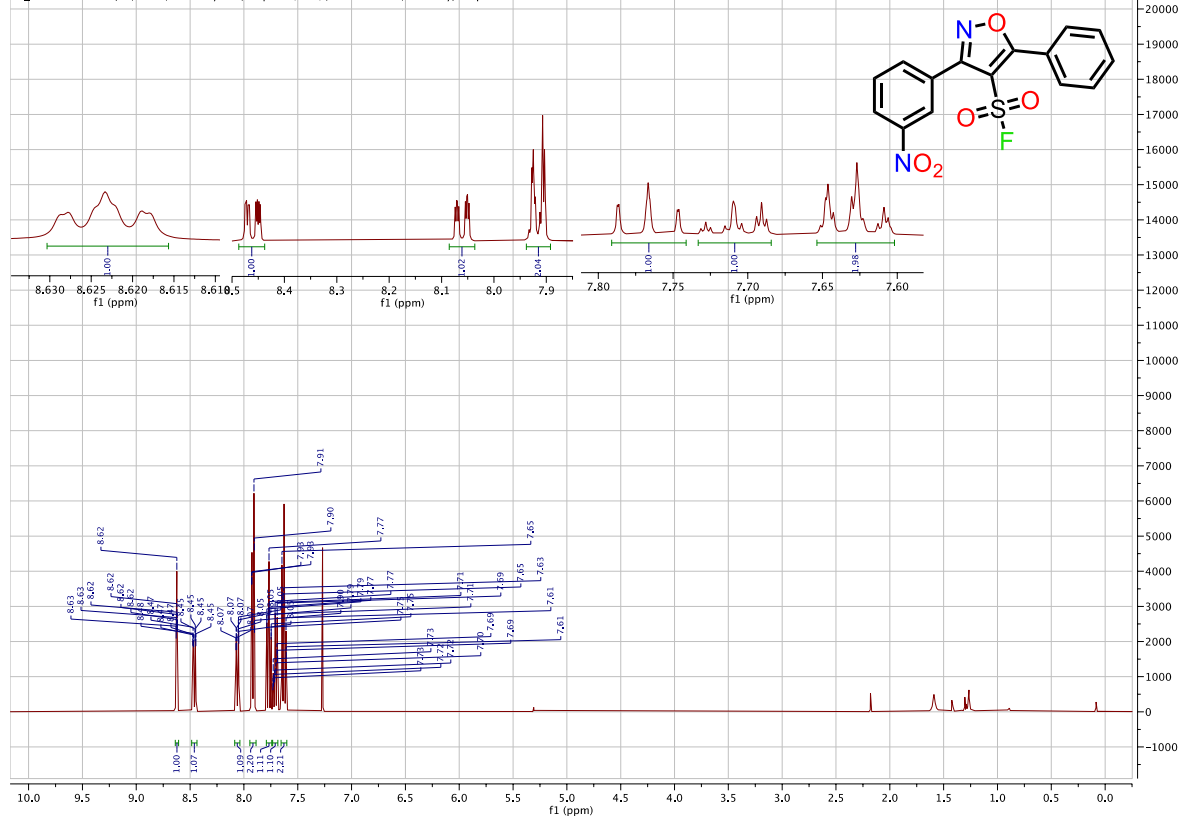

csi-343-data\_3.fid  
13C CDCl3 [C:\Users\chemistry400\Dropbox (LIMS)\LIMS 400MHz\csmedley\ dropbox400 55

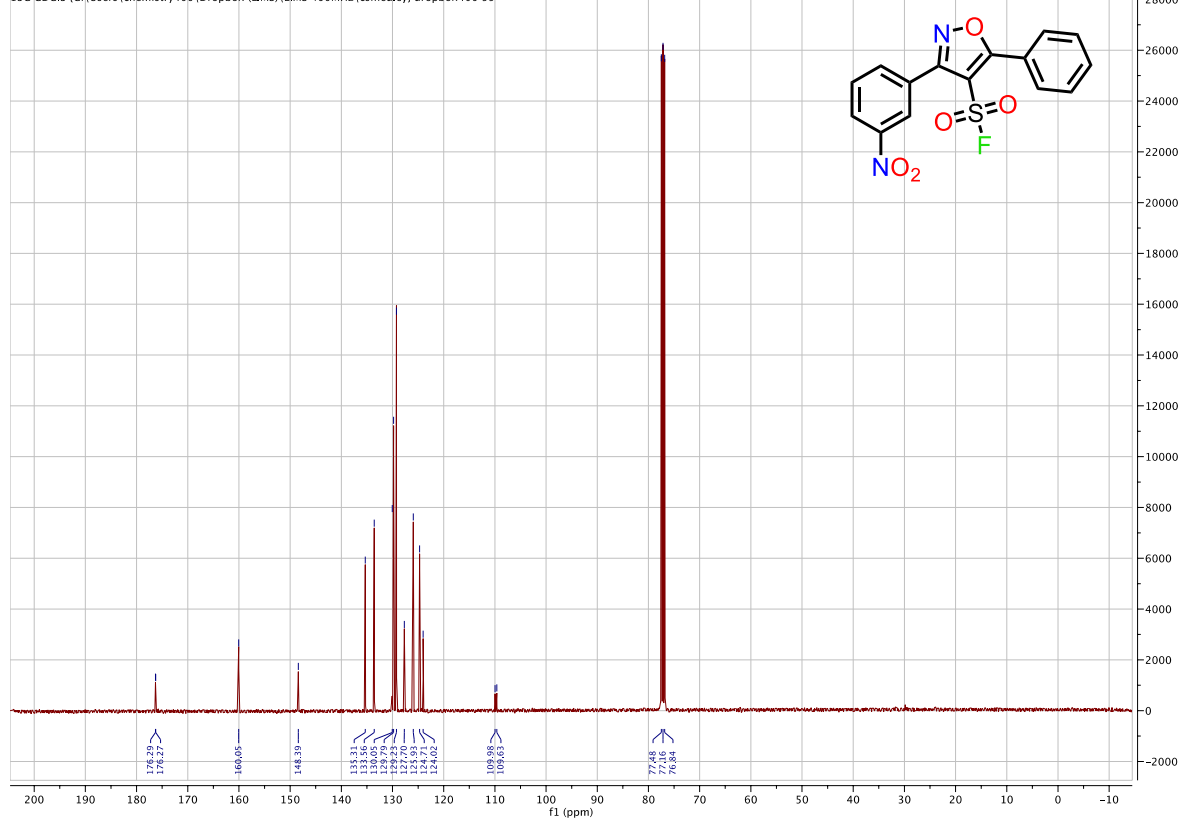

csi-343-data.2.fid  
F-19 standard) CDCl3 (C:\Users\chemistry400\Dropbox (LIMS)\LIMS 400MHz\csmedley) dropbox400 55

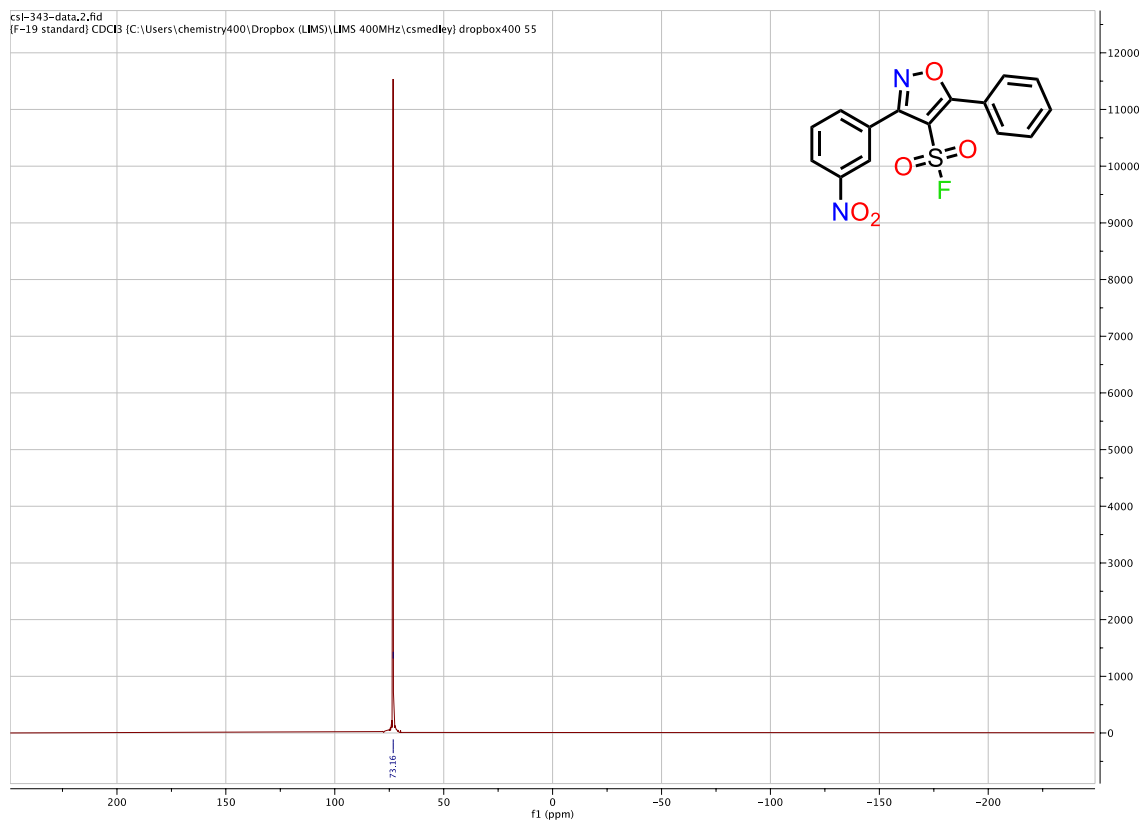

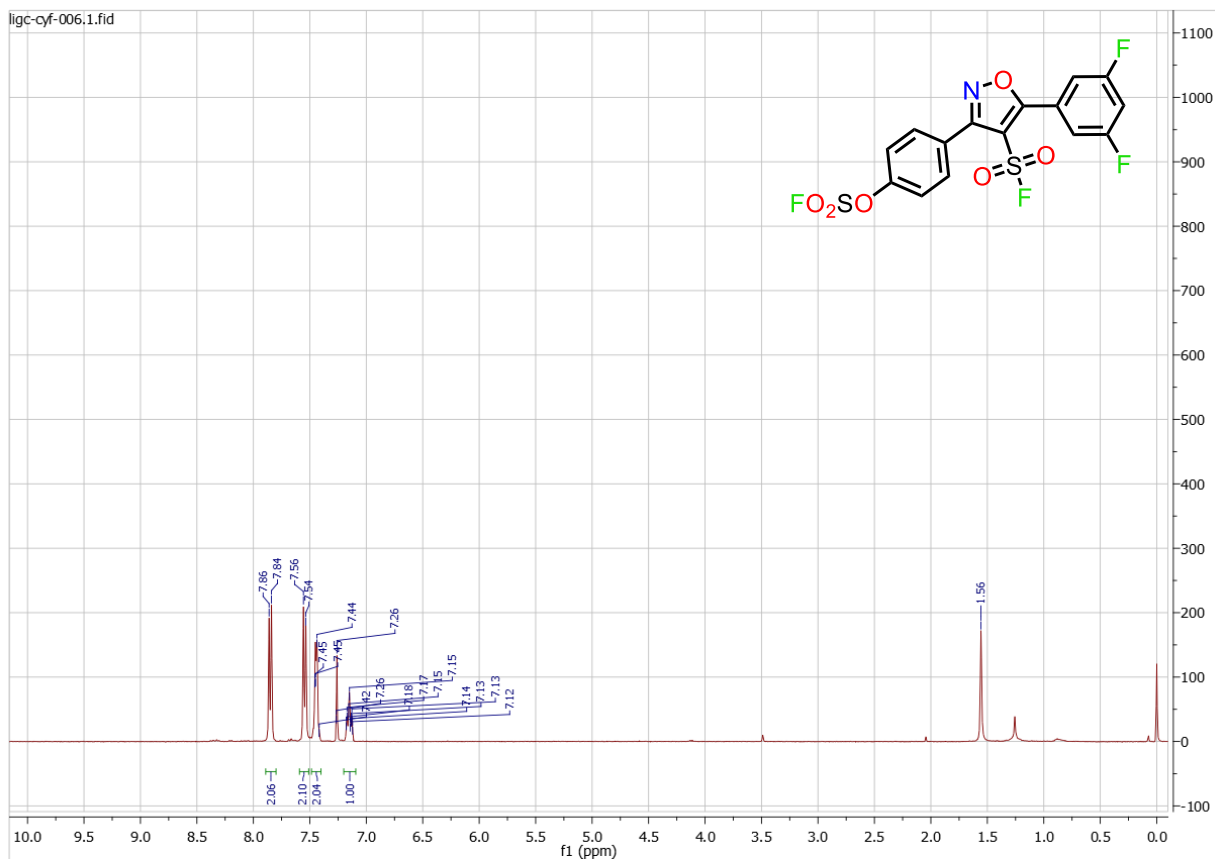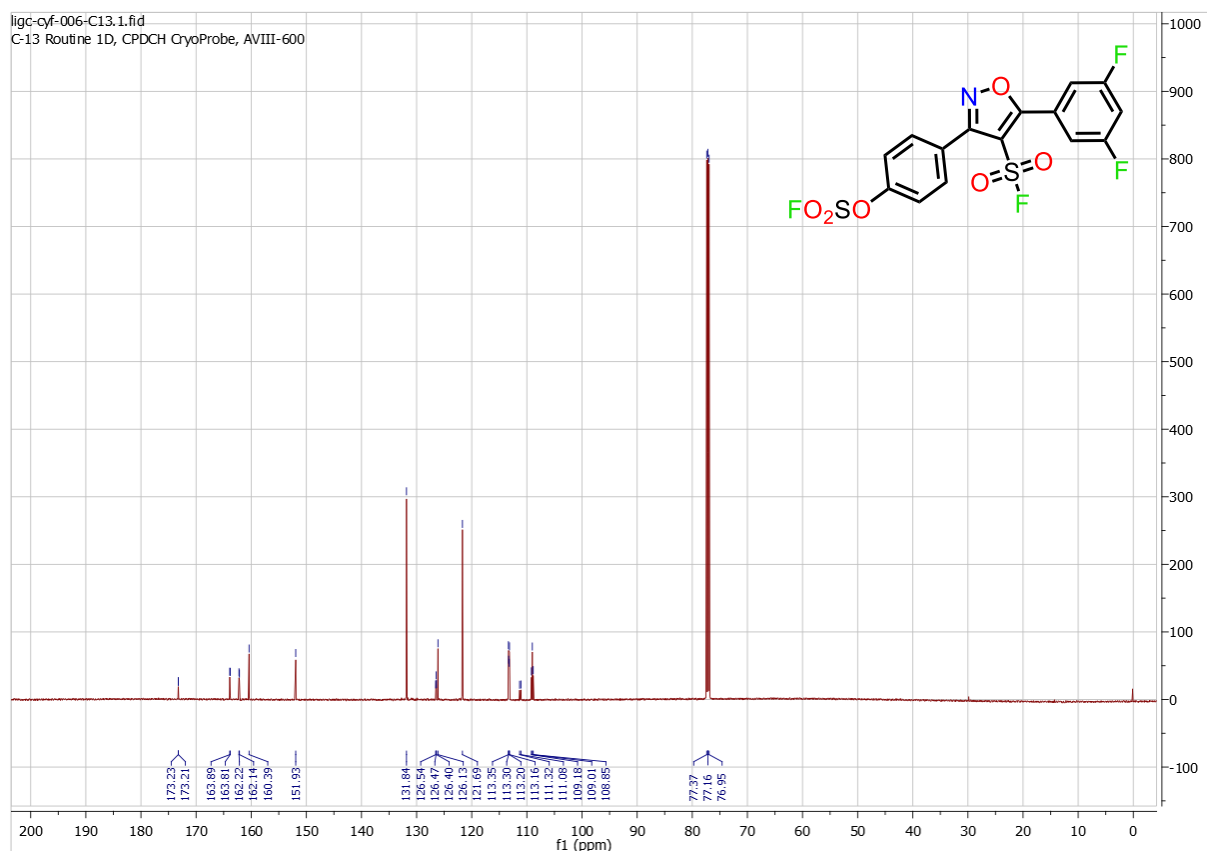

ligc-cyf-006-F.1.fid  
AV400 BBOF Probe, F-19 in CDCl3, CFCl3=0 ppm.

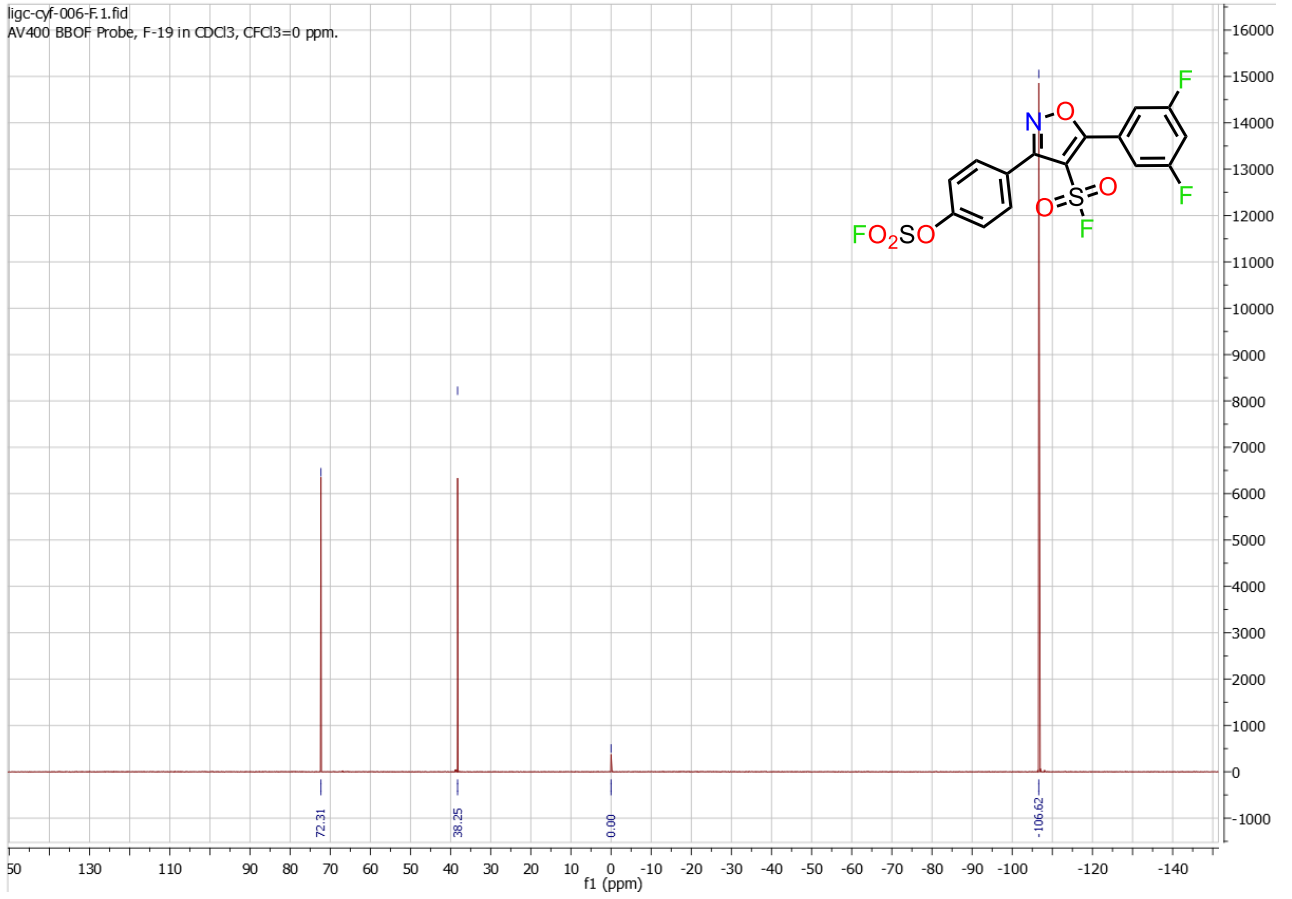

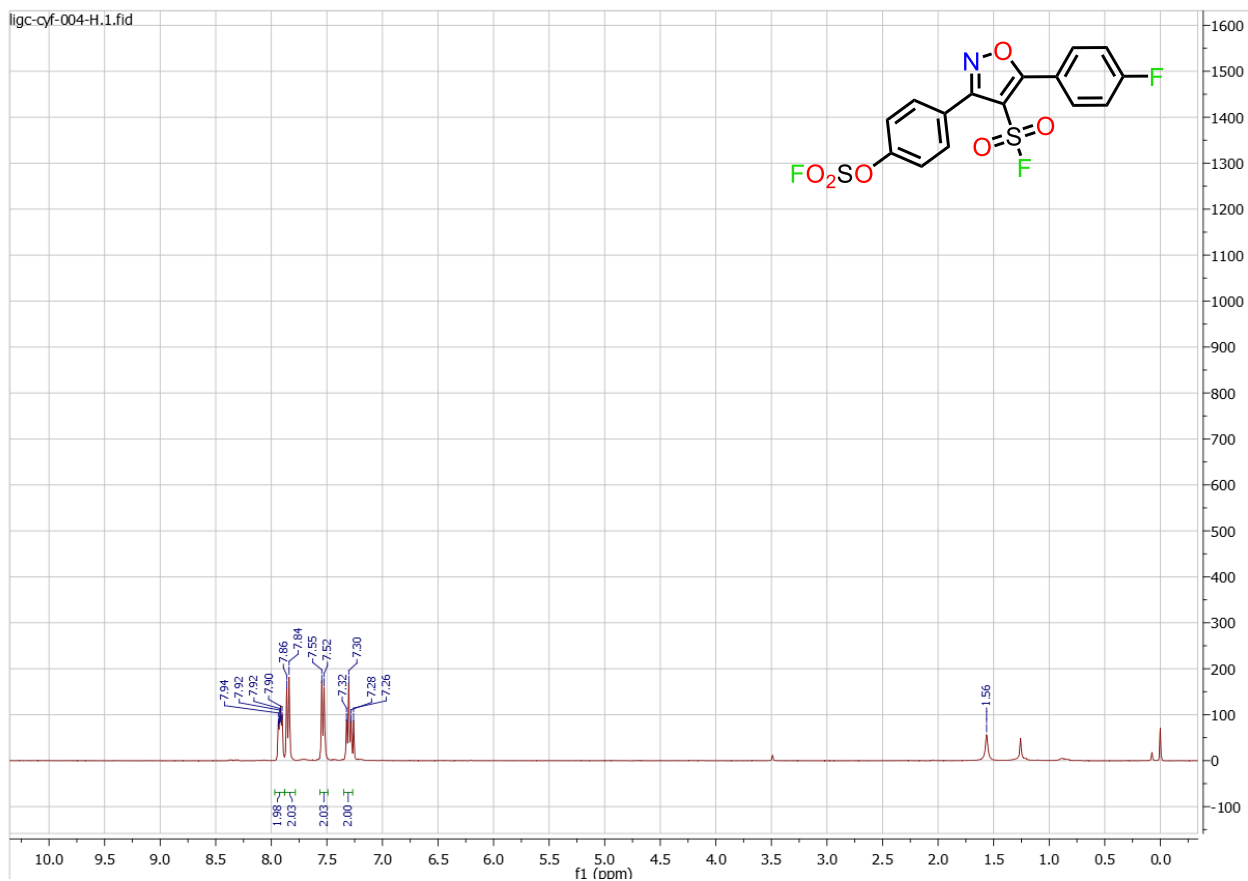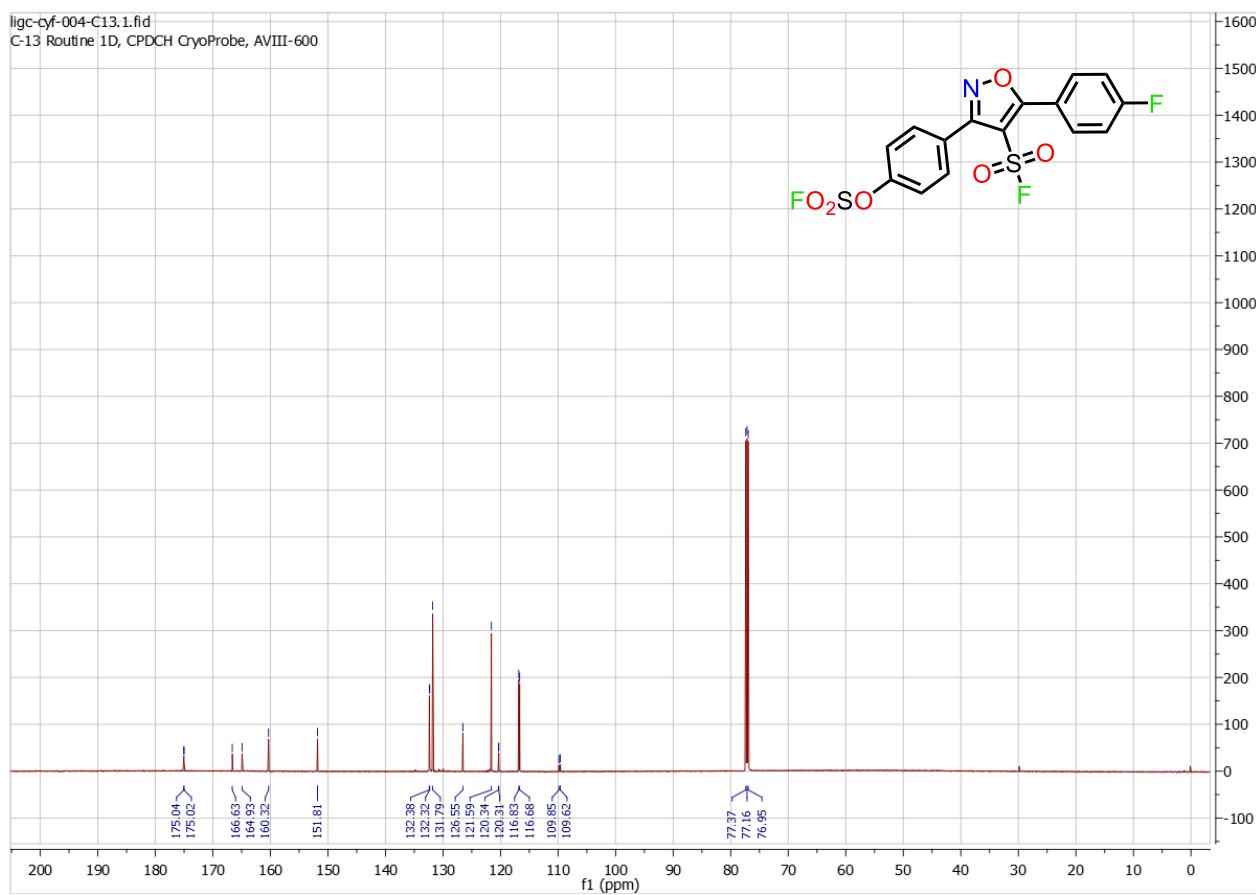



ligc-cyf-004-F.1.fid  
AV400 BBOF Probe, F-19 in CDCl3, CFCl3=0 ppm.

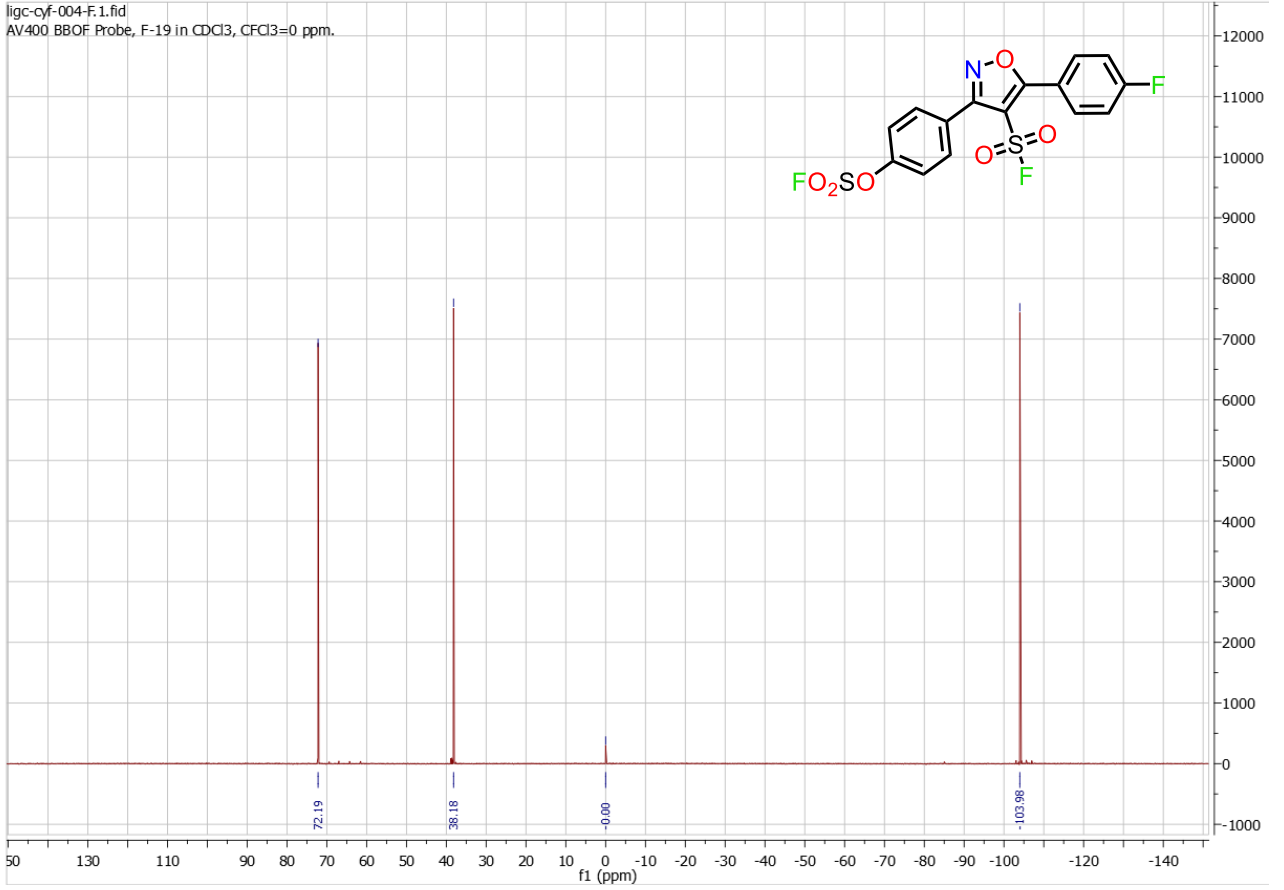

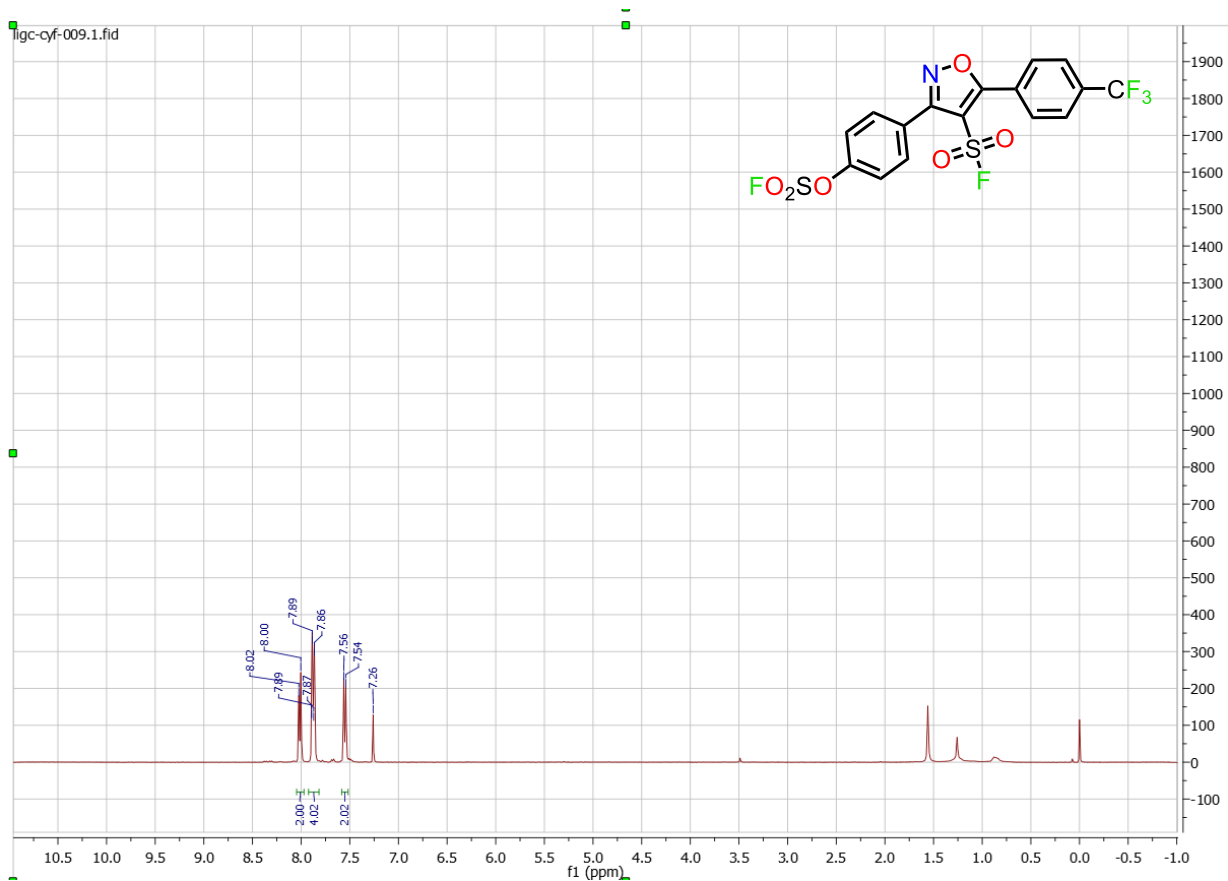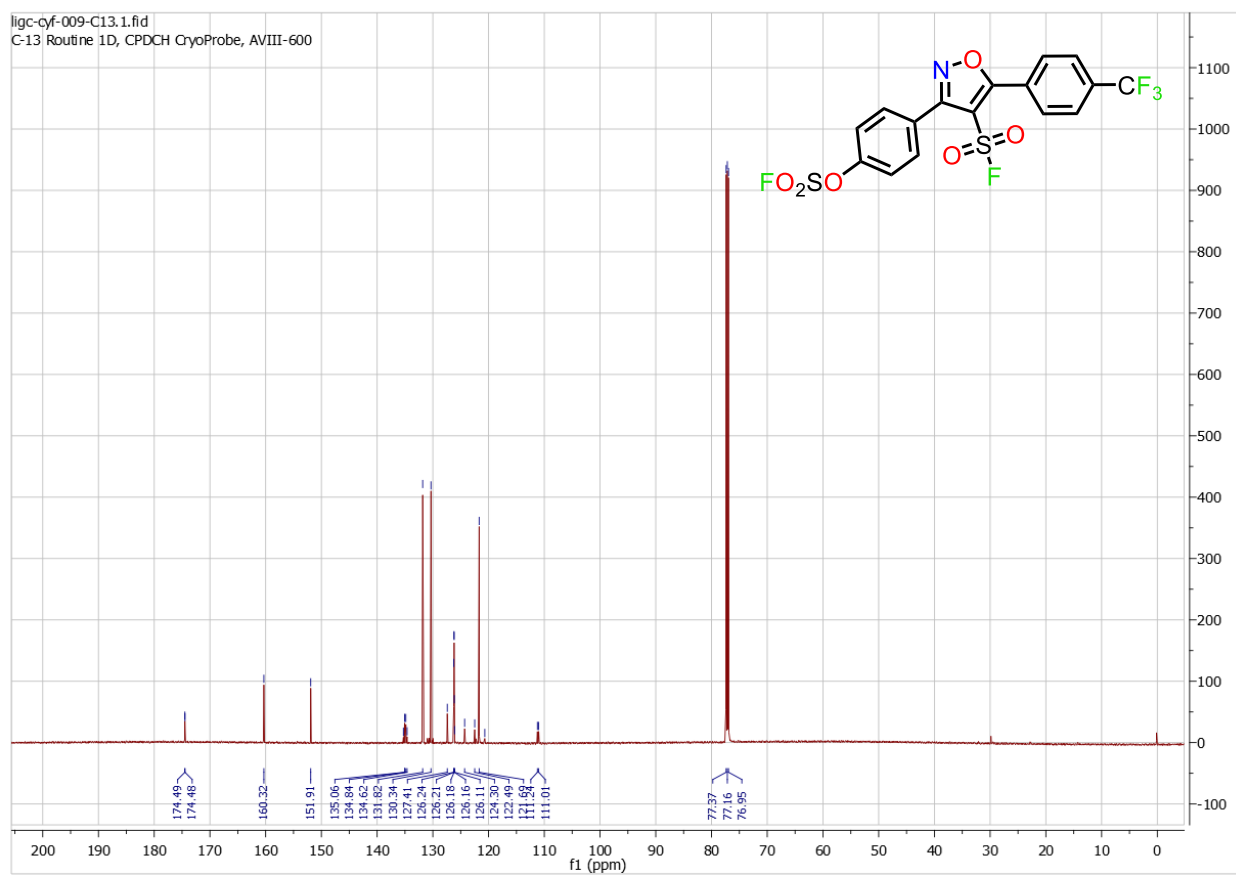

ligc-cyf-009-F.1.fid  
F-19, CDCl<sub>3</sub>, DPX-400 QNP Probe. CF<sub>3</sub>Cl as Ref at 0 ppm.

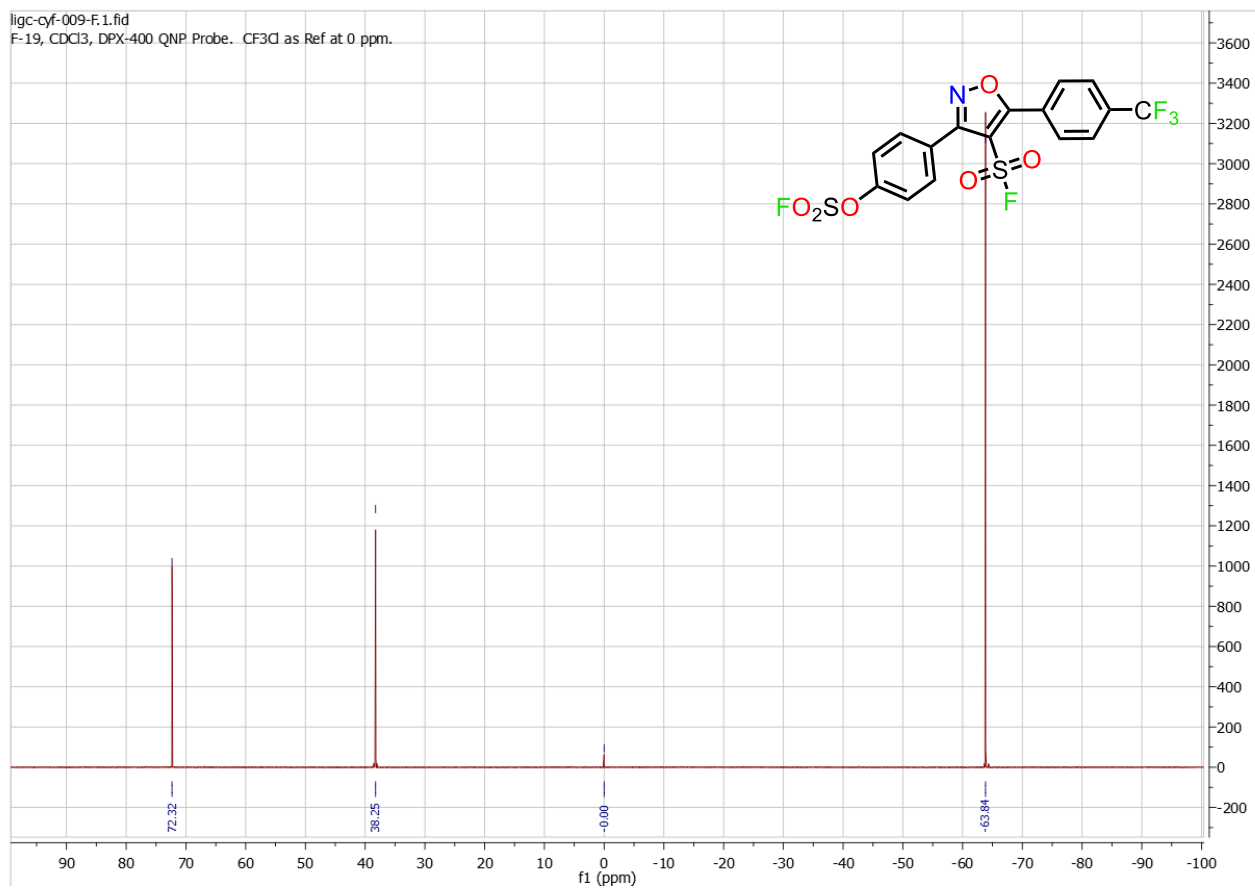

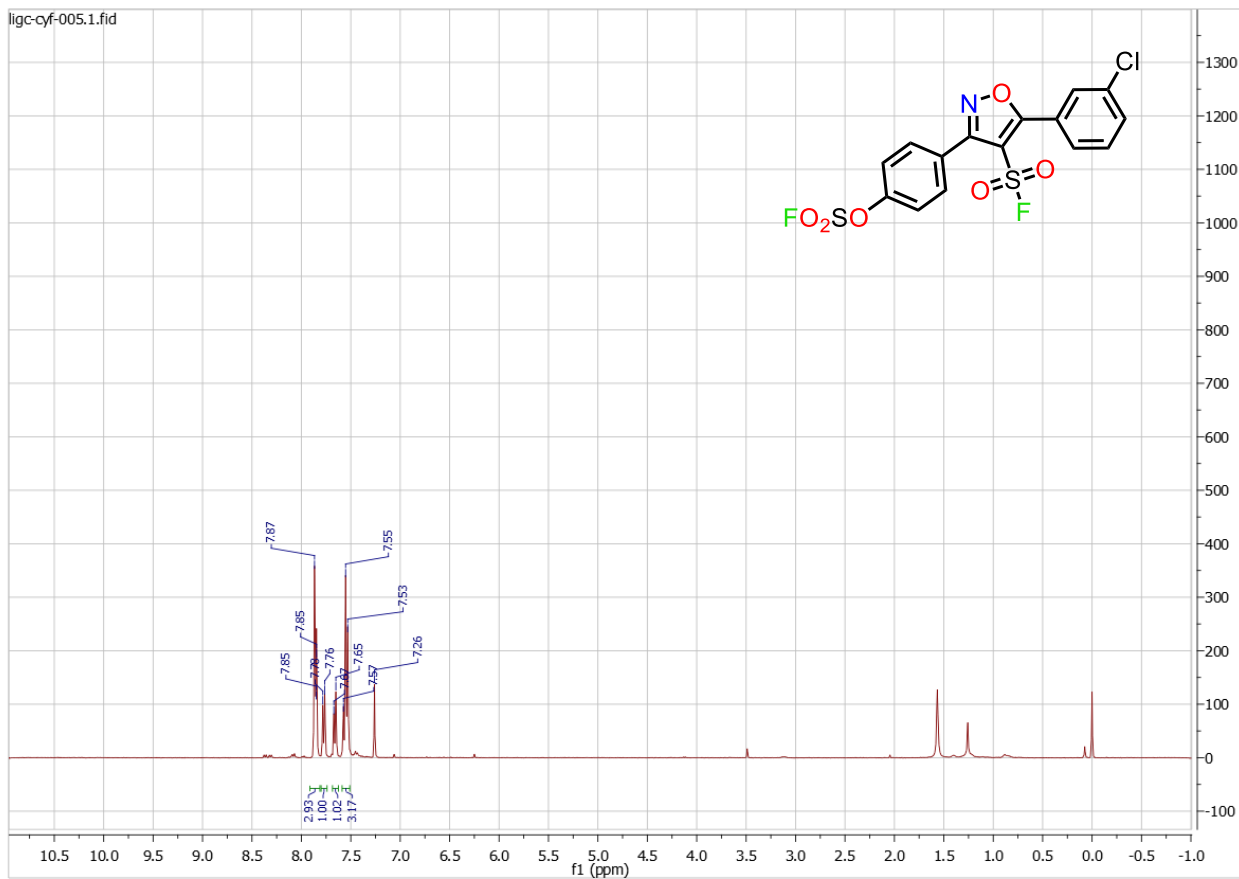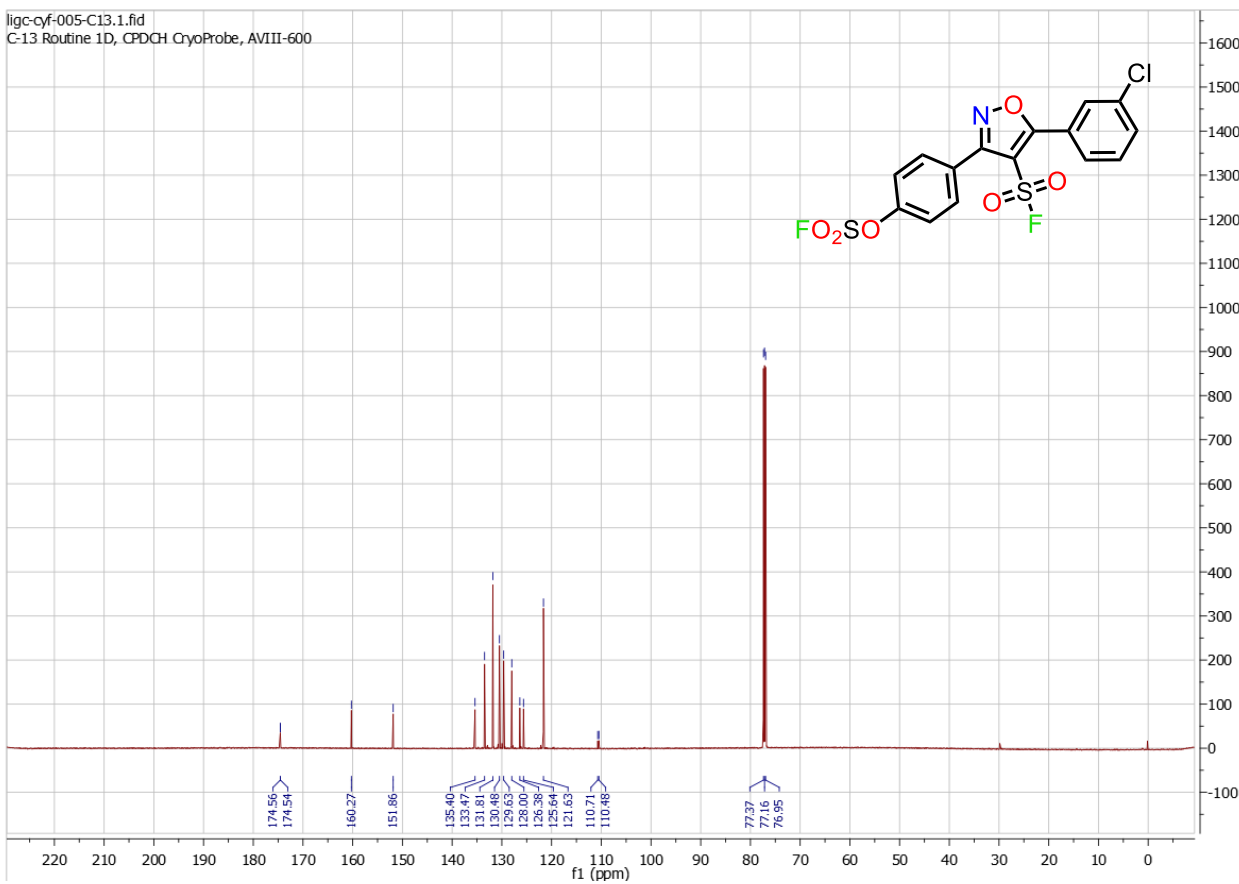

ligc-cyf-005-F1.fid  
F-19, CDCl3, DPX-400 QNP Probe. CF3Cl as Ref at 0 ppm.

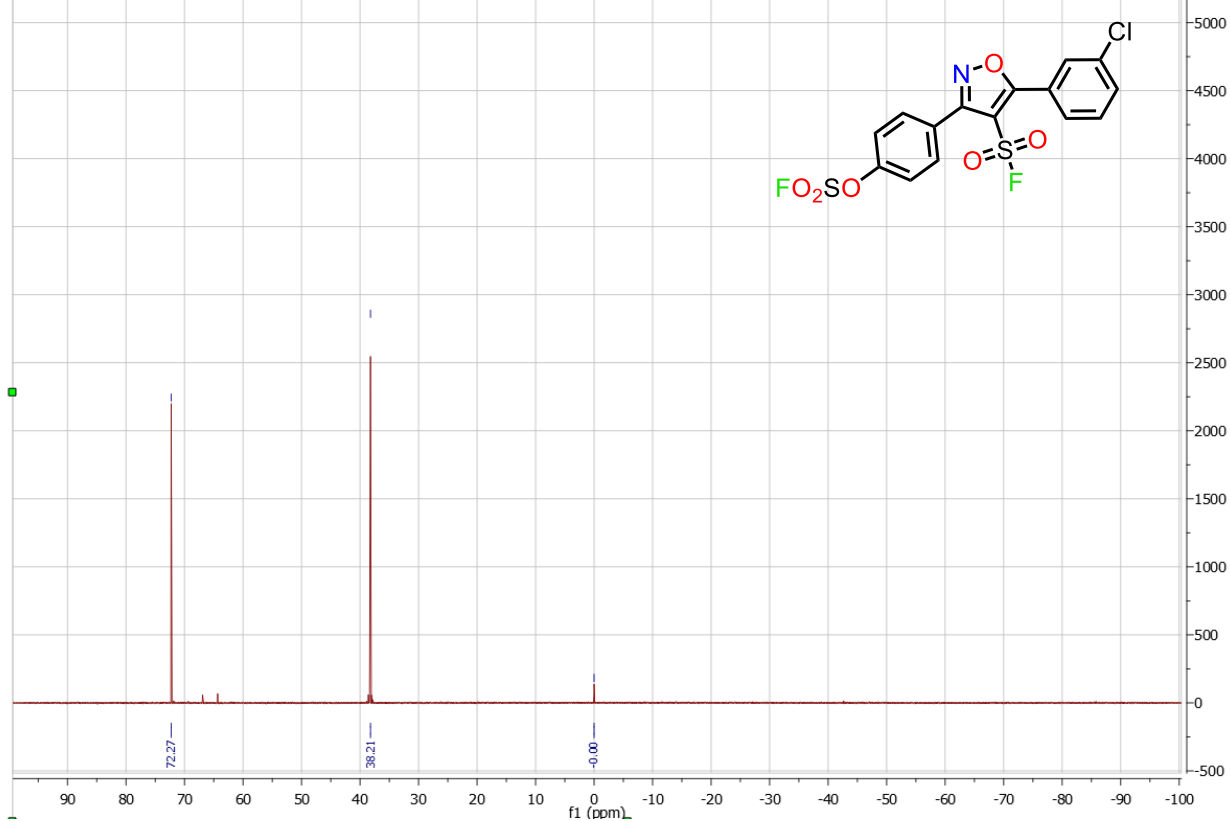

ligc-cyf-007(p-Cl-OSO2F impure), 1.fid

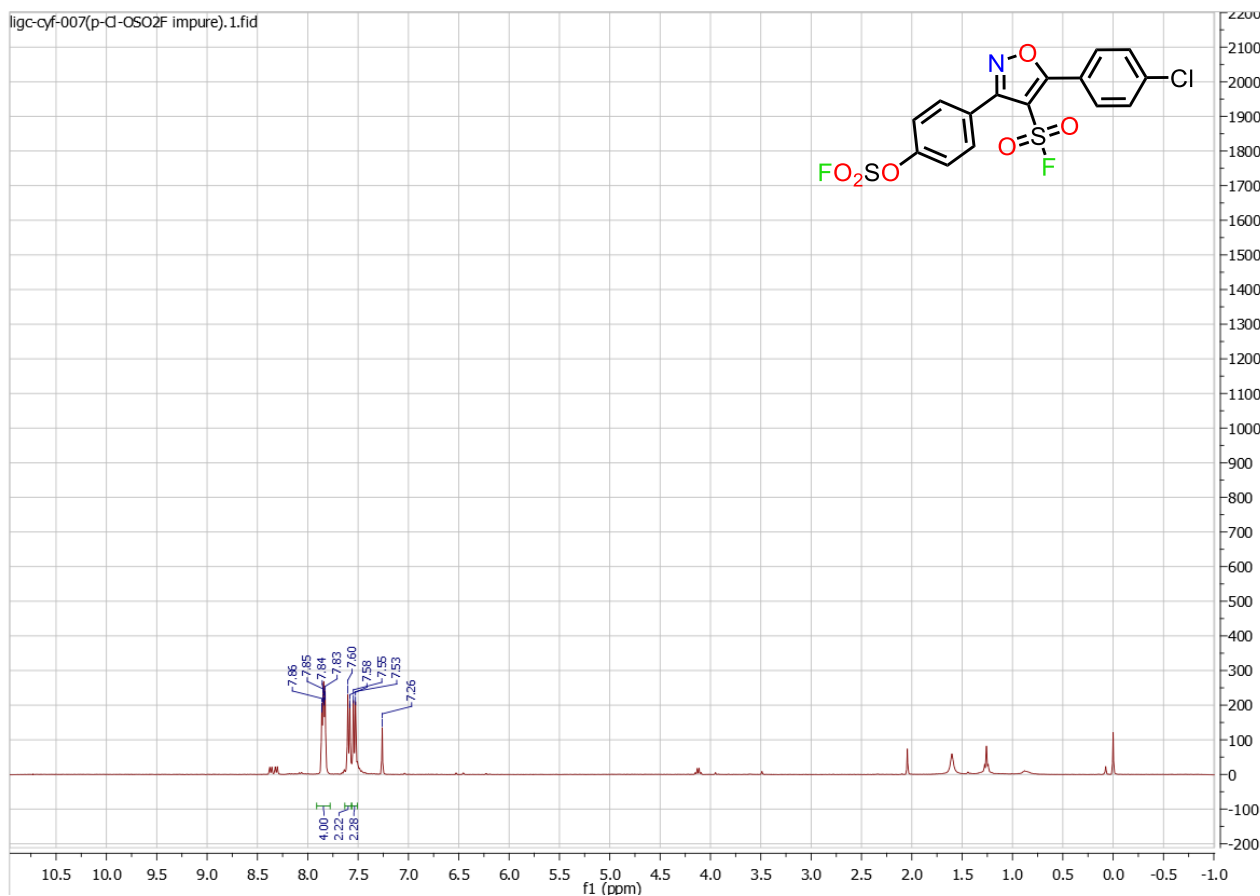

ligc-cyf-007-C13.1.fid

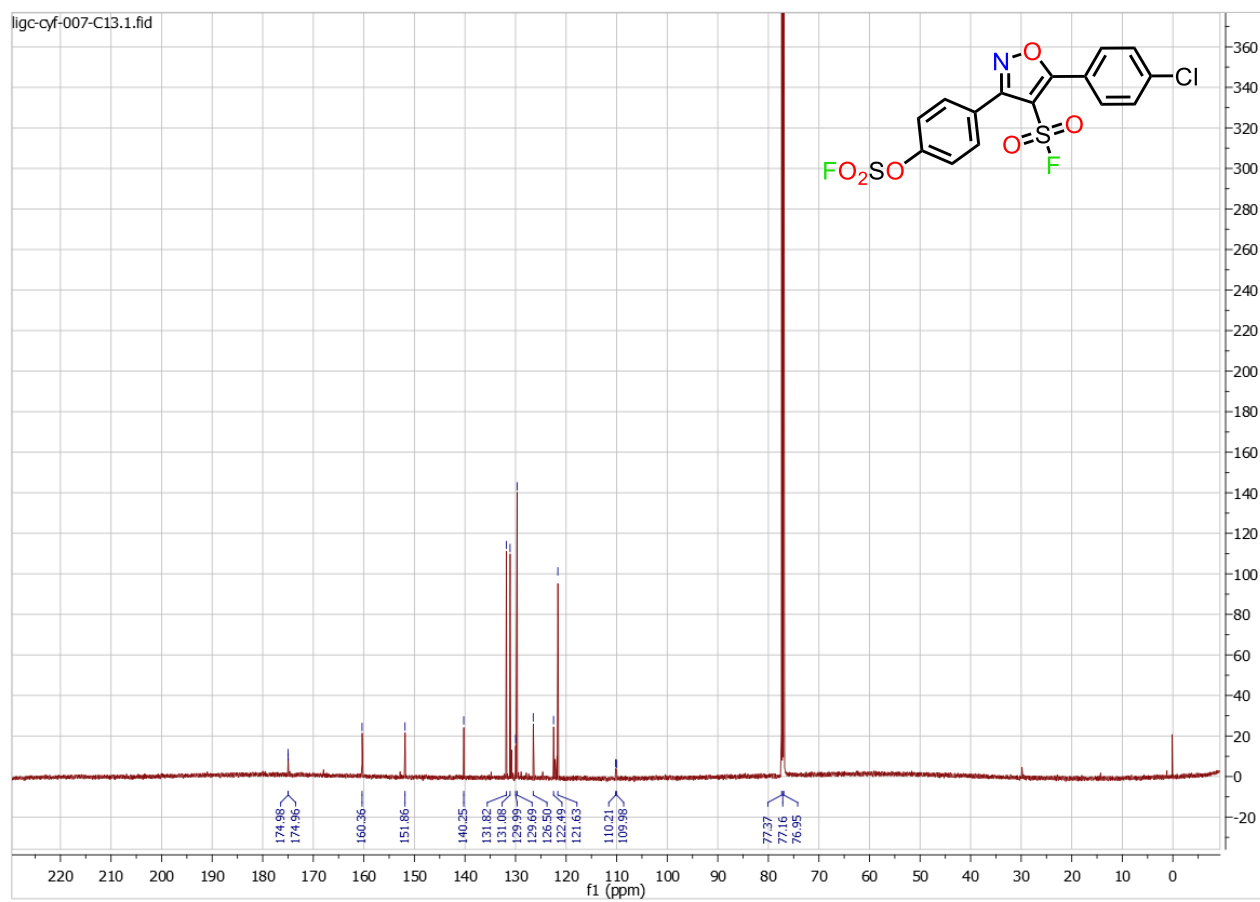

ligc-cyf-007-F.1.fid  
F-19, CDCl3, DPX-400 QNP Probe. CF3Cl as Ref at 0 ppm.

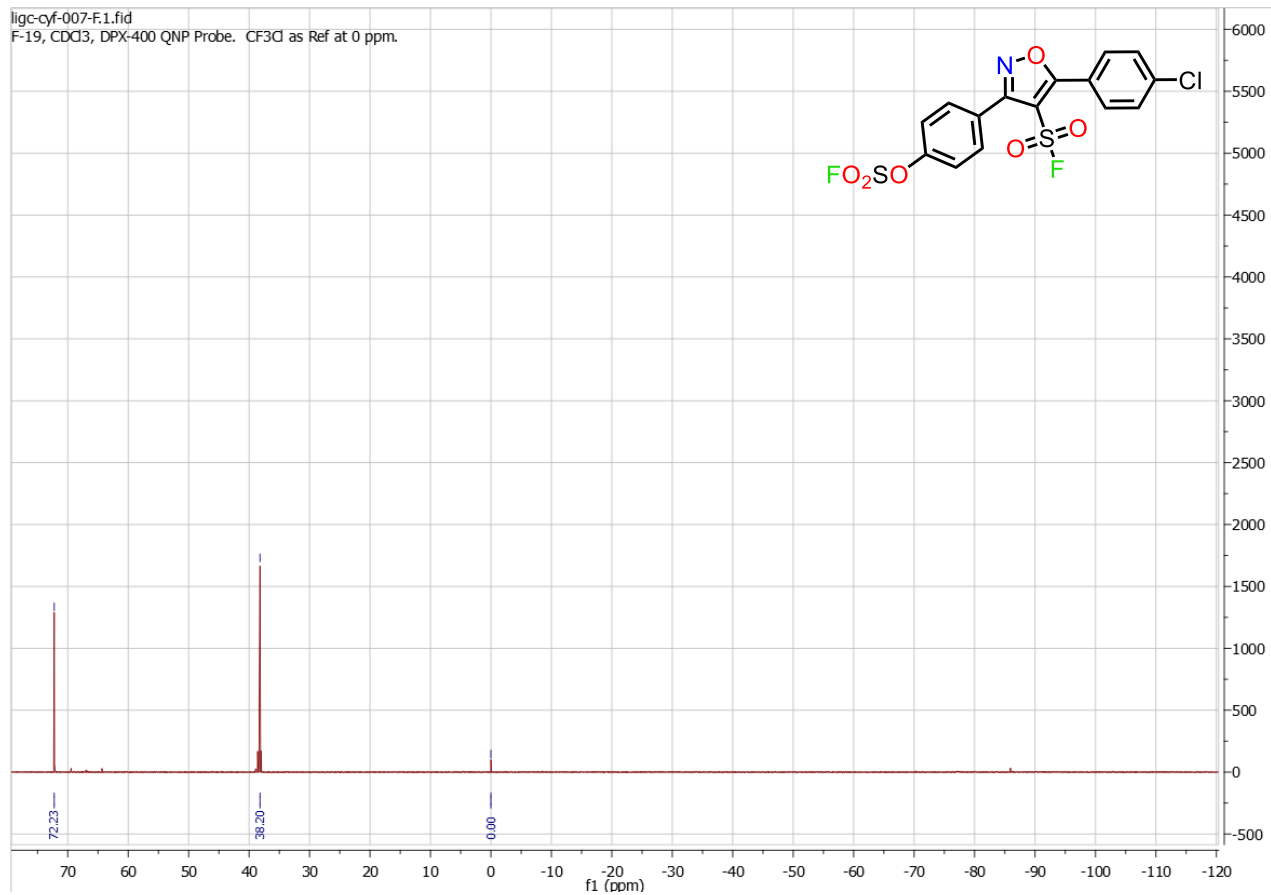

mcg1255dat

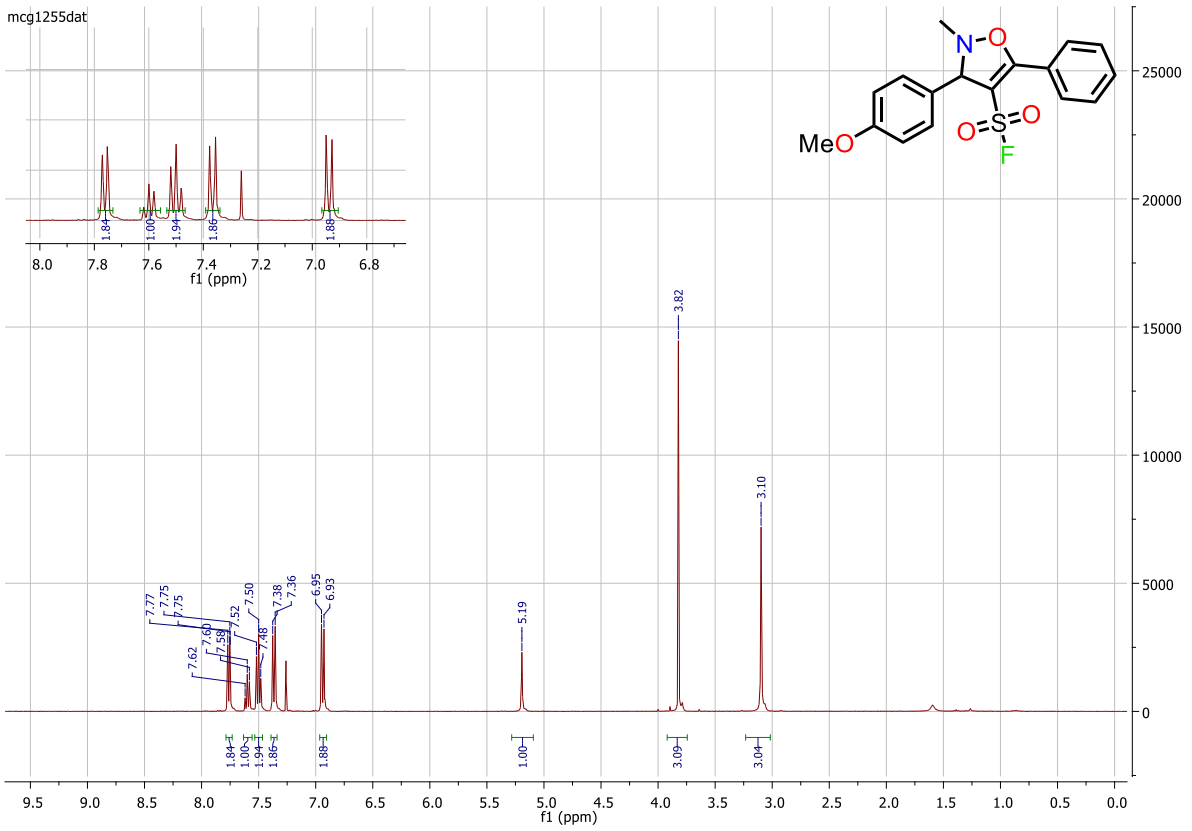

mcg1255dat

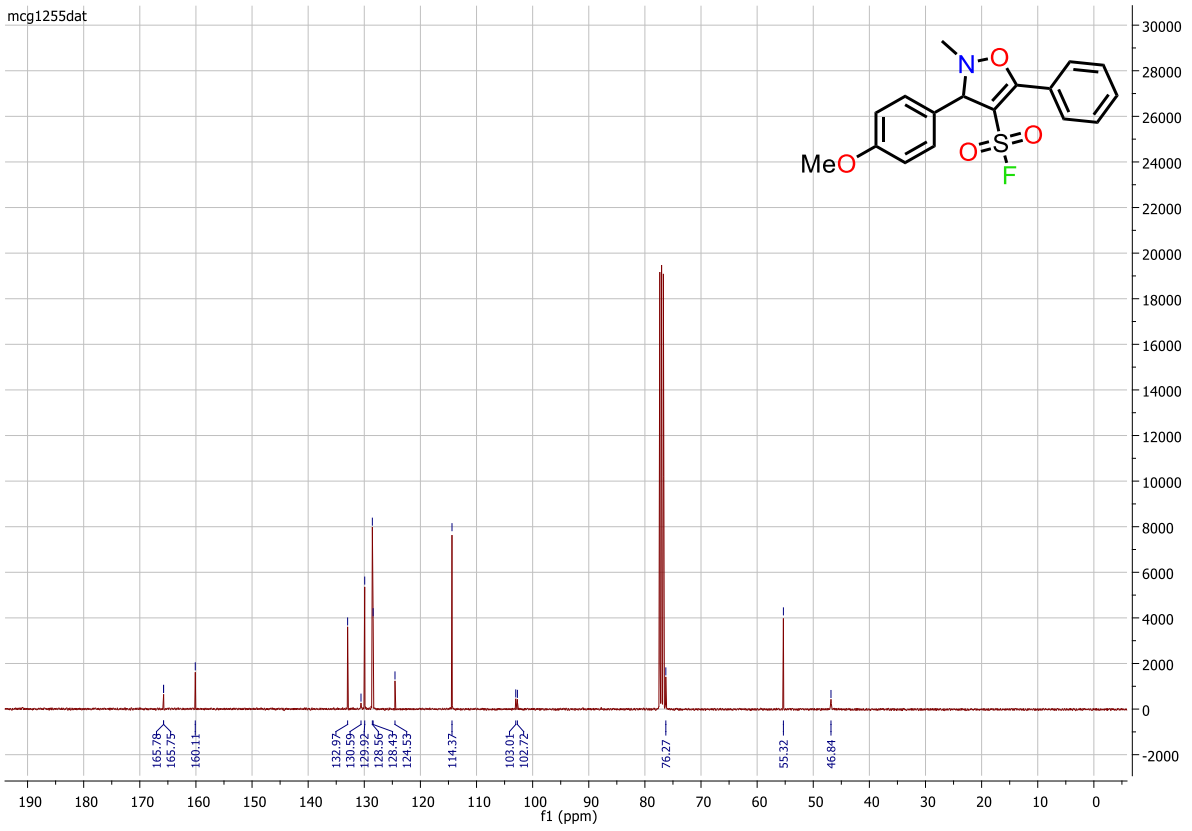



mcg1255dat

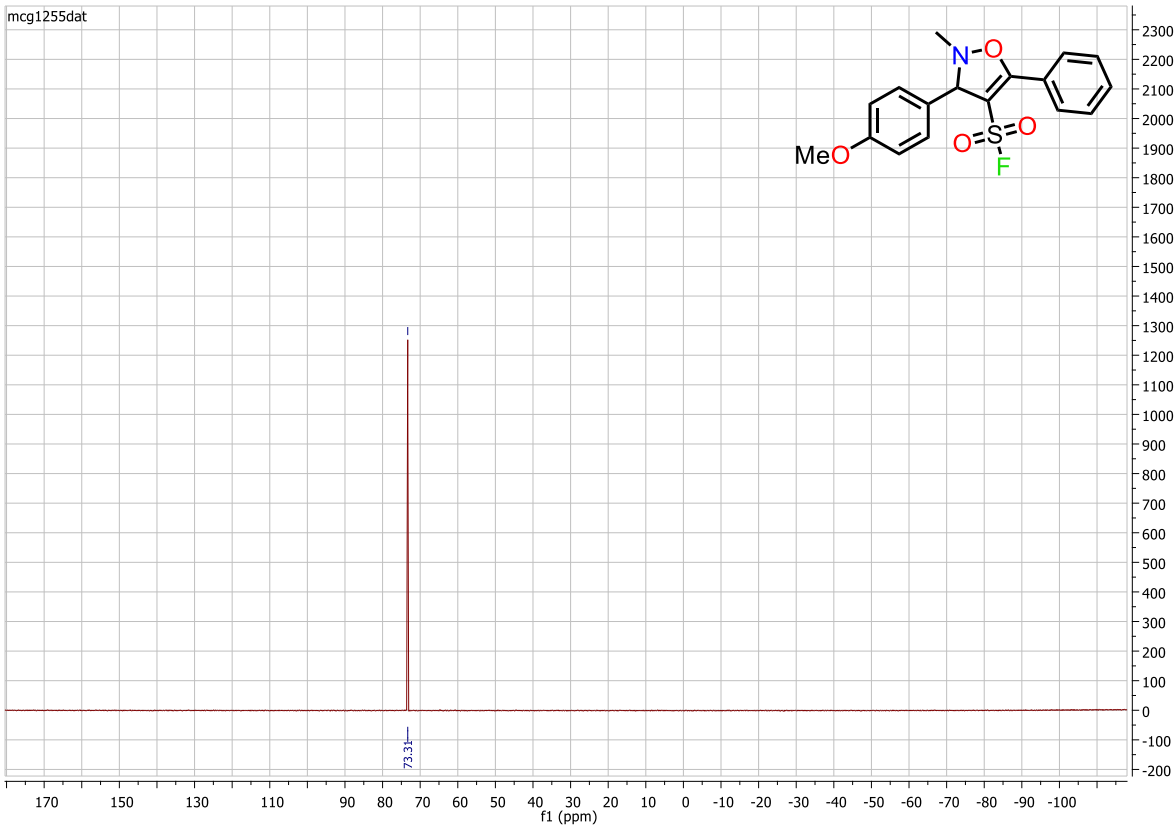



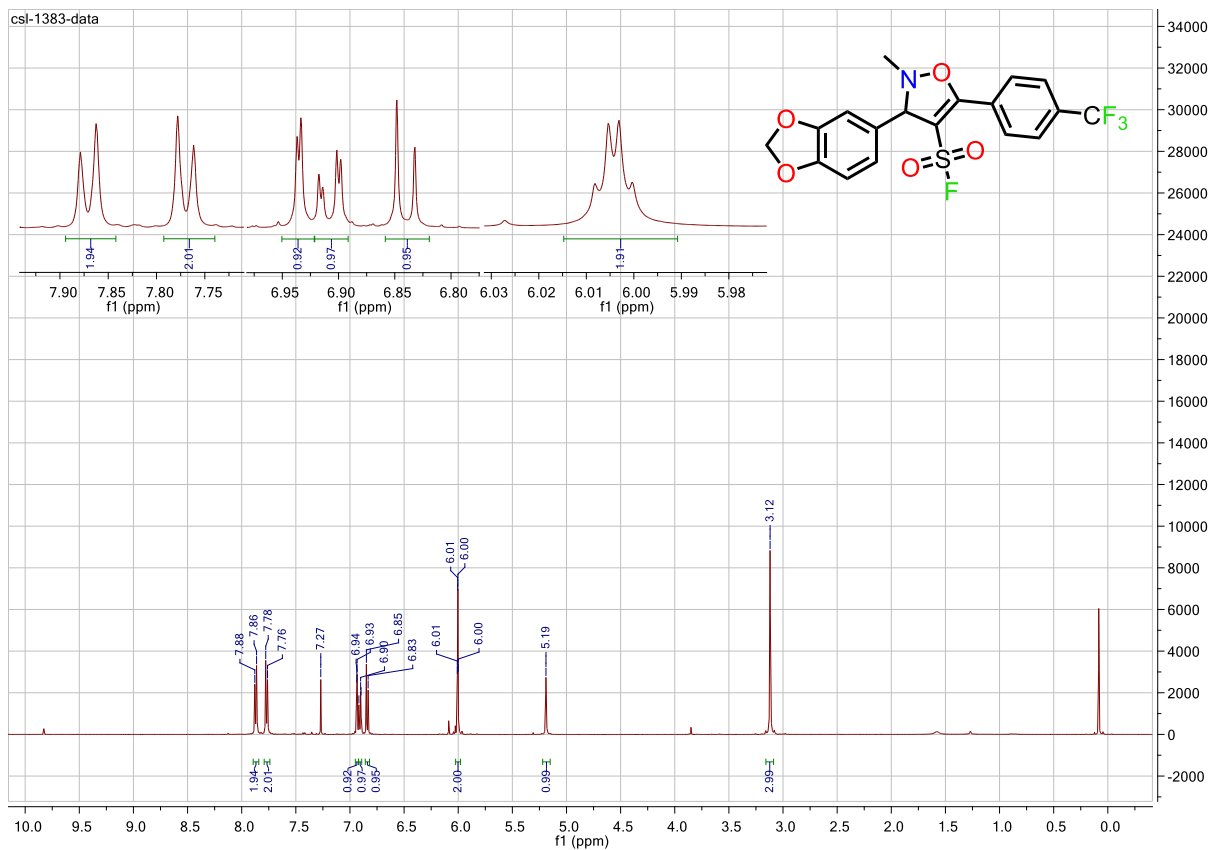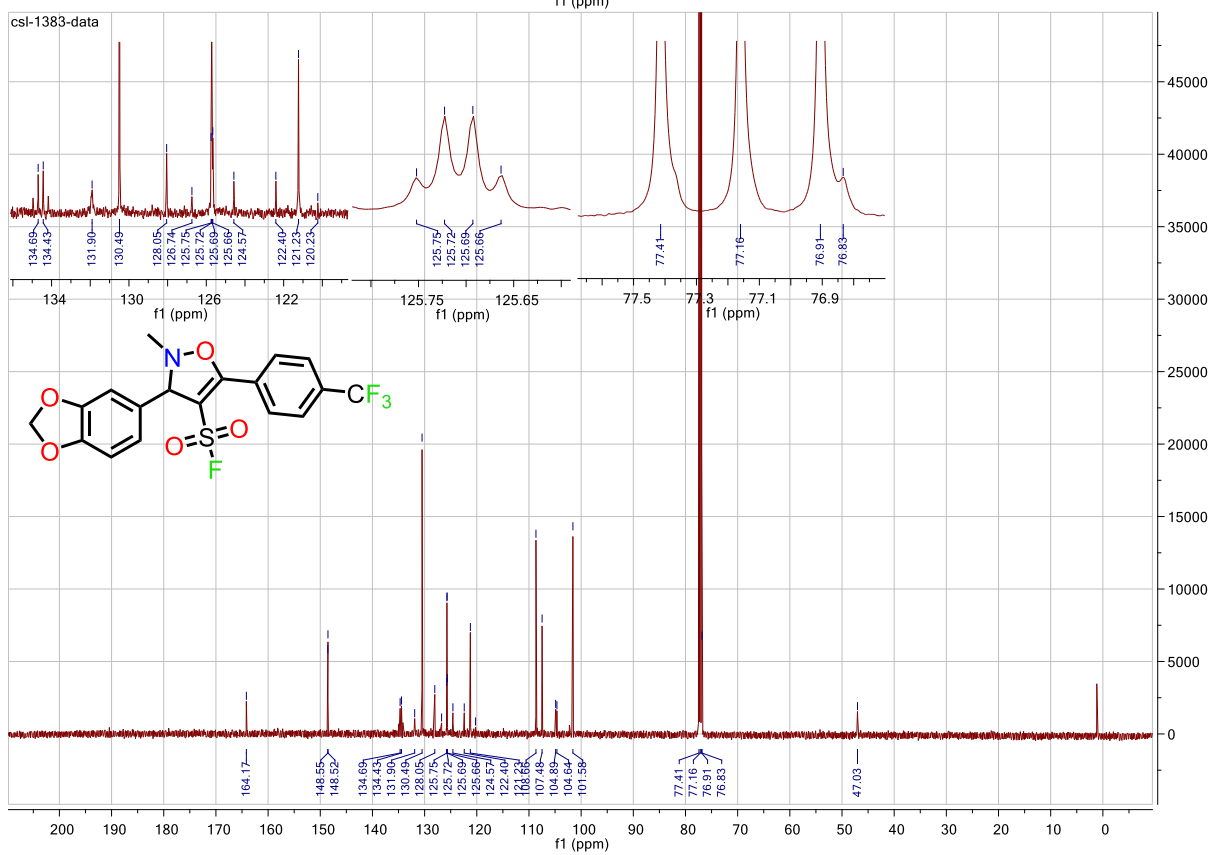

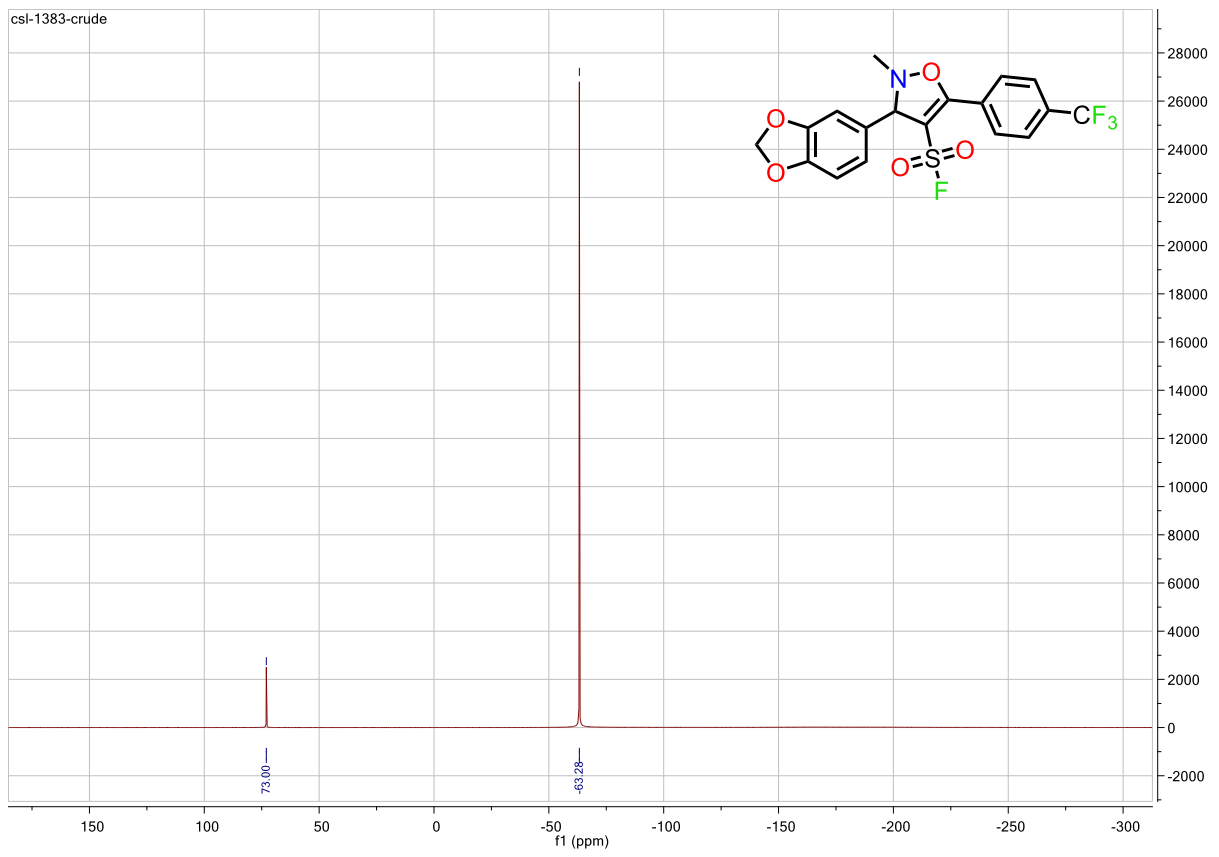

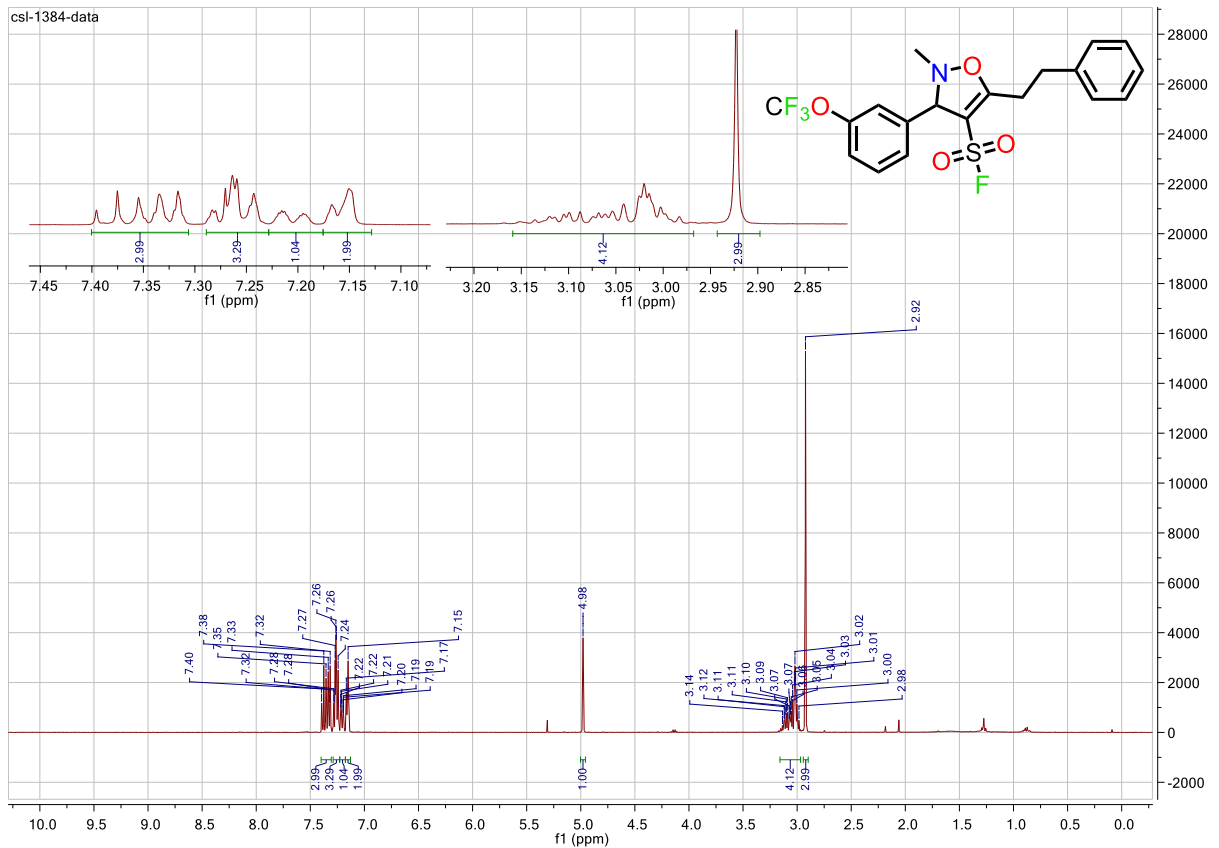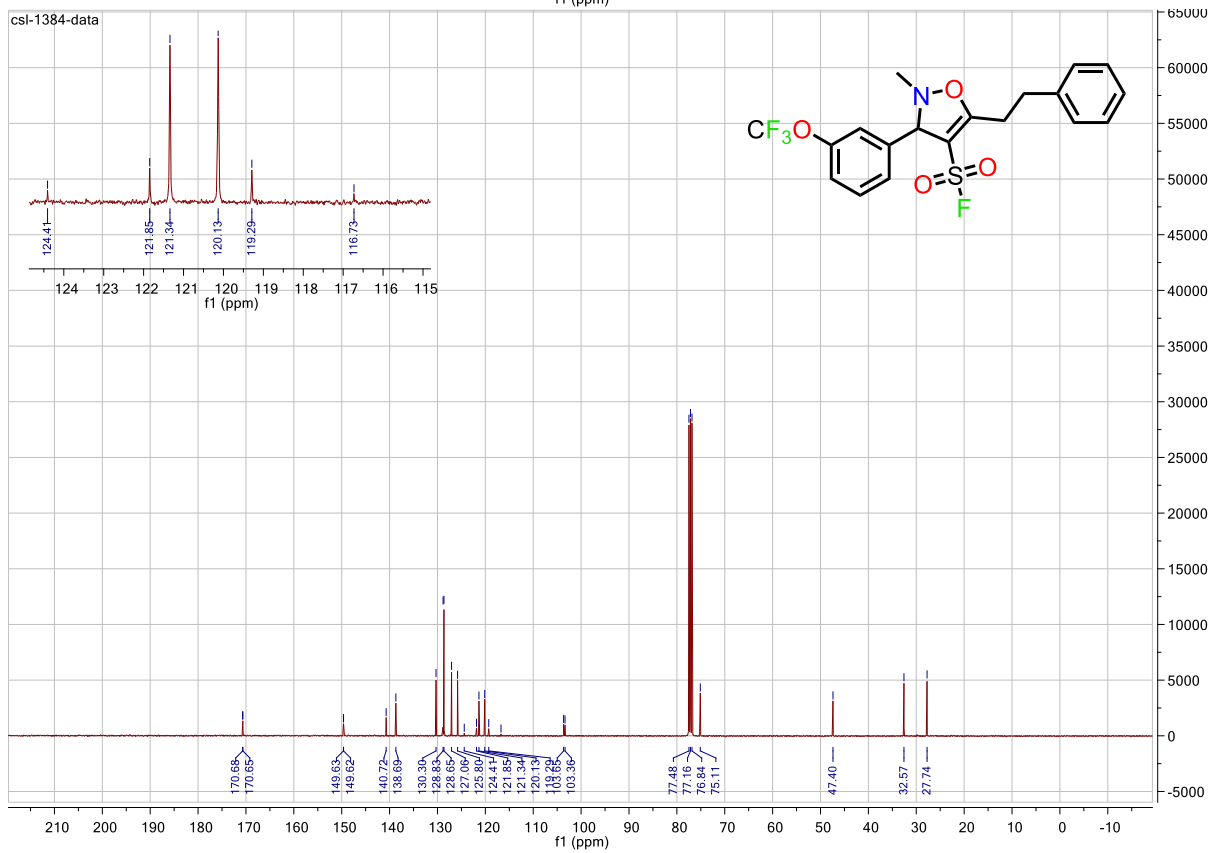

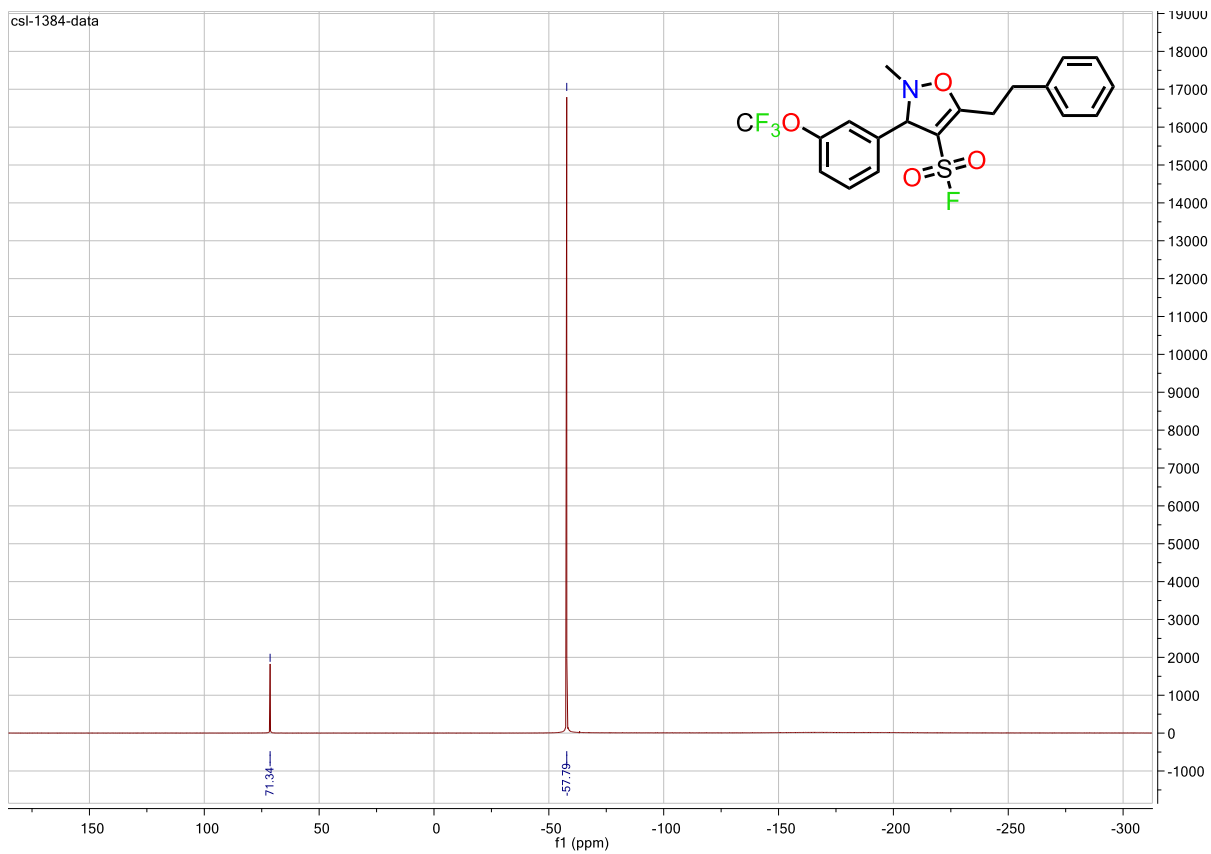

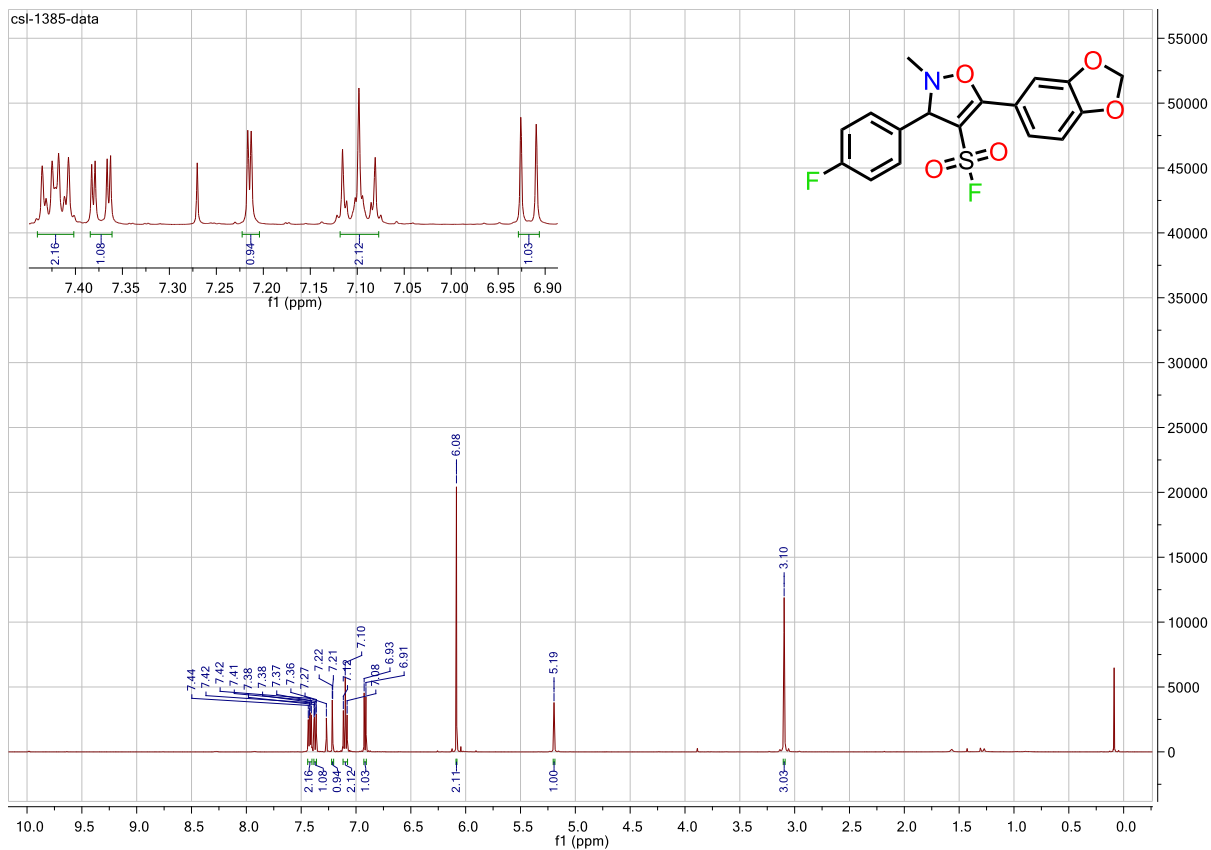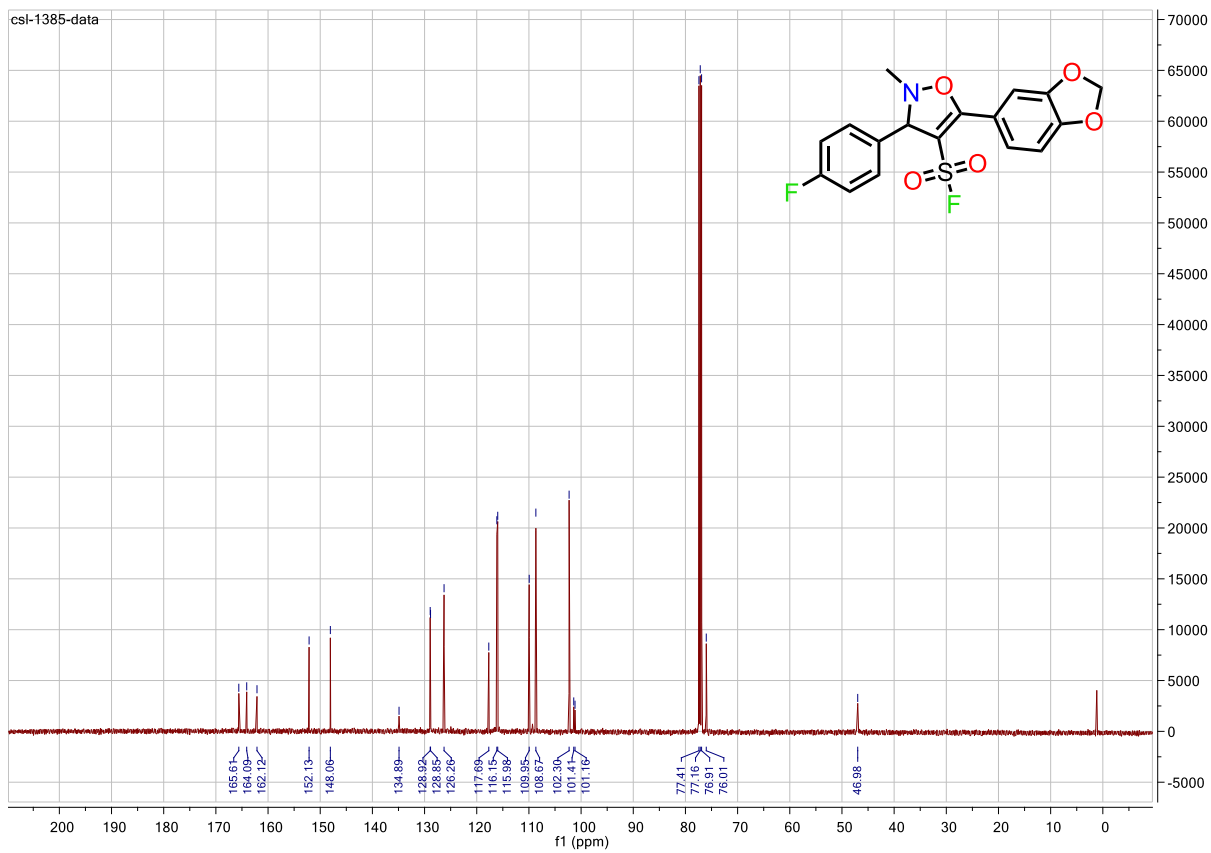

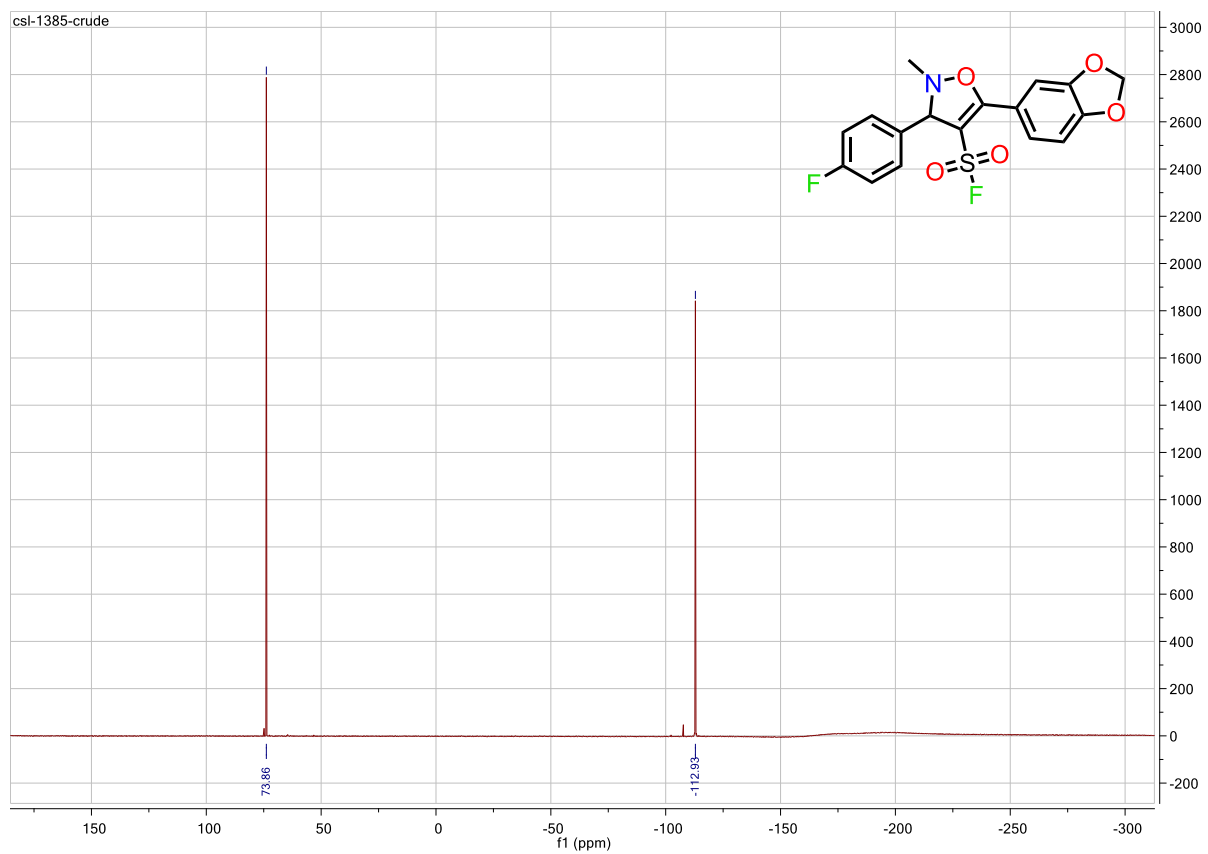



mcg1280dat

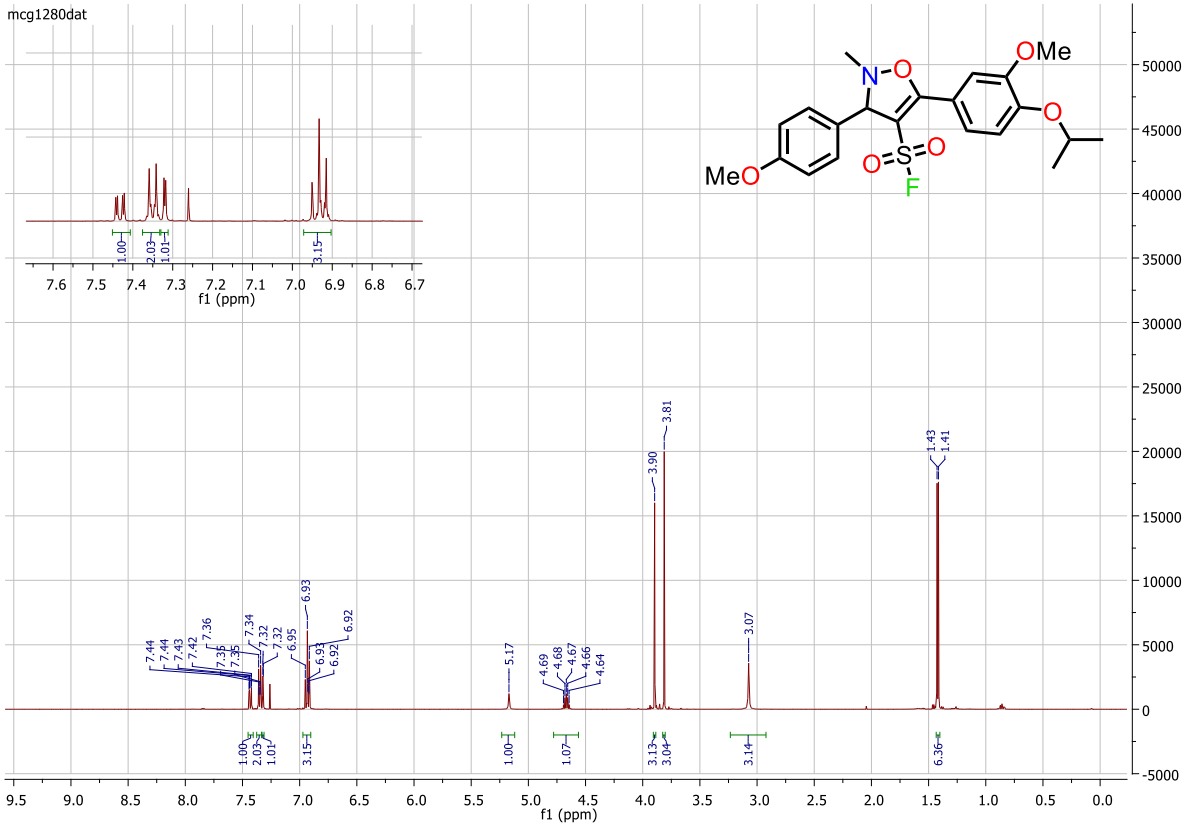

mcg1280dat

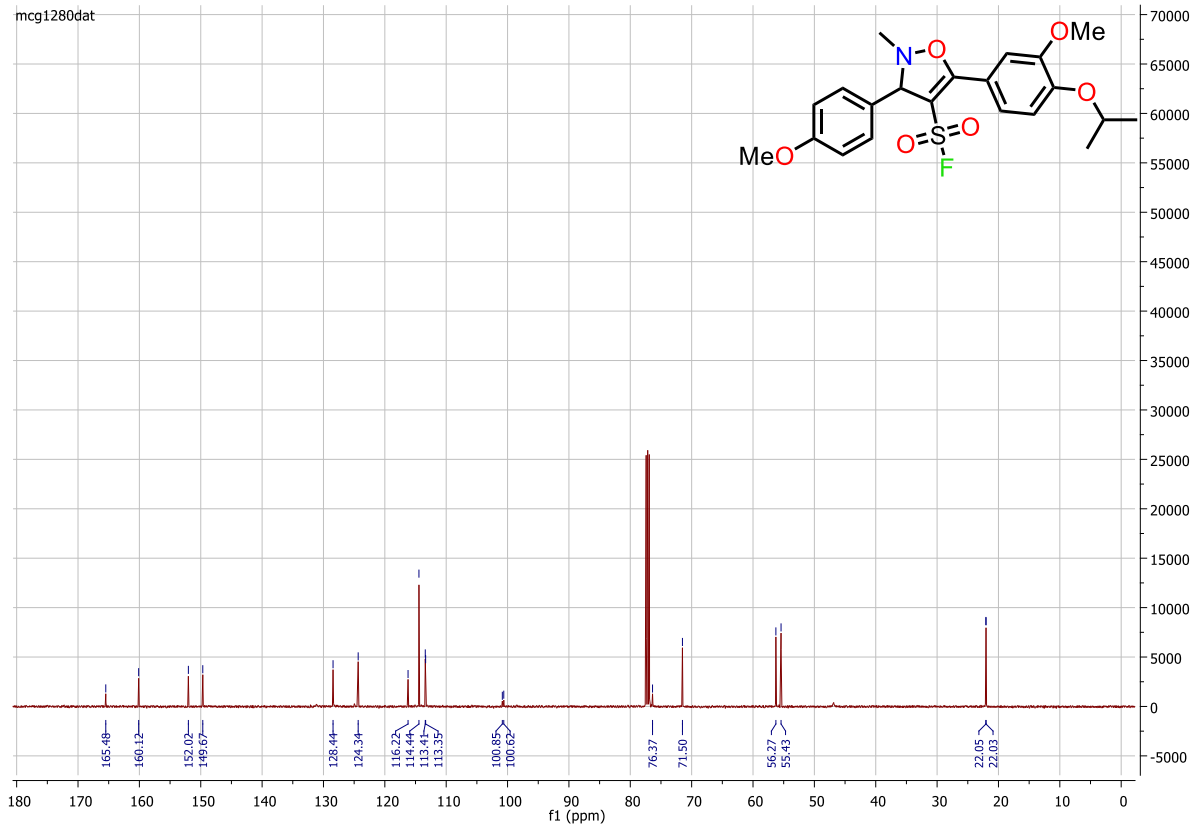

mcg1256a

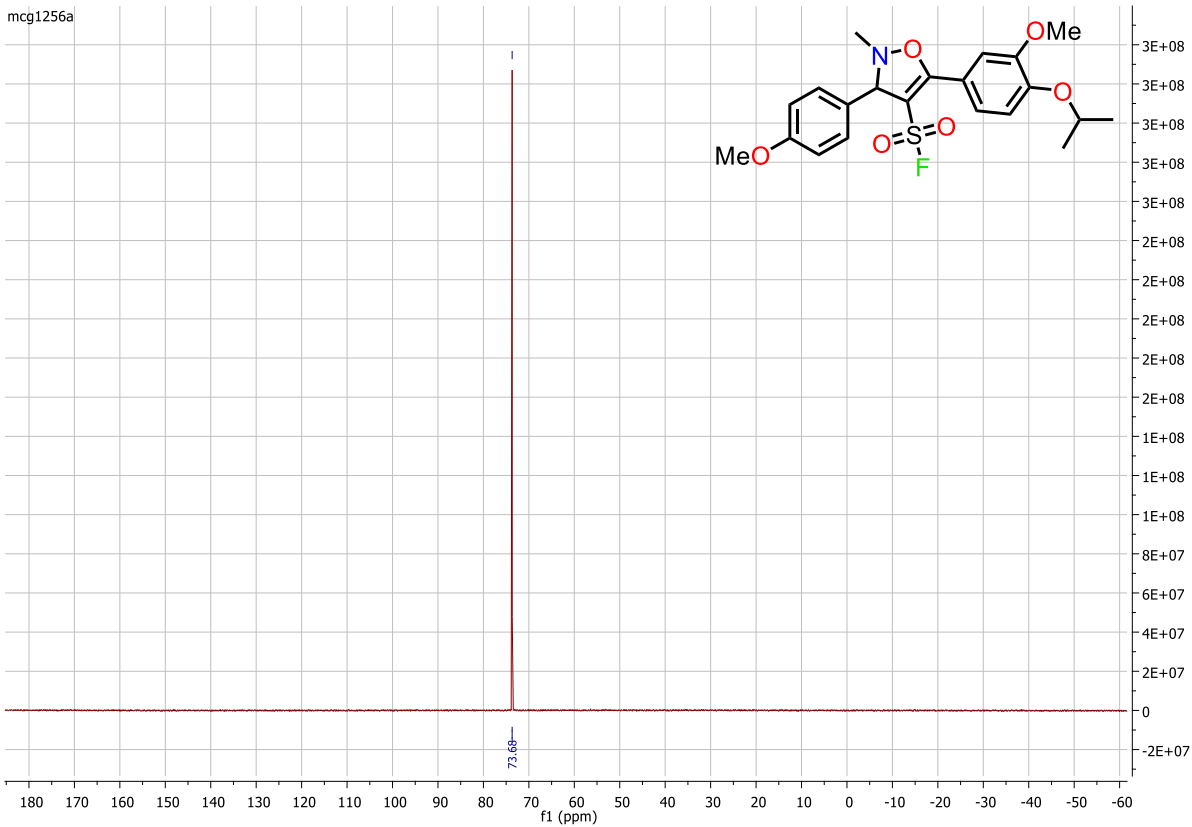



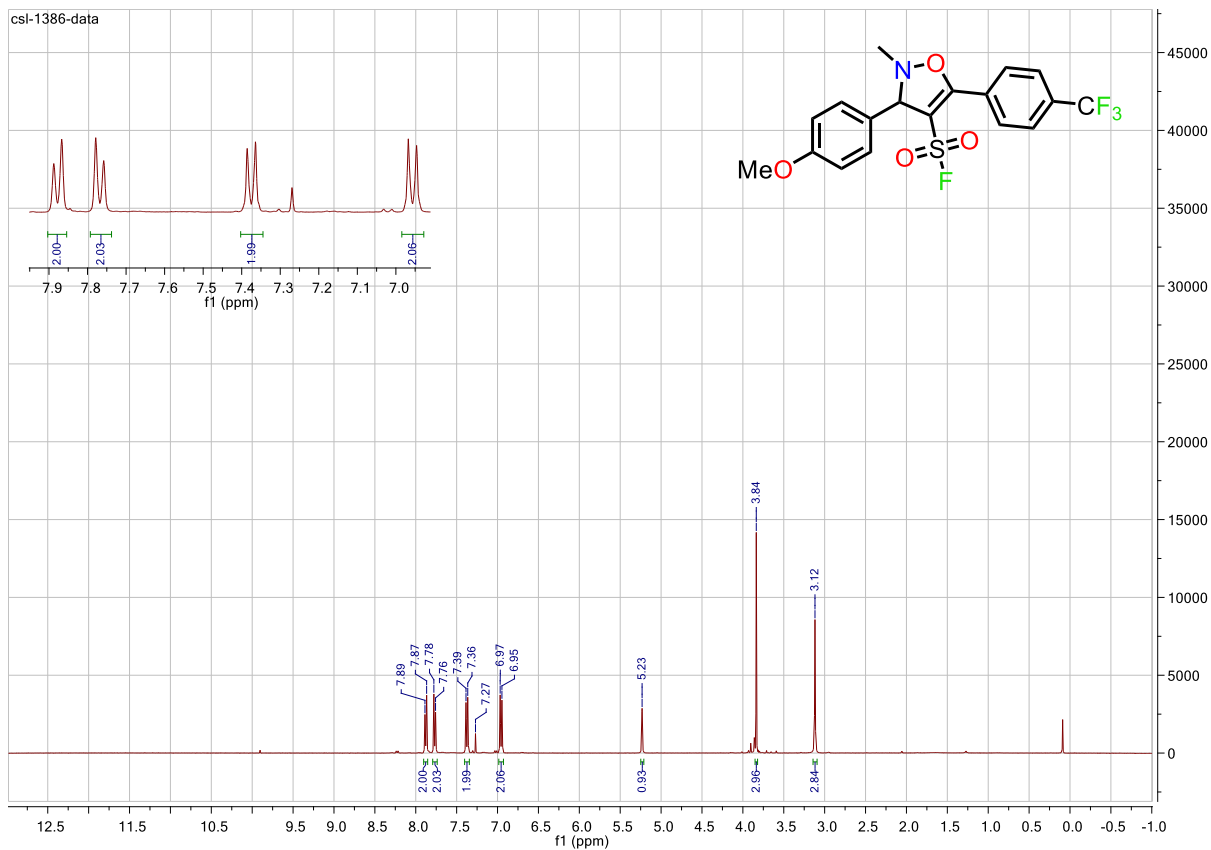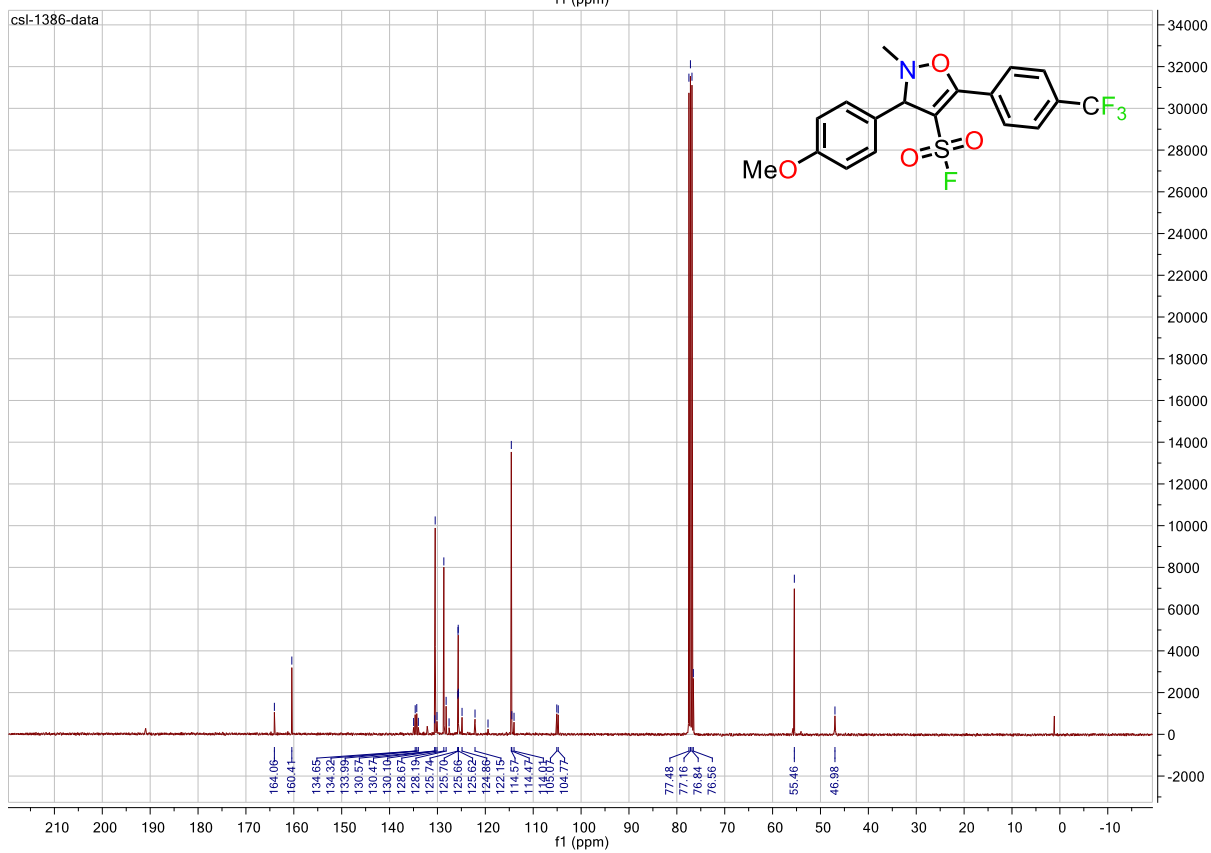

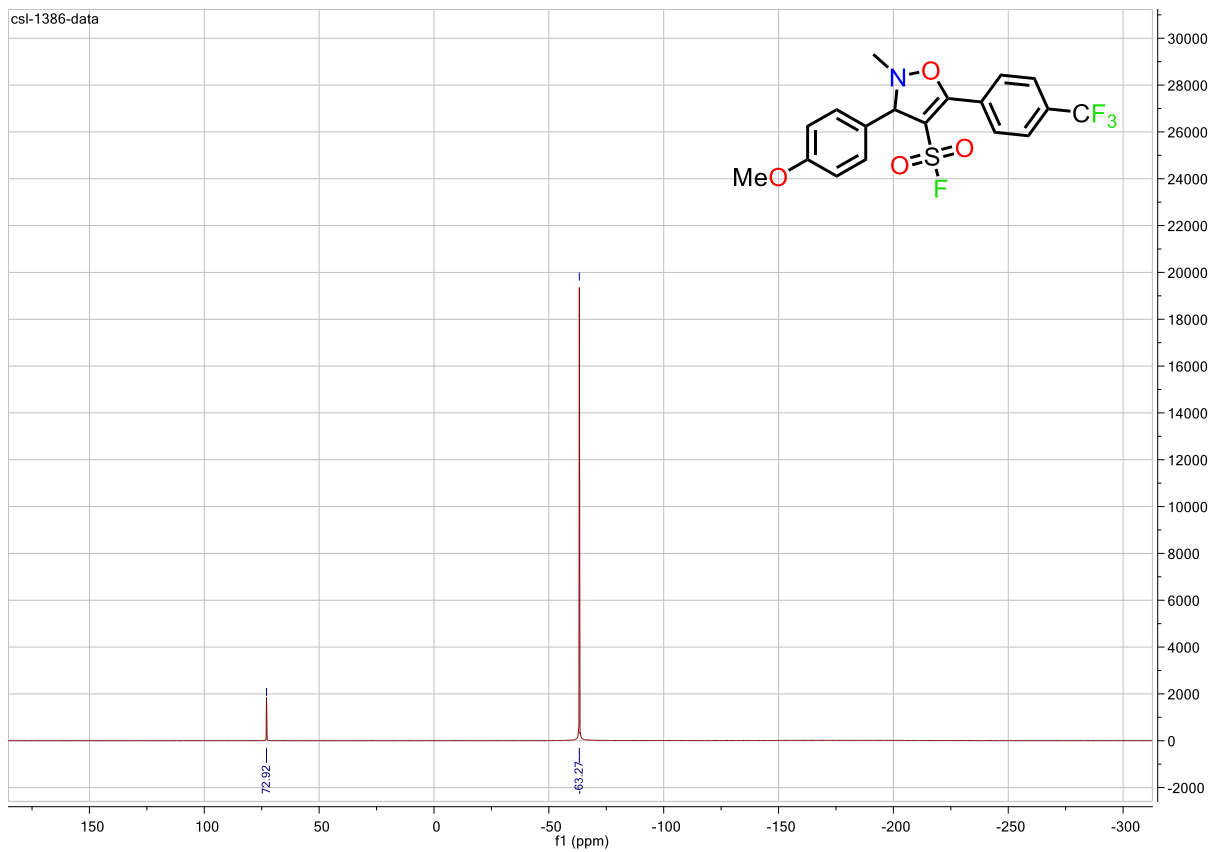

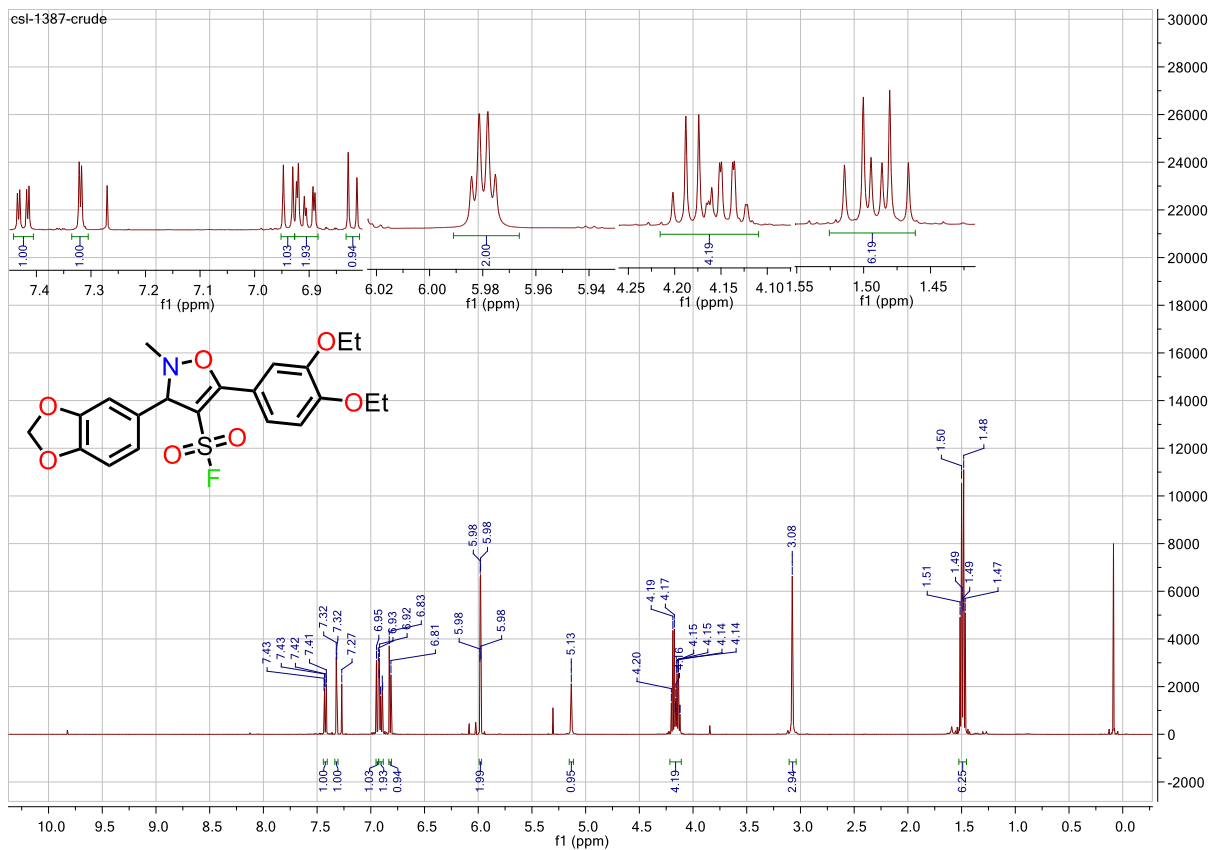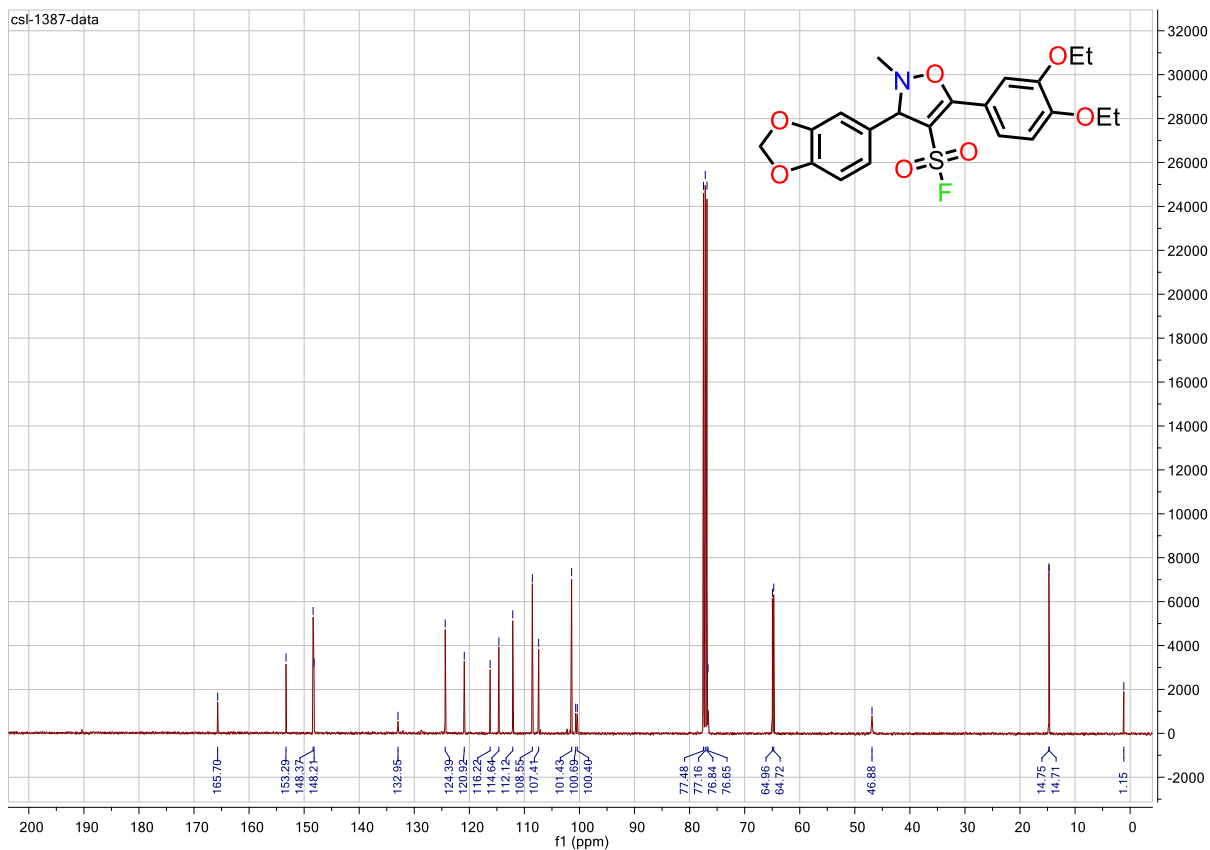

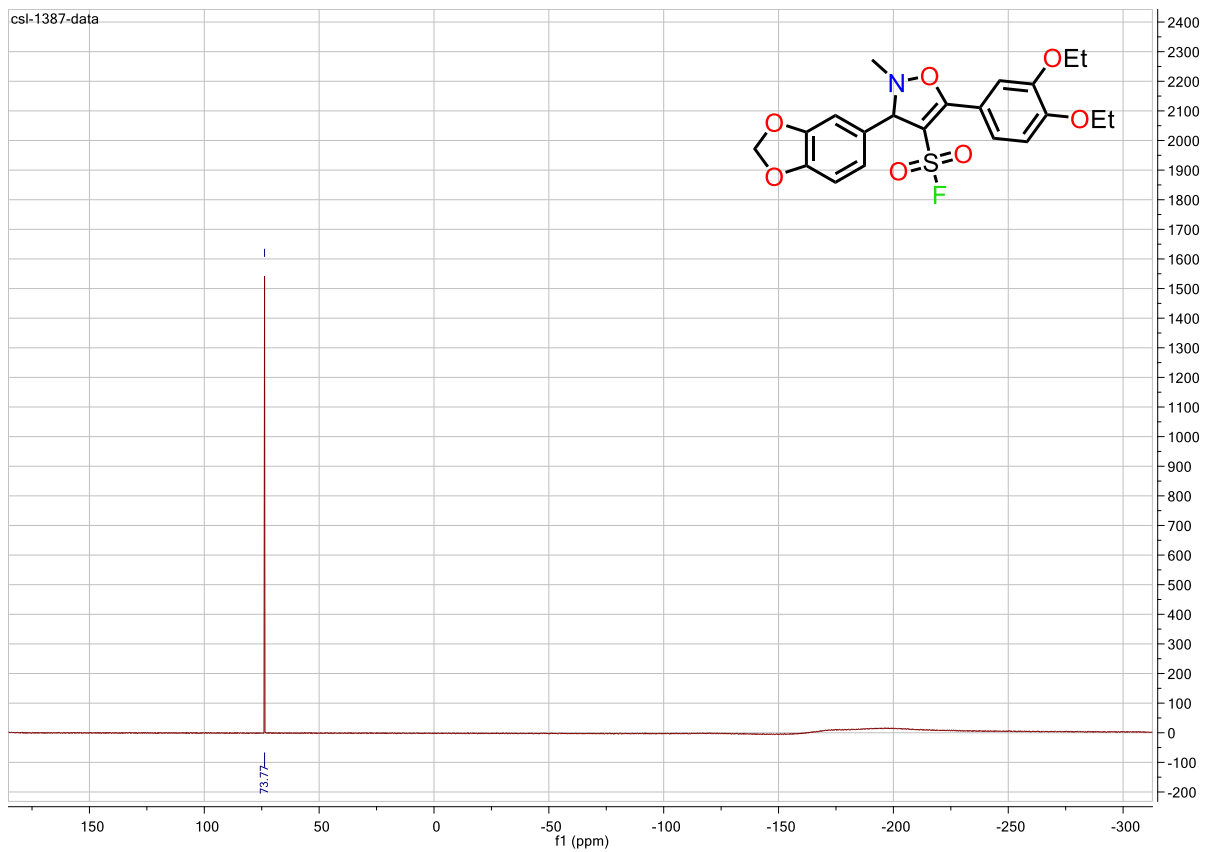

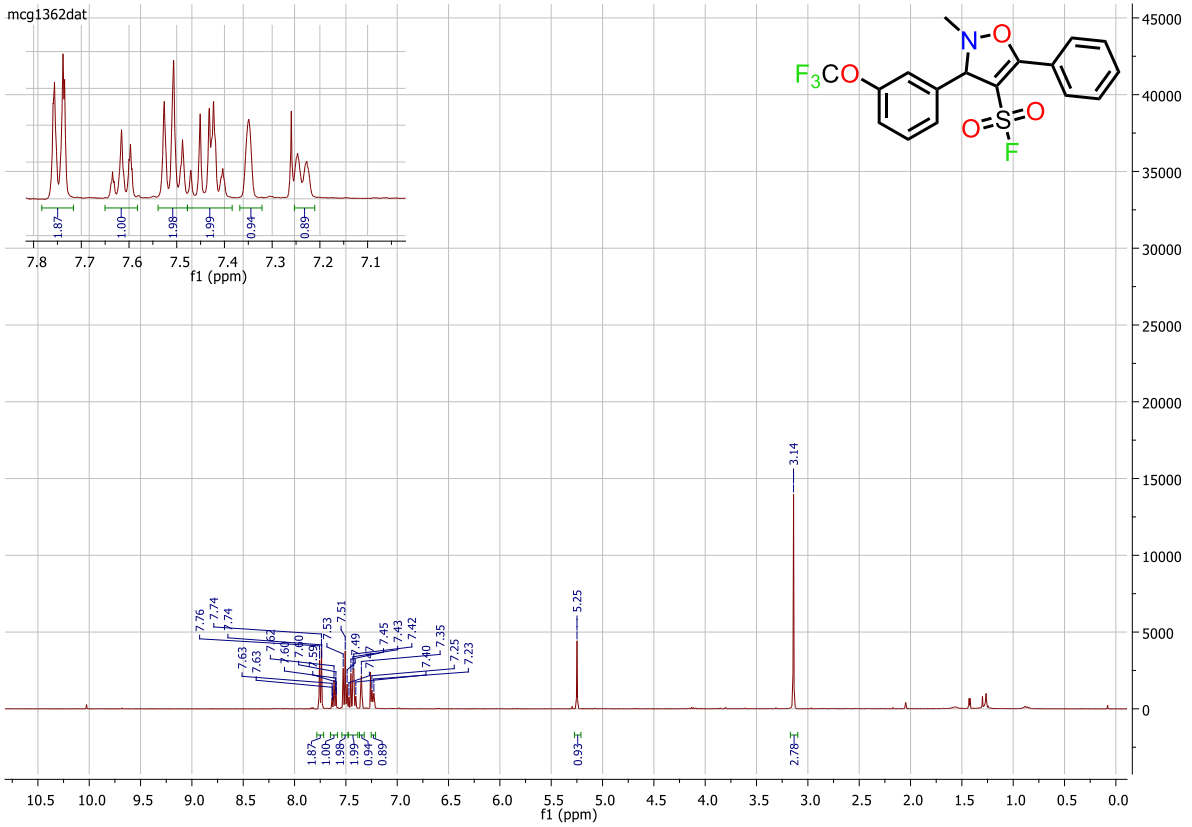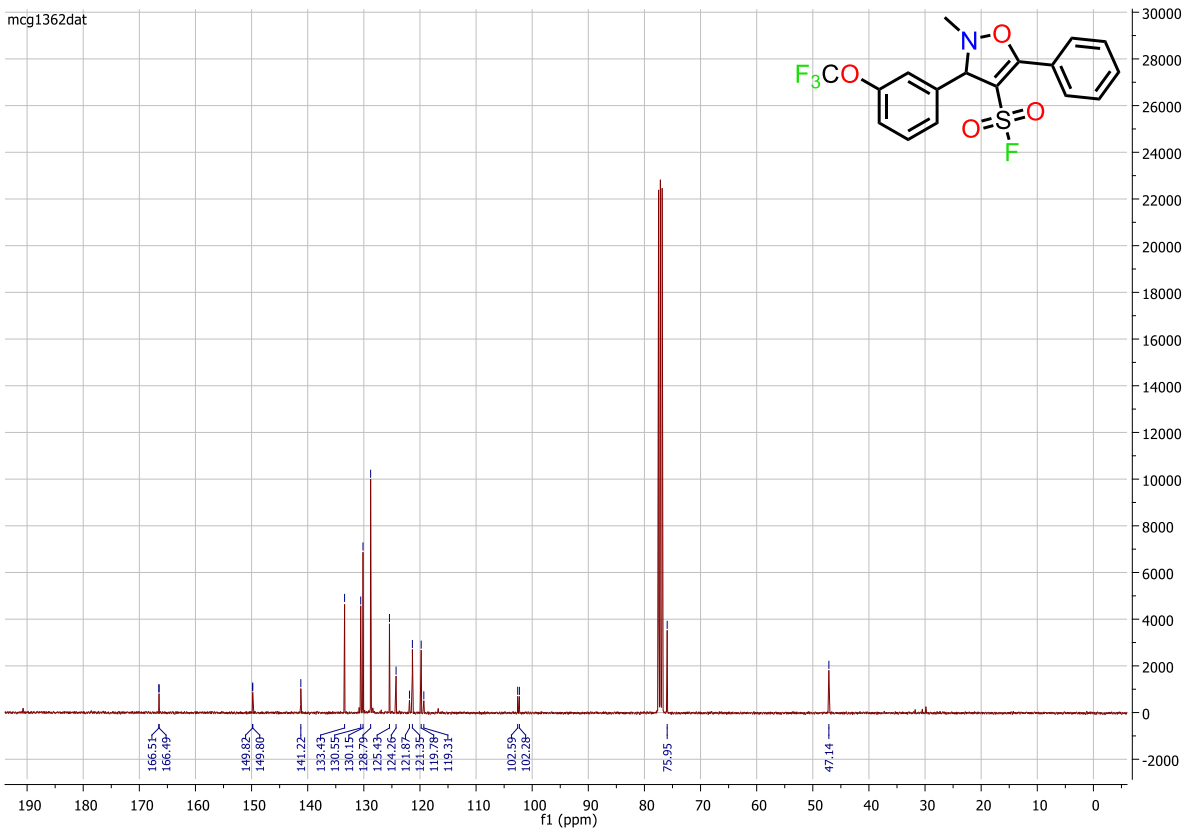



mcg1362dat

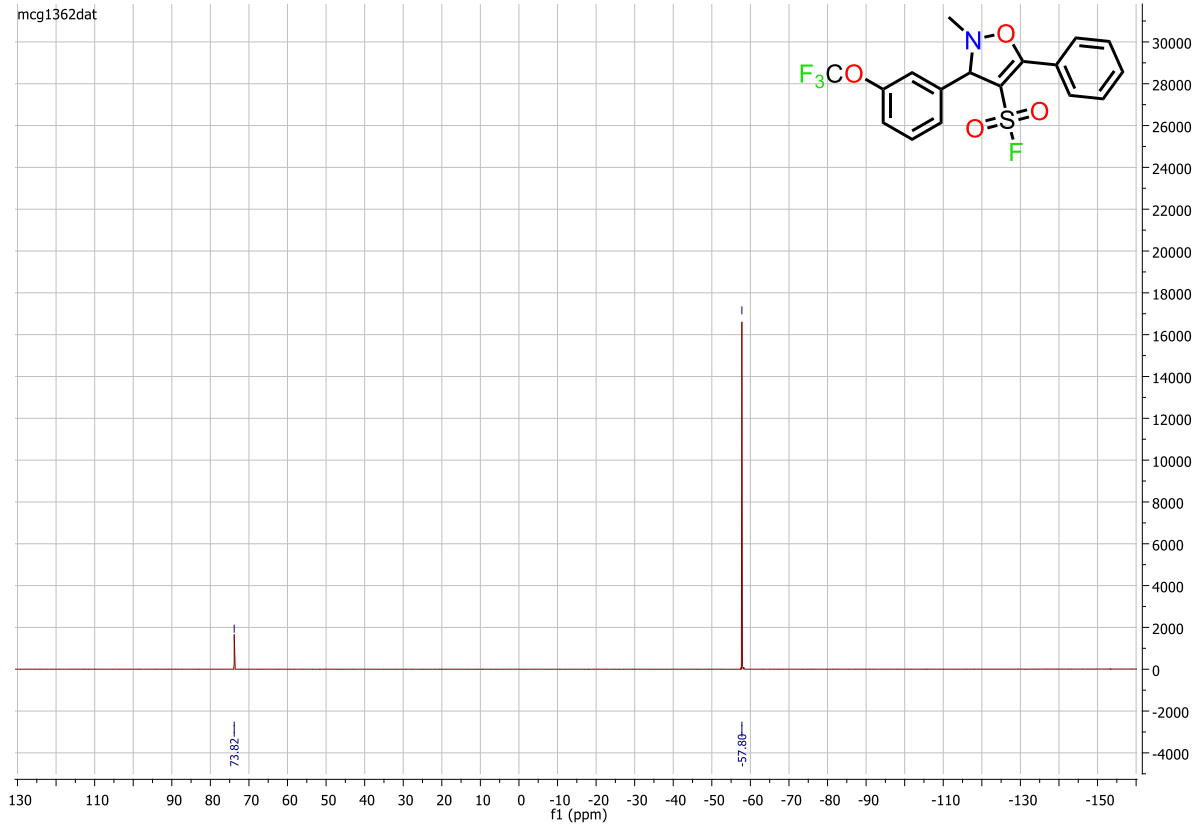



mcg1364dat

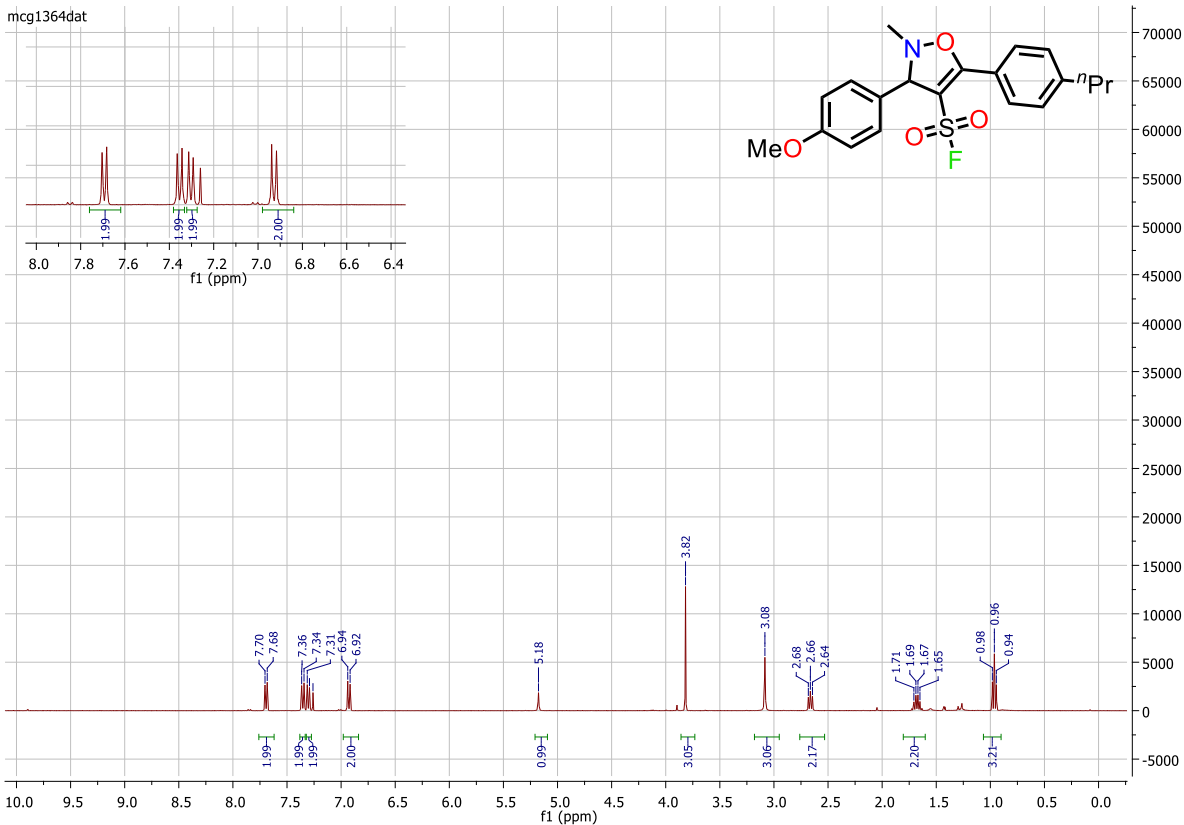

mcg1364dat

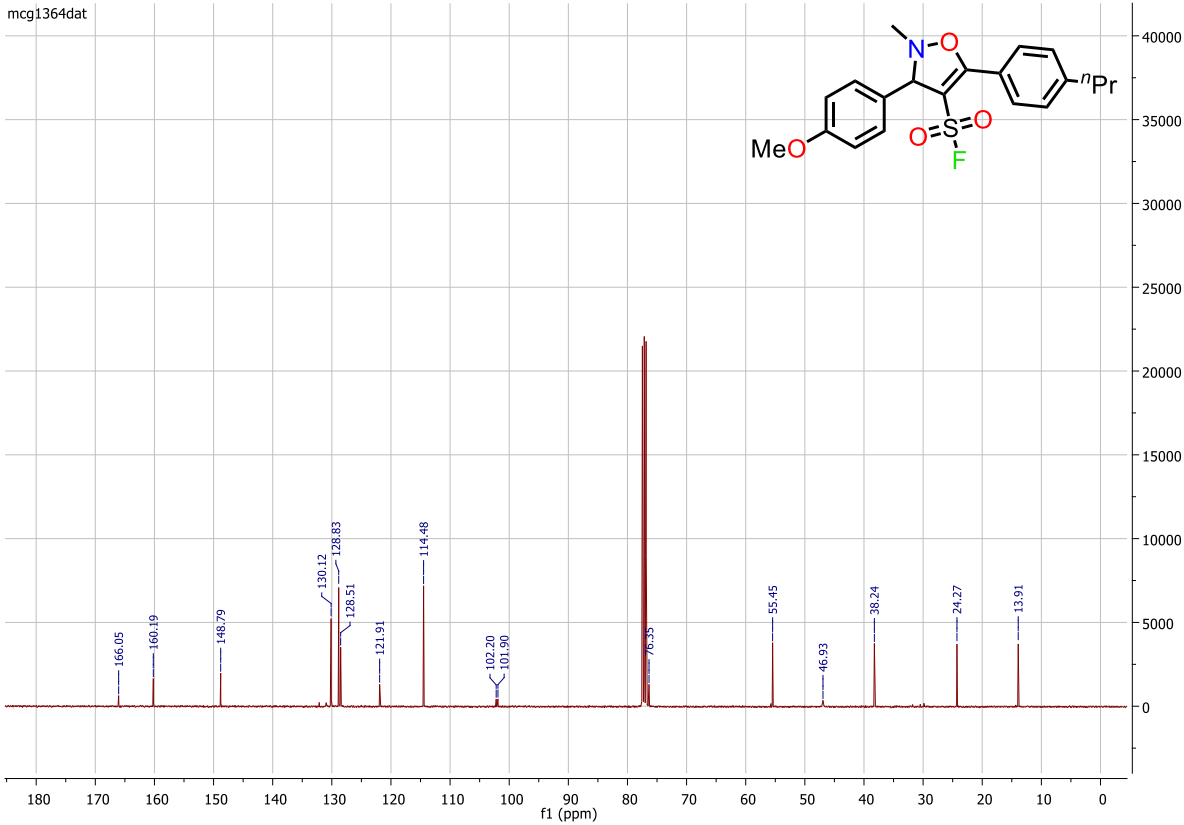

mcg1364dat

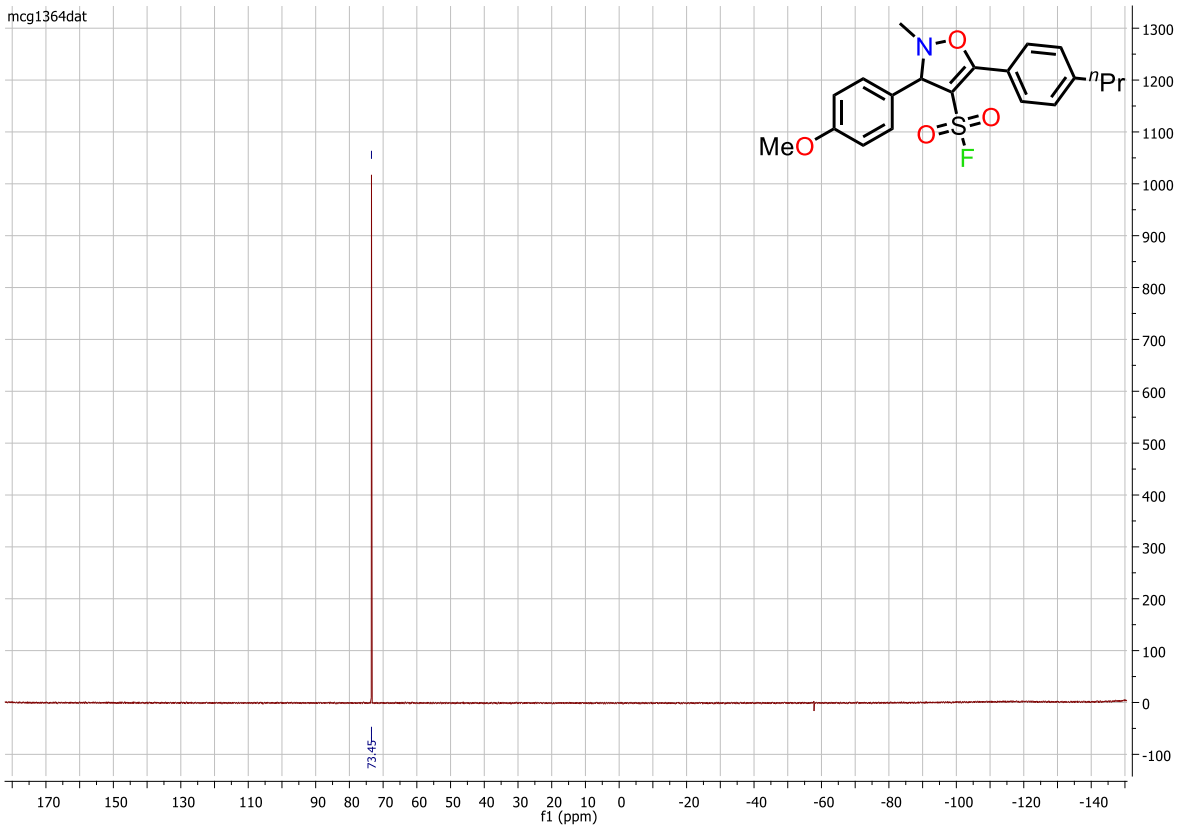

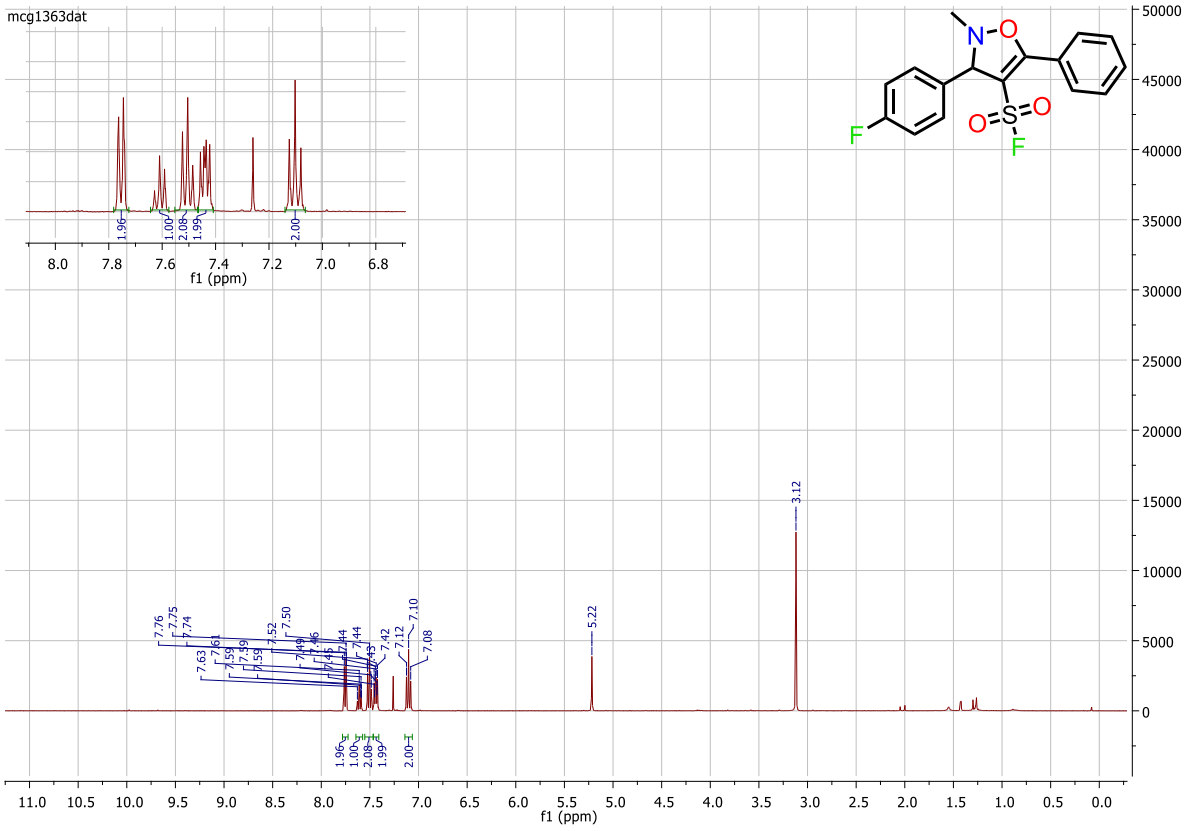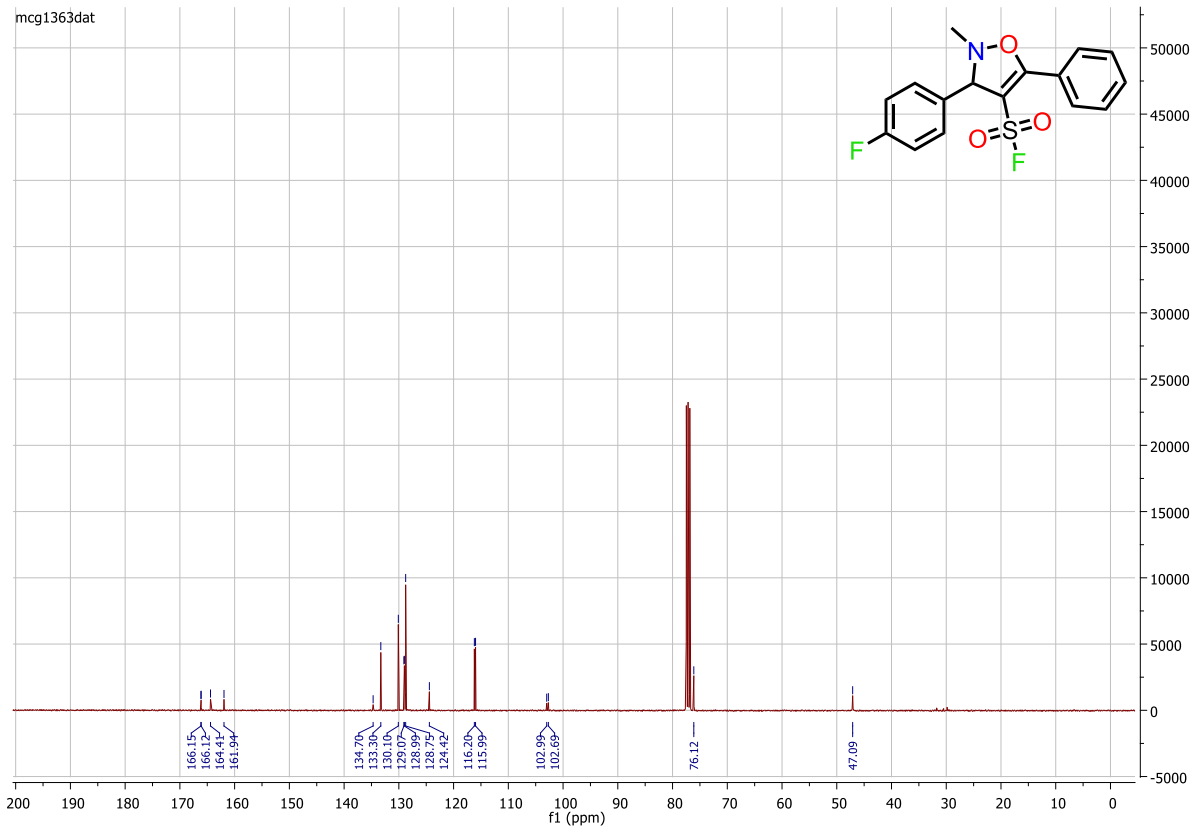

mcg1363dat

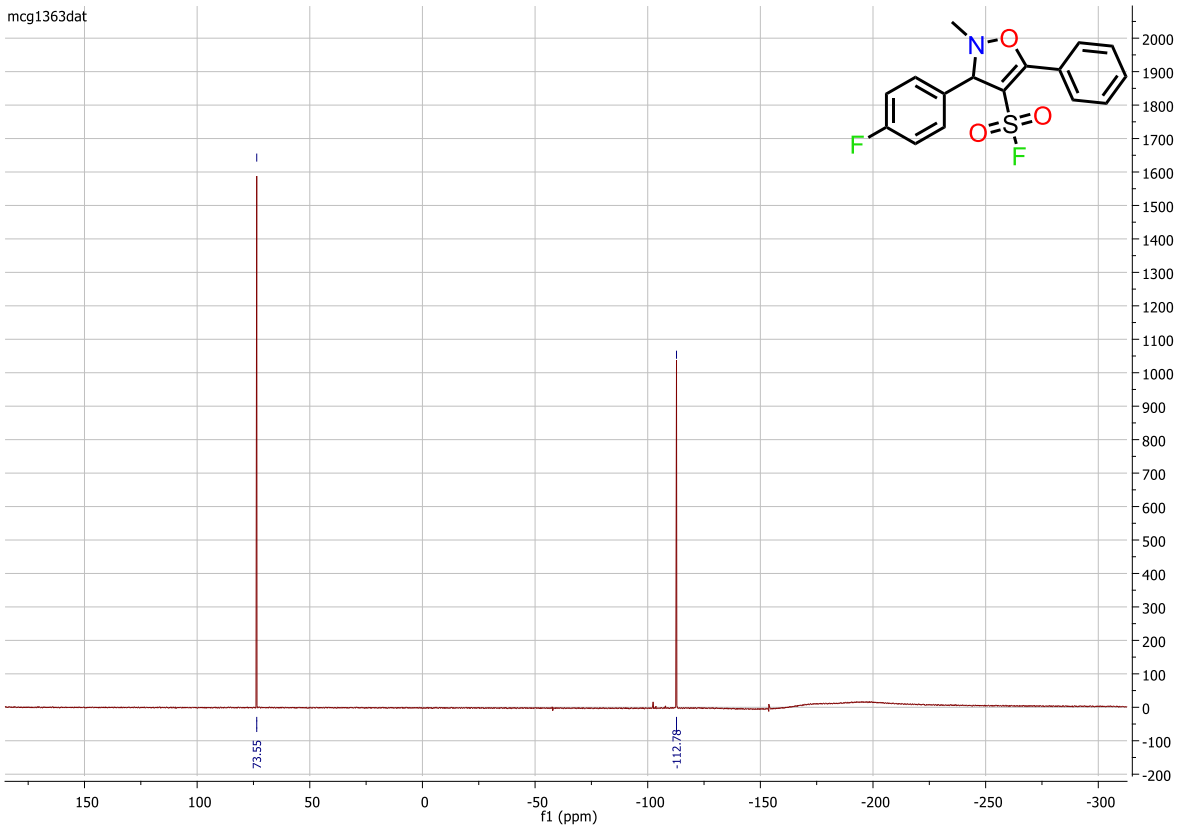

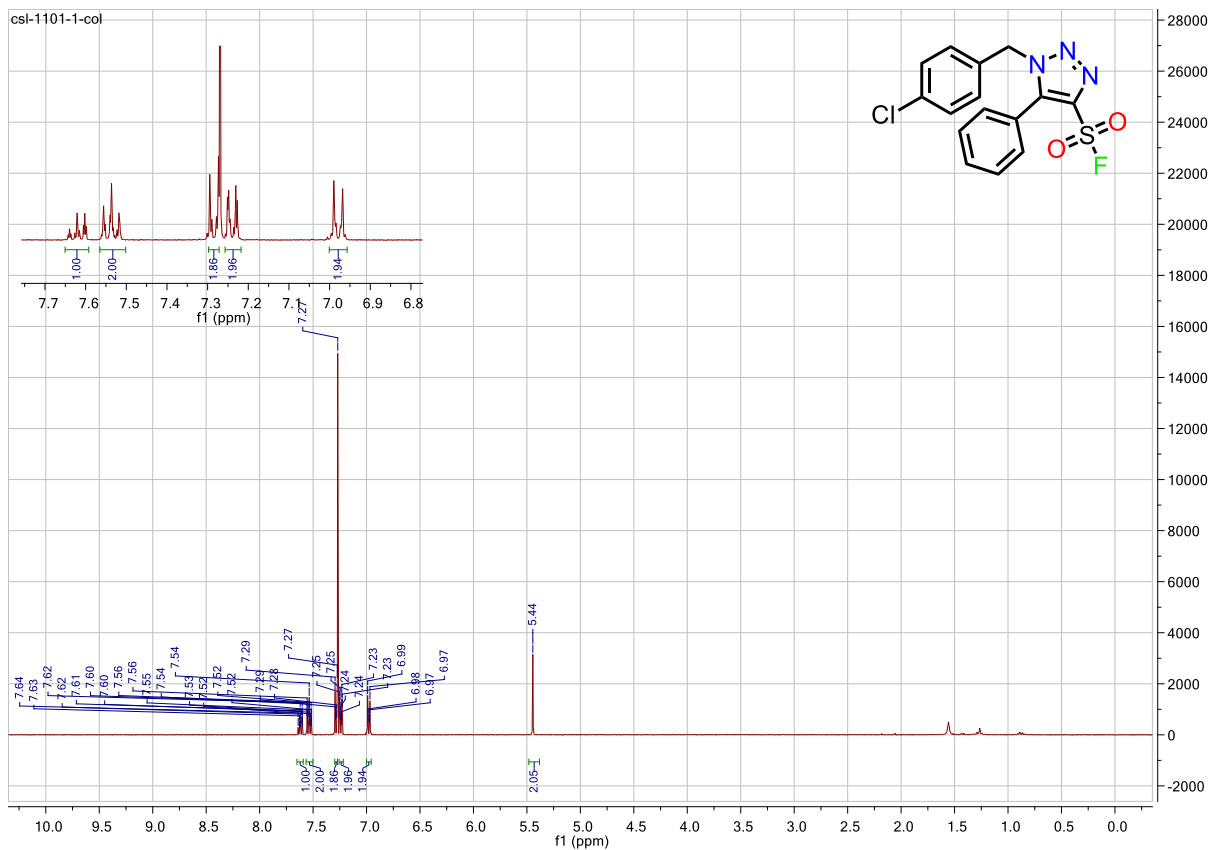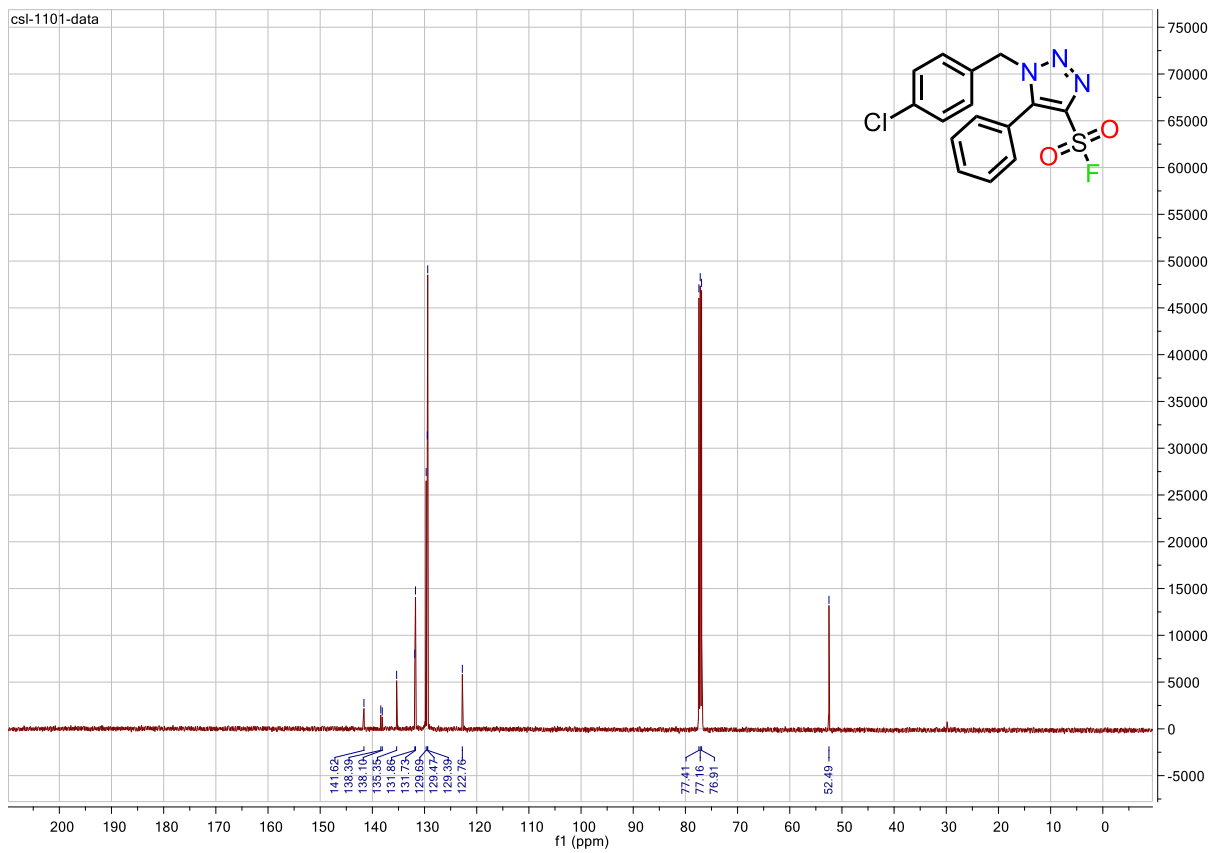

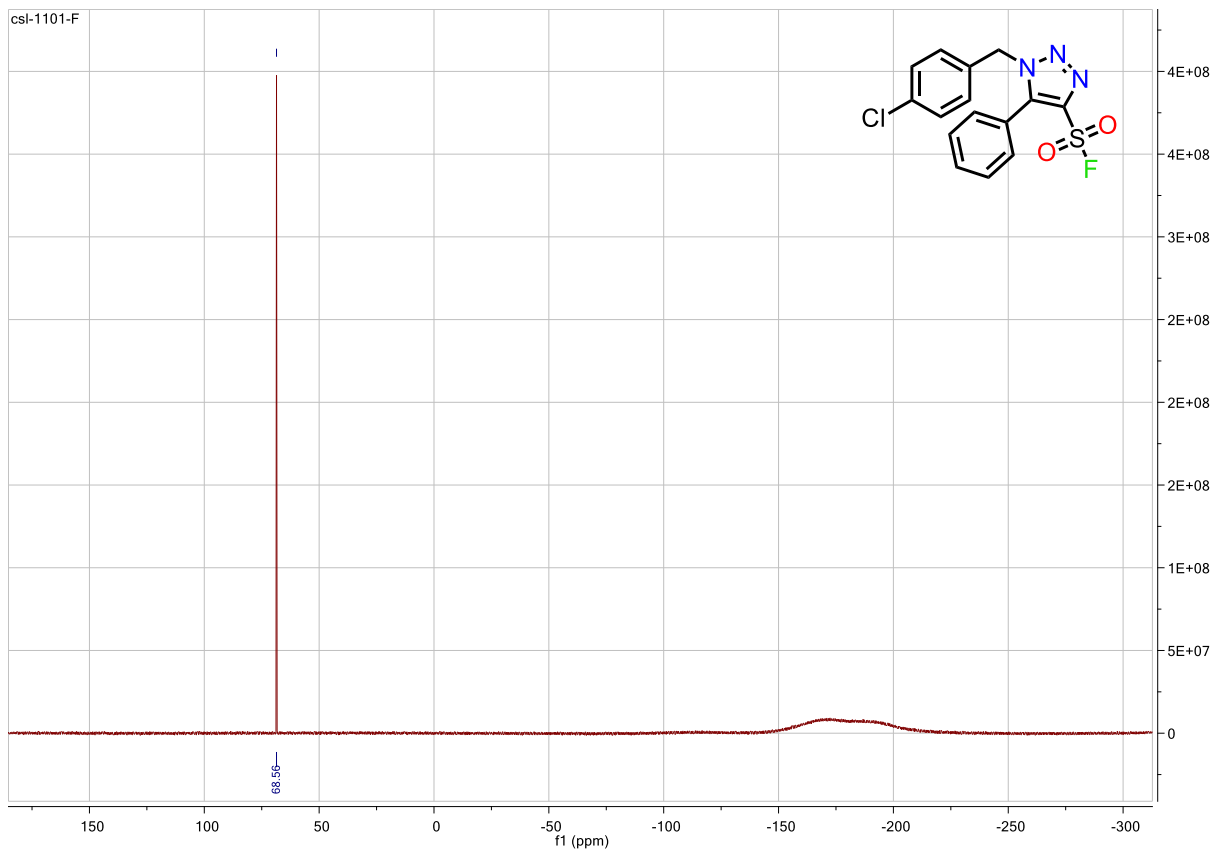



mcg1214dat

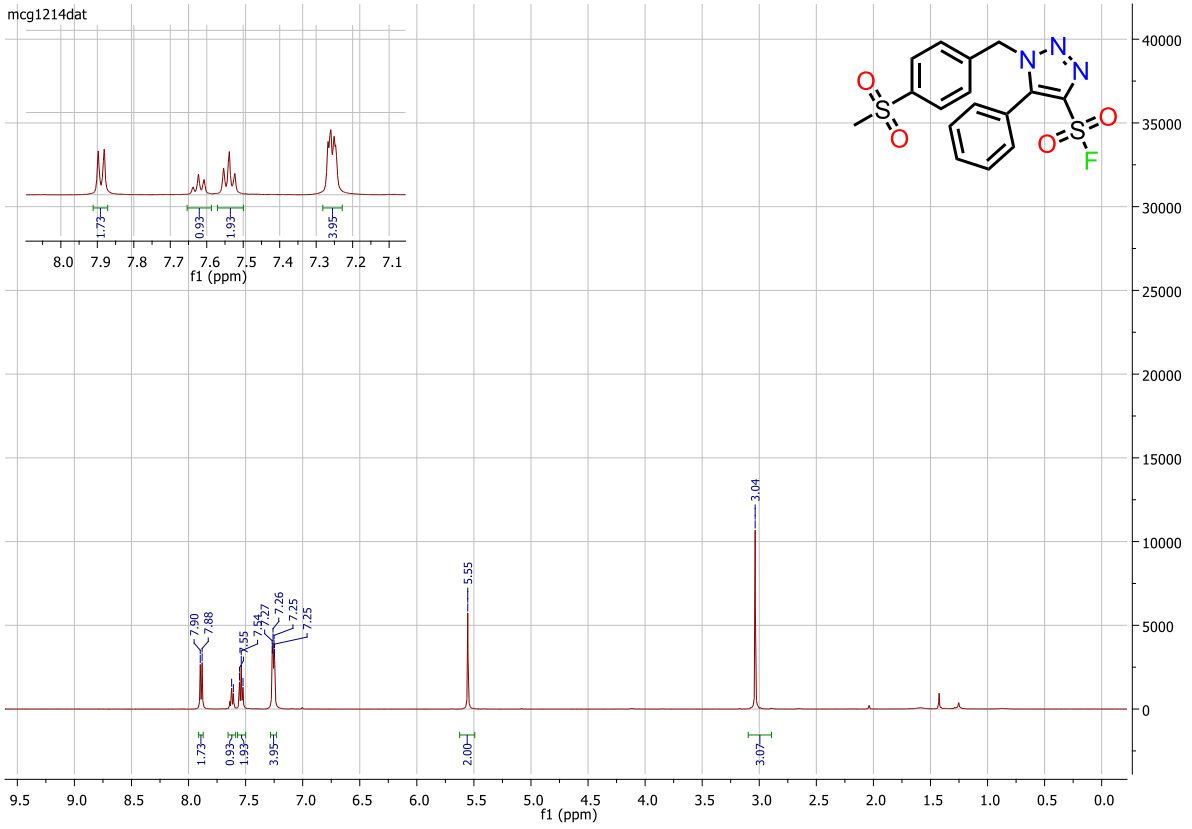

mcg1214dat

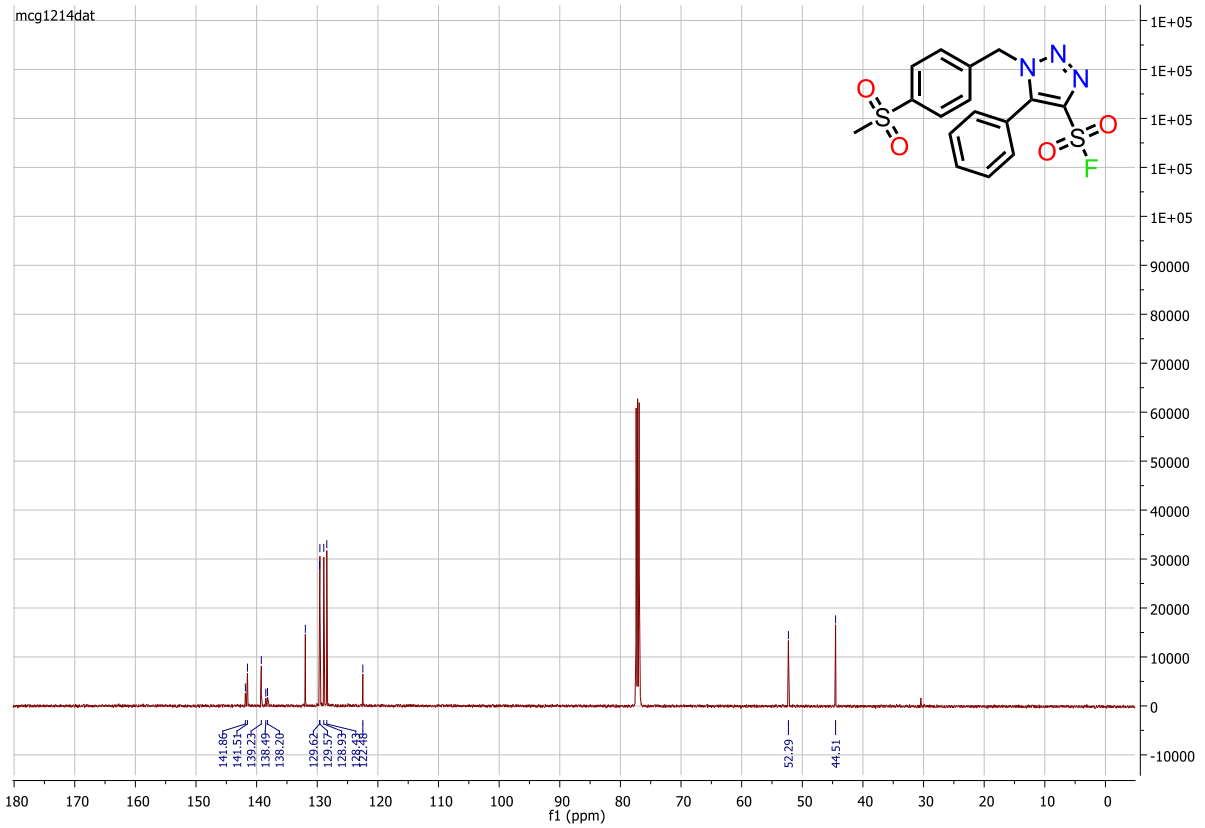

mcg1214-F

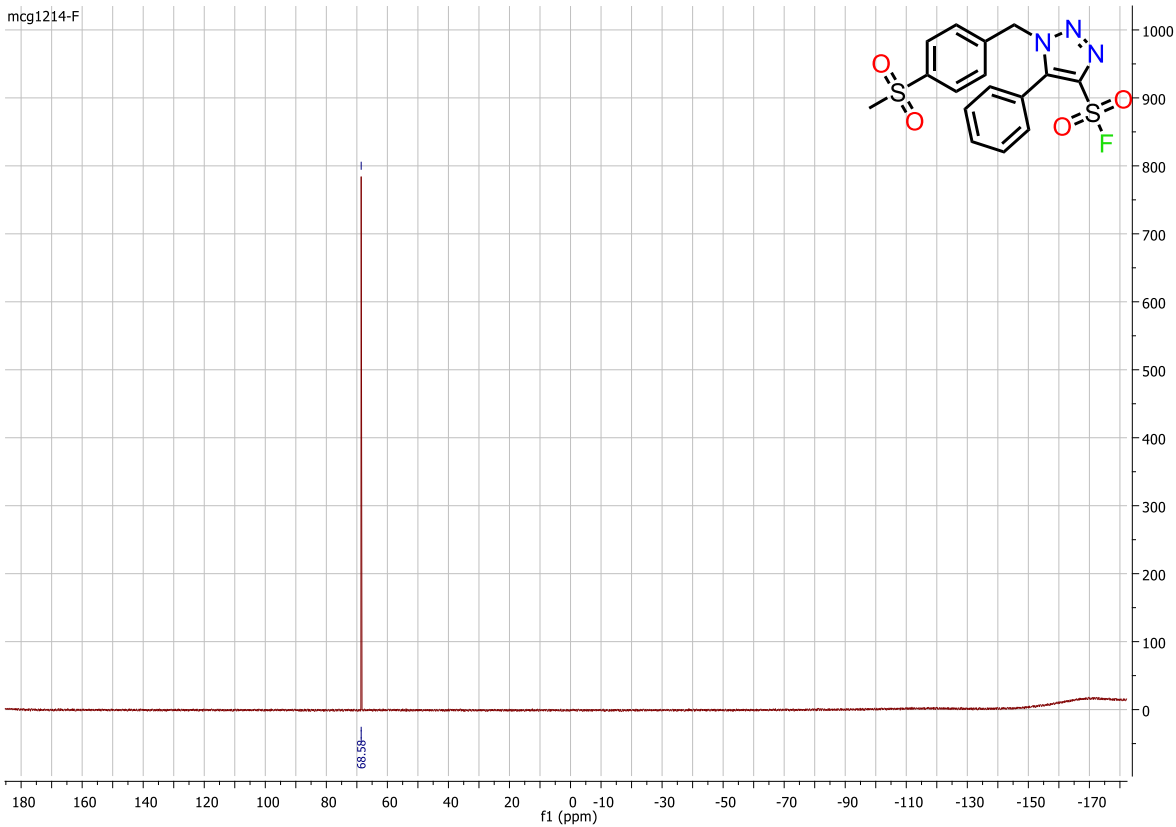

mcg1215dat

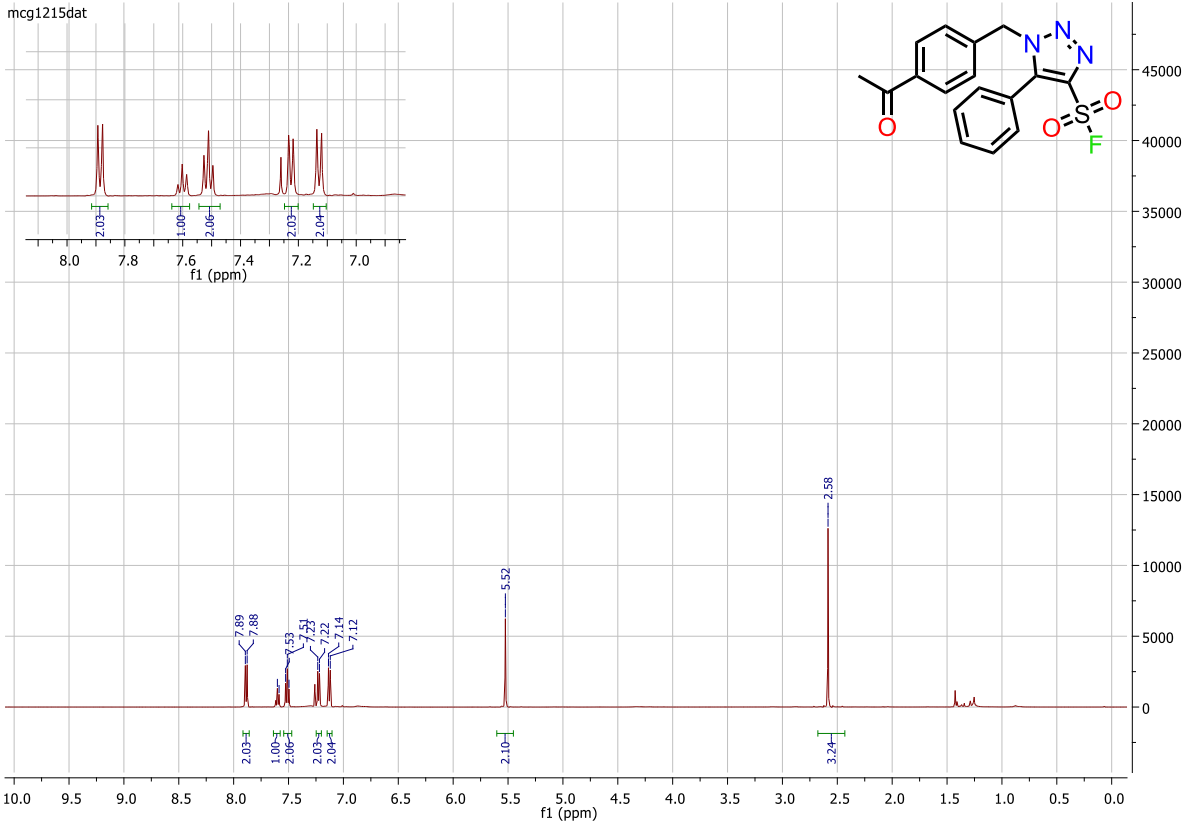

mcg1215dat

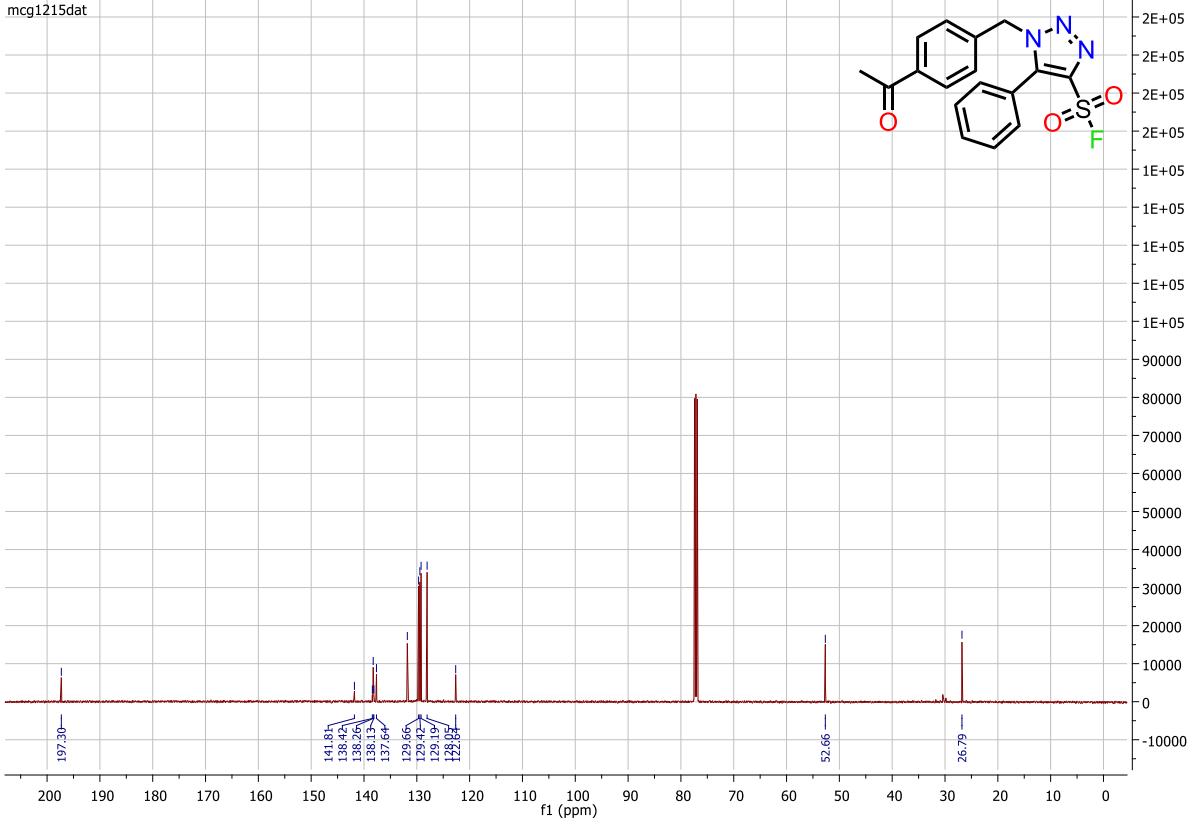

mcg1215-F

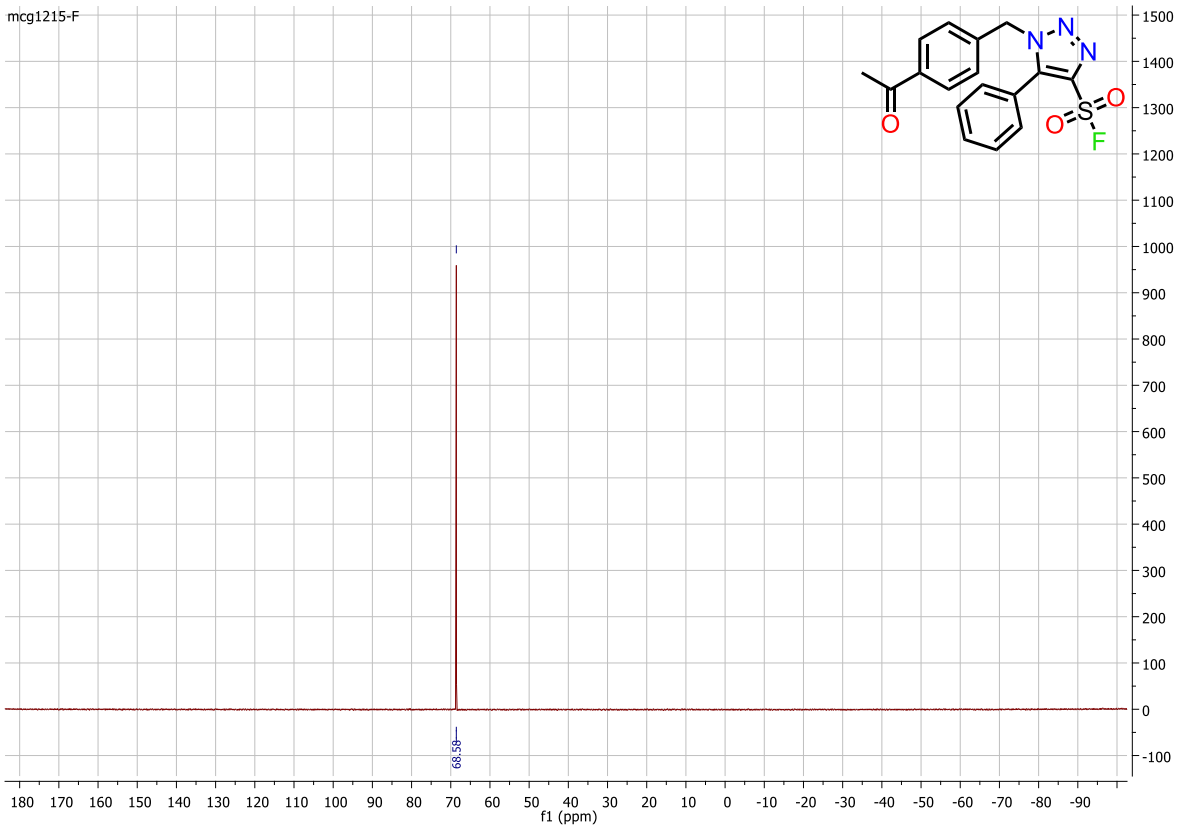

mcg1212dat

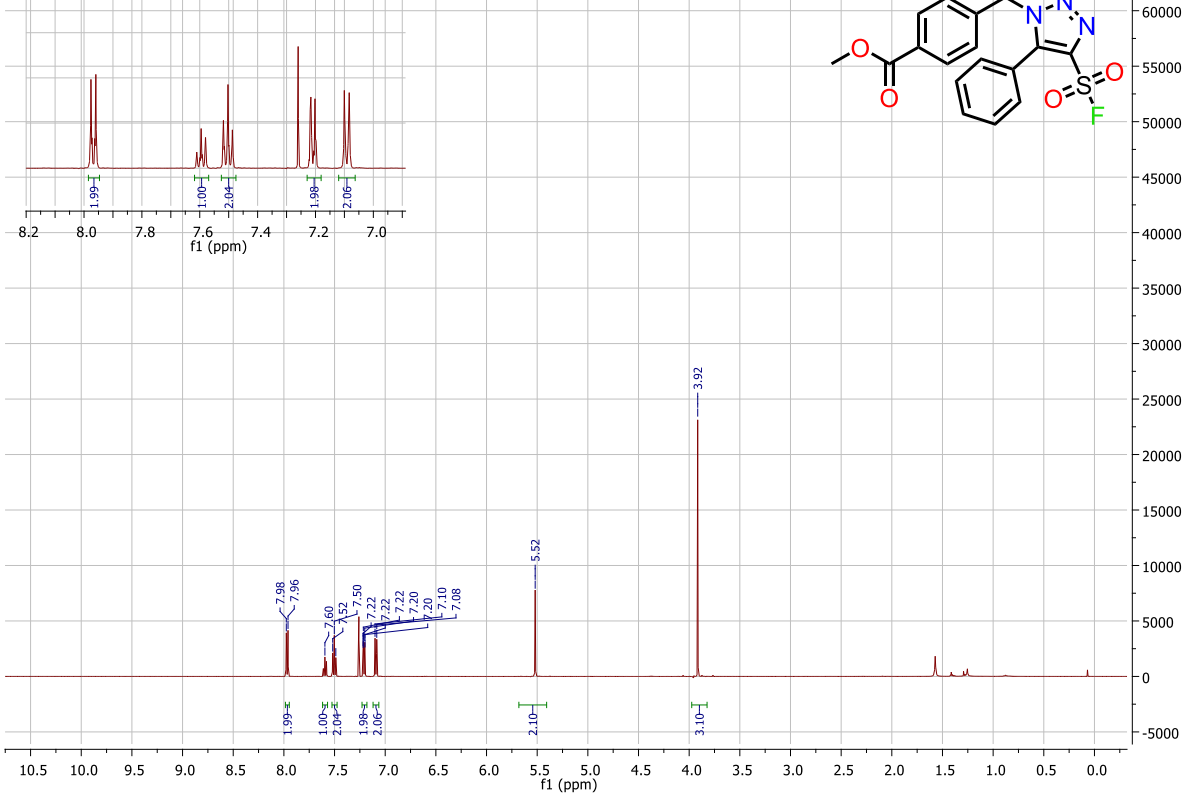

mcg1212dat

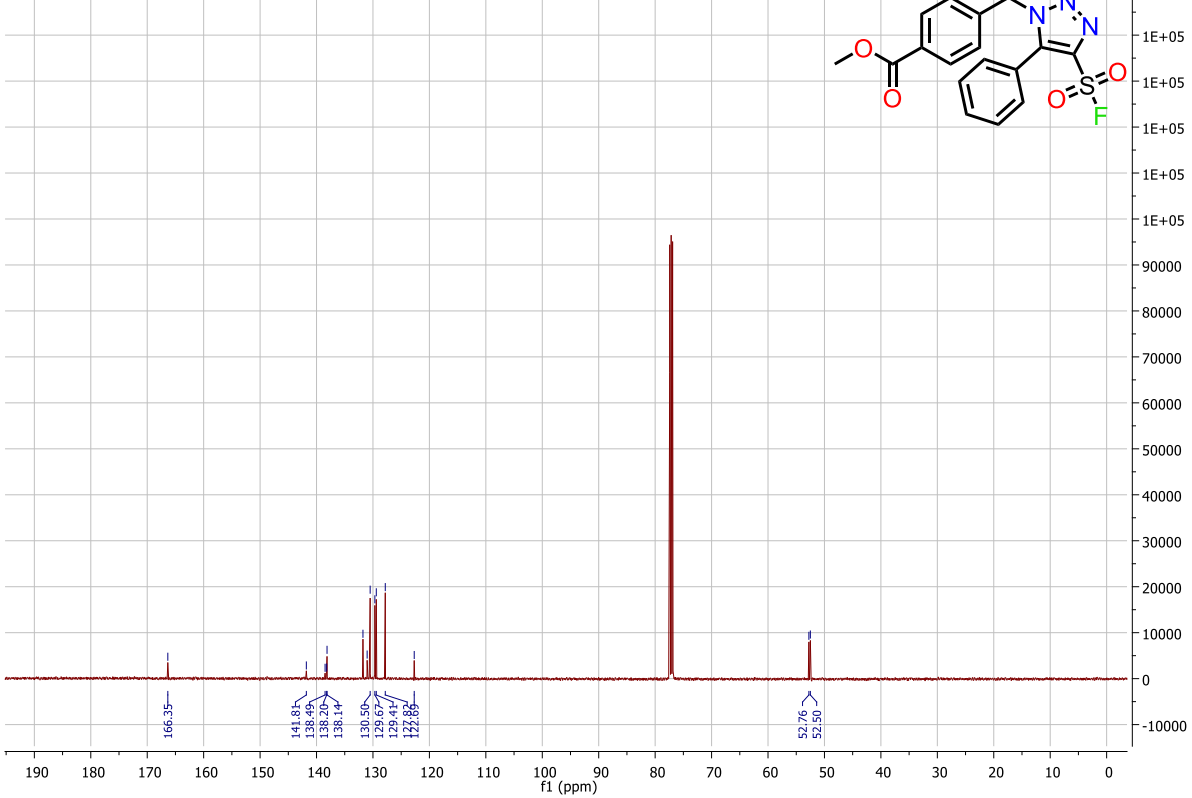

mcg1212-F

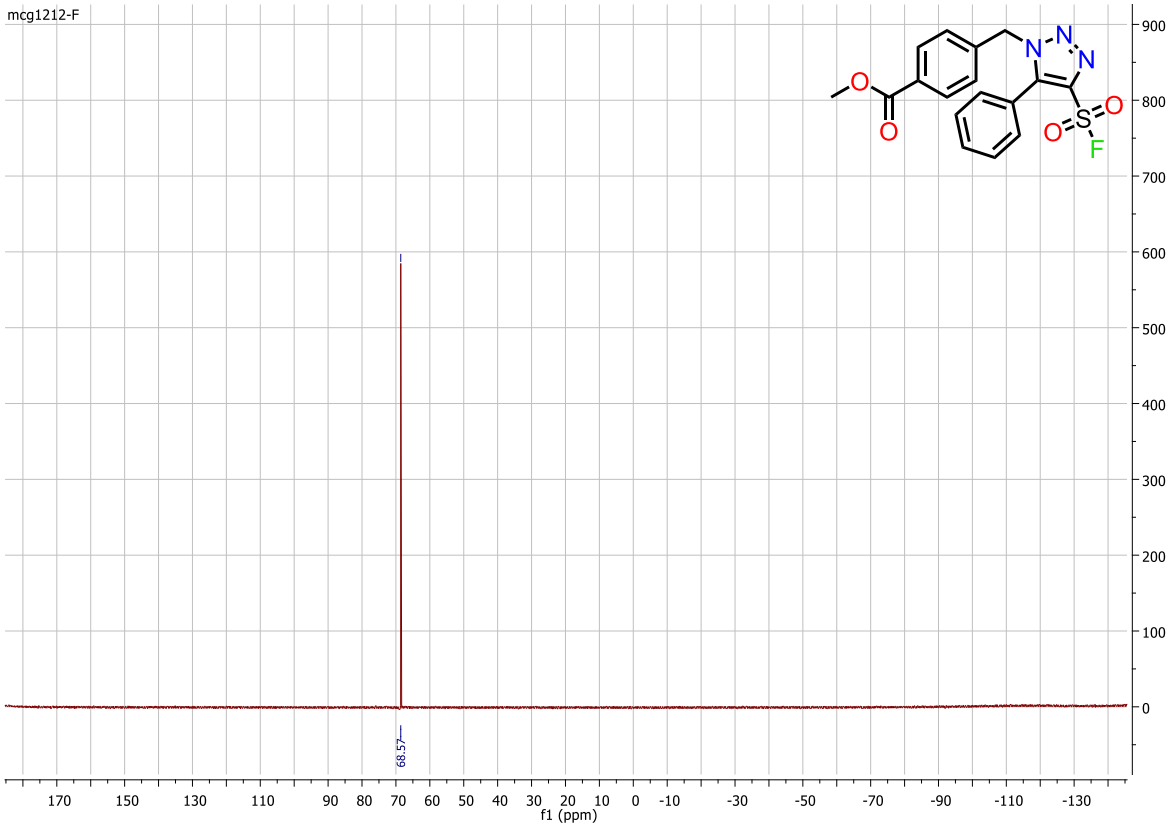

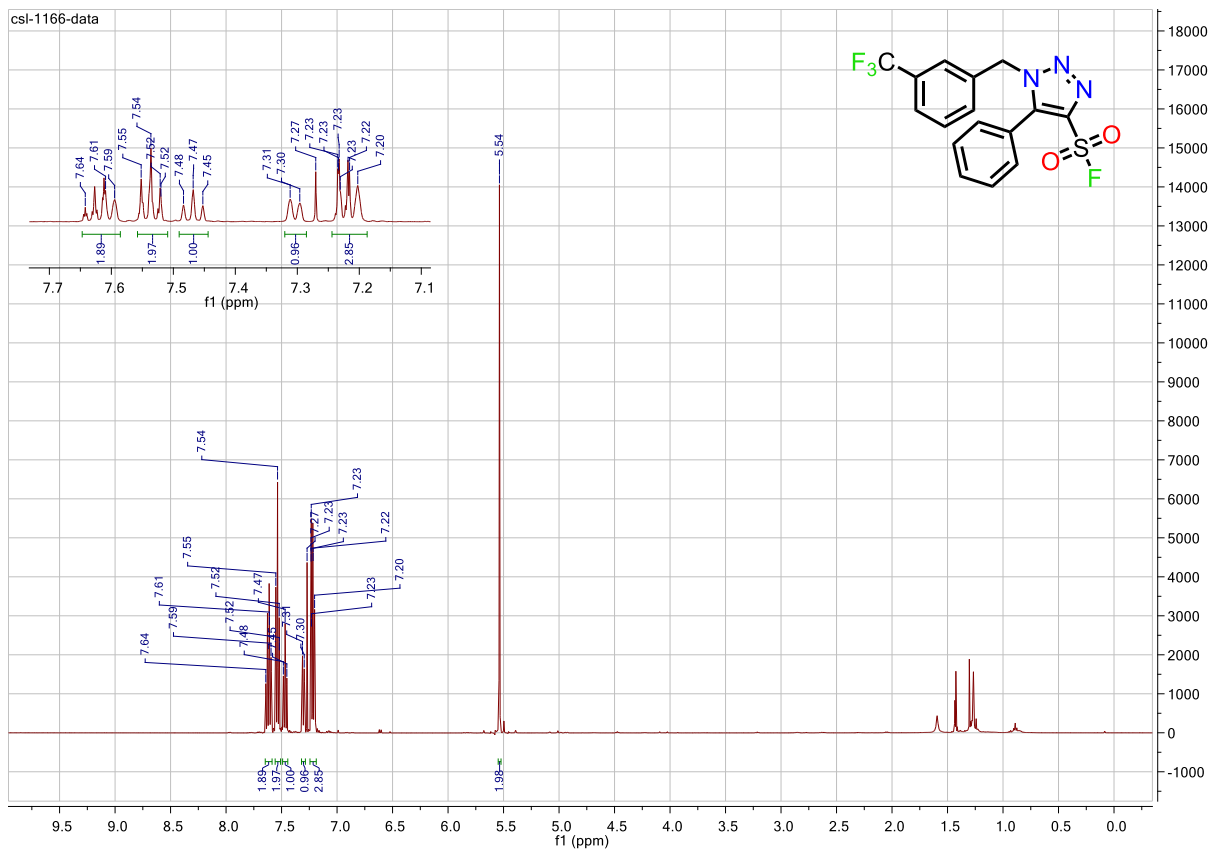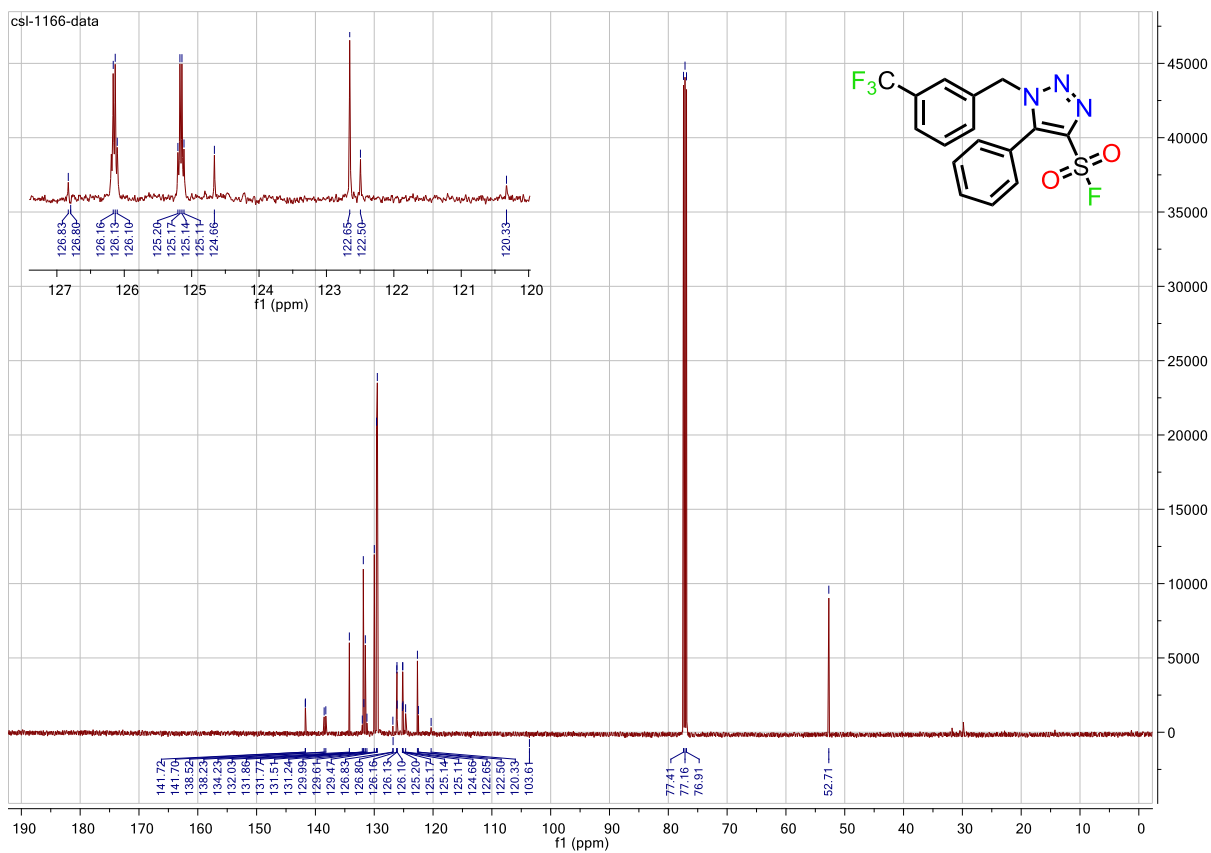

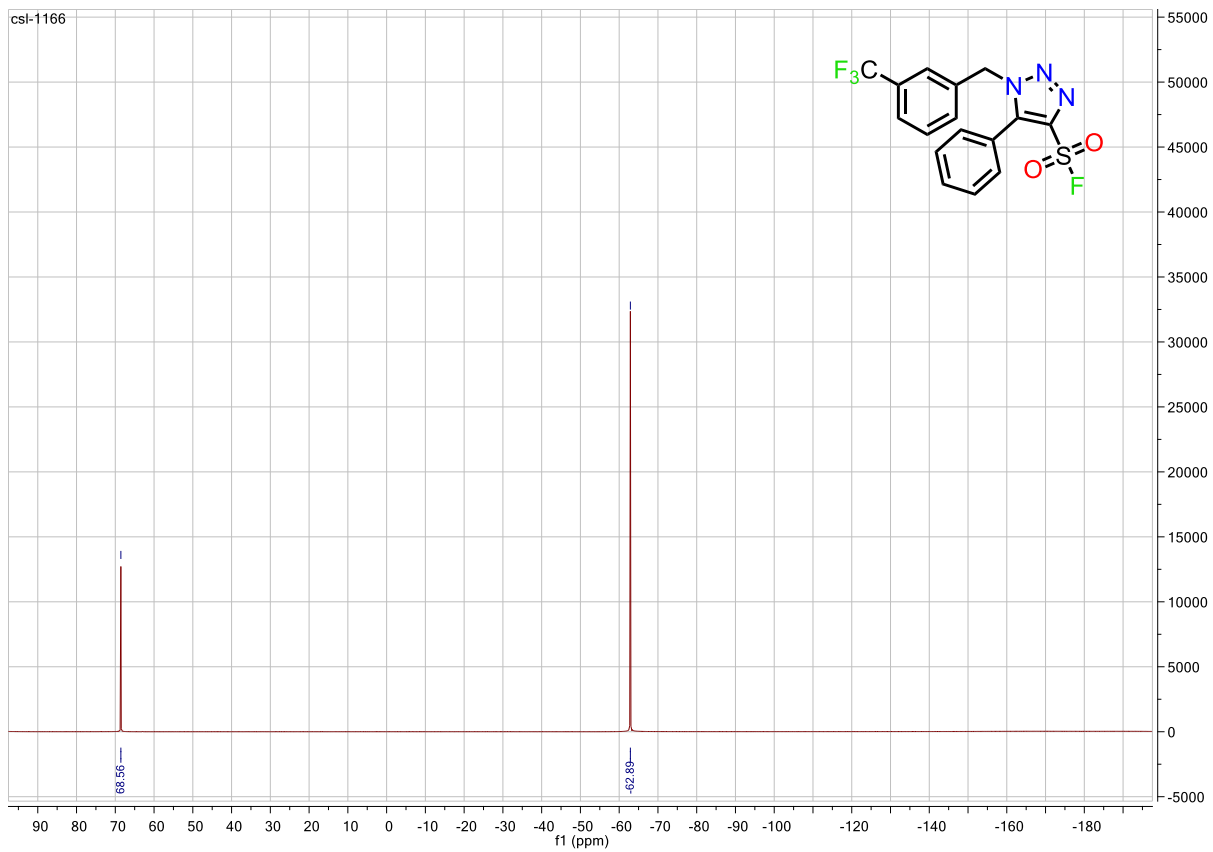



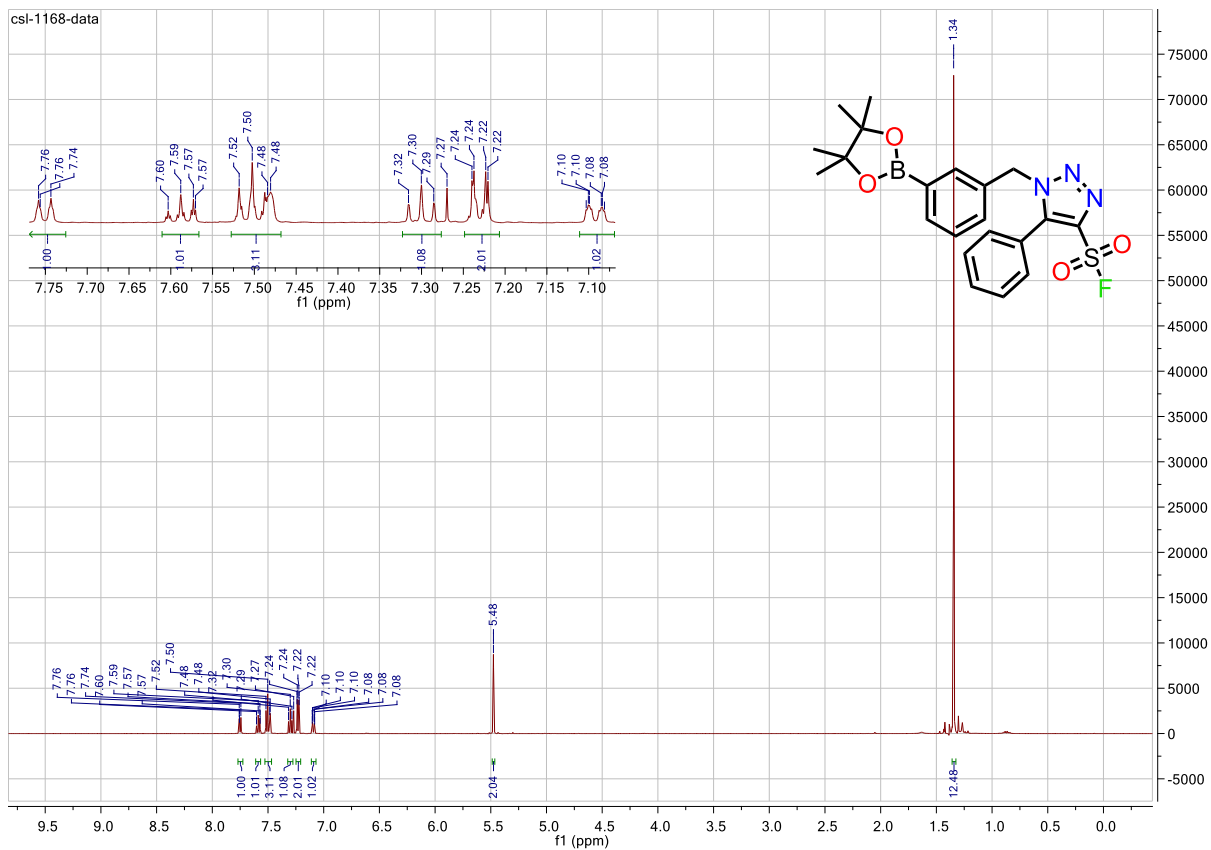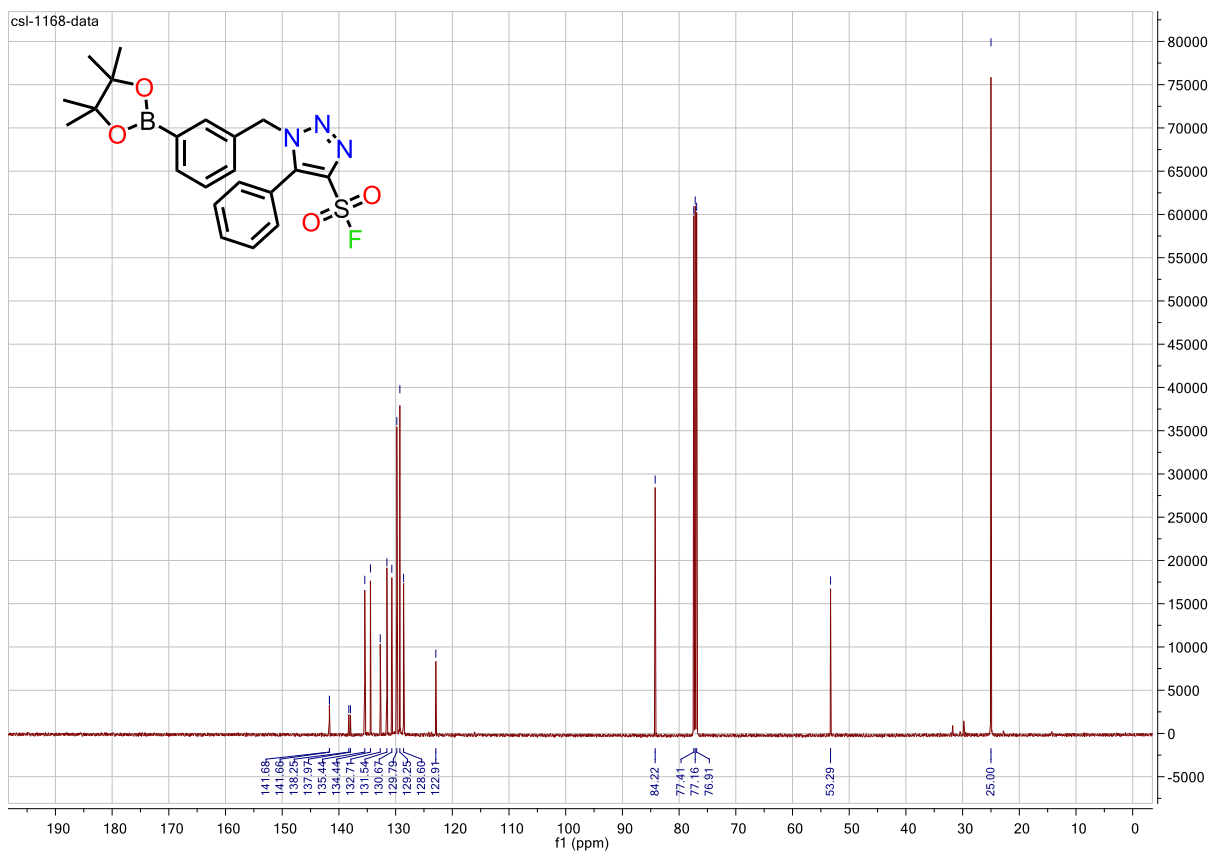

csi-1168

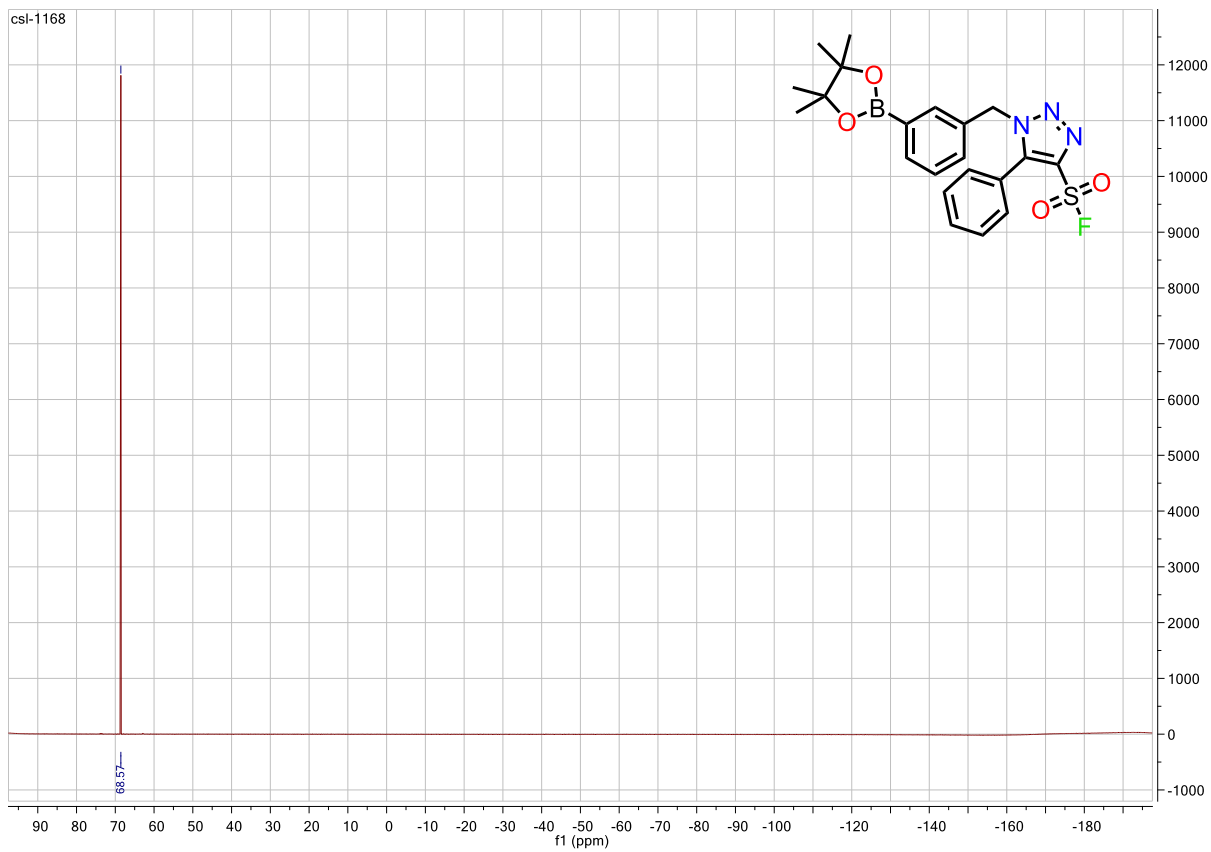

mcg1213dat

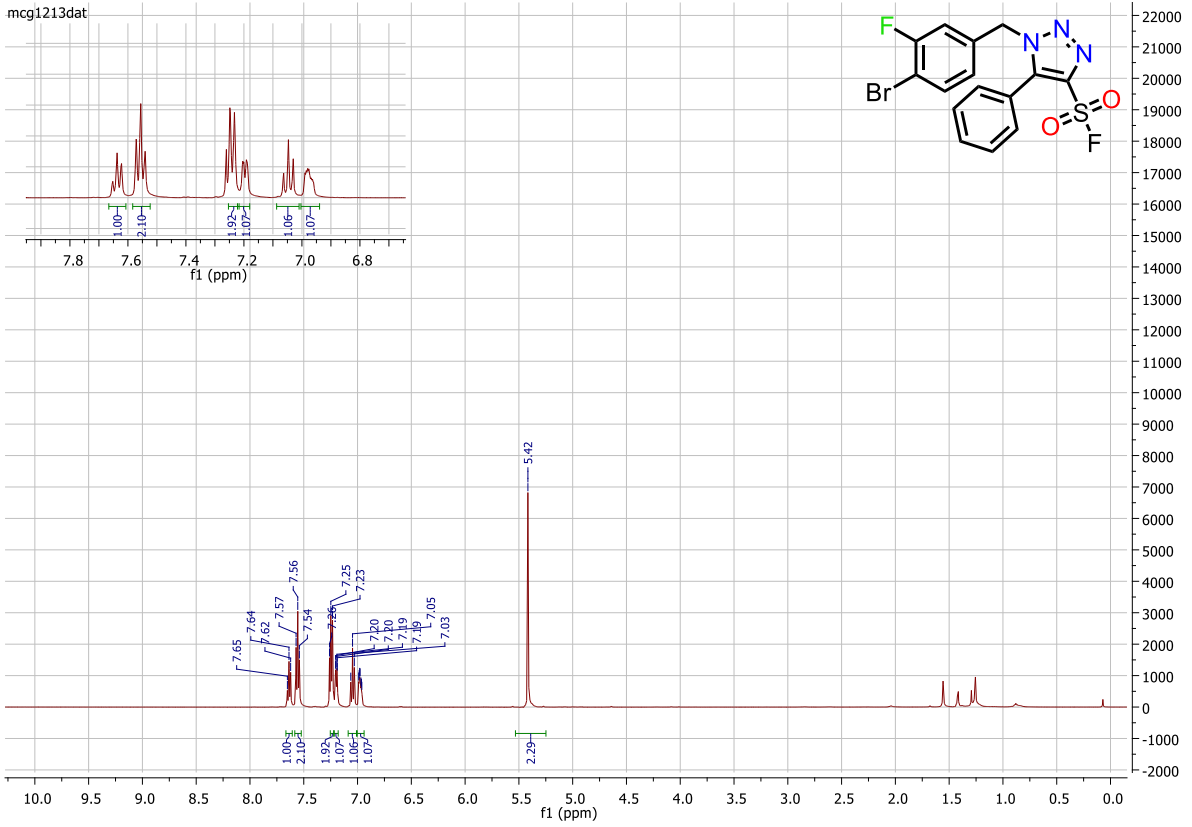

mcg1213dat

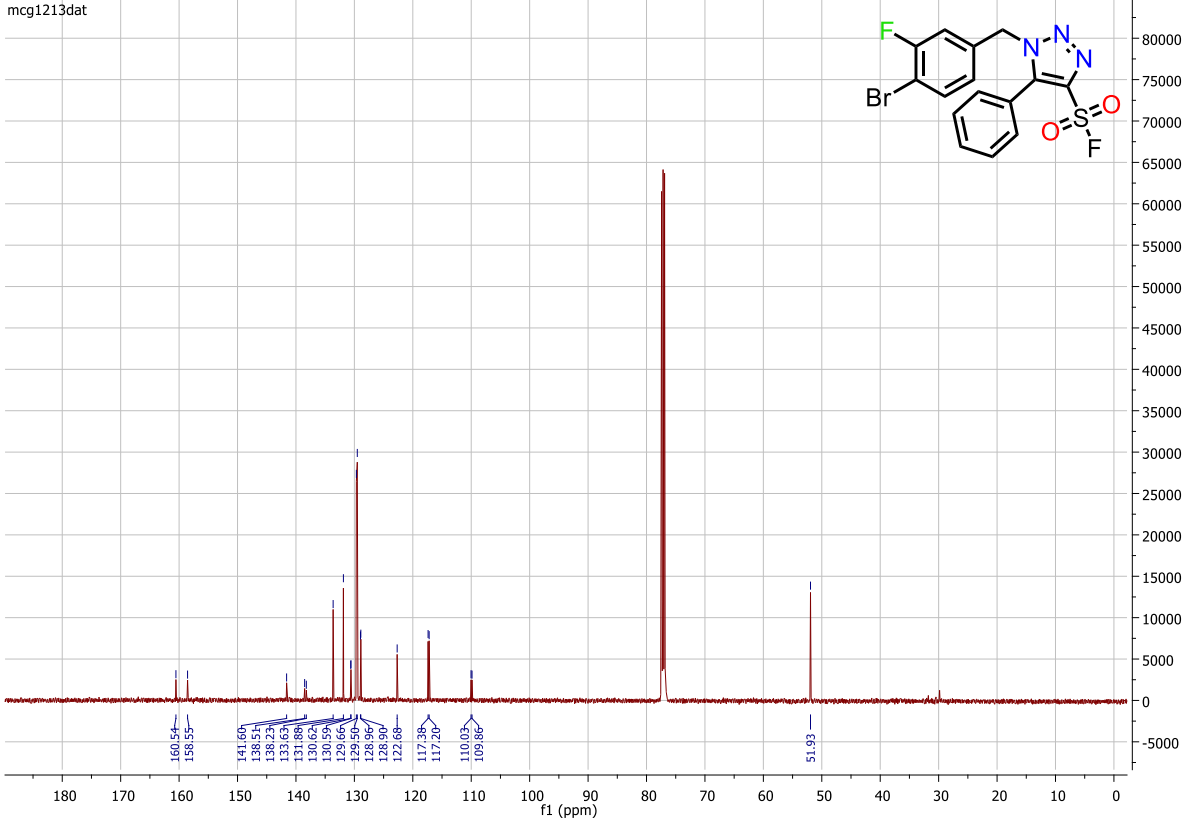

mcg1213-F

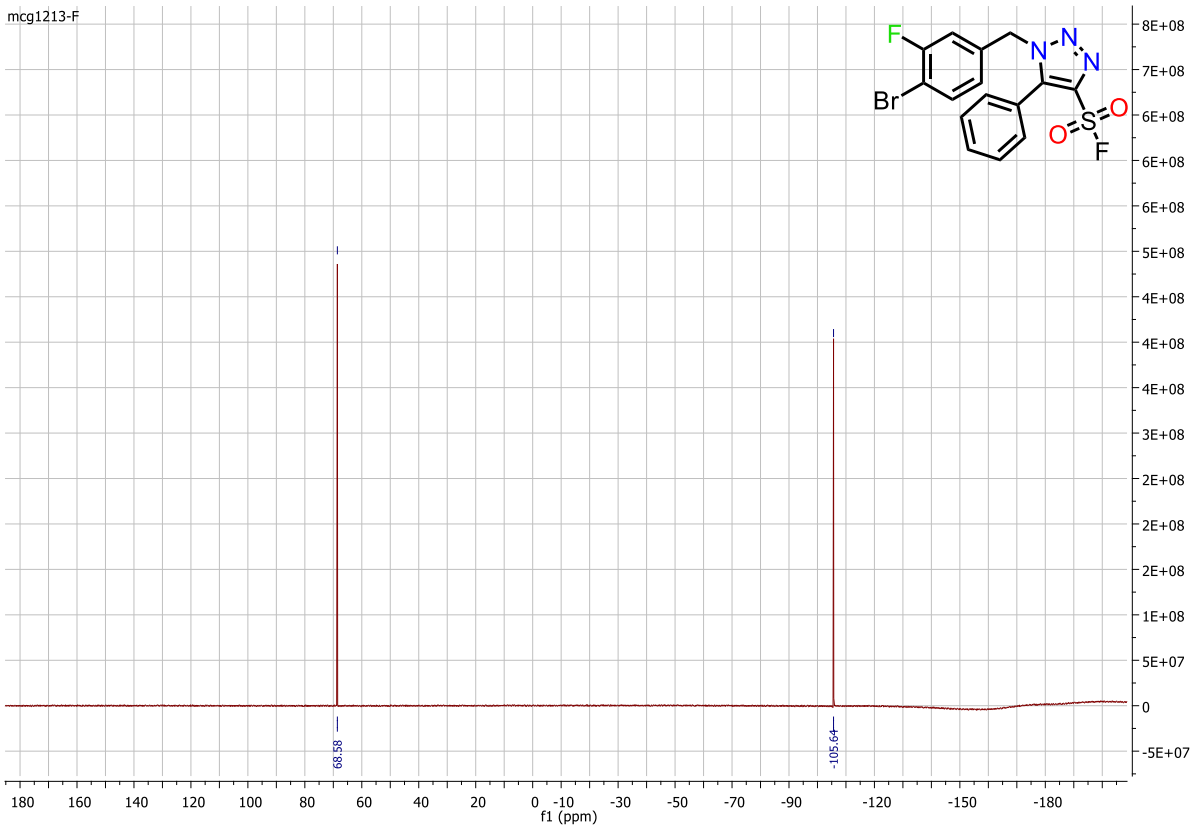

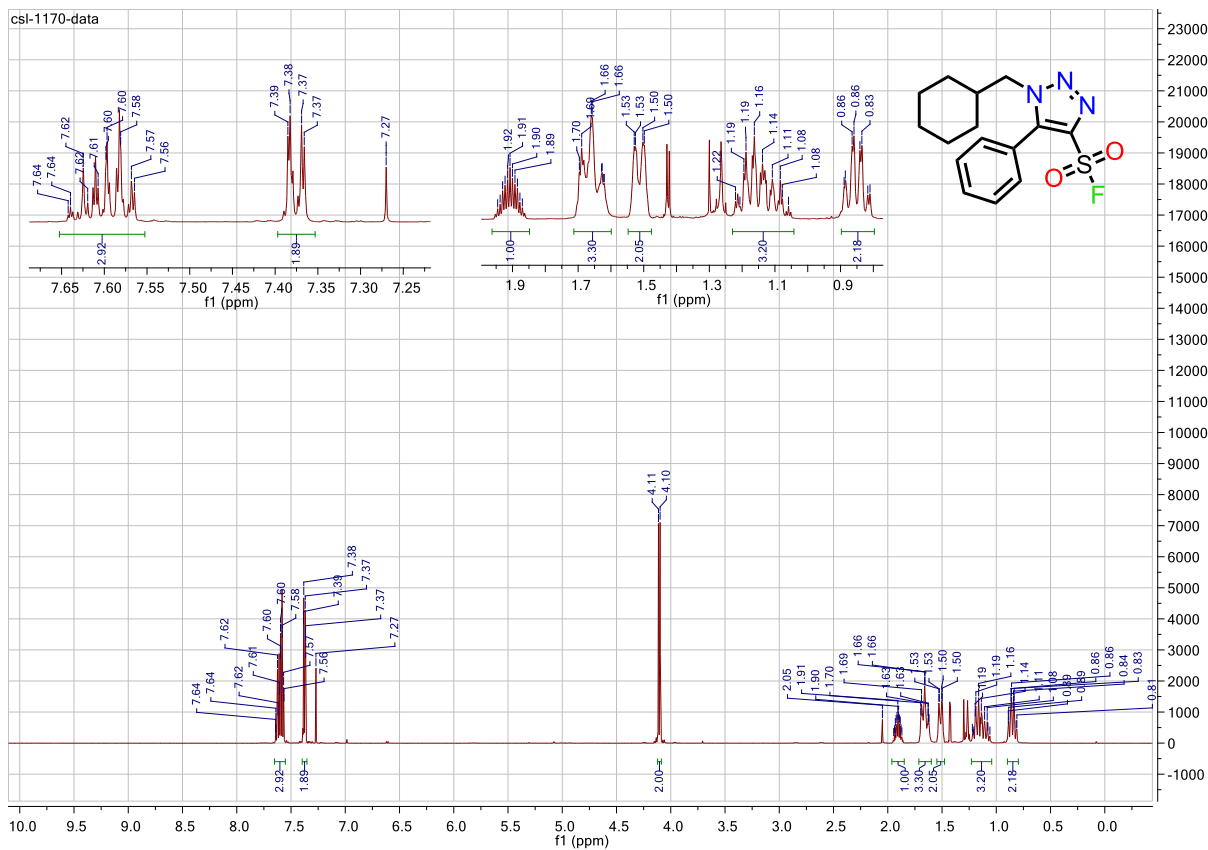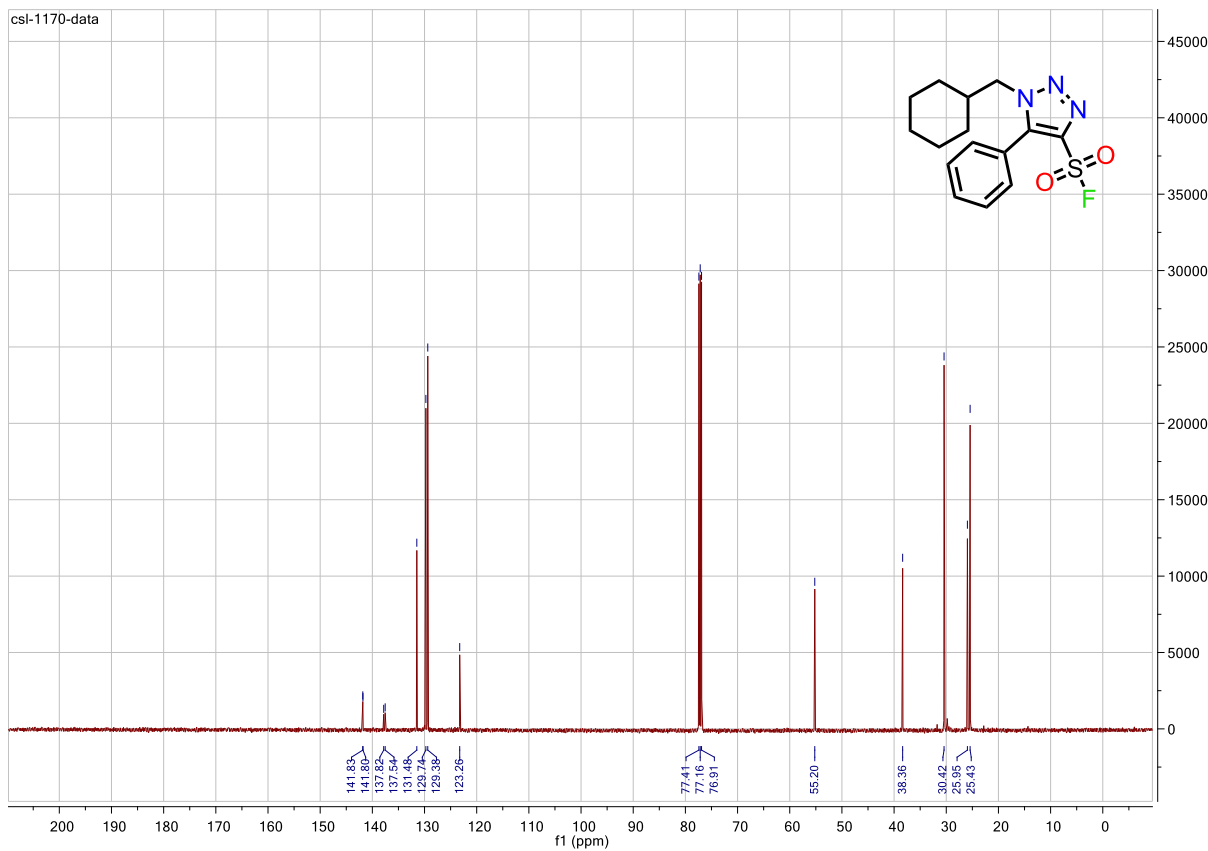

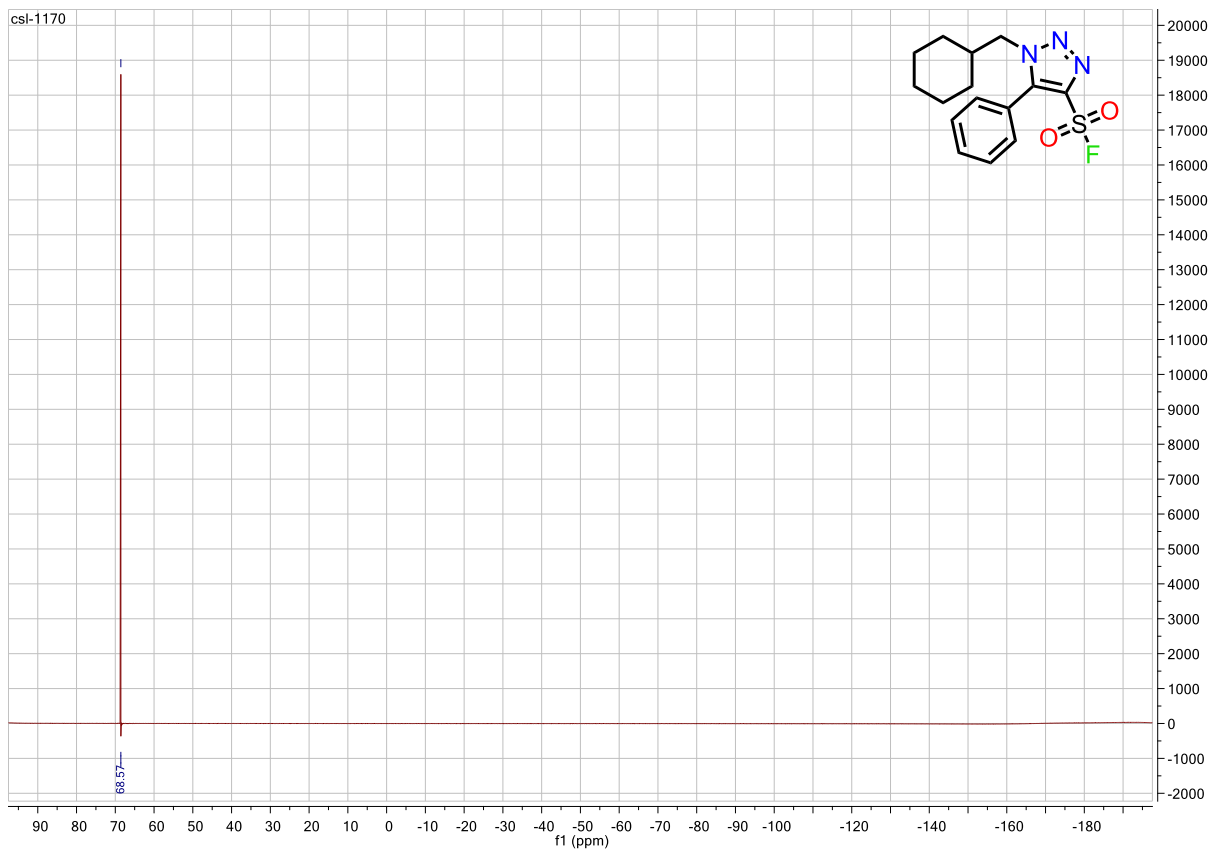

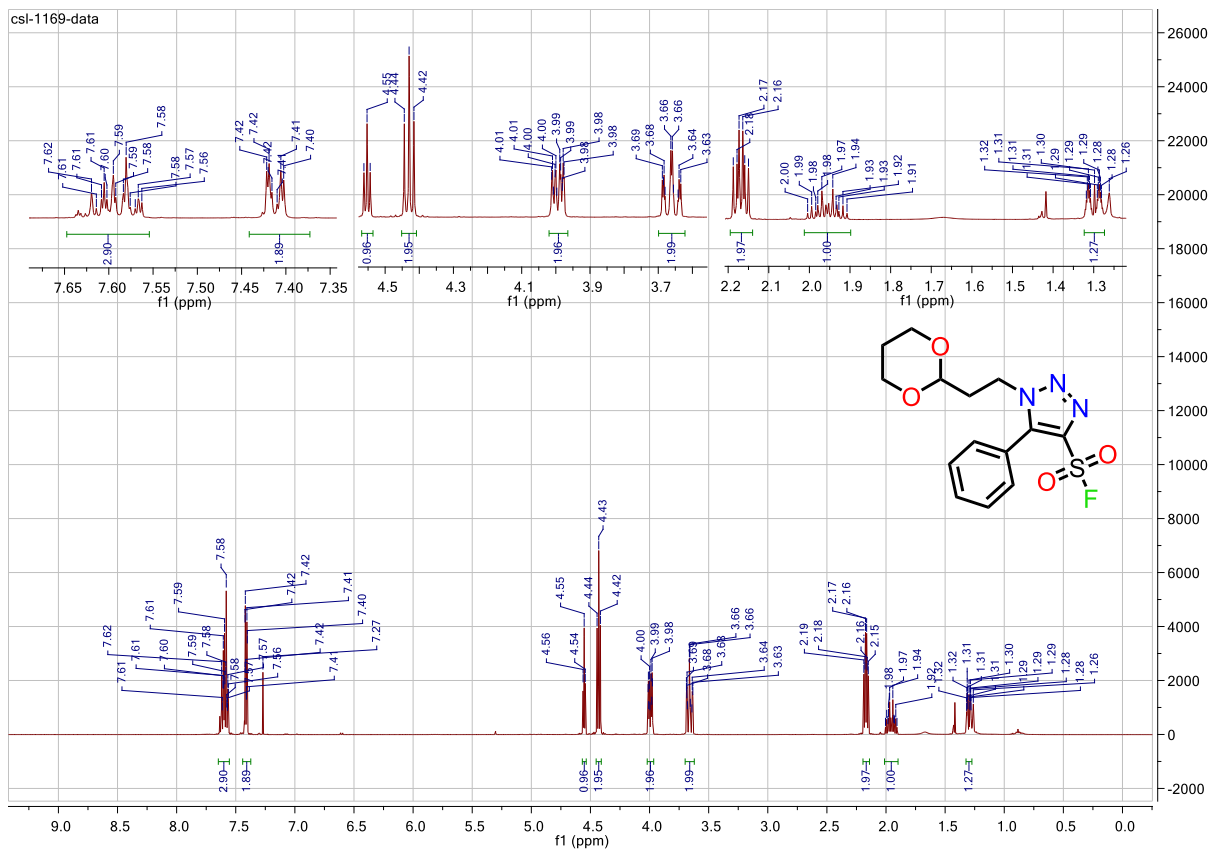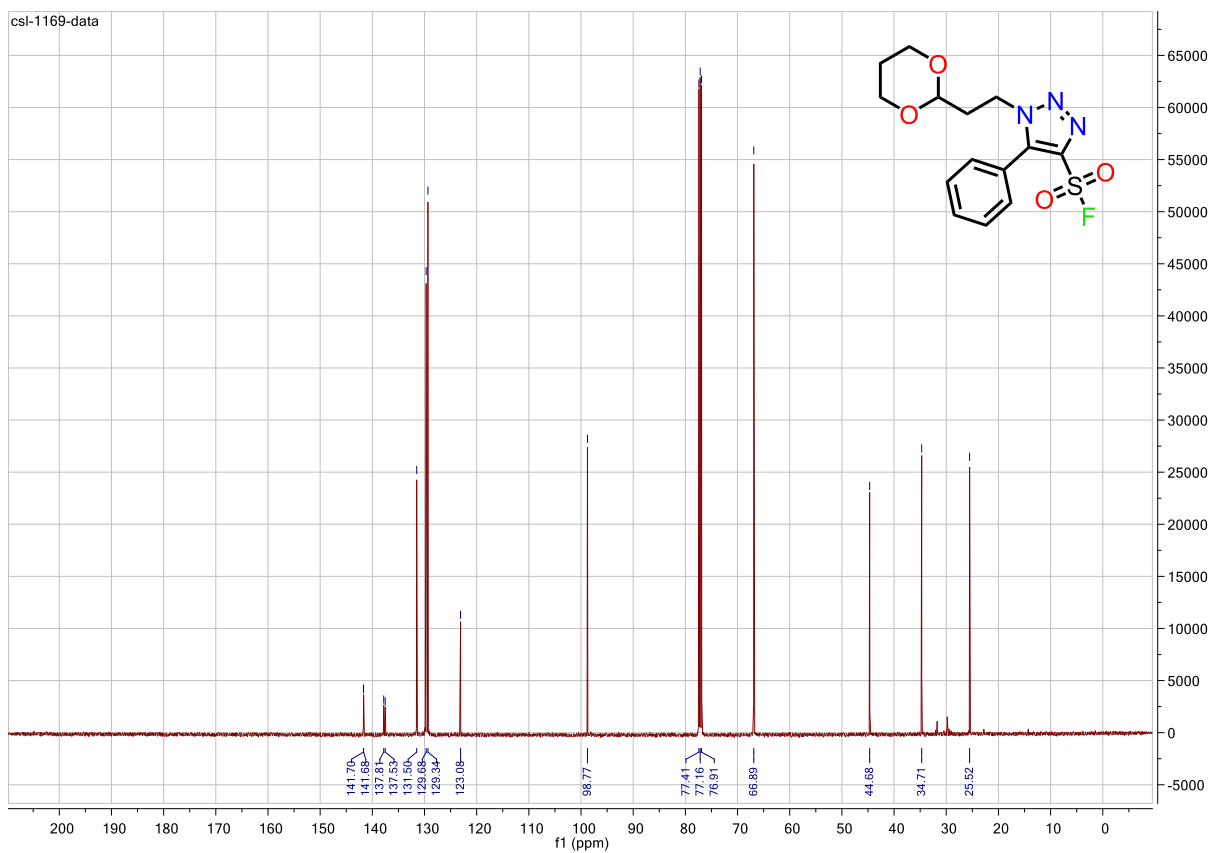

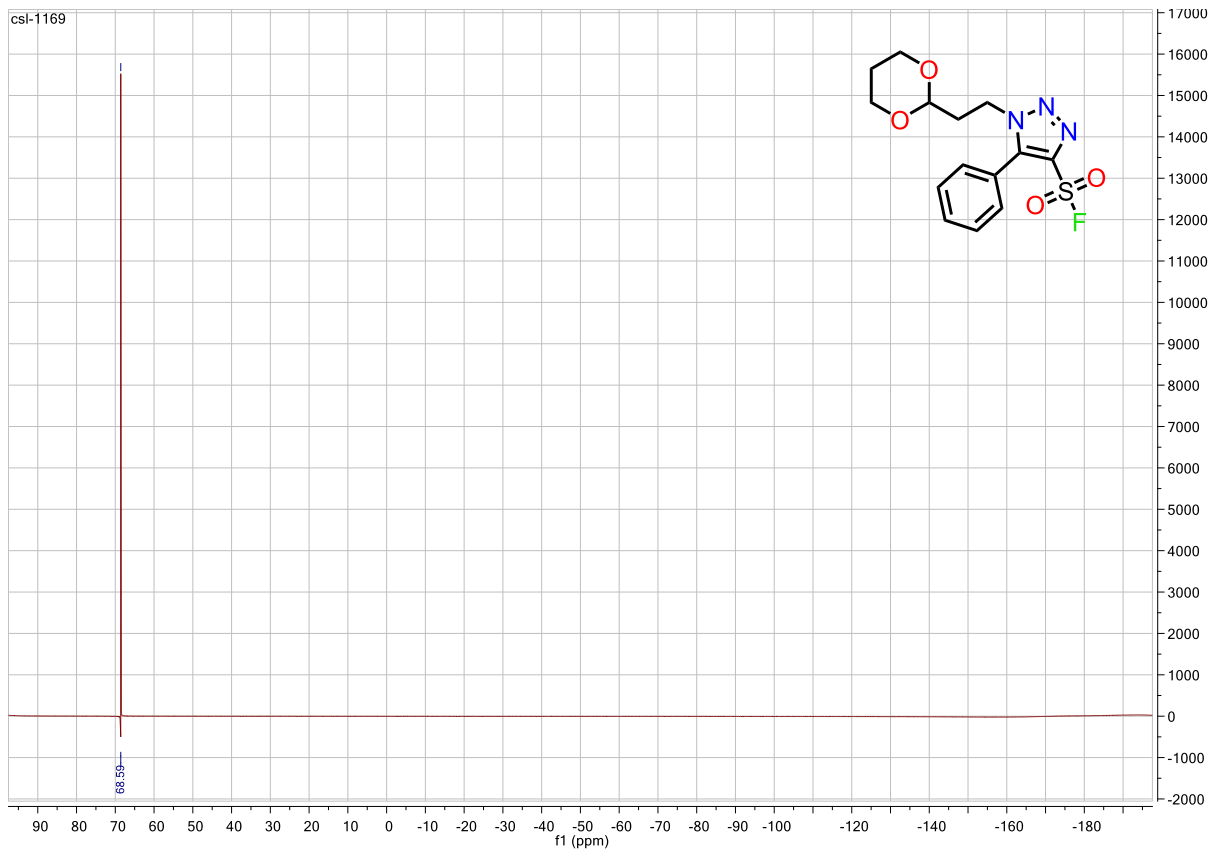



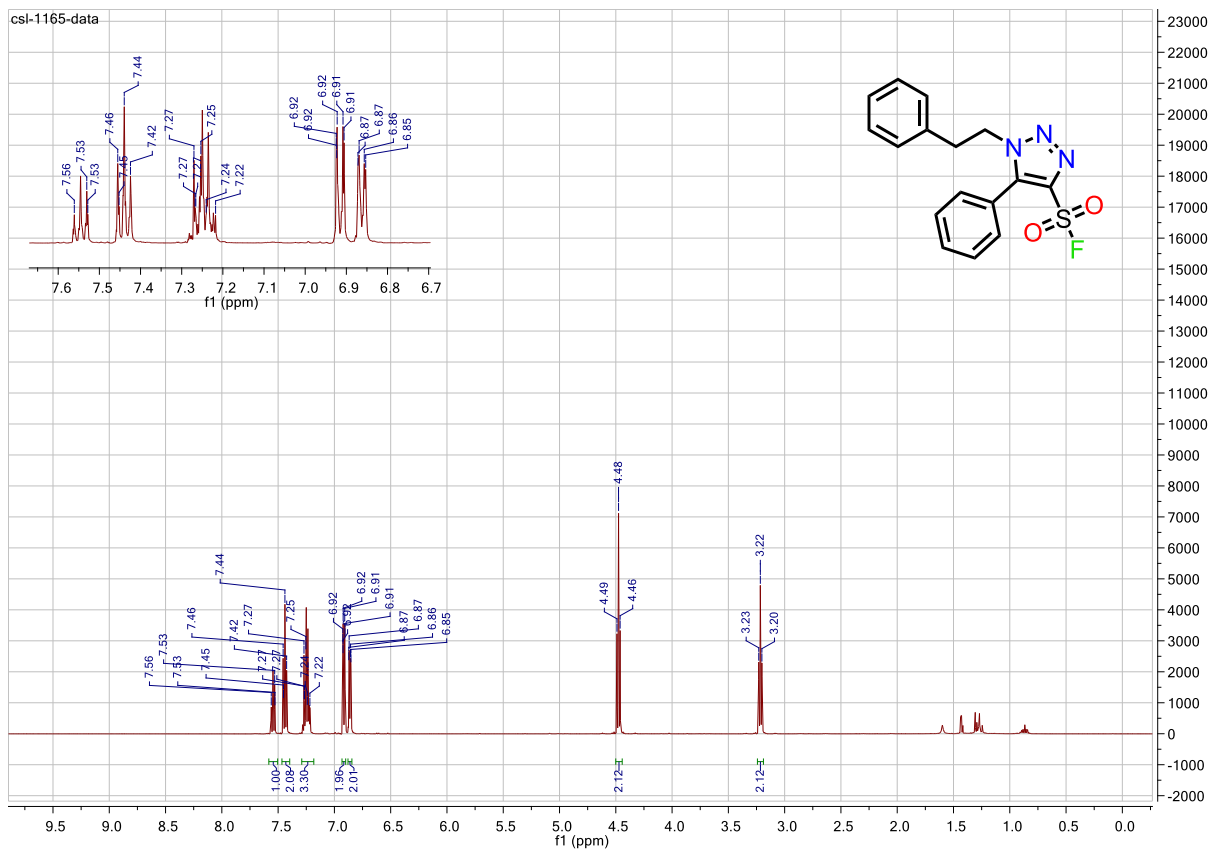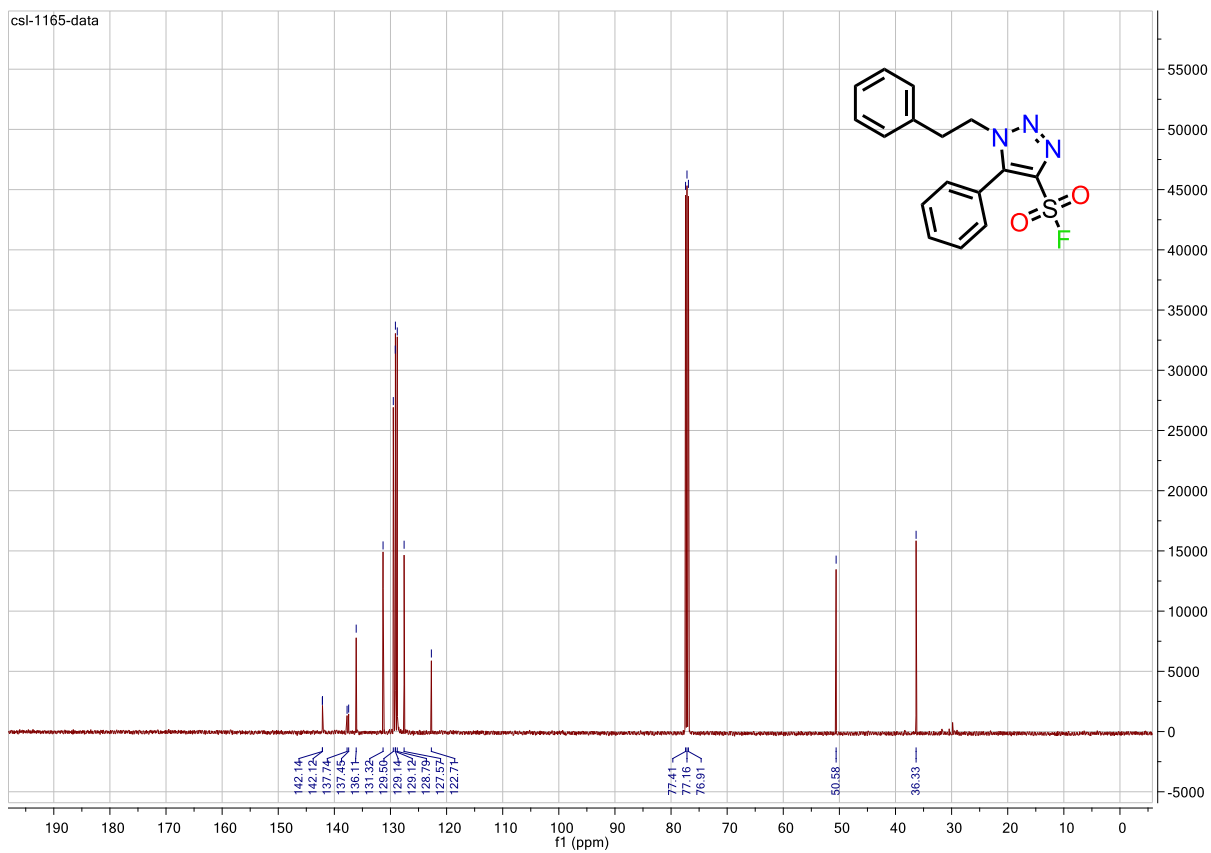

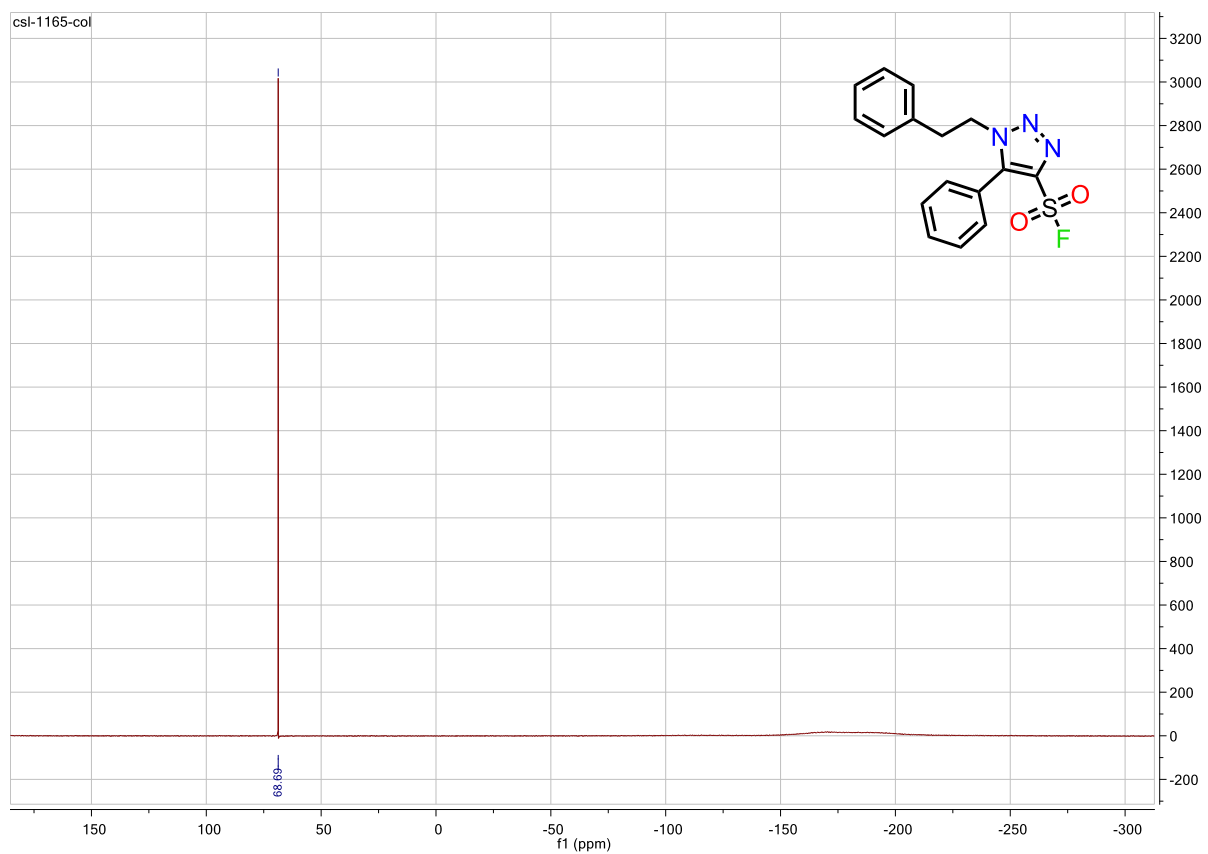

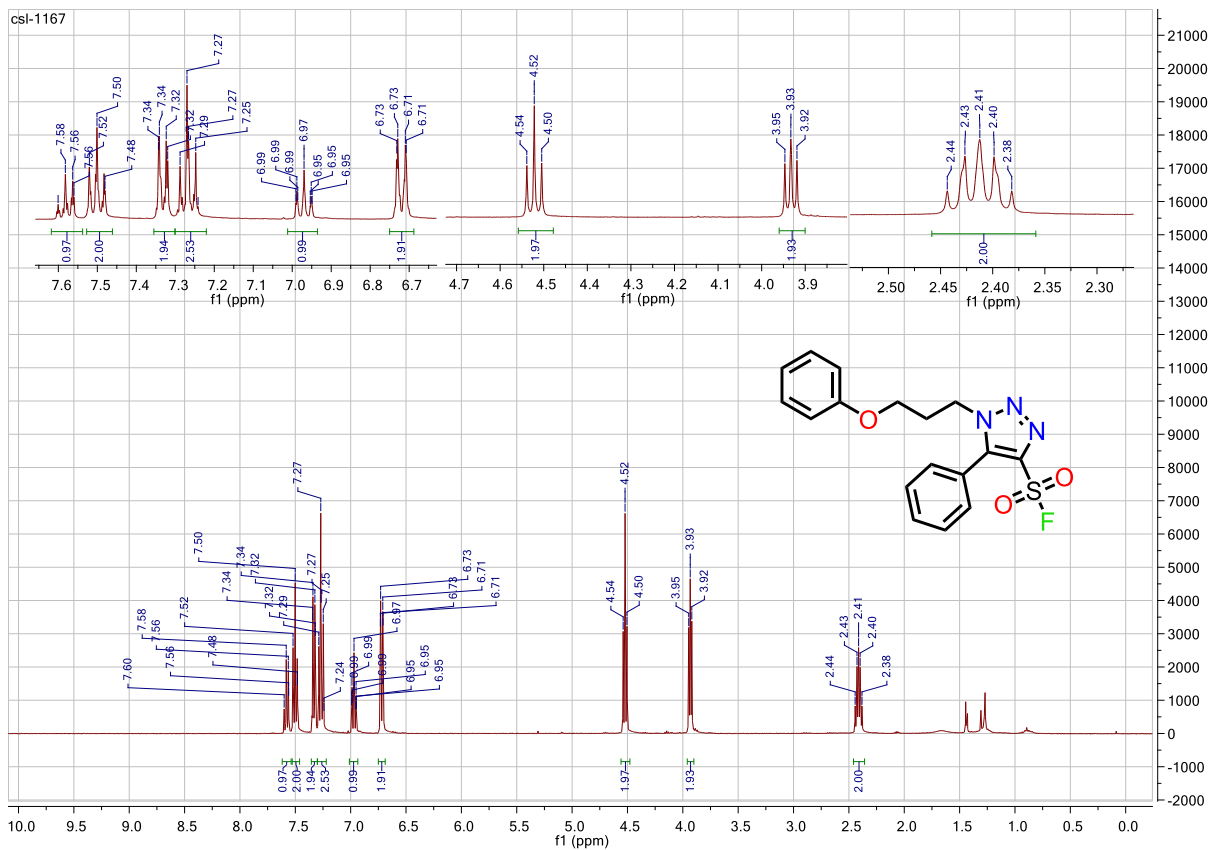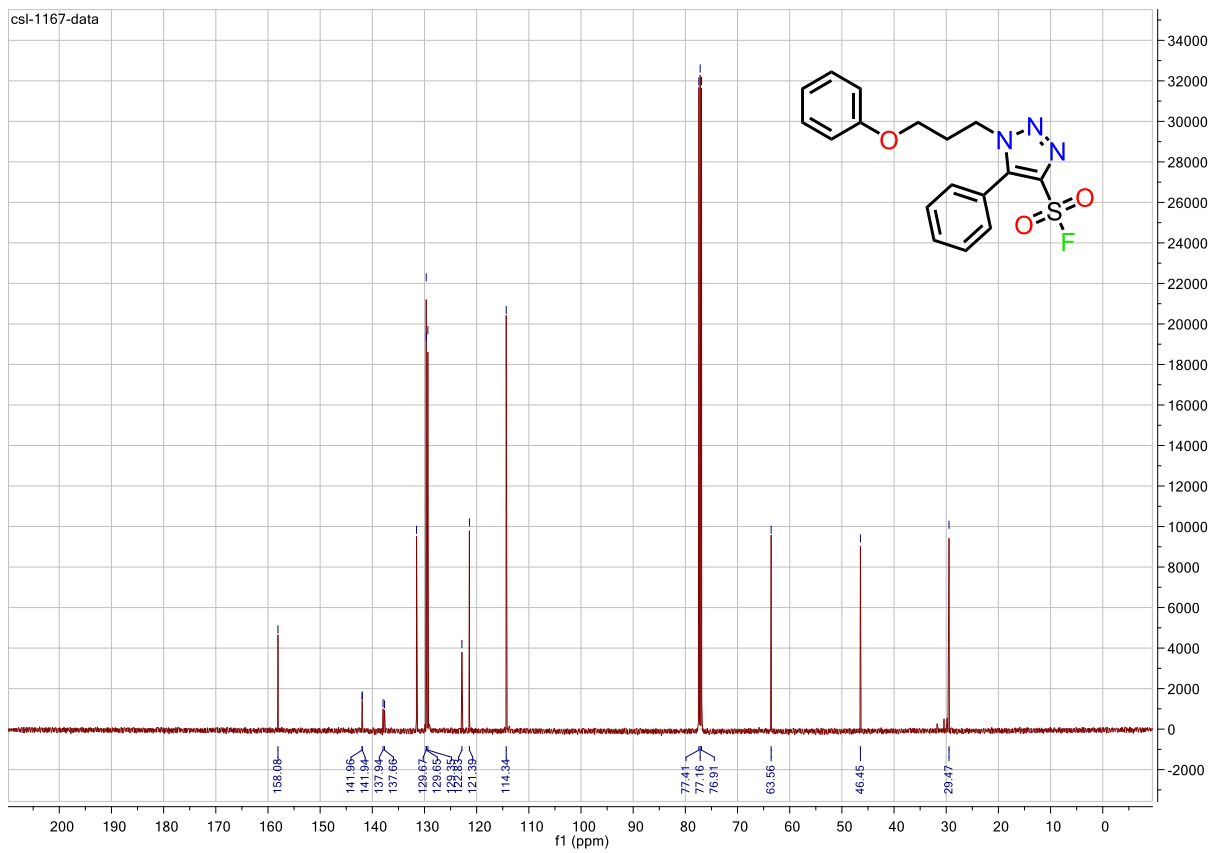

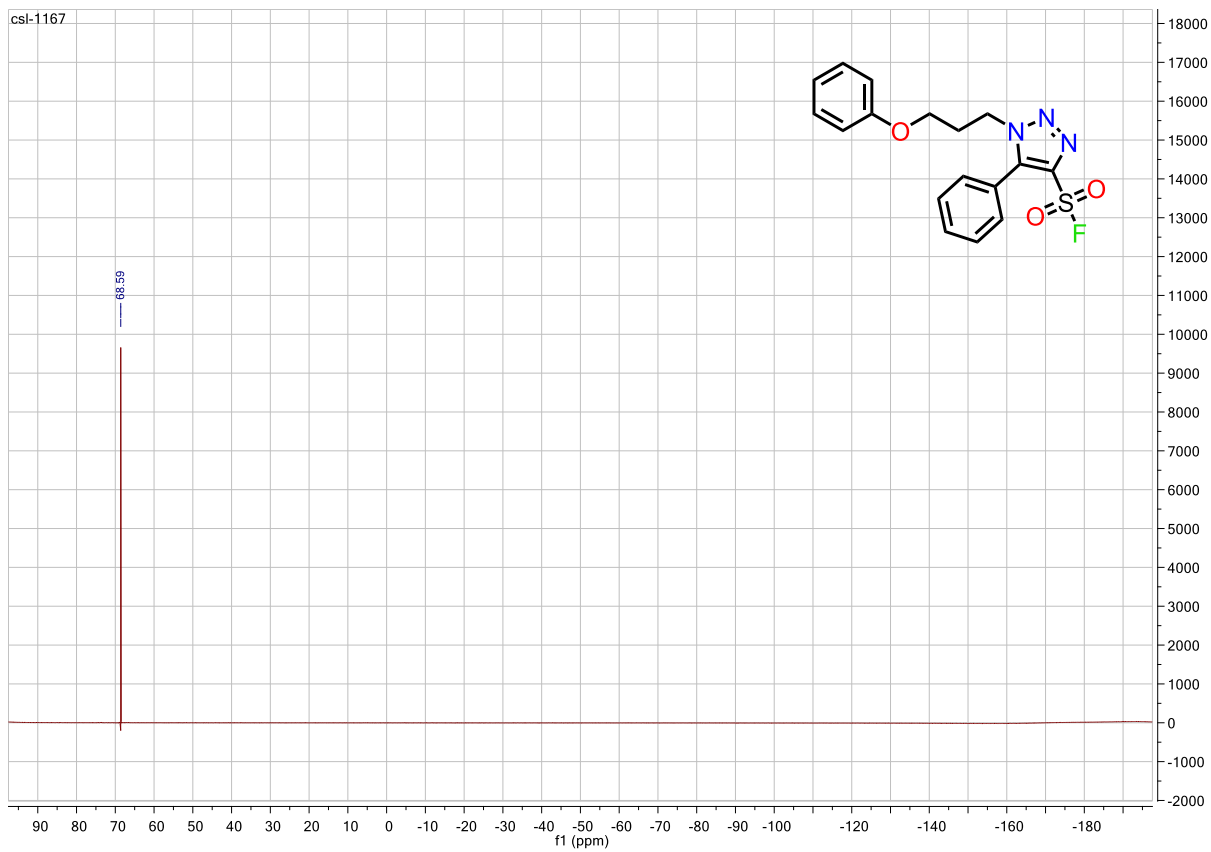

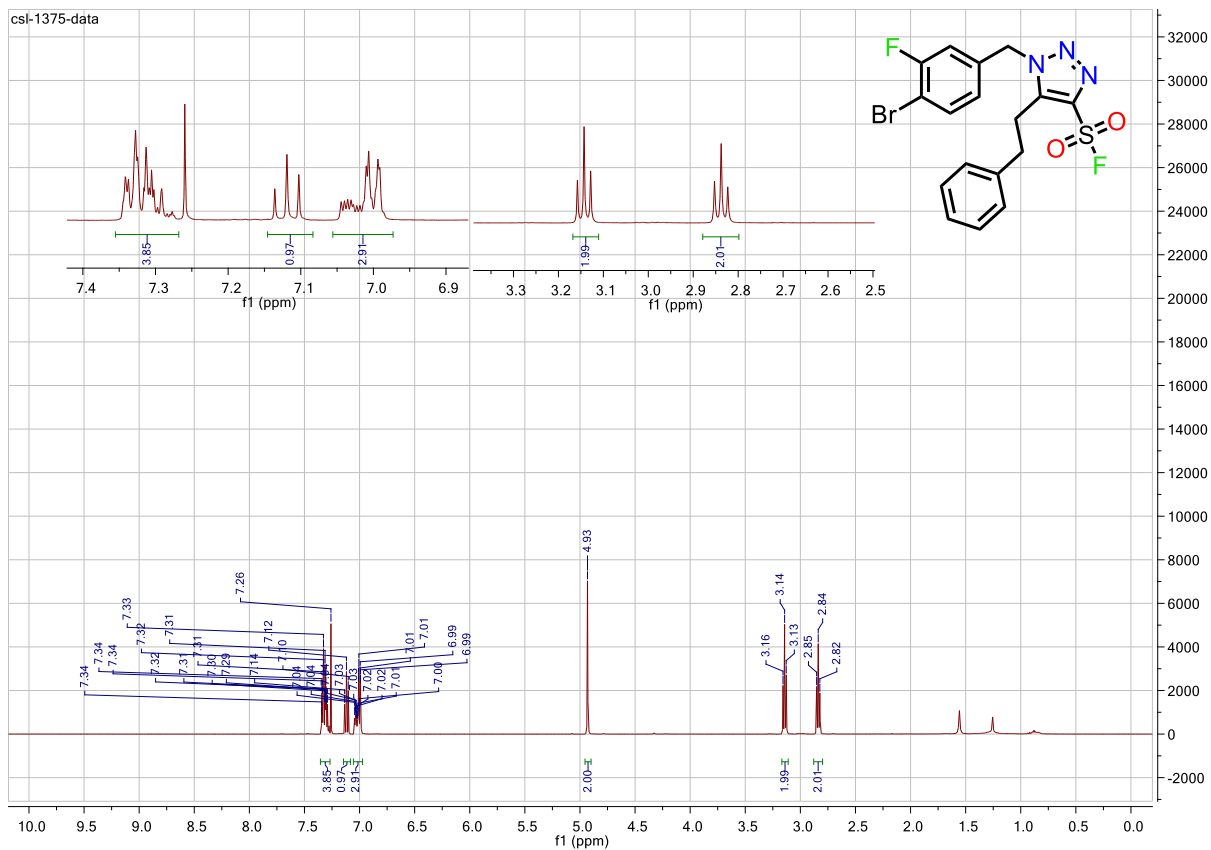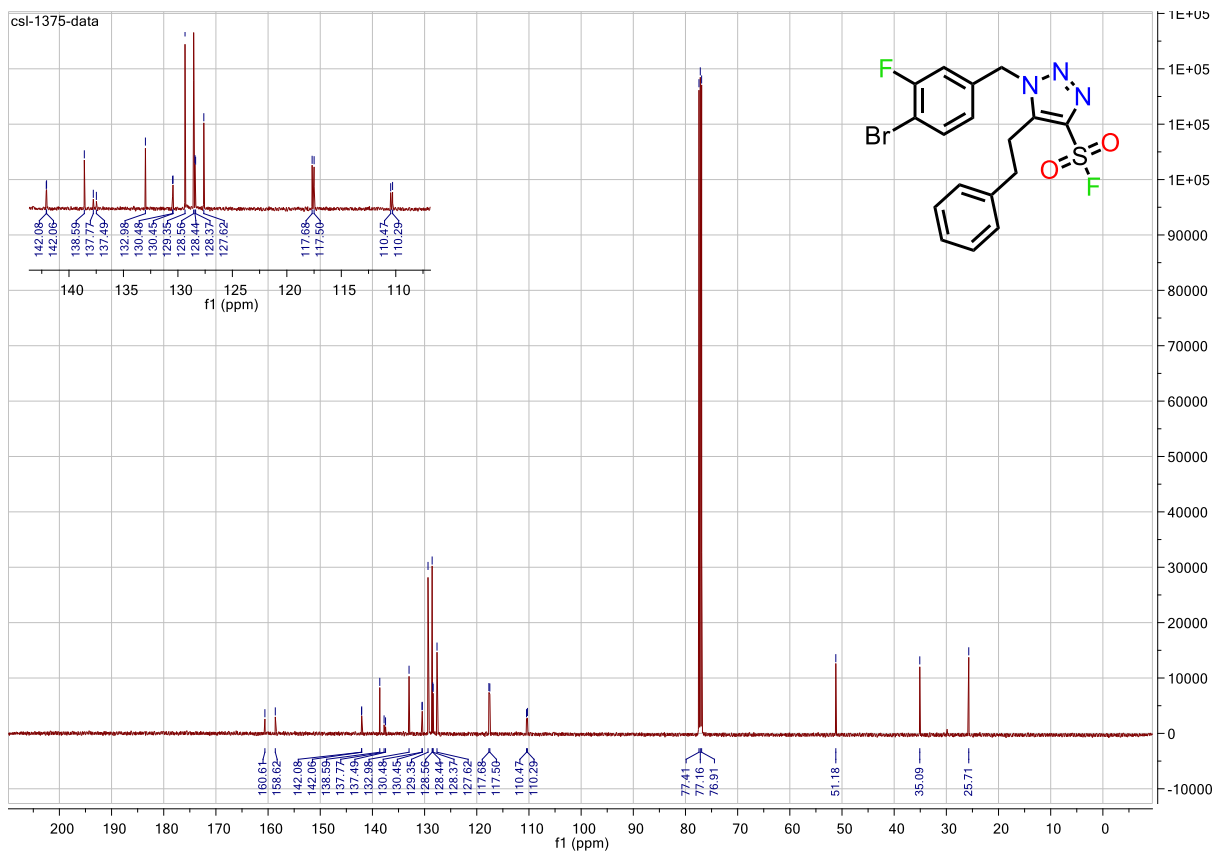

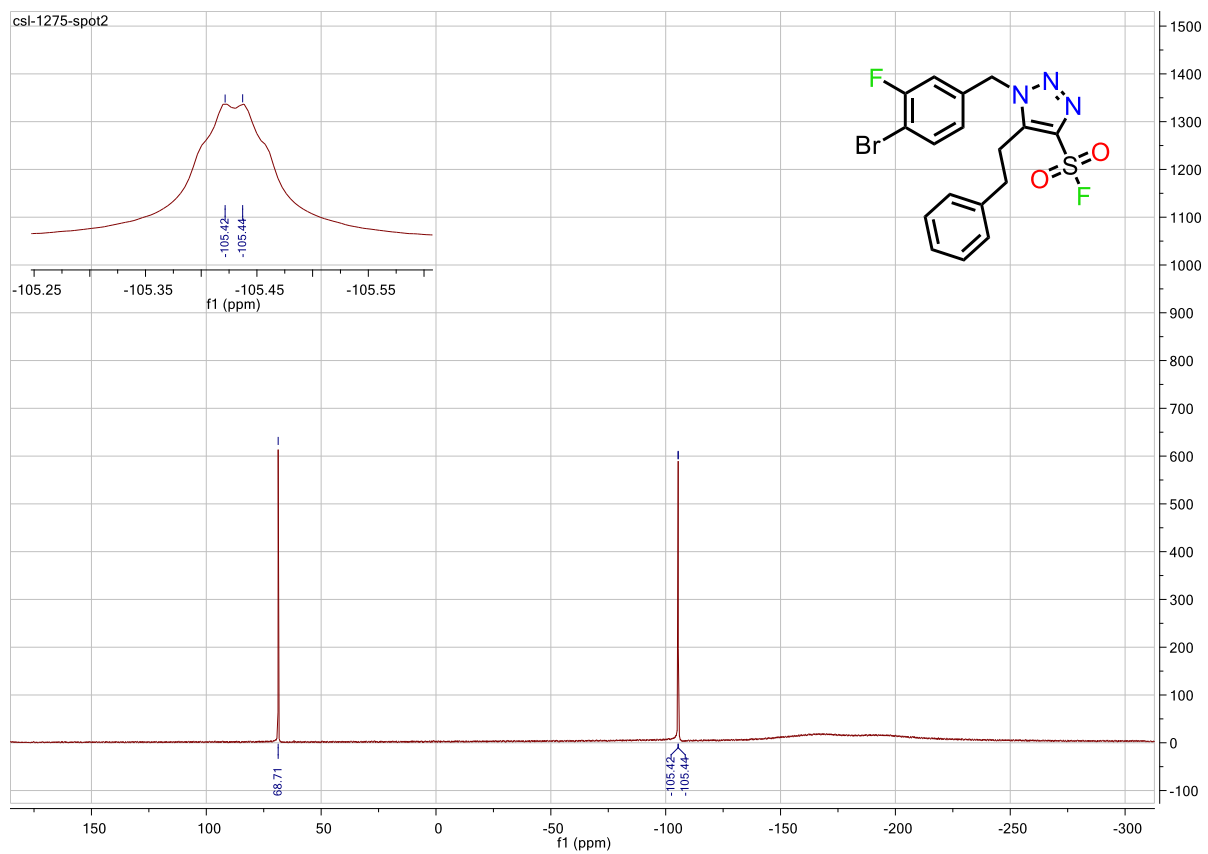

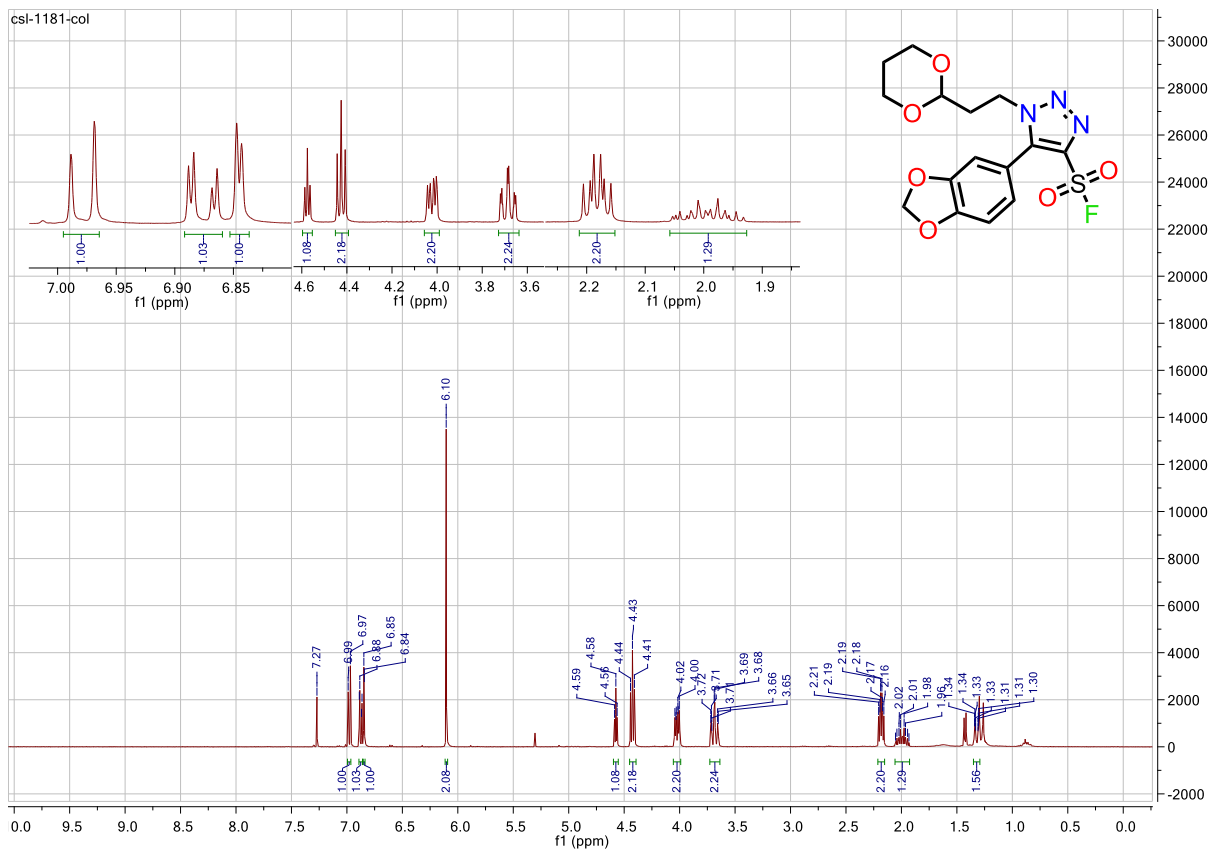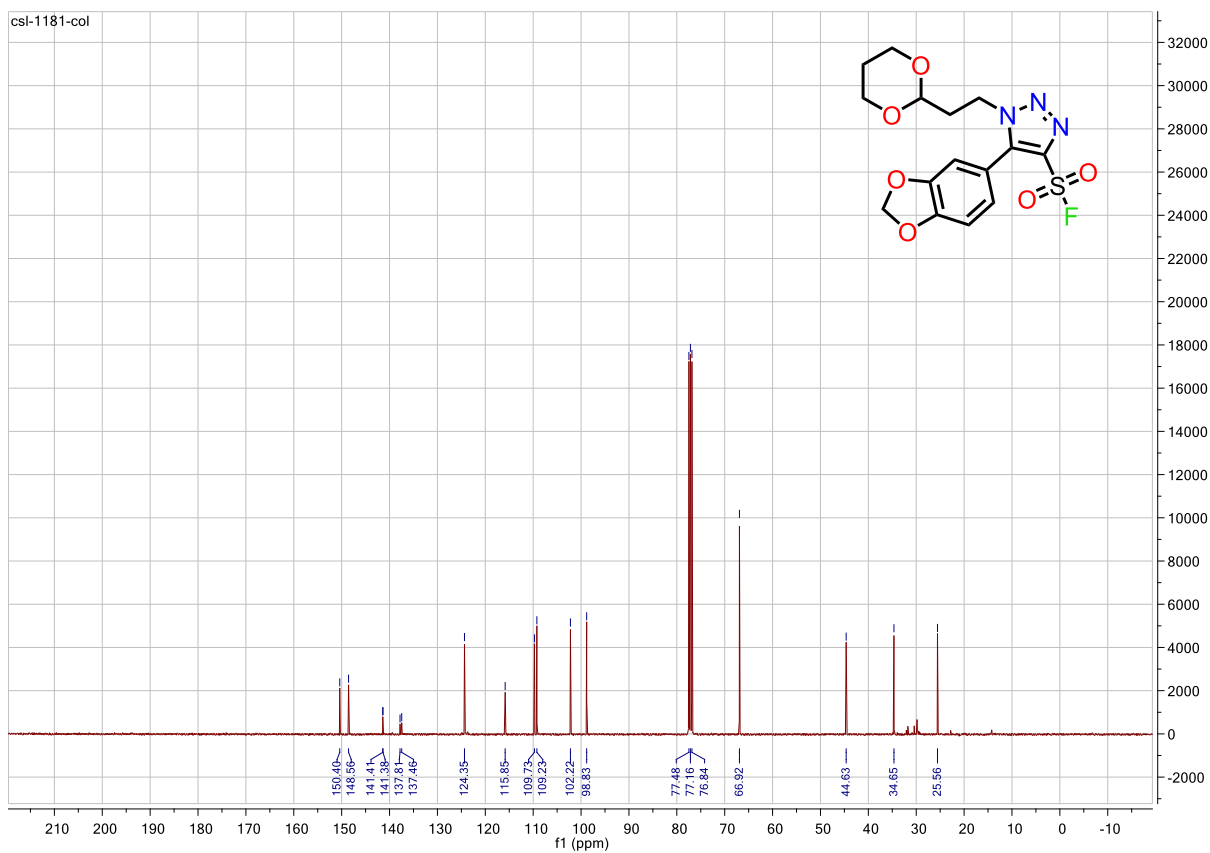

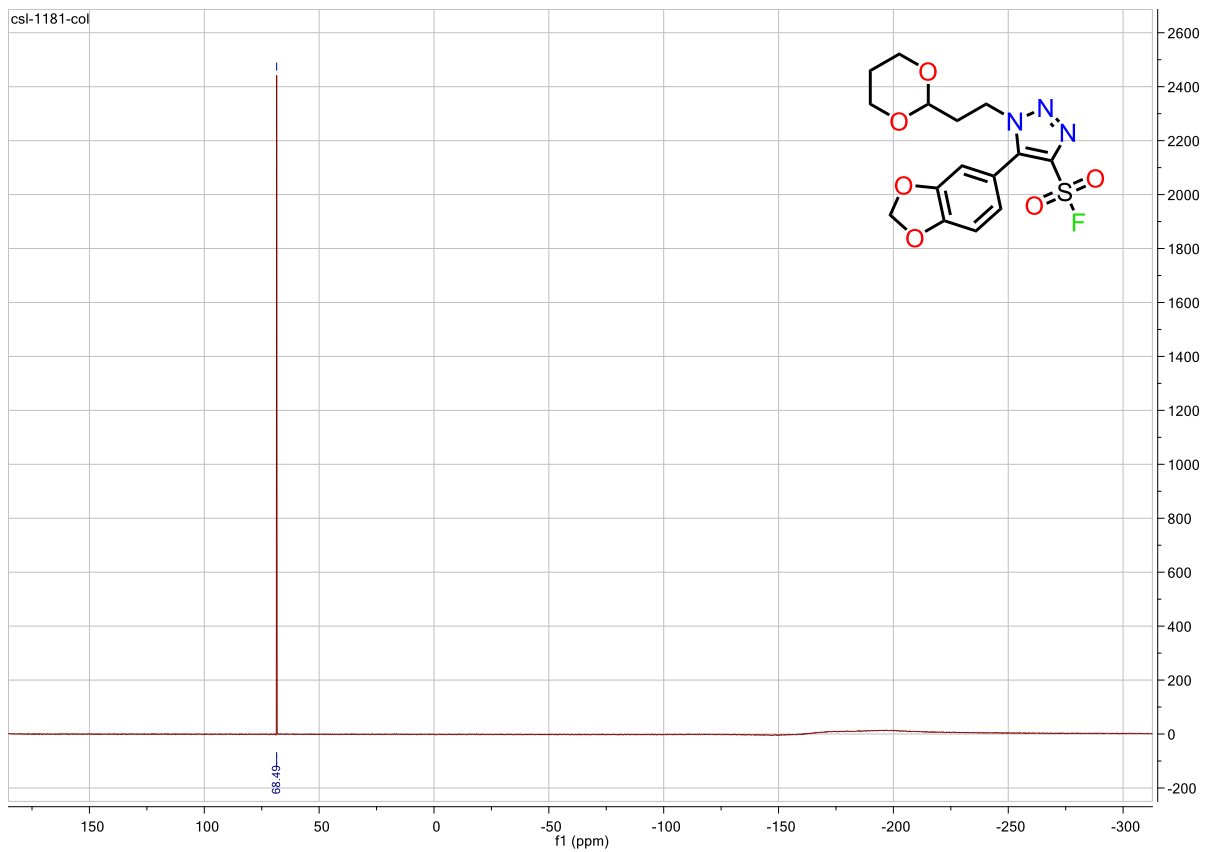



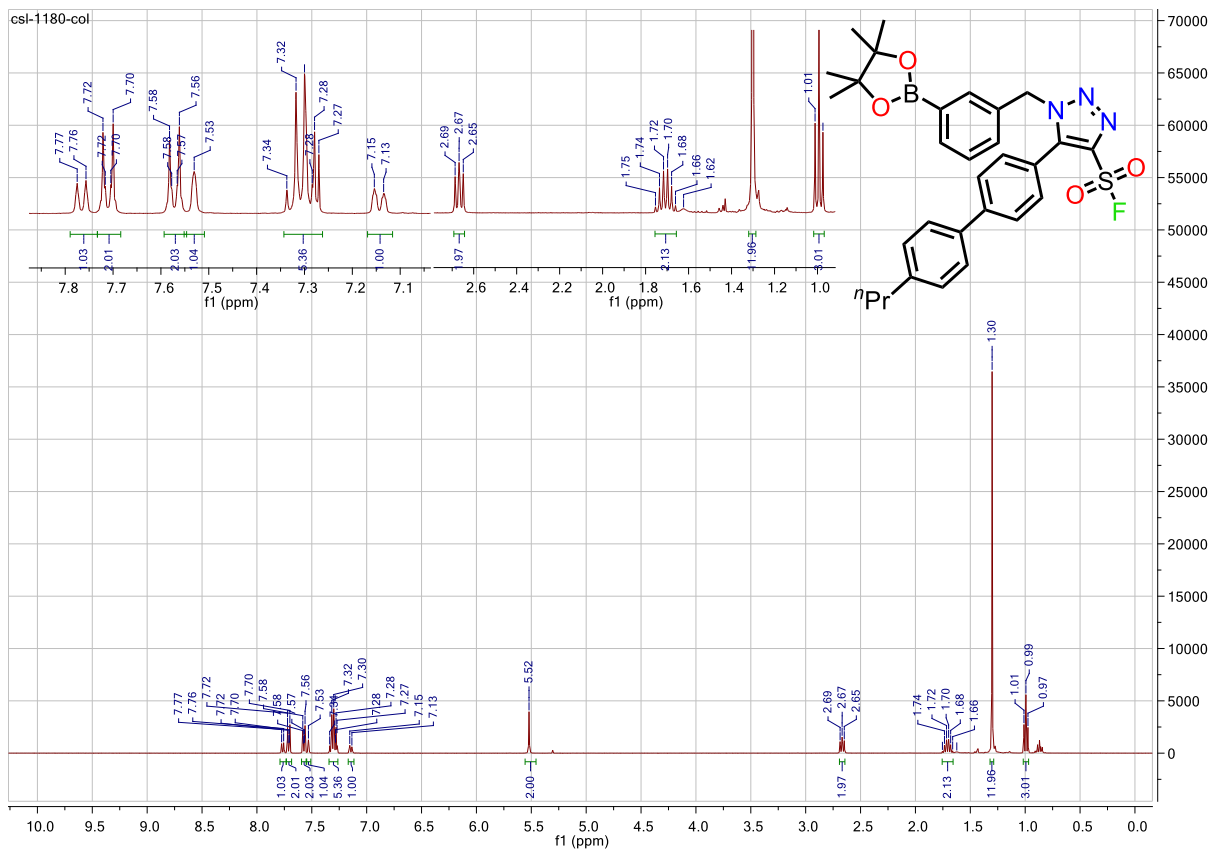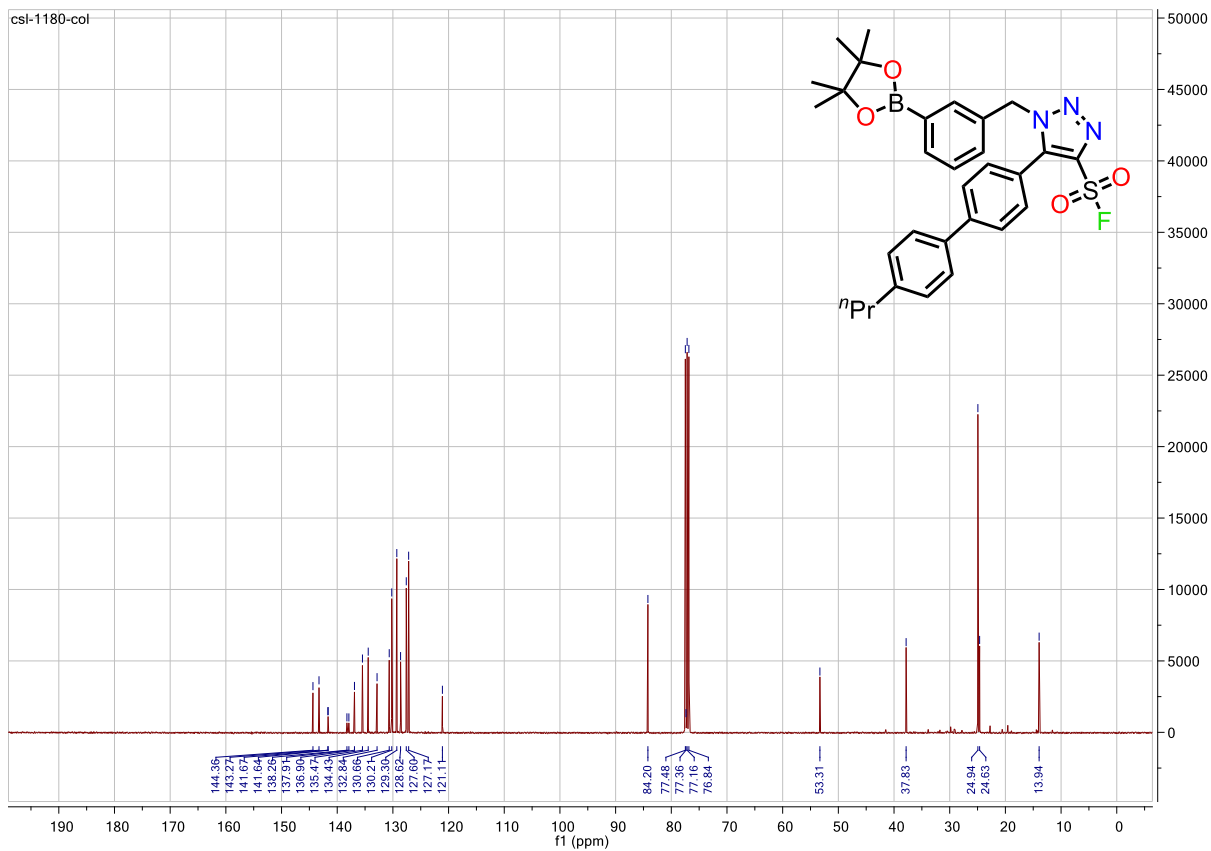

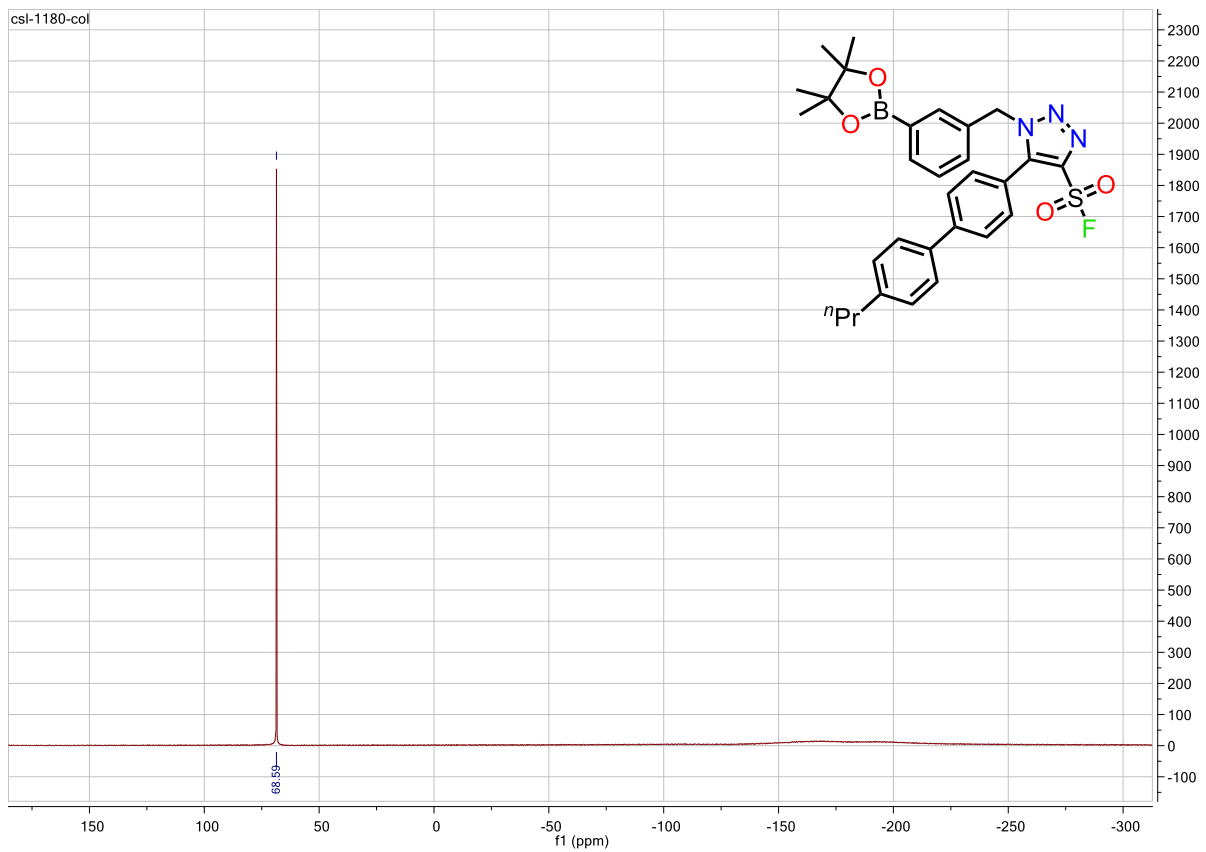

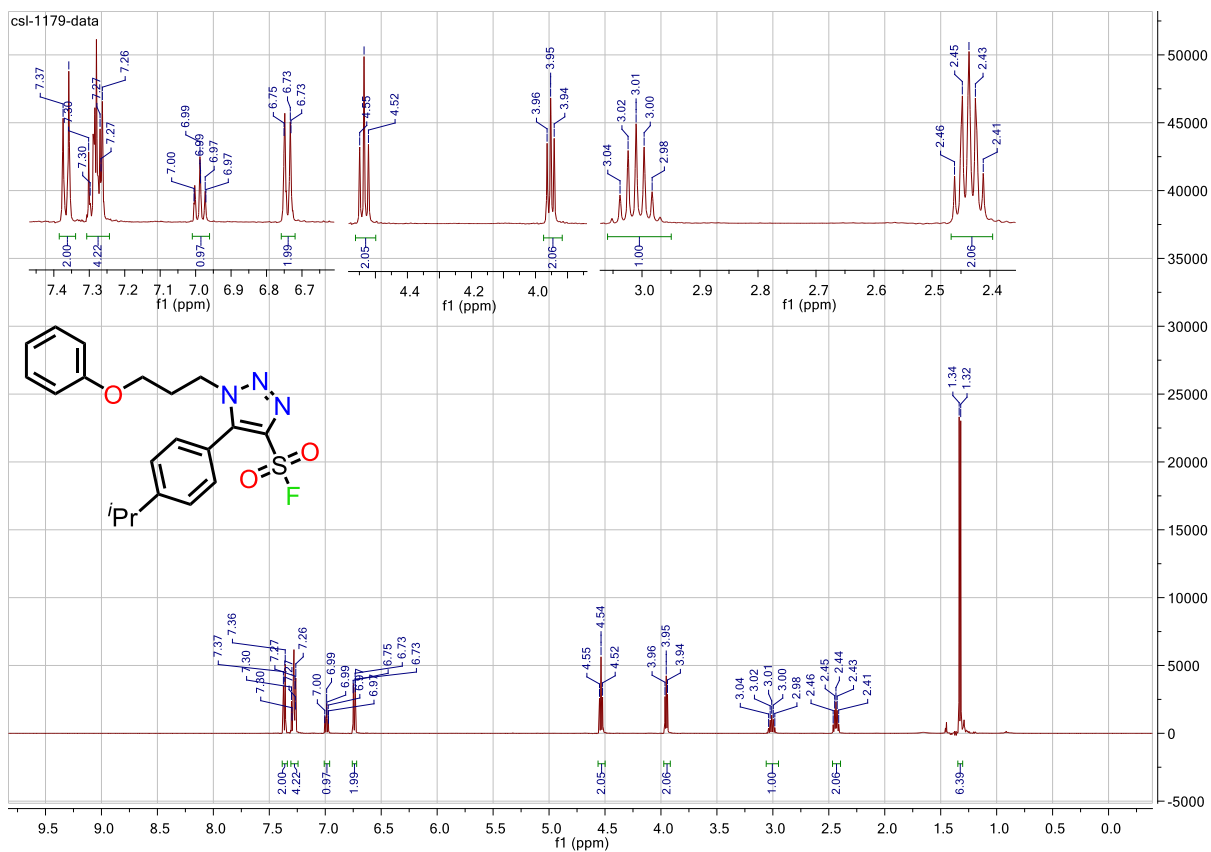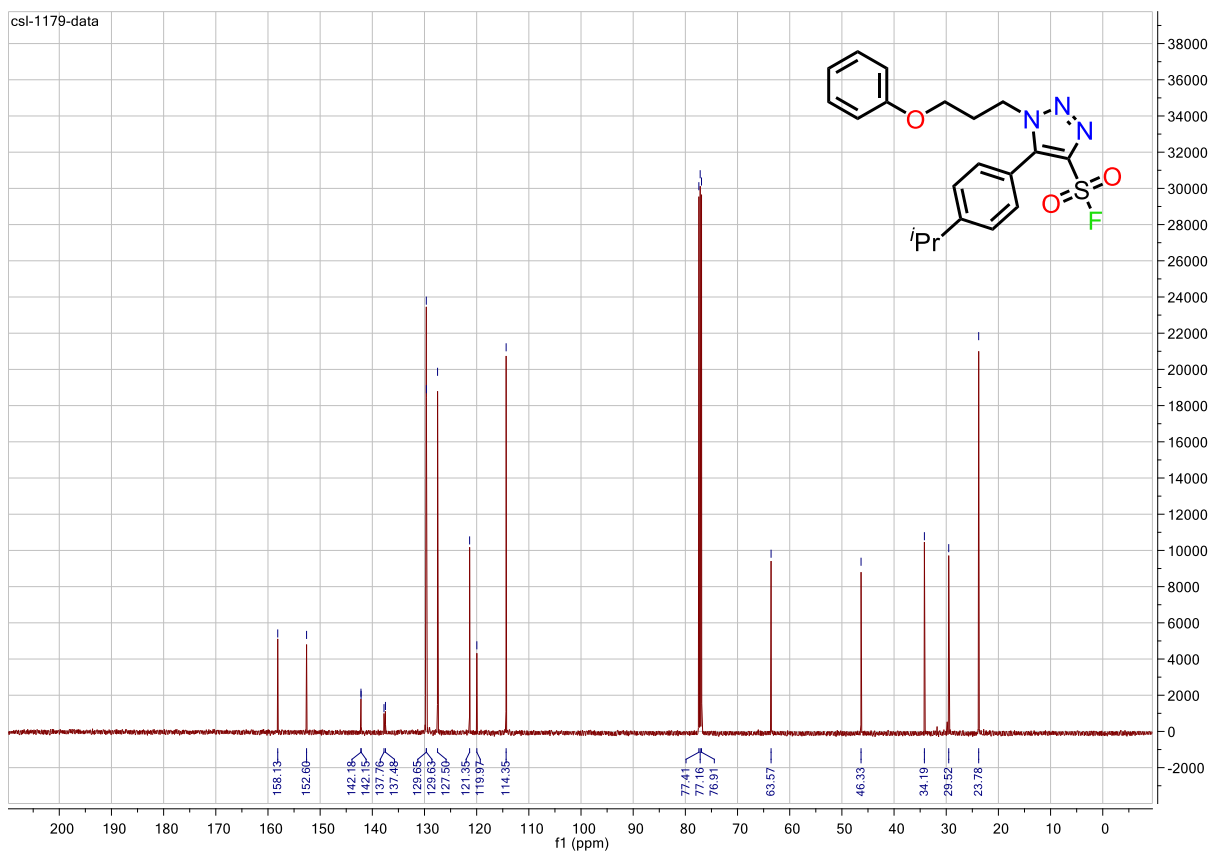

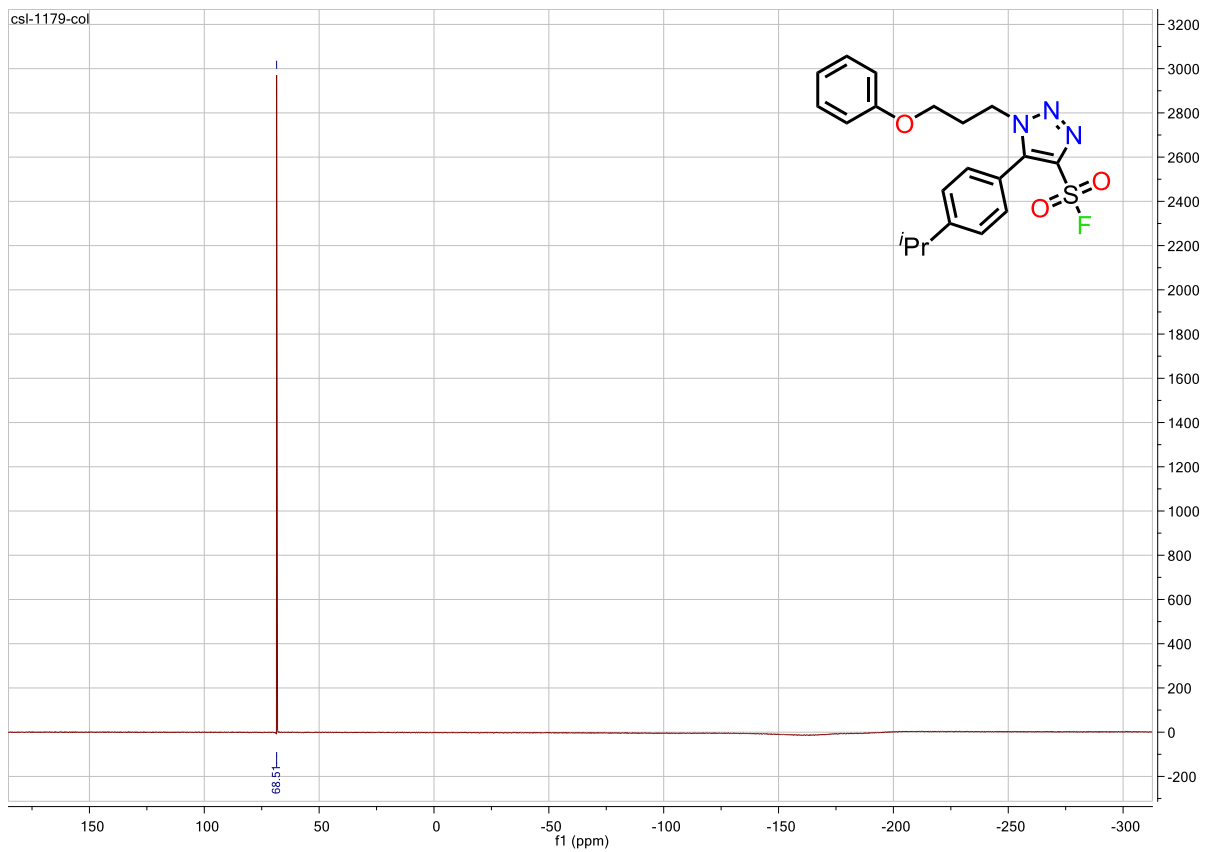

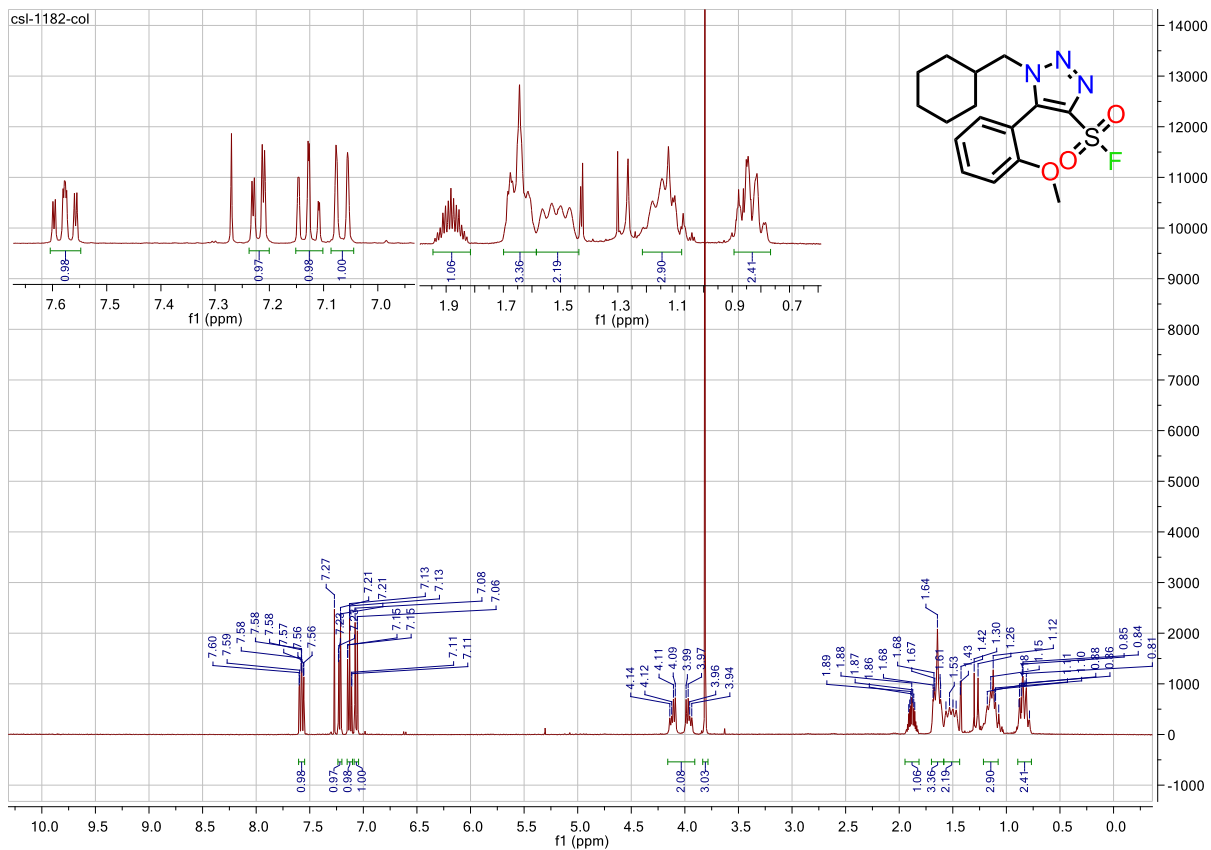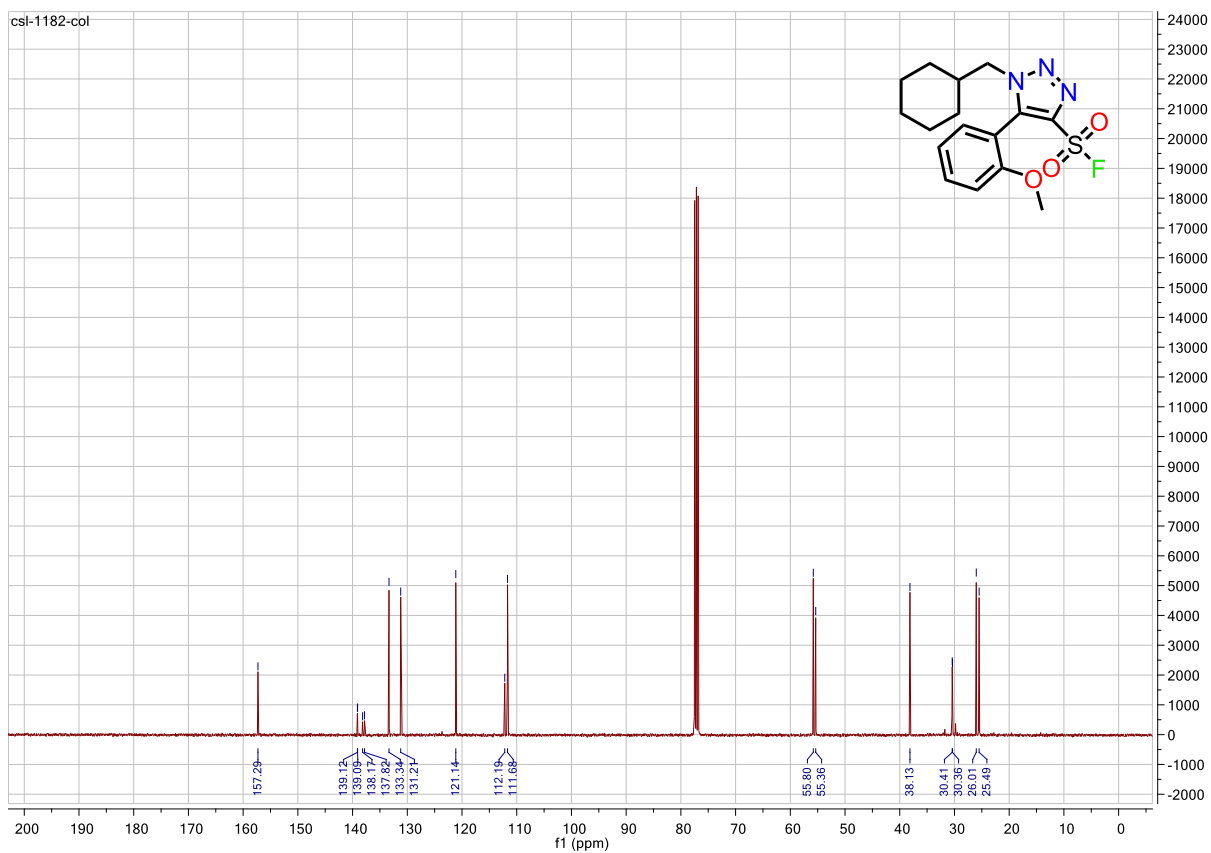

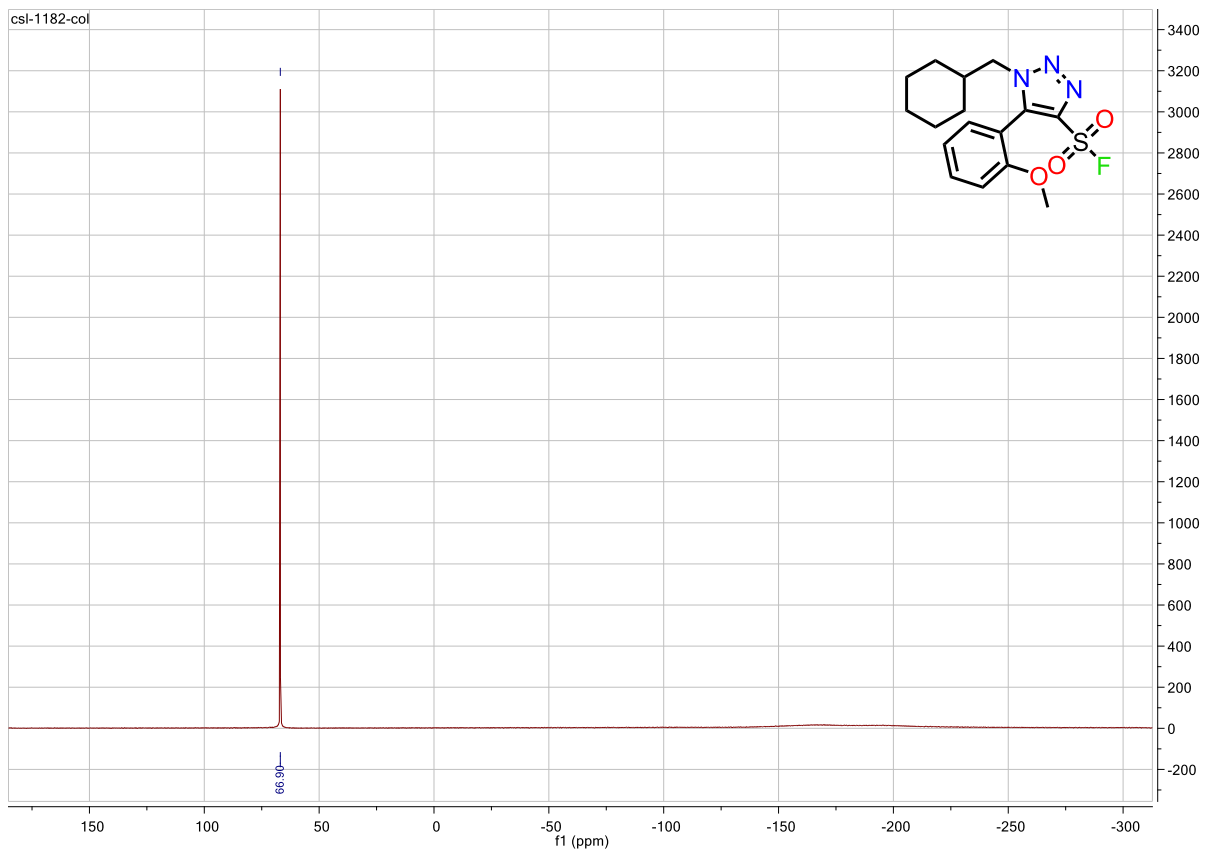

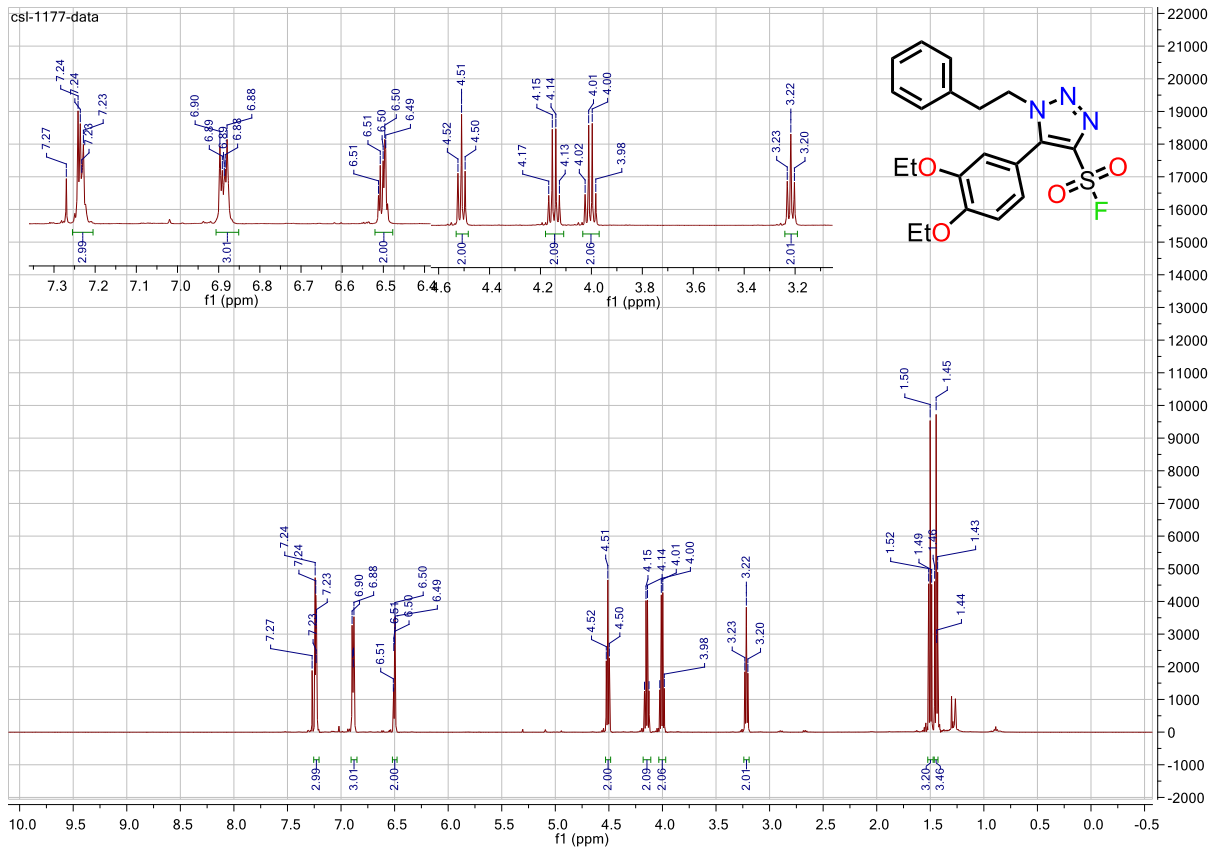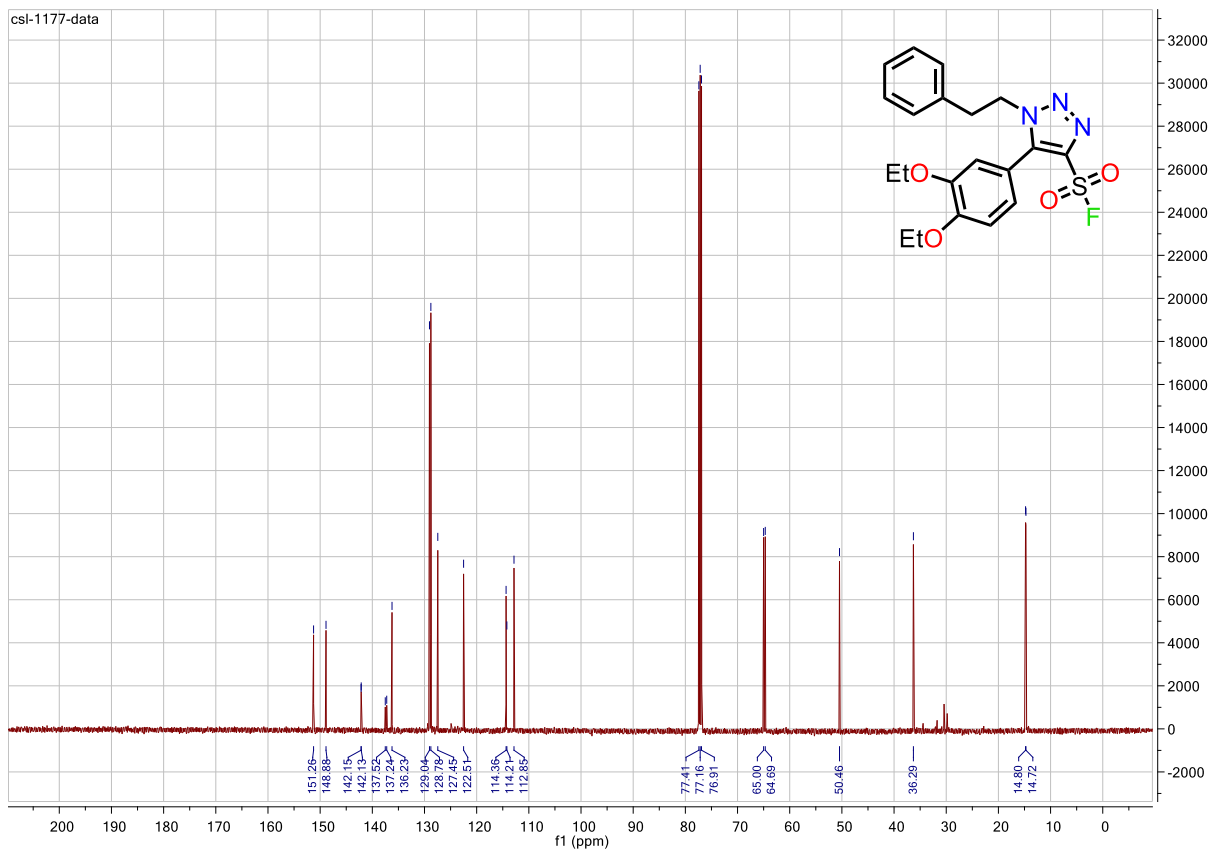

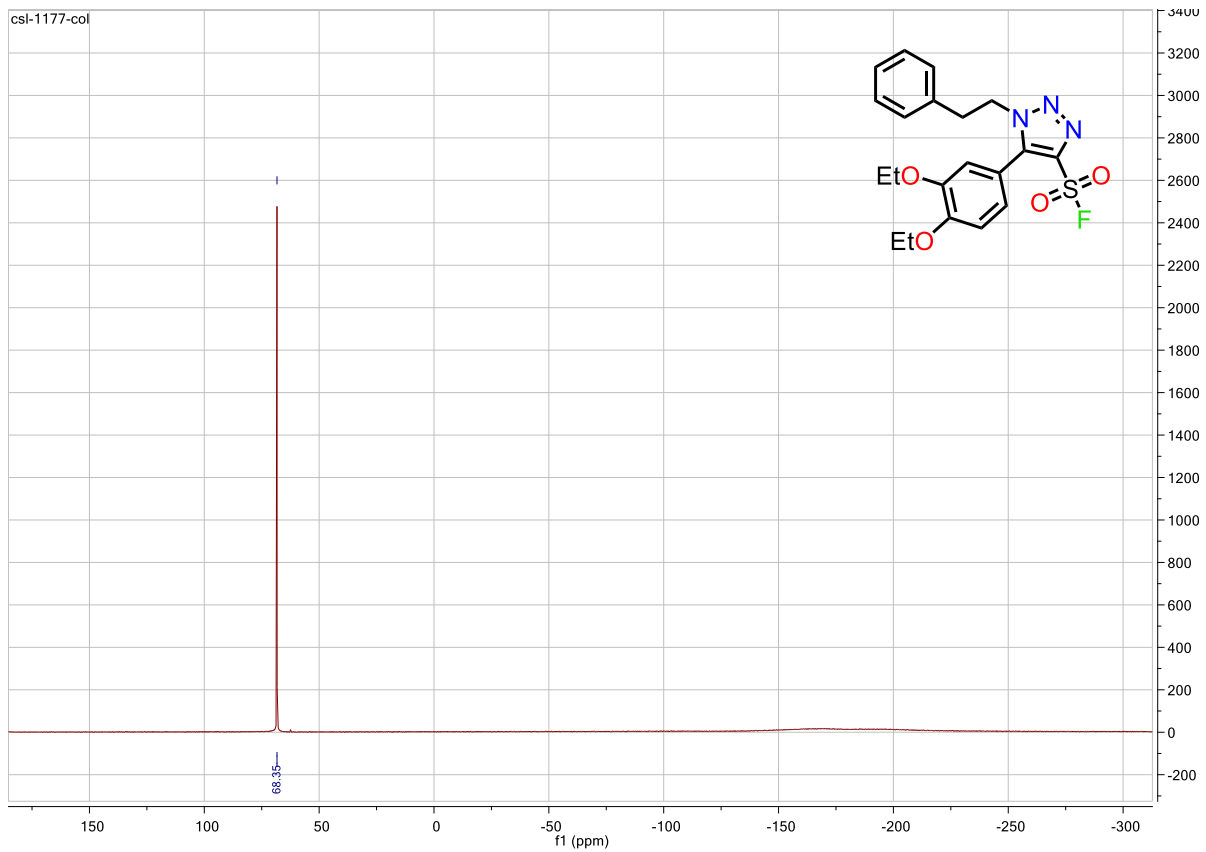



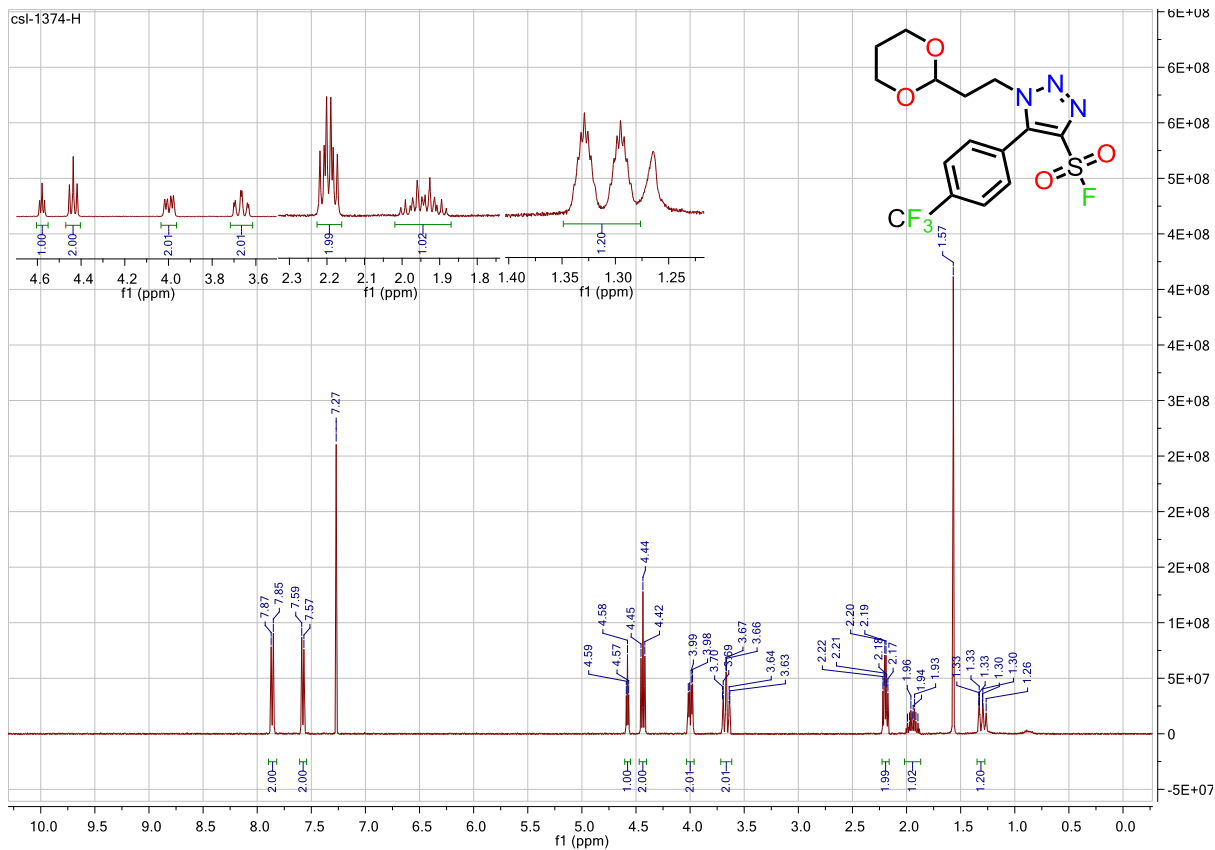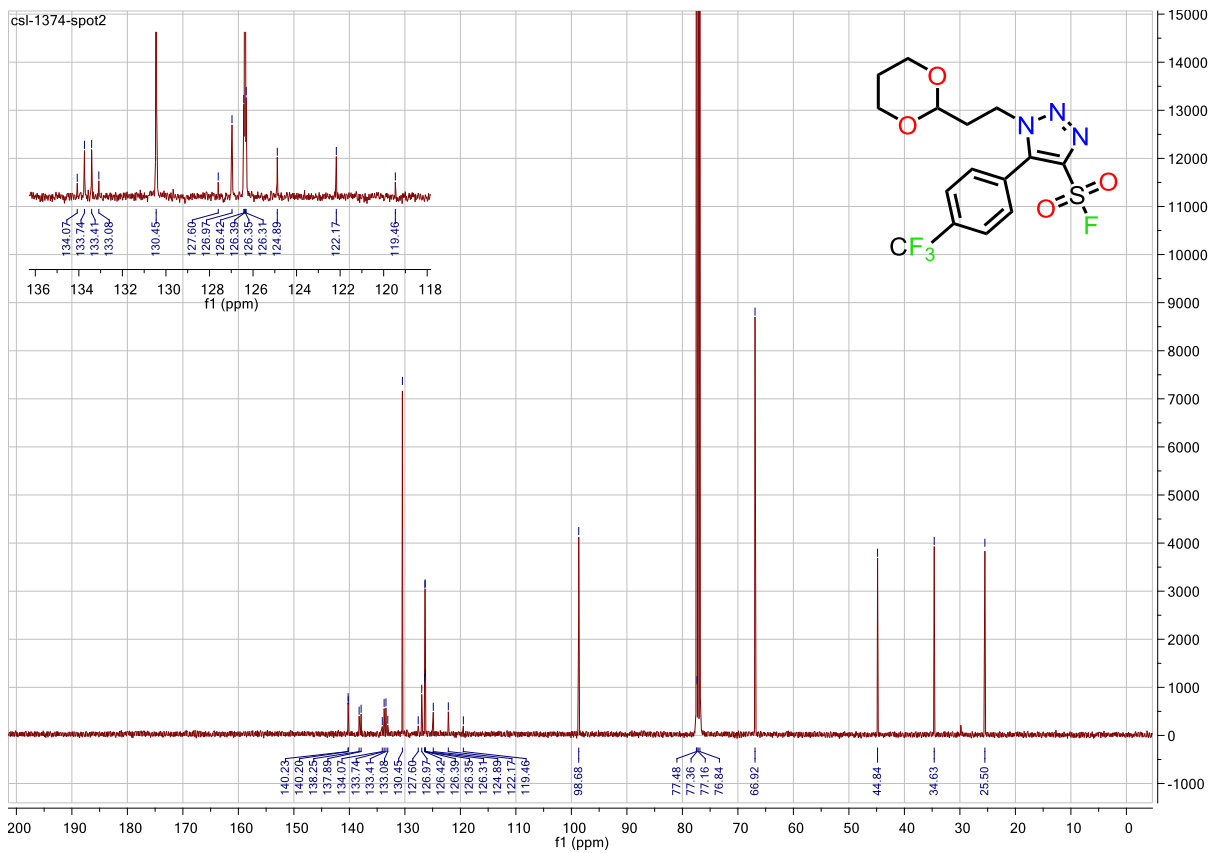

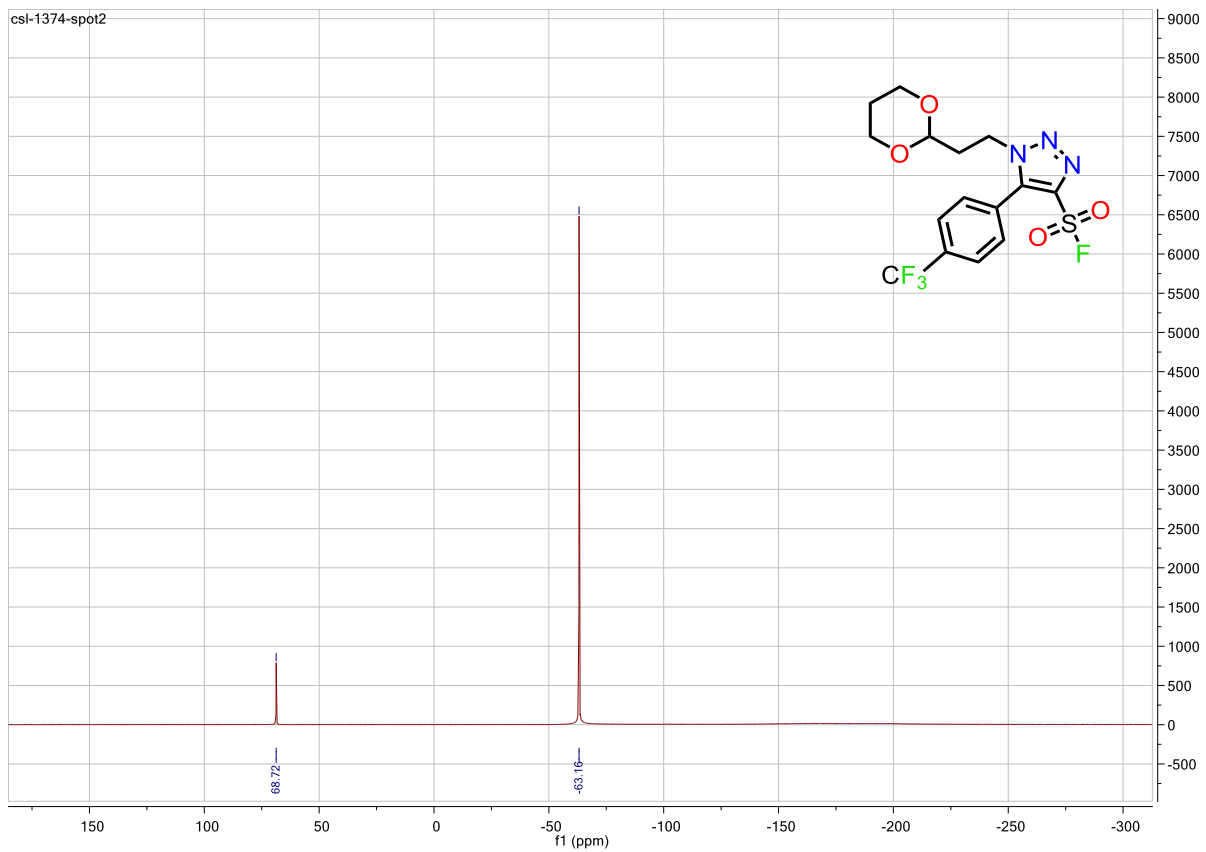



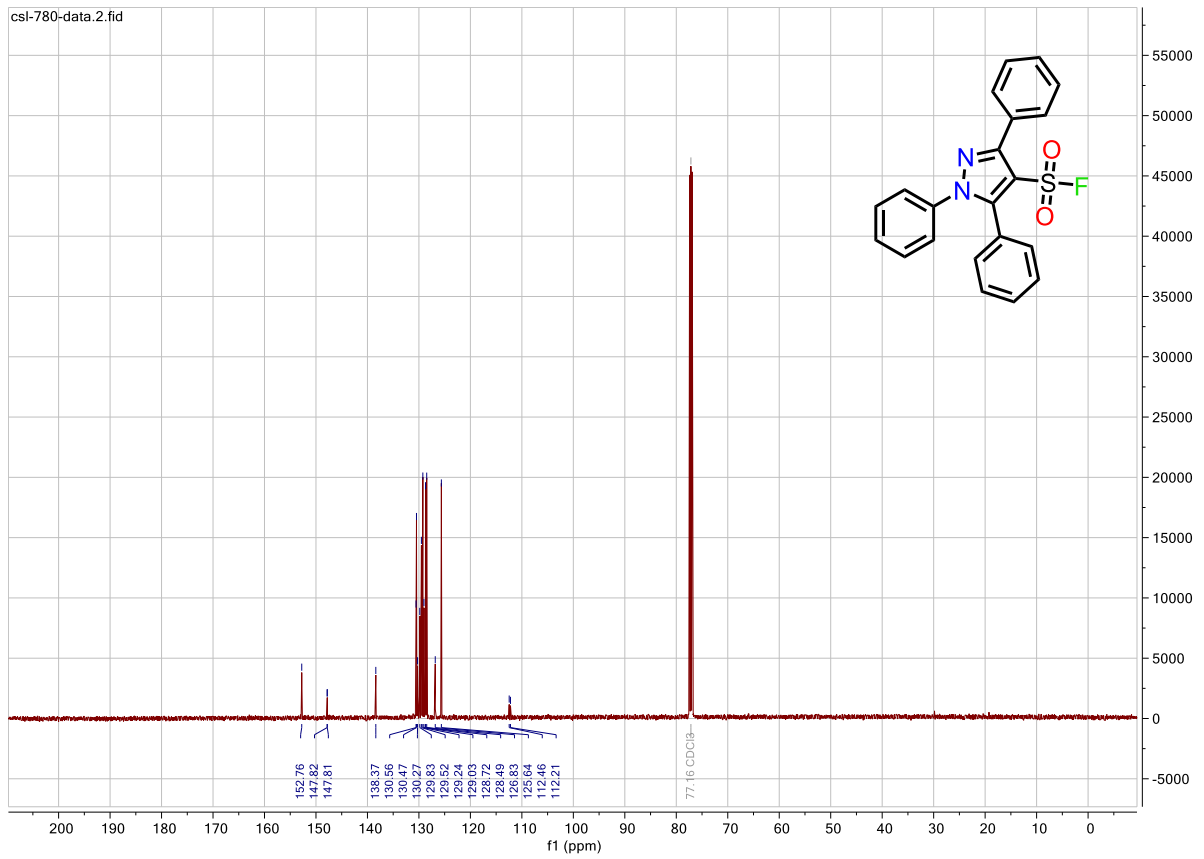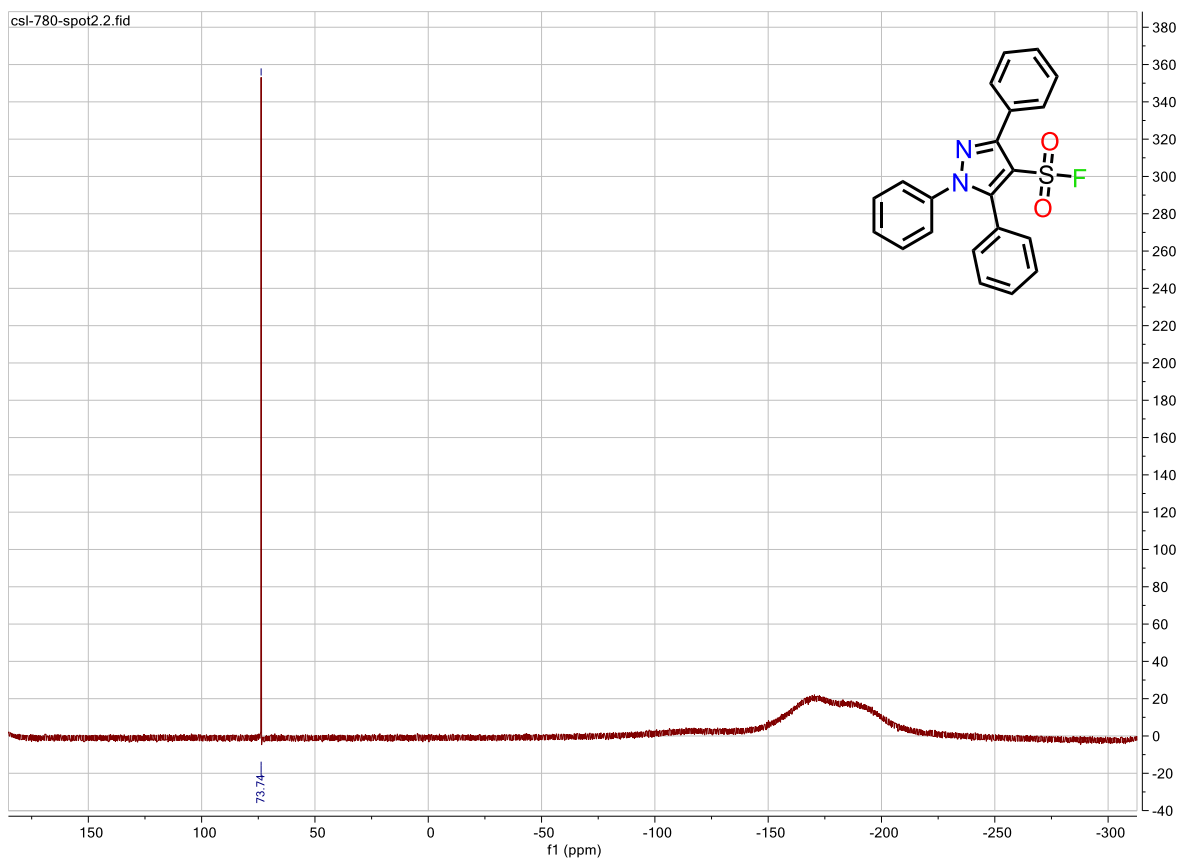

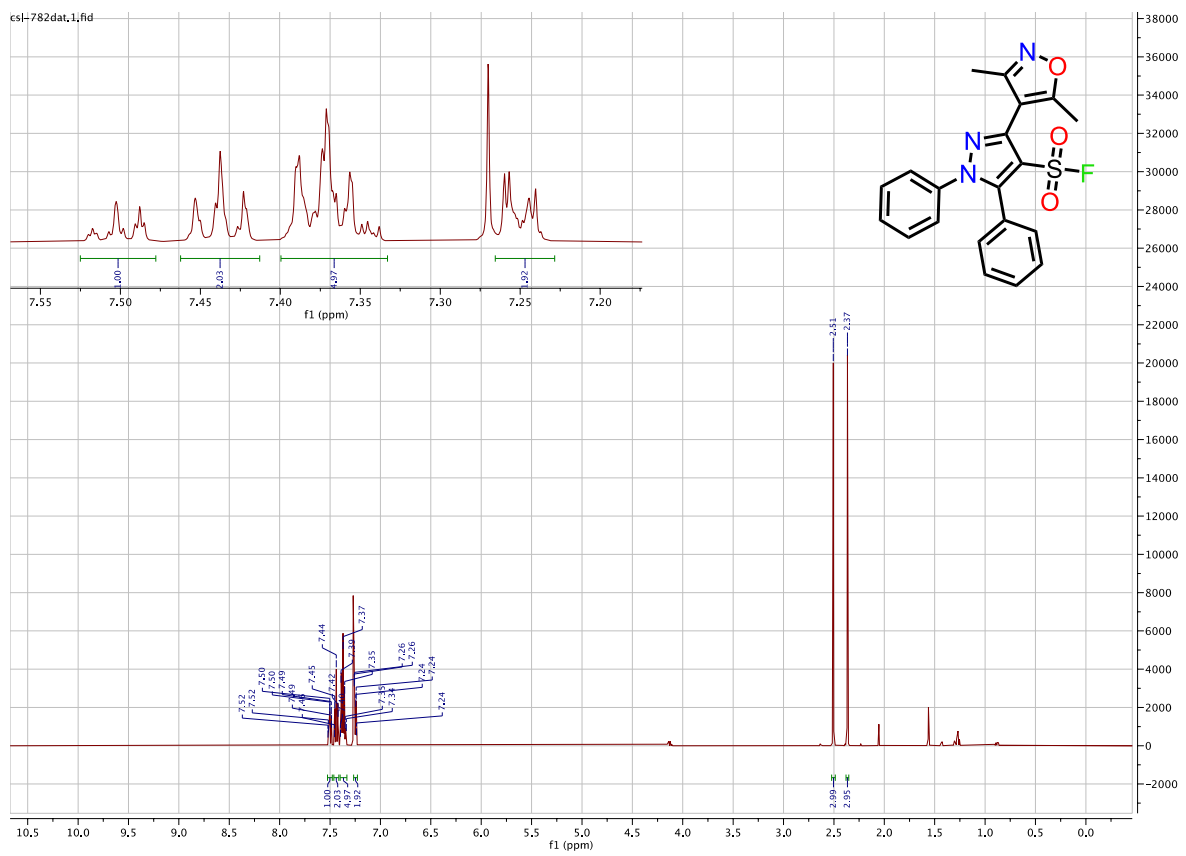

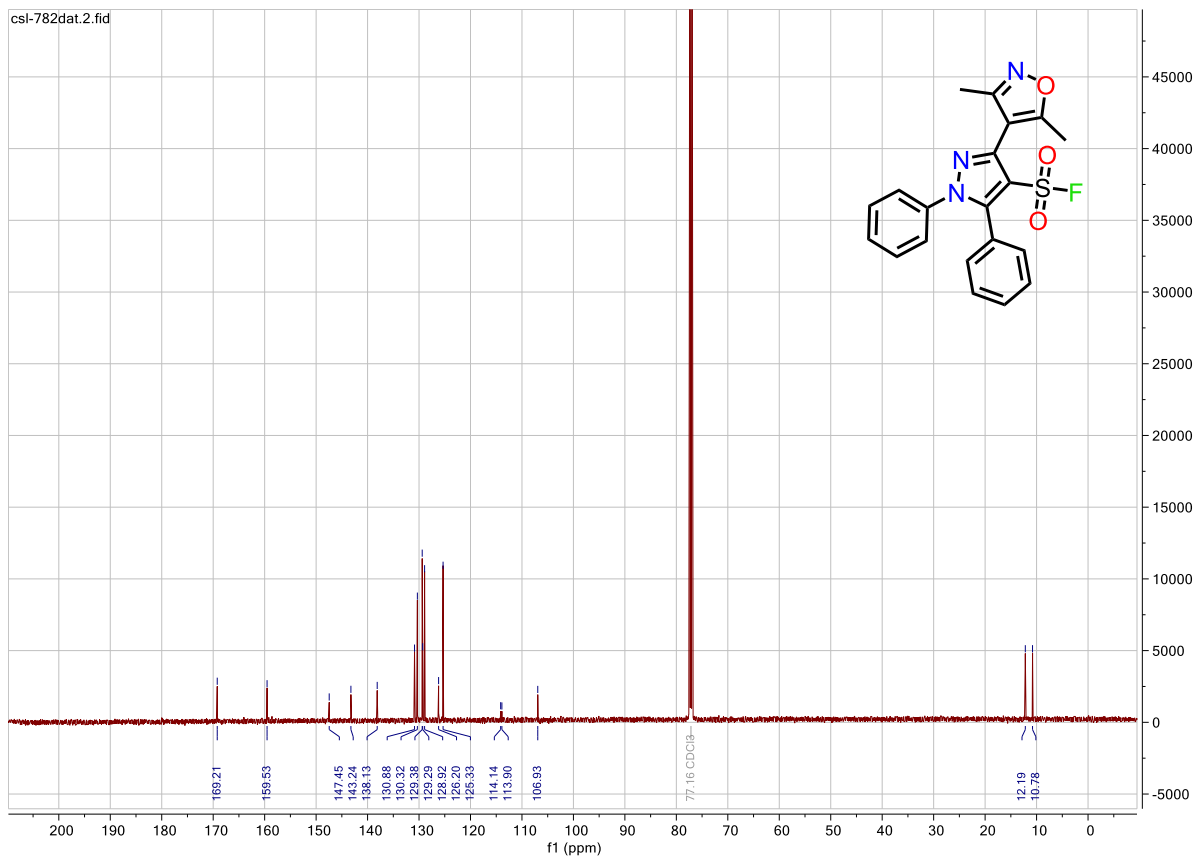

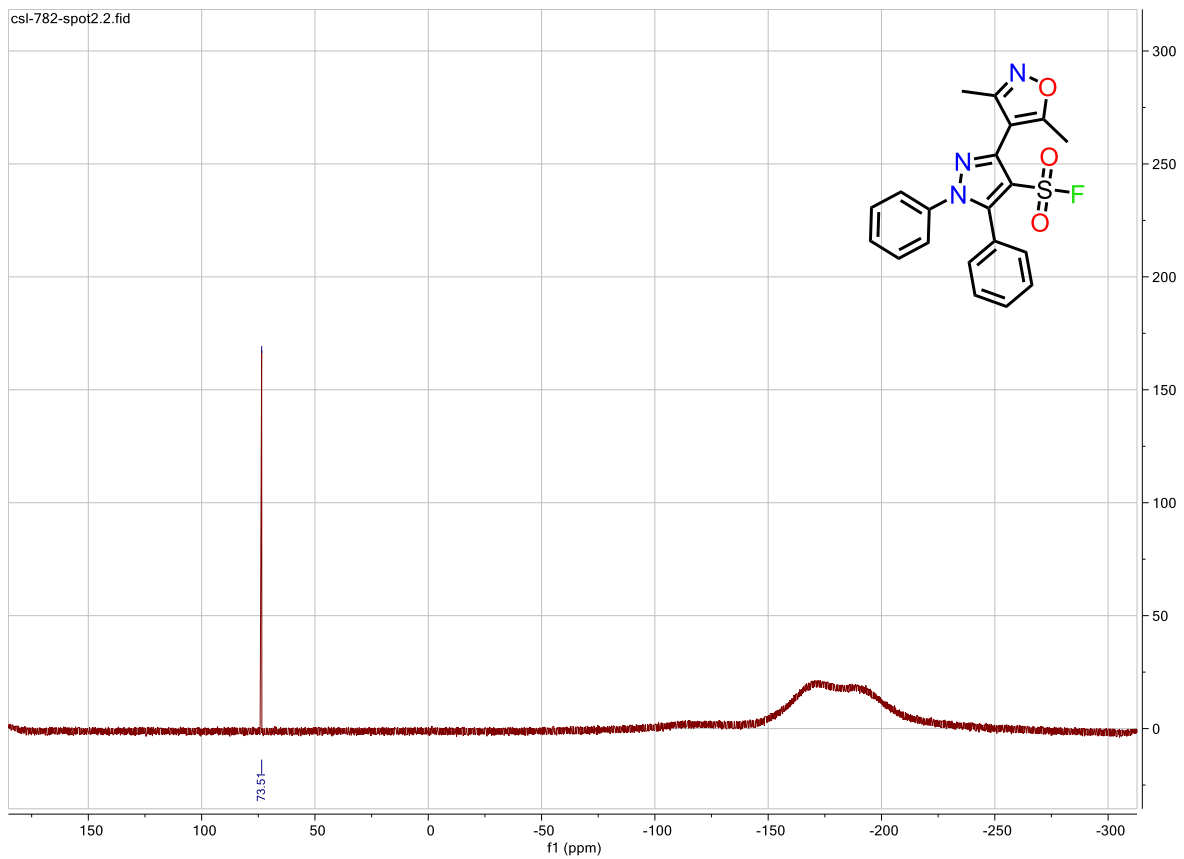

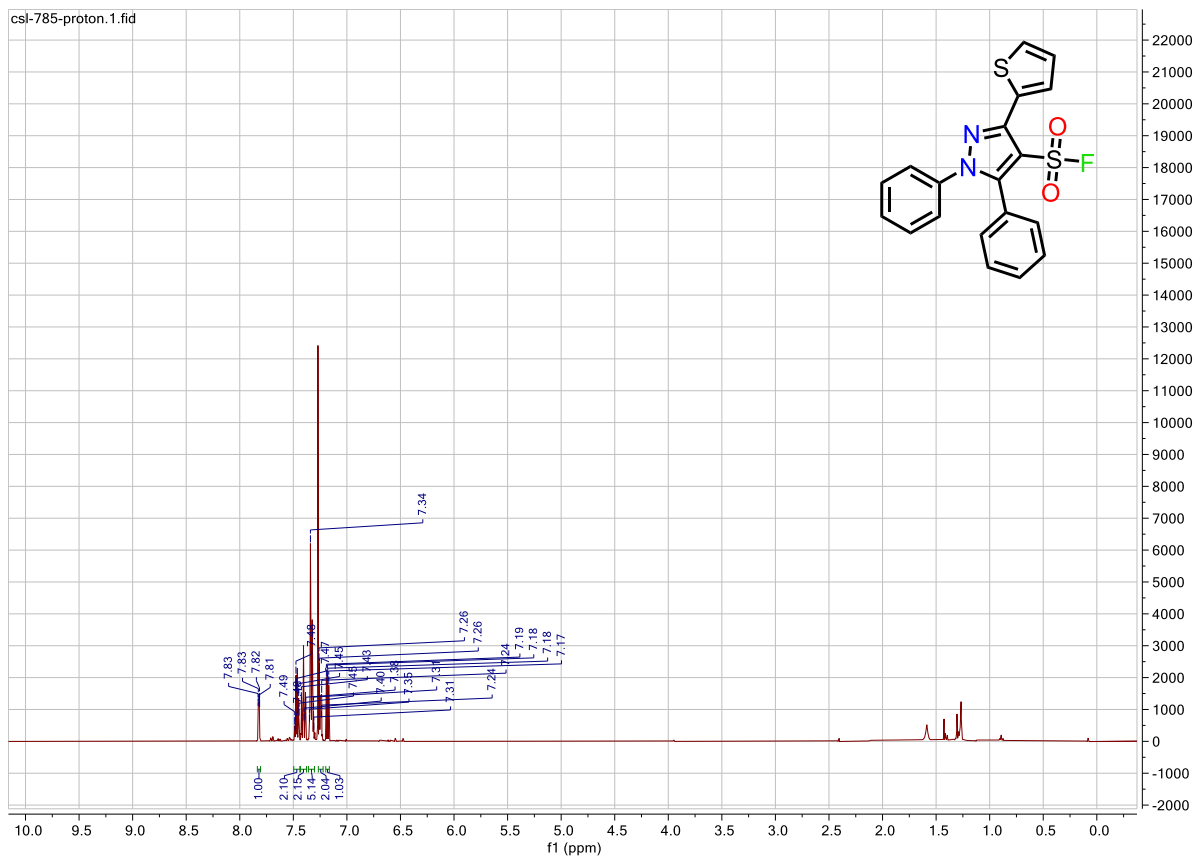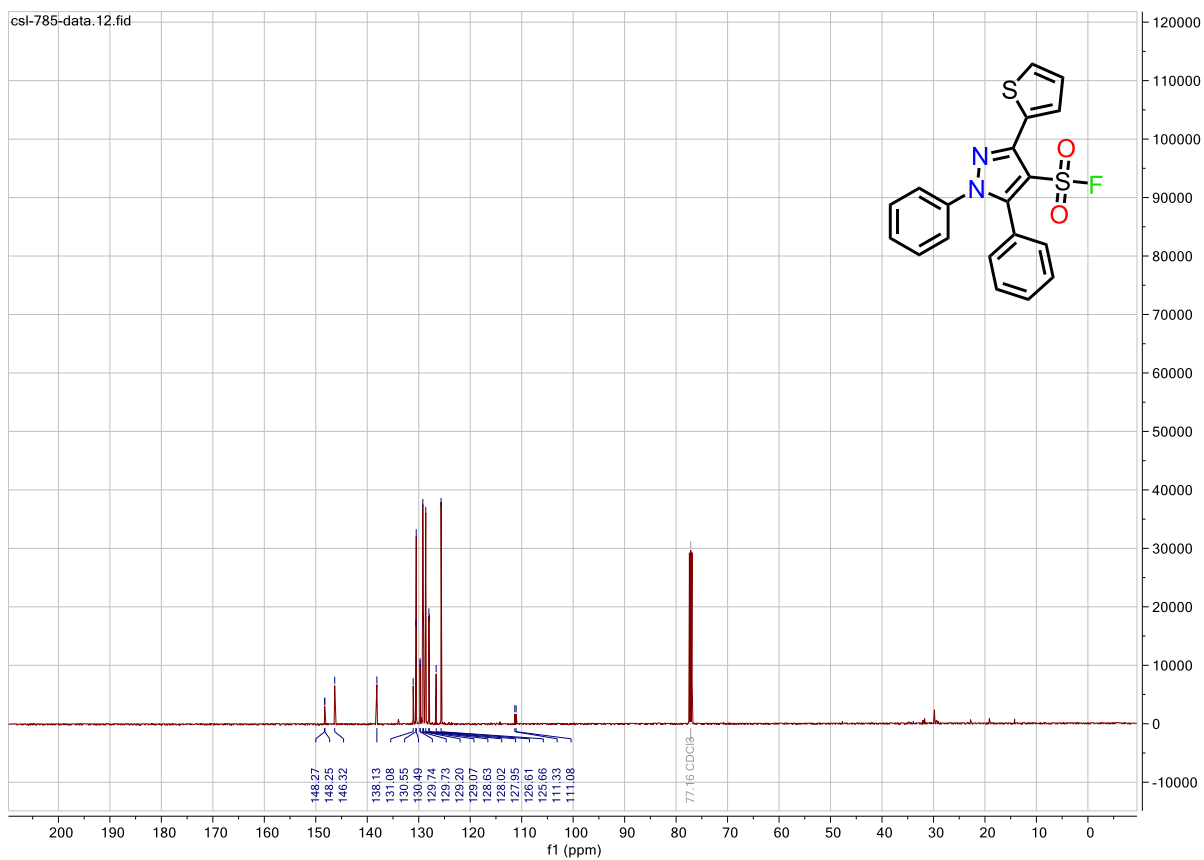



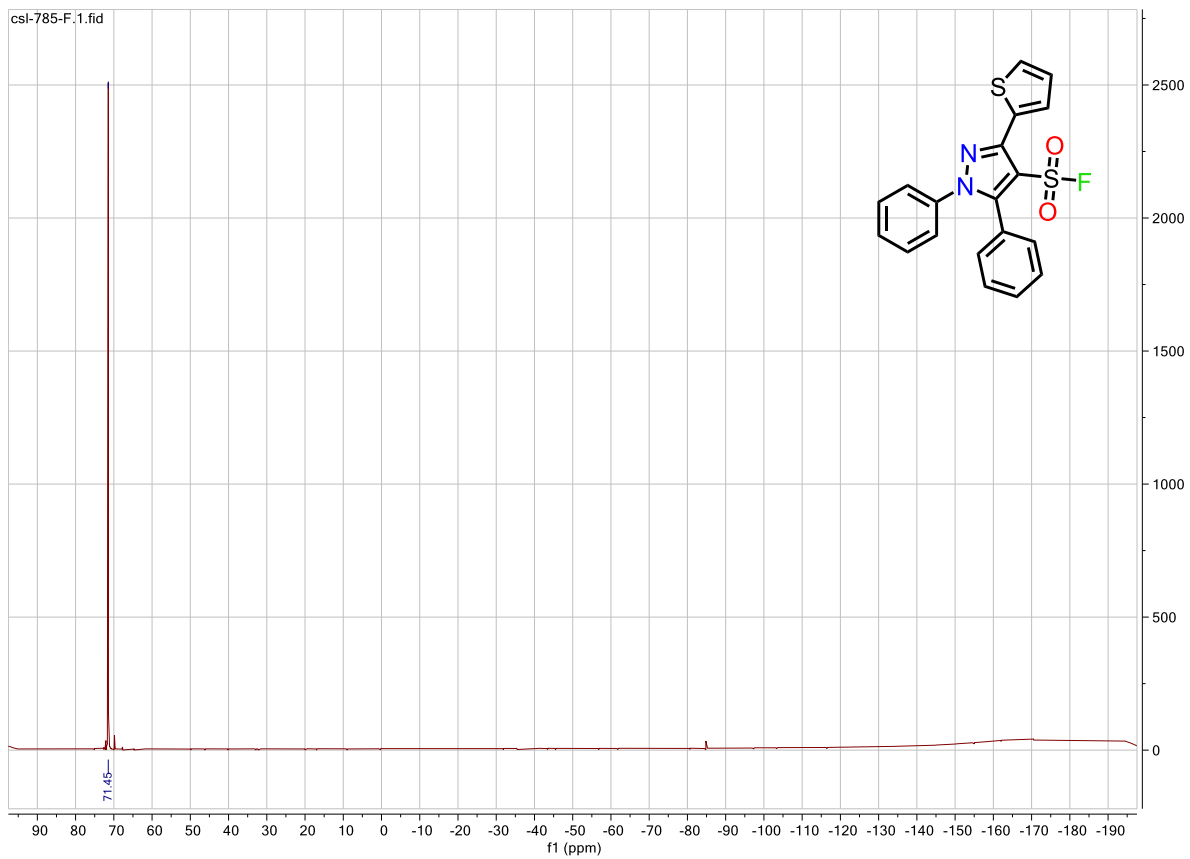

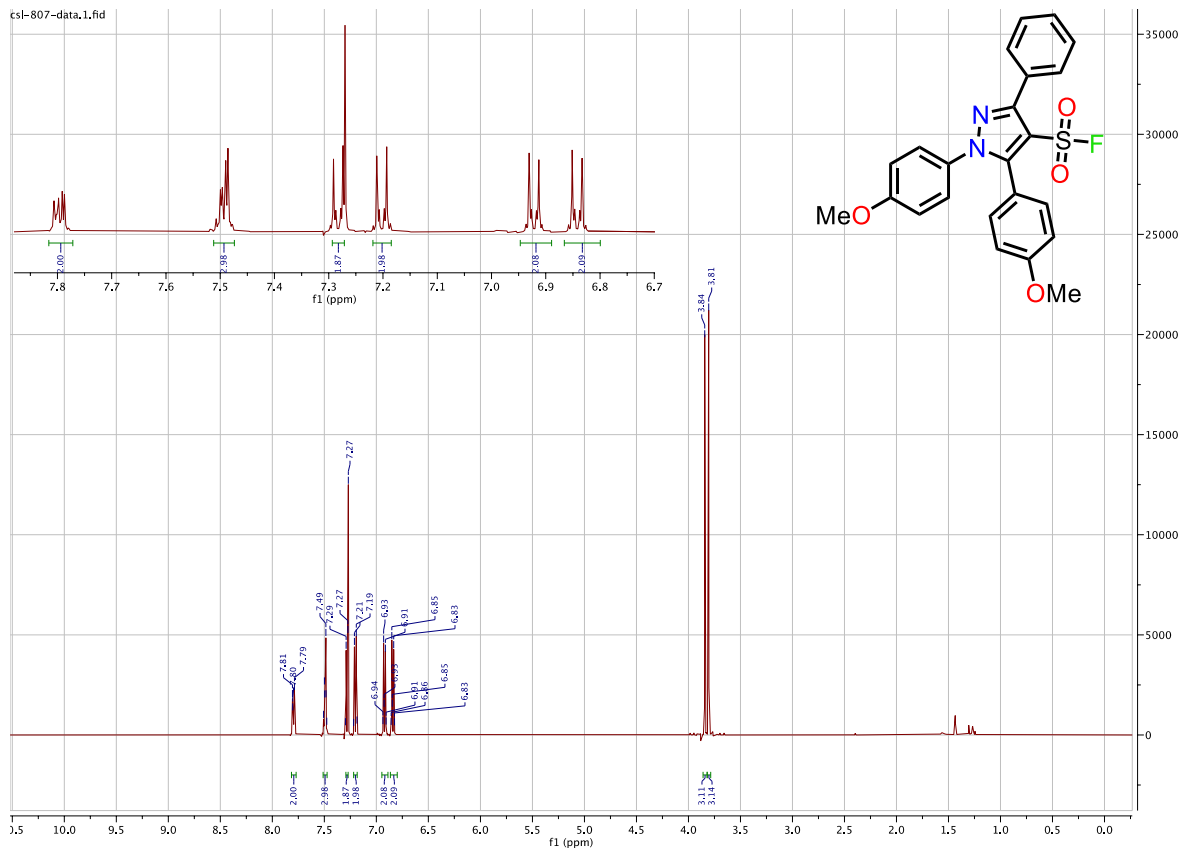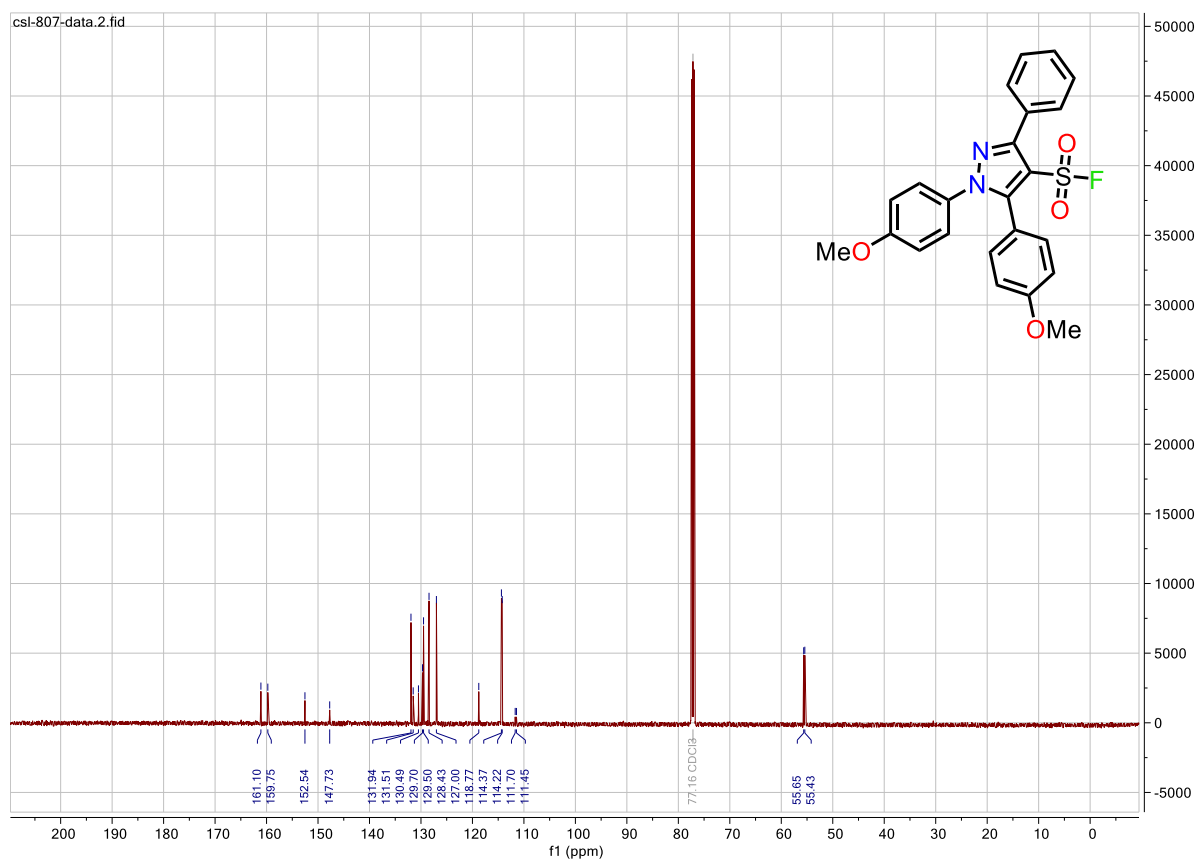

csi-807-F.1.fid

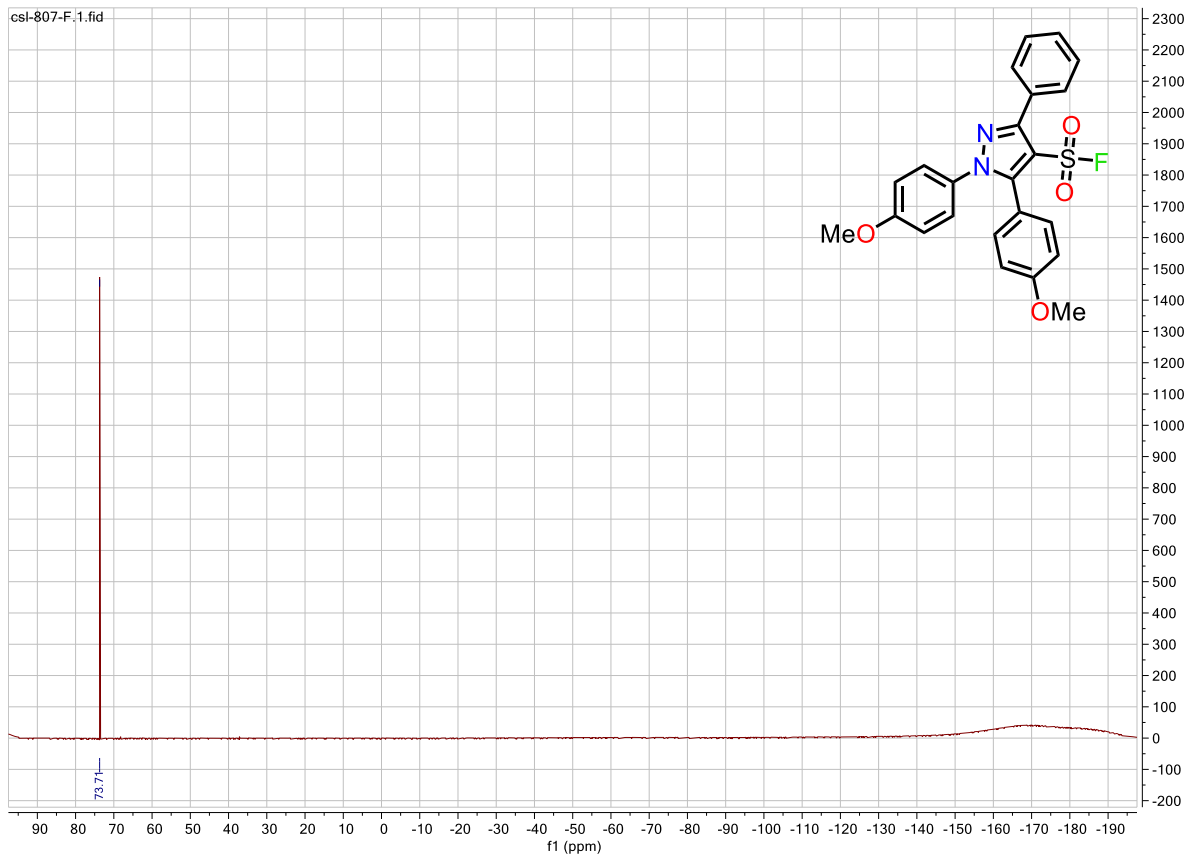



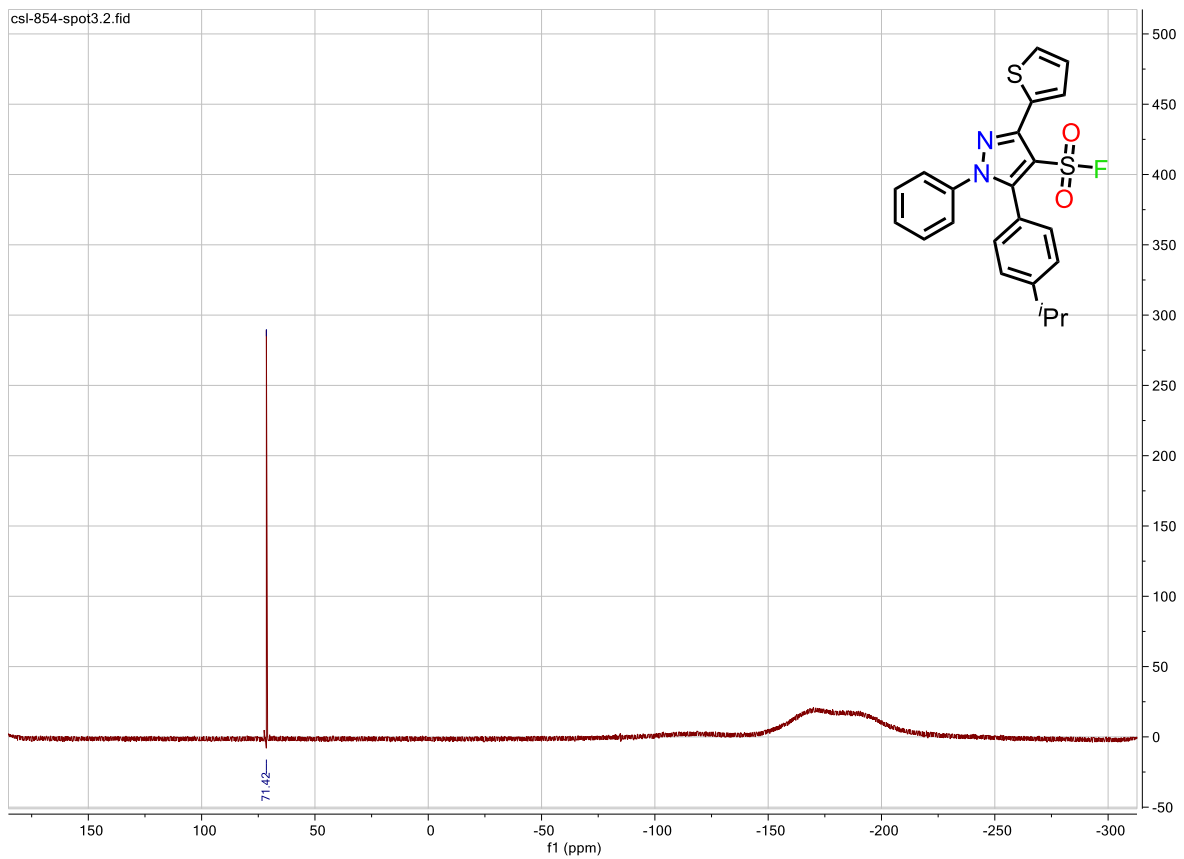

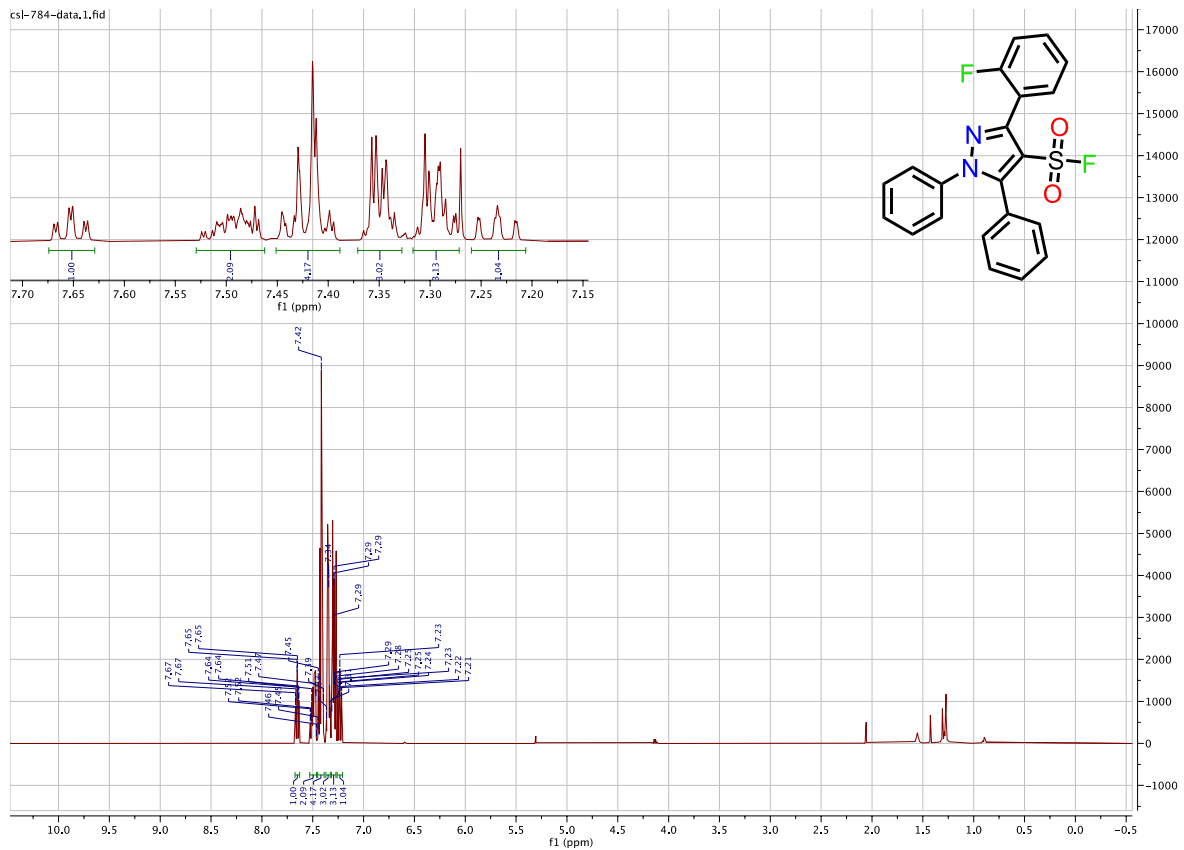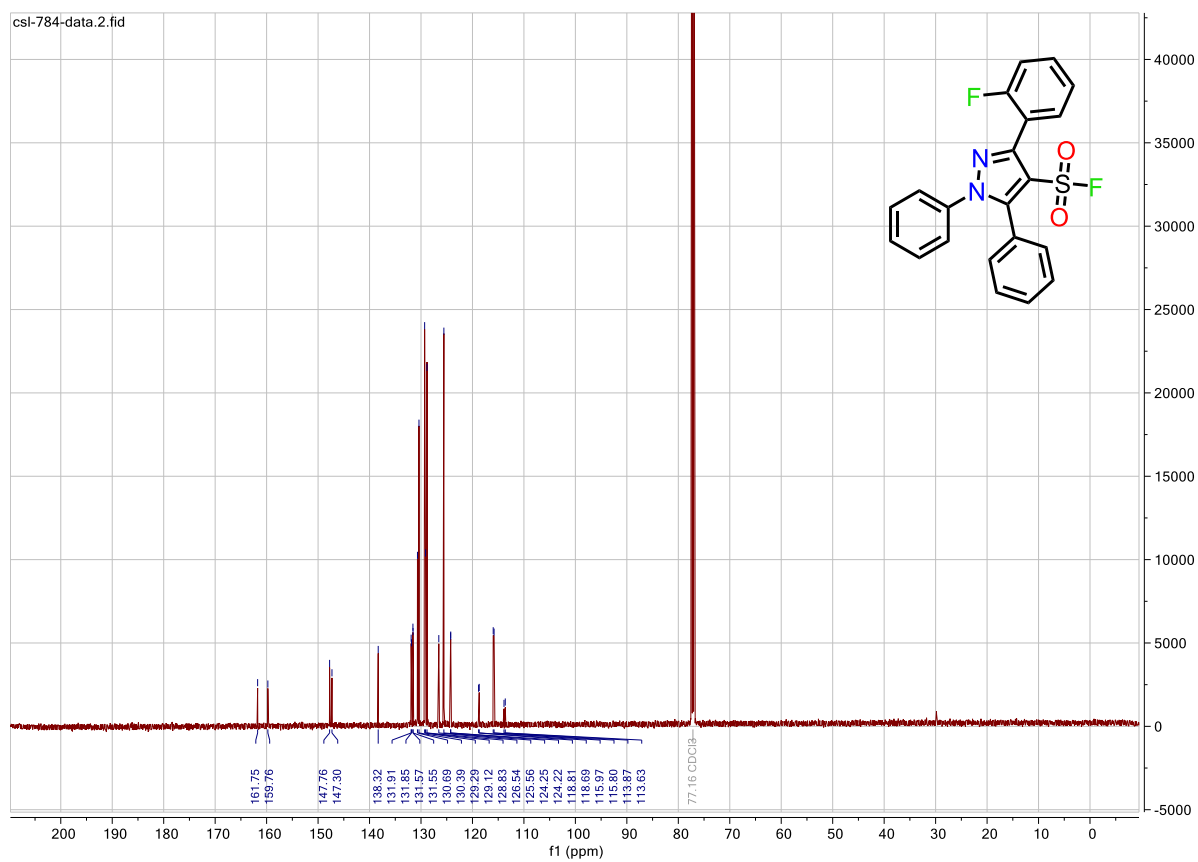

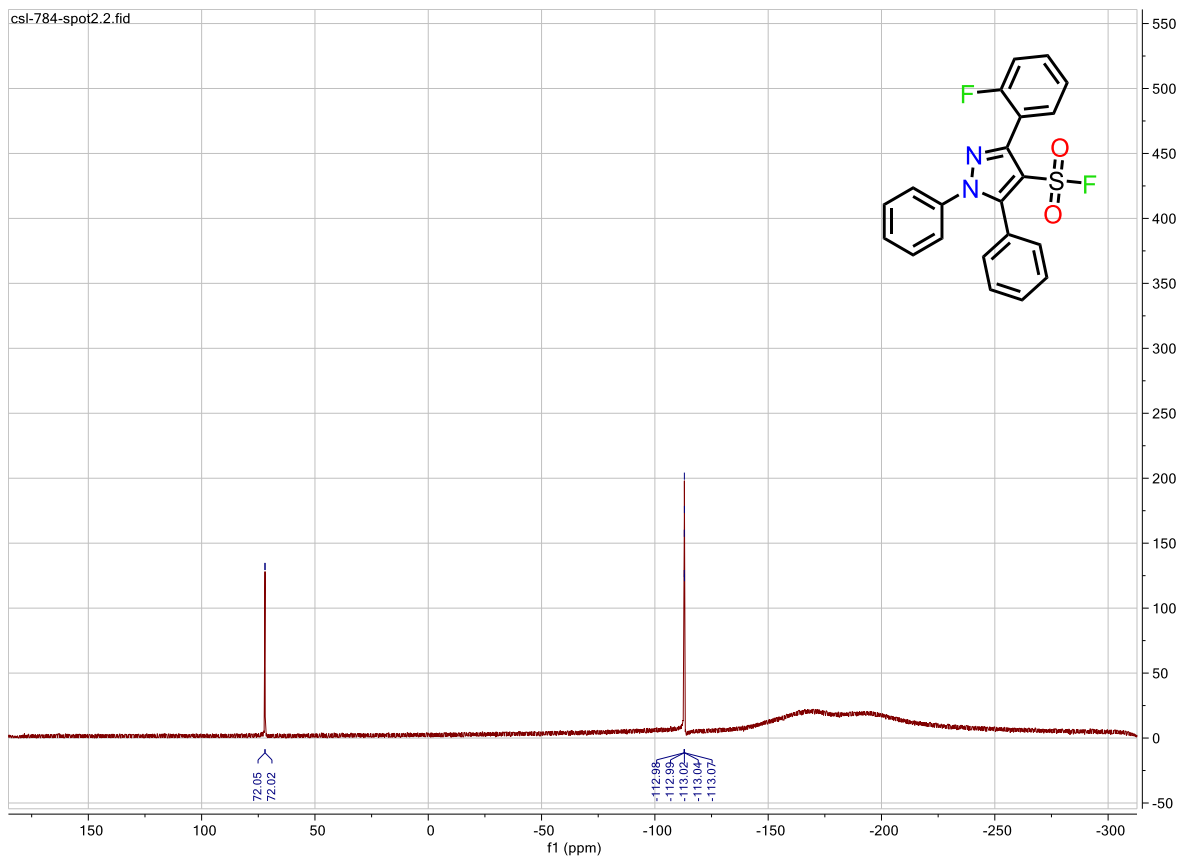

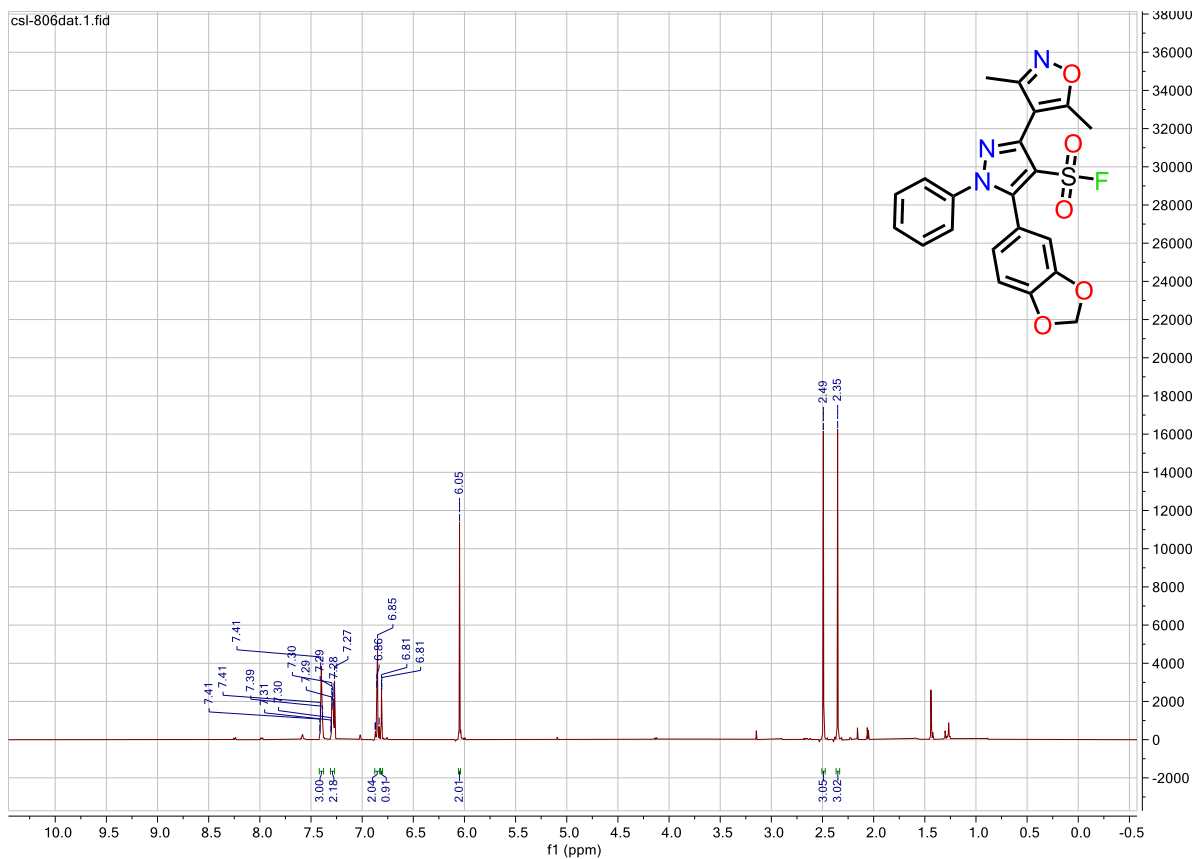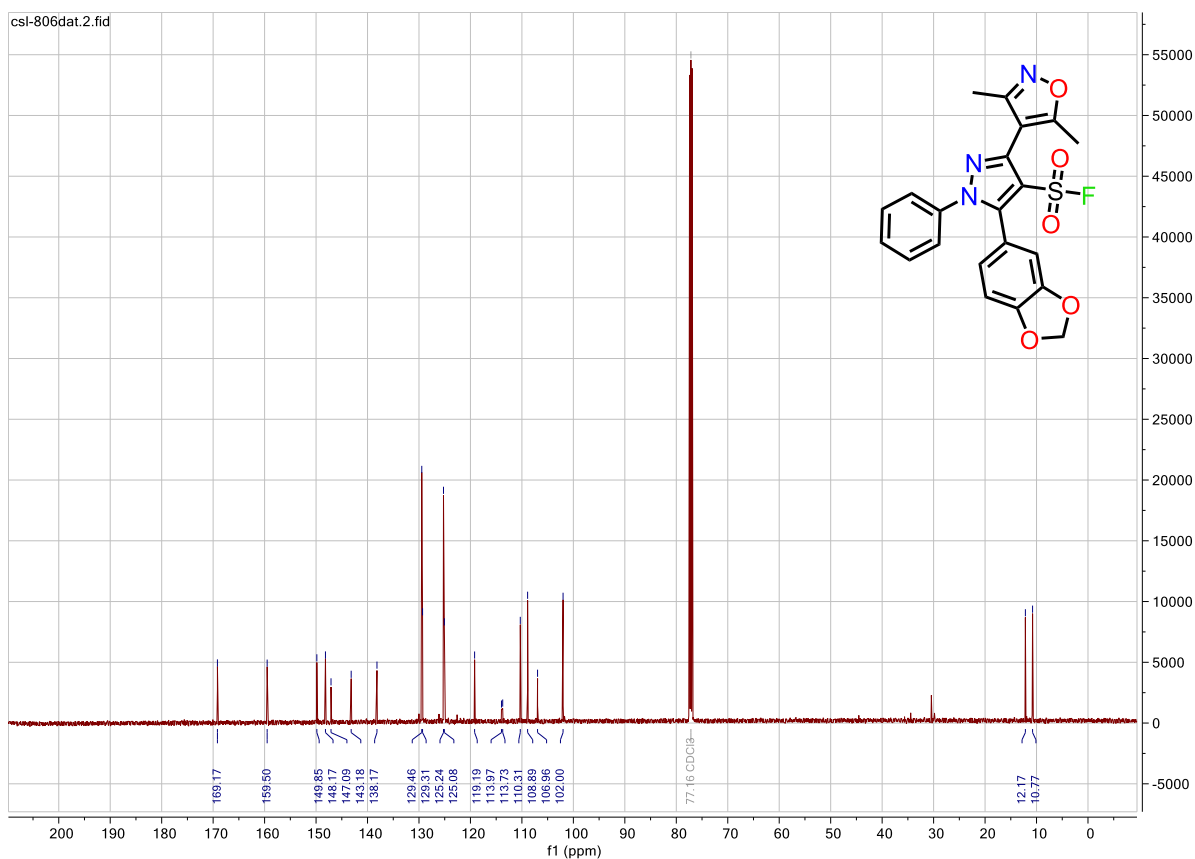



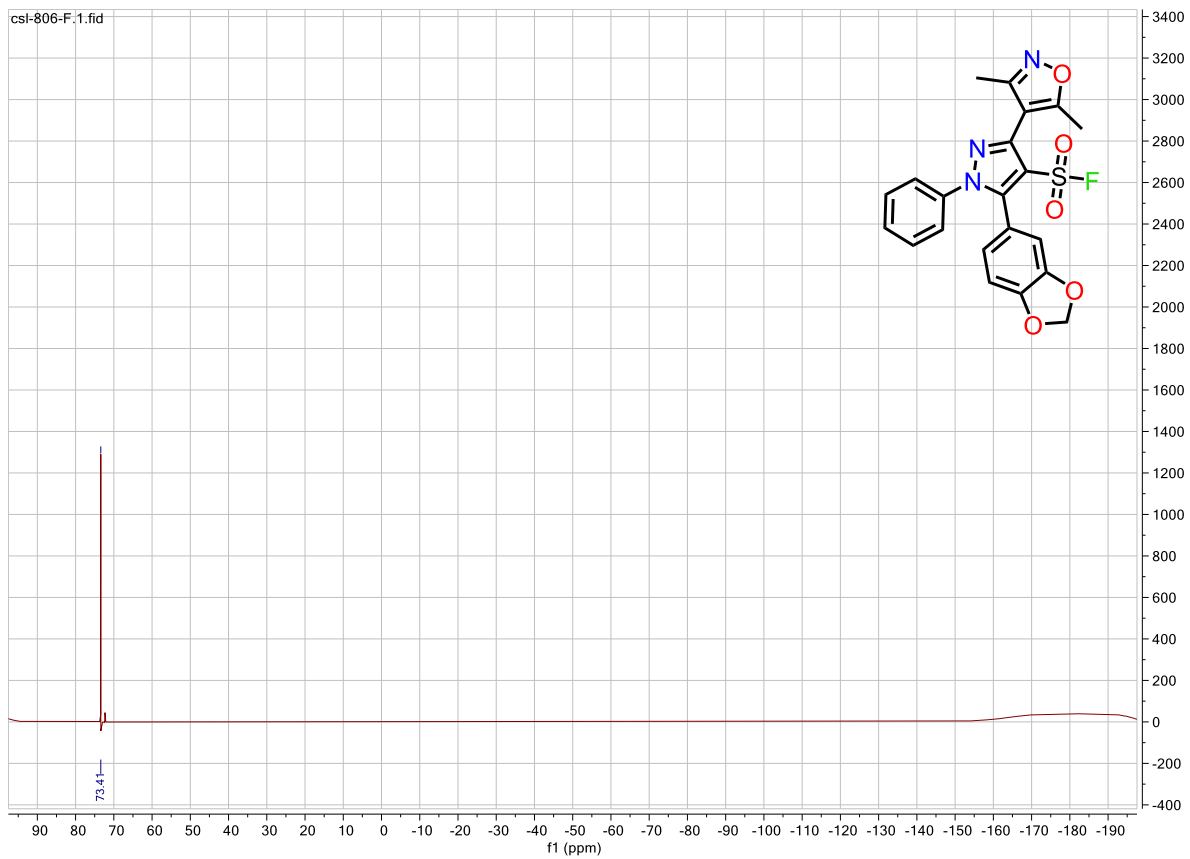

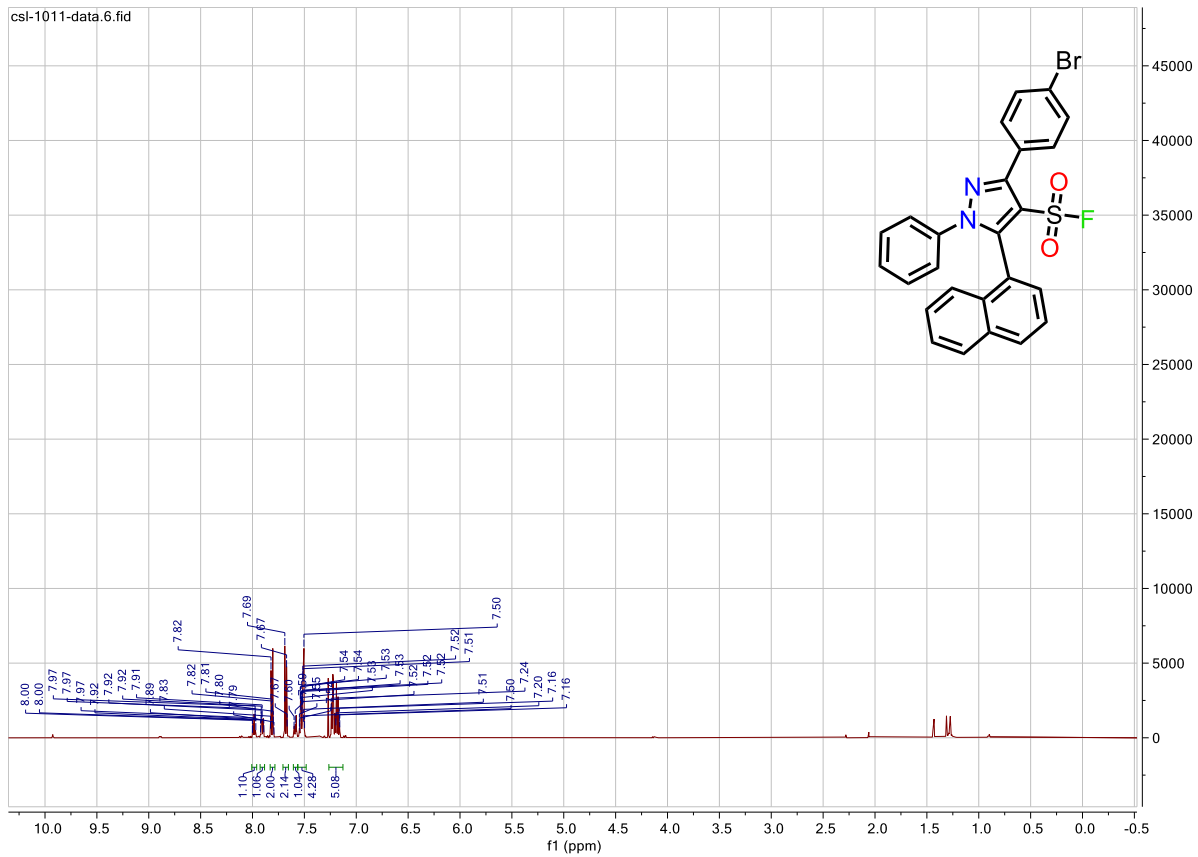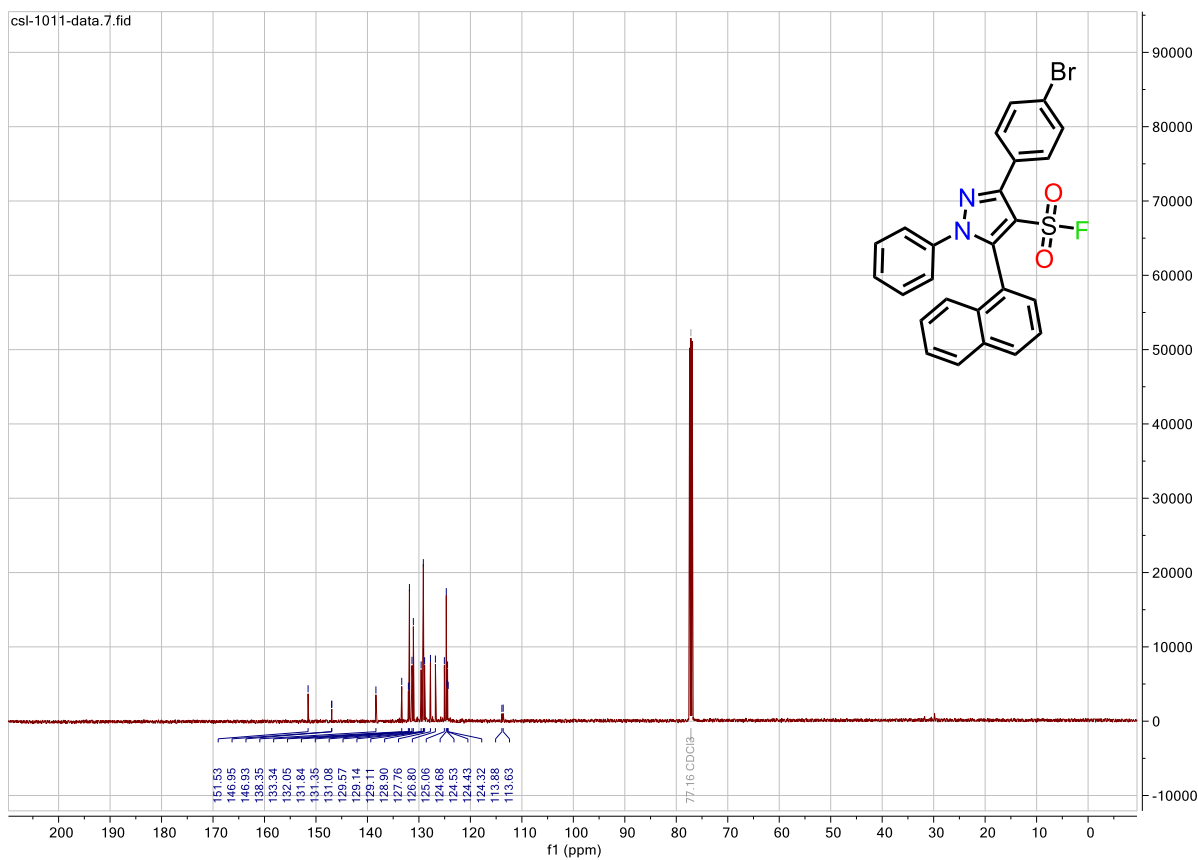

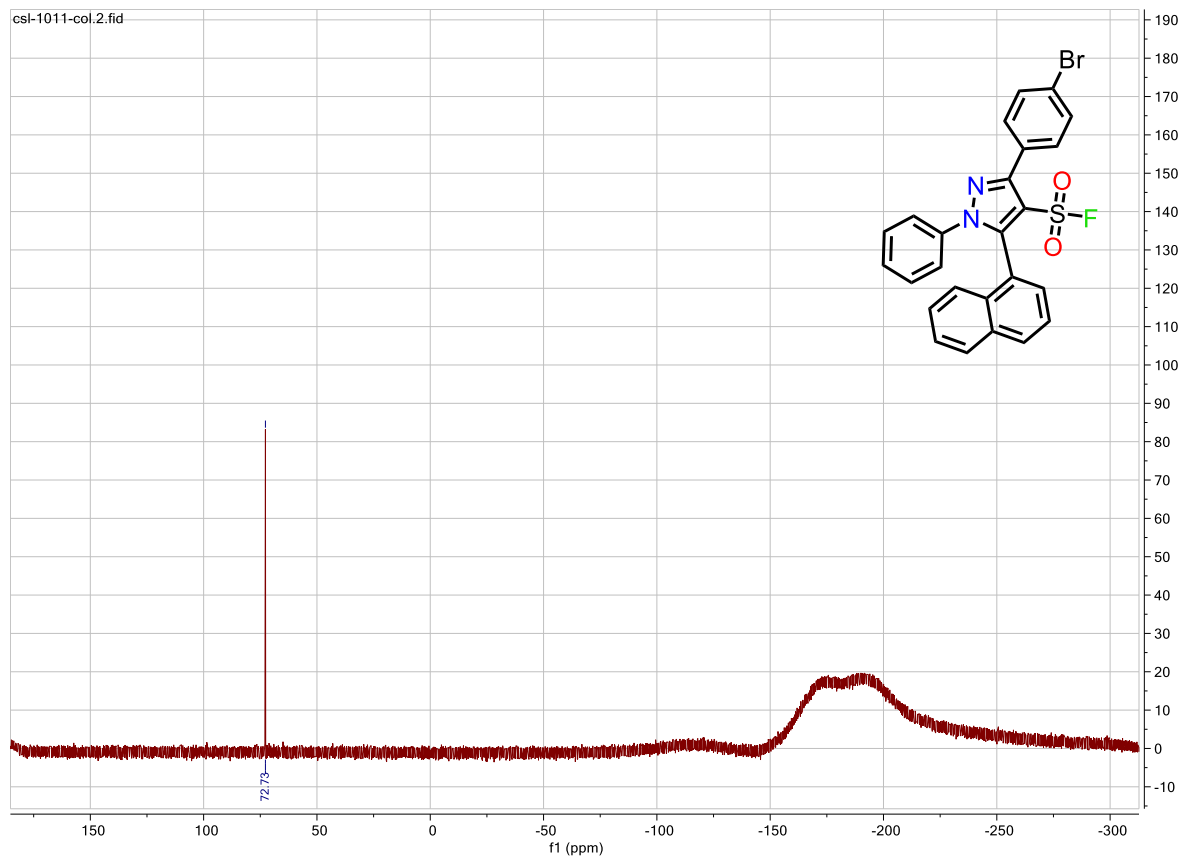

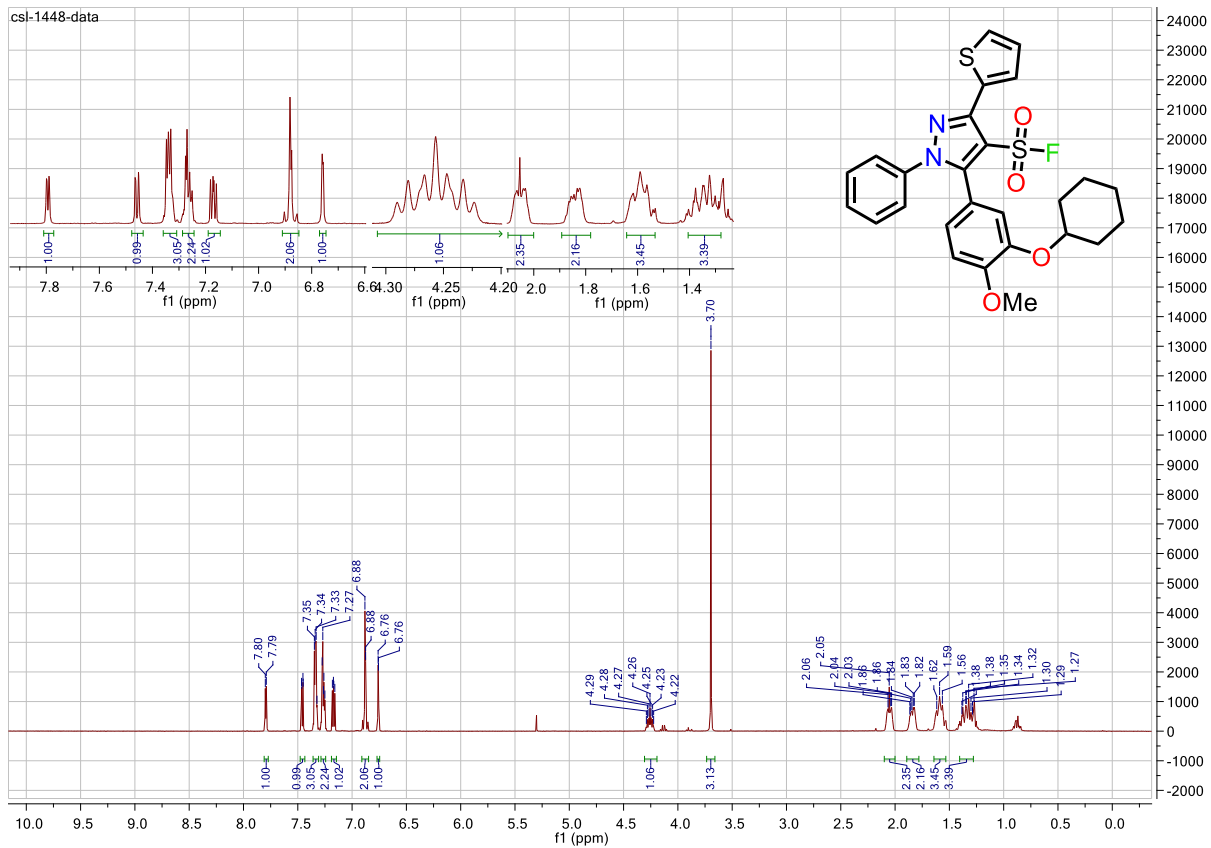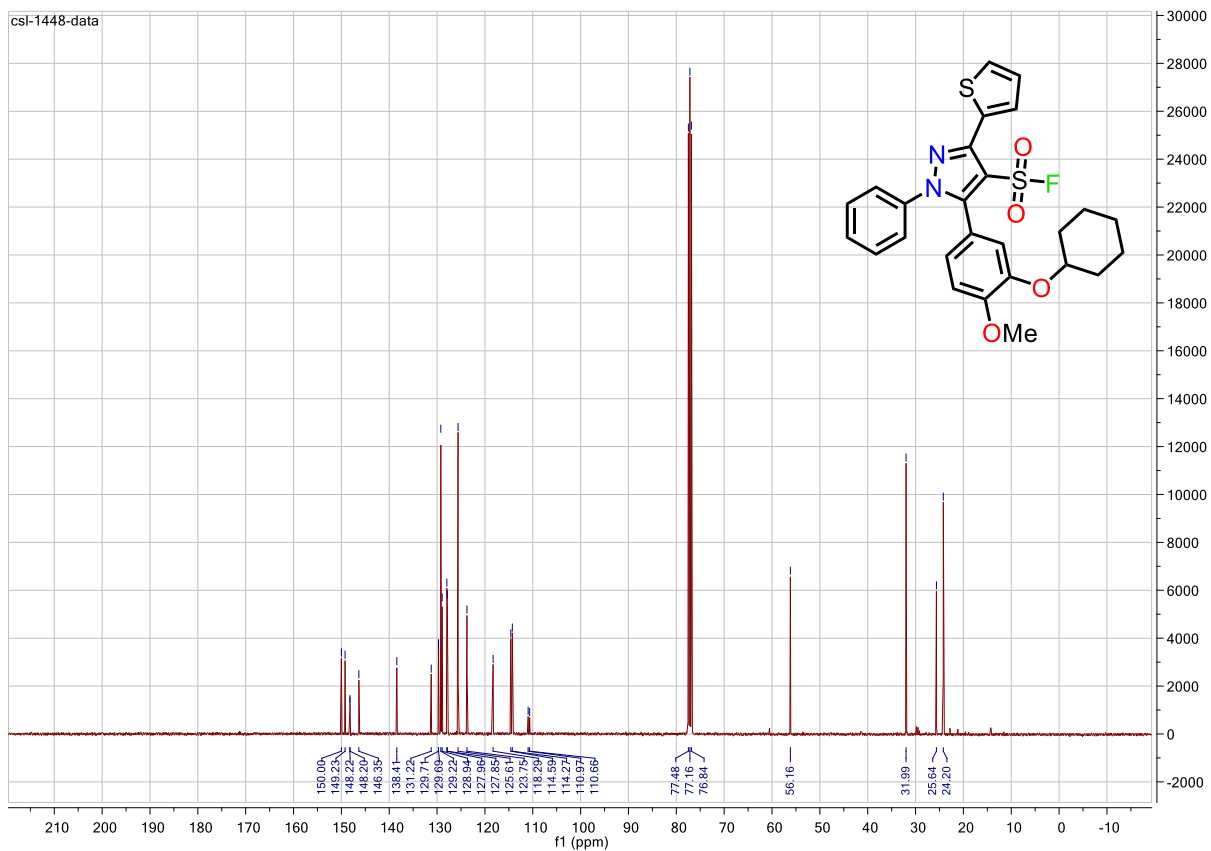

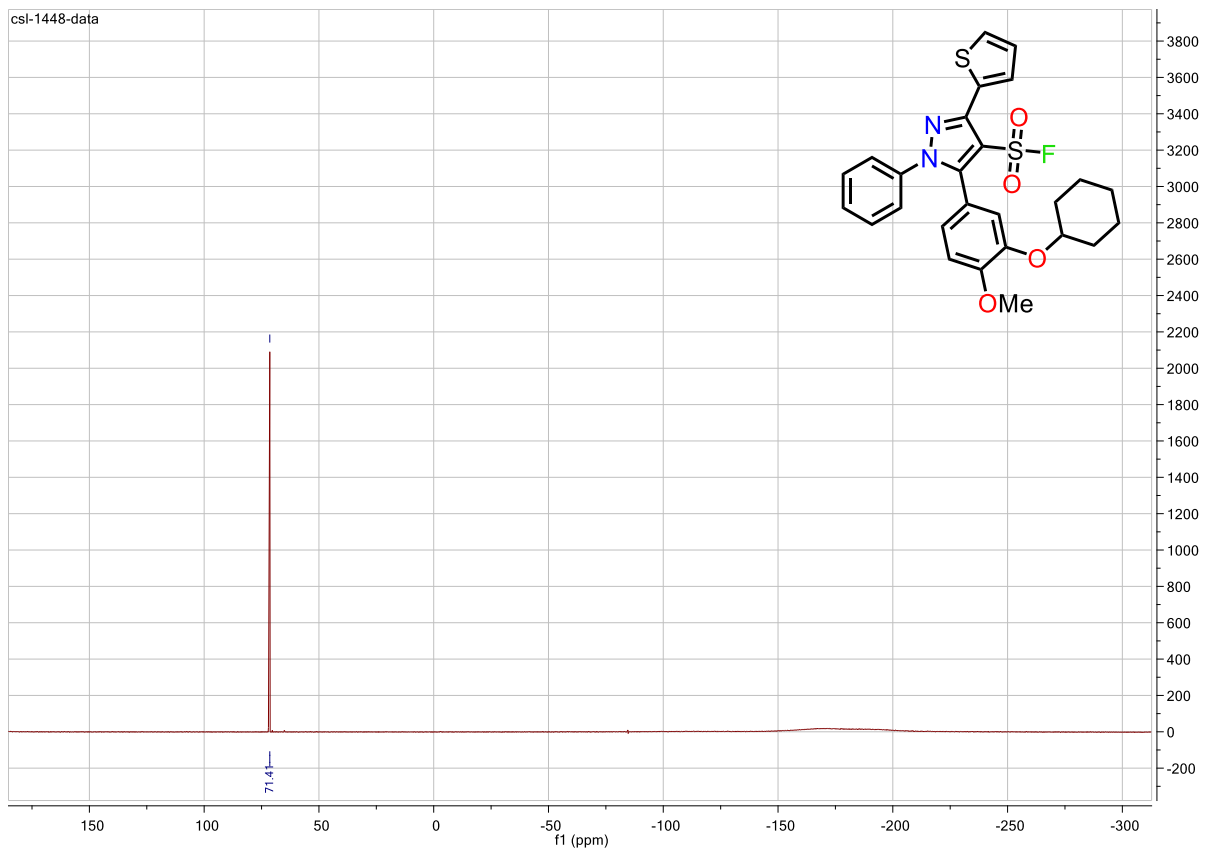

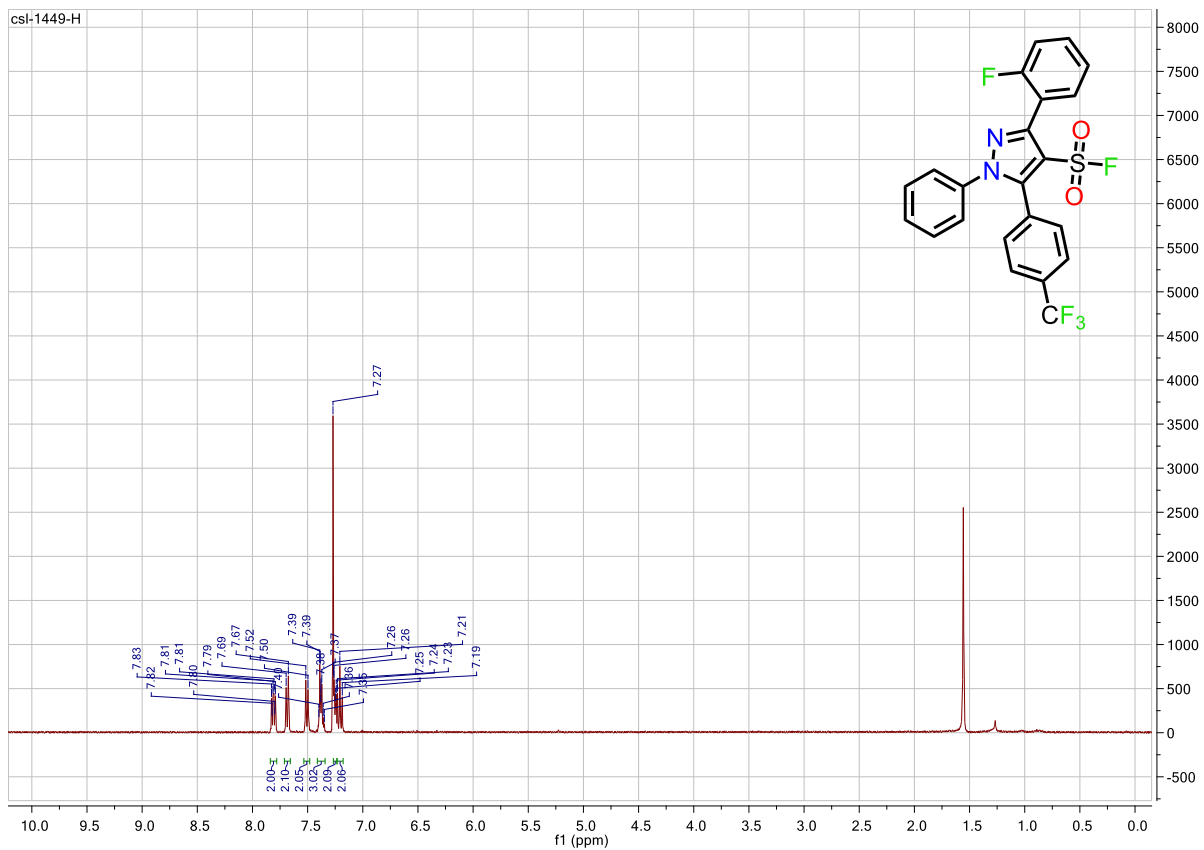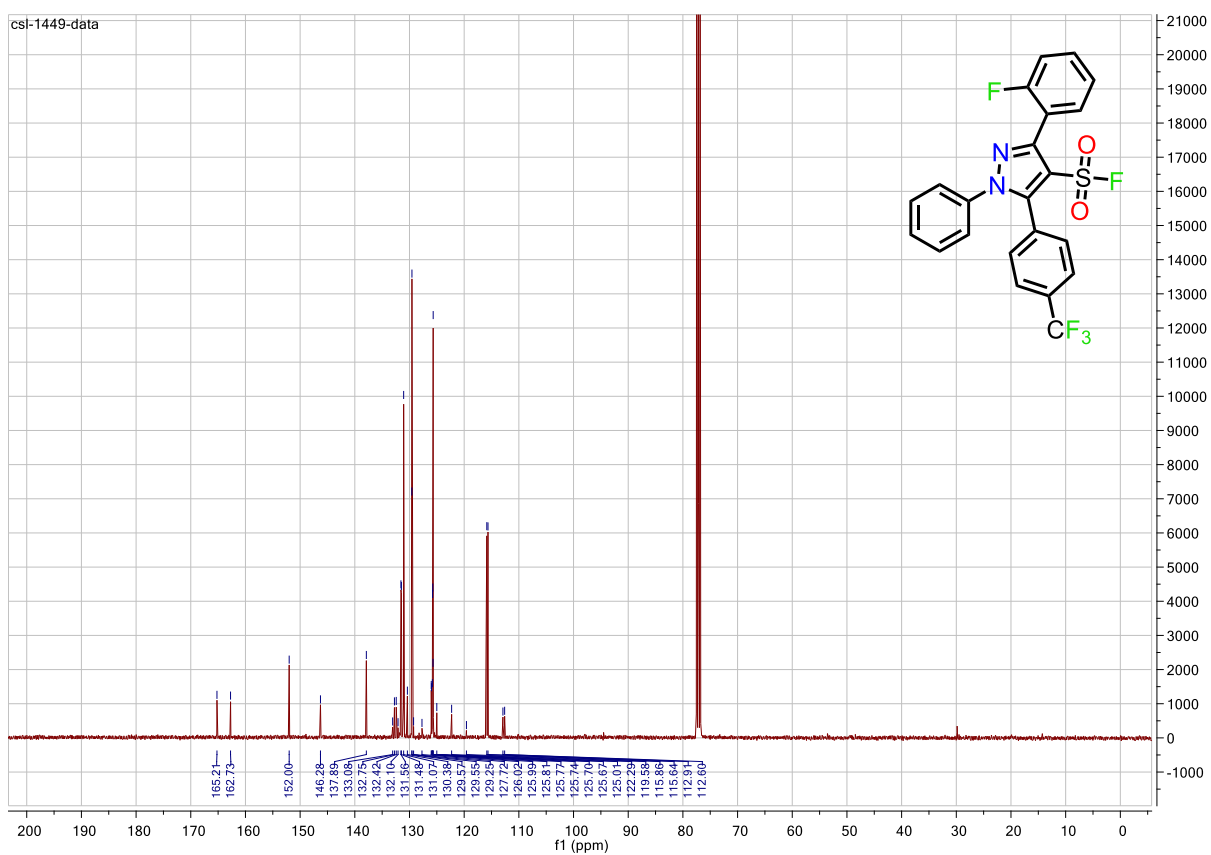

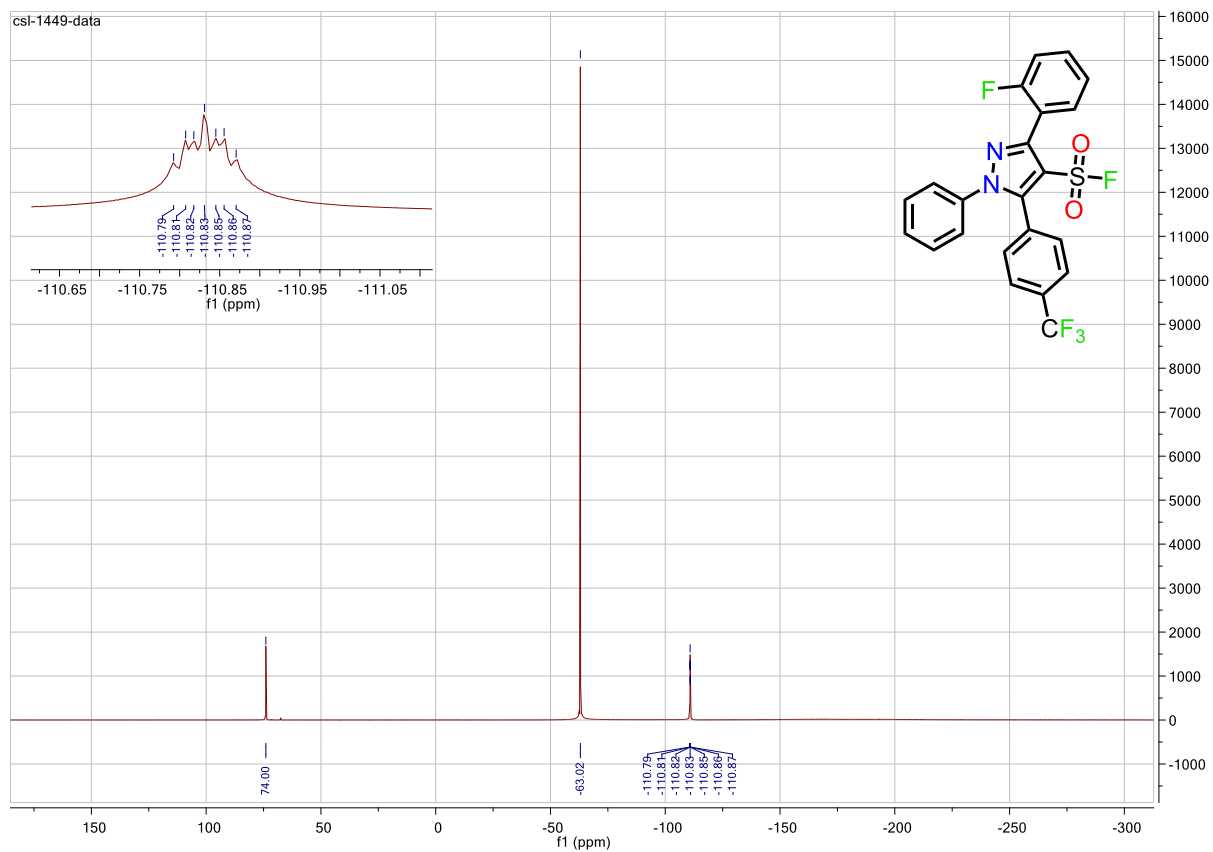

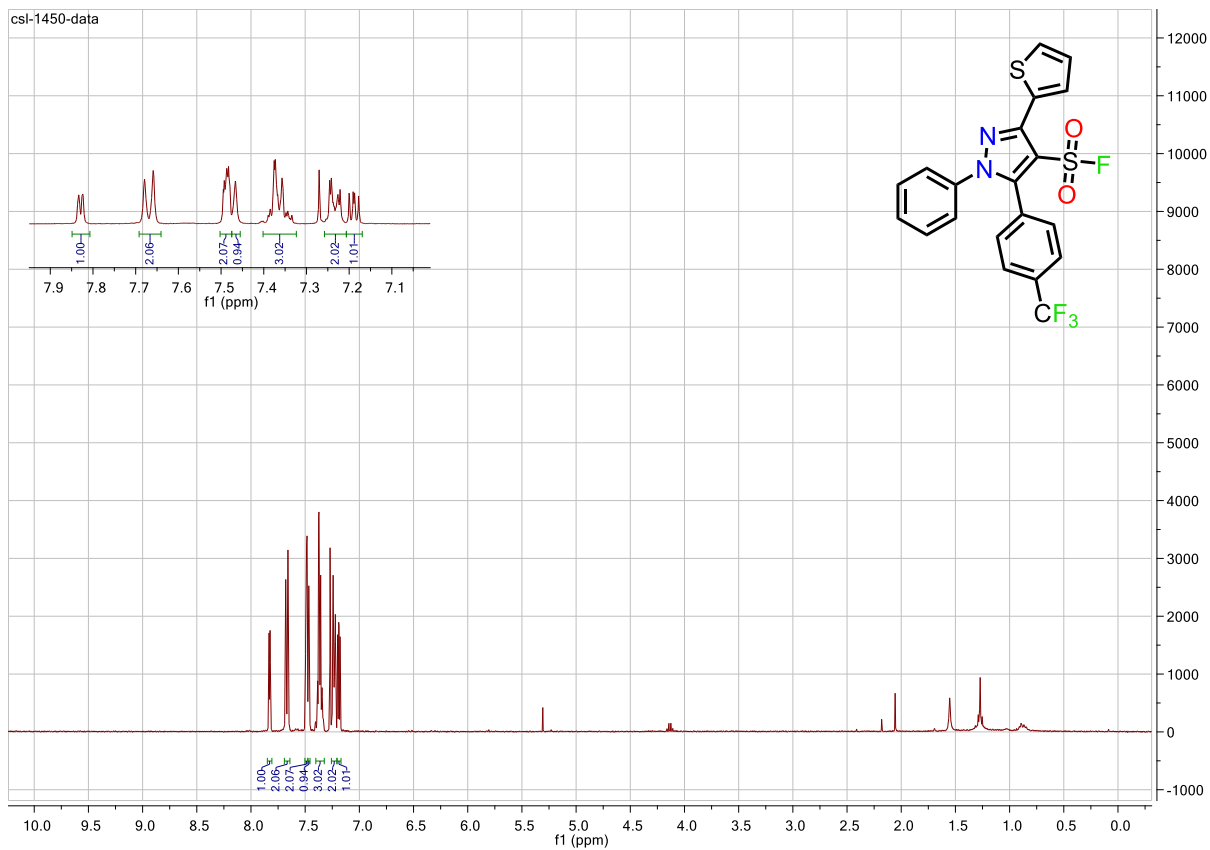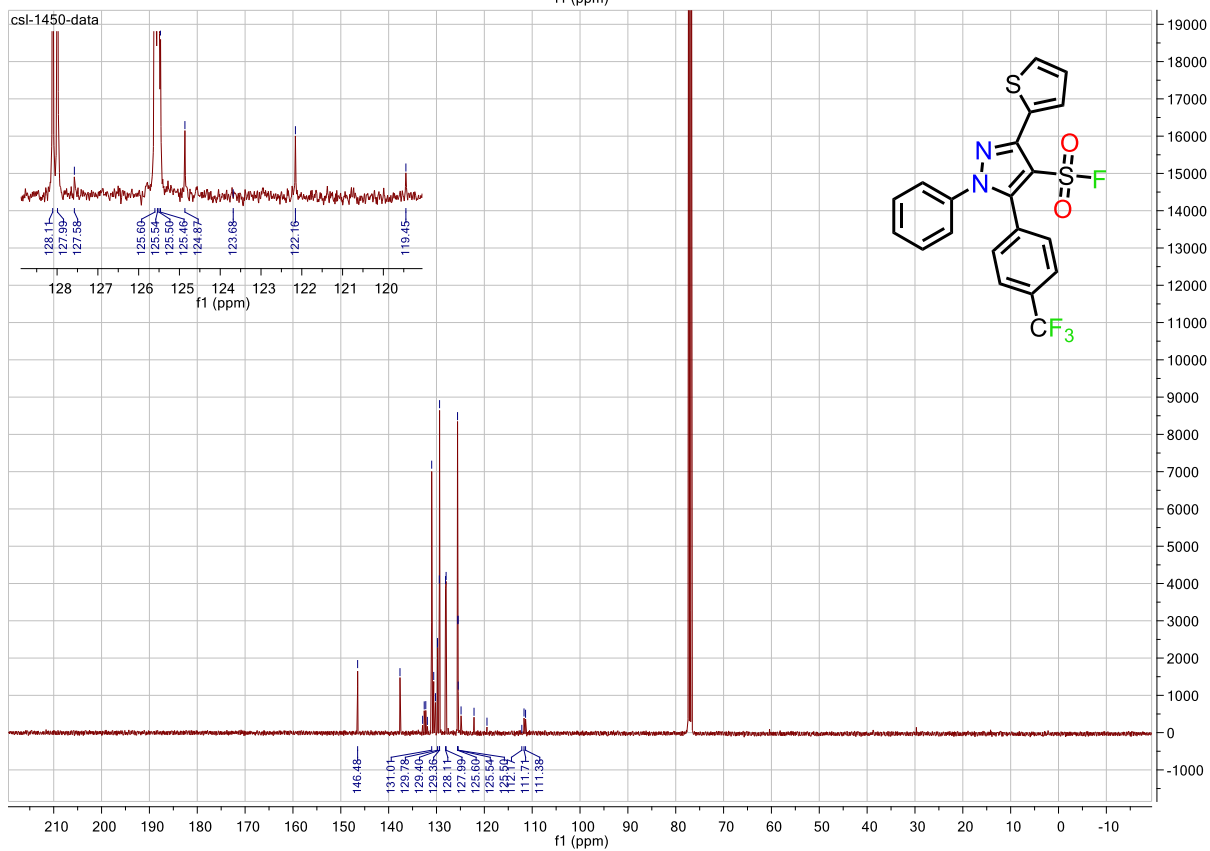



csi-1450-data

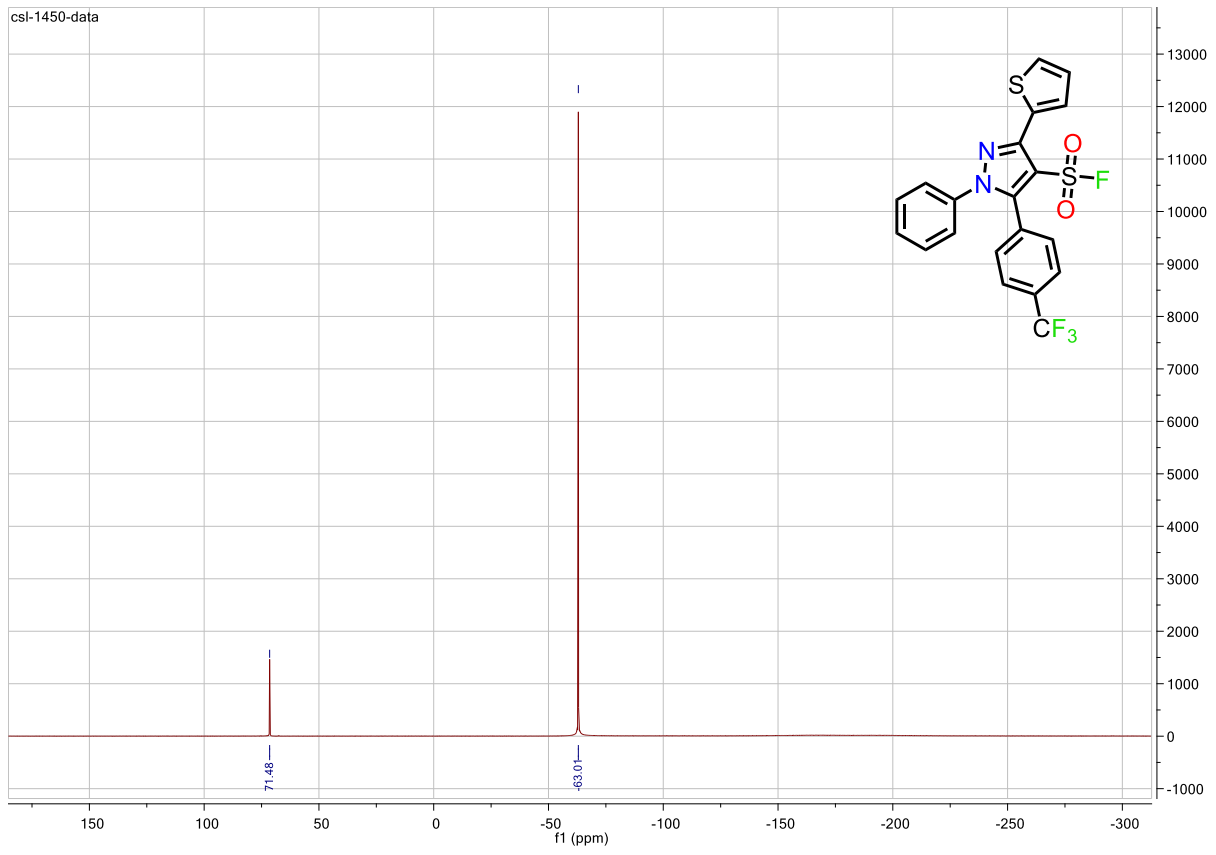

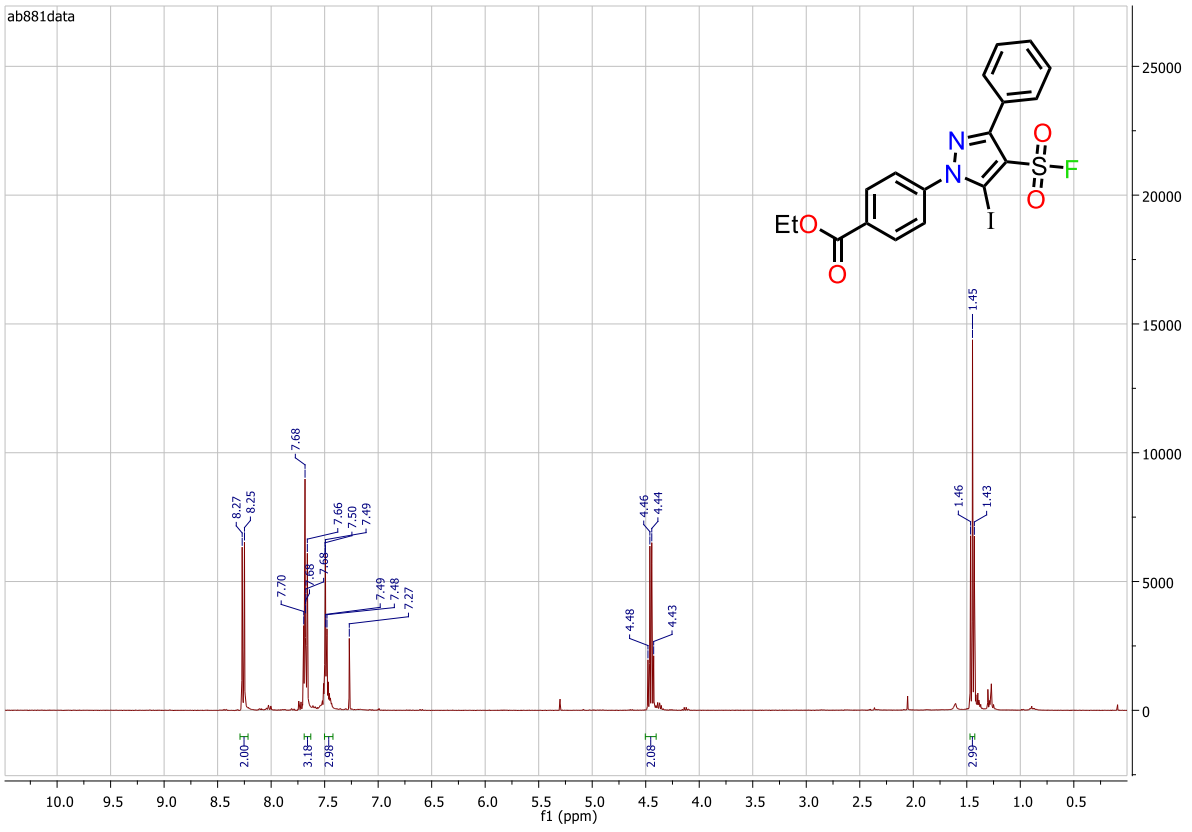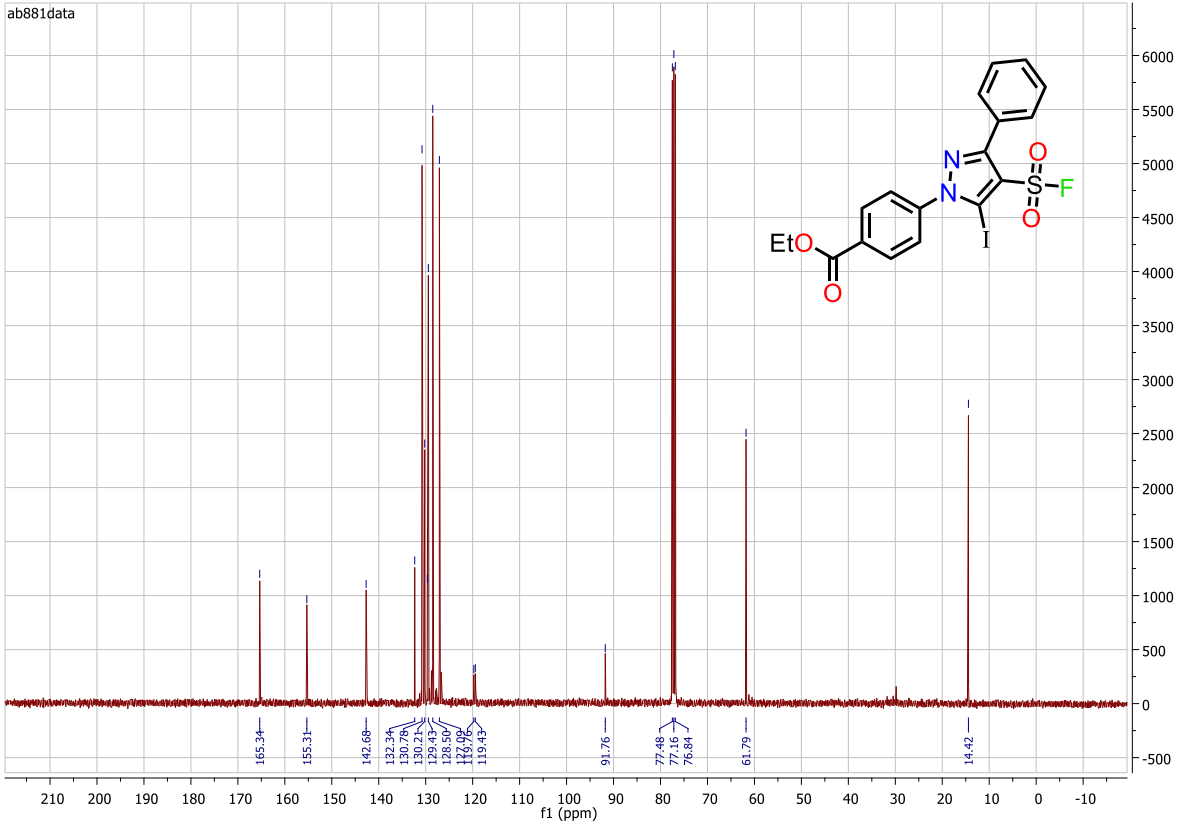

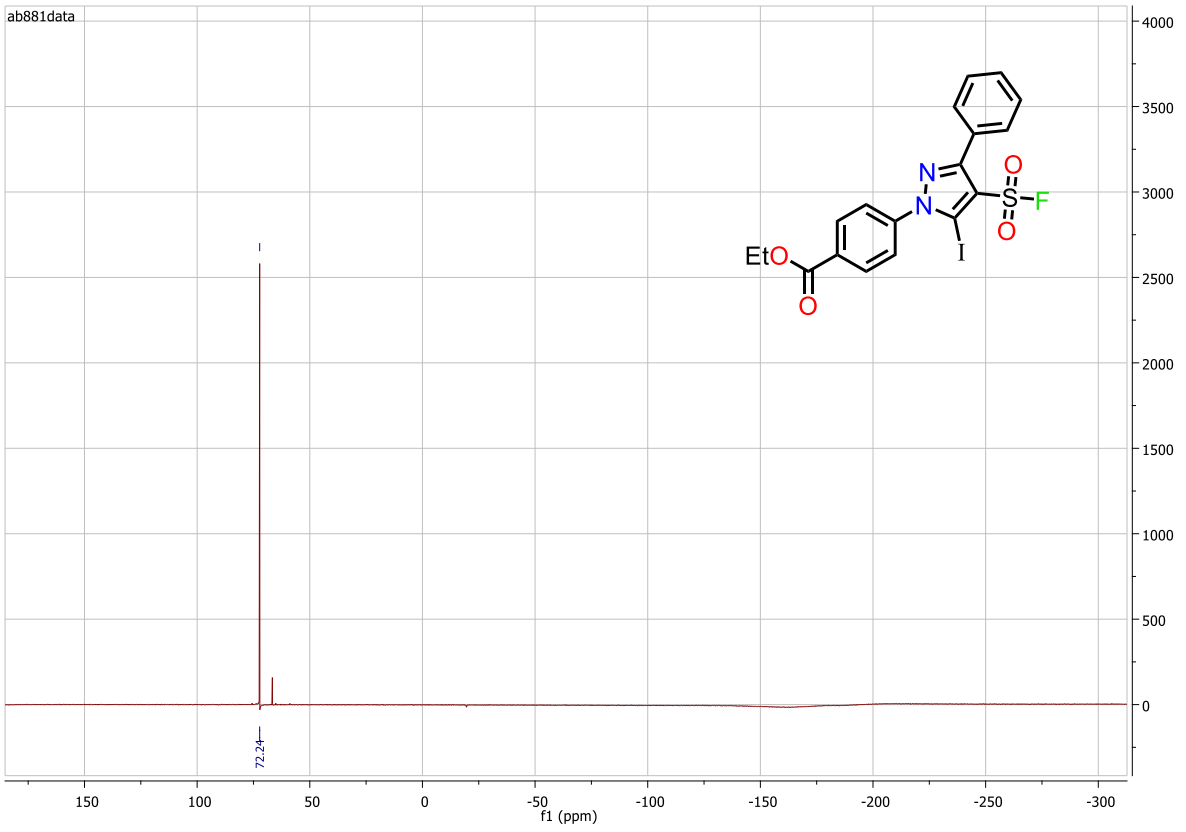

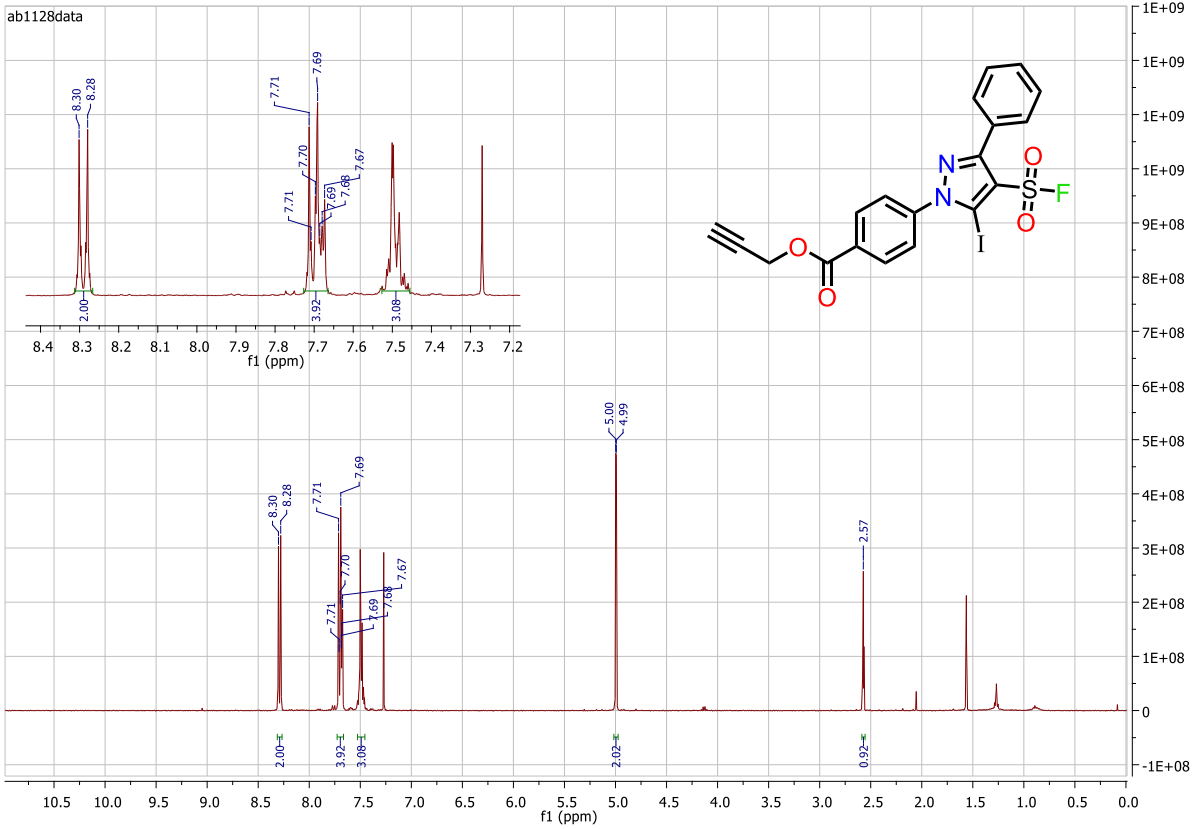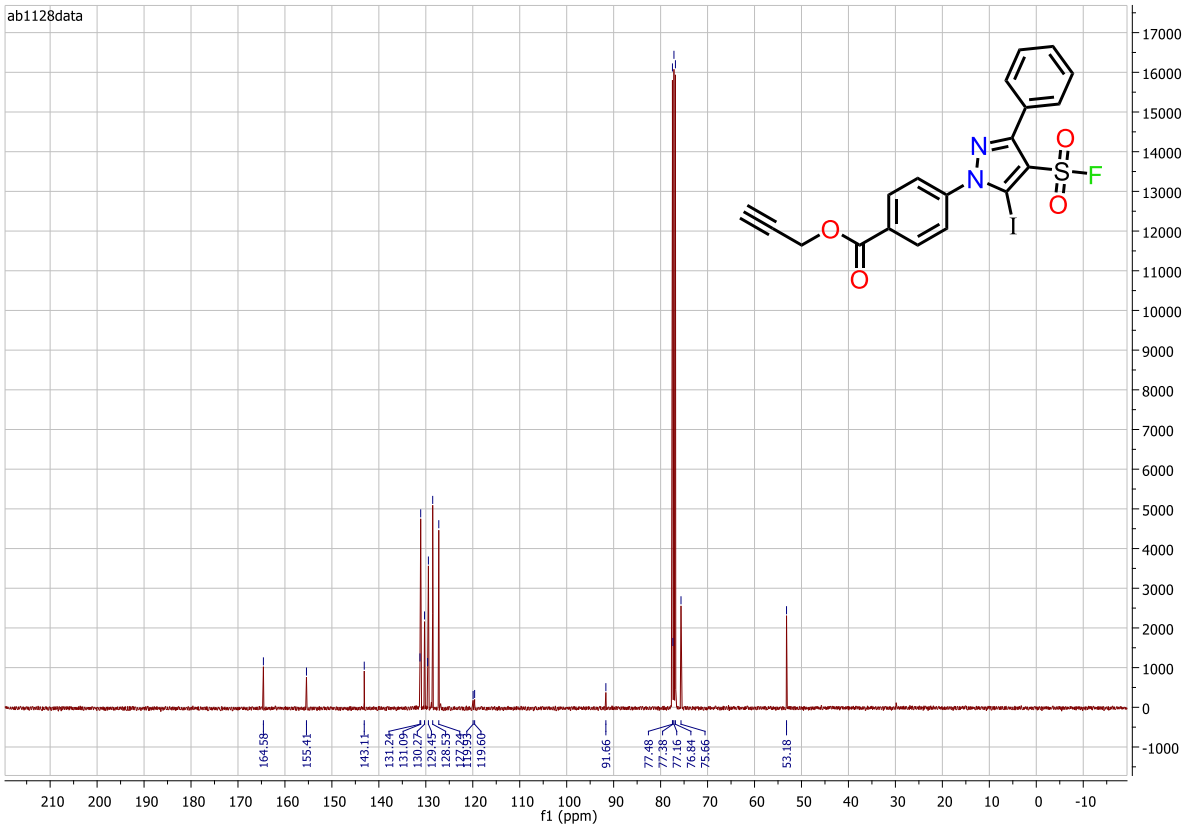

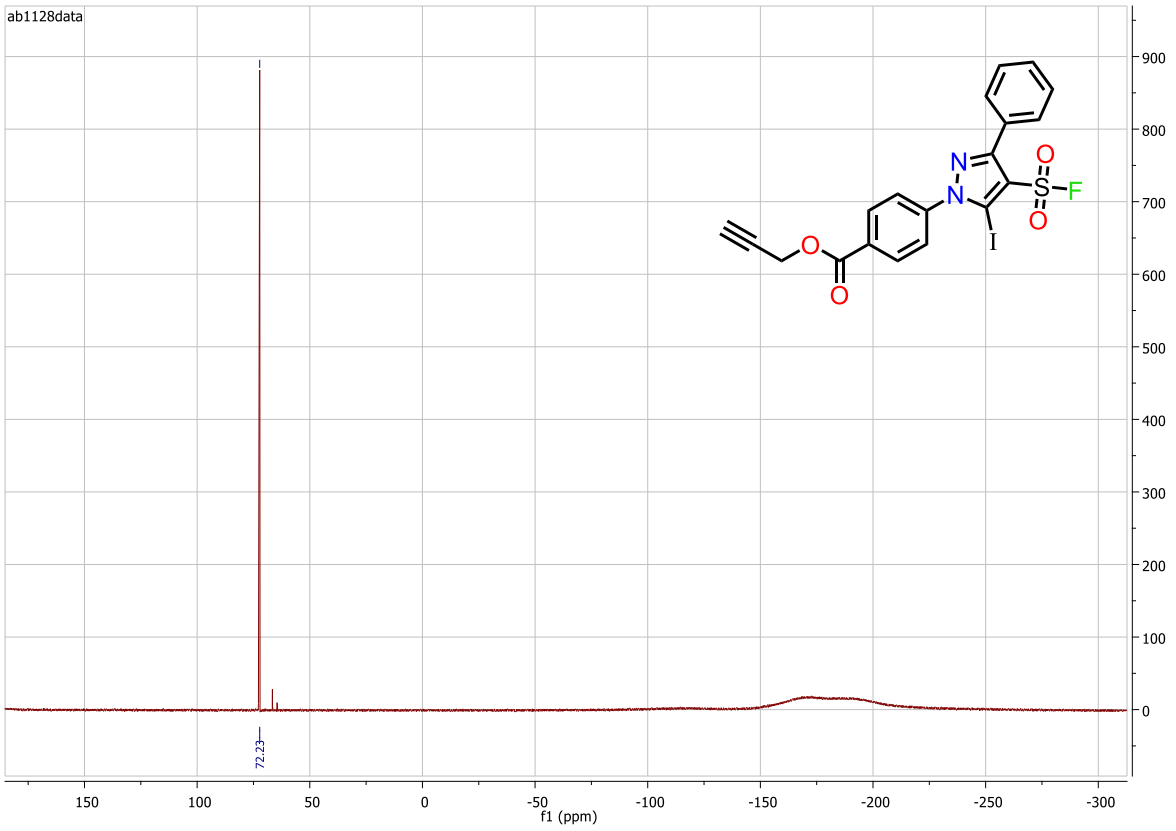

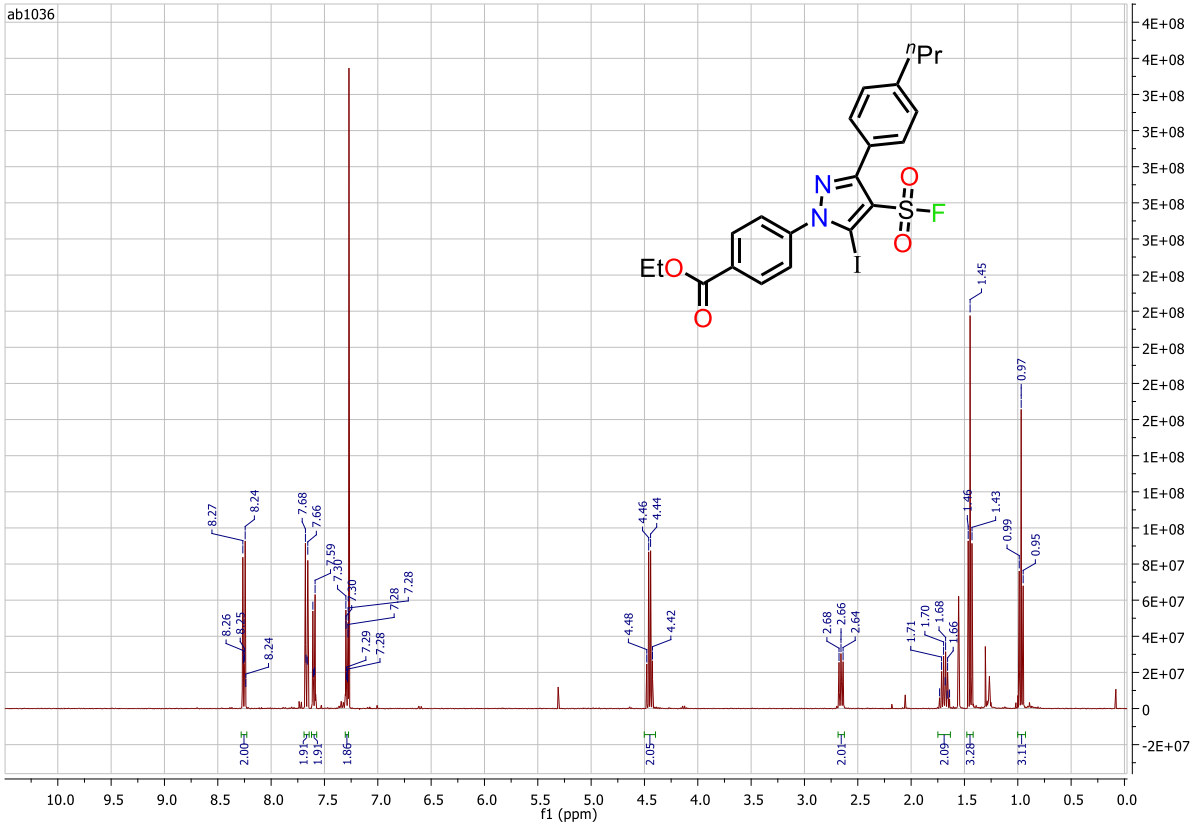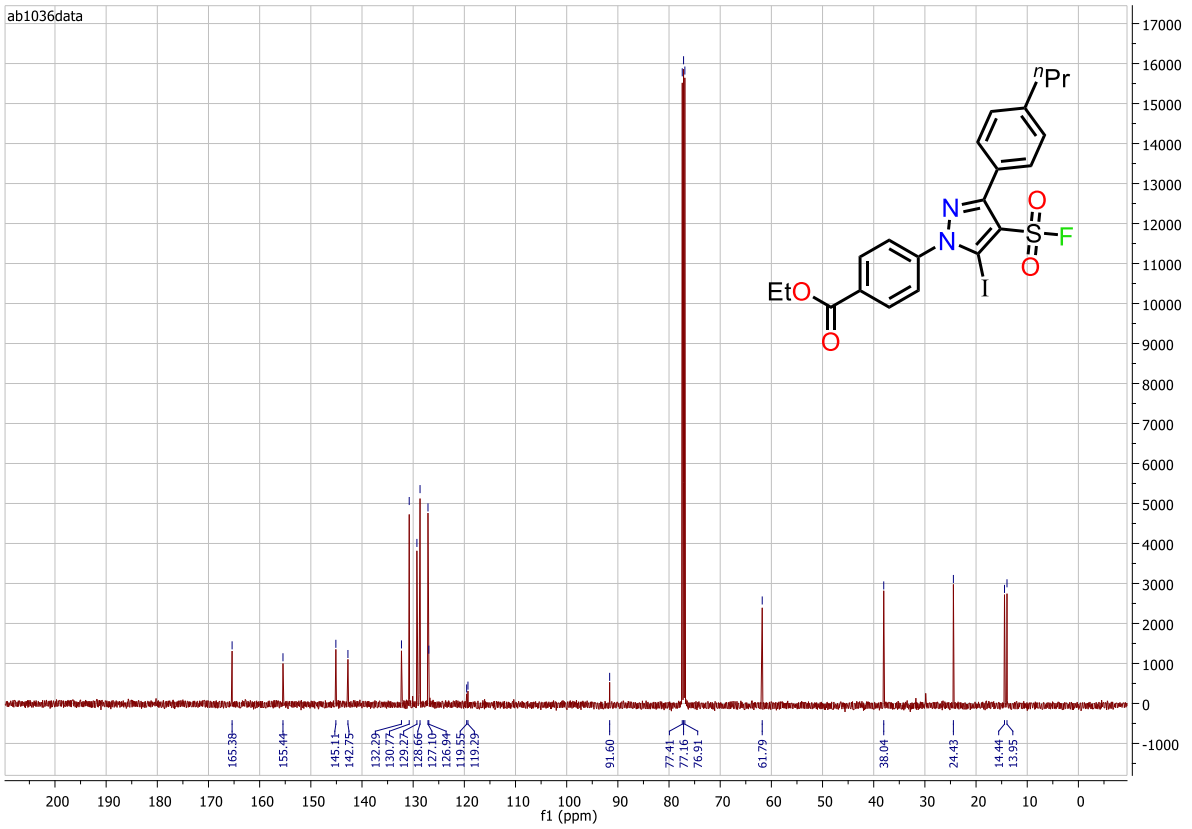

ab1036

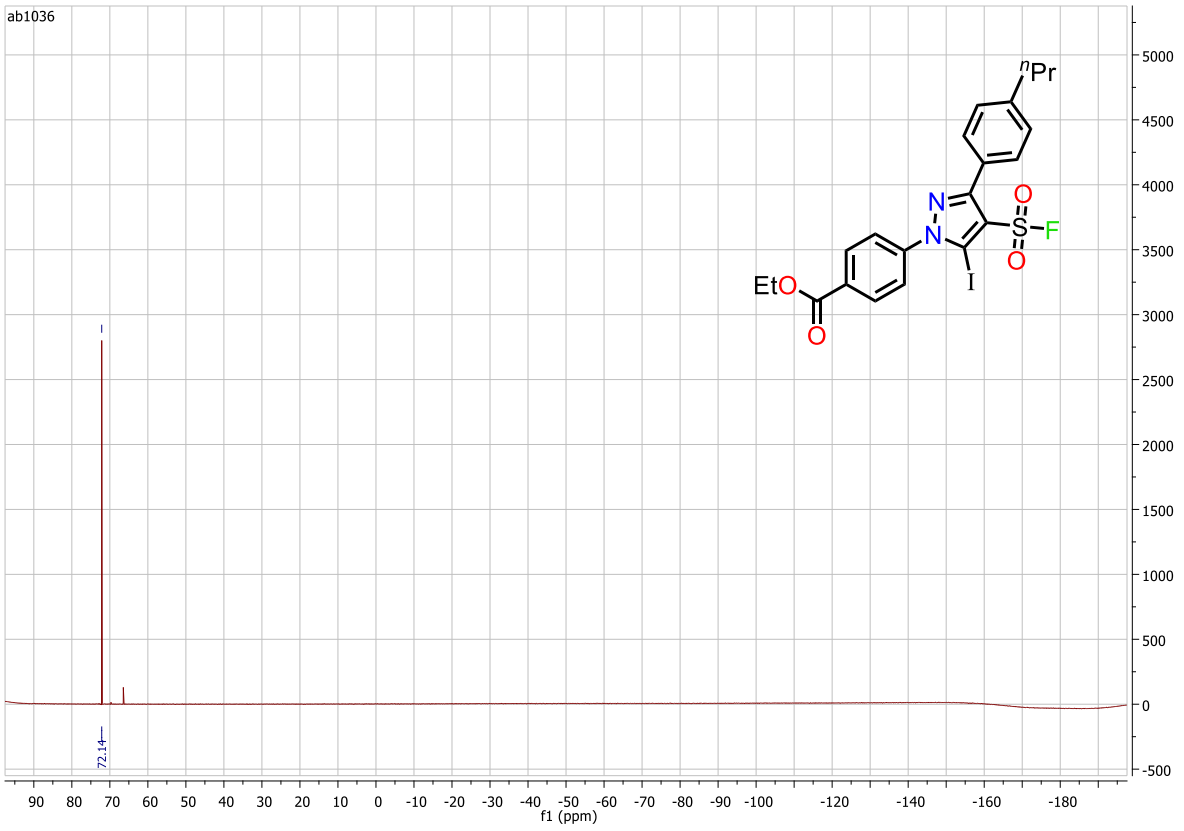

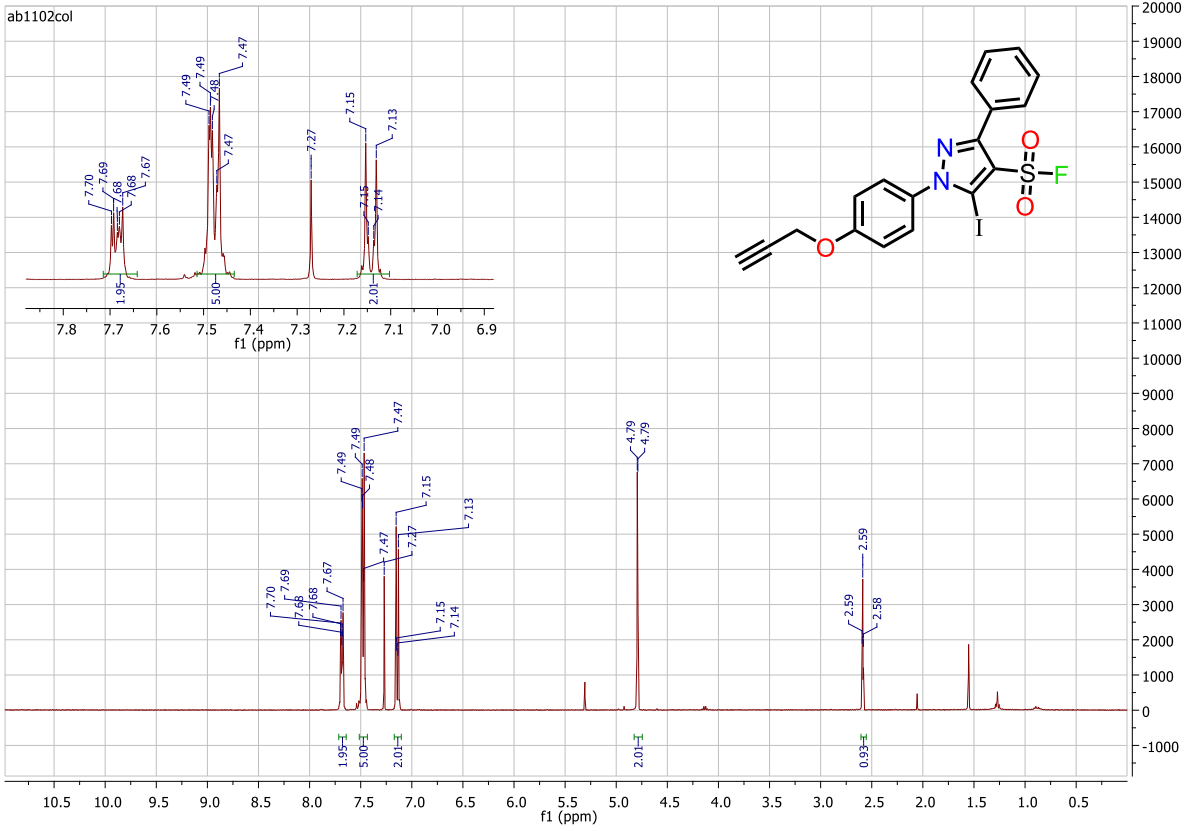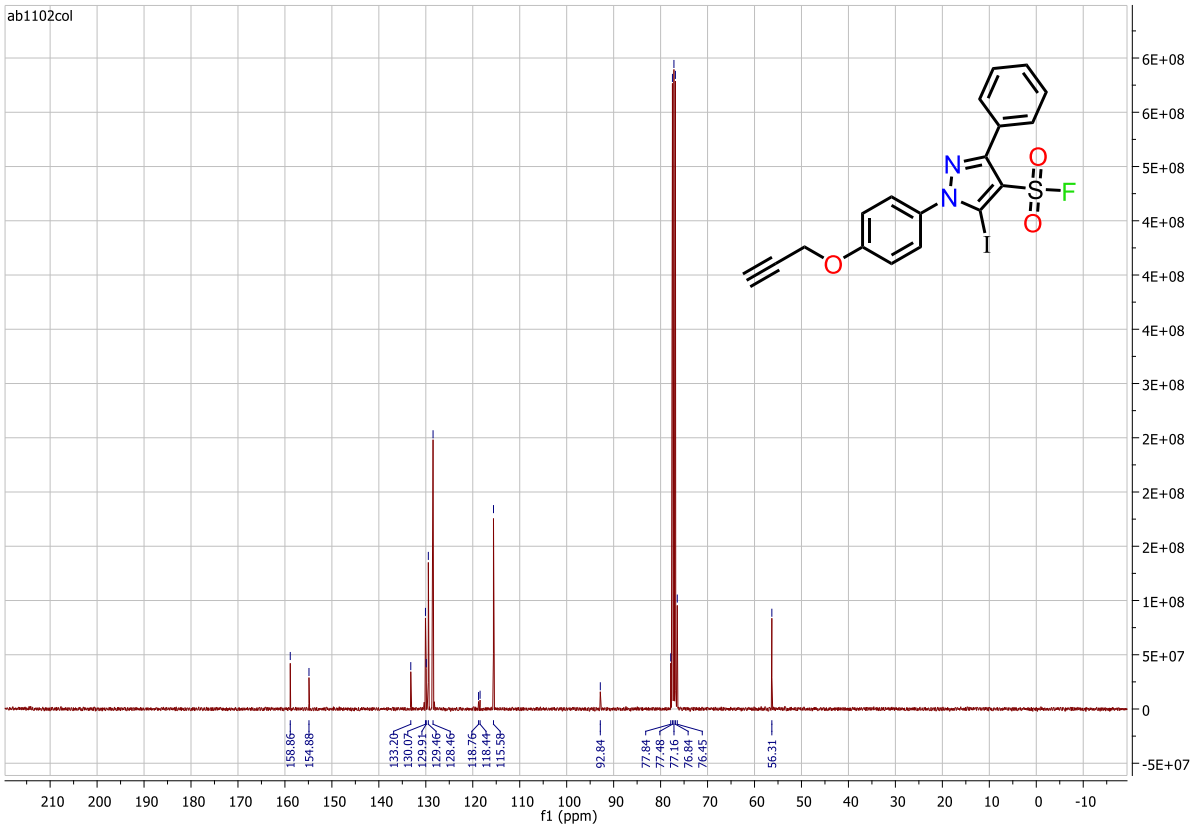



ab1102col

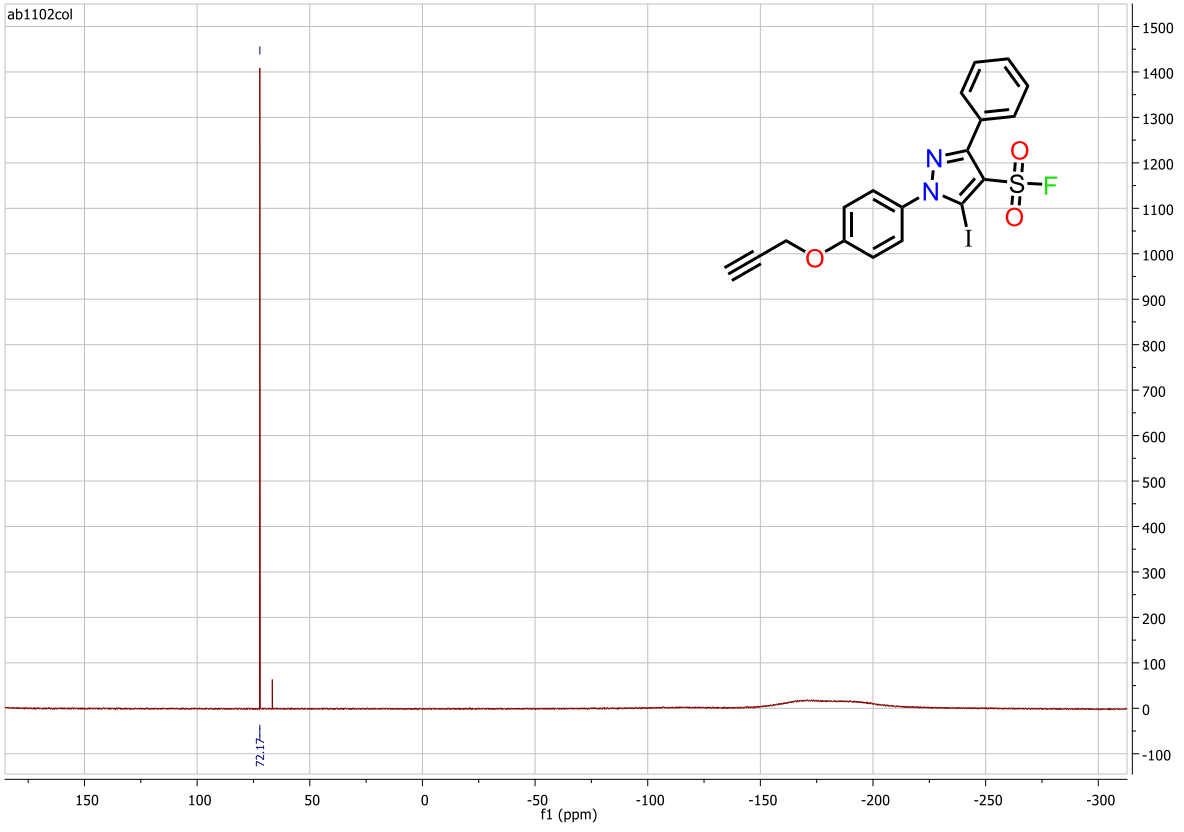

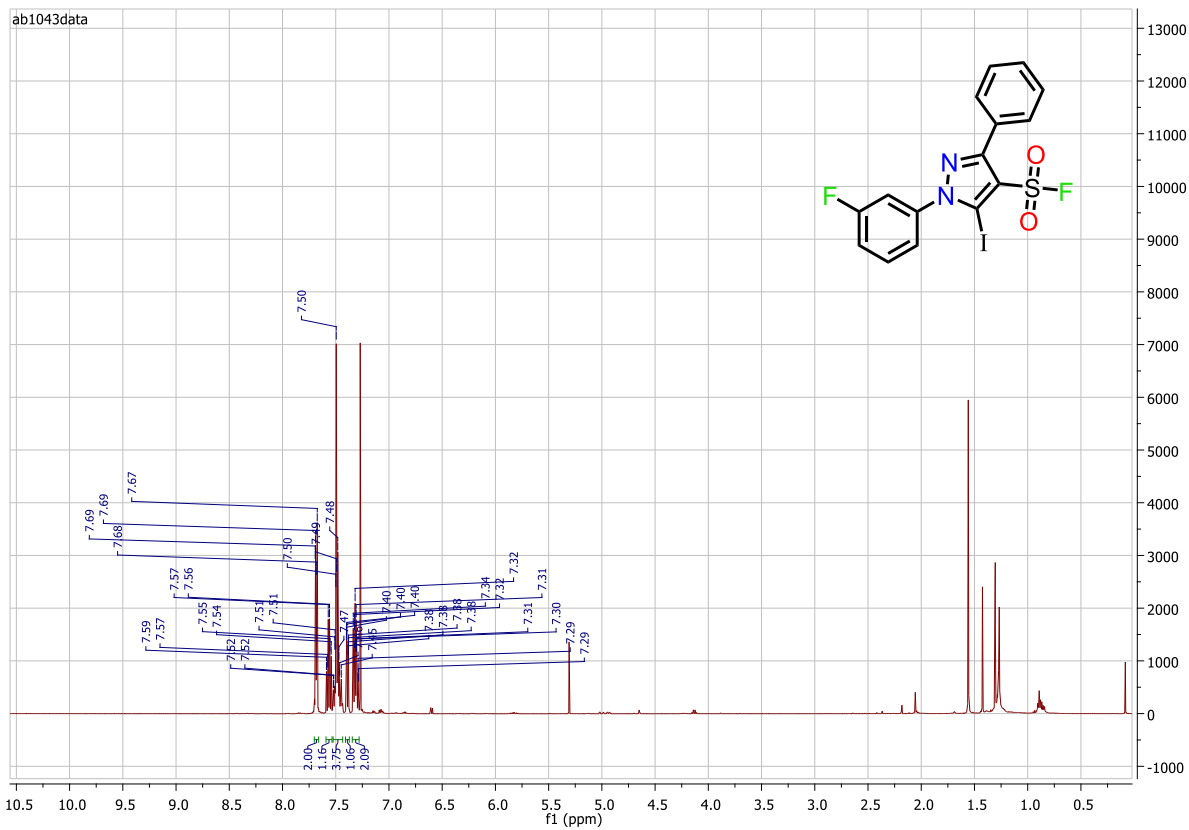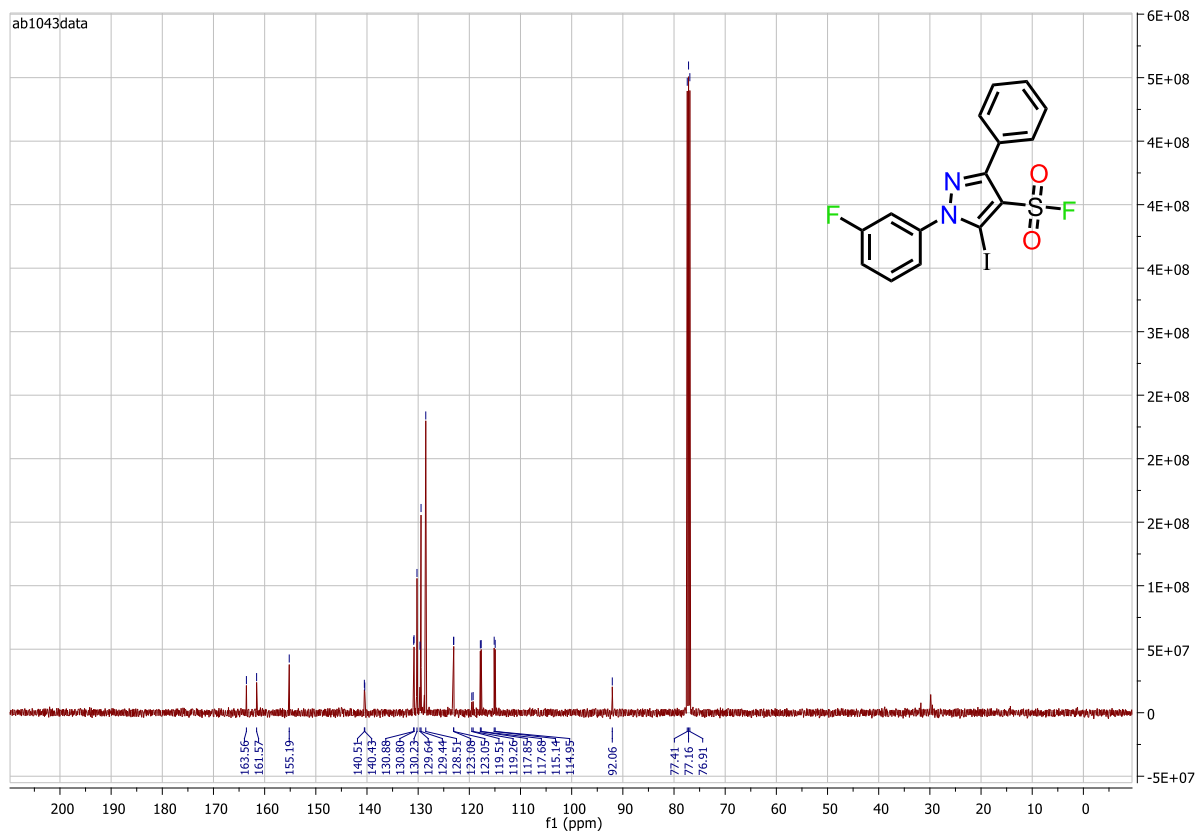

ab1043

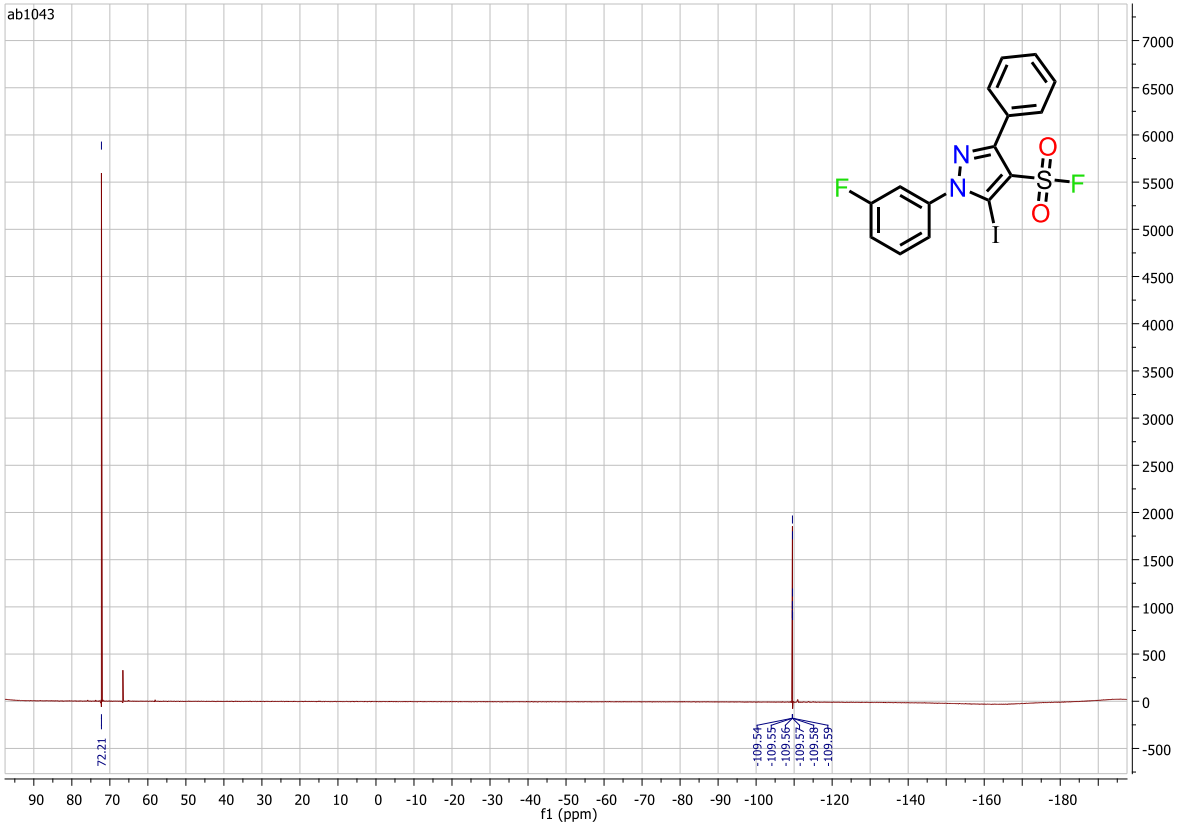

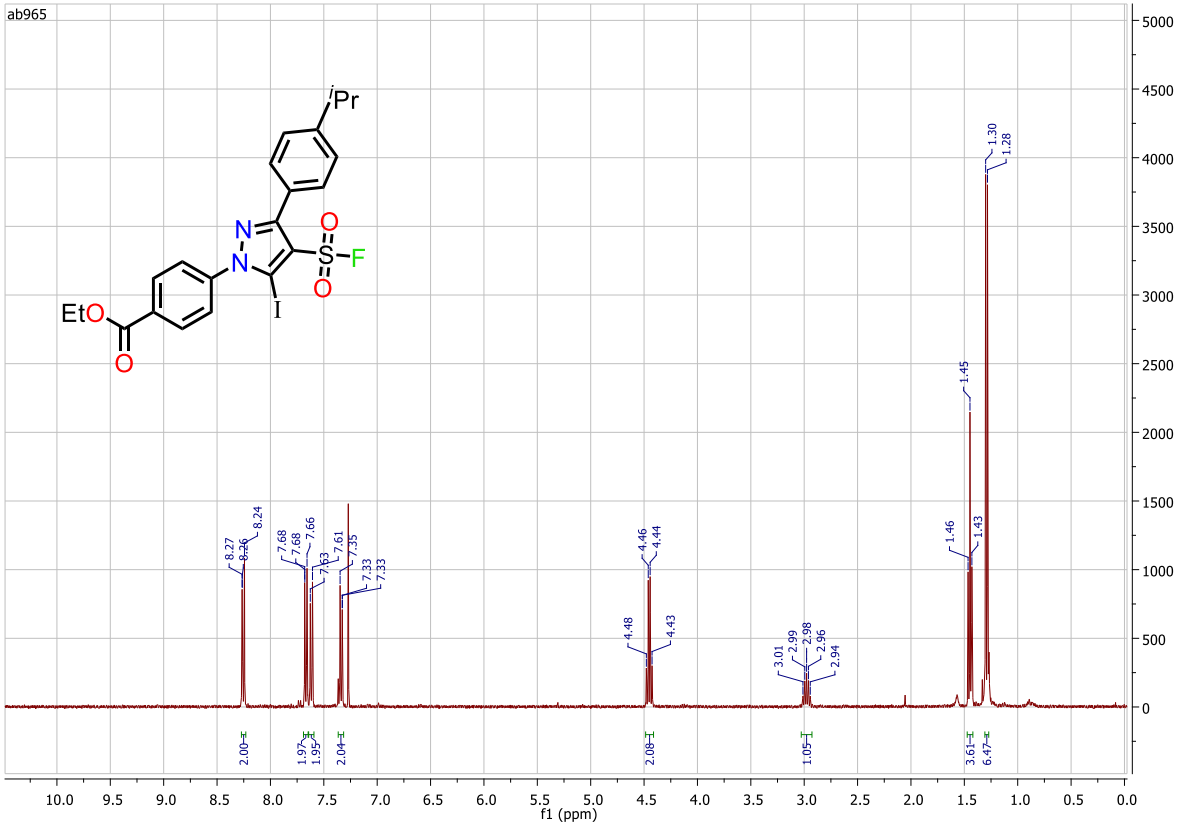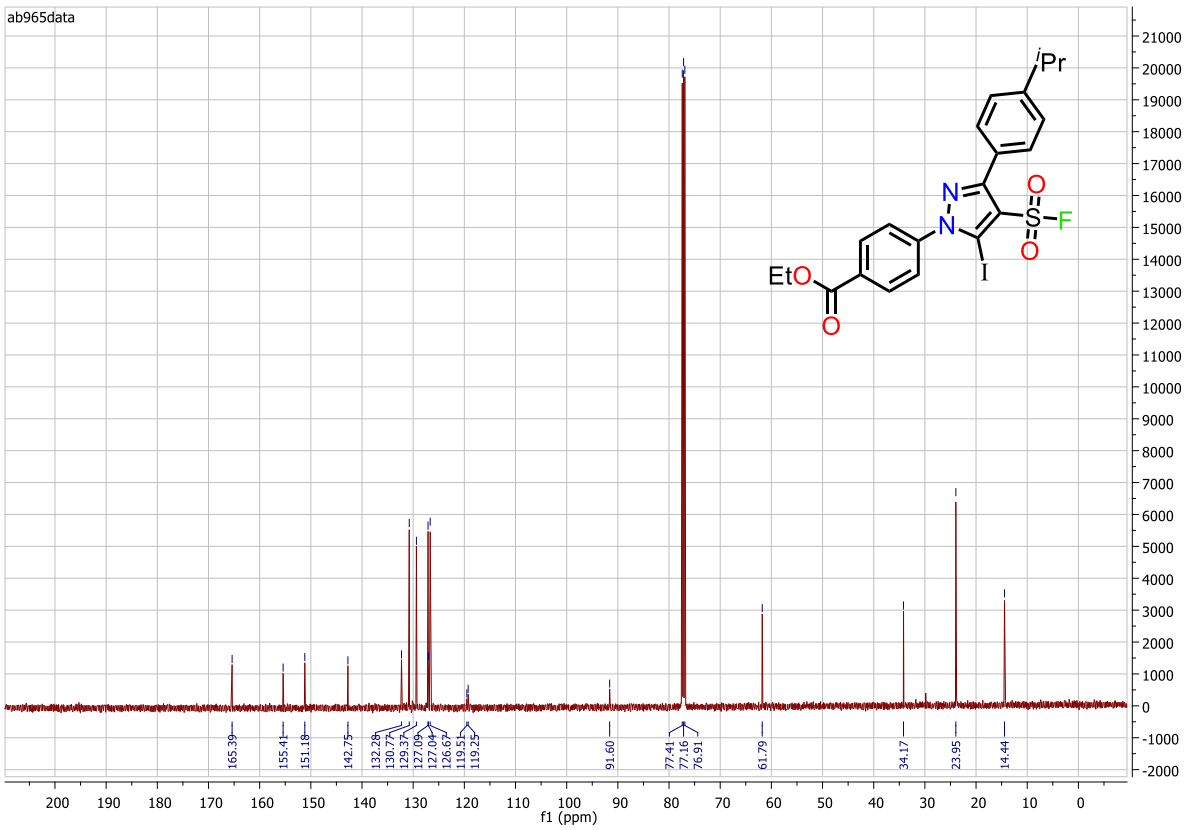

ab965

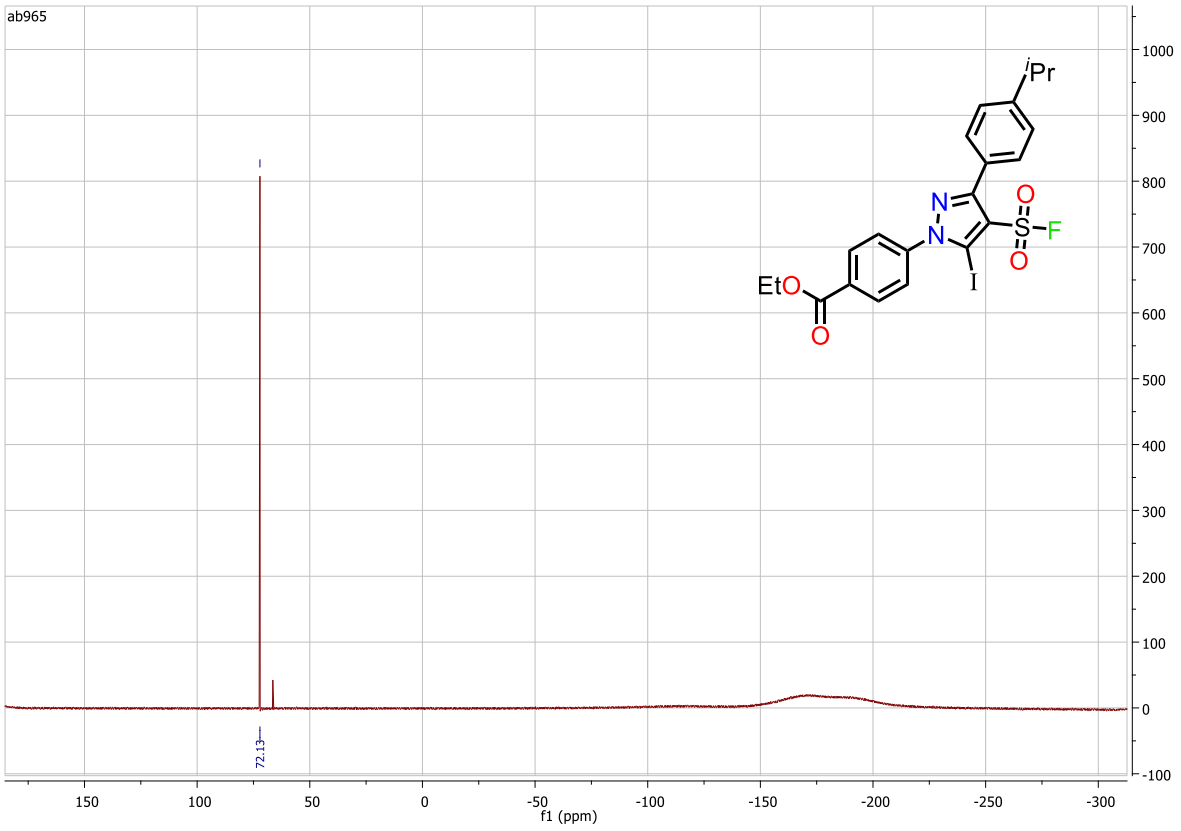

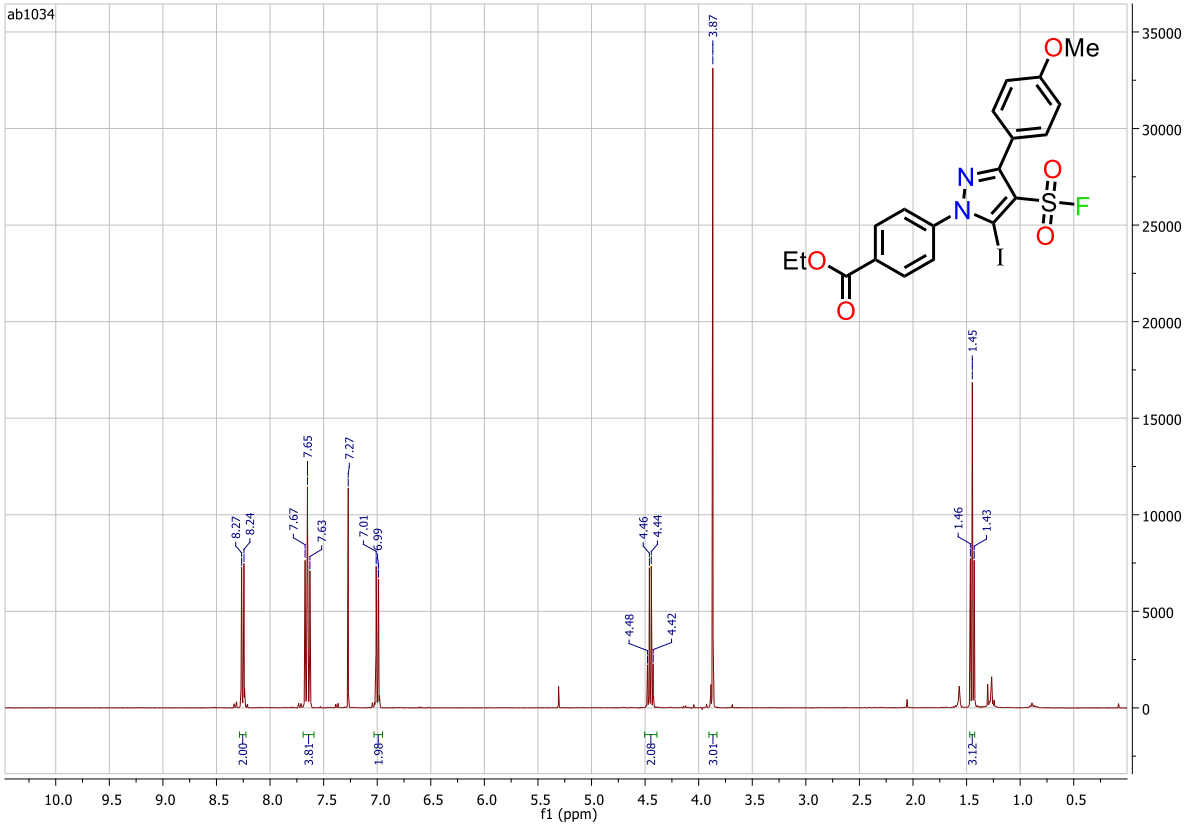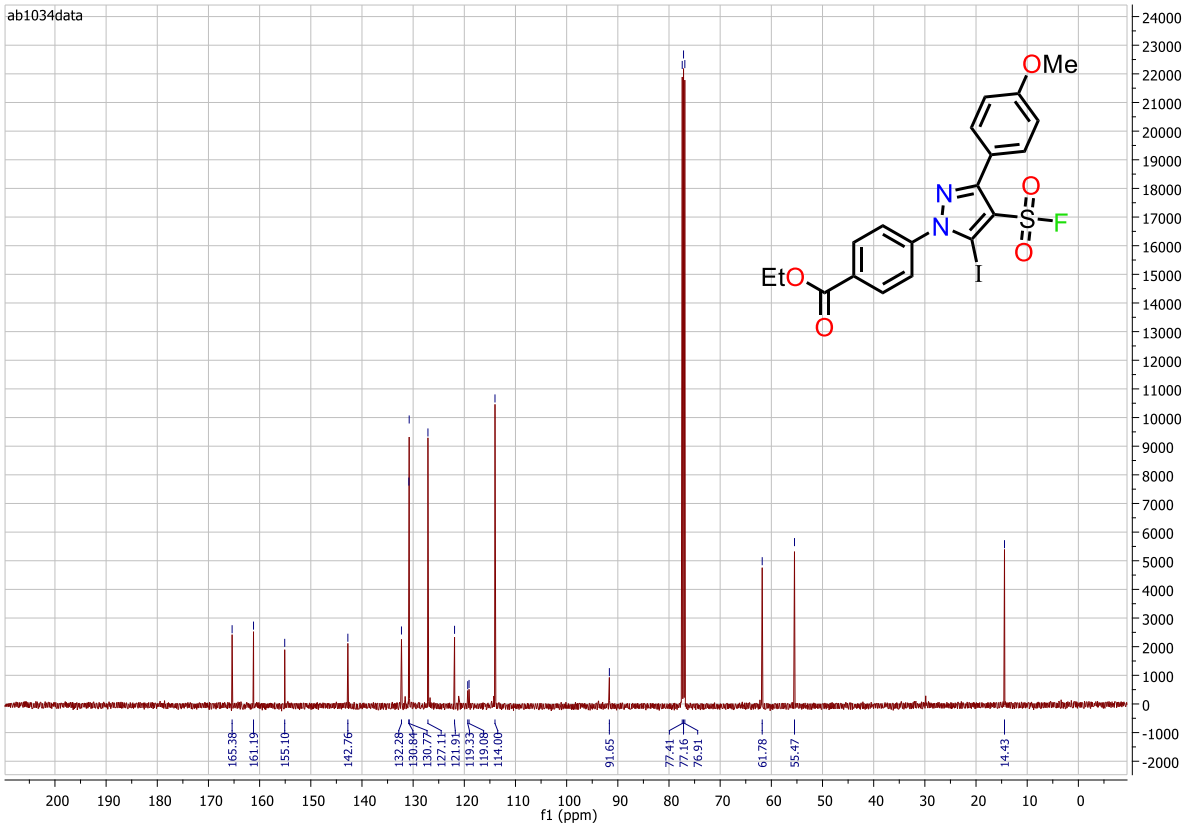

ab1034

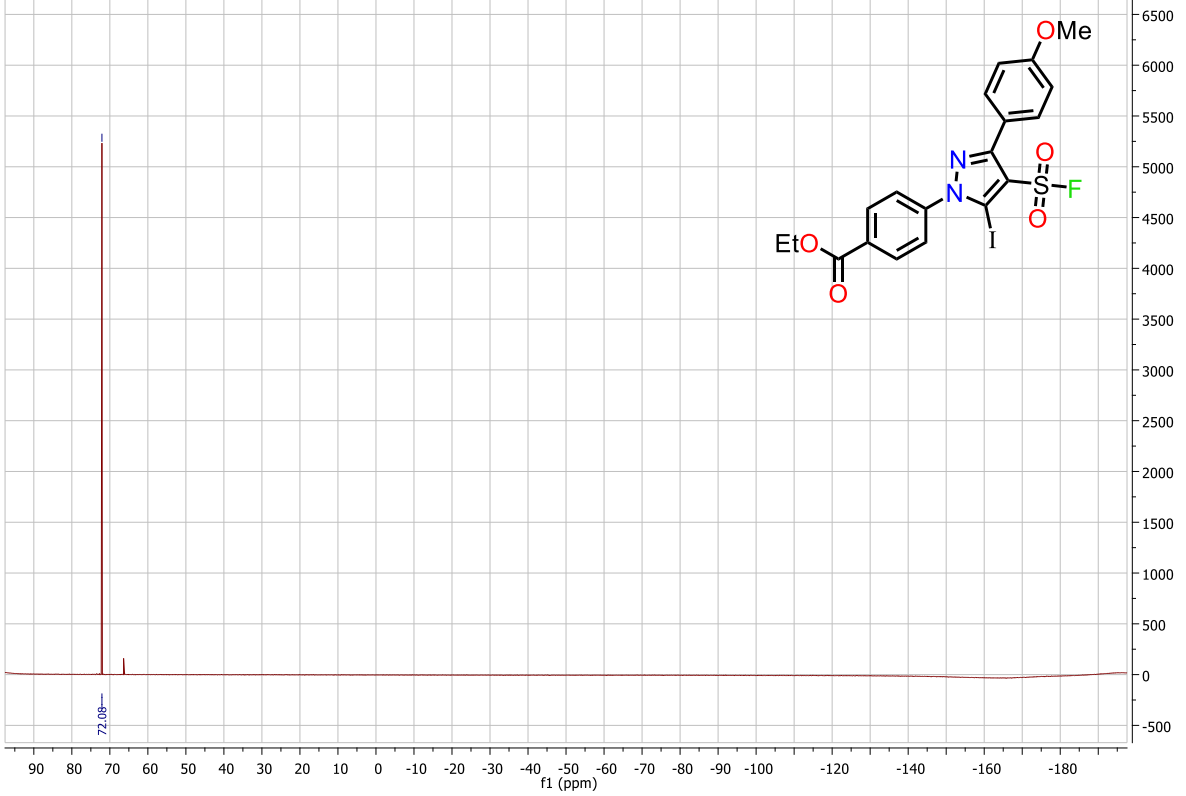

ab964data

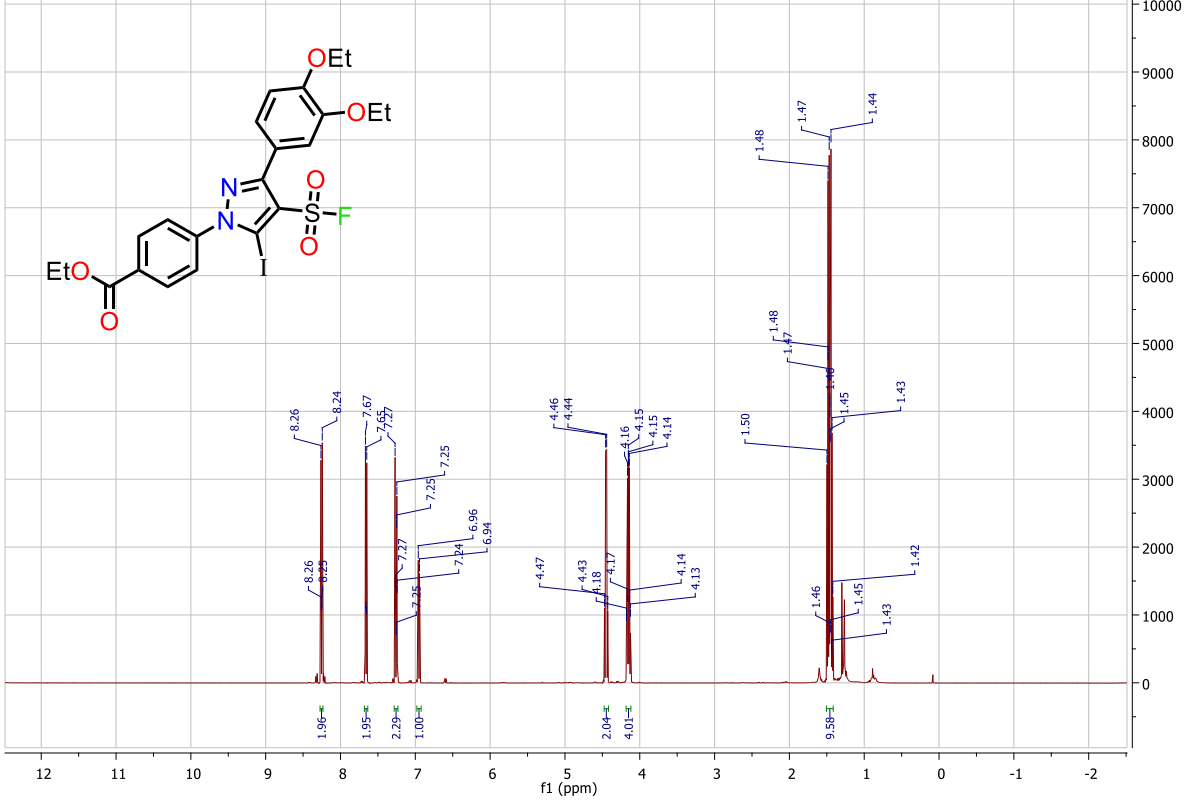

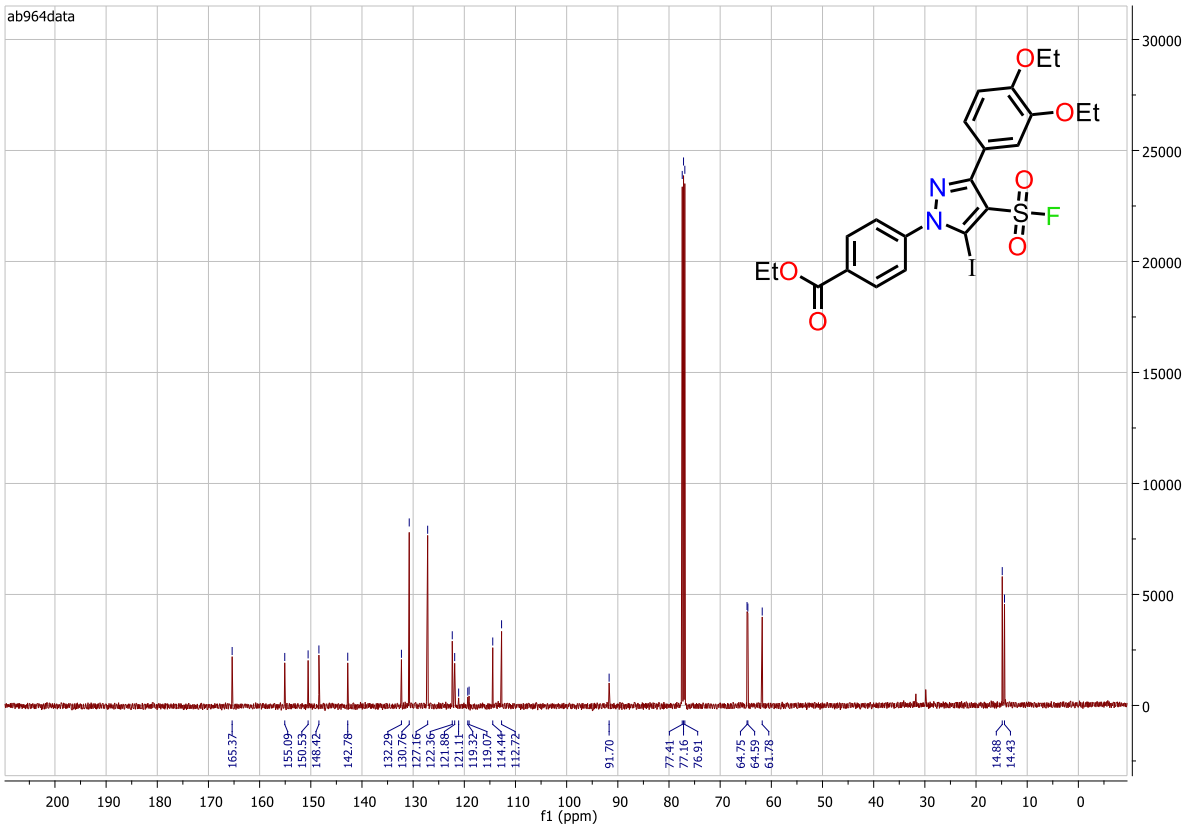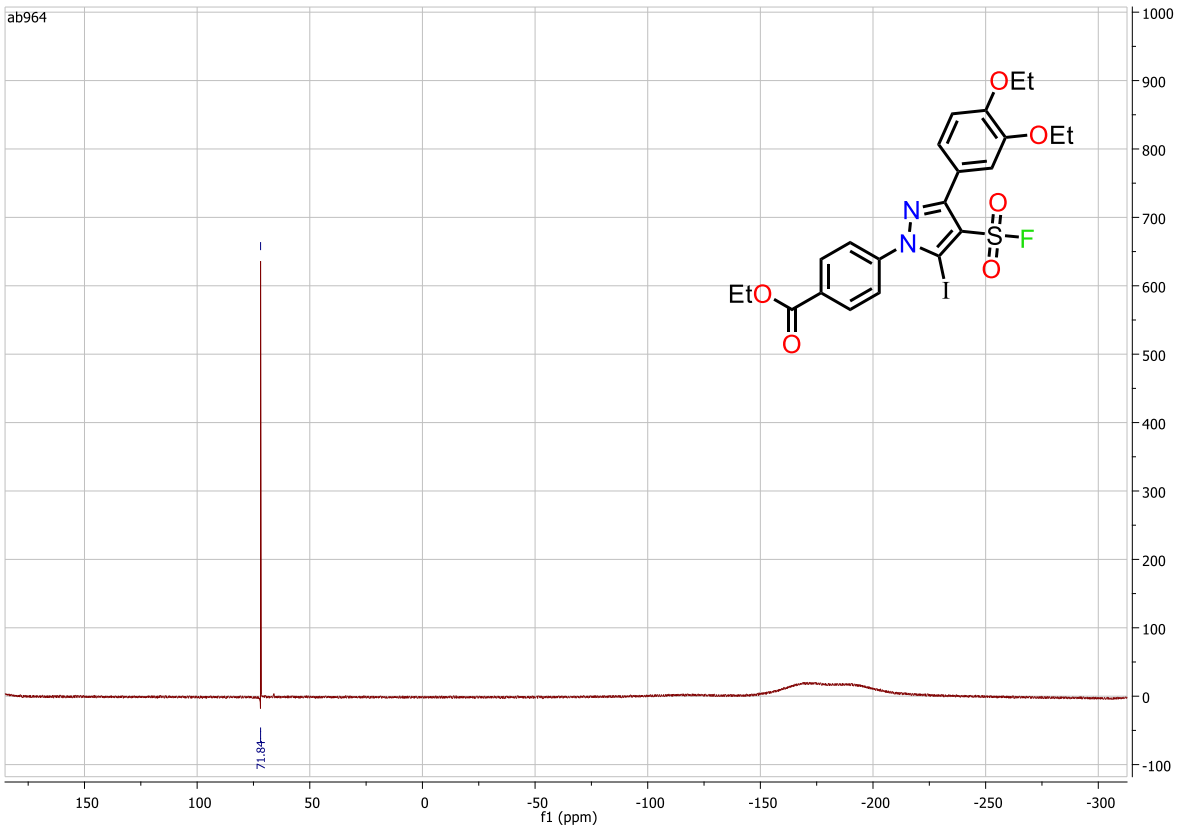



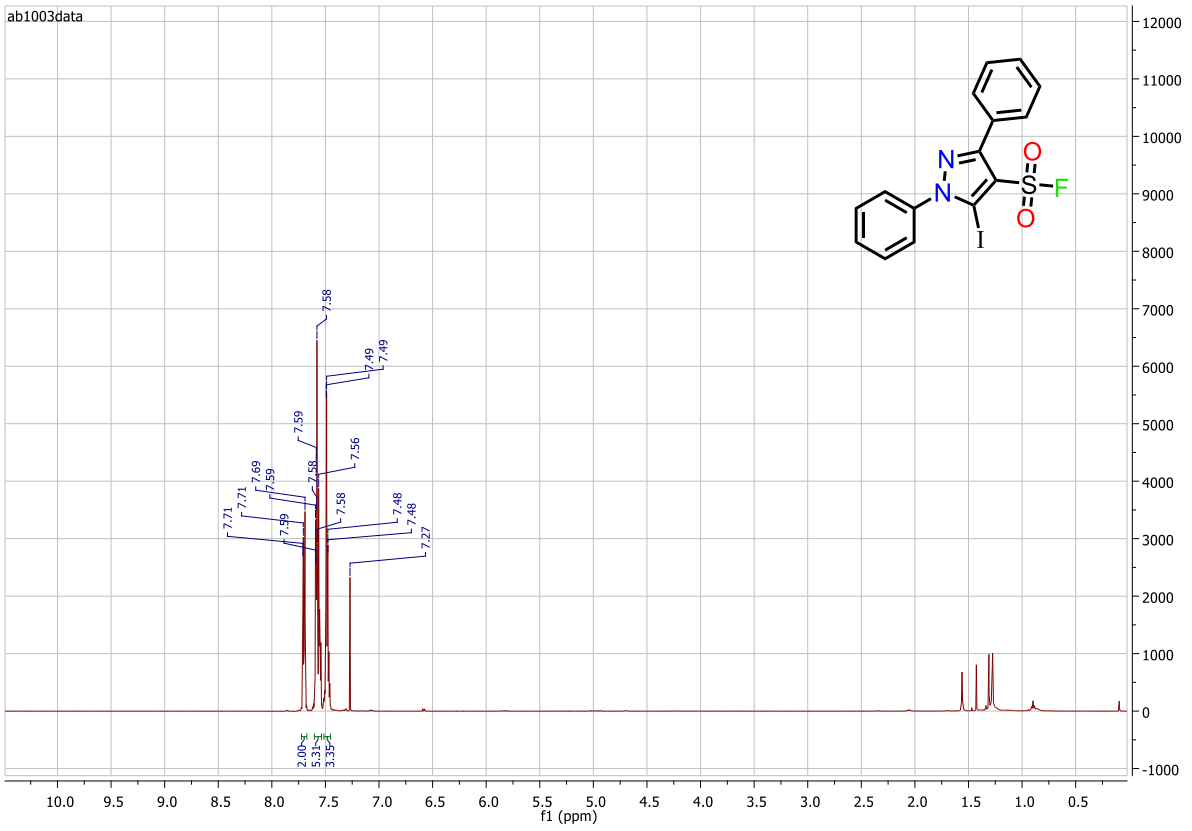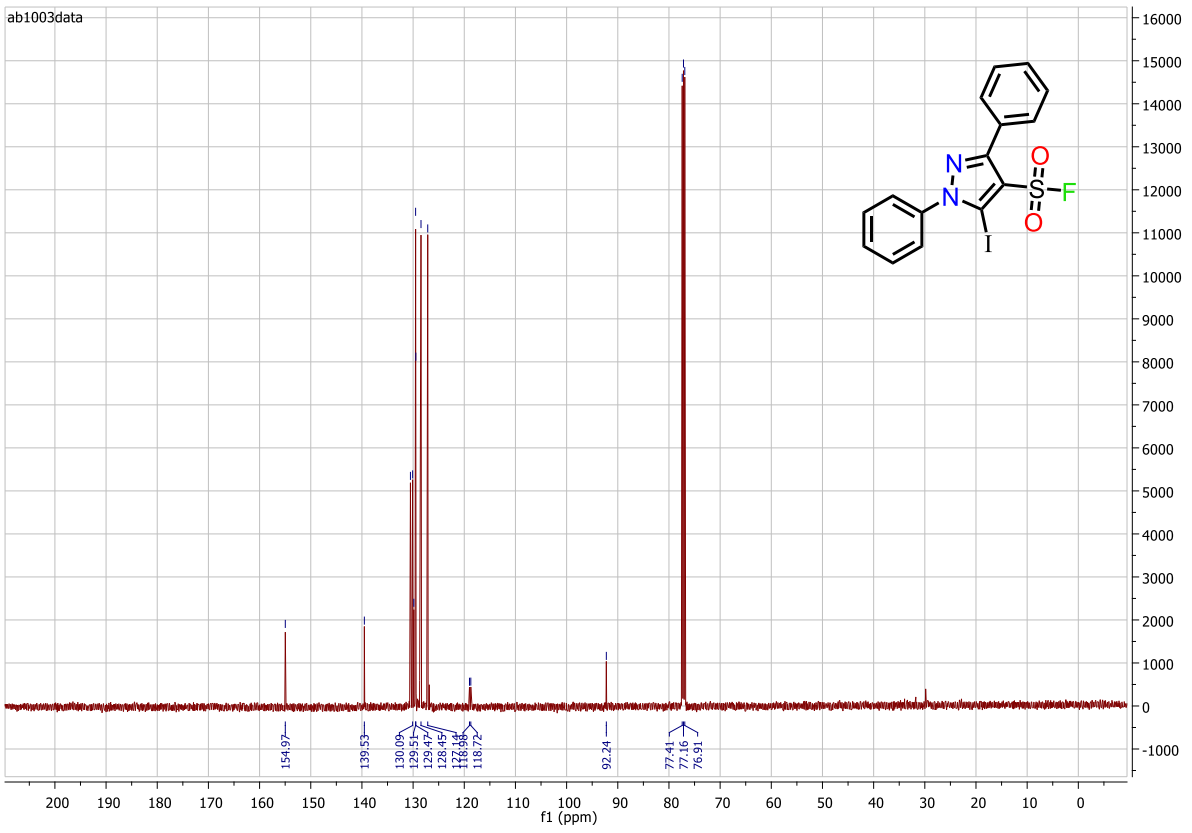

ab1003data

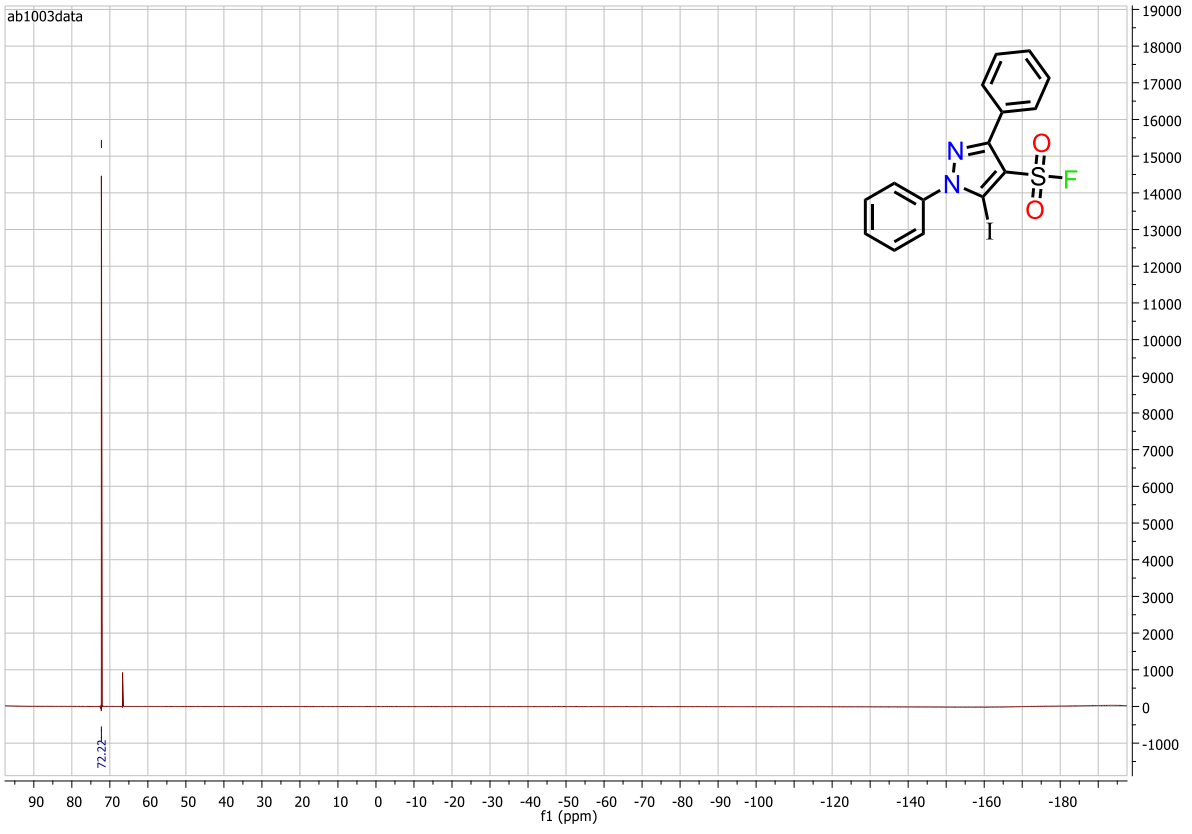

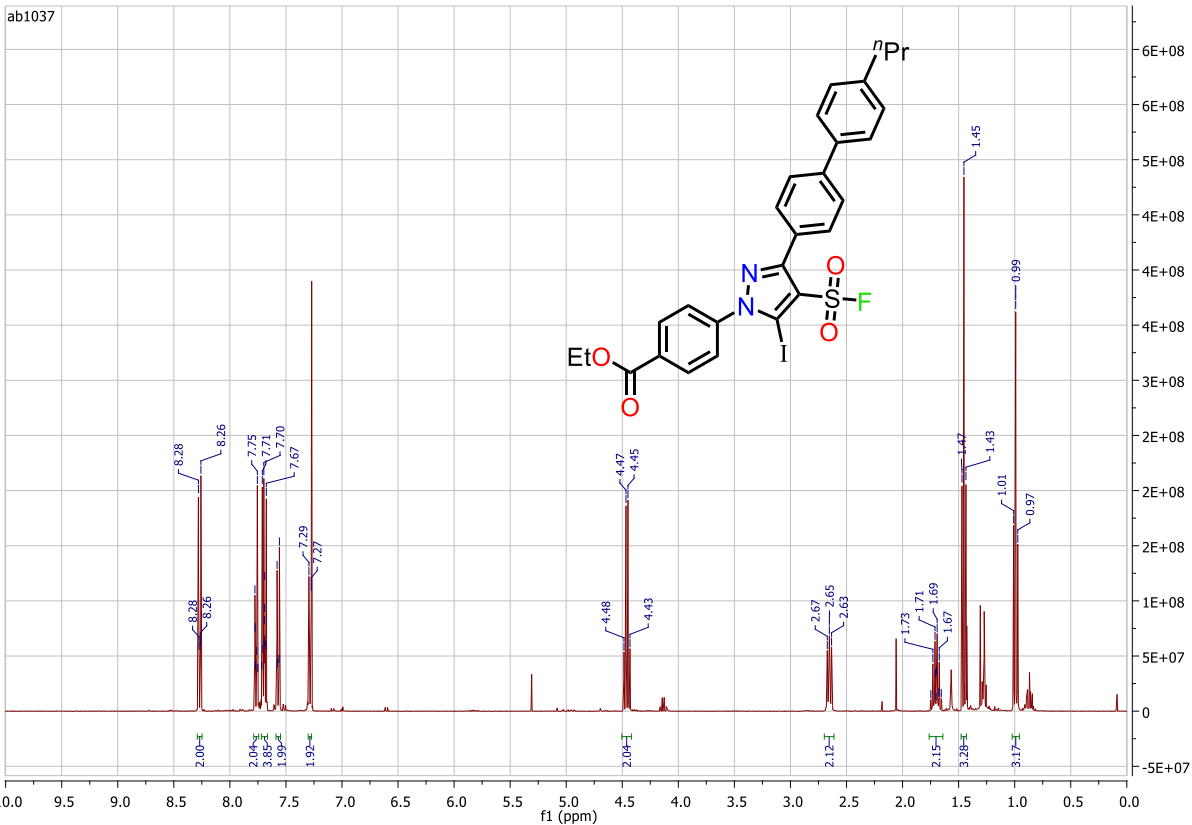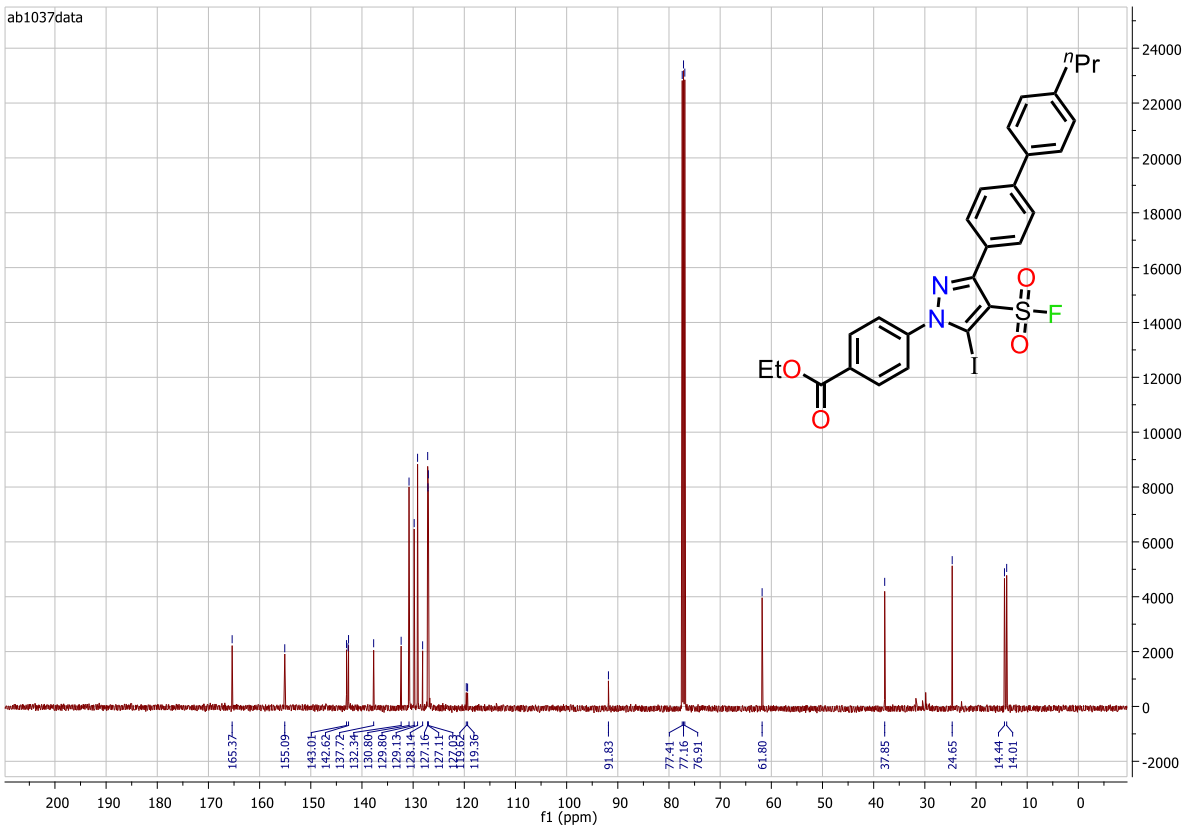

ab1037

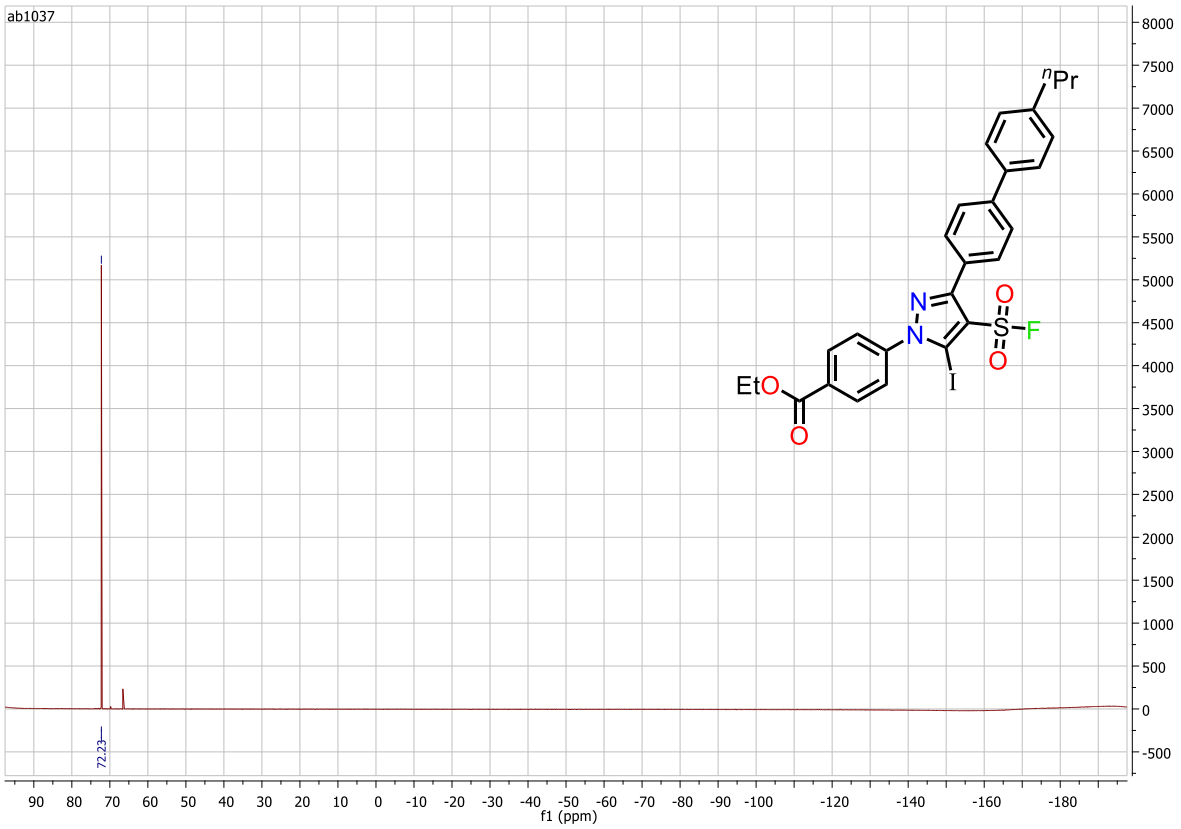

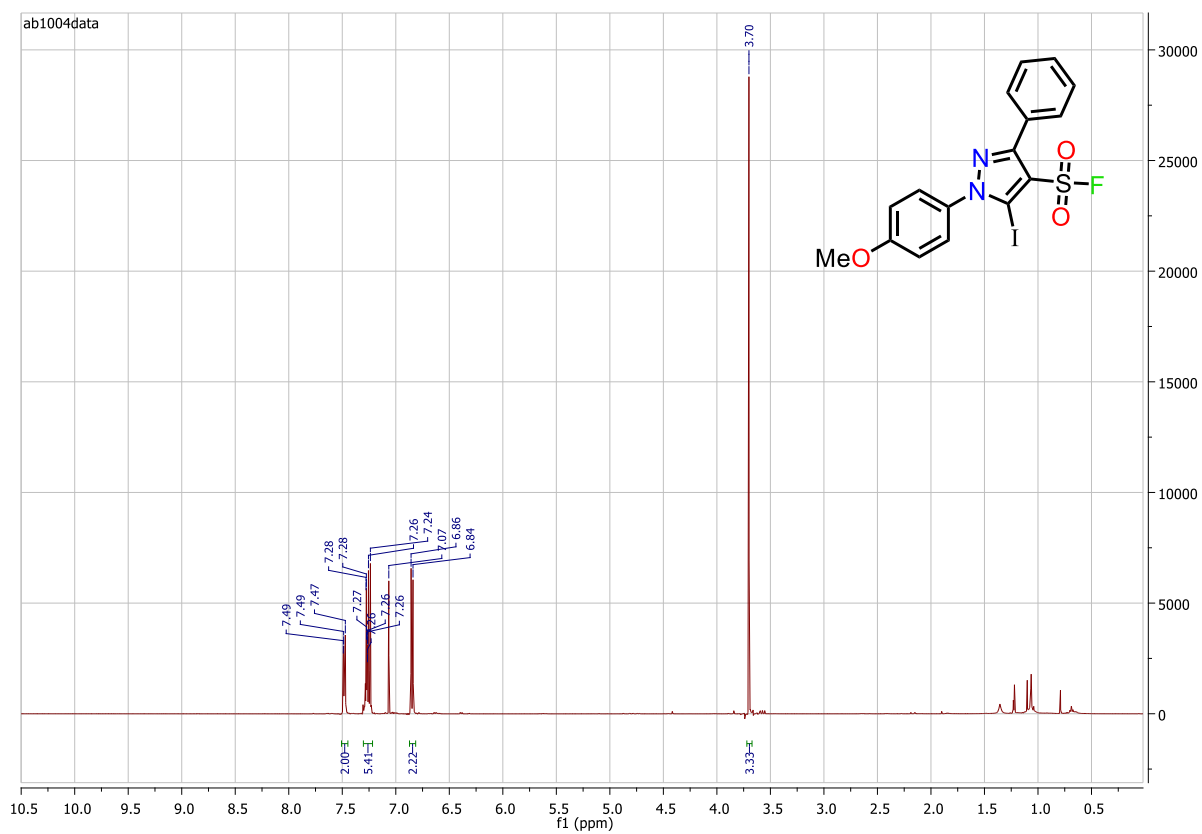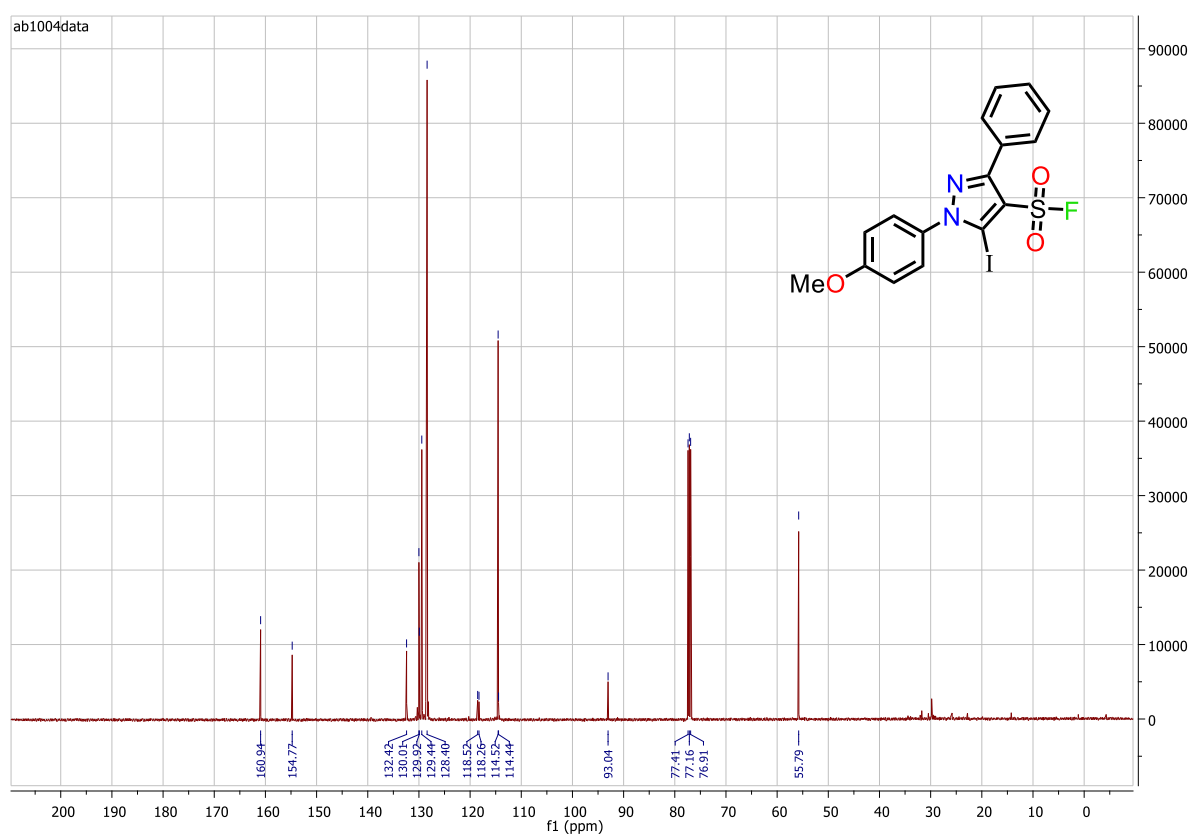

ab1004data

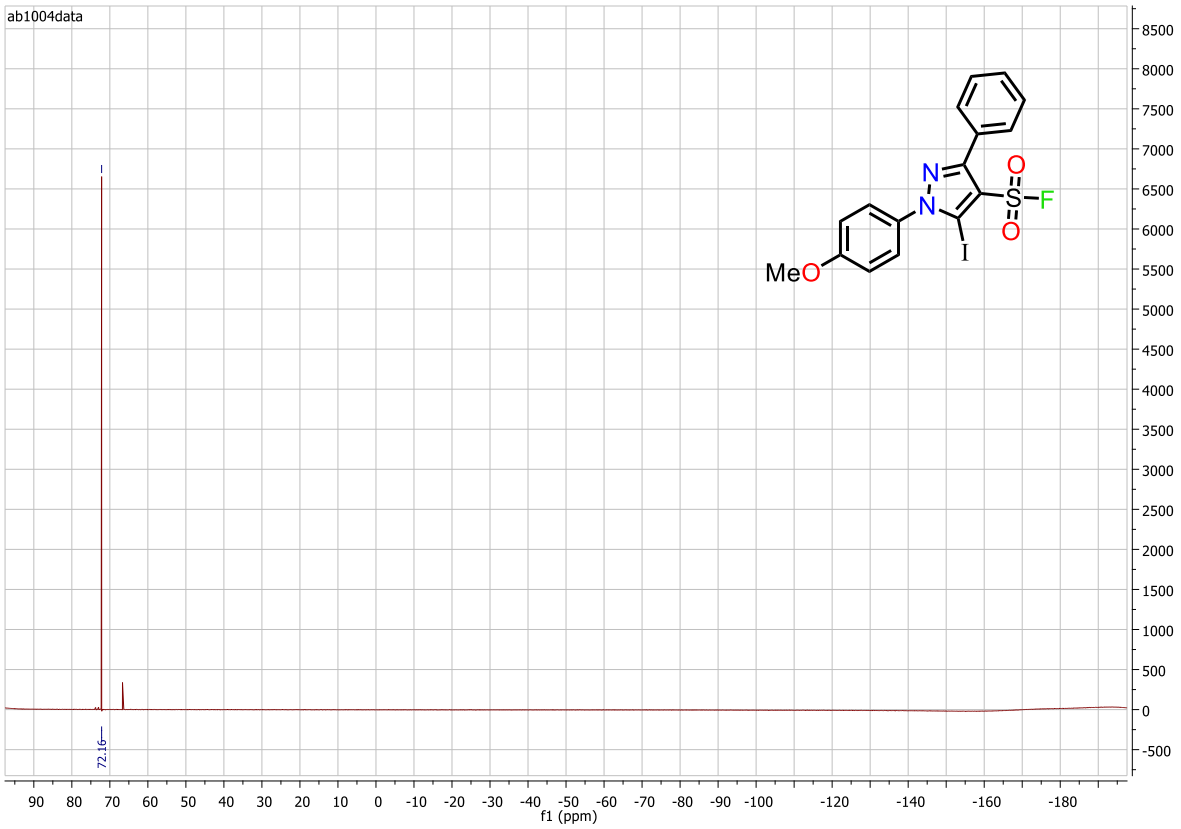

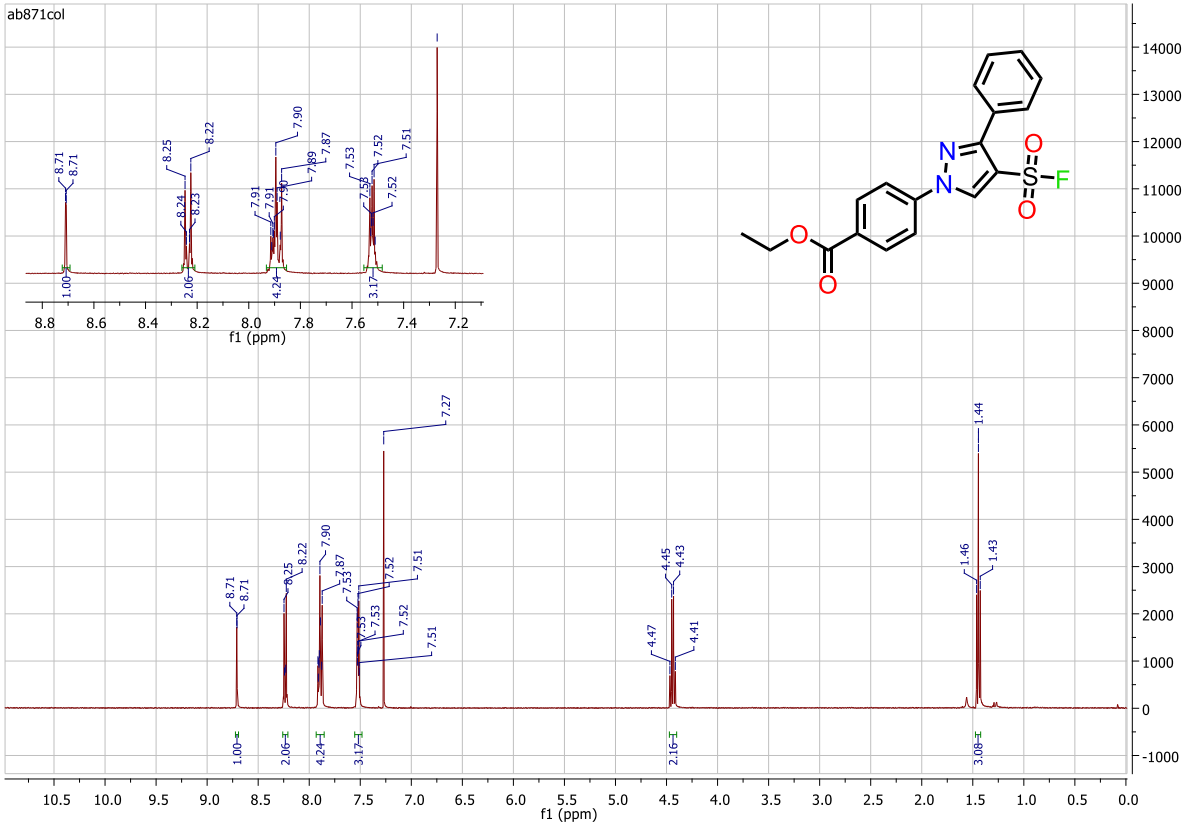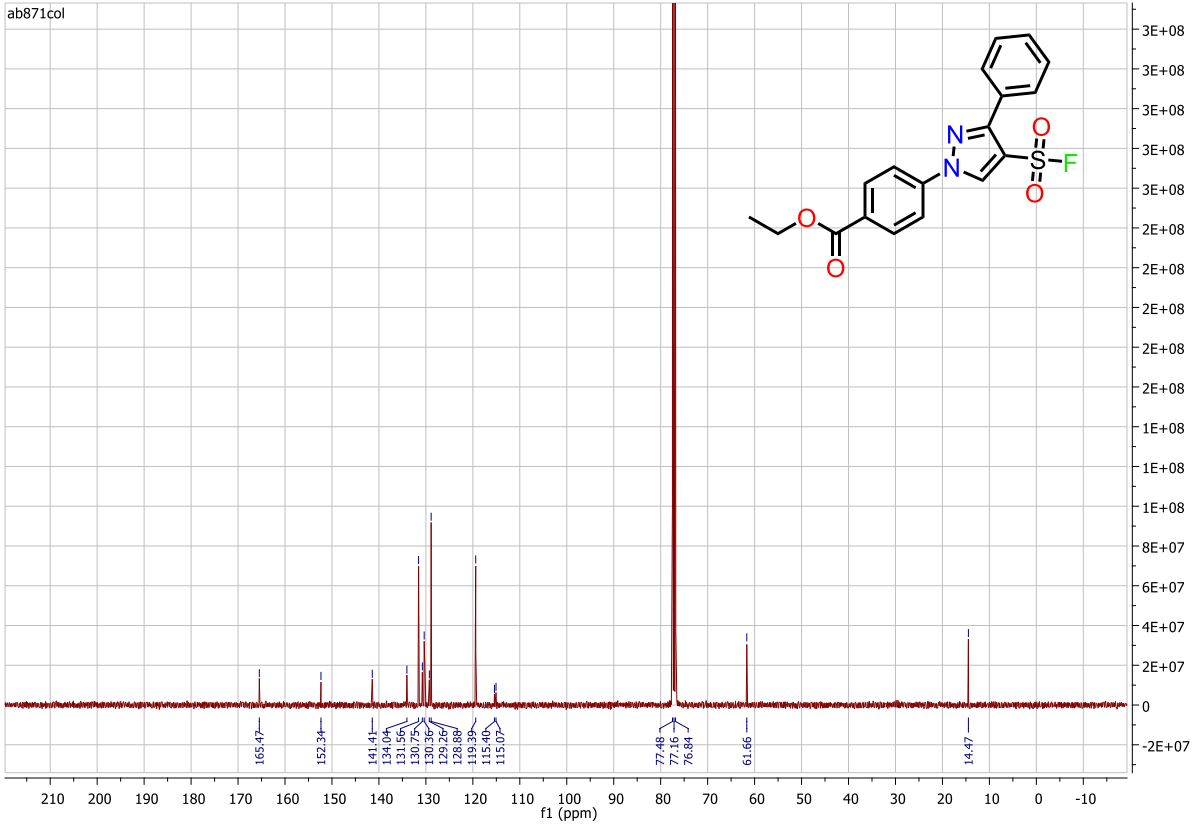

ab871col

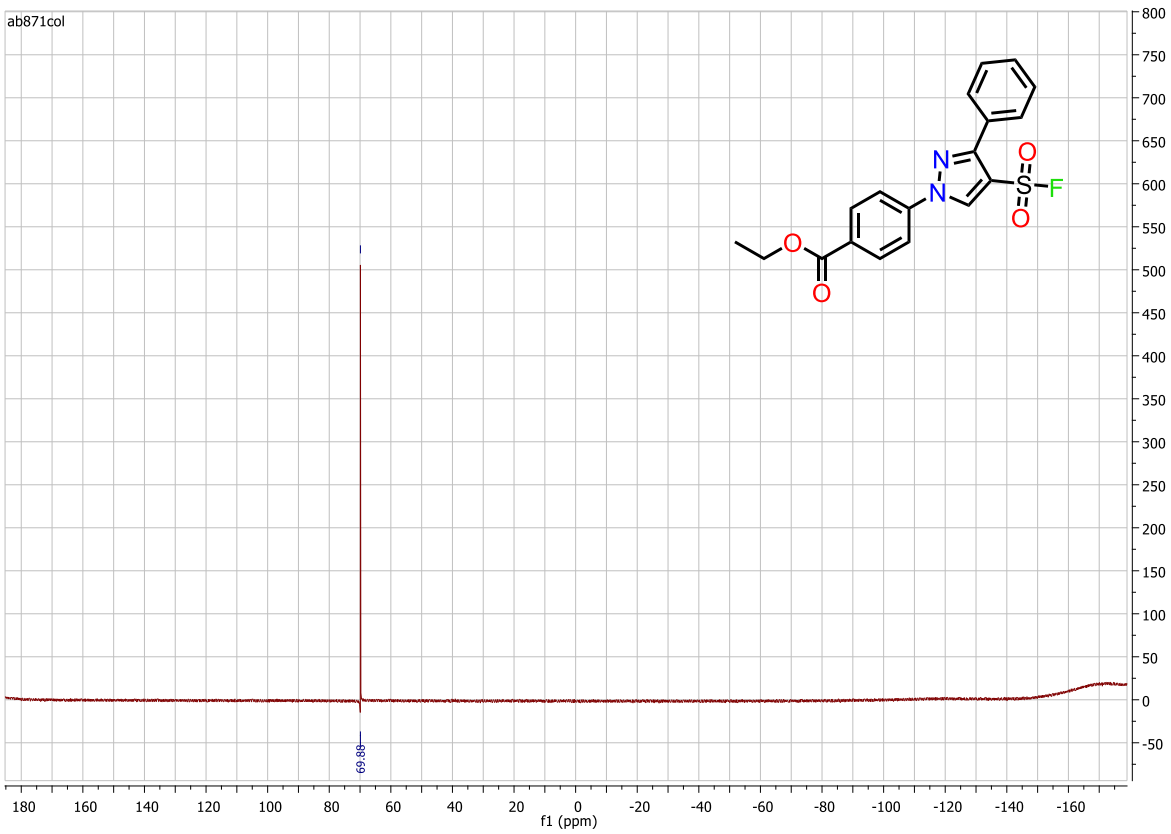



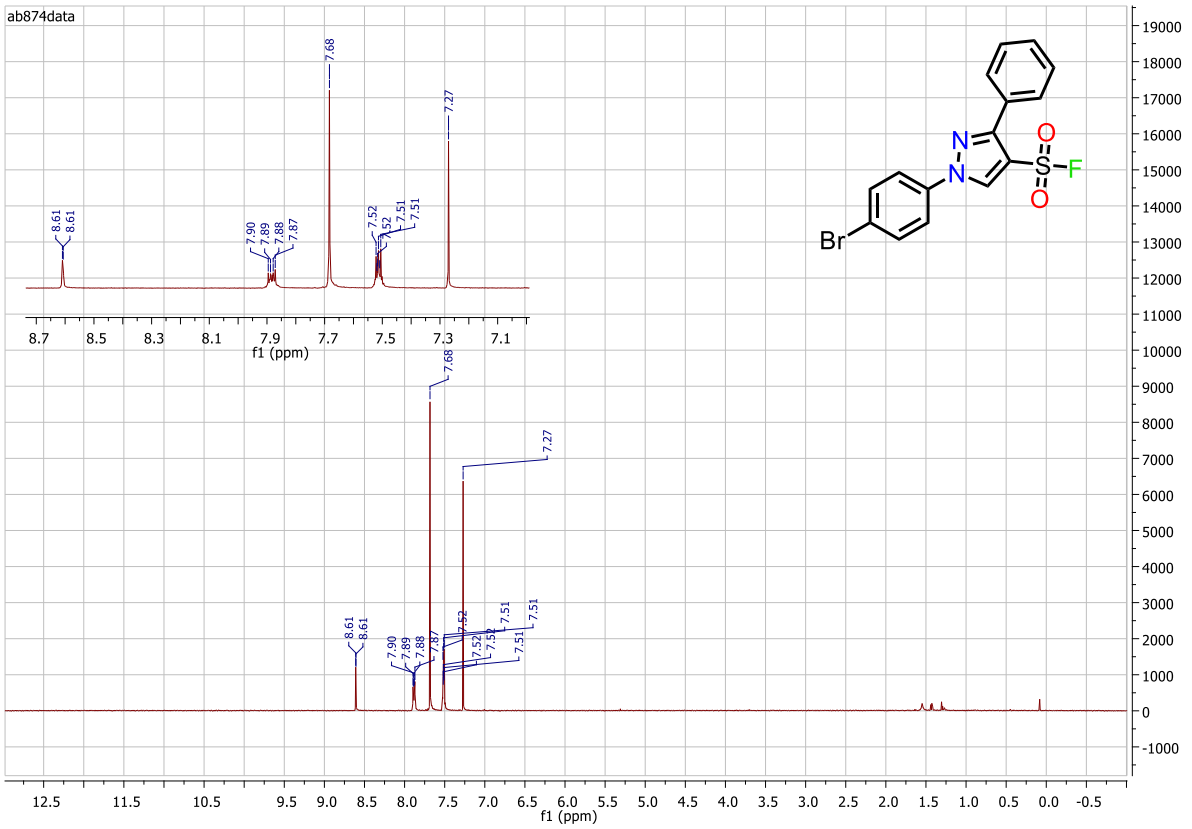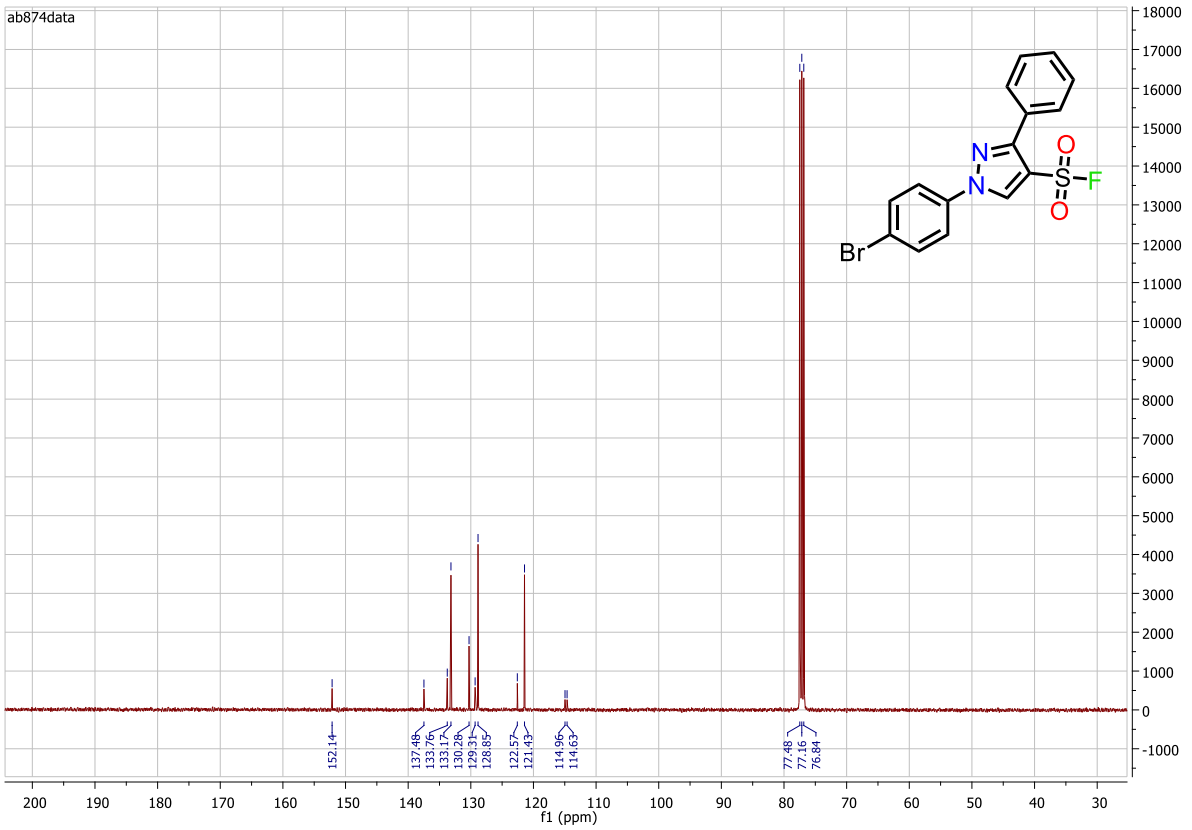

ab874data

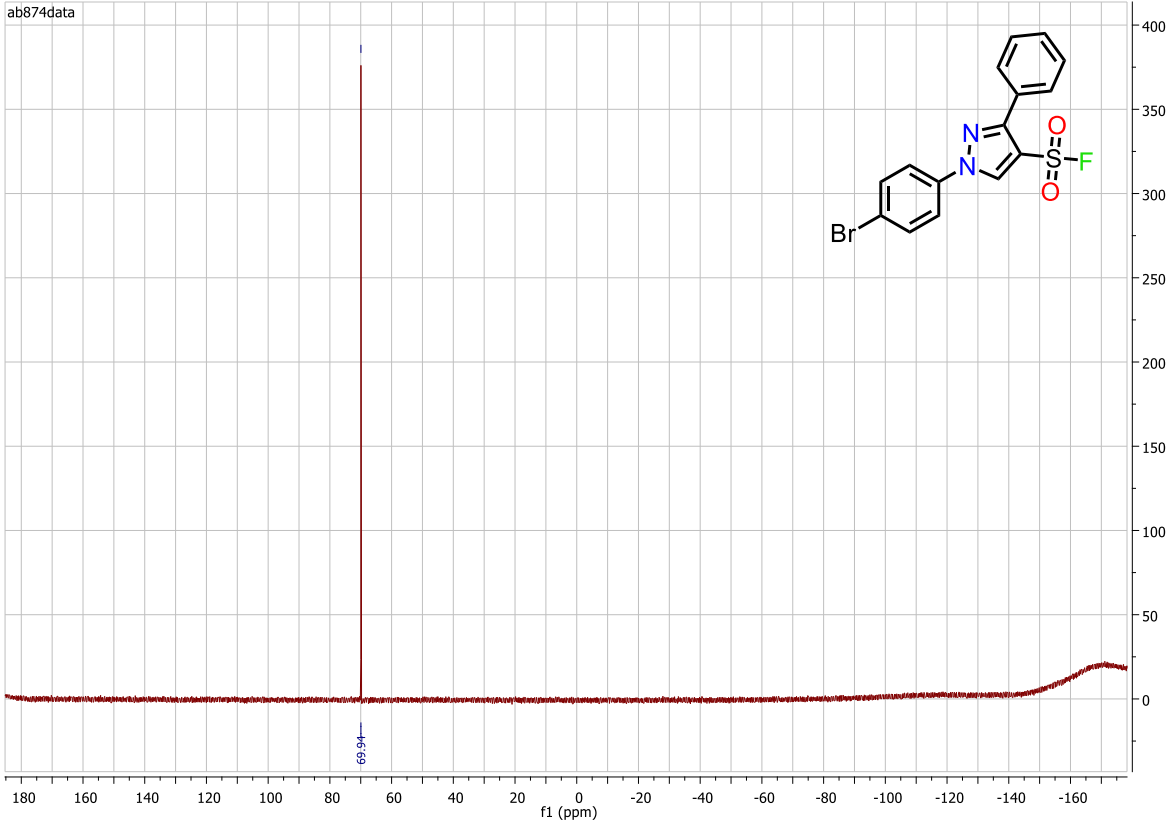

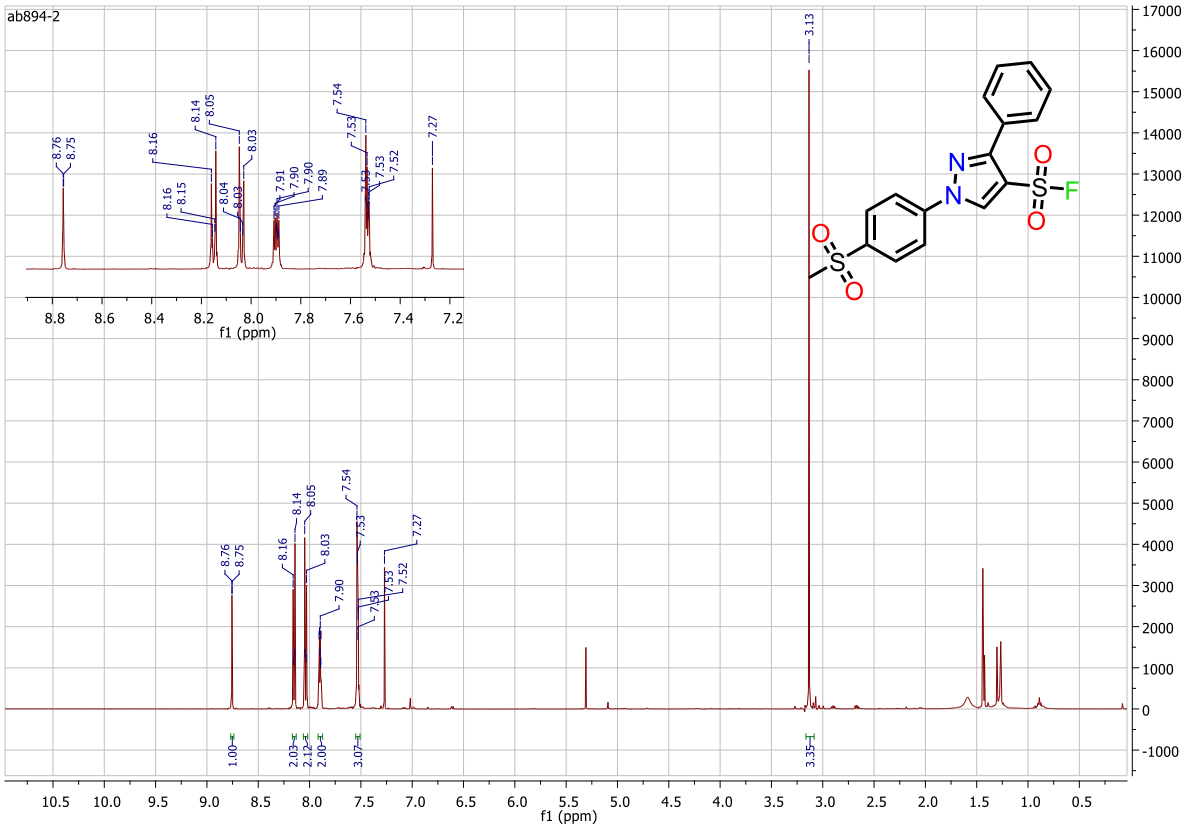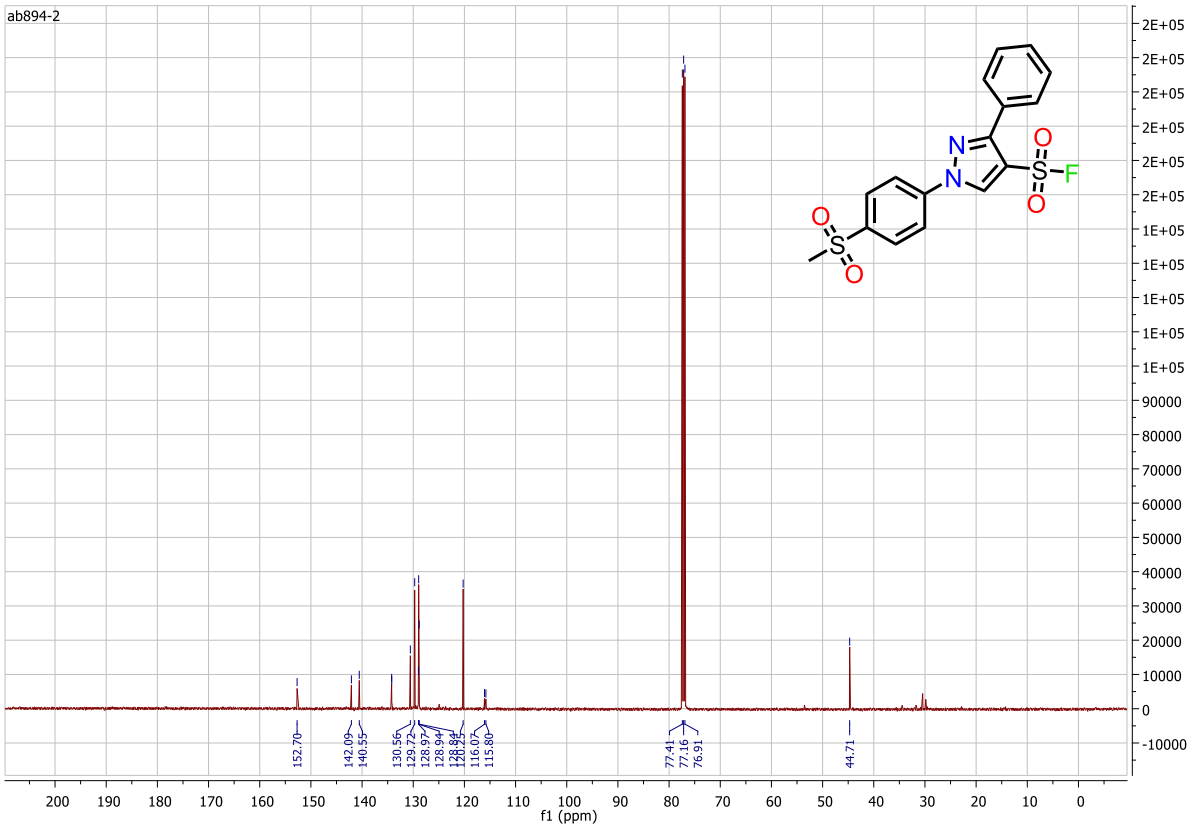

ab894-2

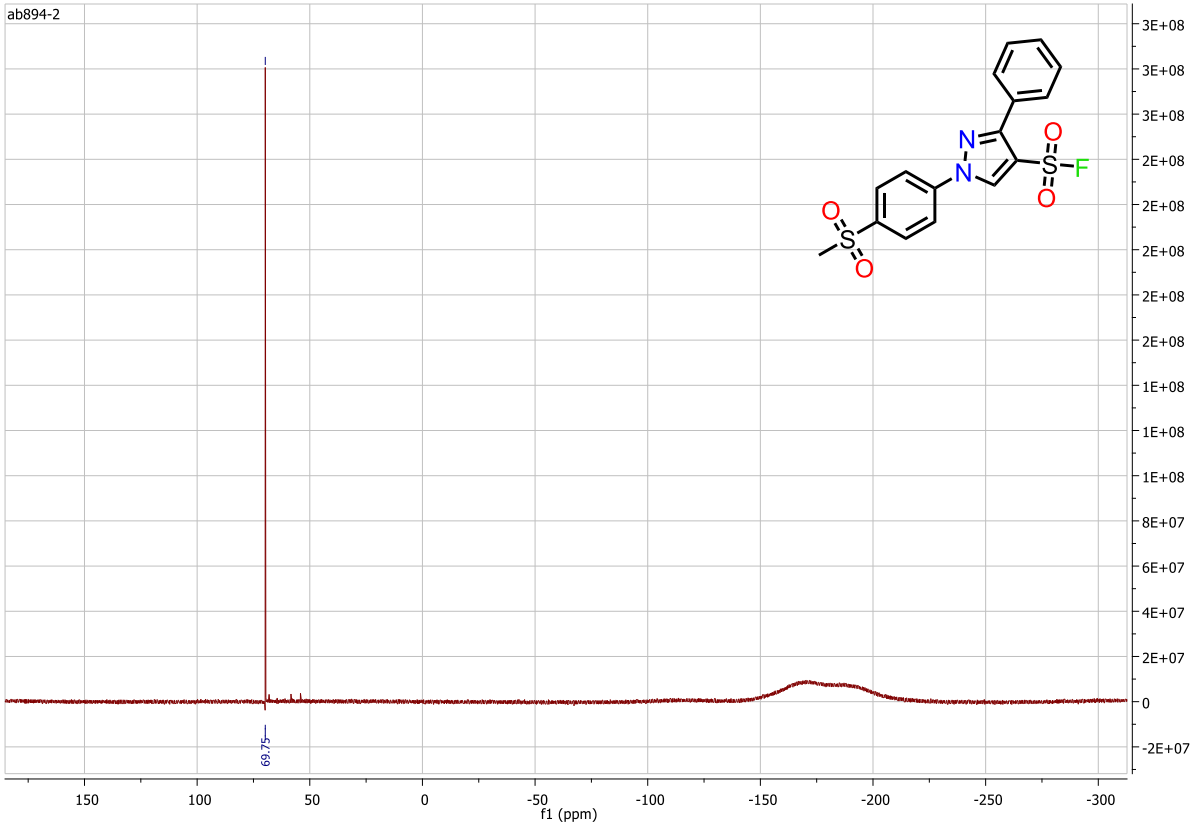

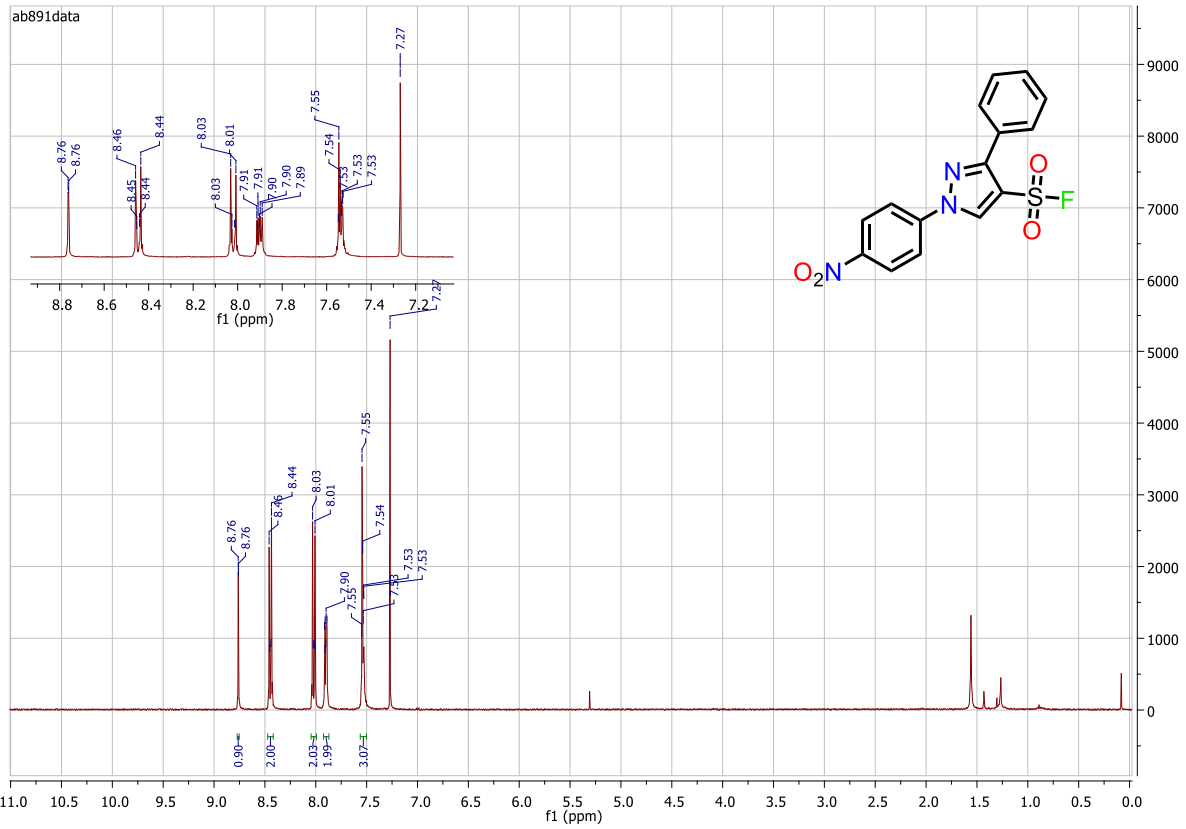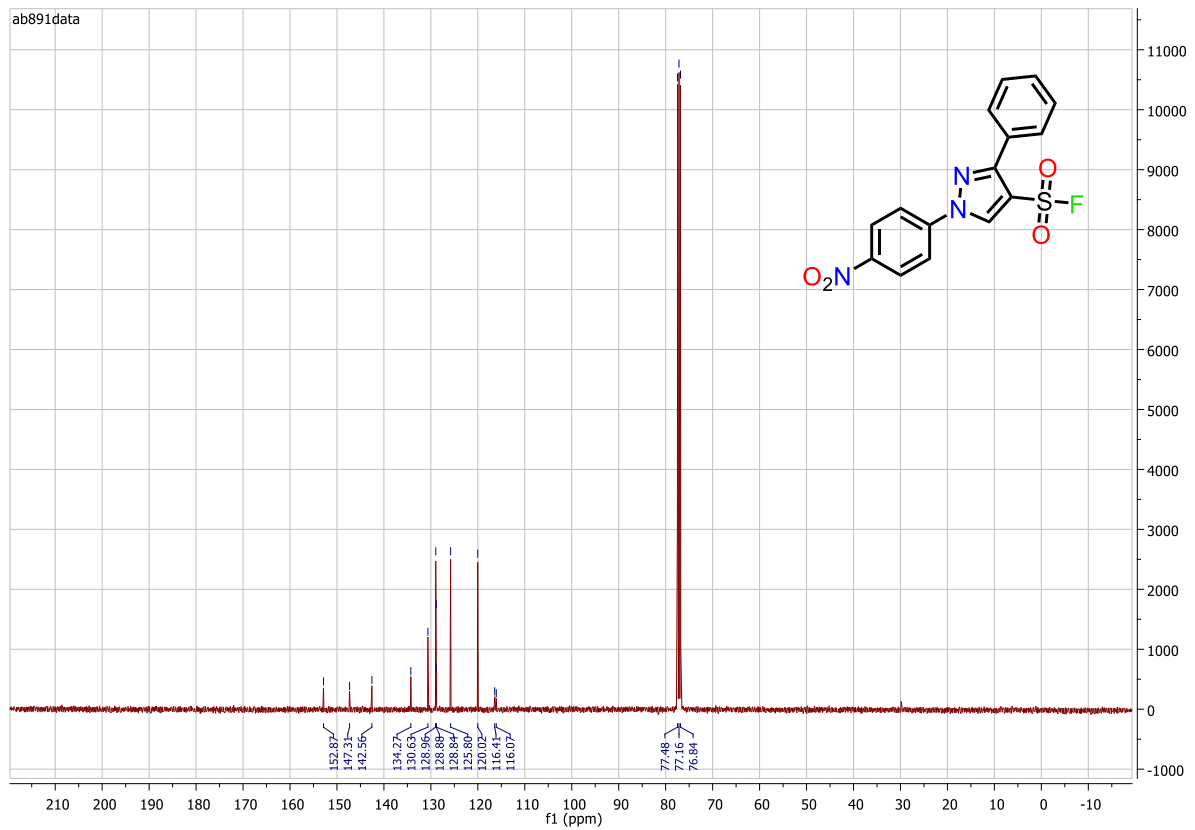

ab891data

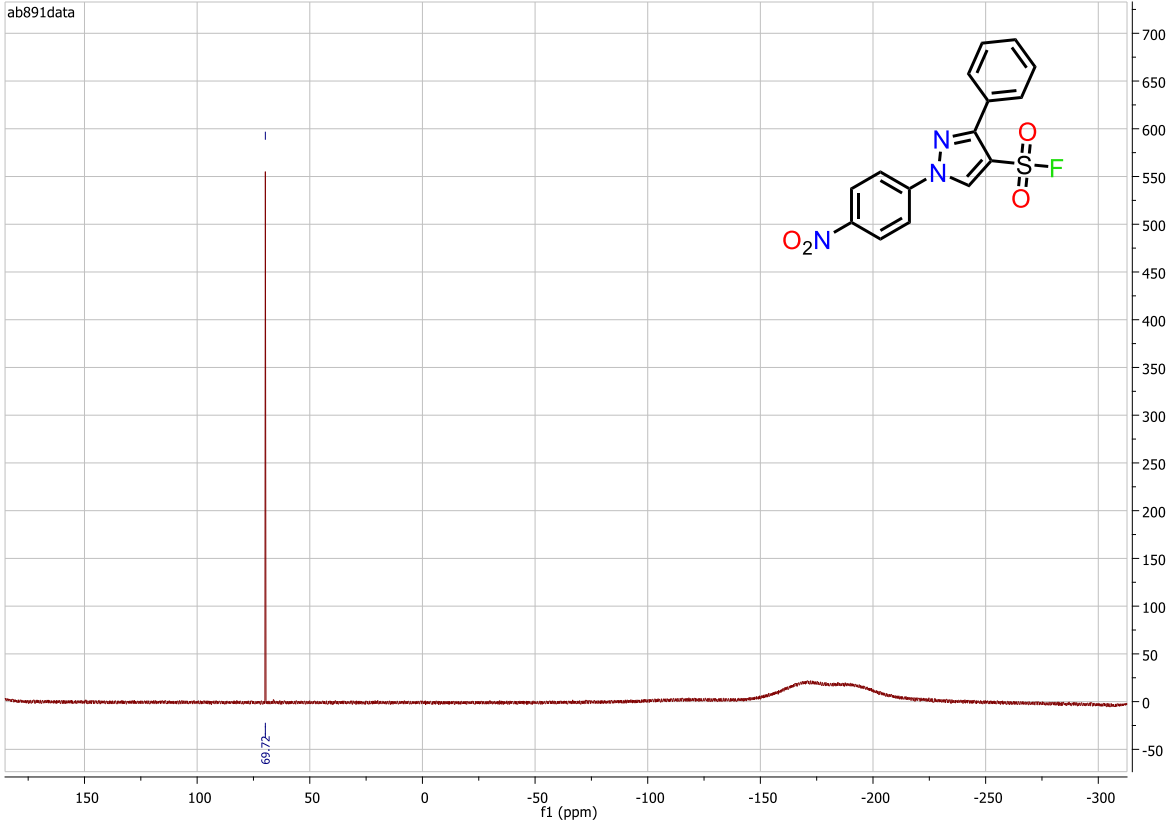

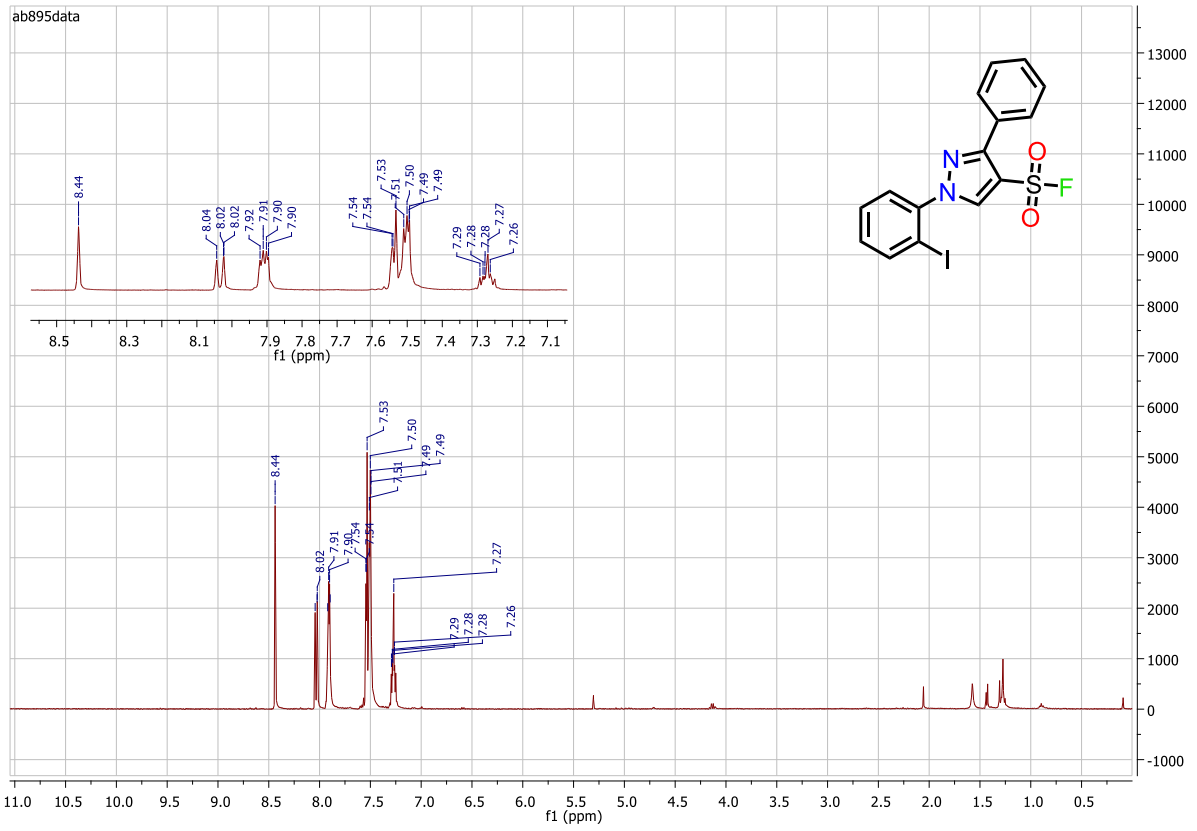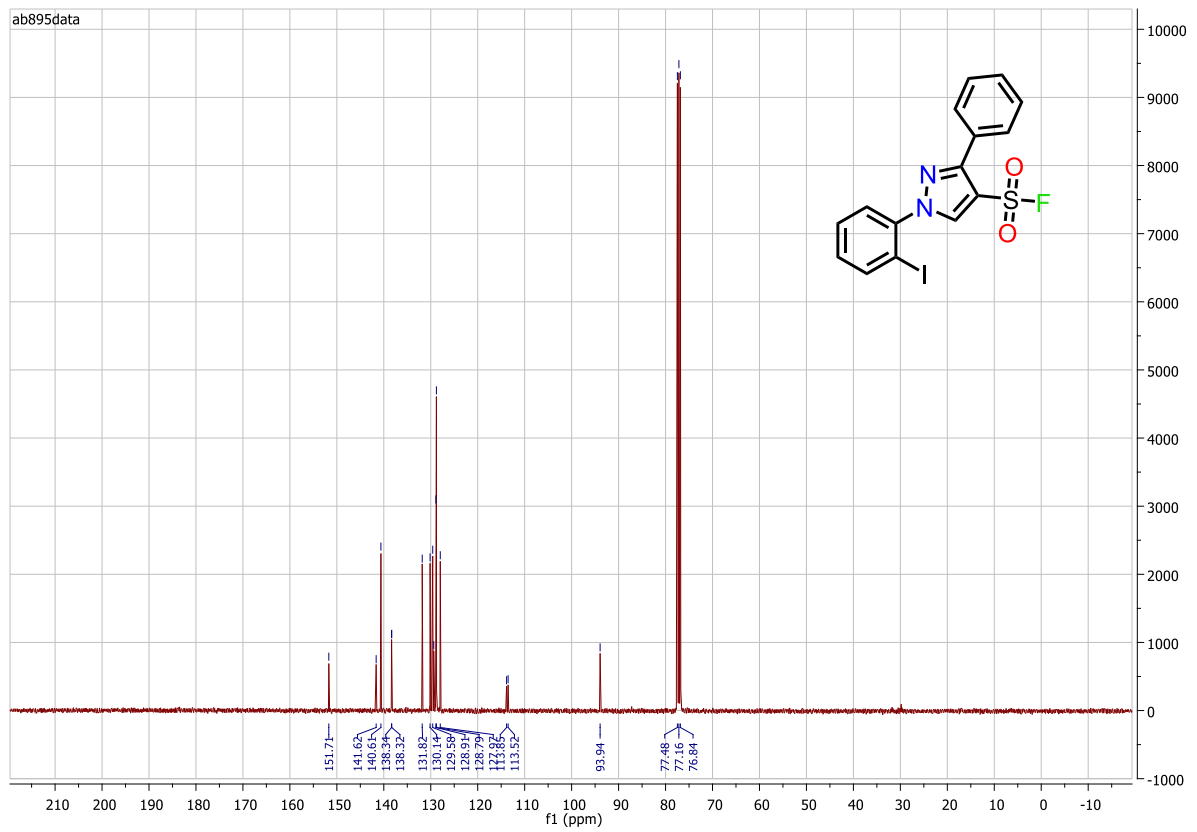

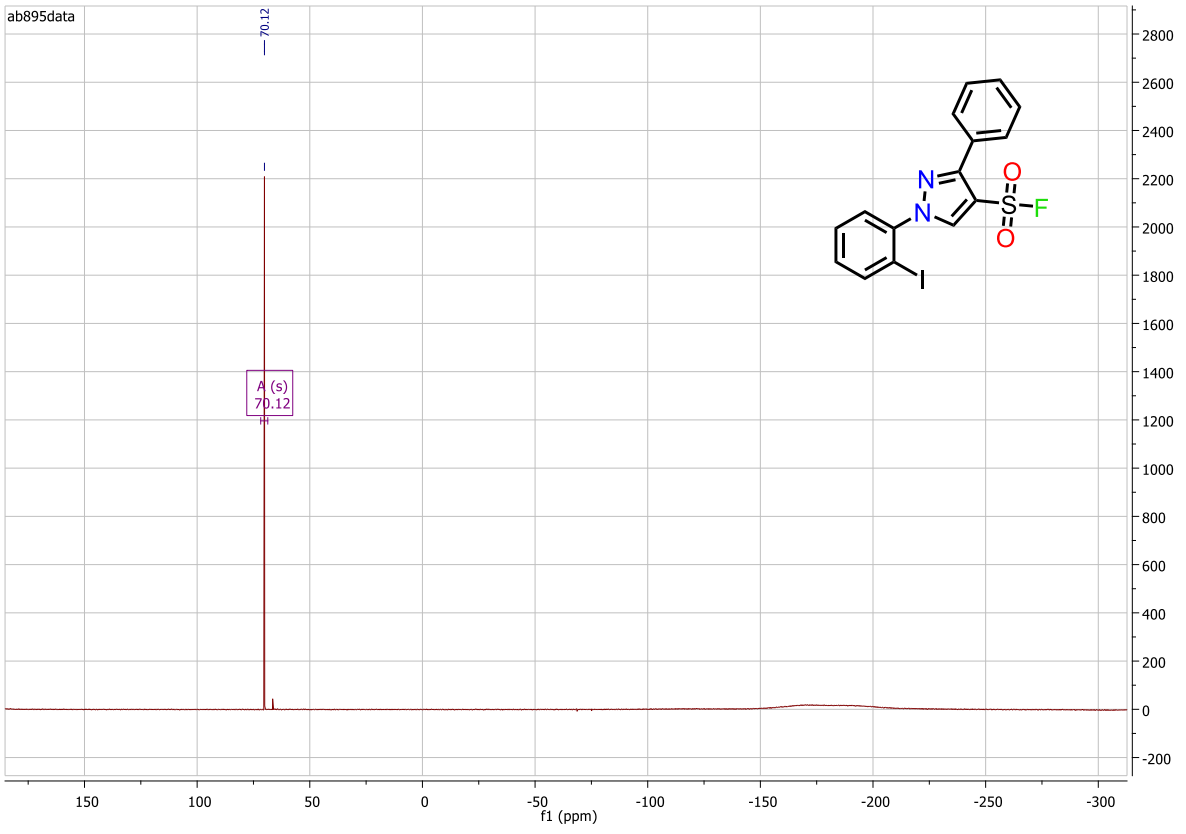



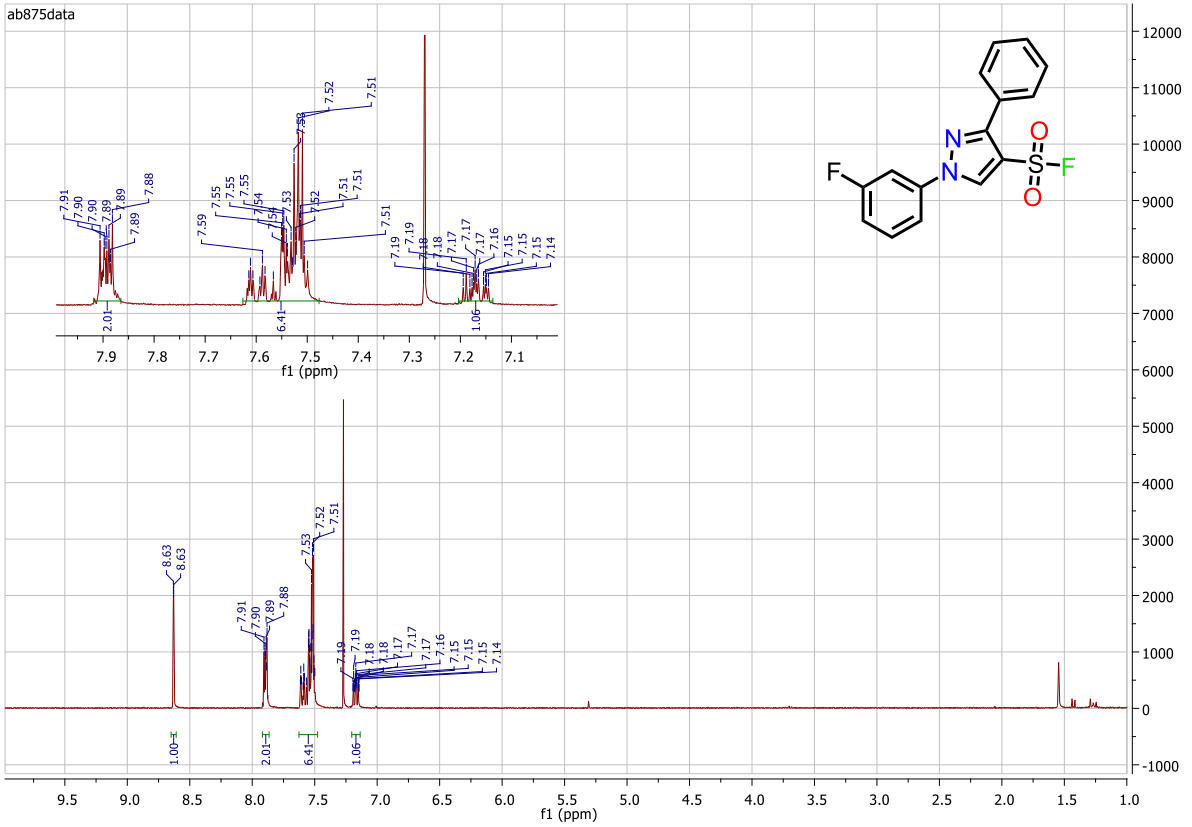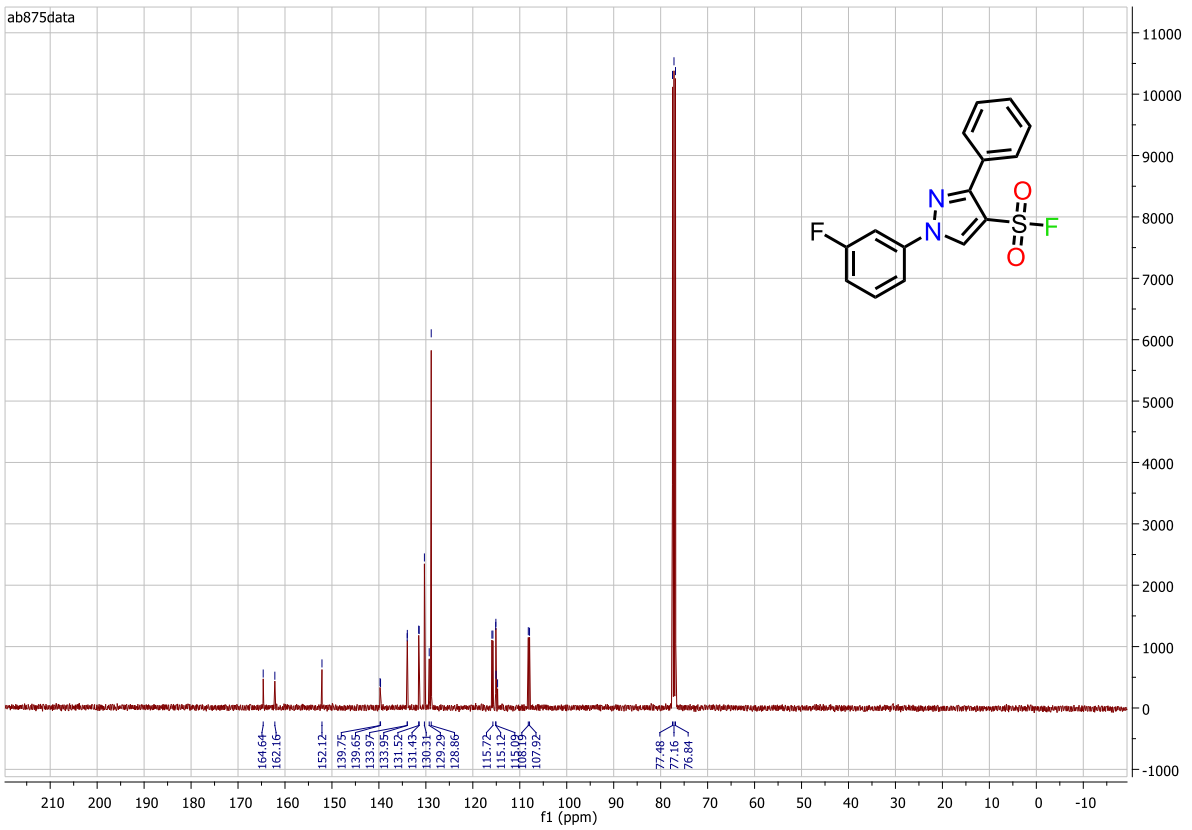

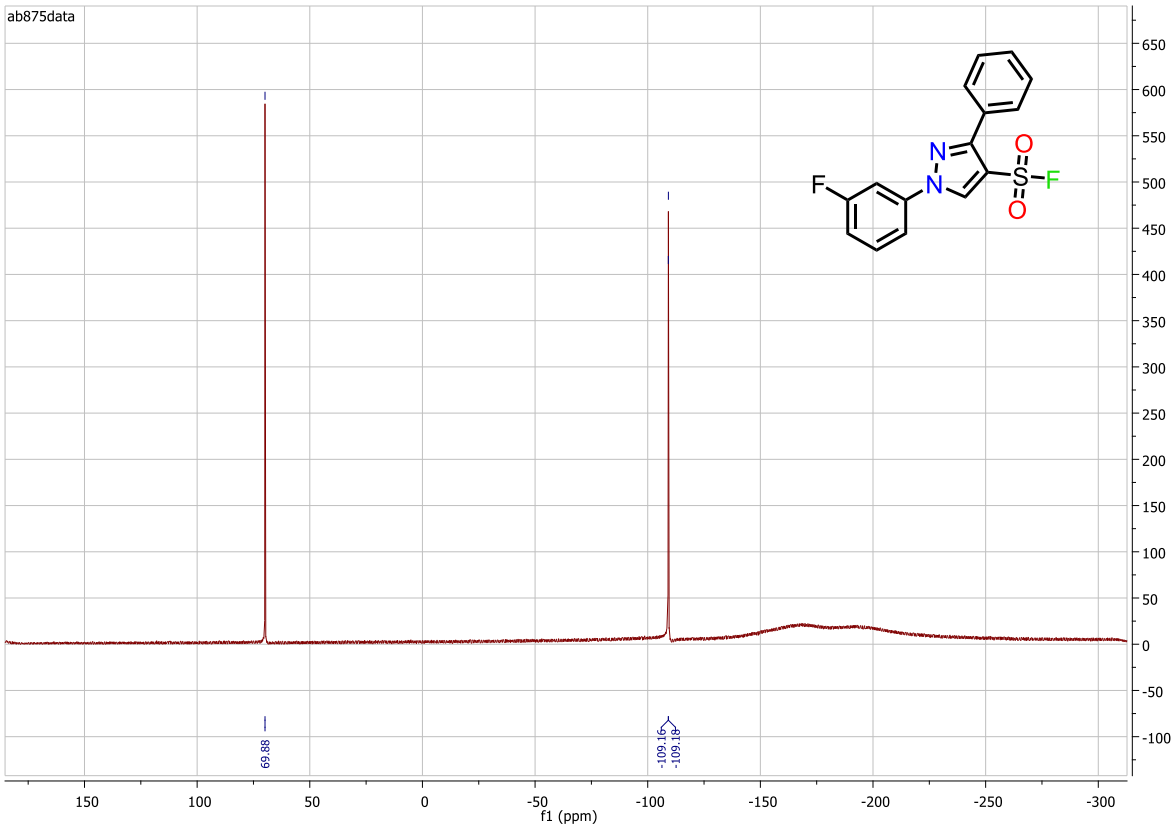

ab943data

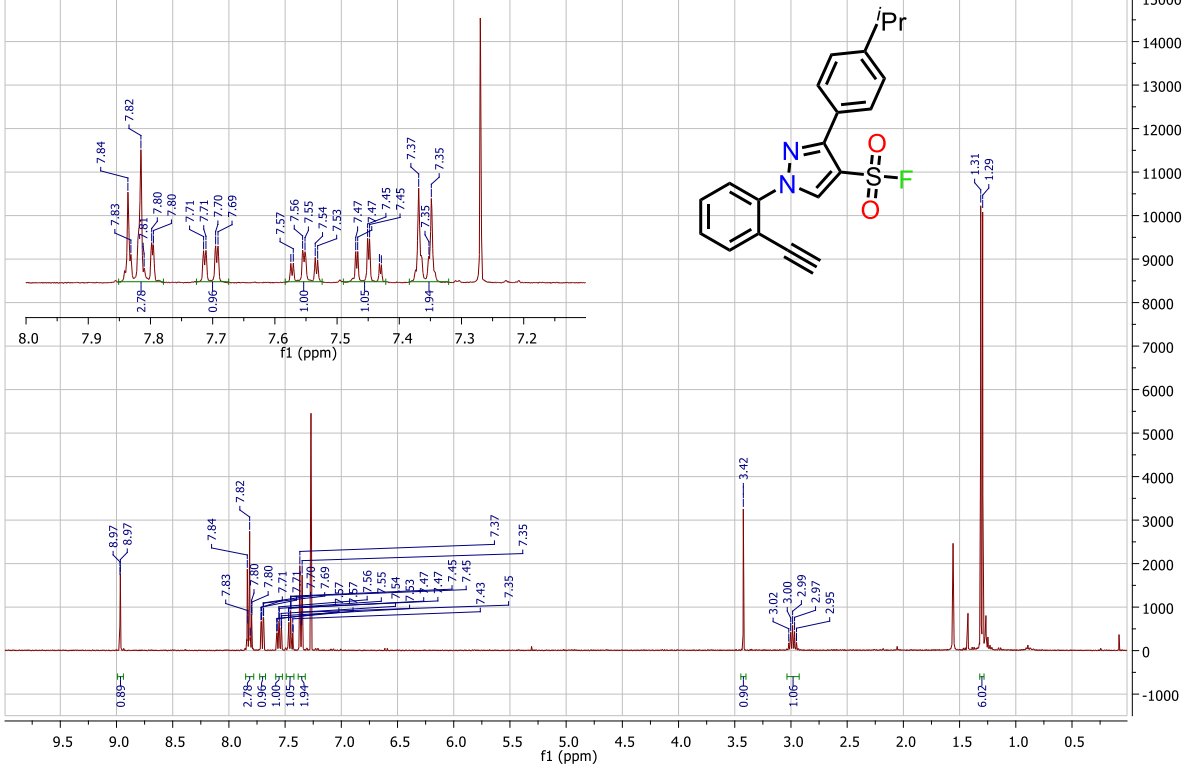

ab943data

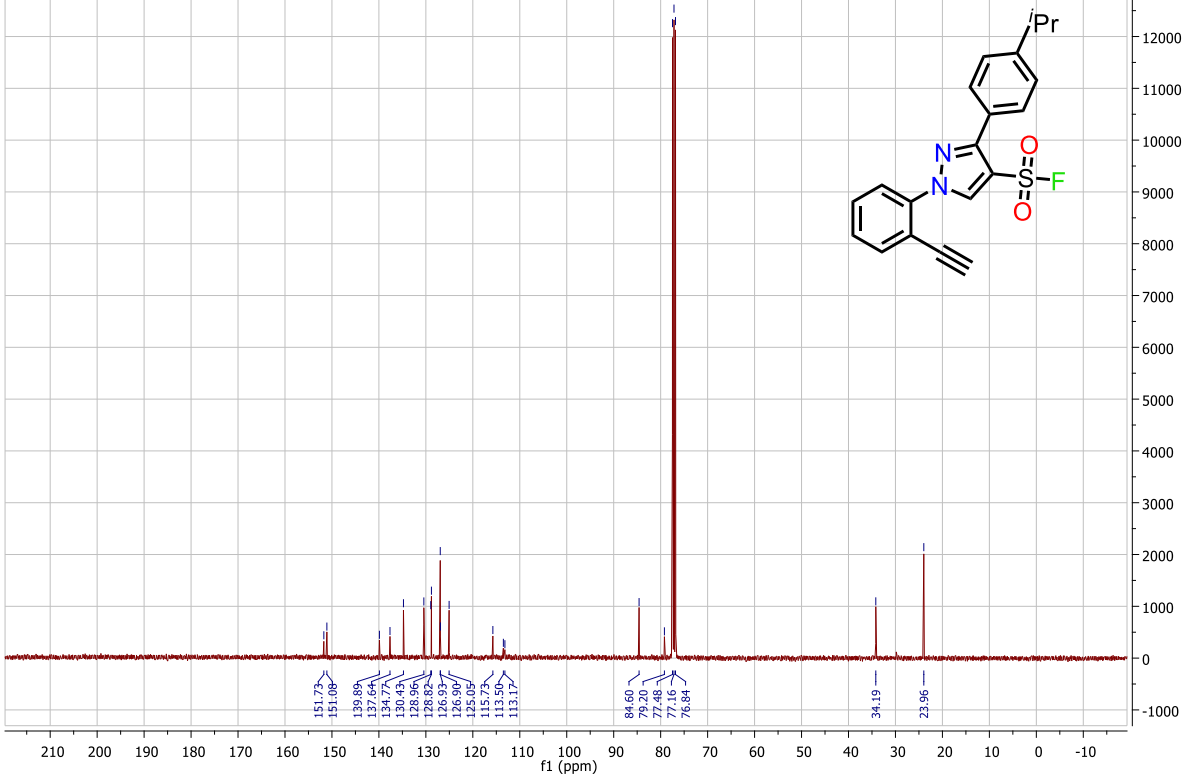

ab943data

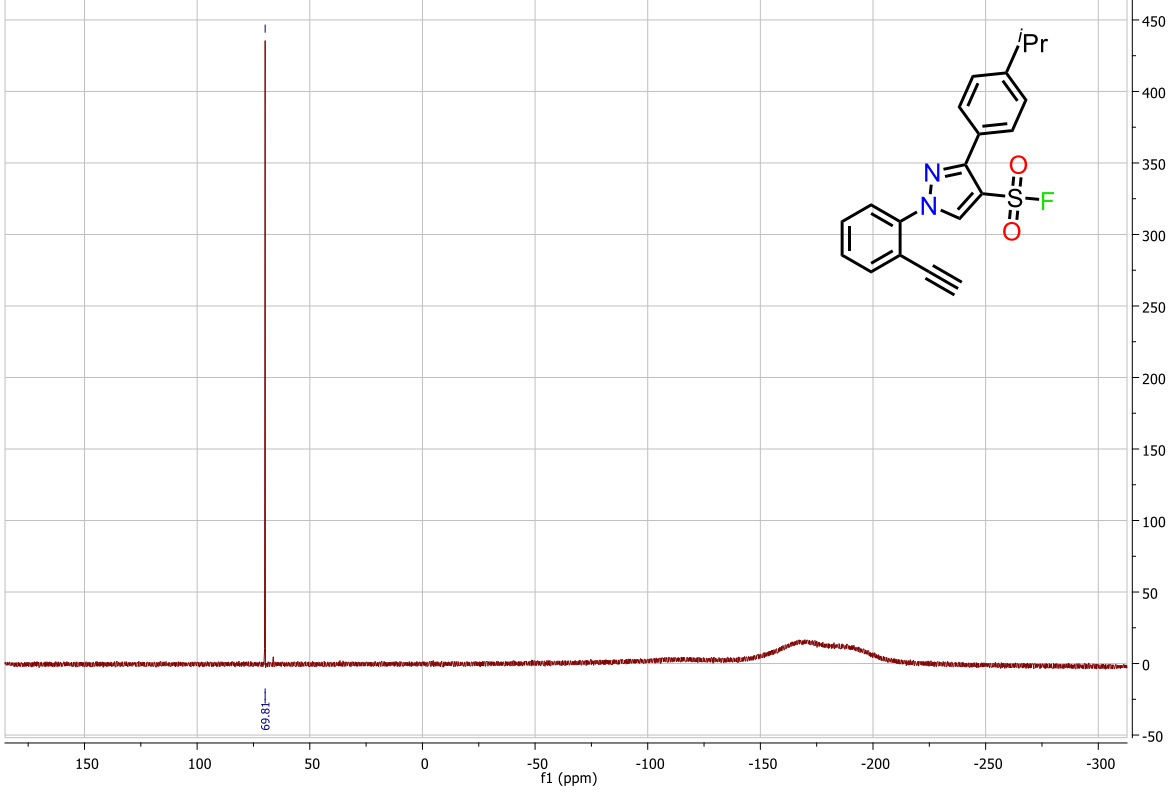

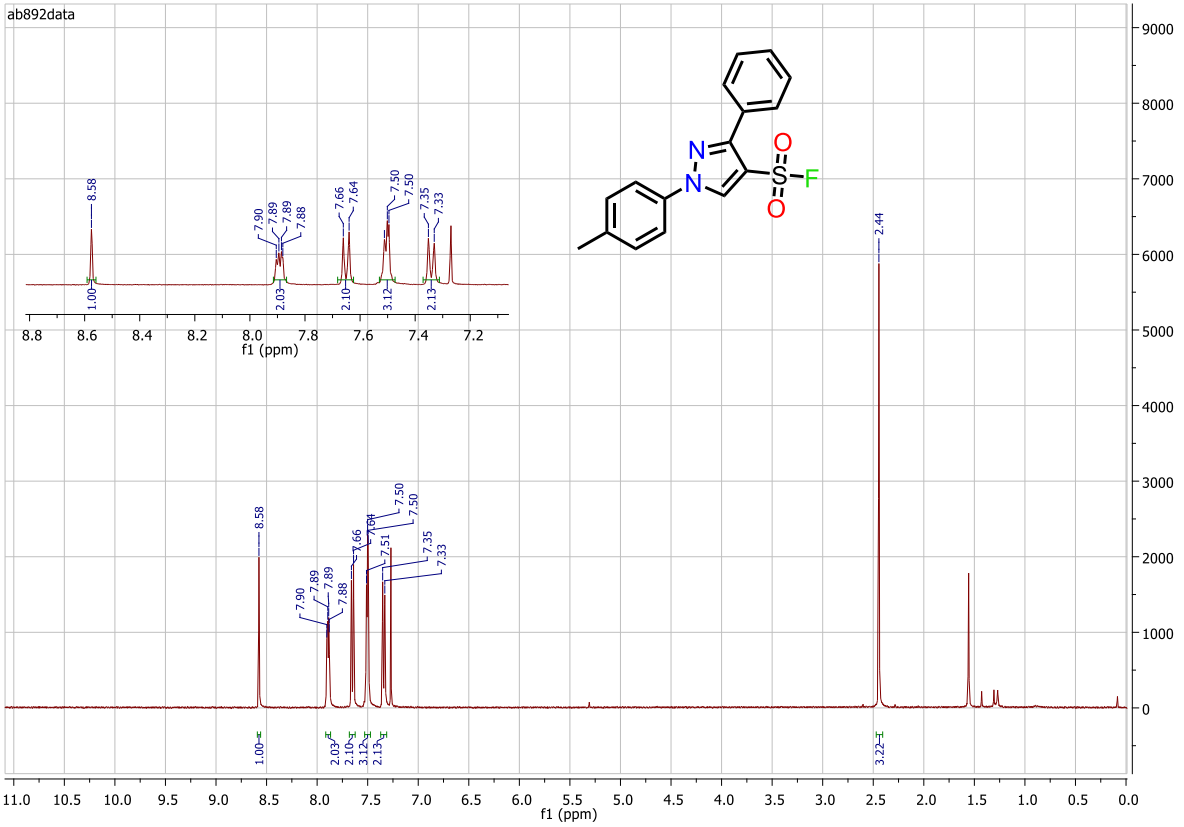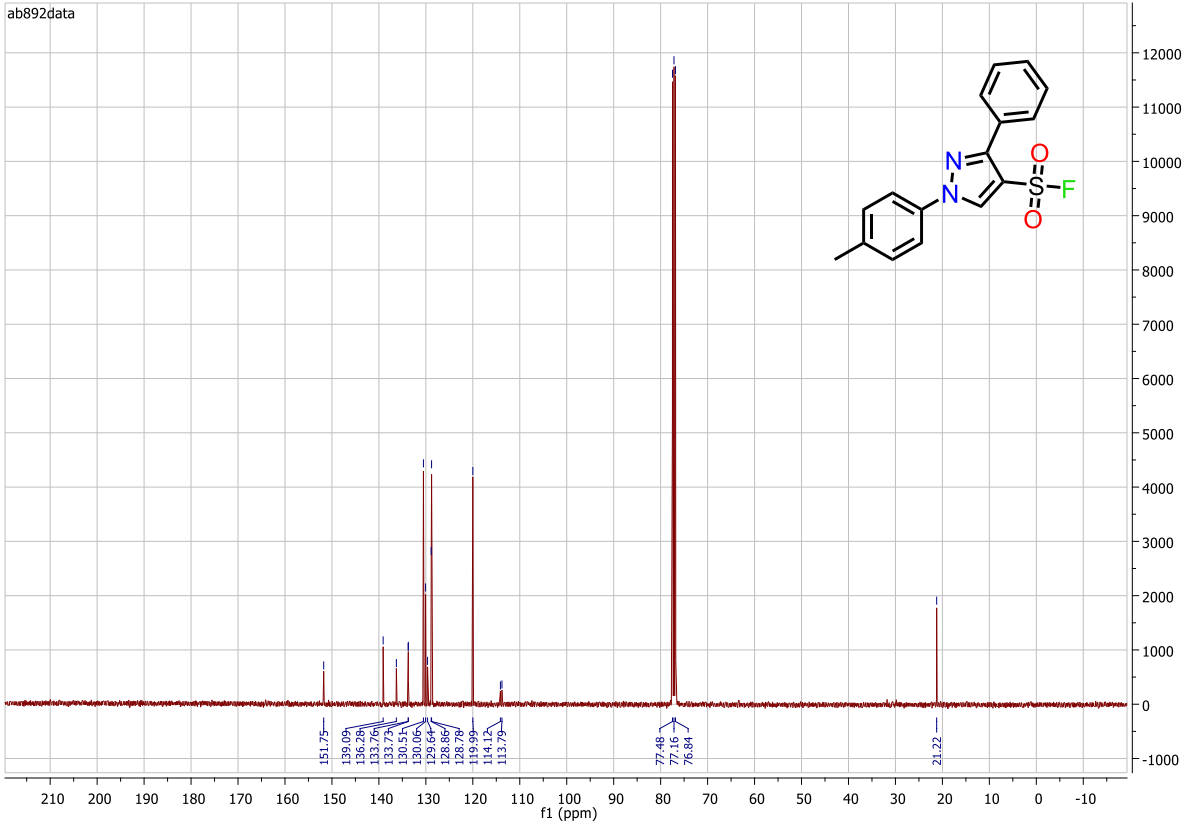

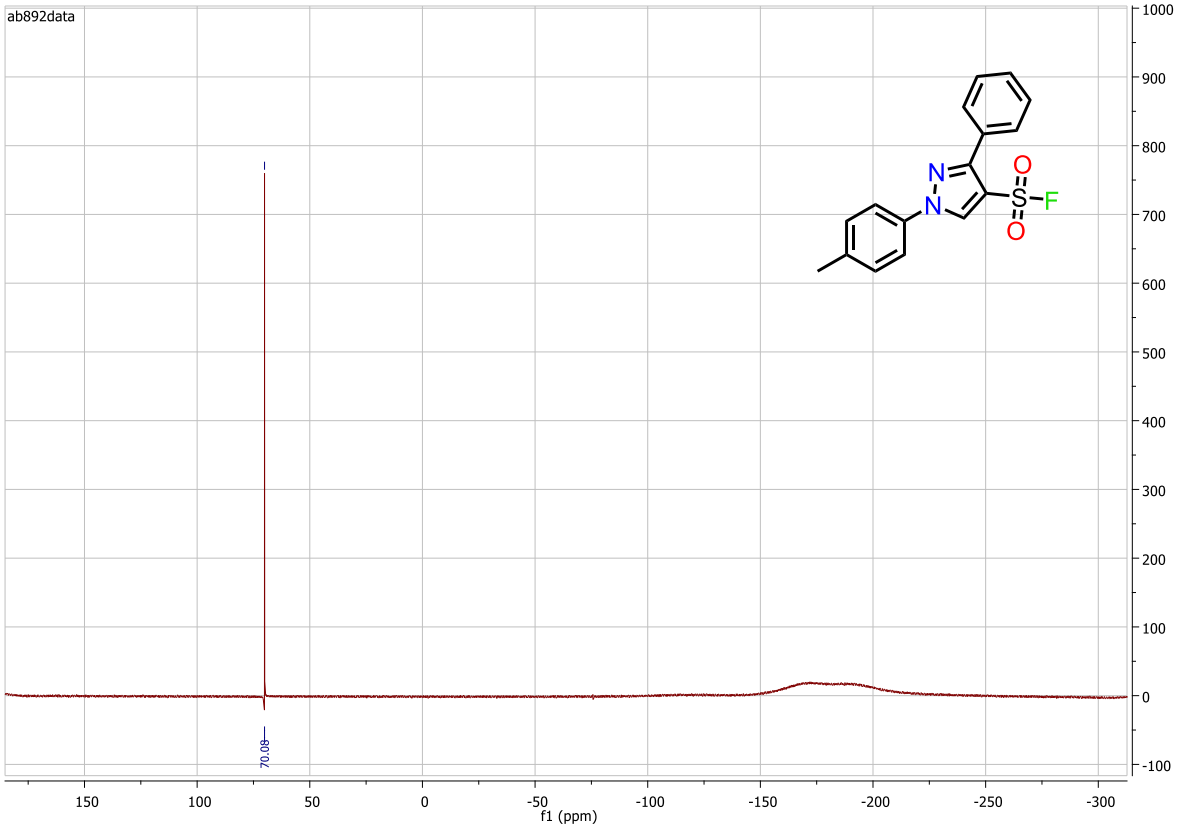

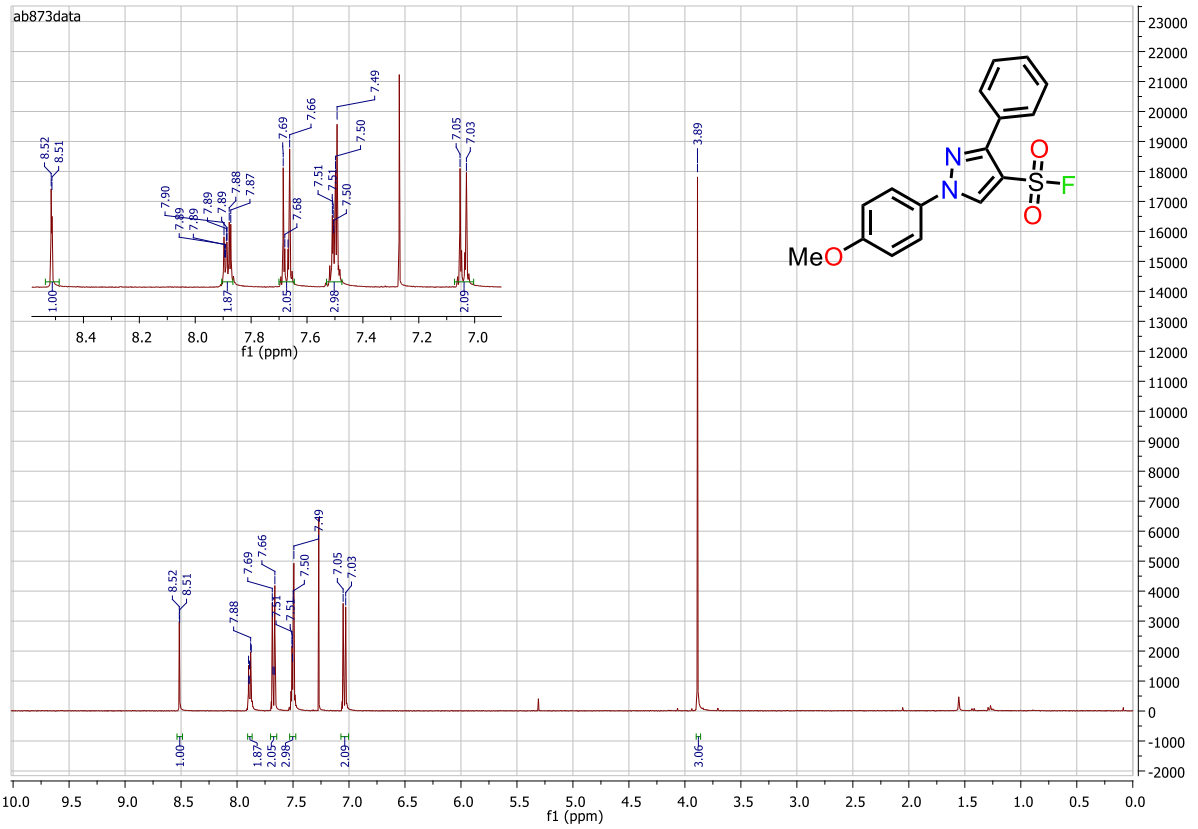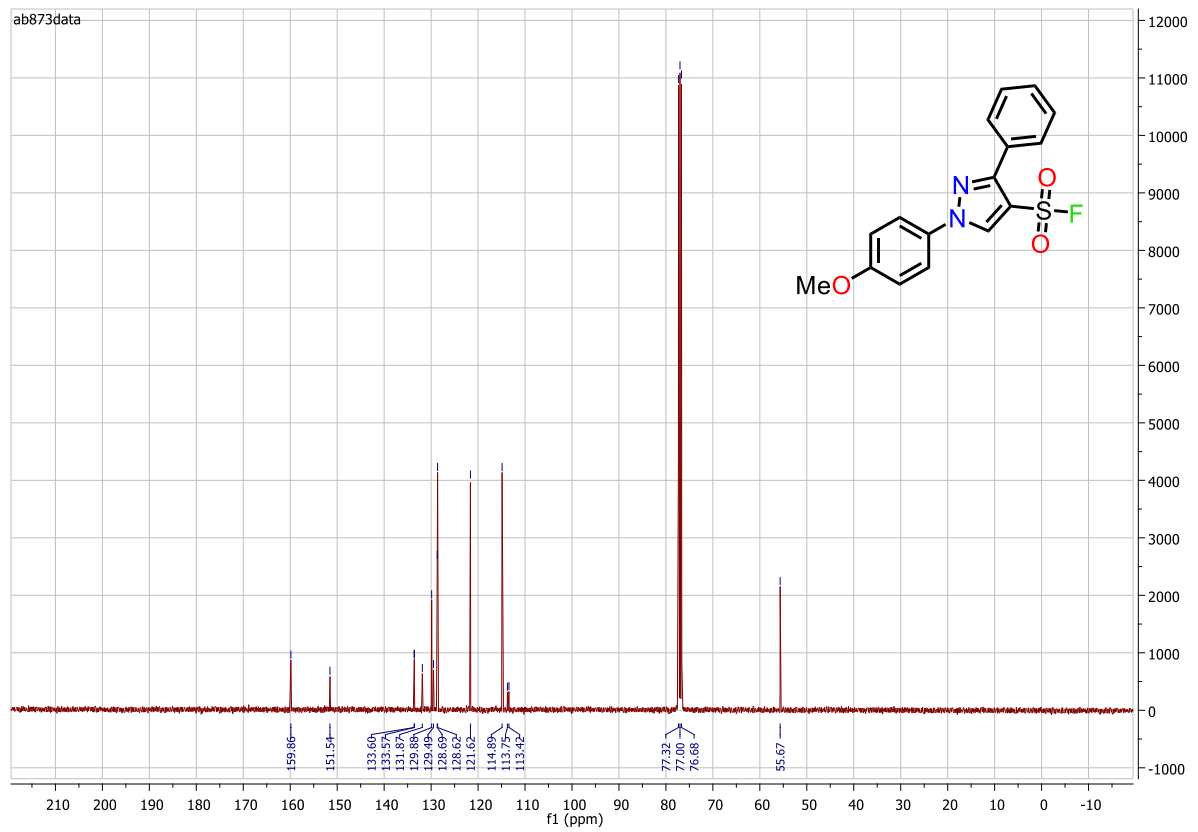

ab873data

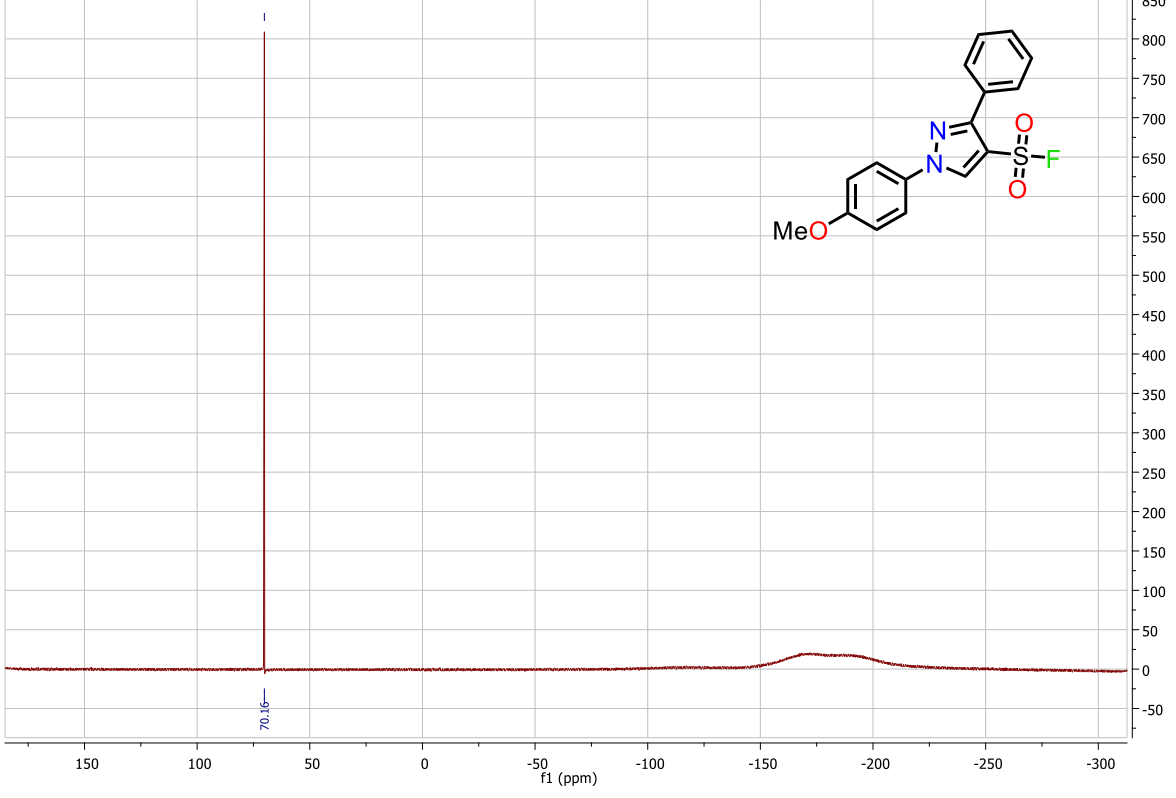



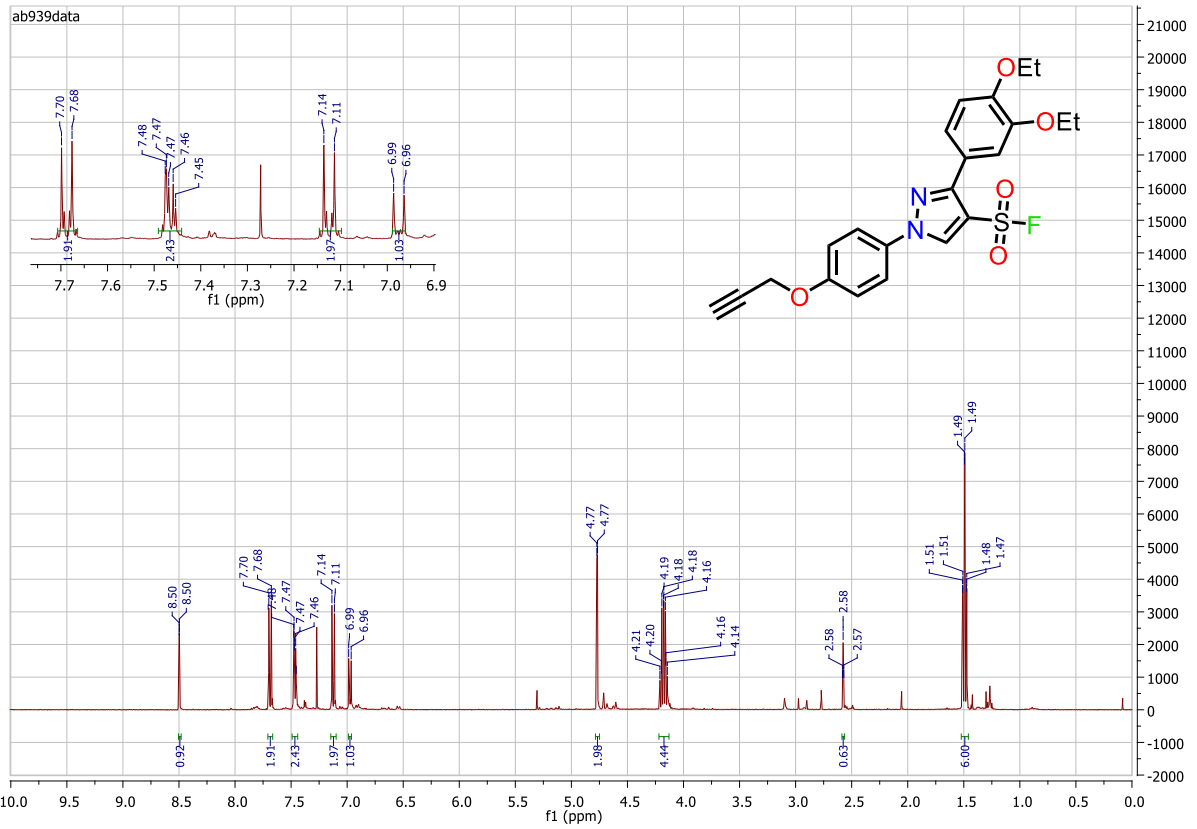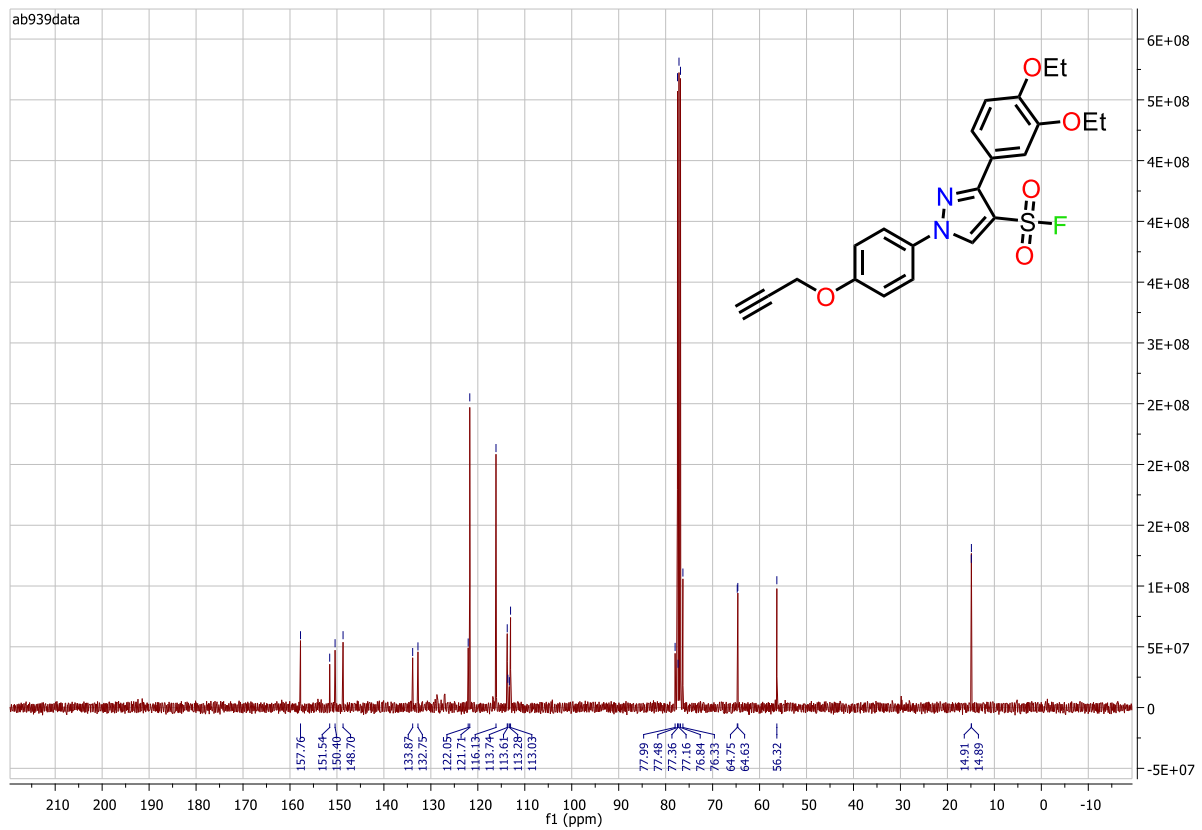

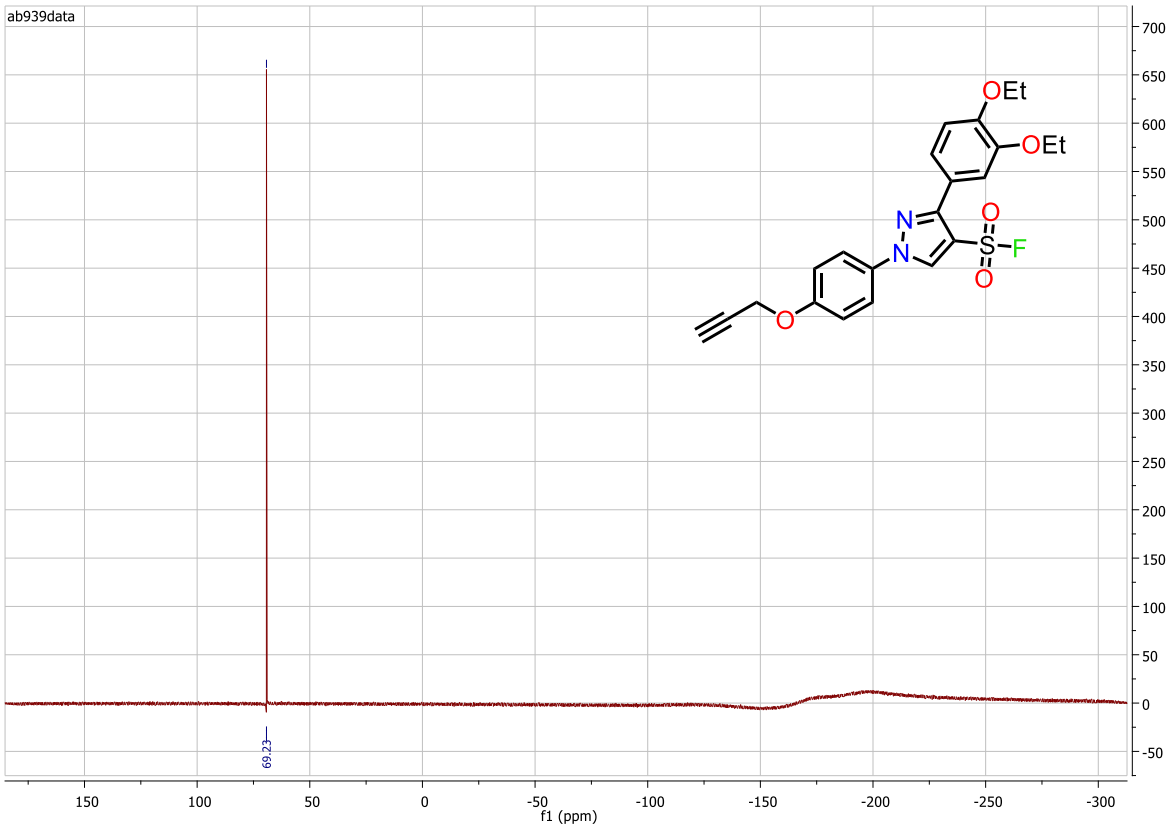

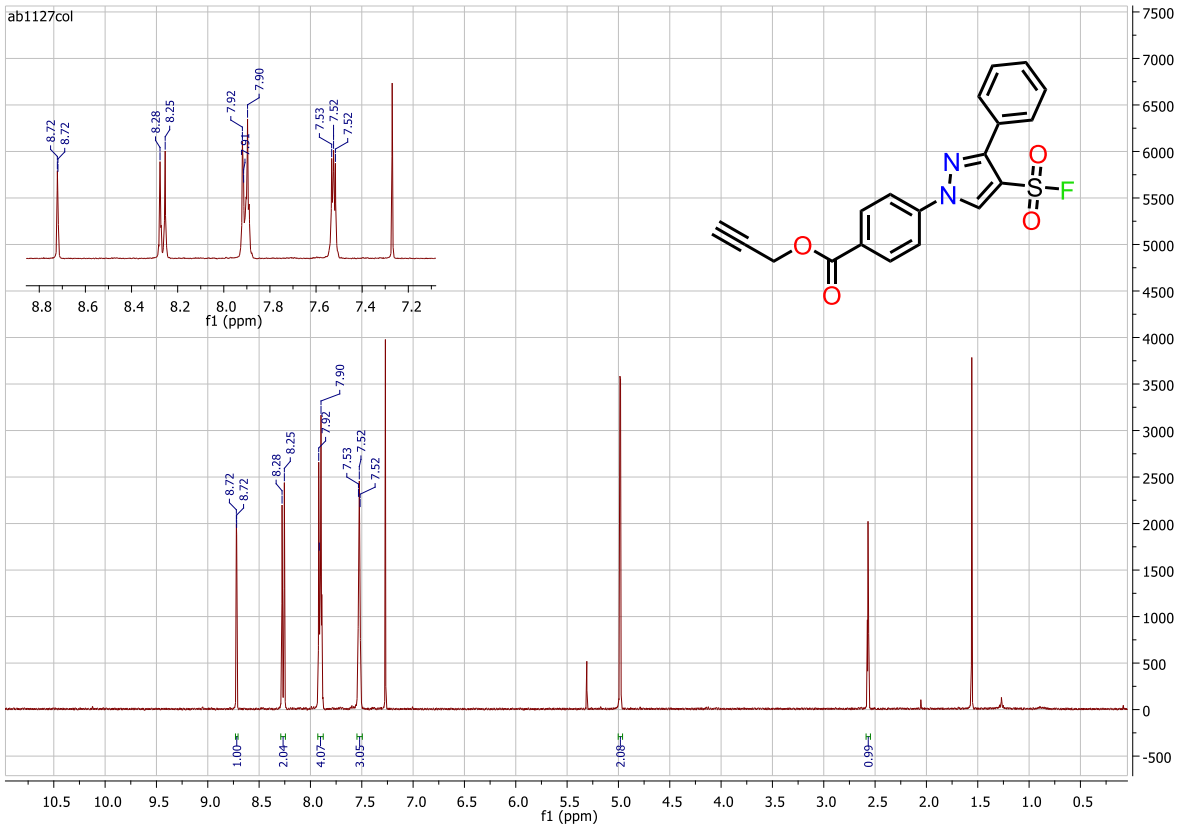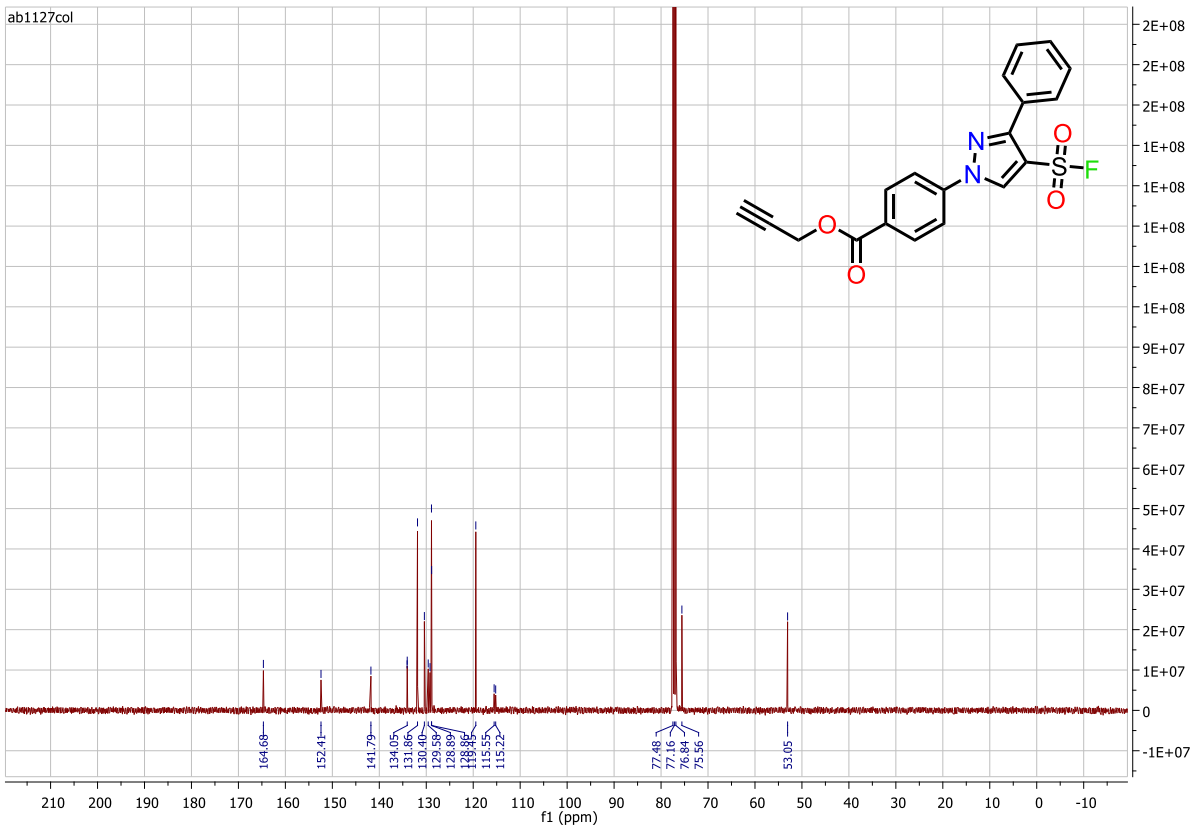

ab1127col

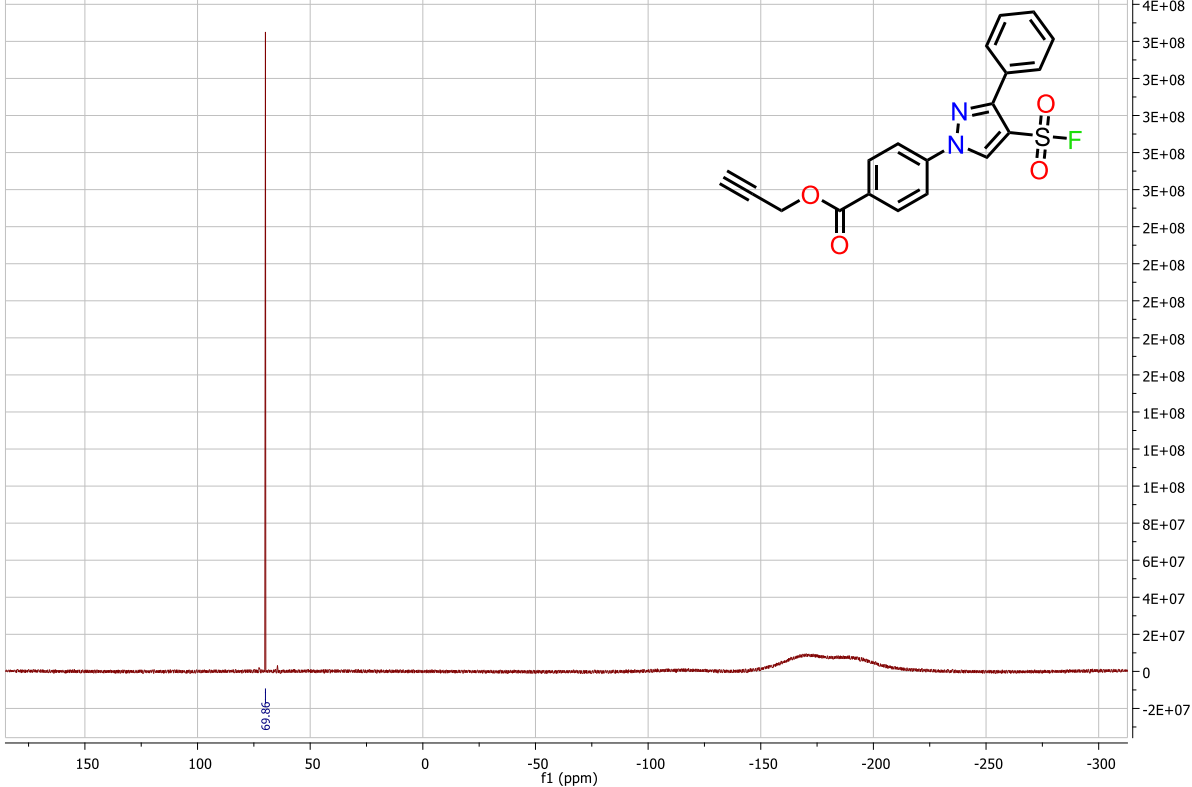

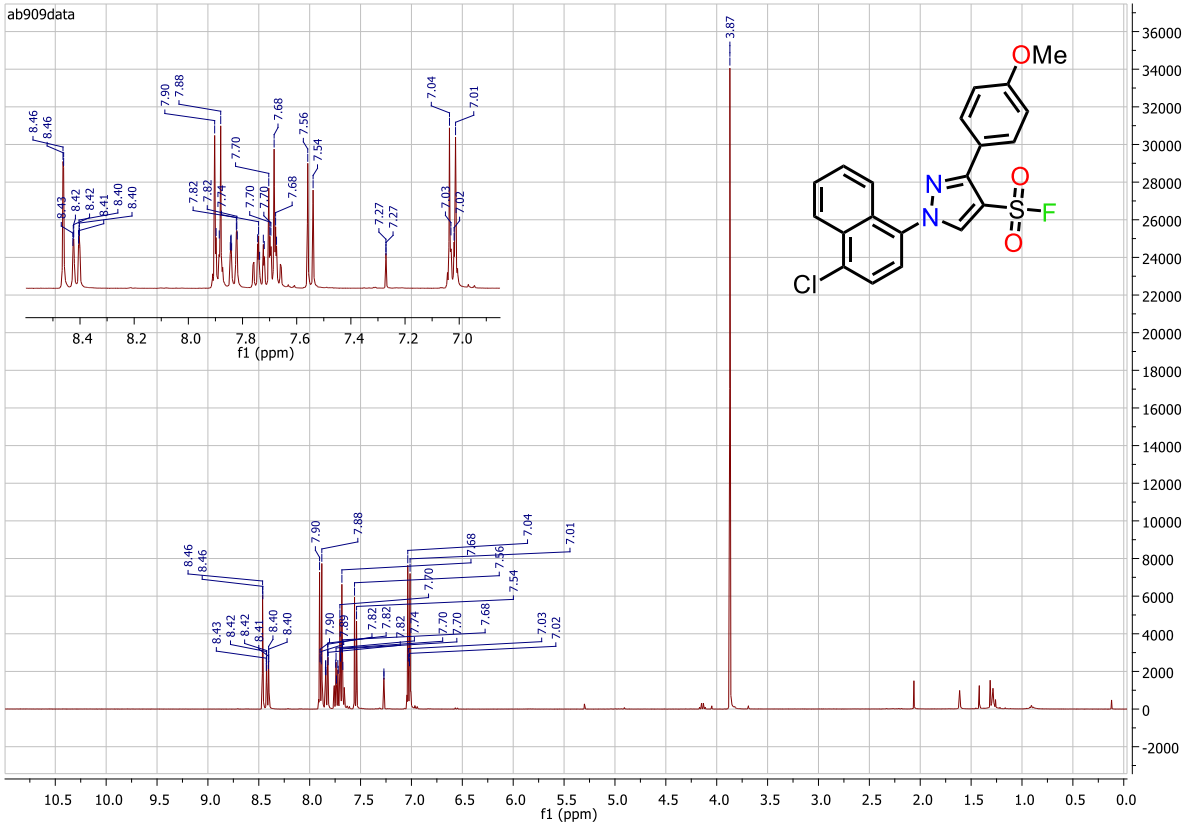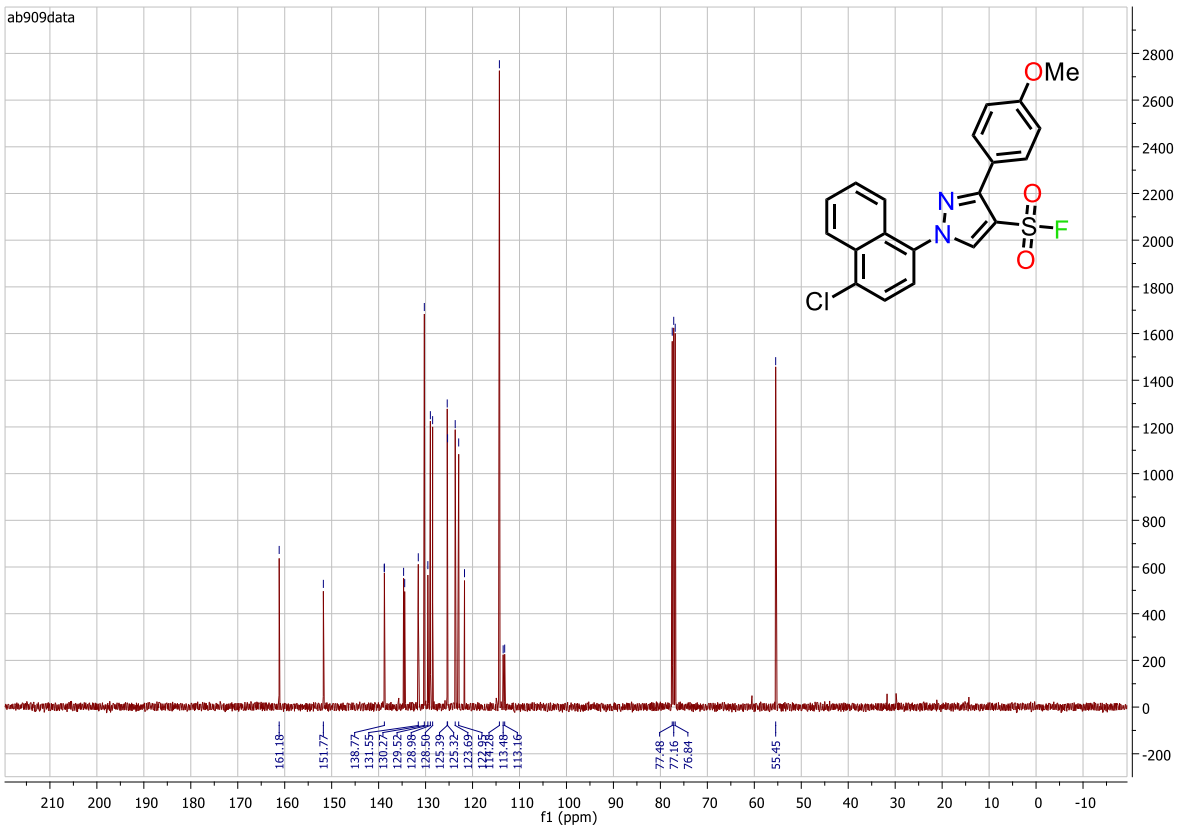

ab909-2col

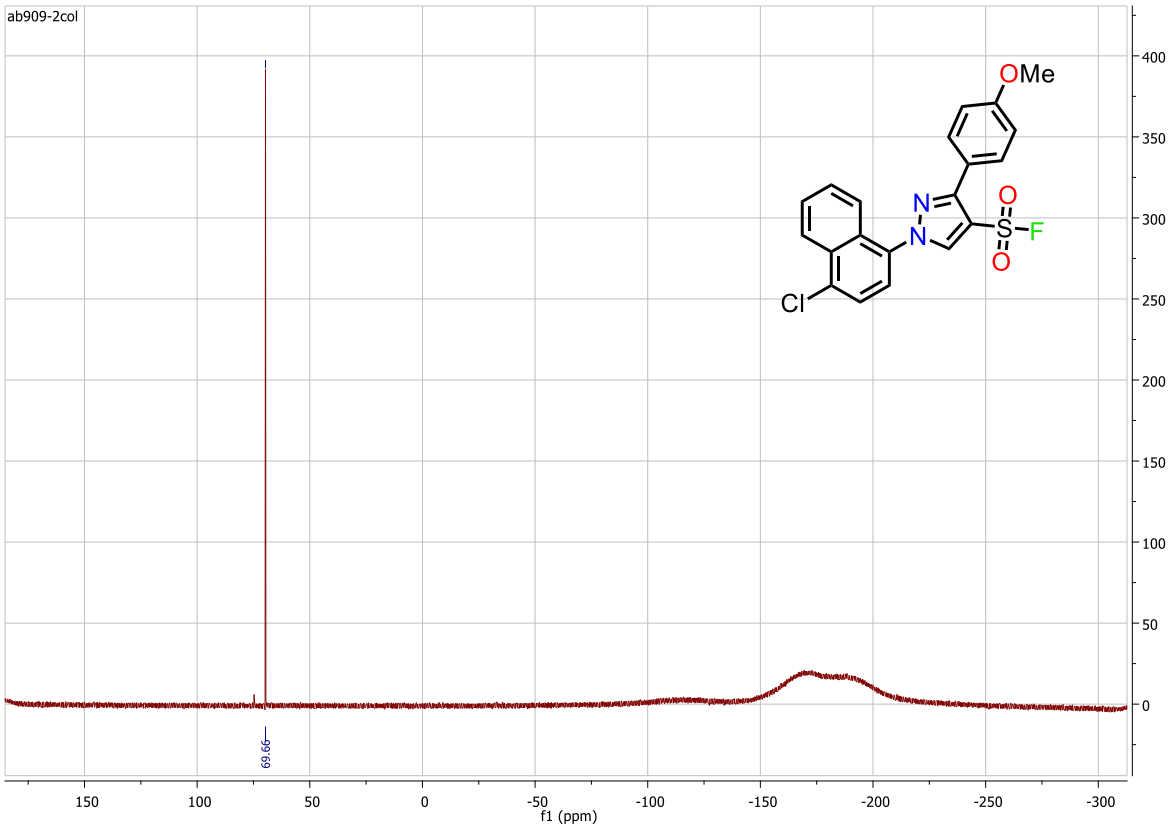

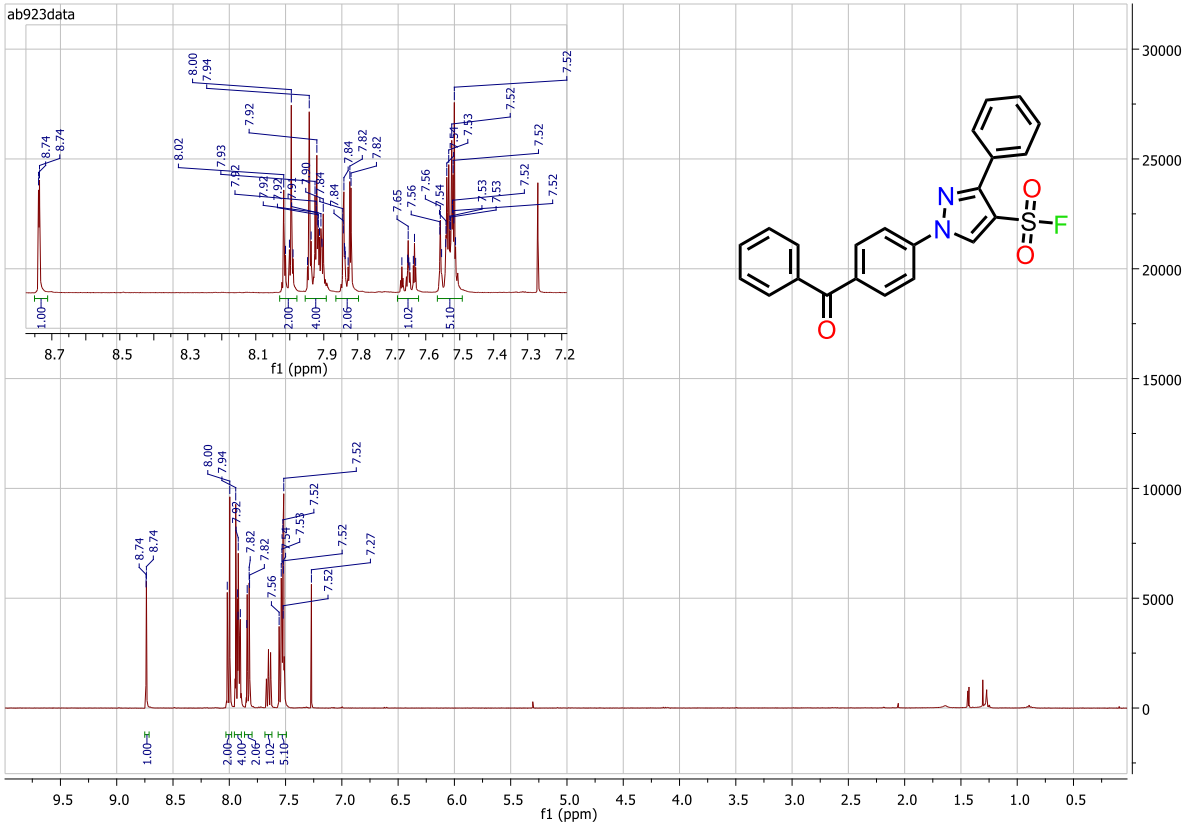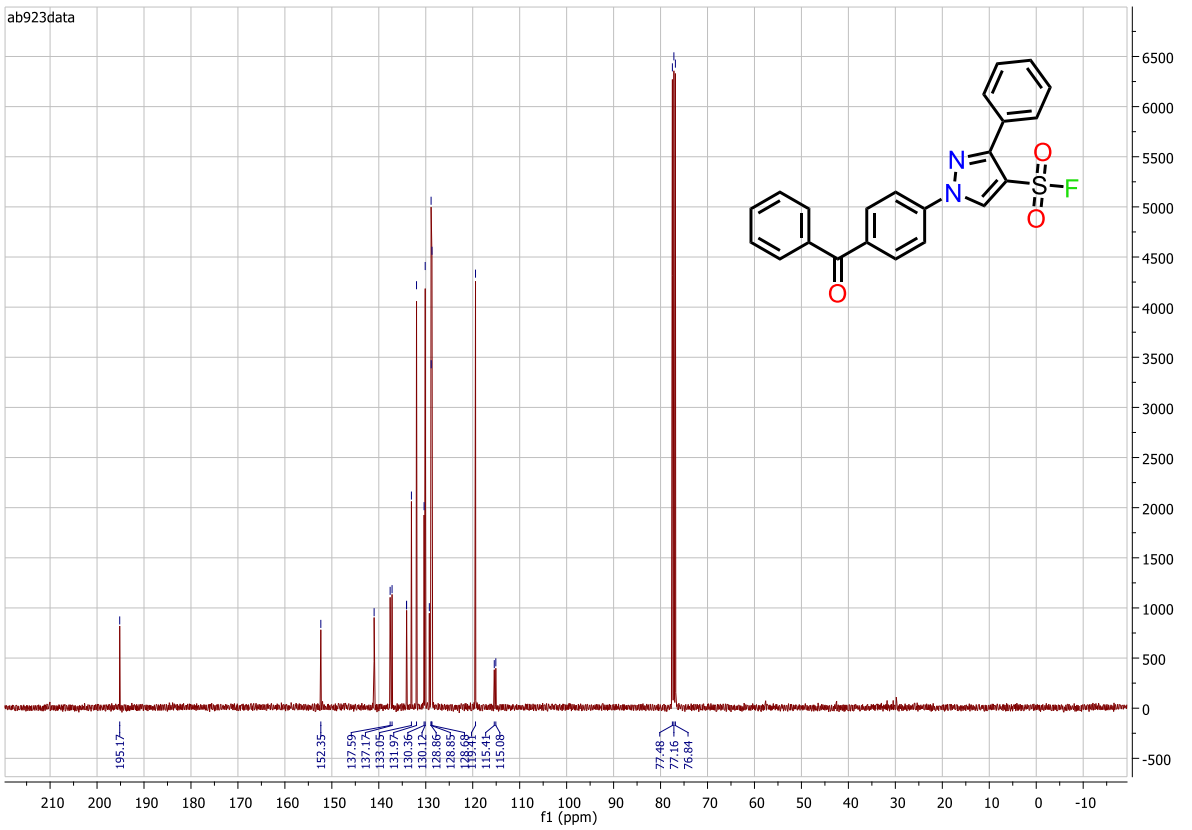

ab923data

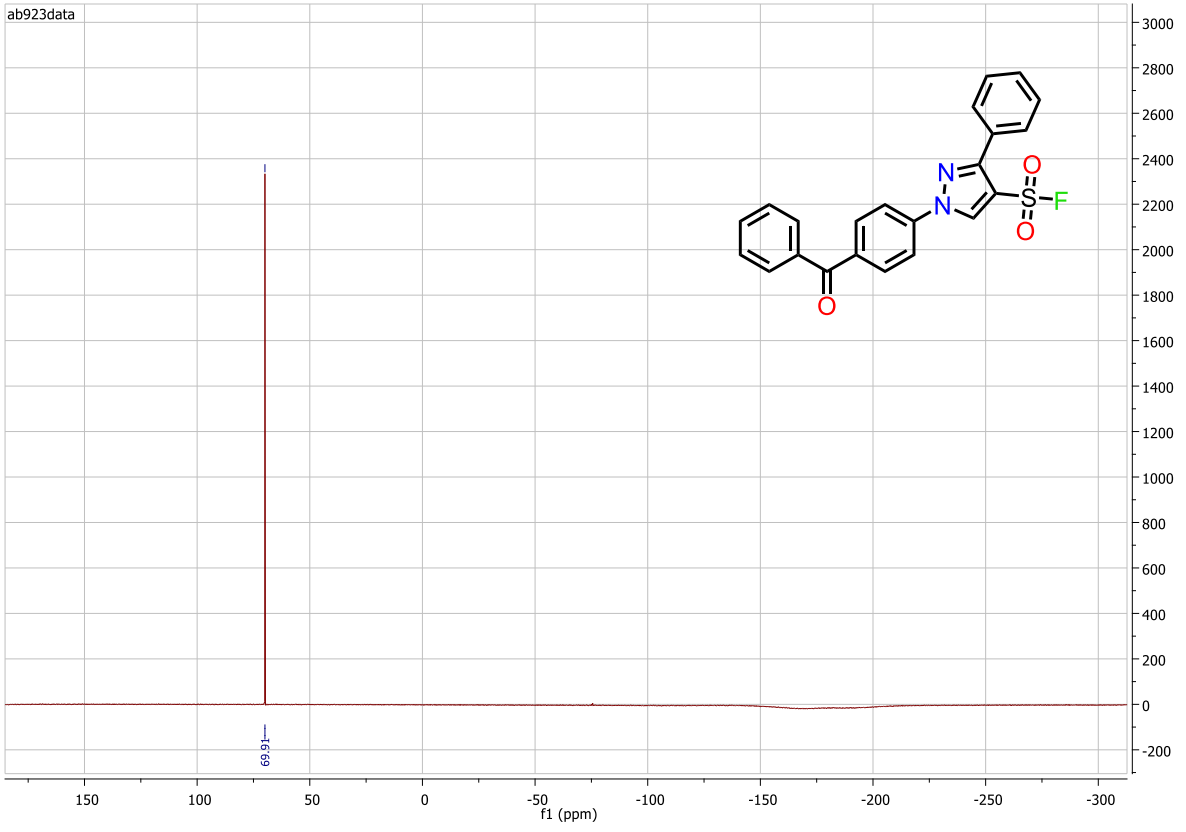



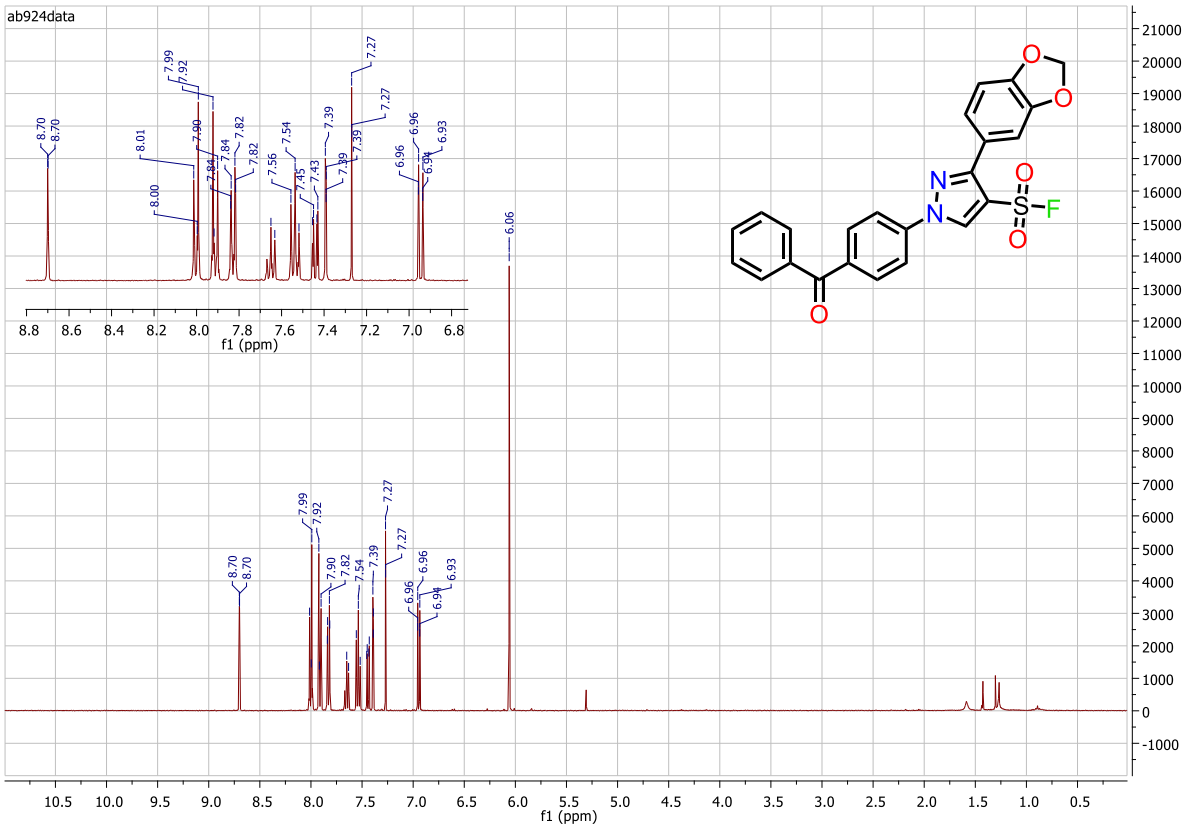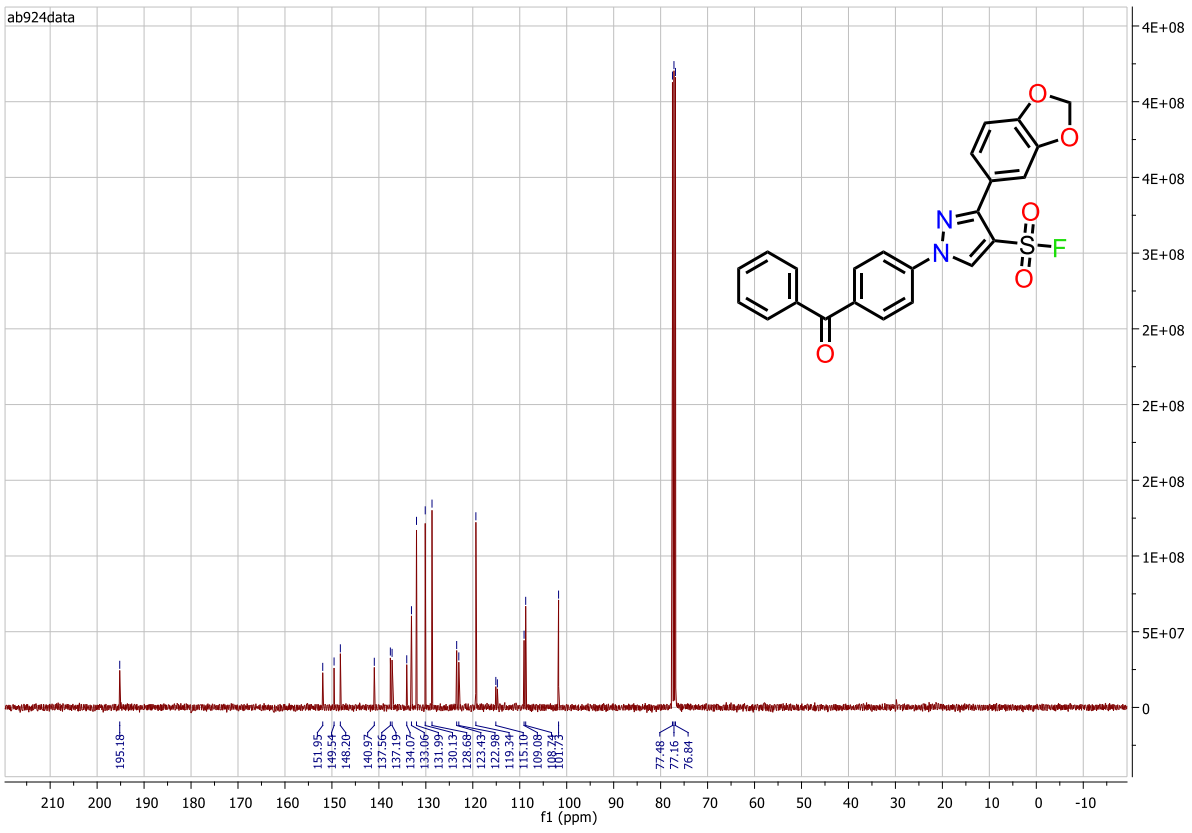

ab924data

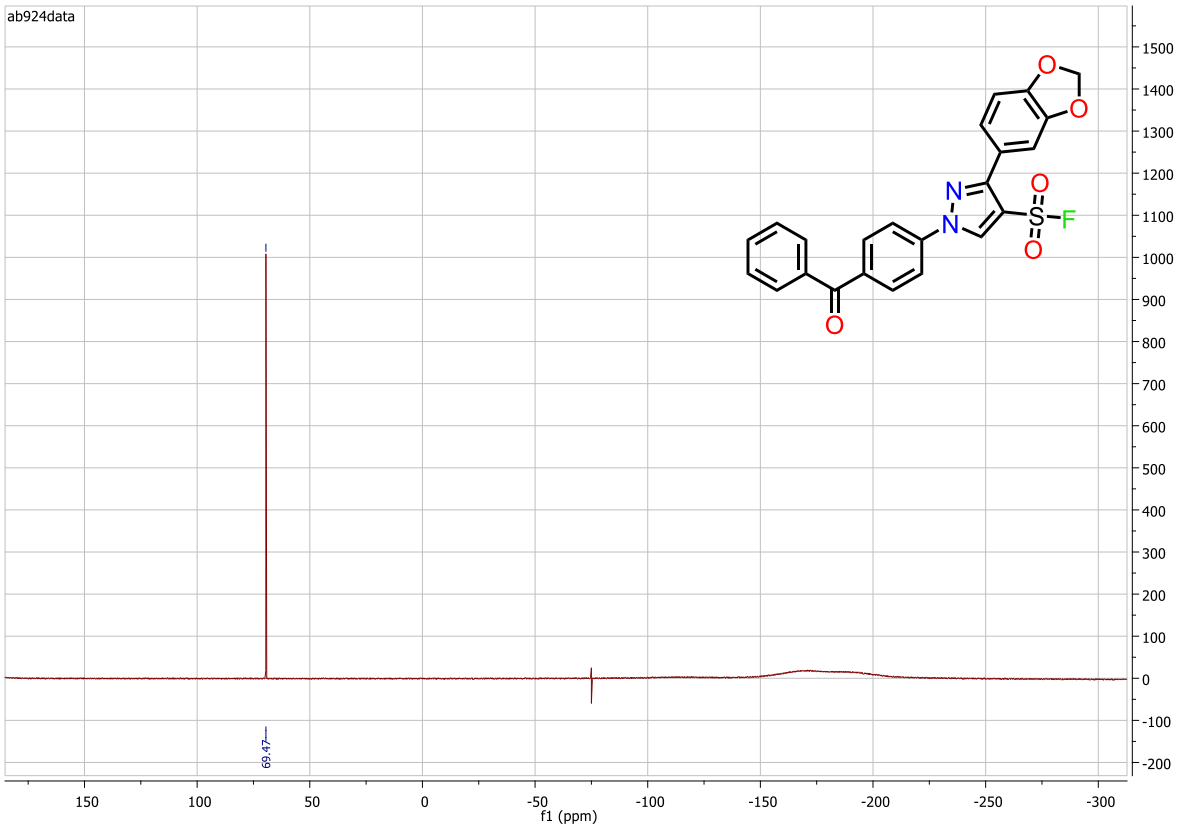

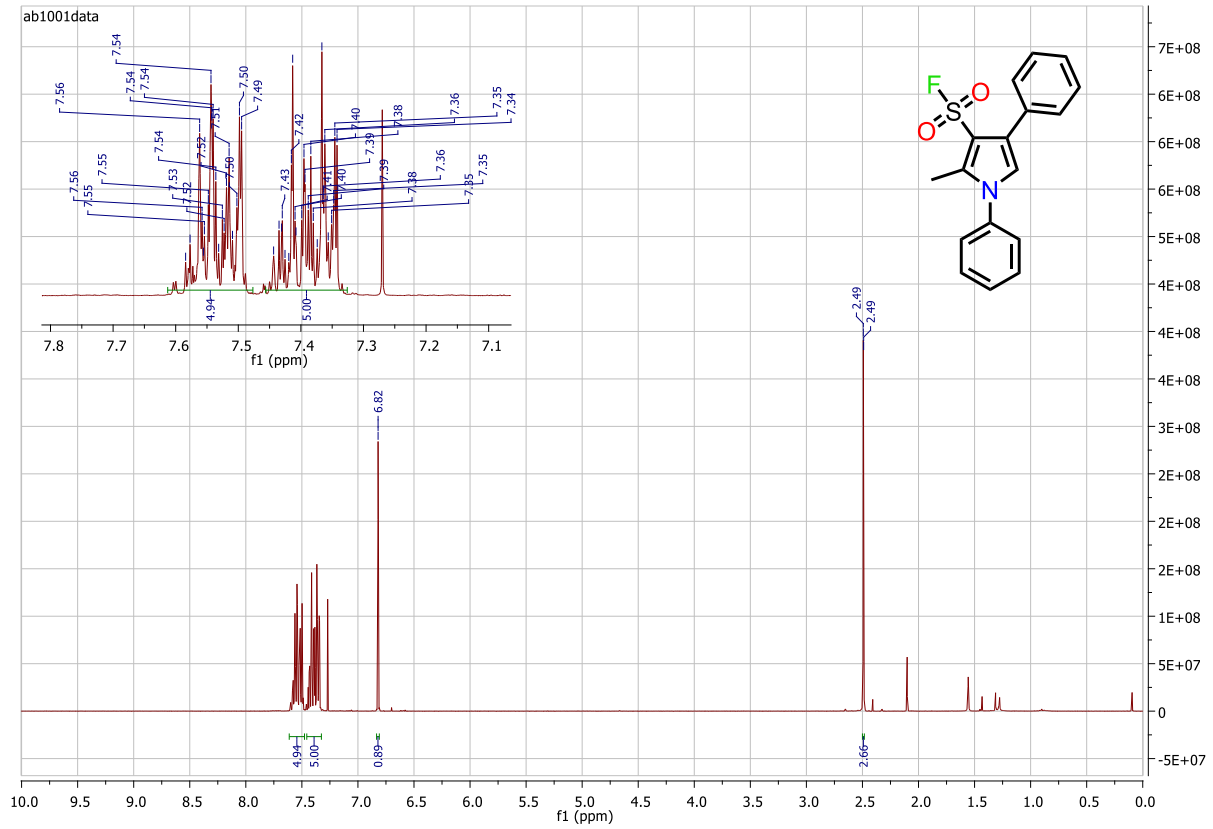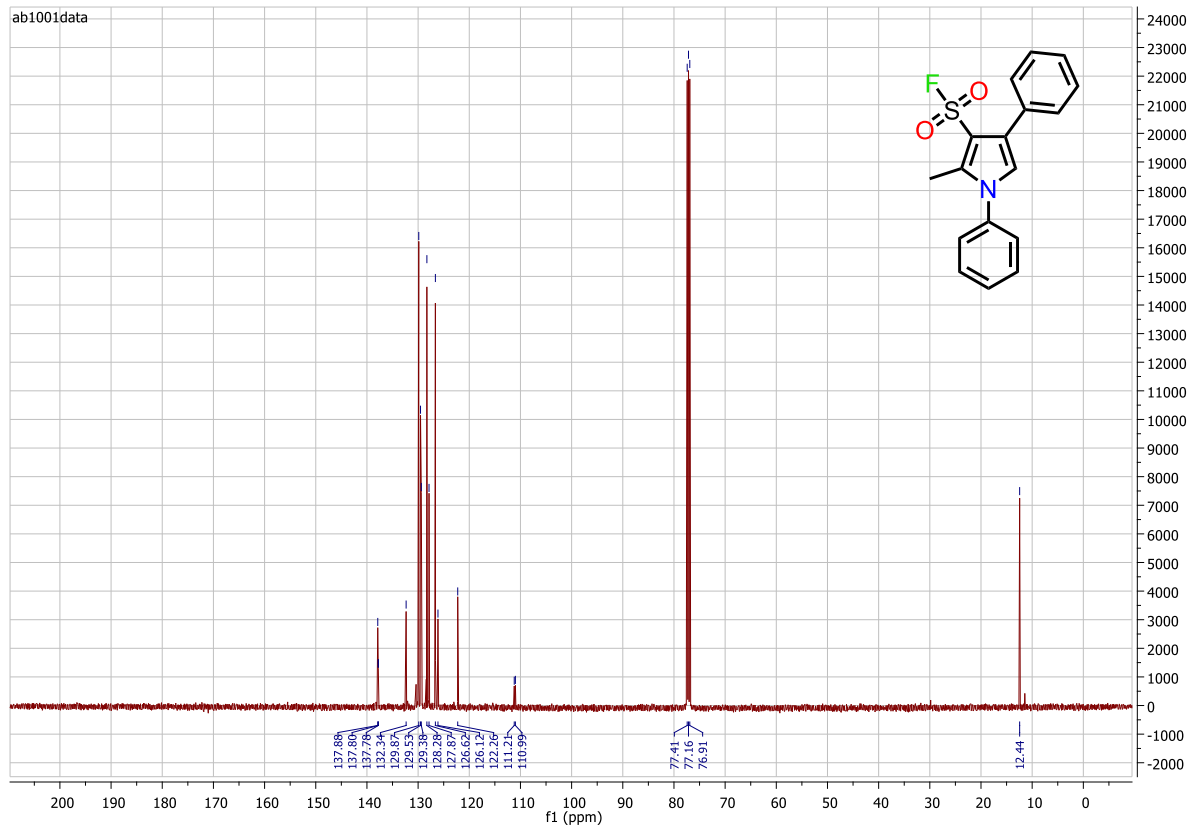

ab1001data

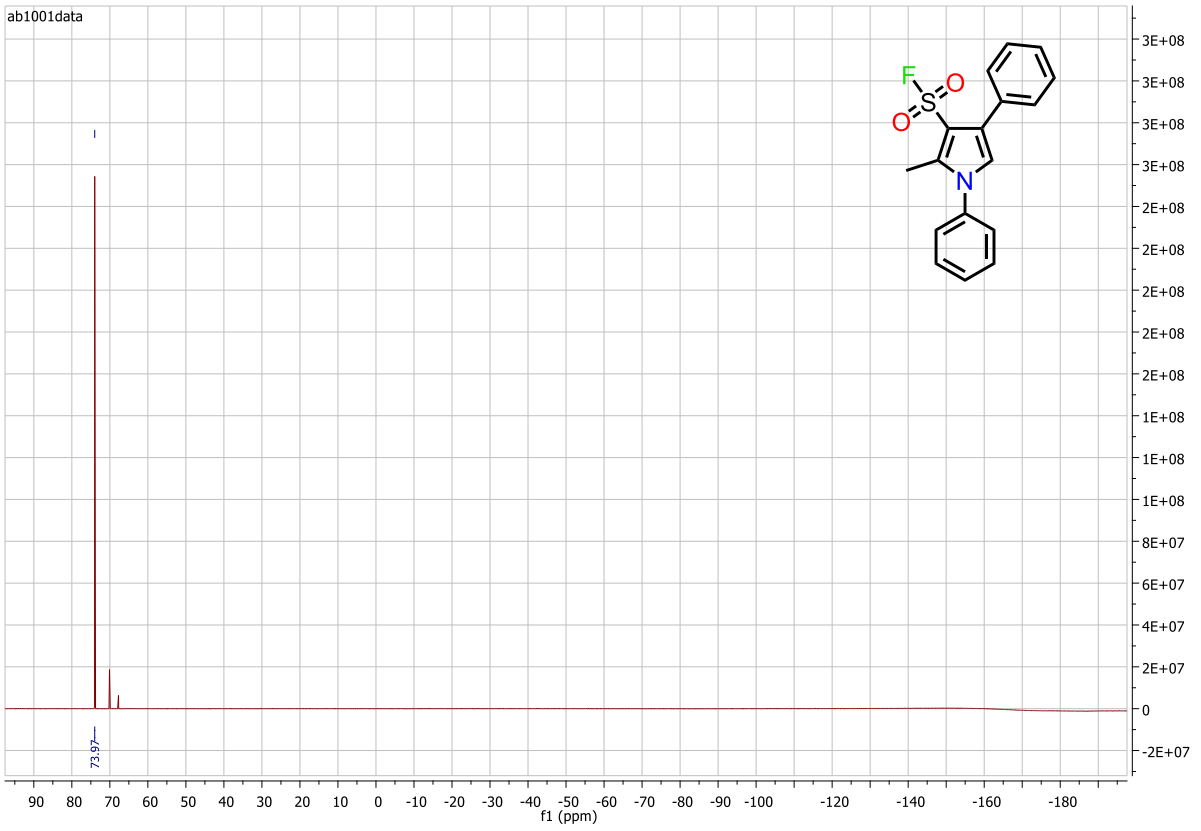

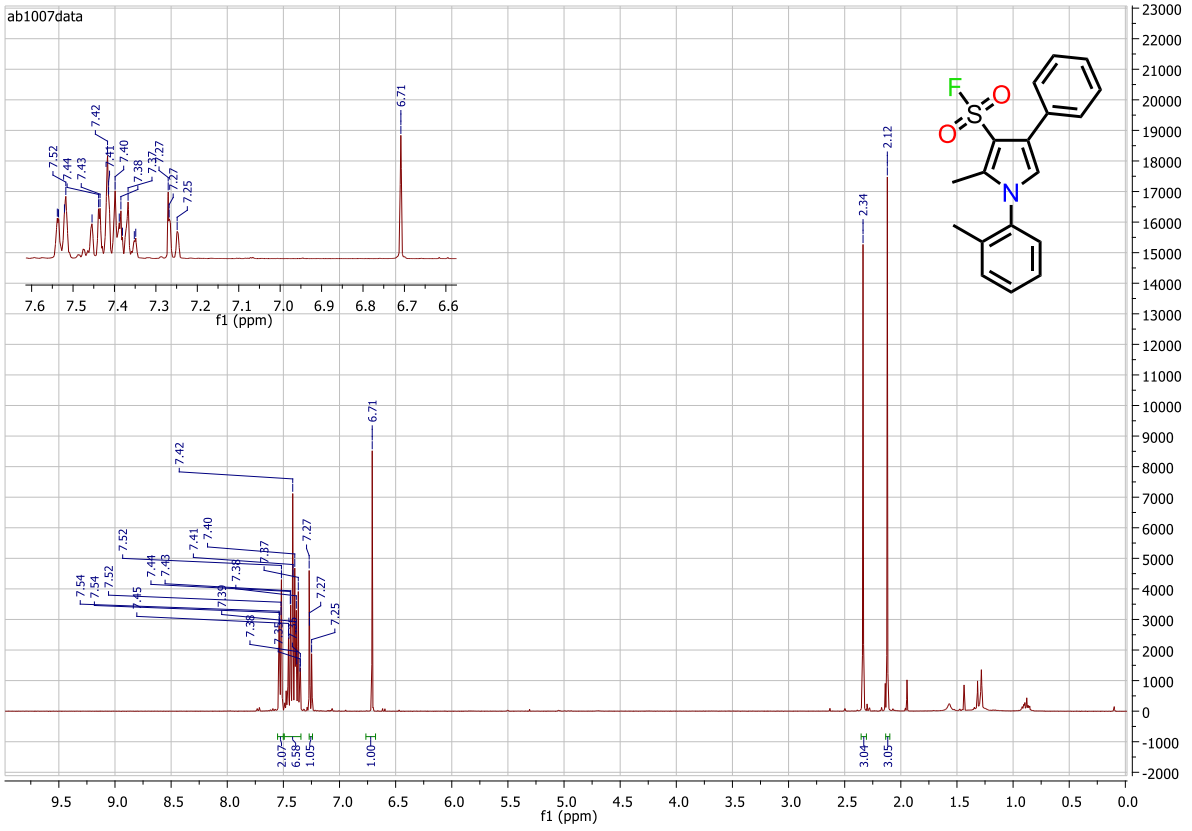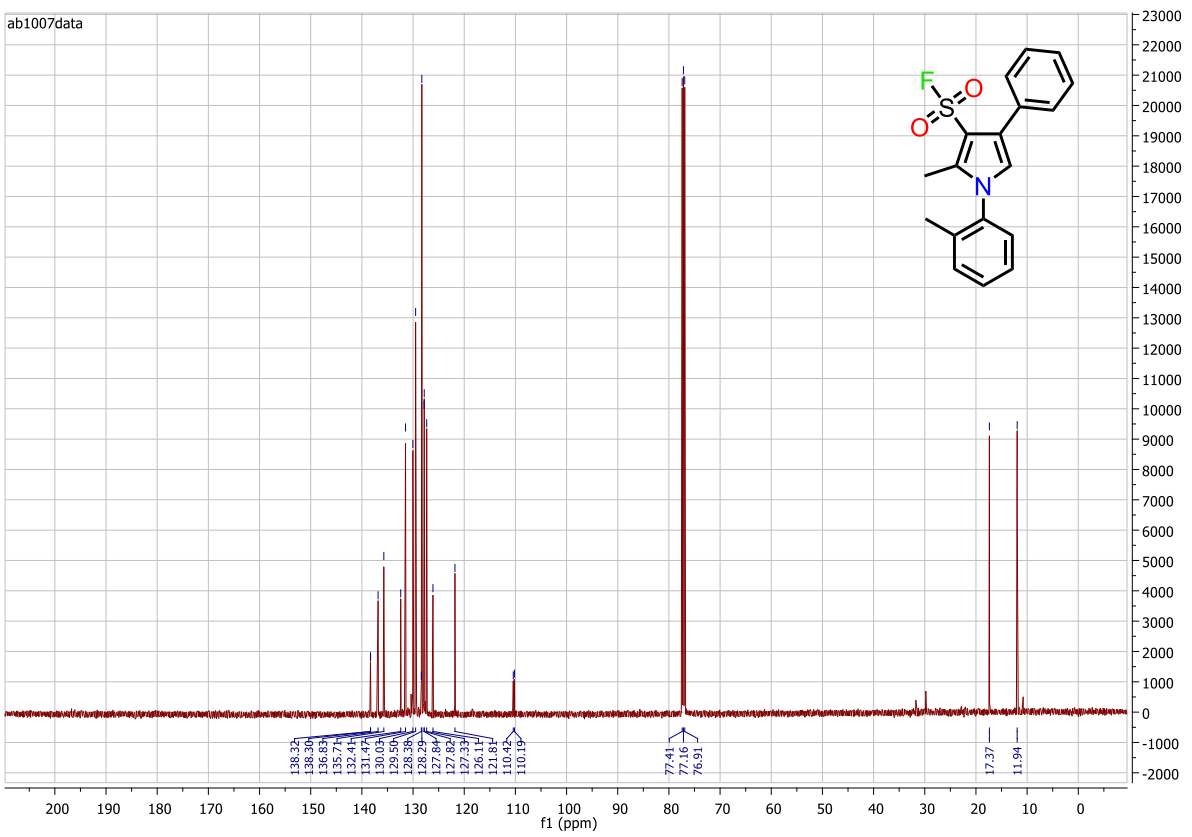

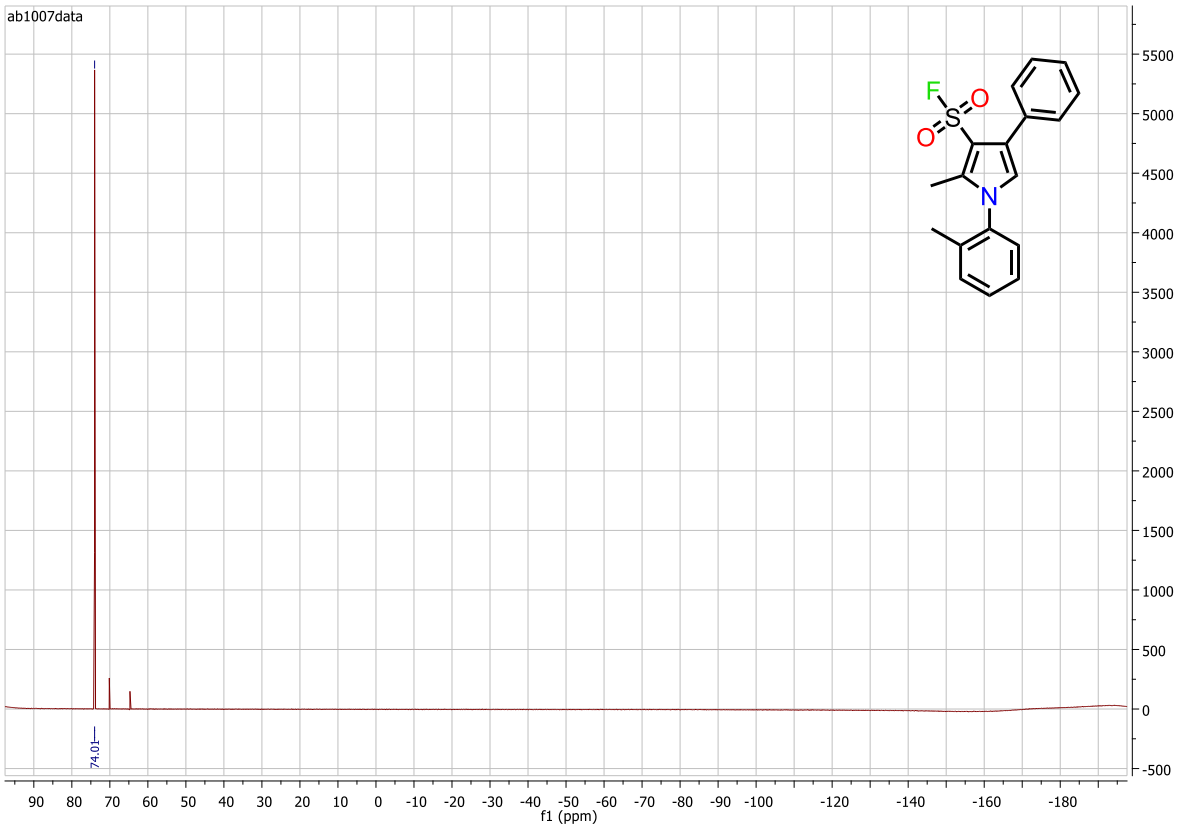

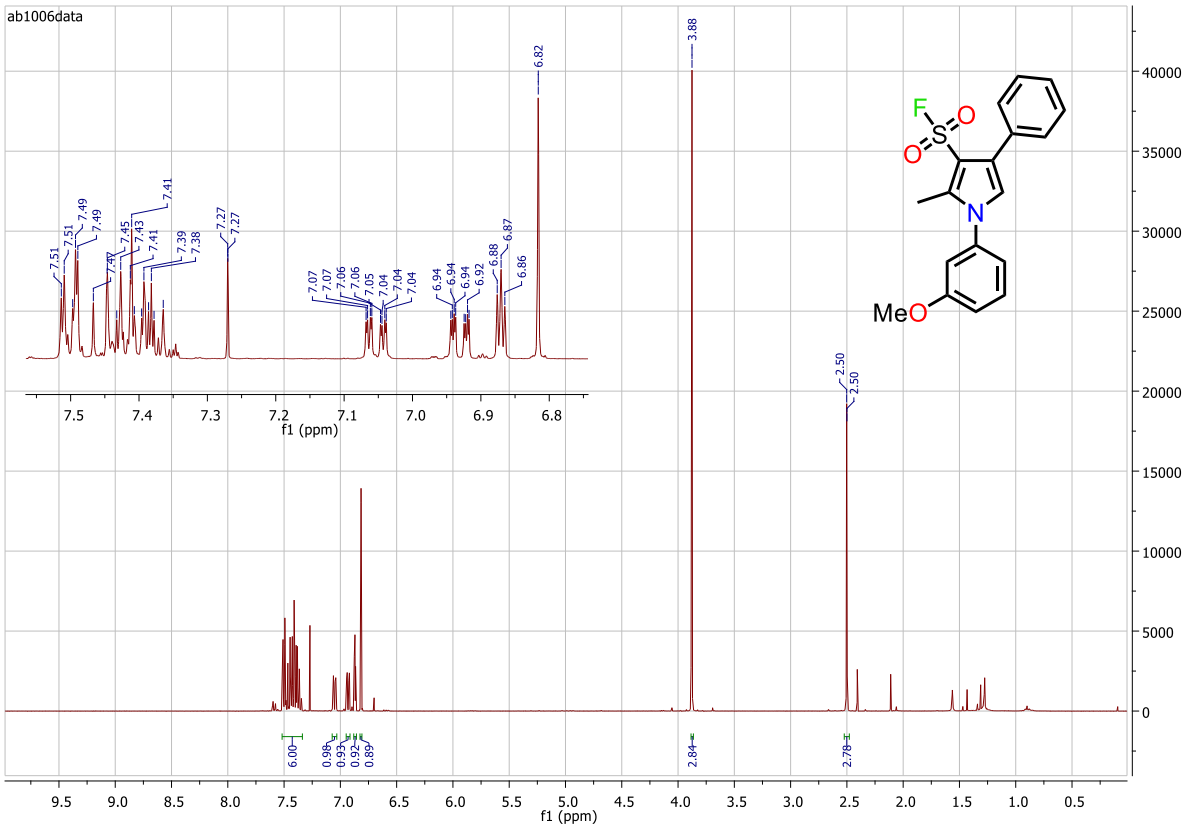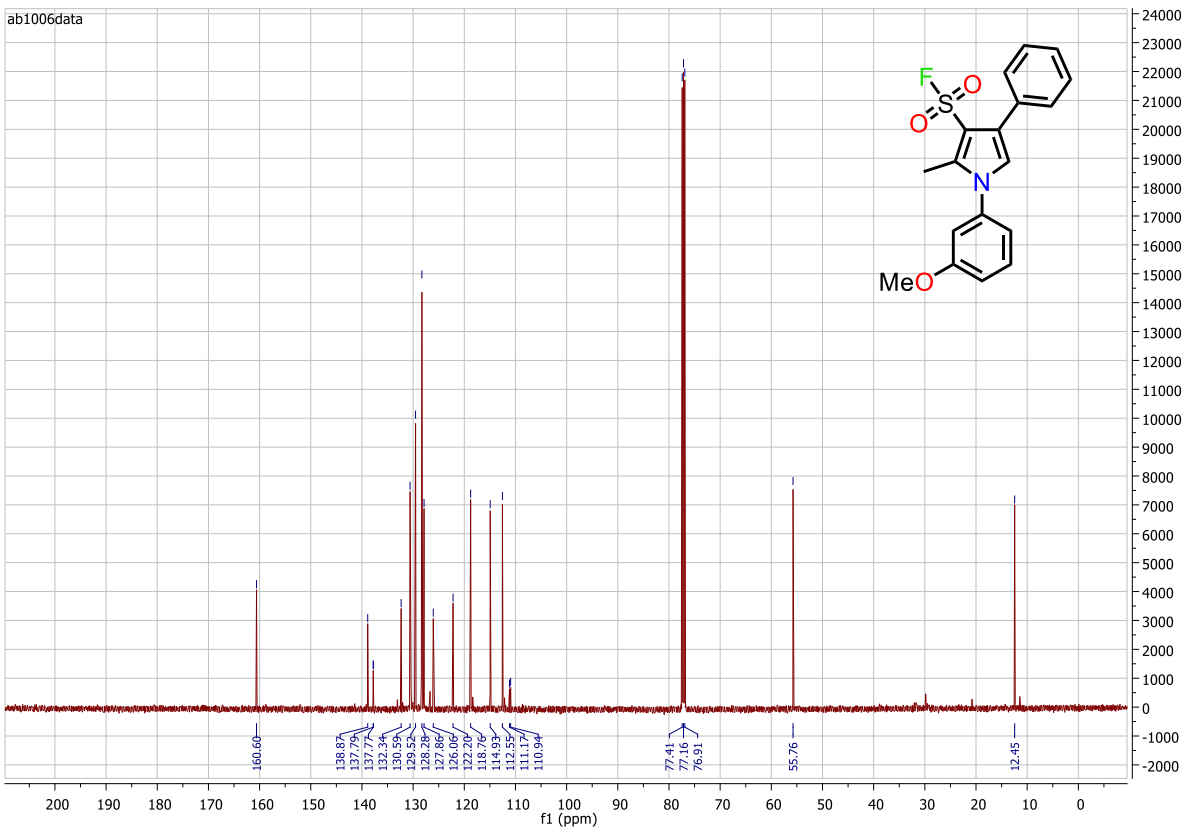

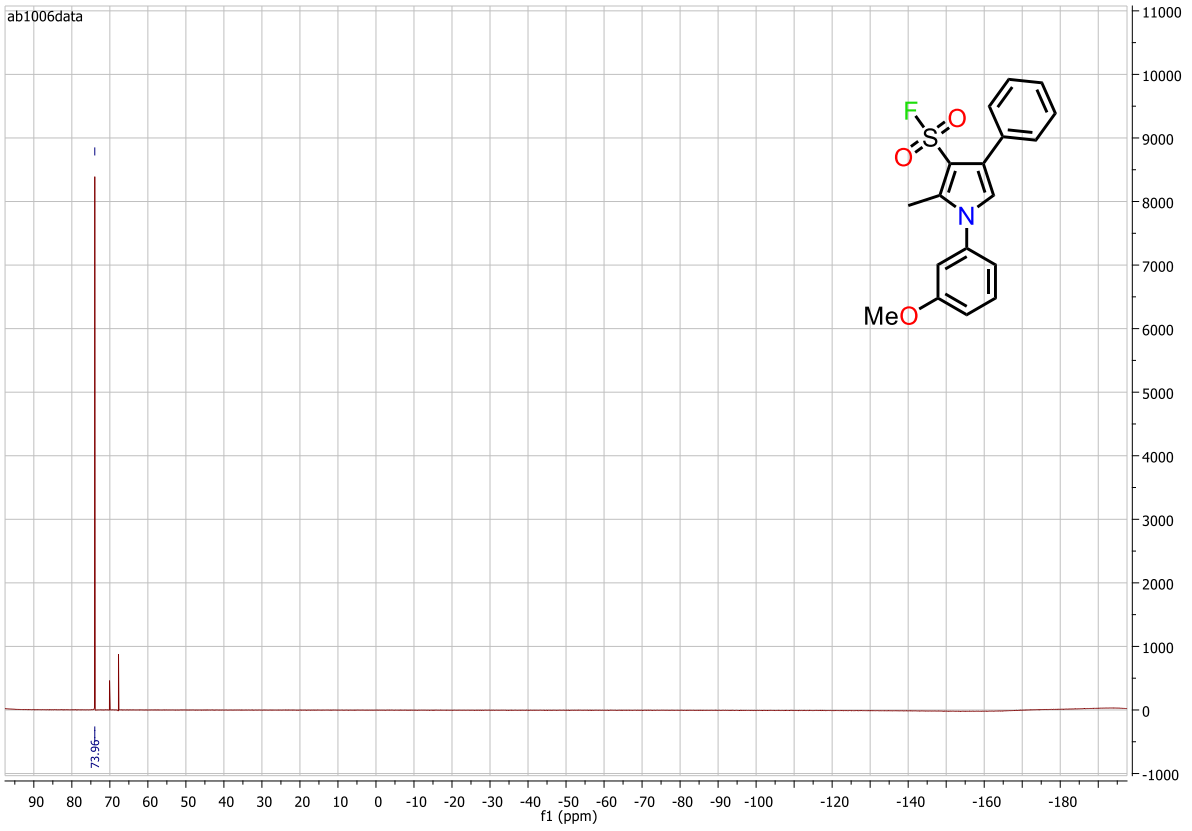



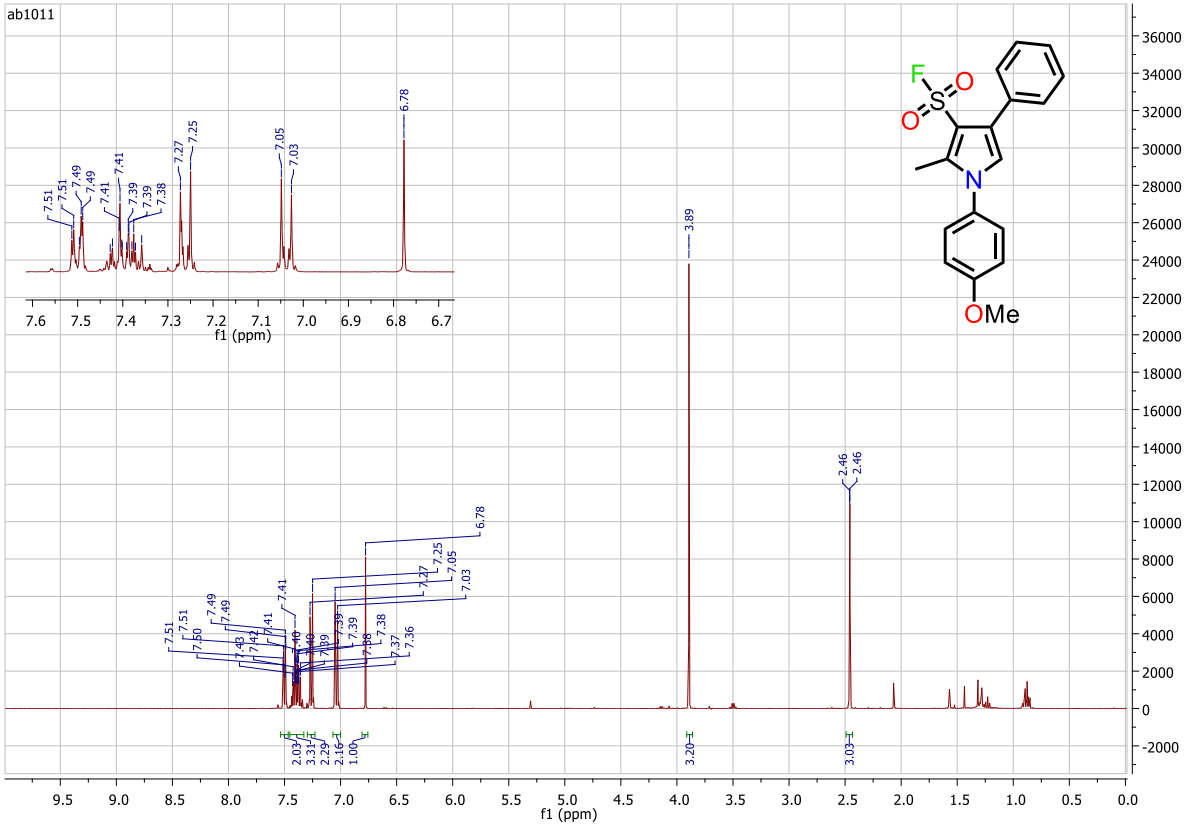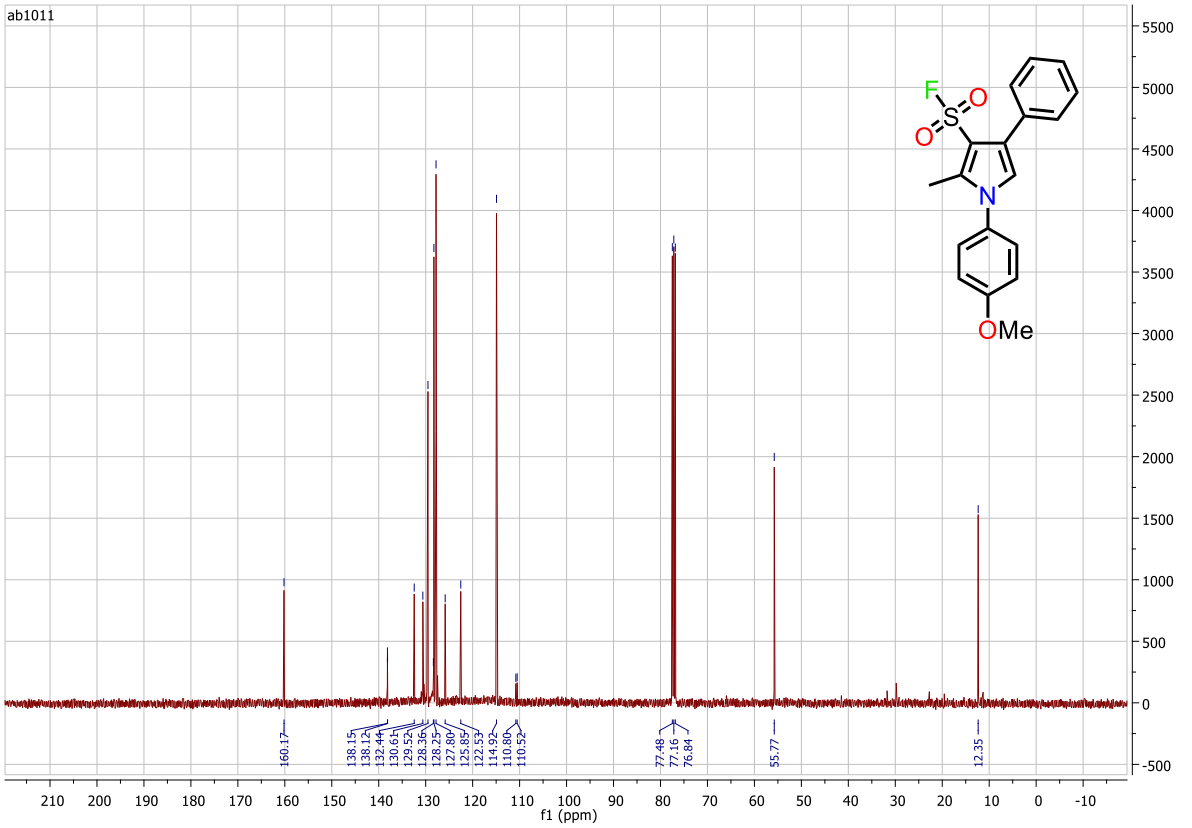

ab1011data

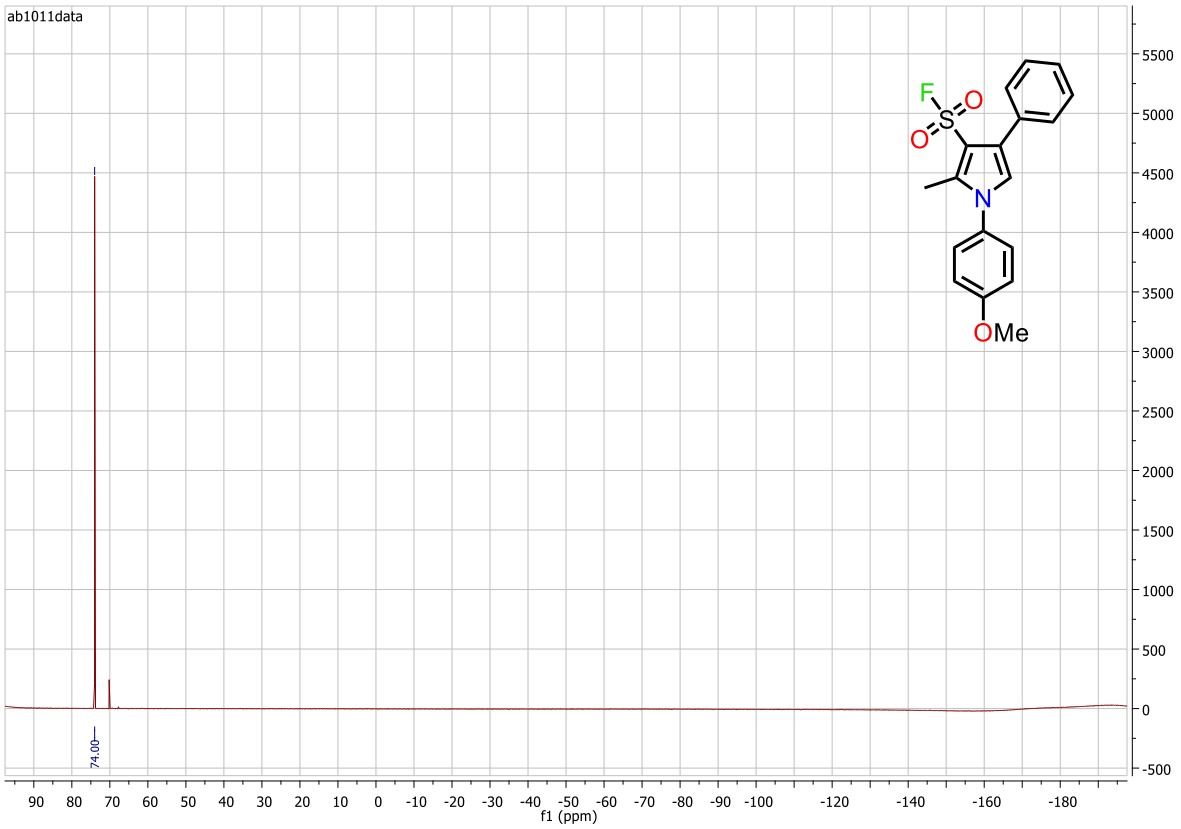

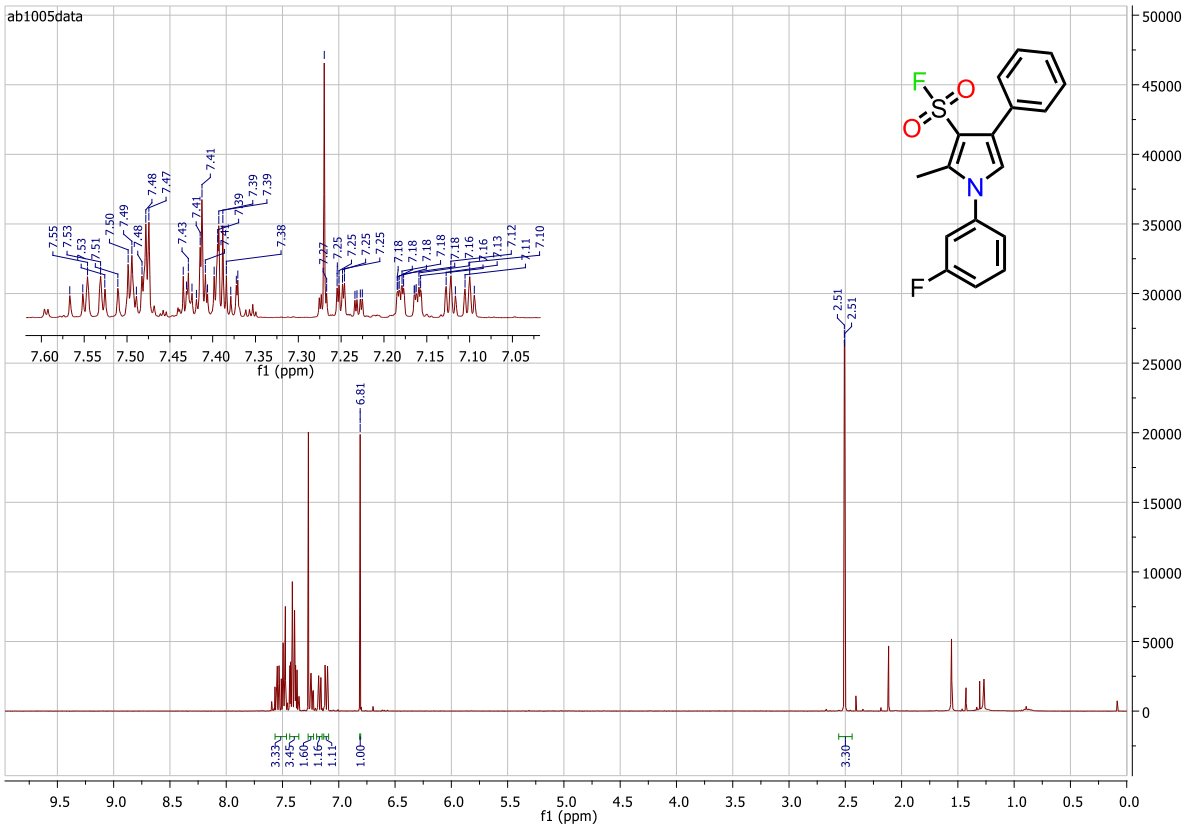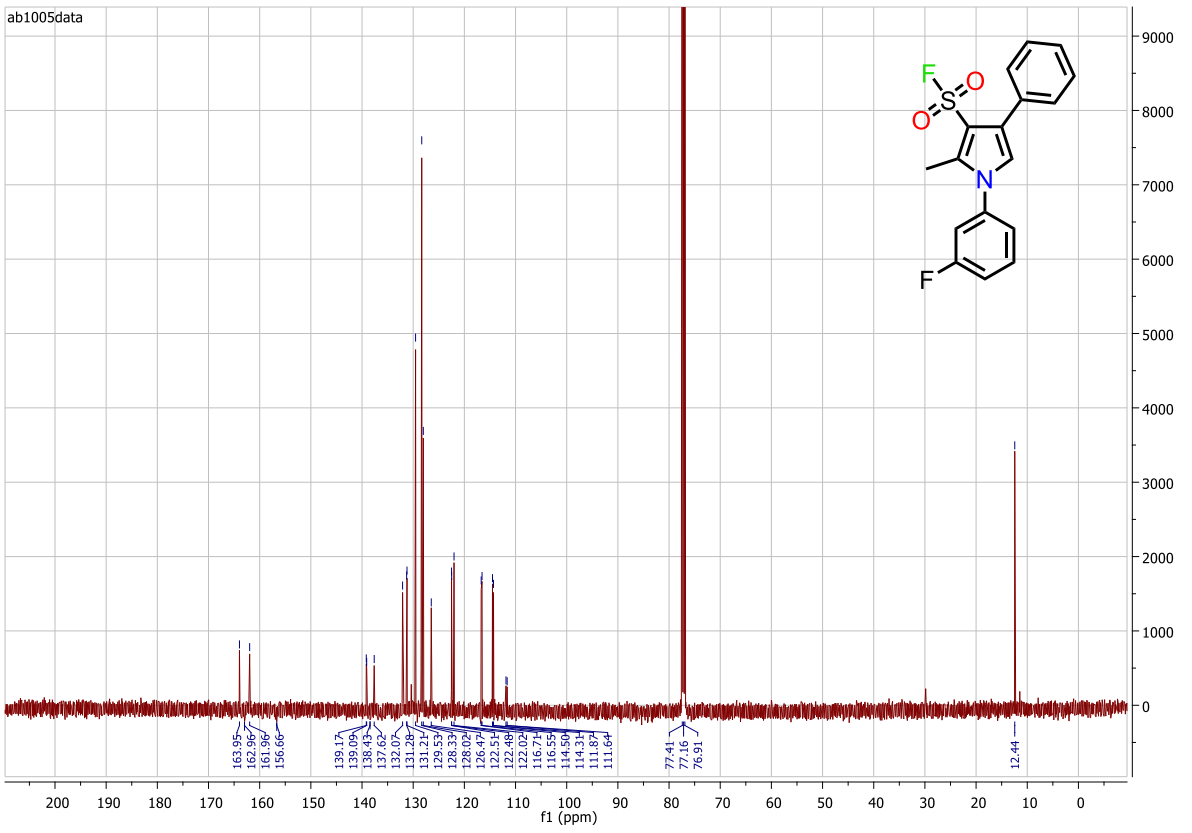

ab1005data

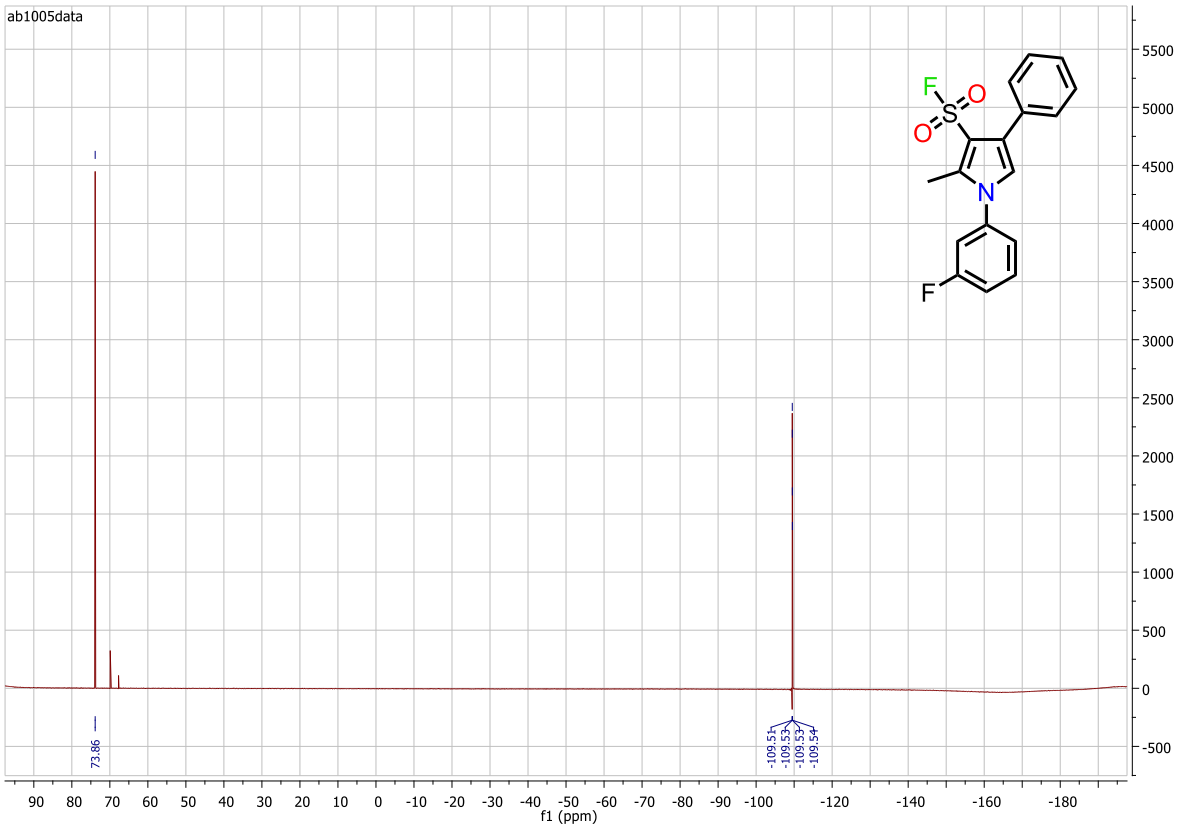

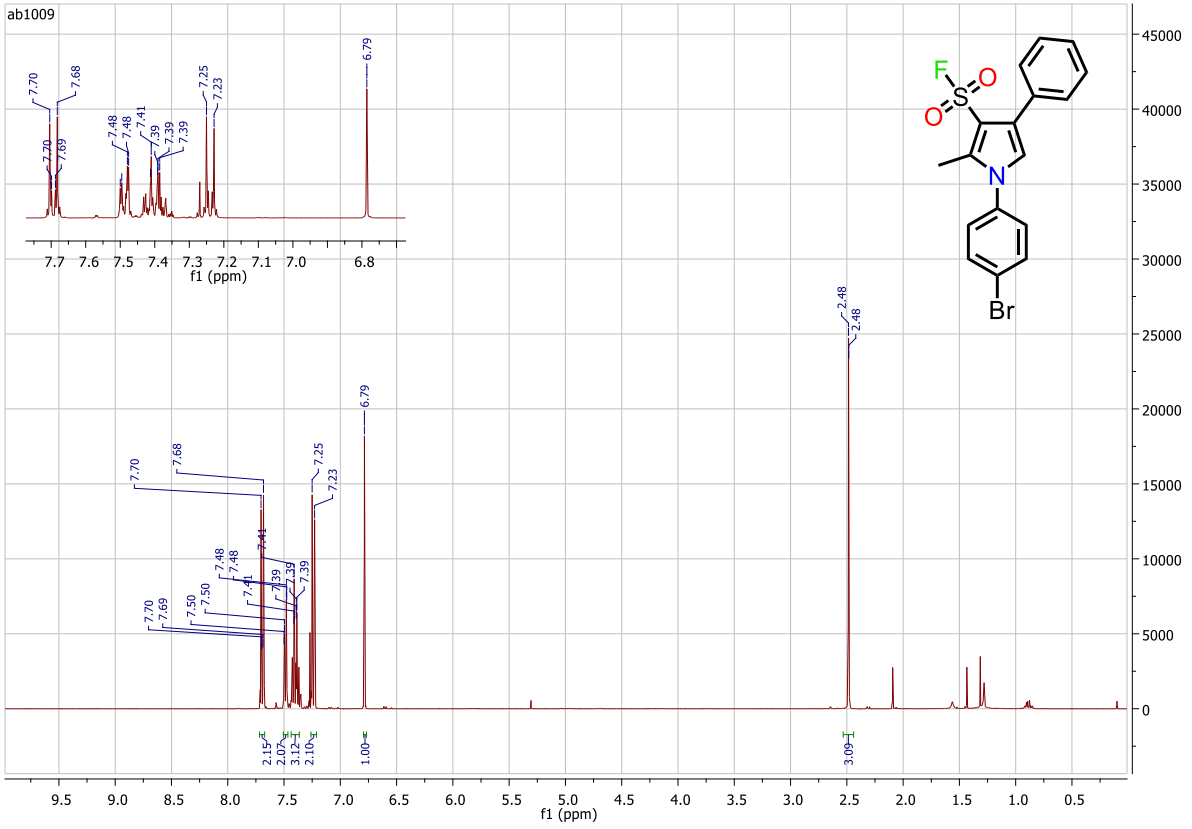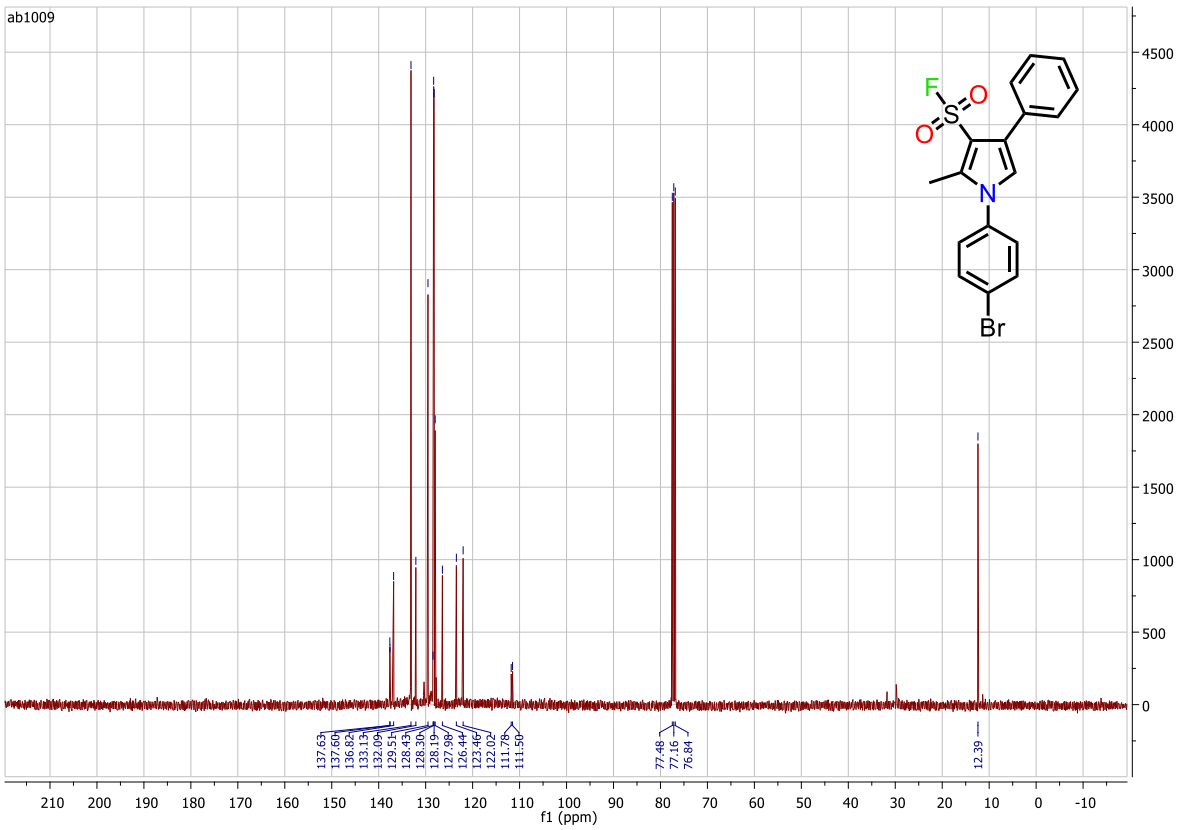

ab1009data

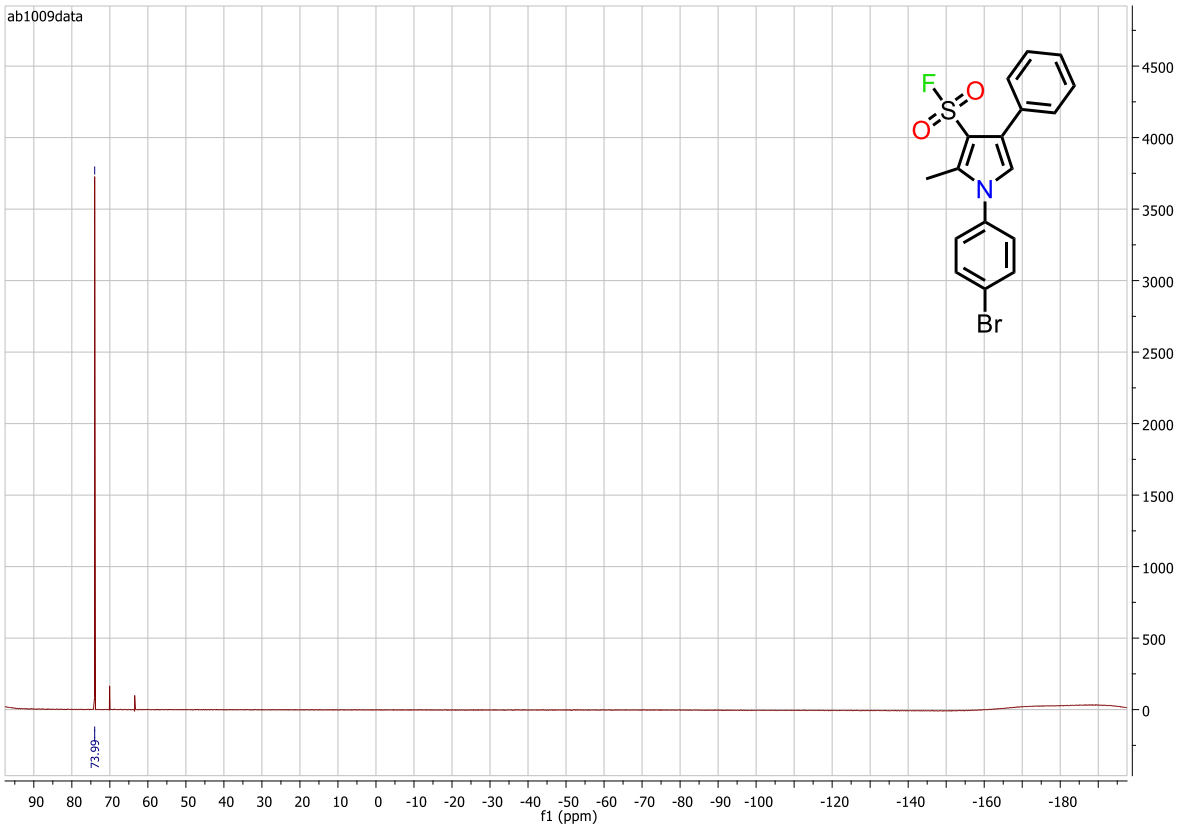

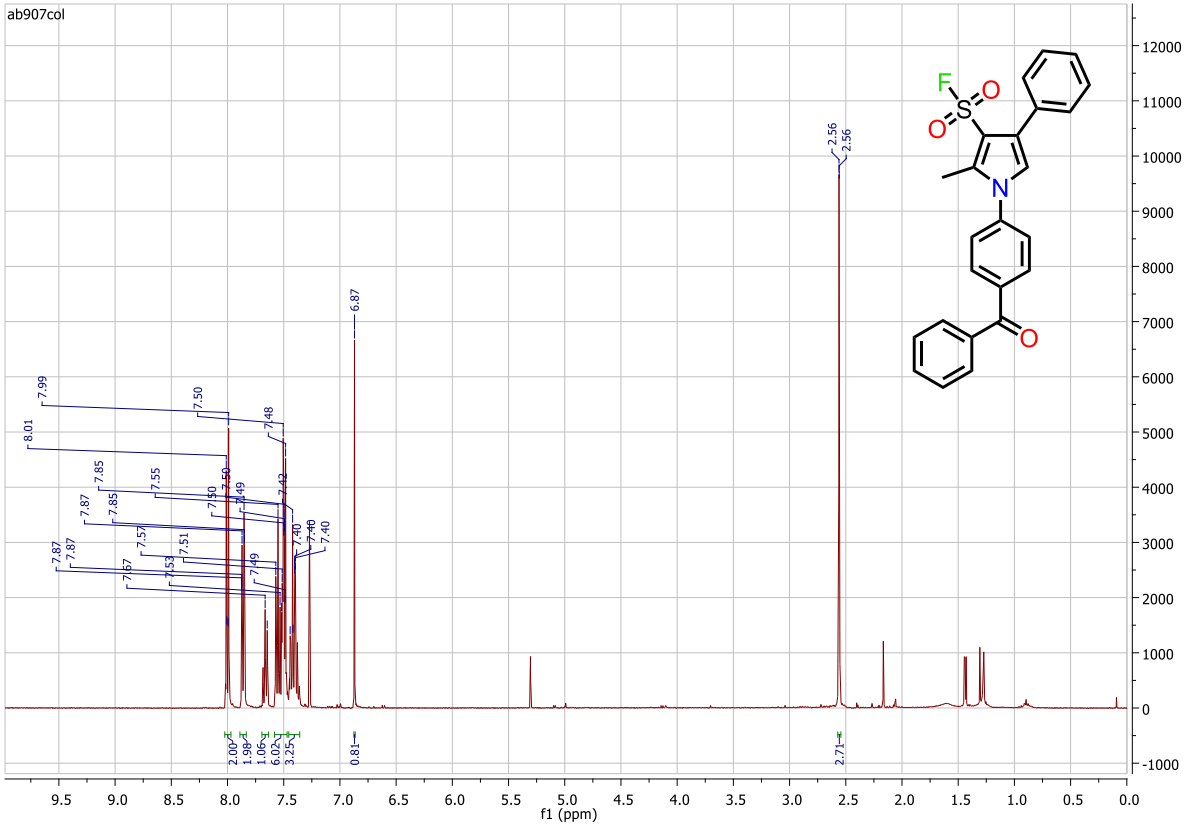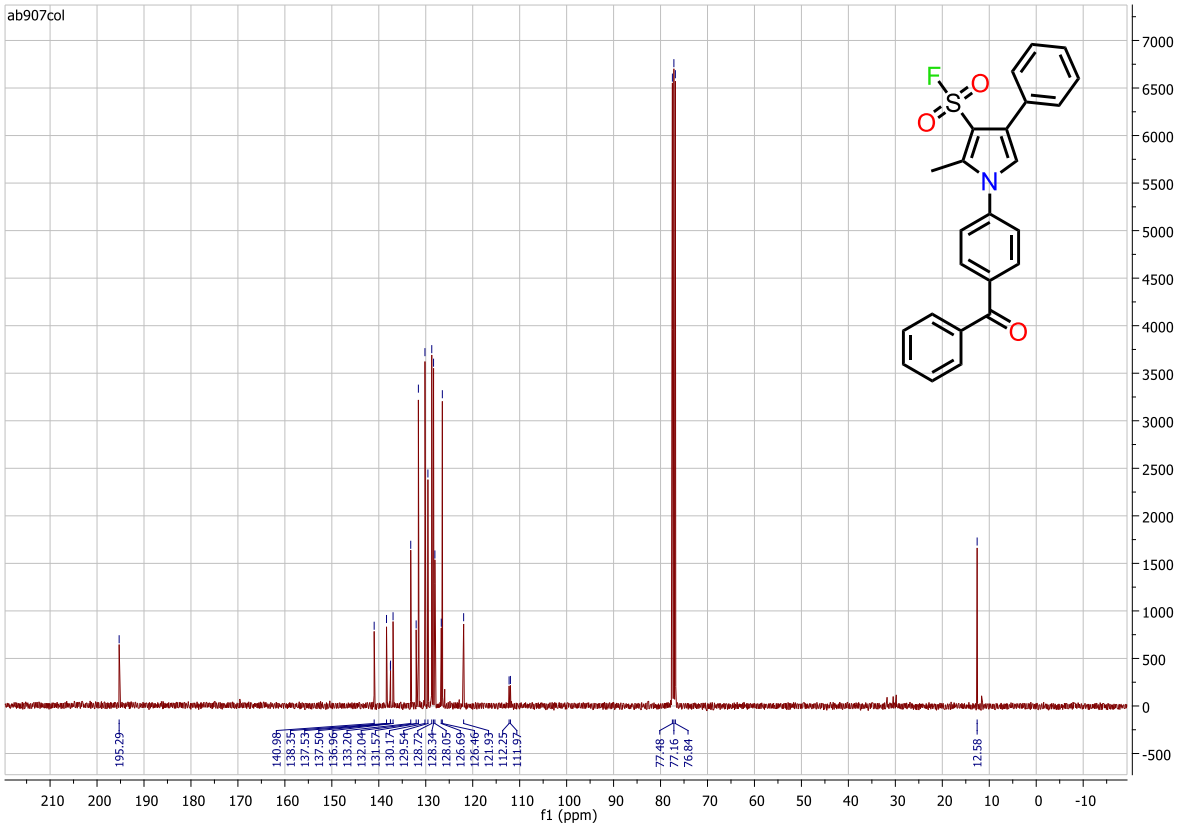

ab907col

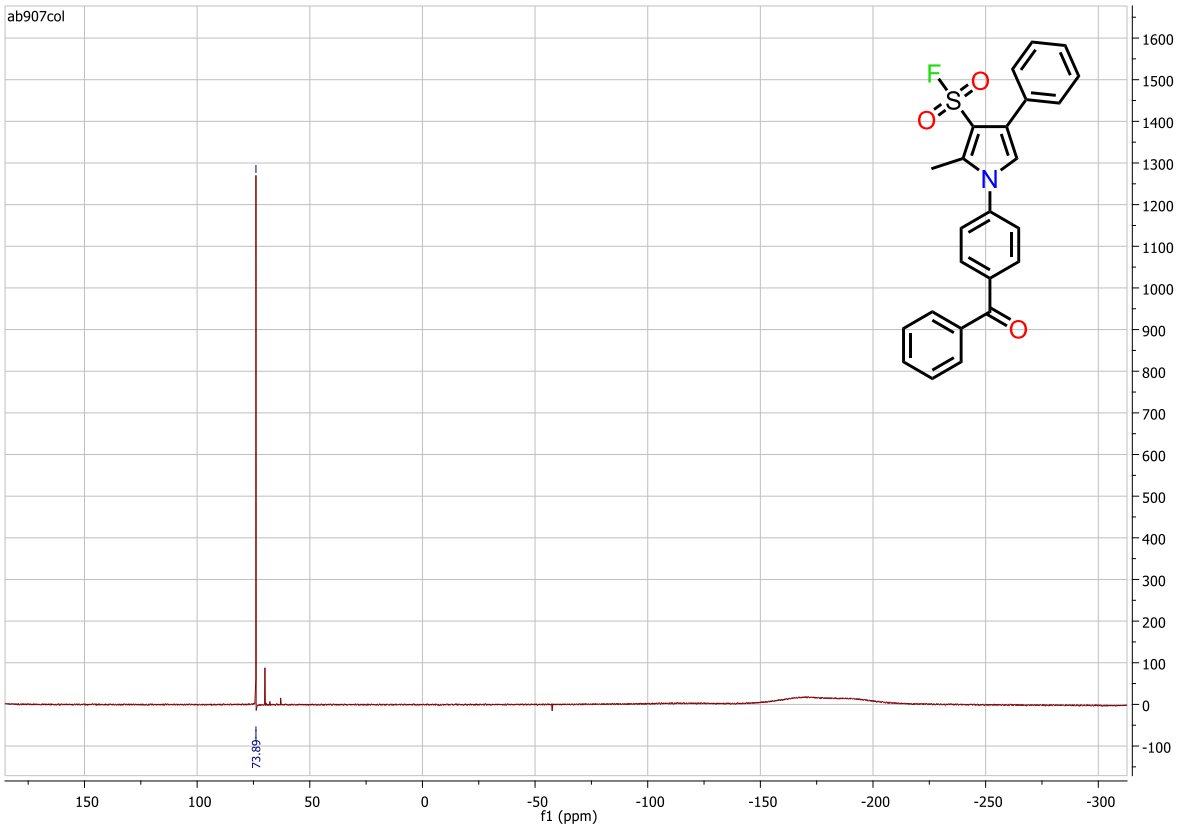



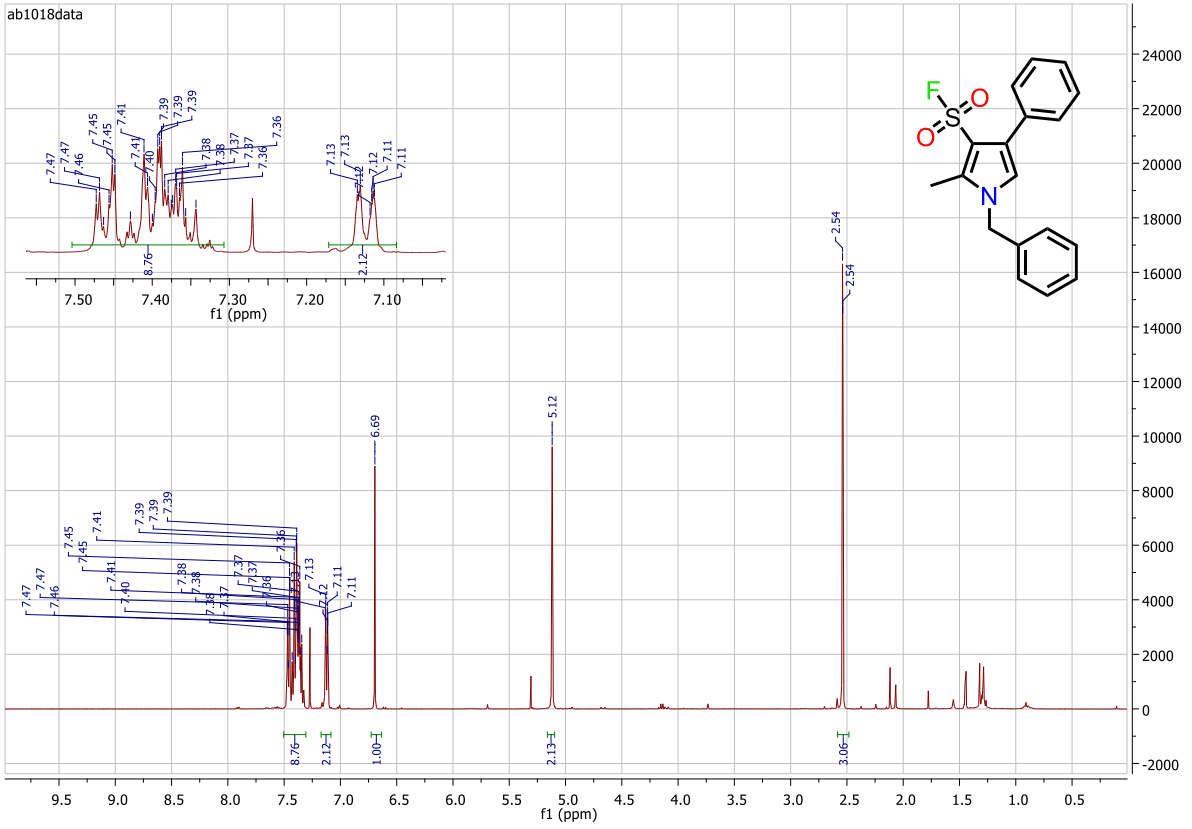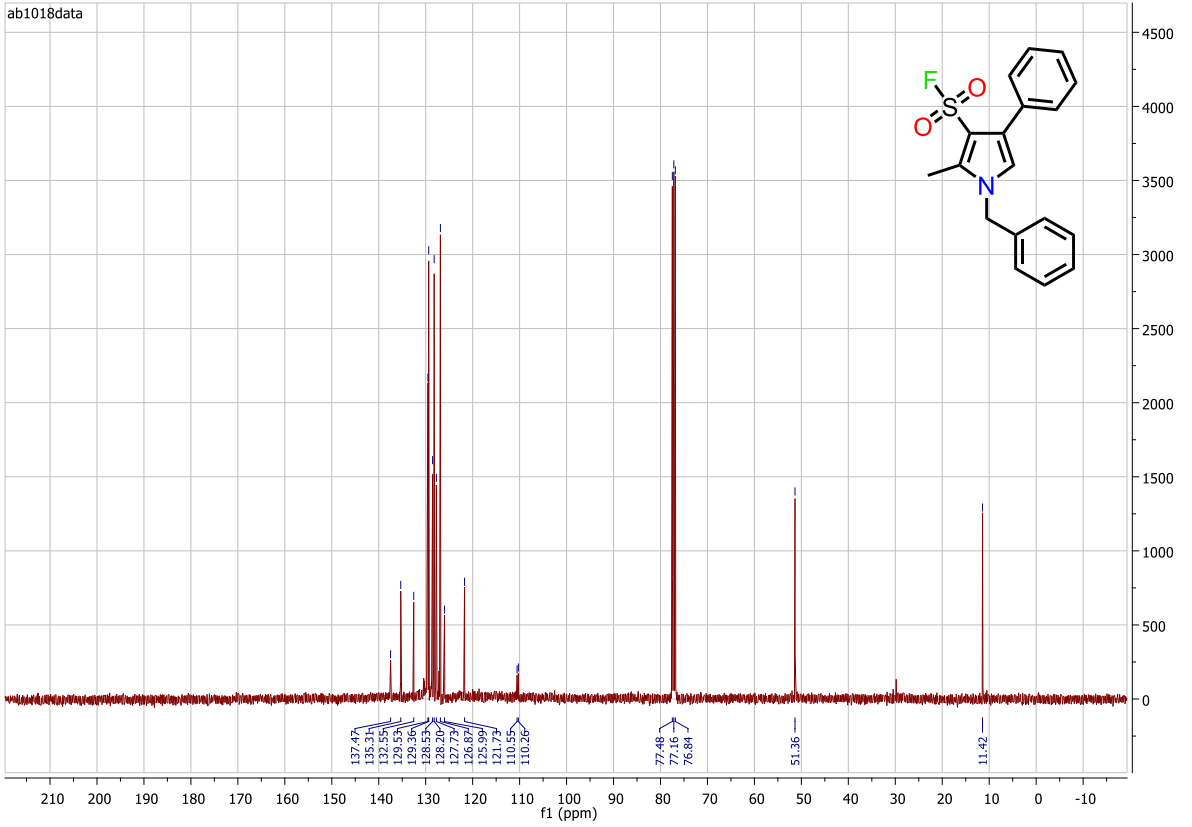

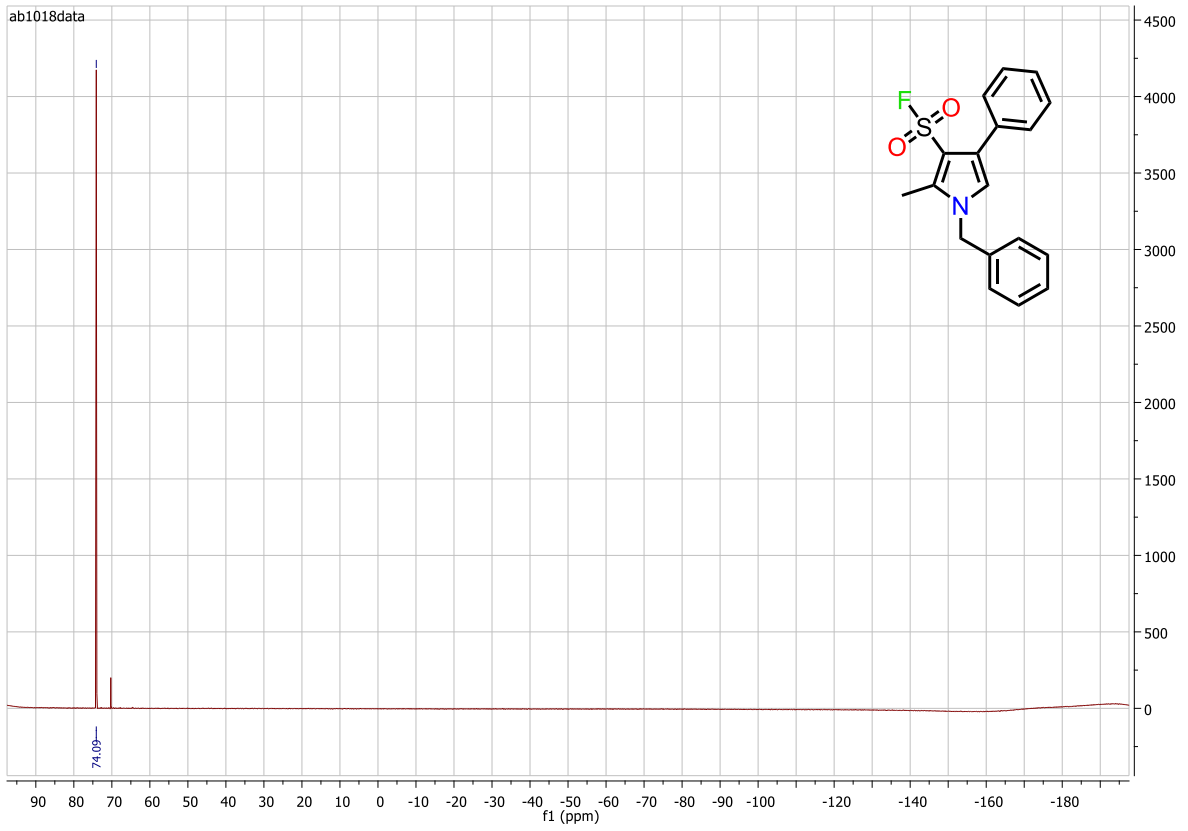

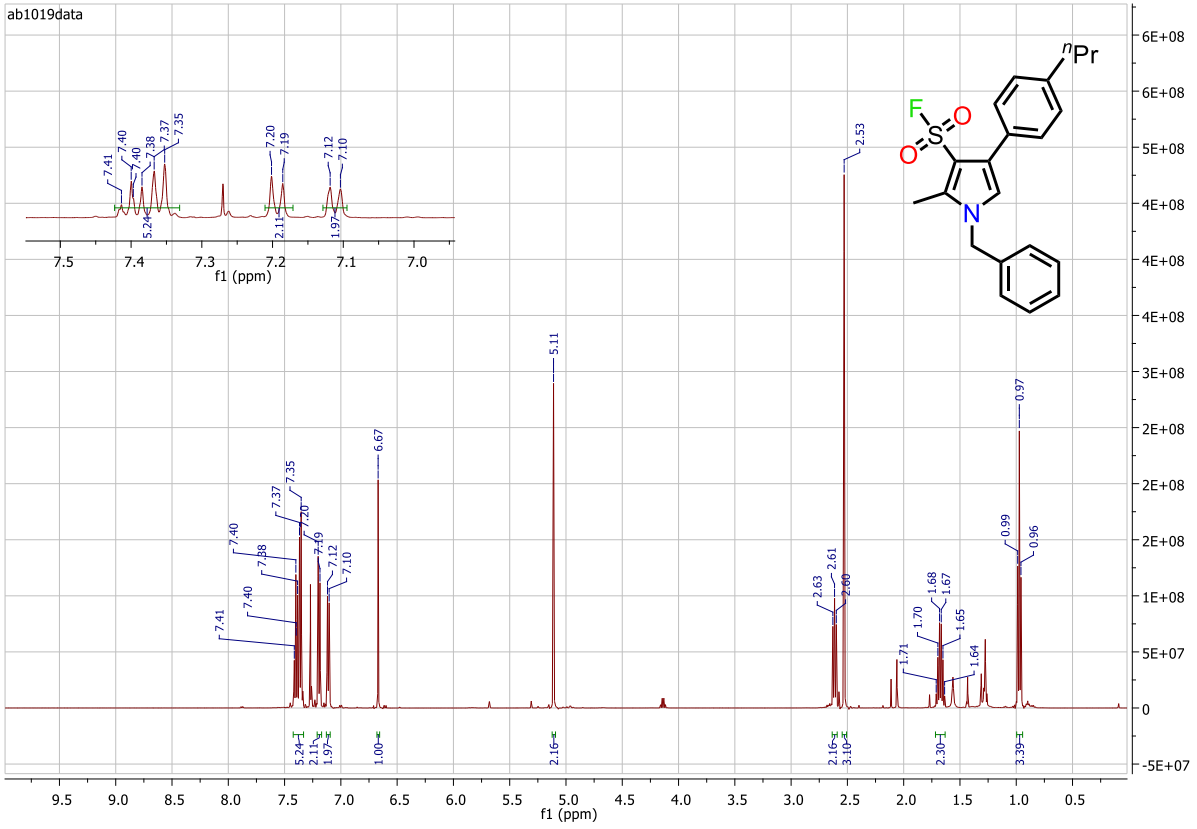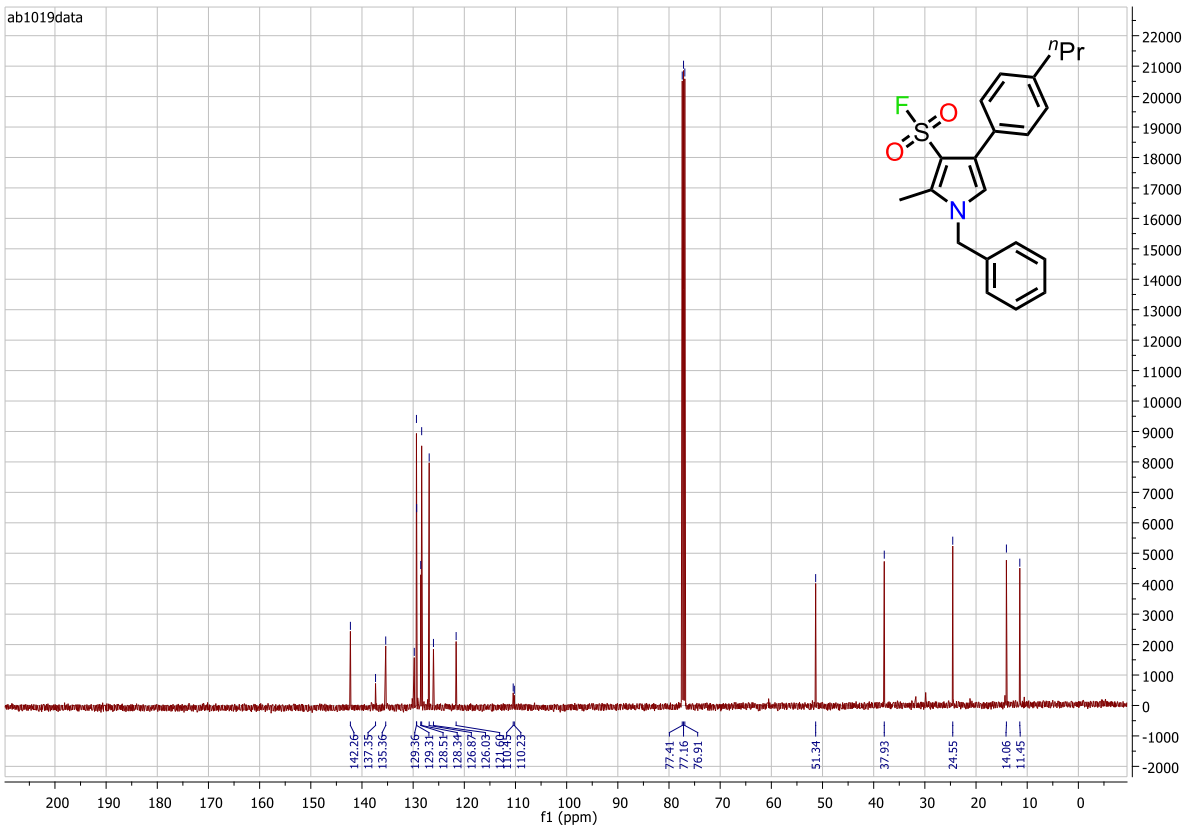

ab1019data

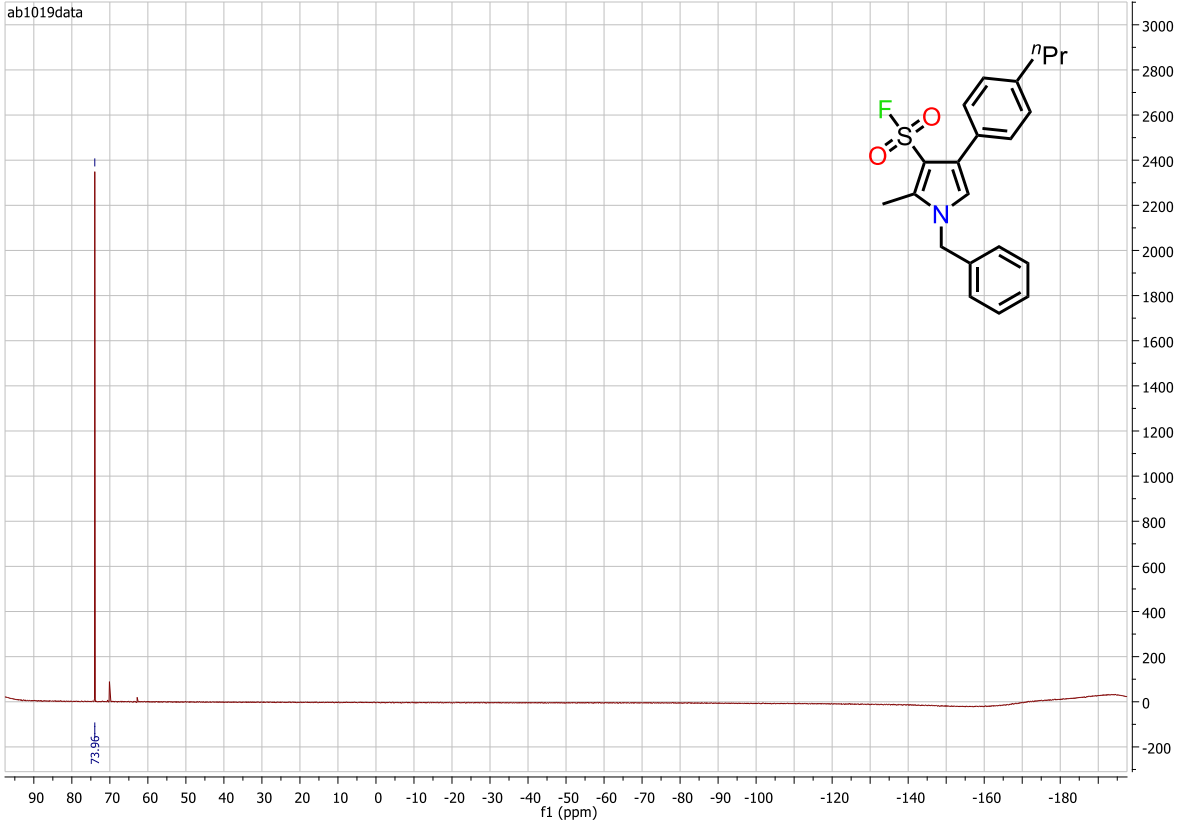

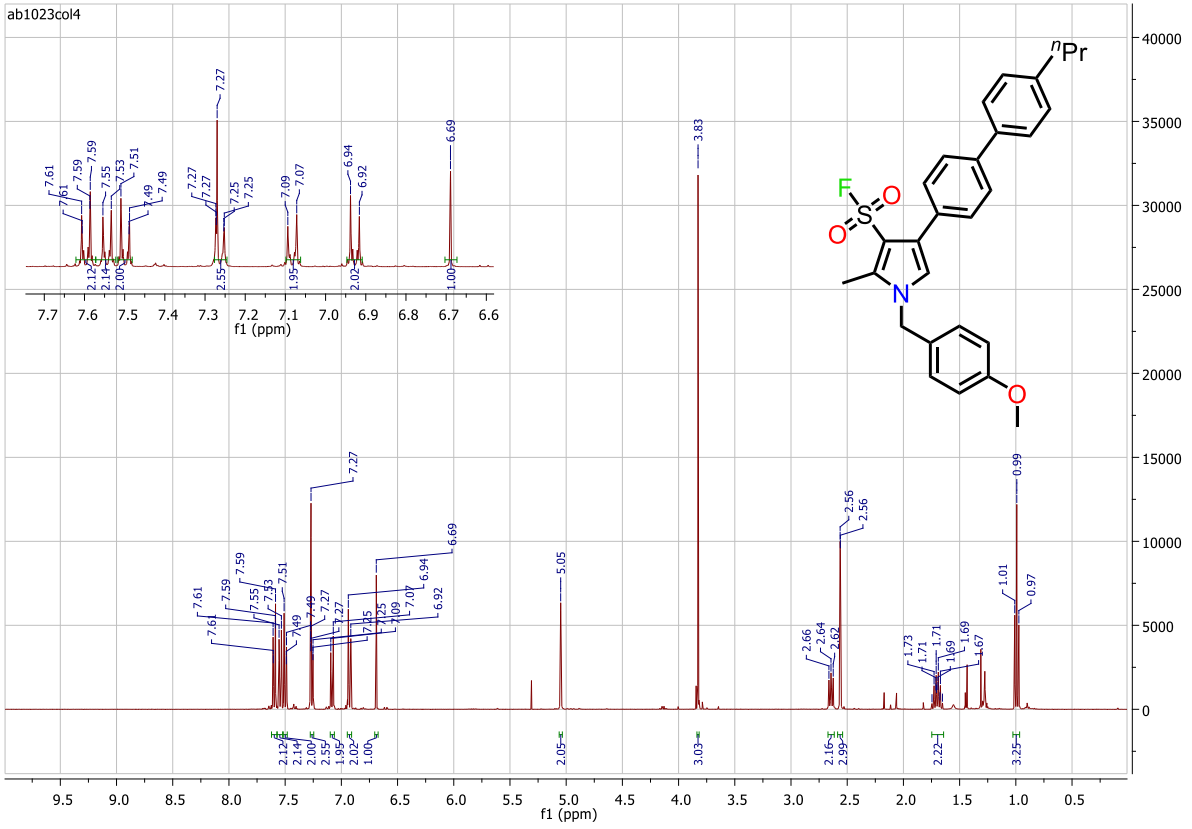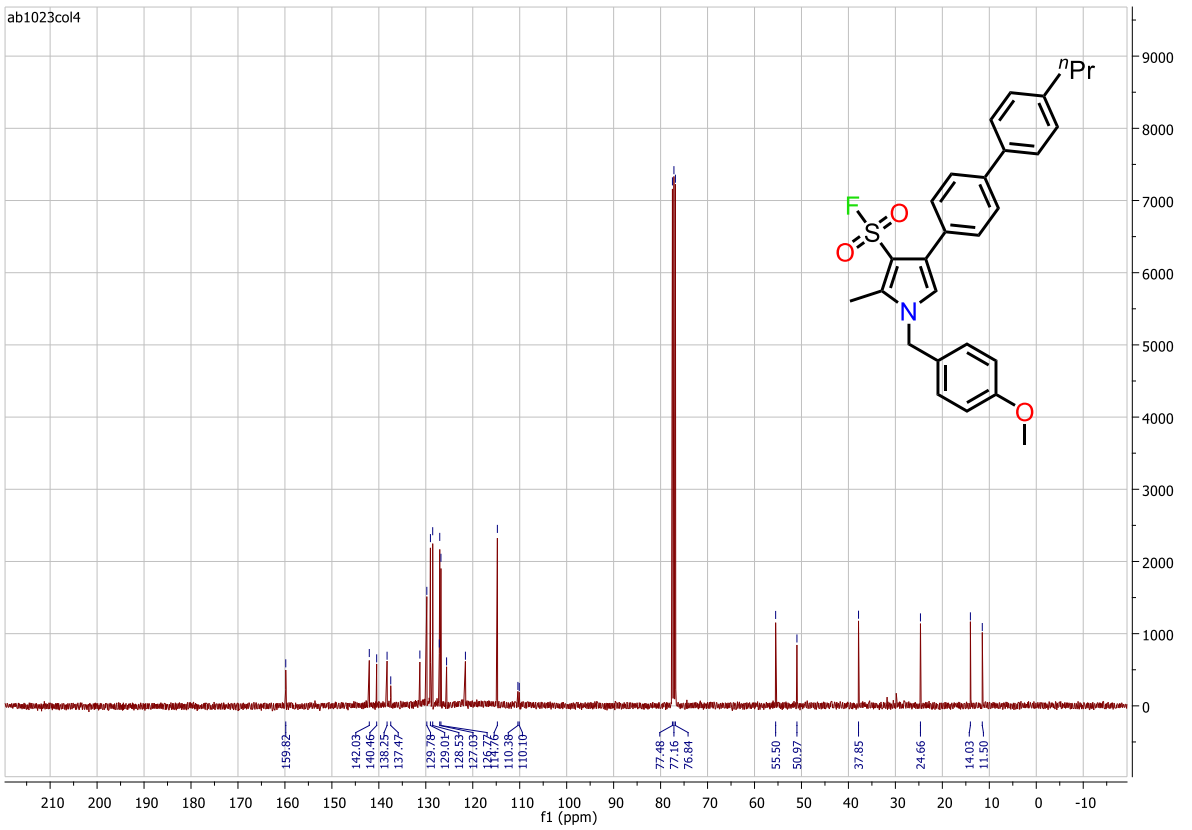

ab1023data

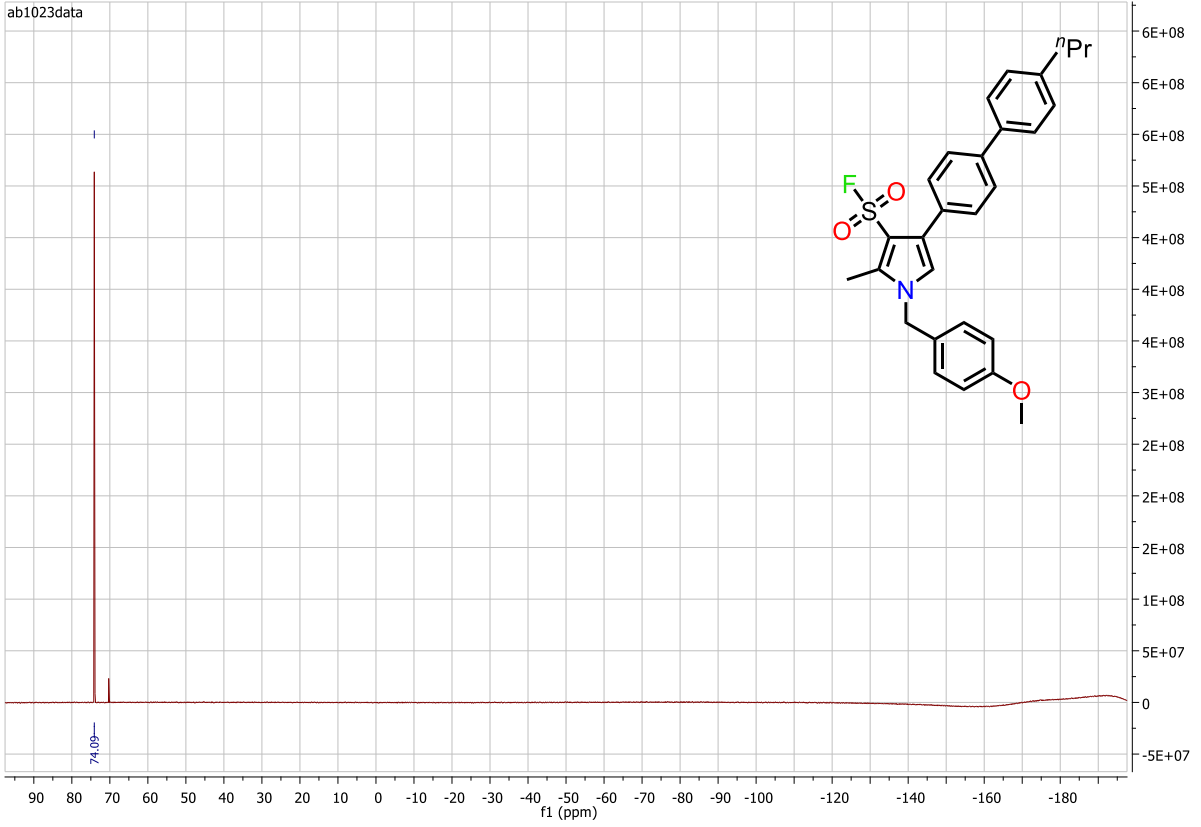

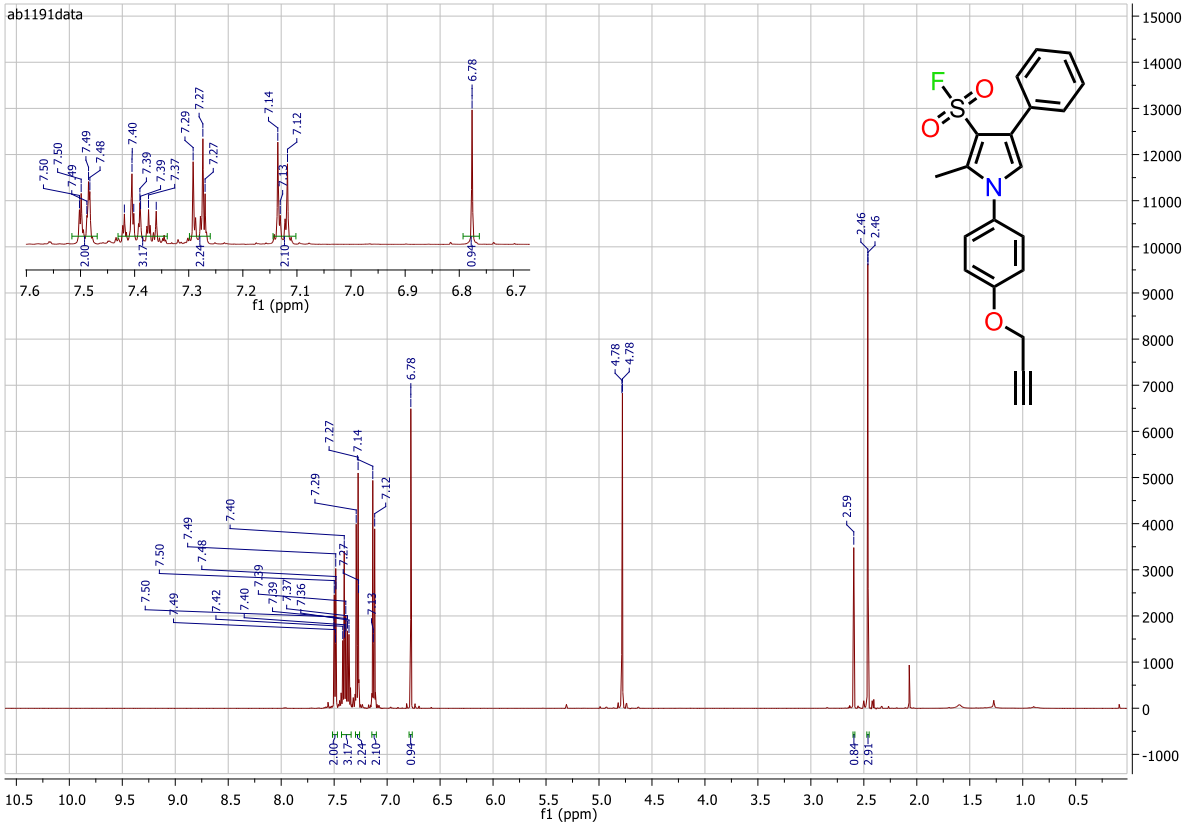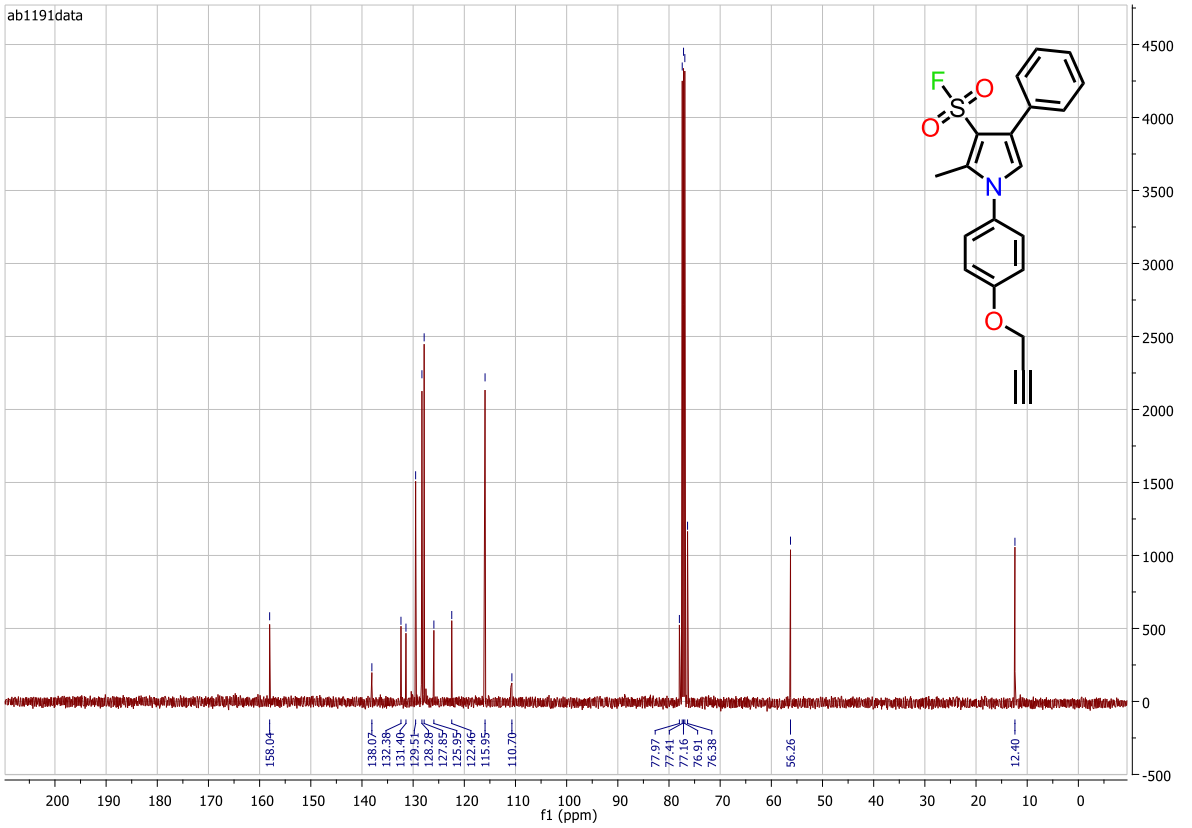

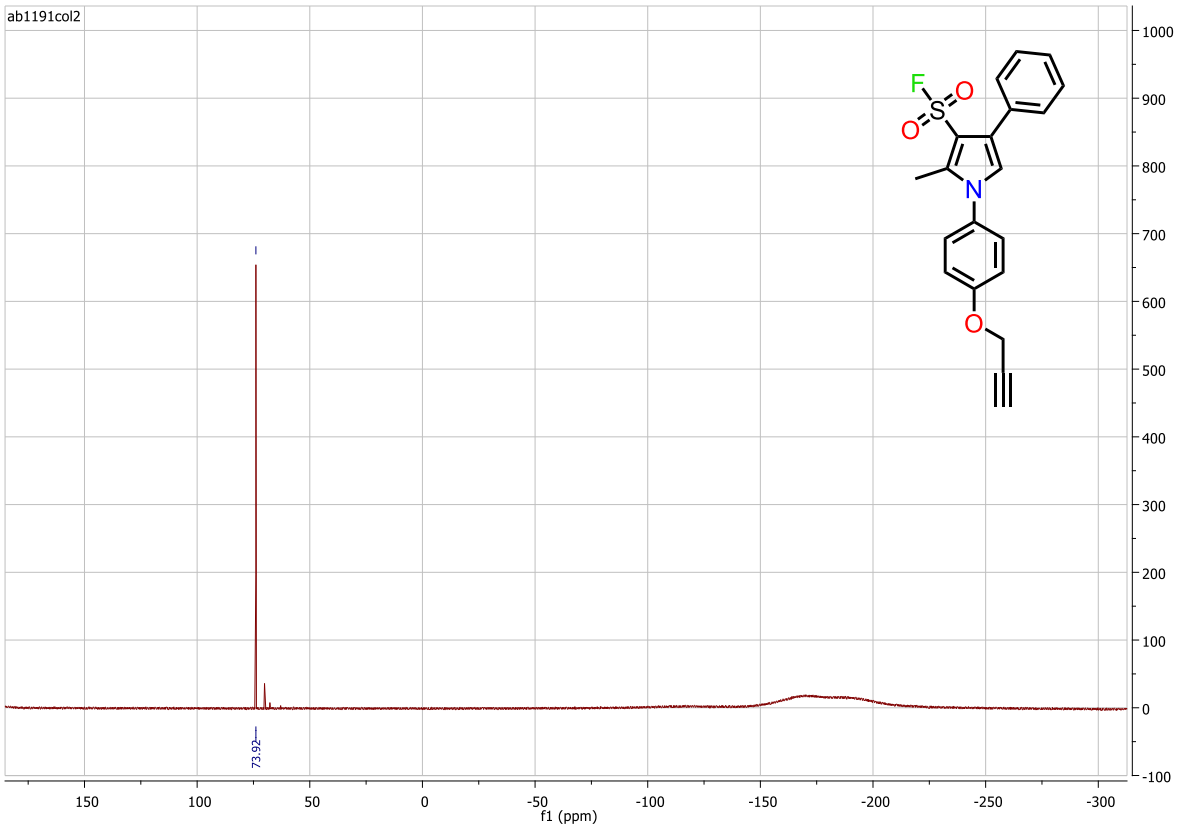



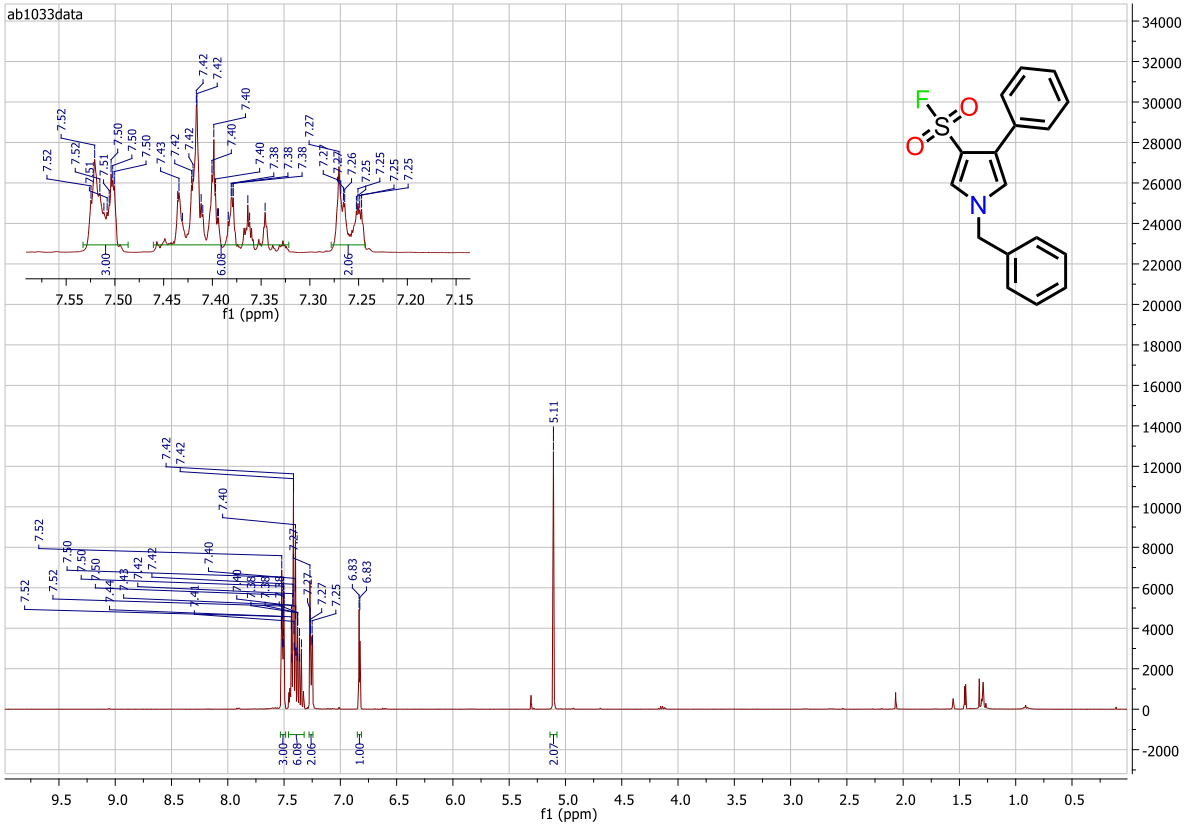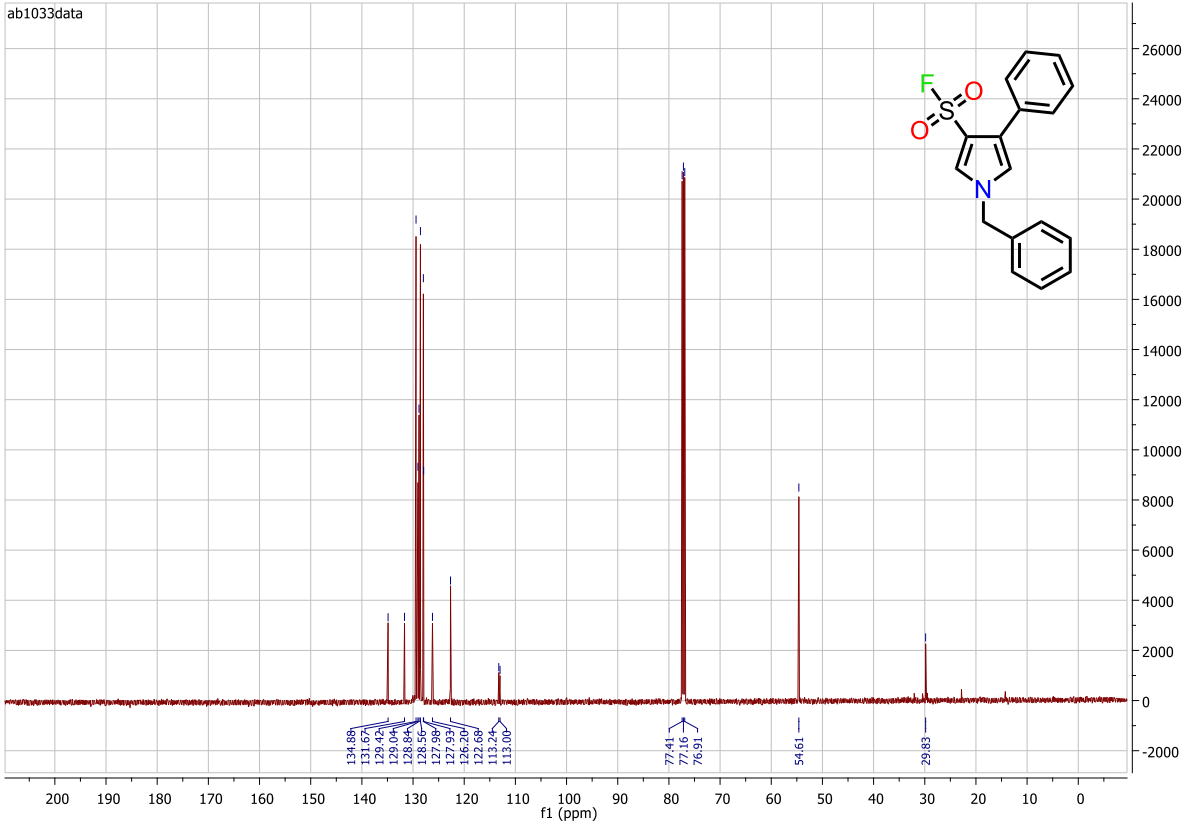

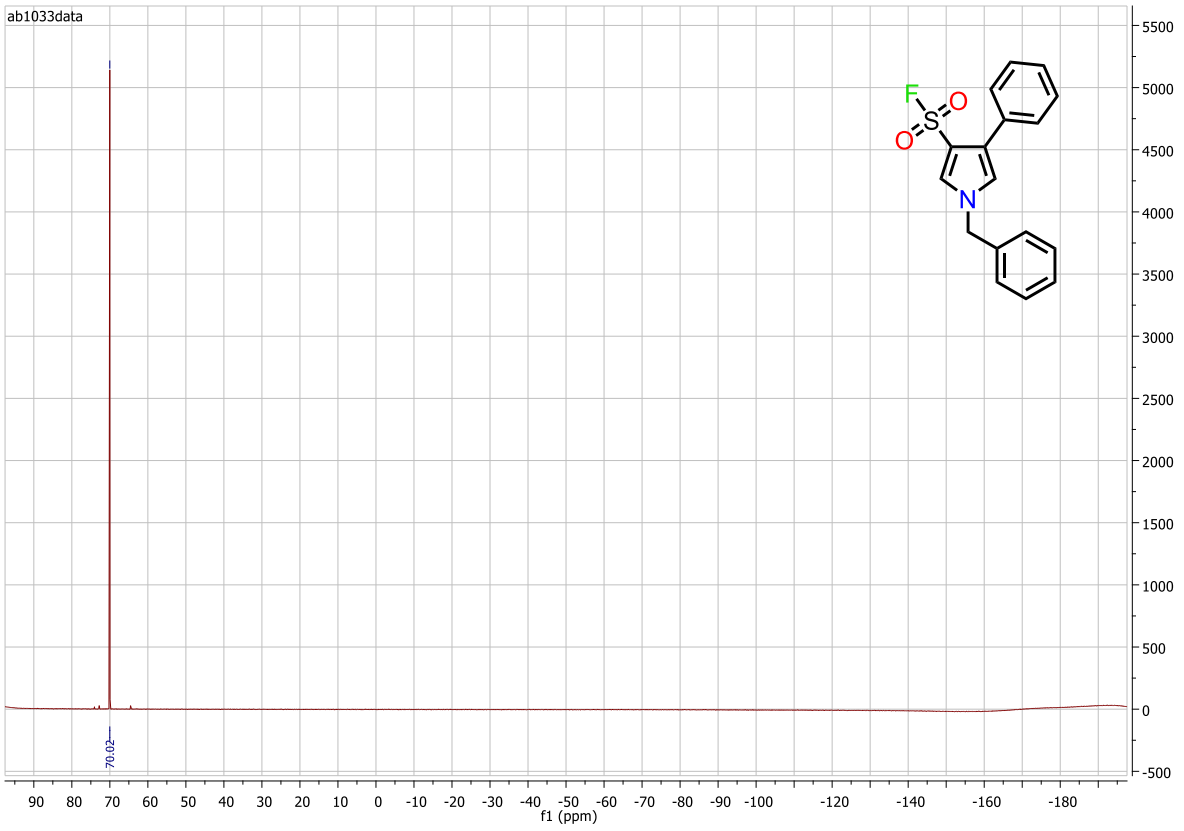

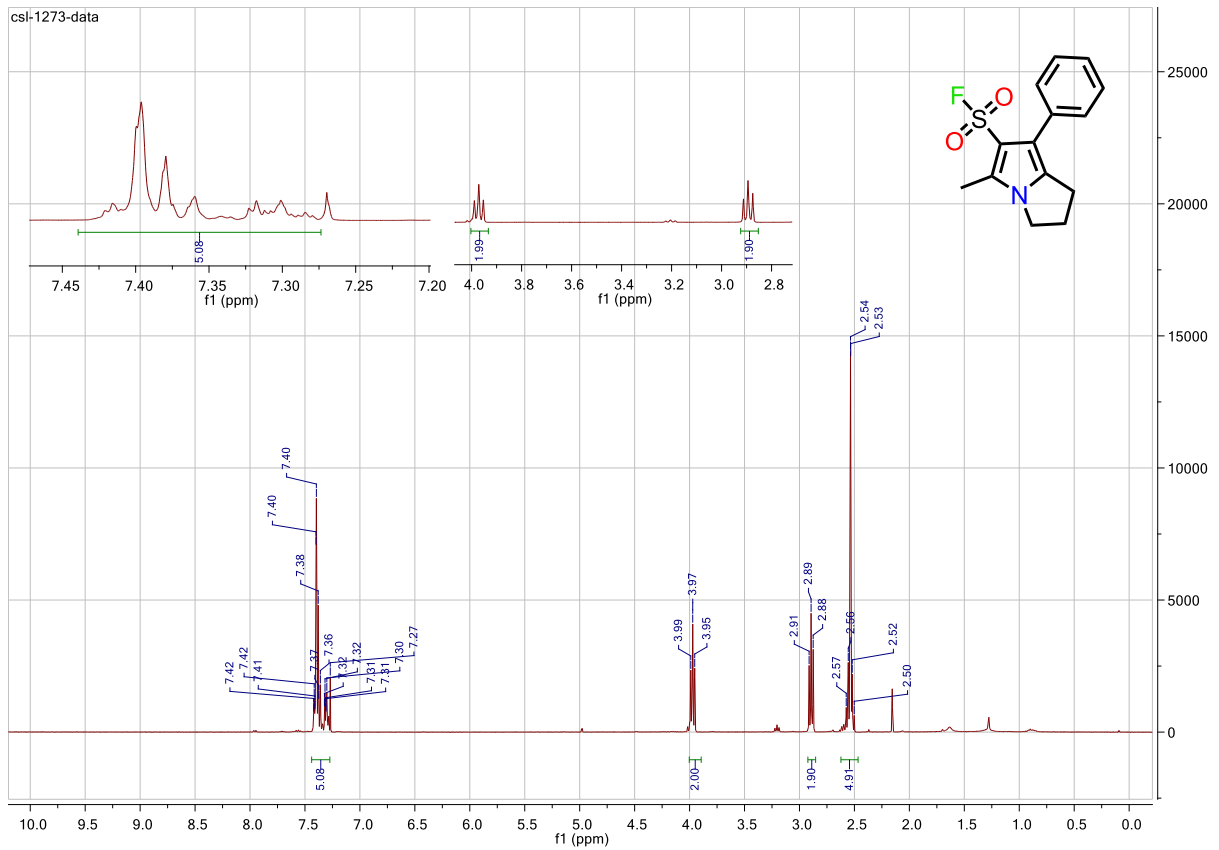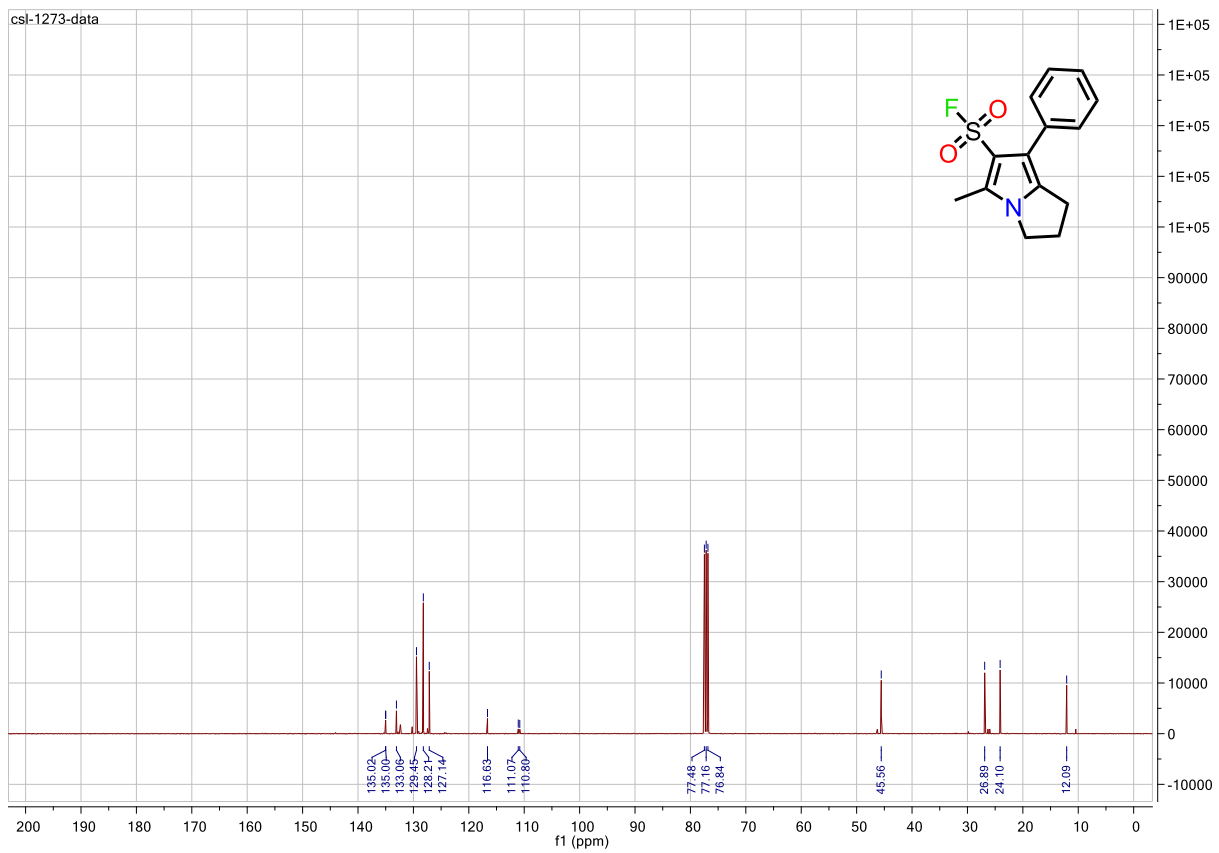

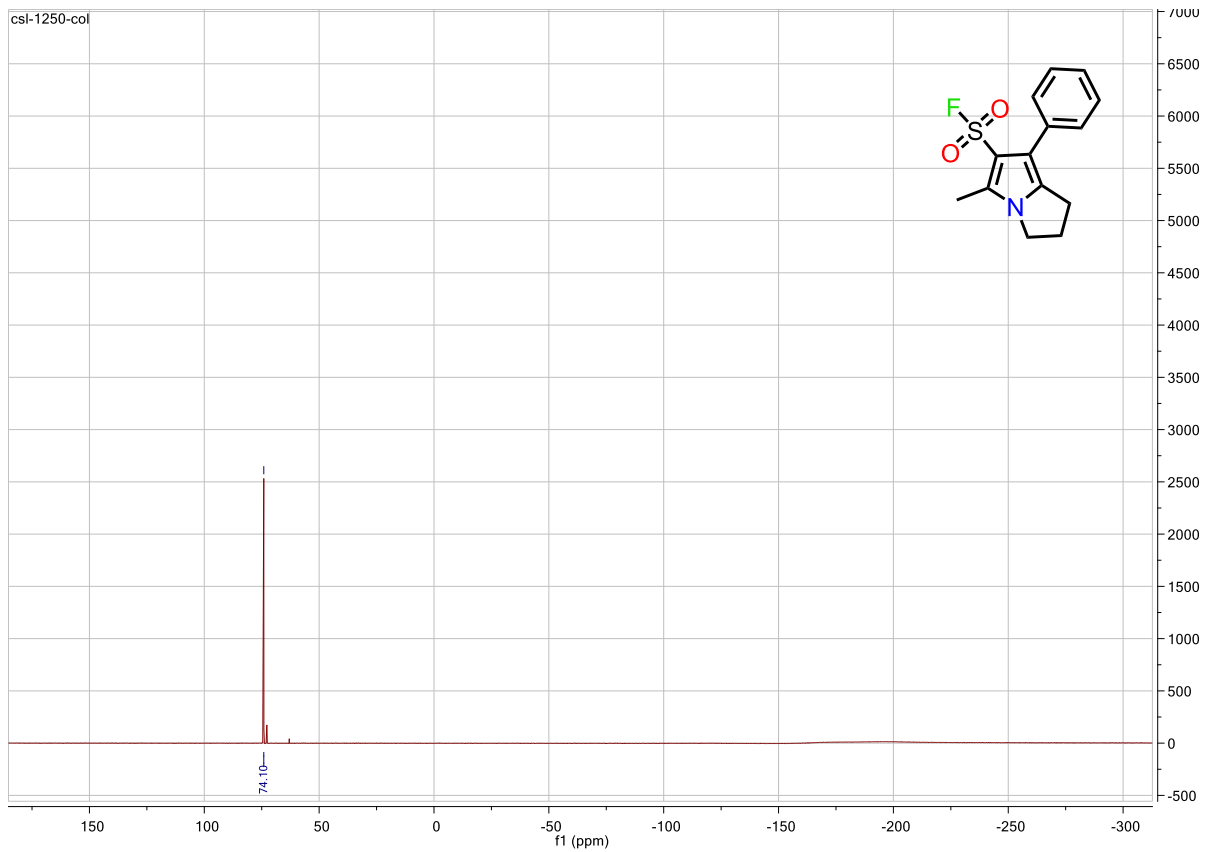

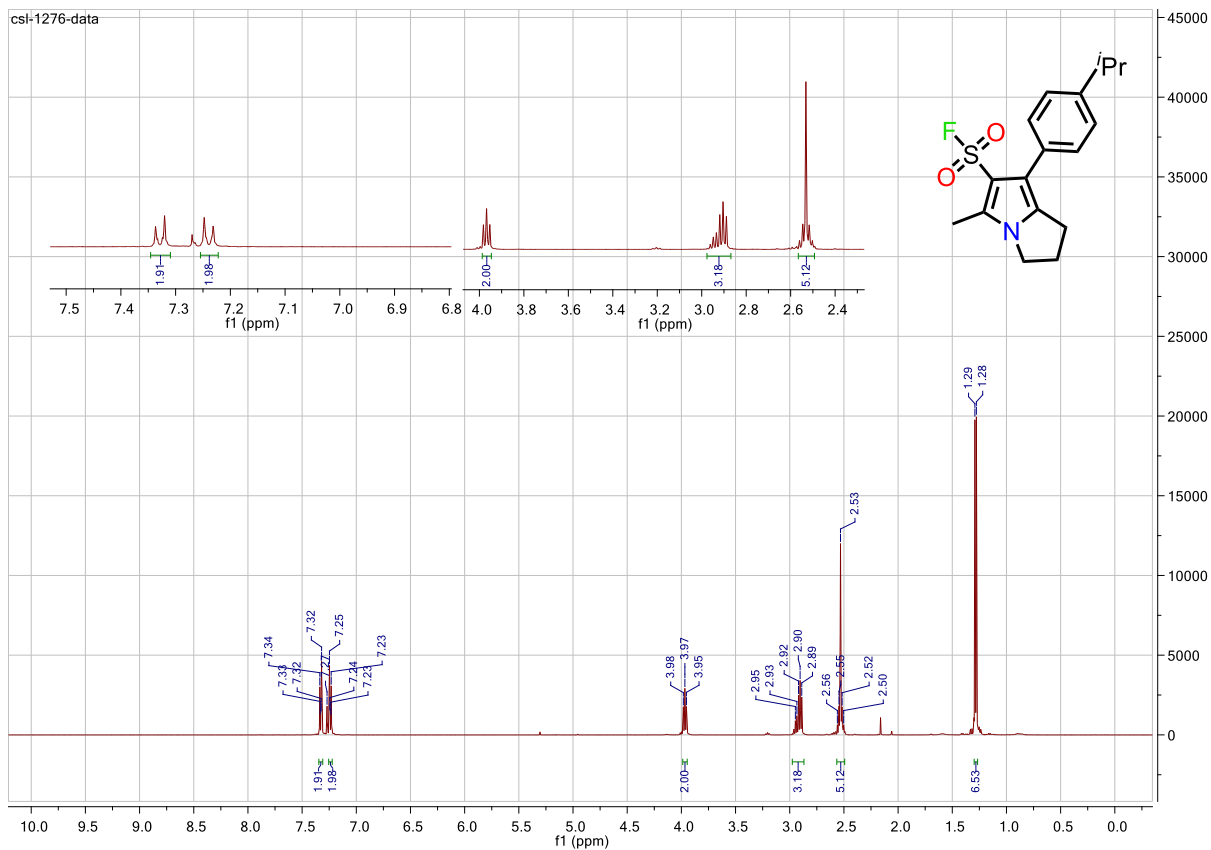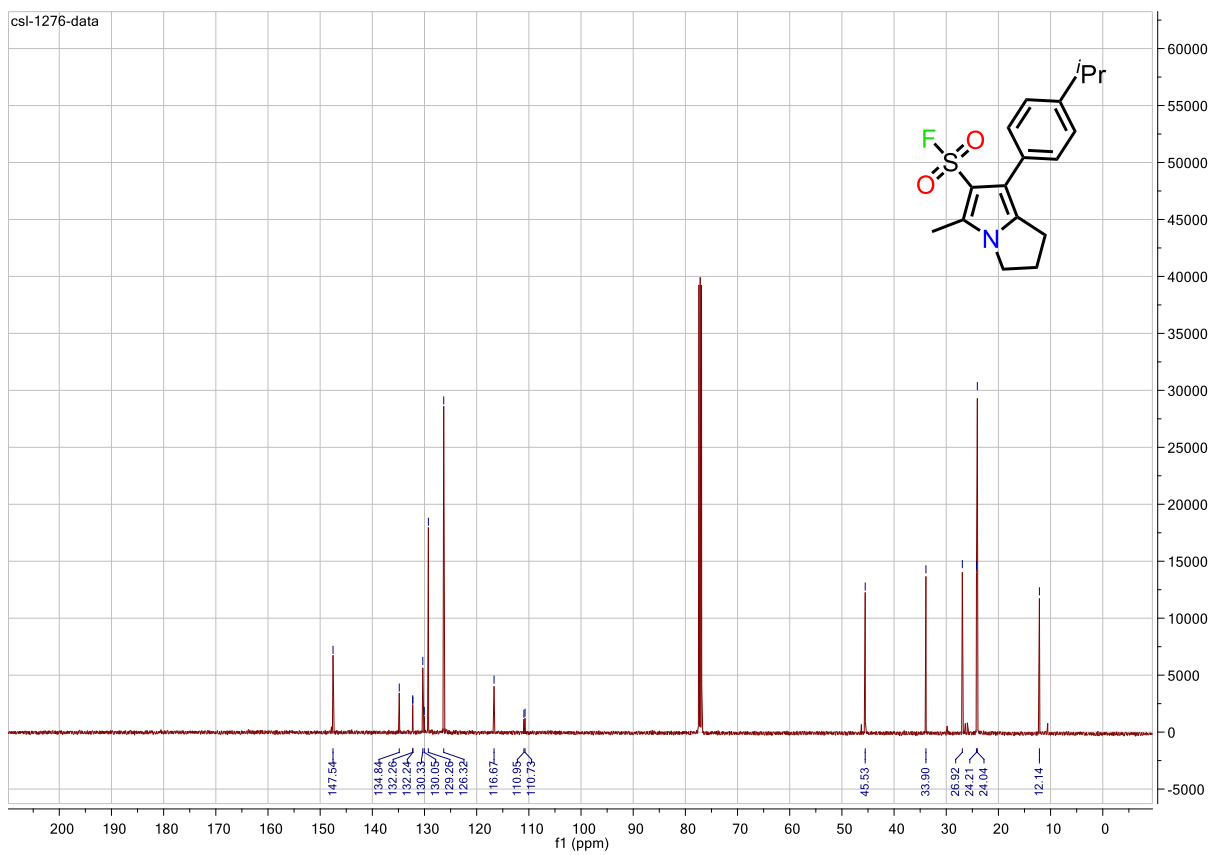

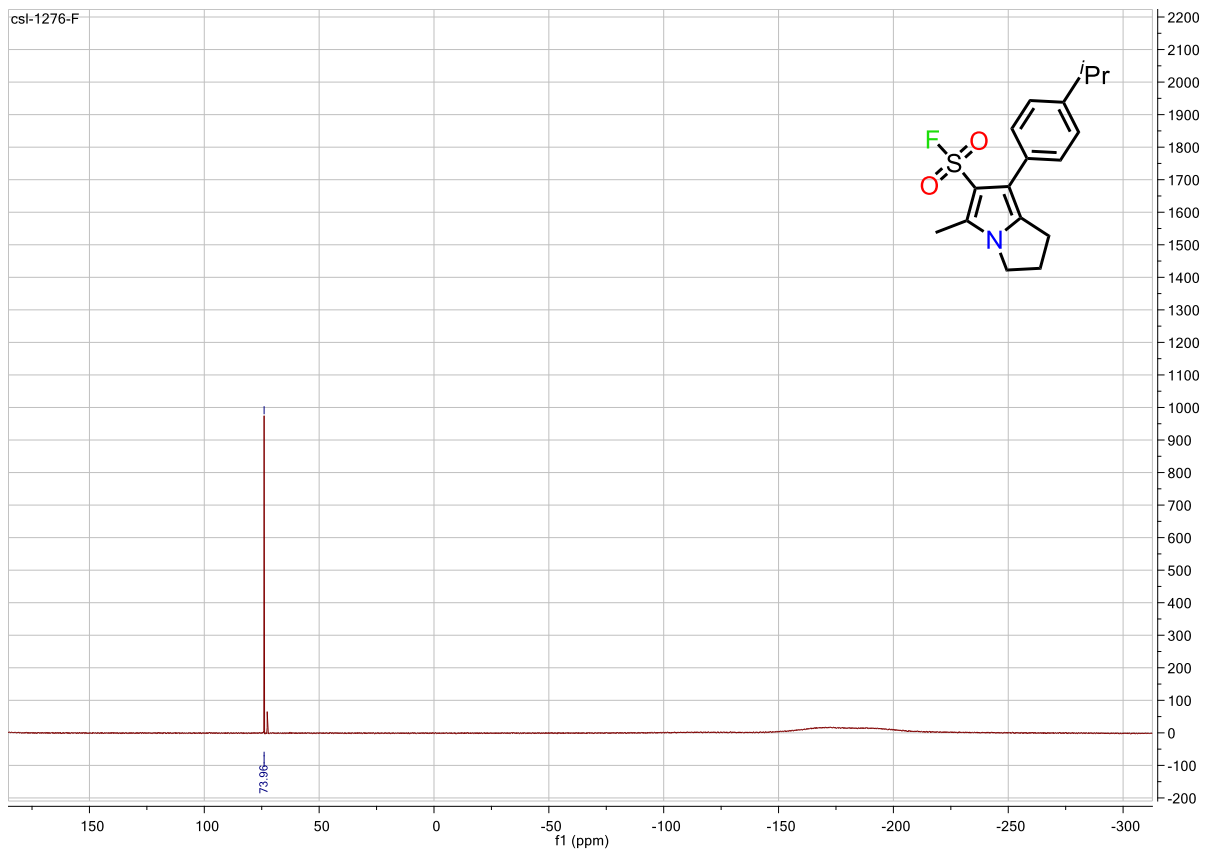

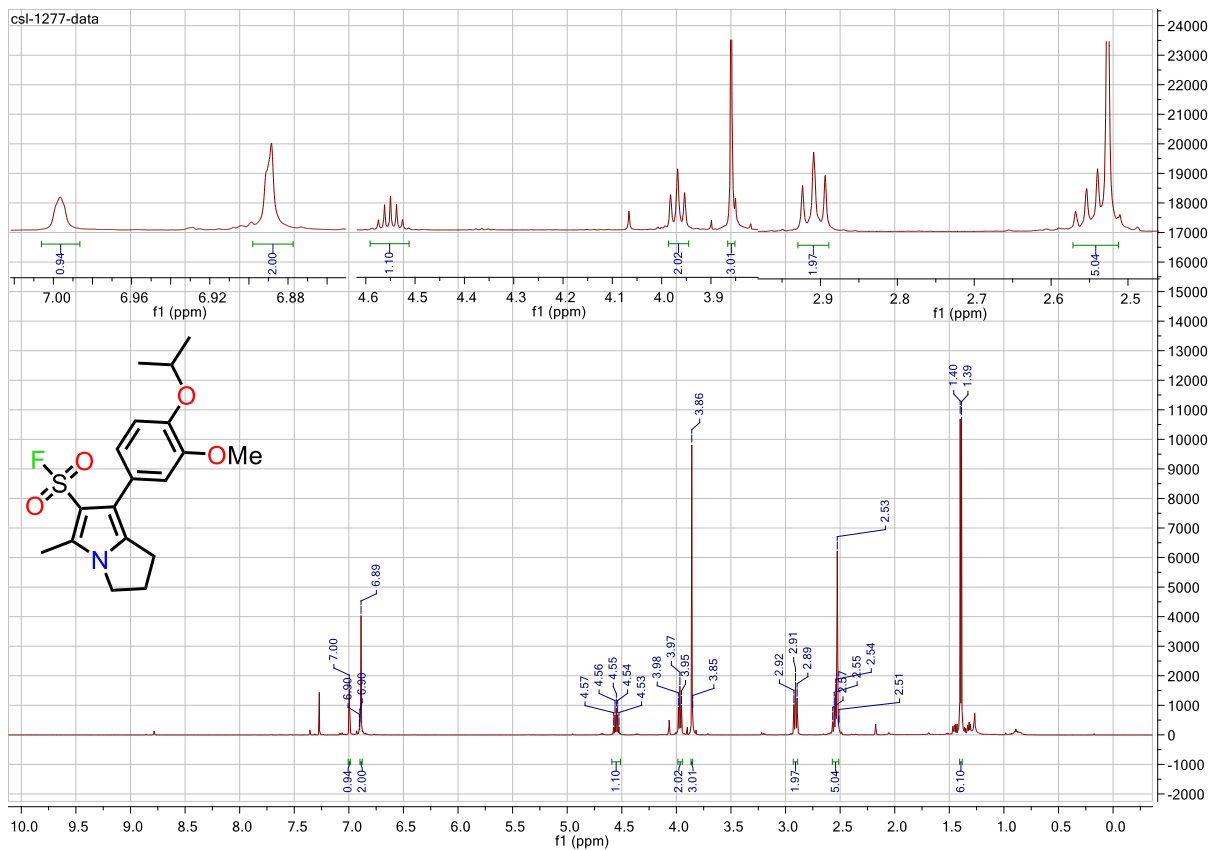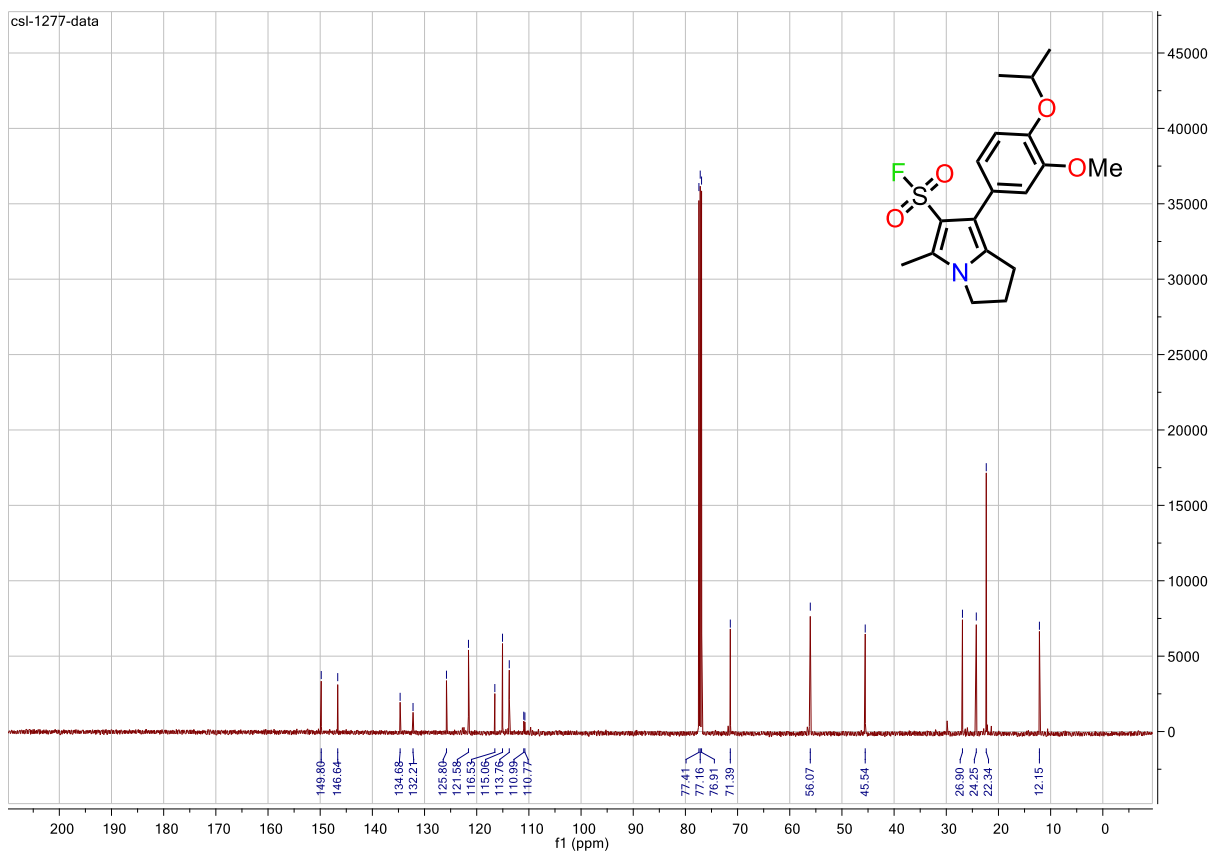

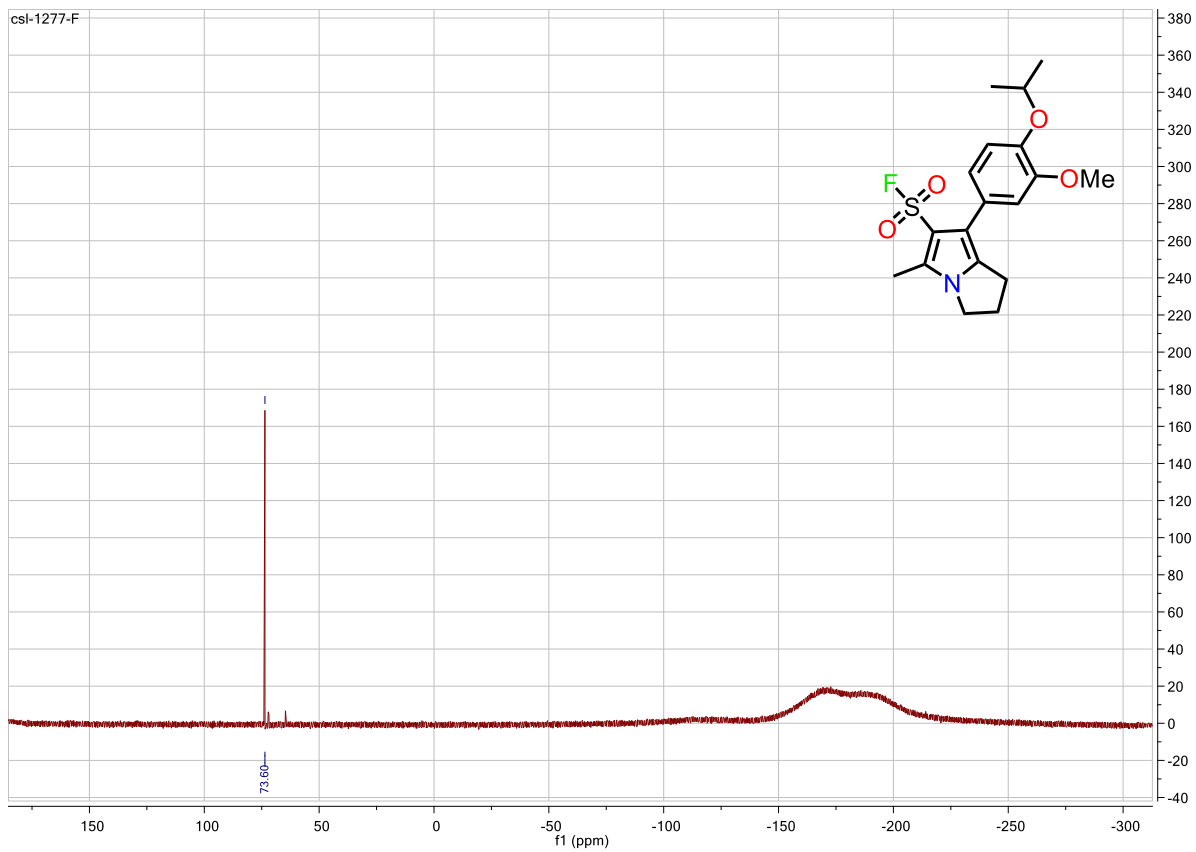



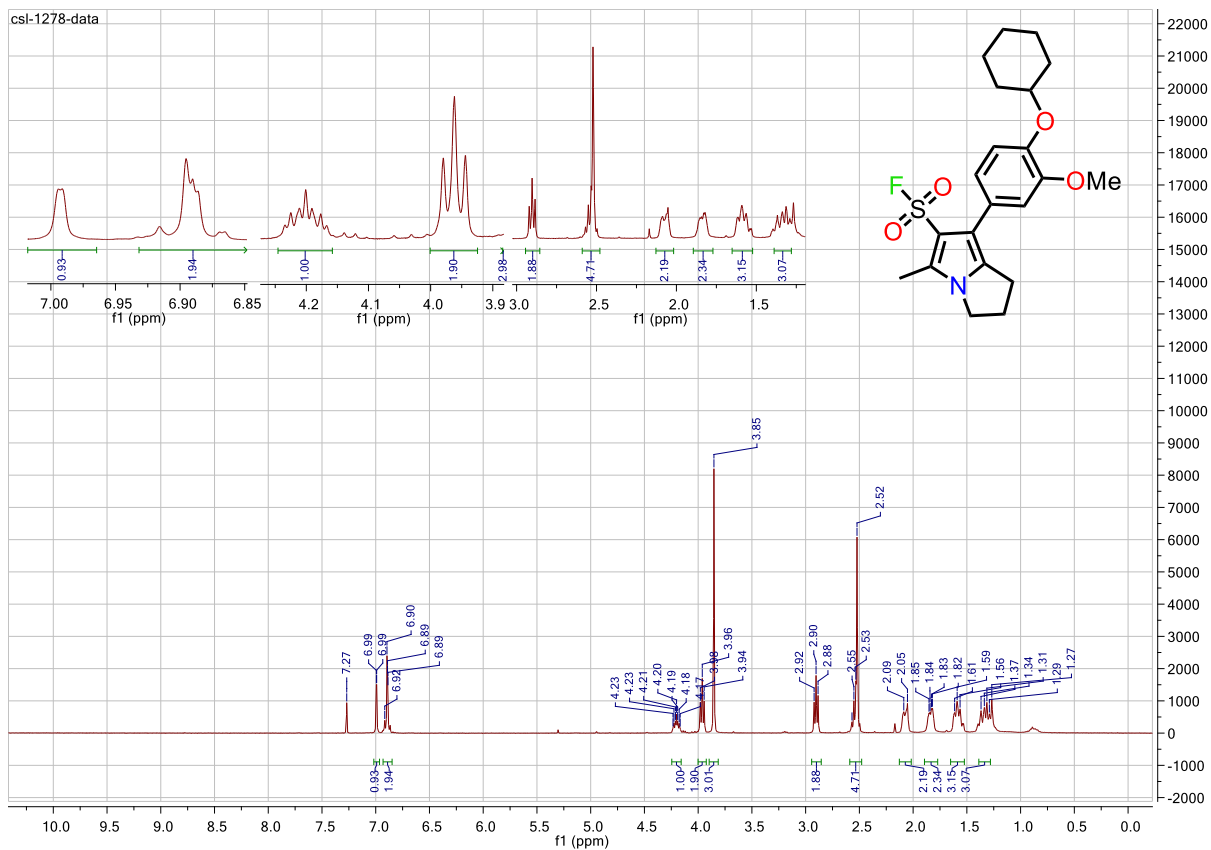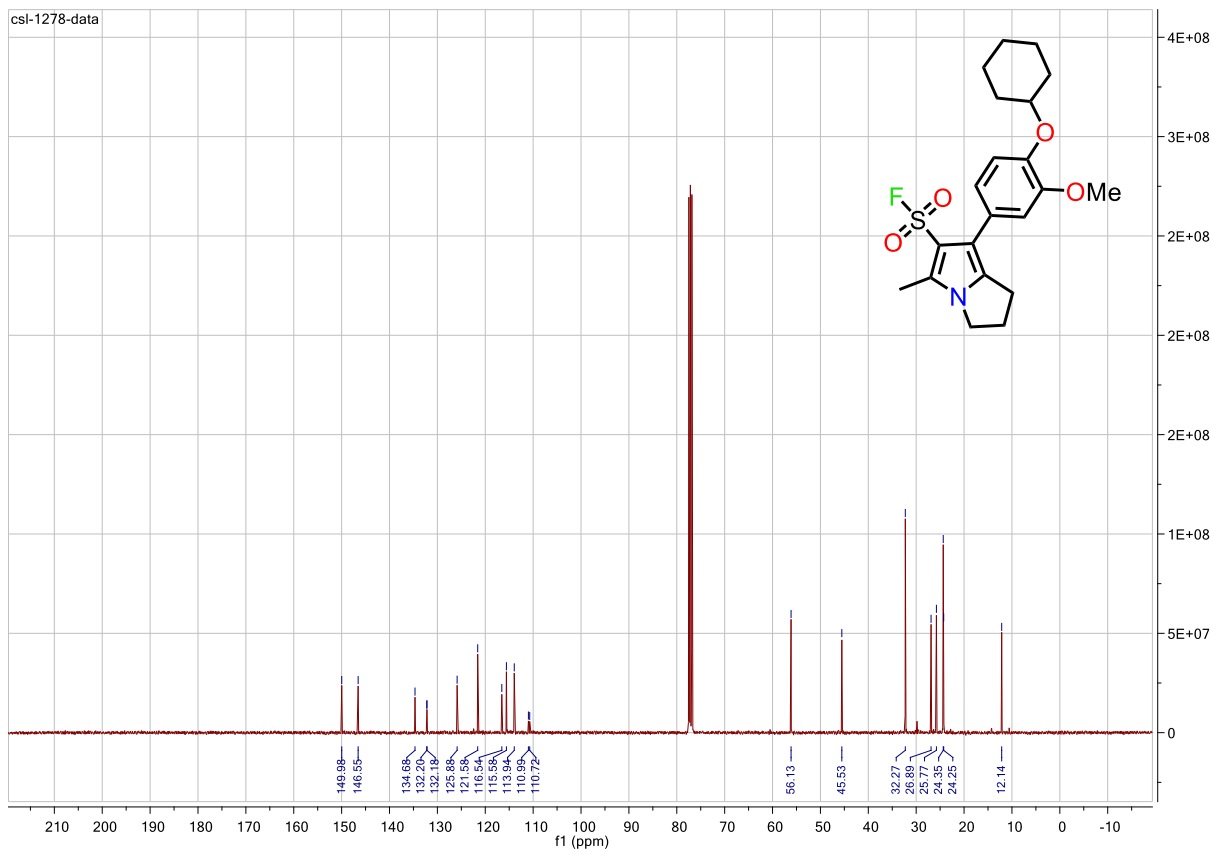

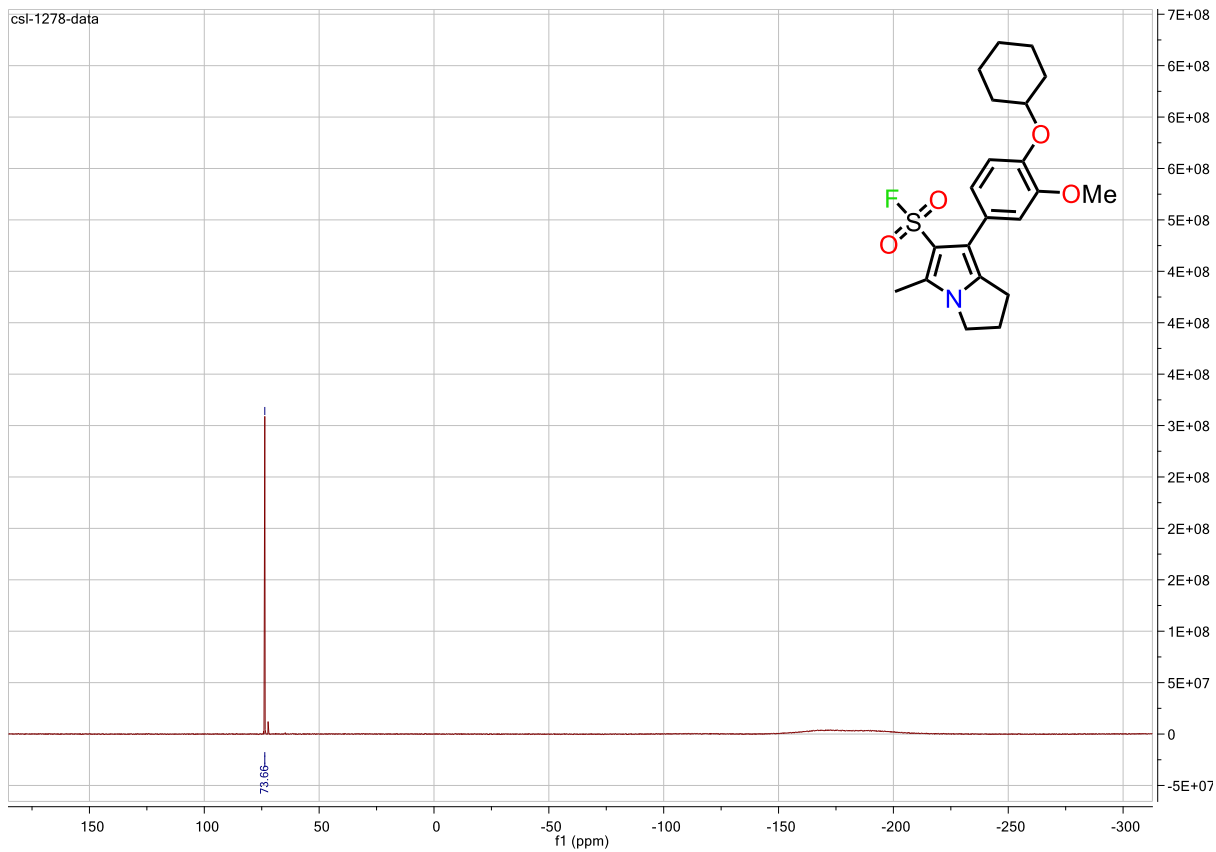

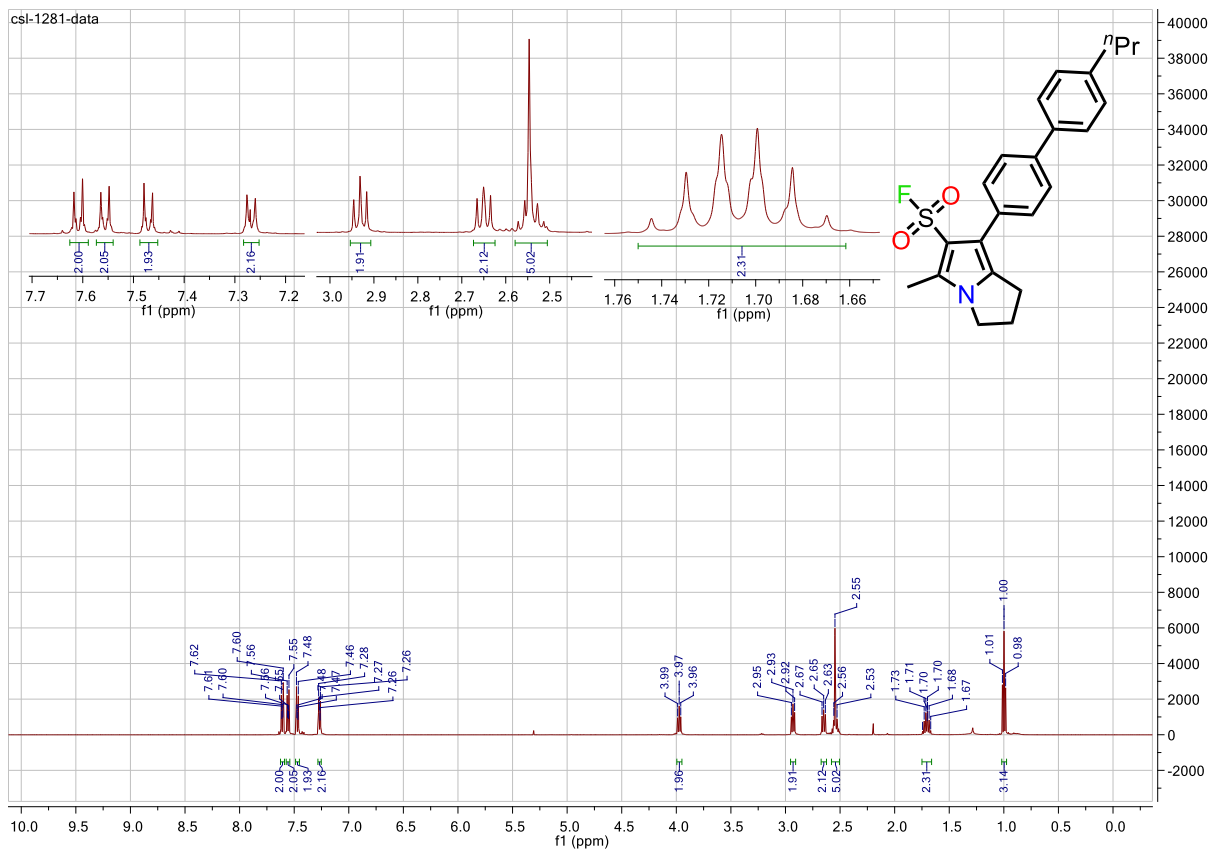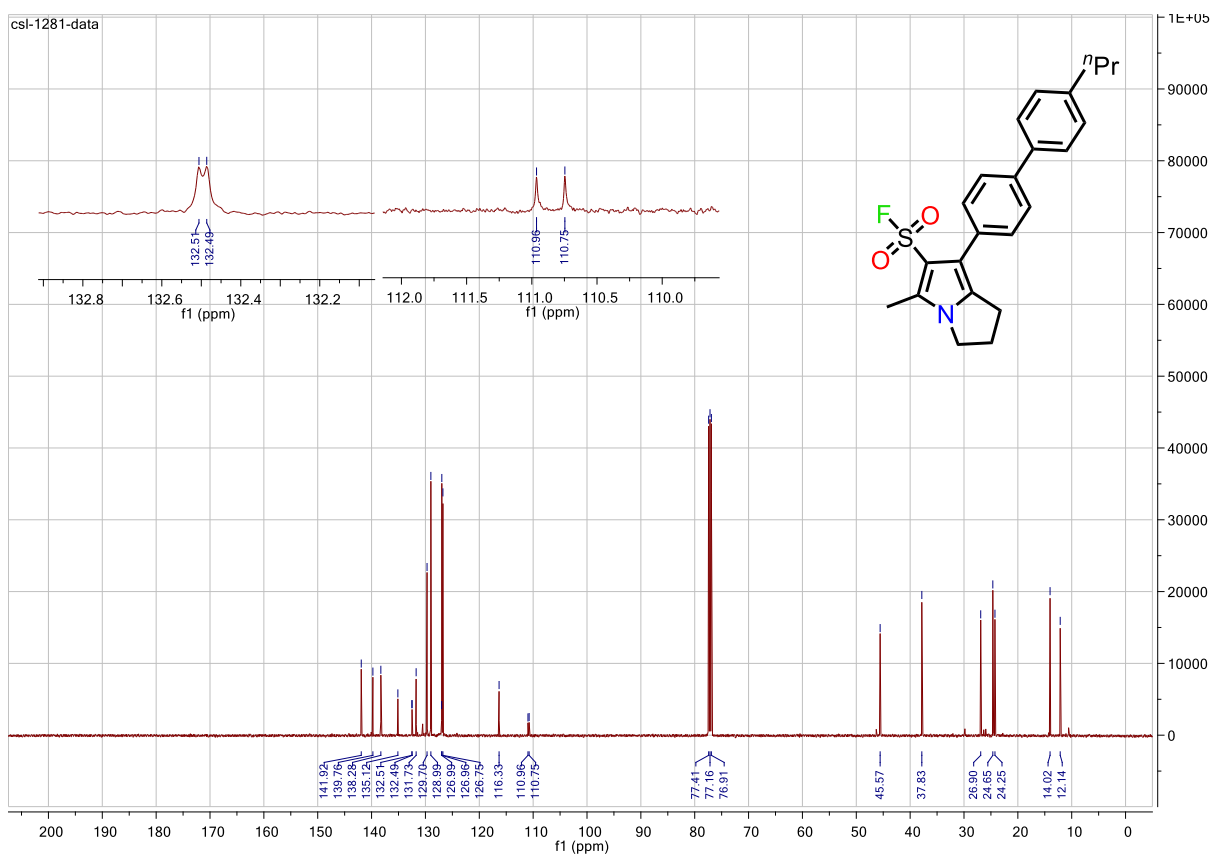

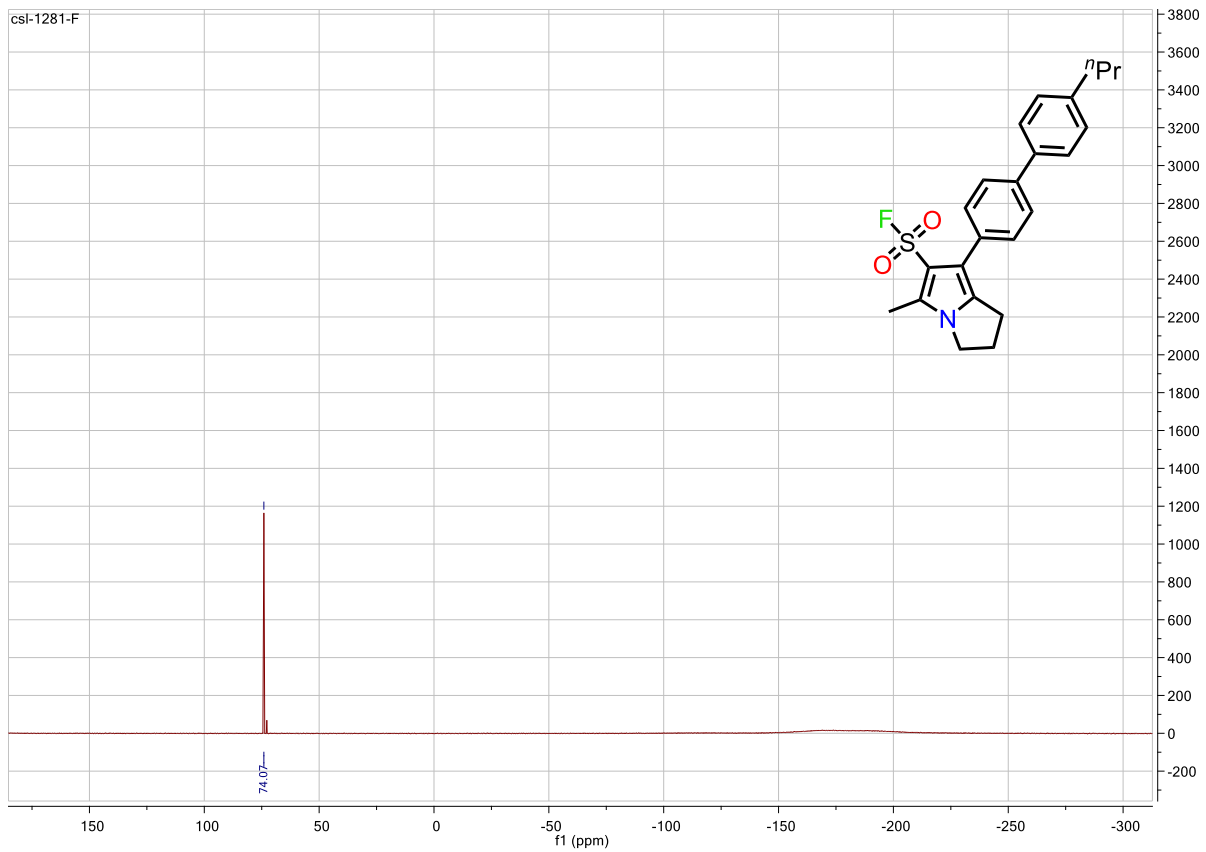

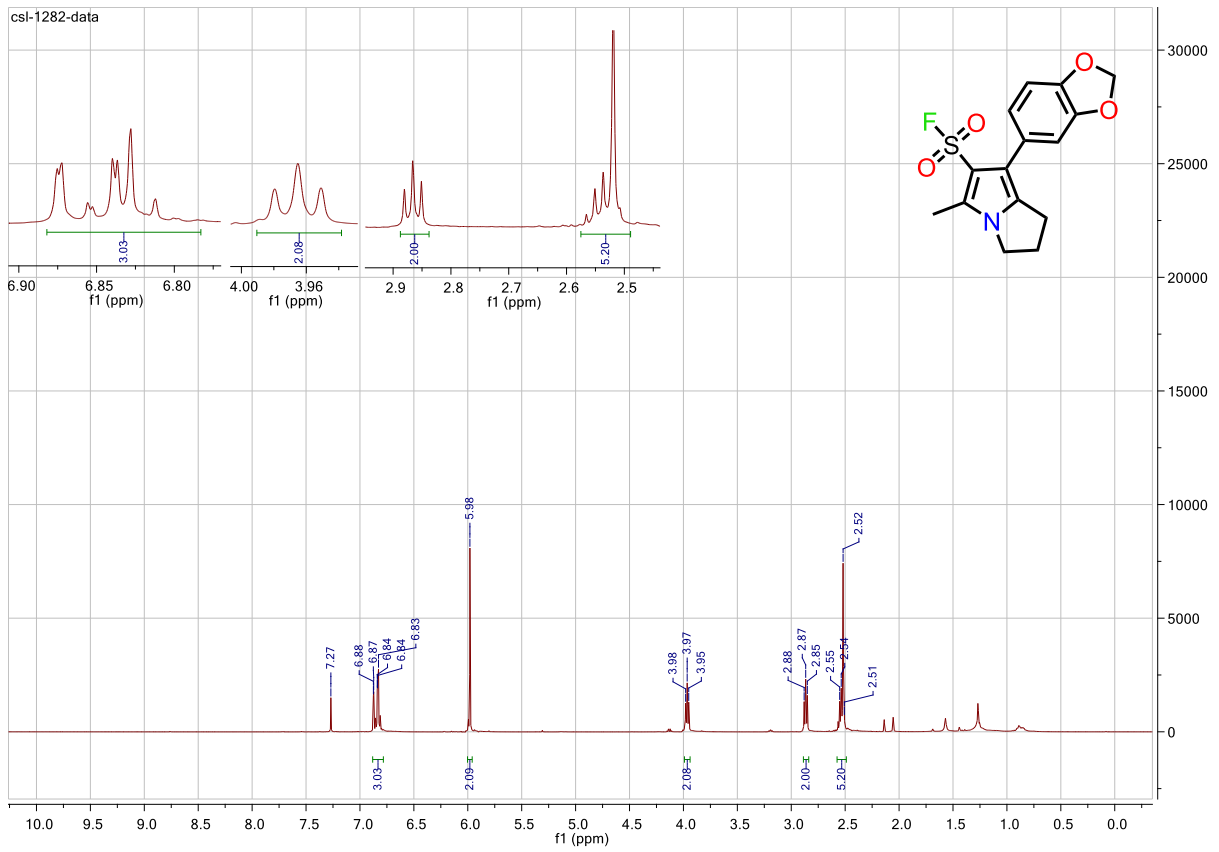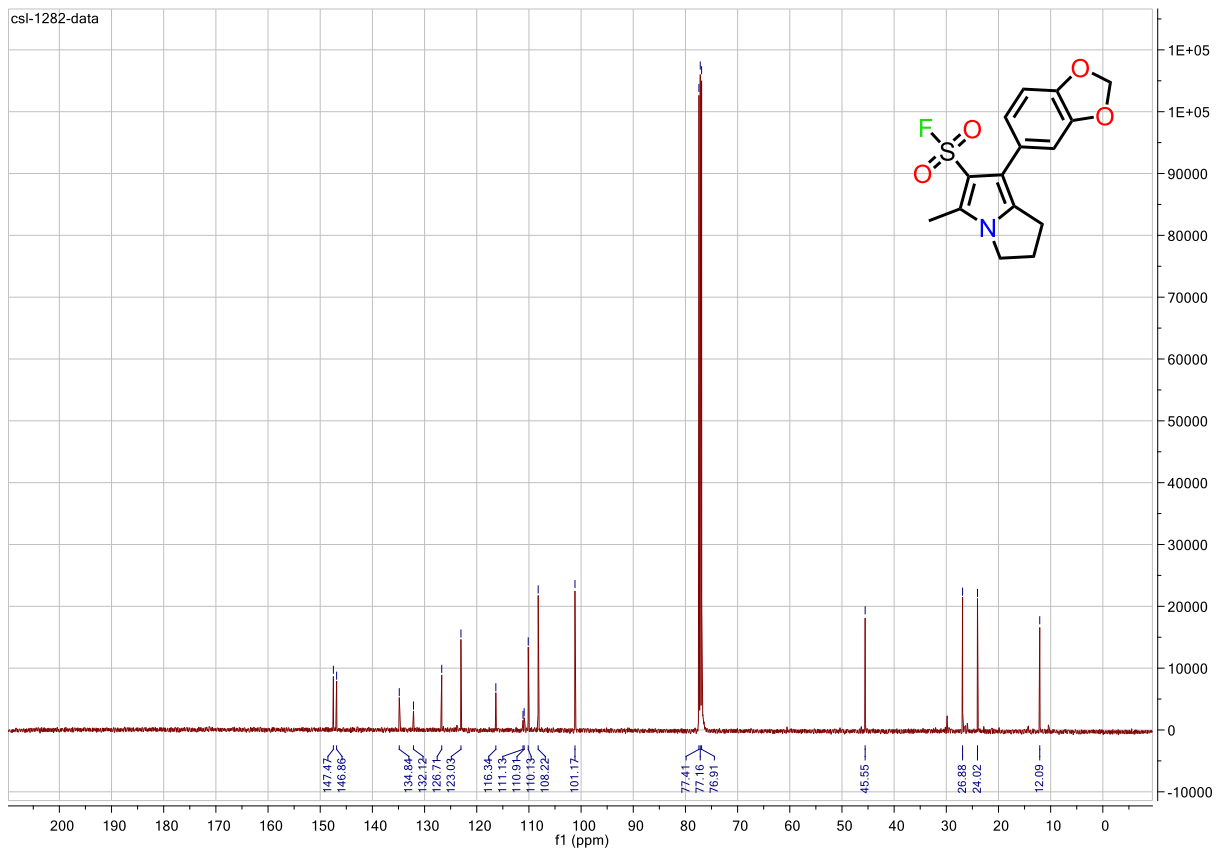

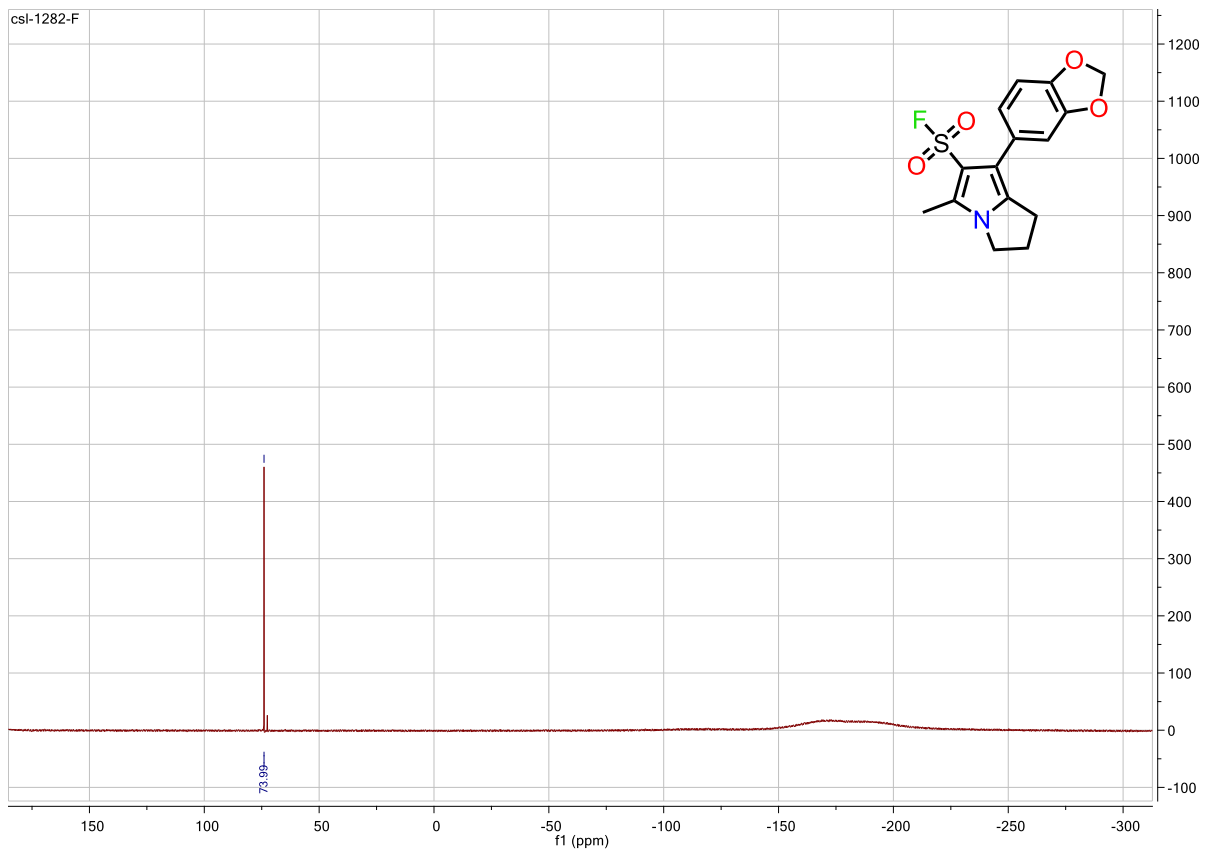

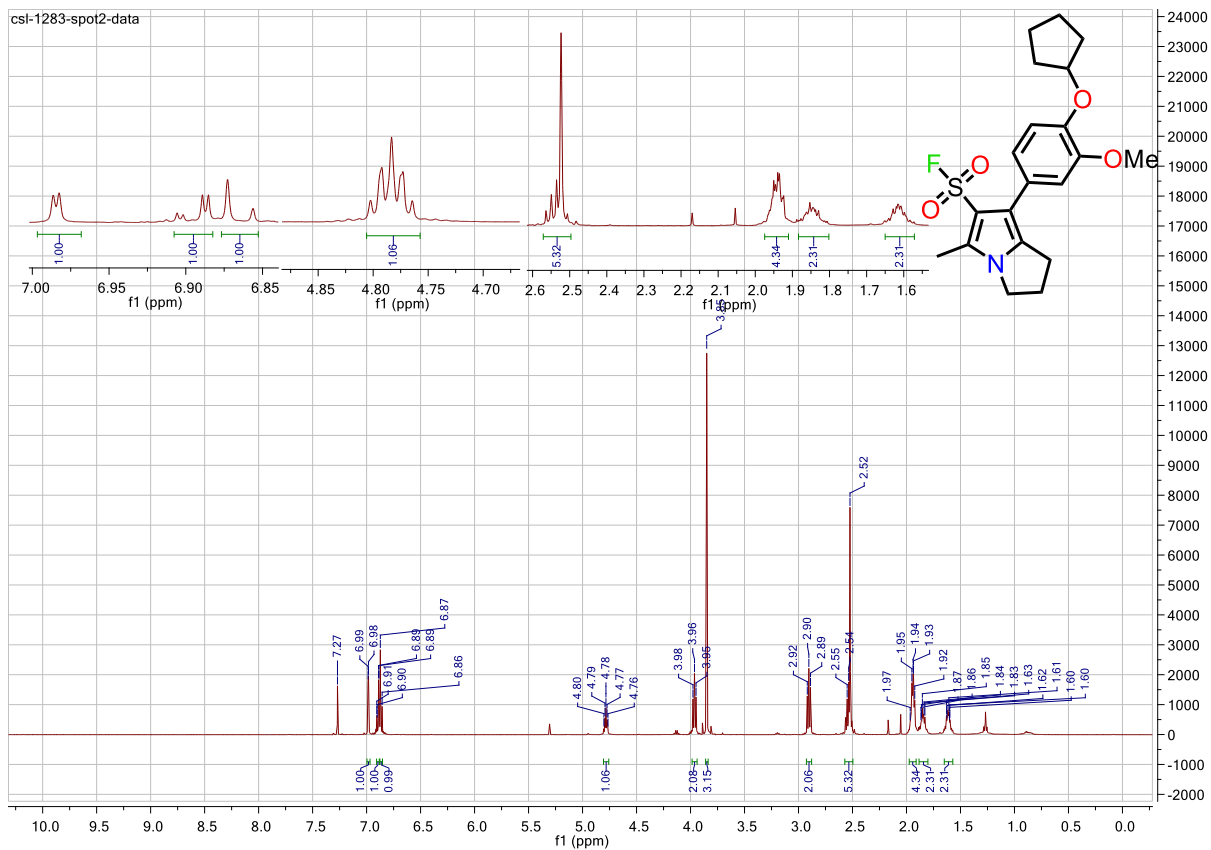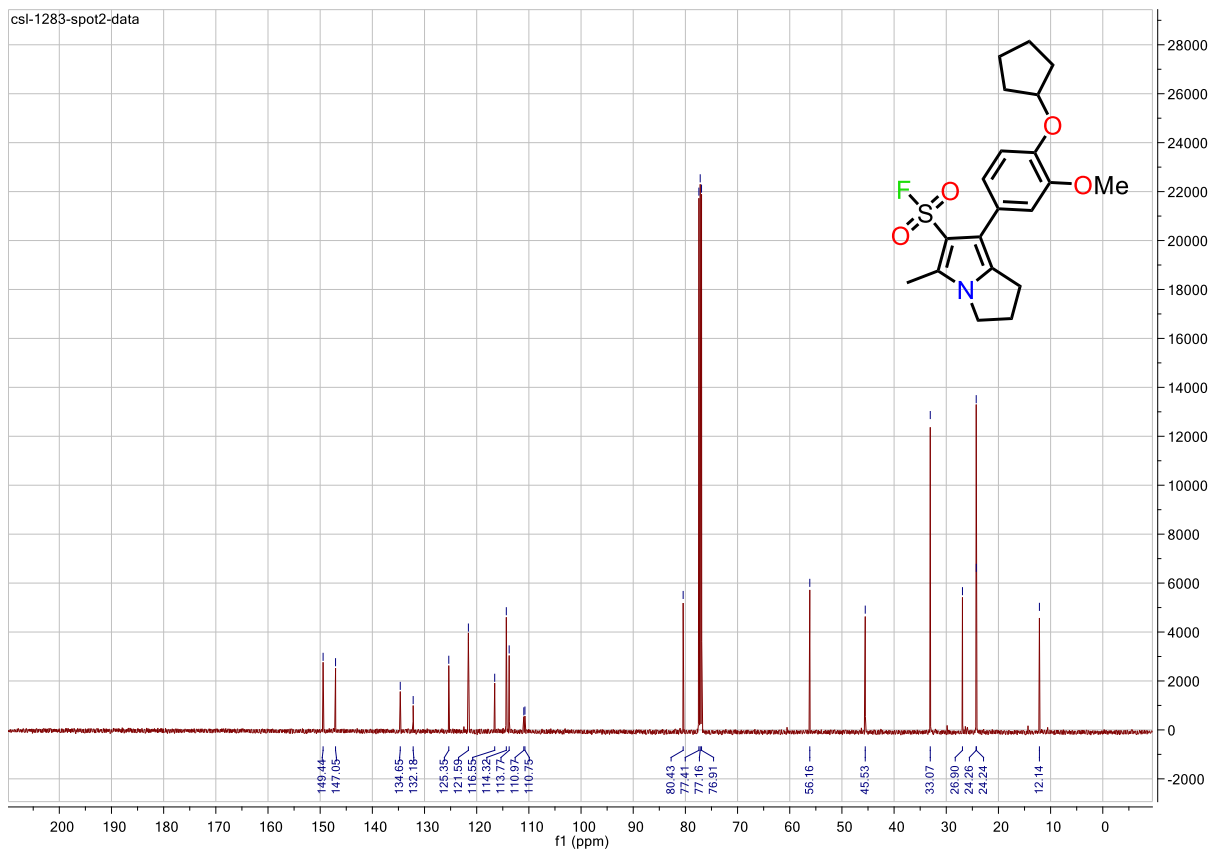

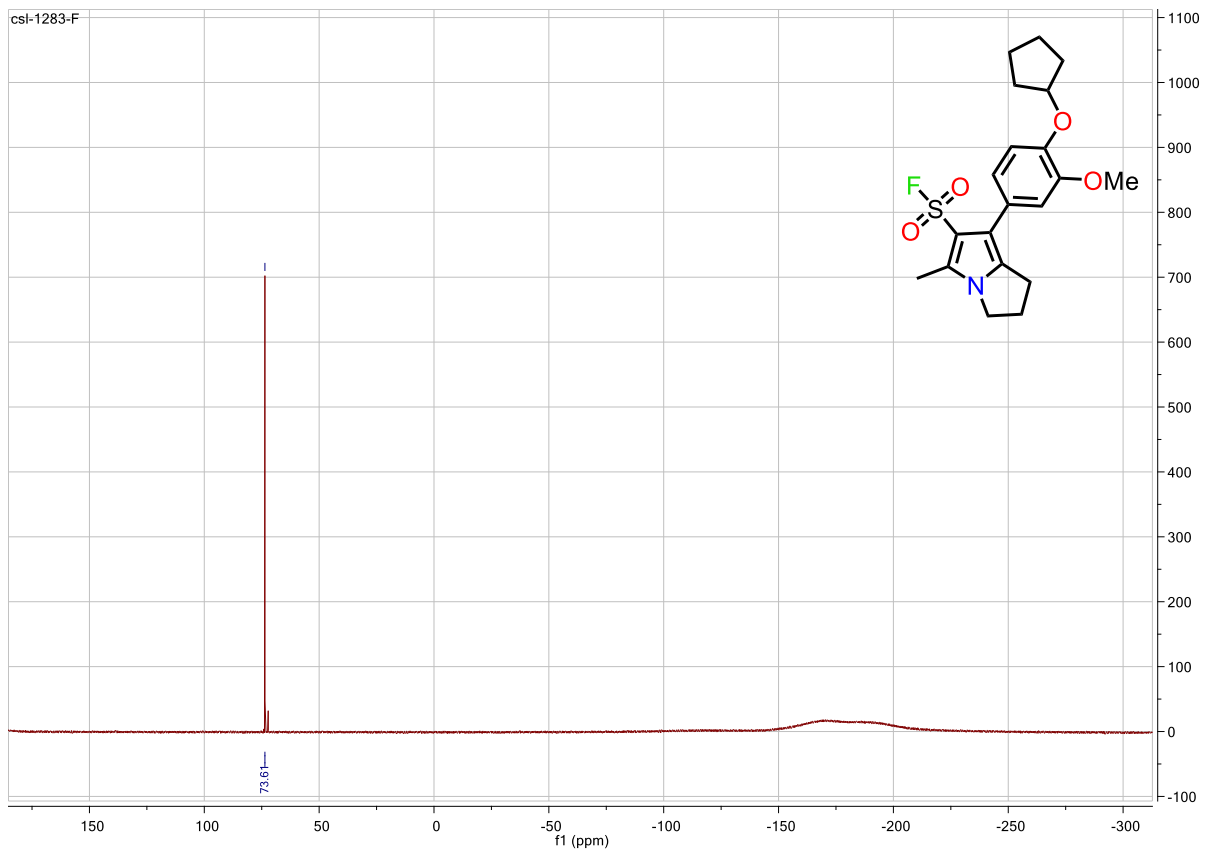



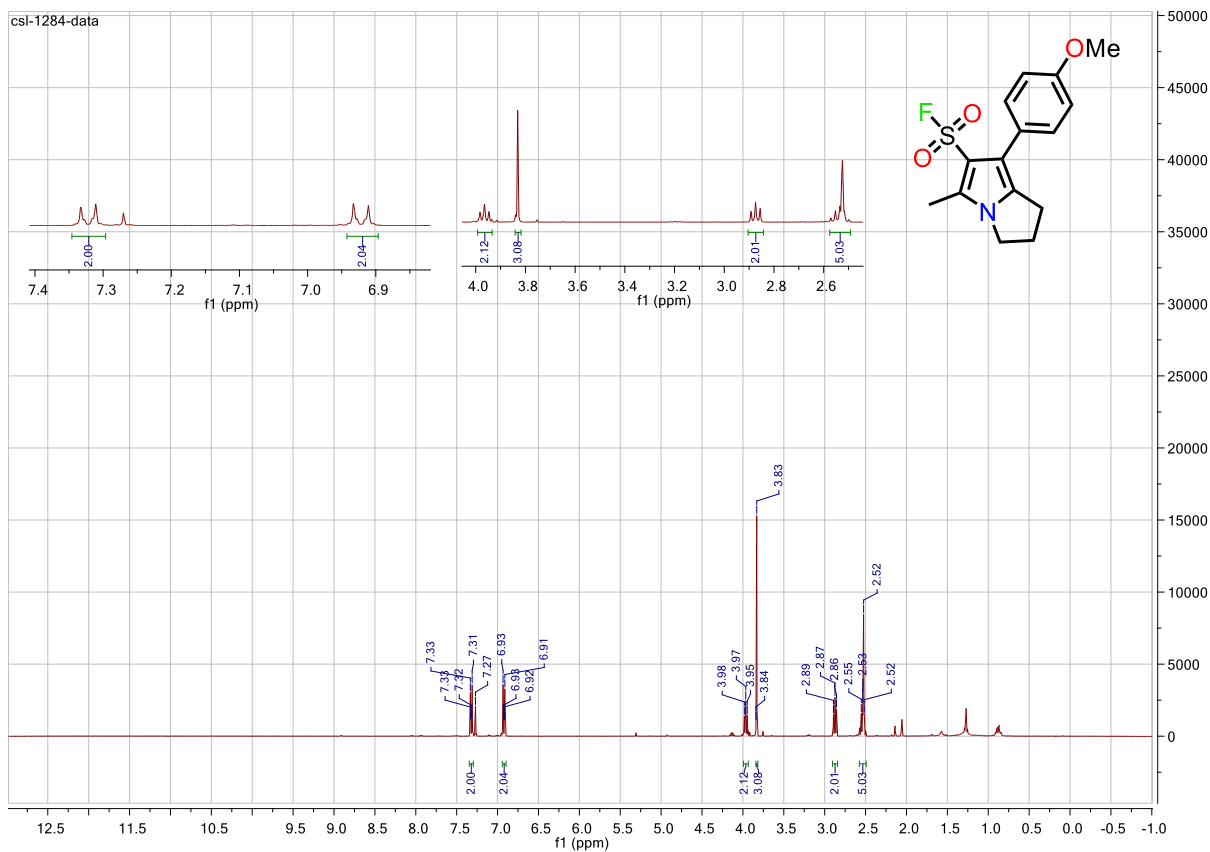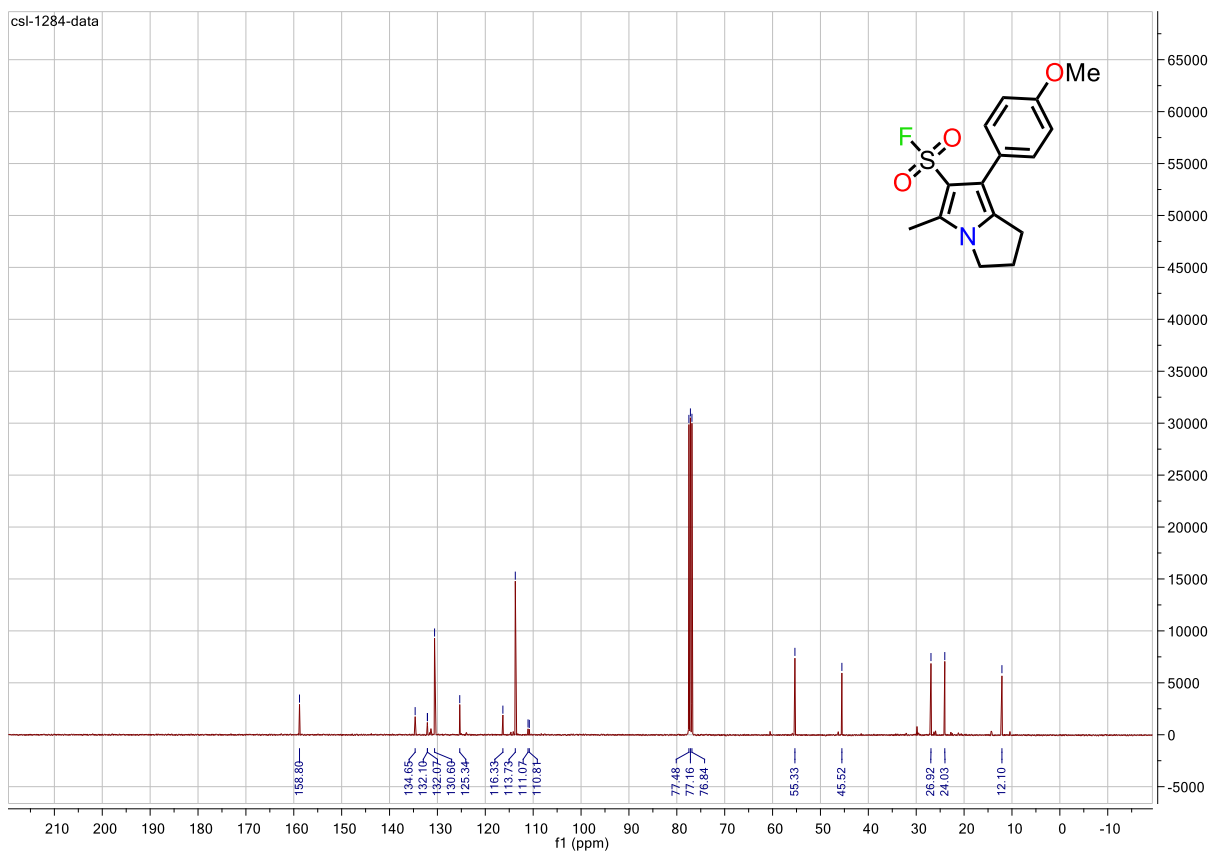

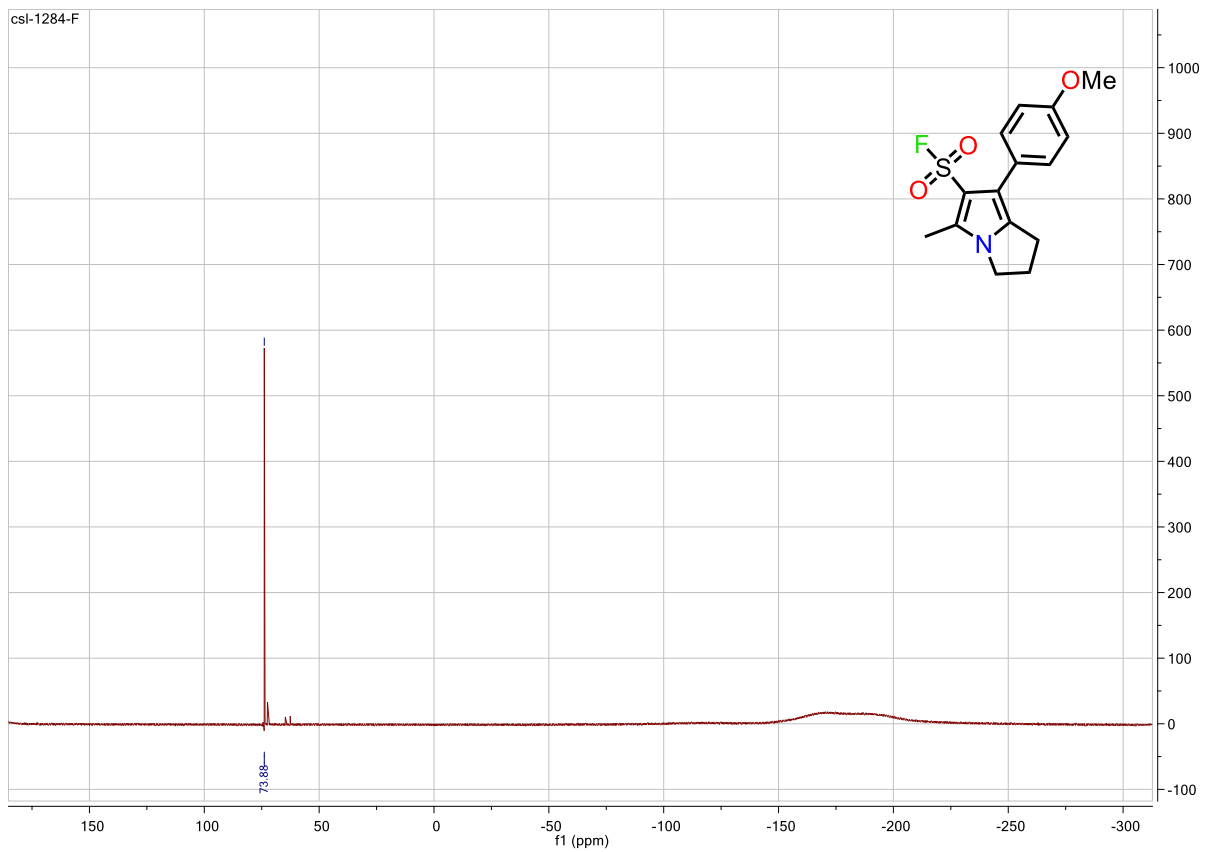

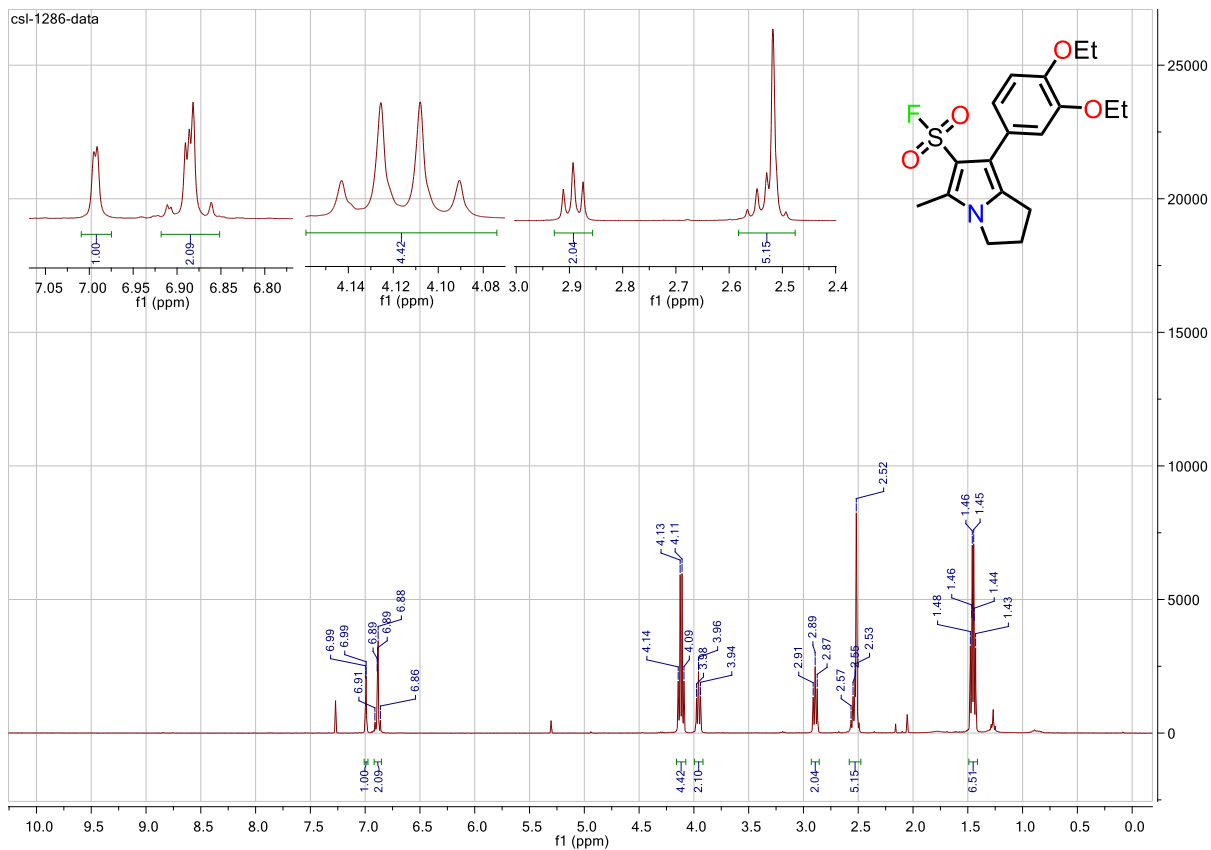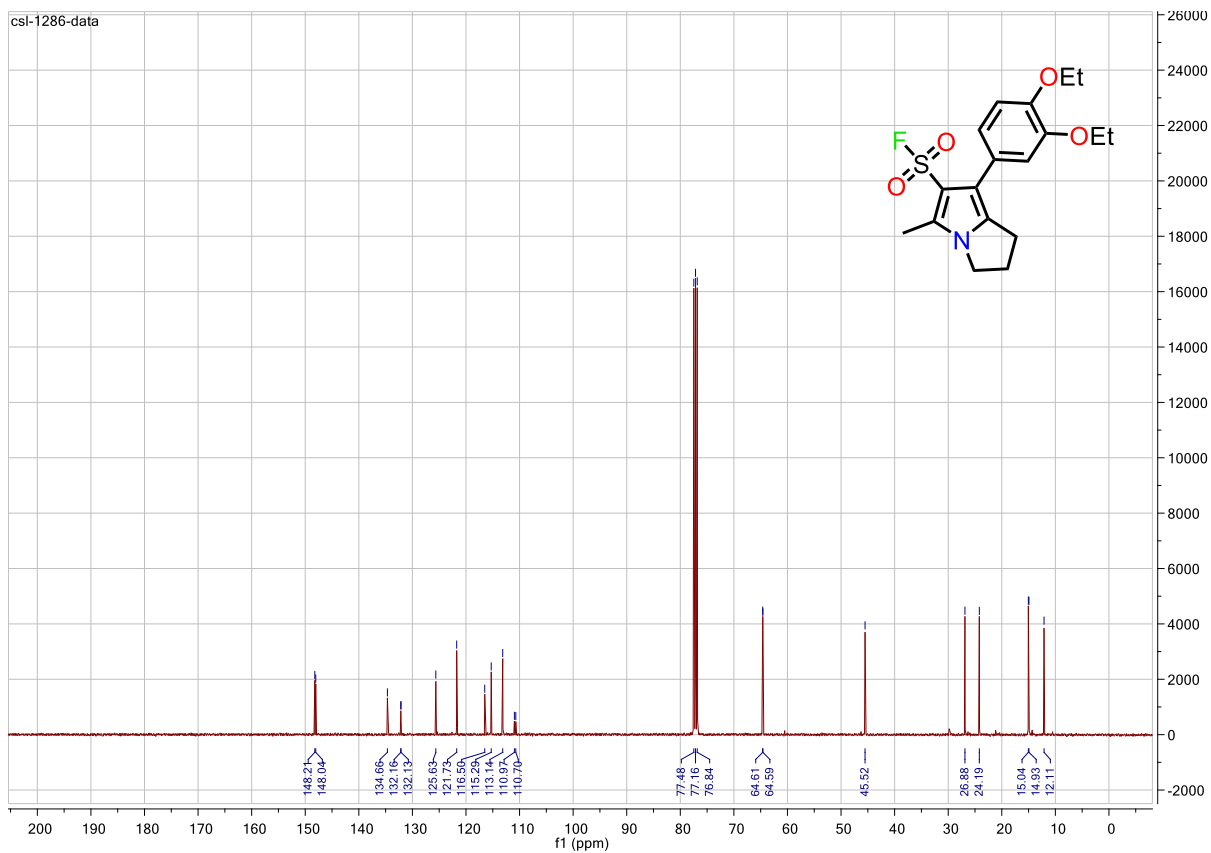

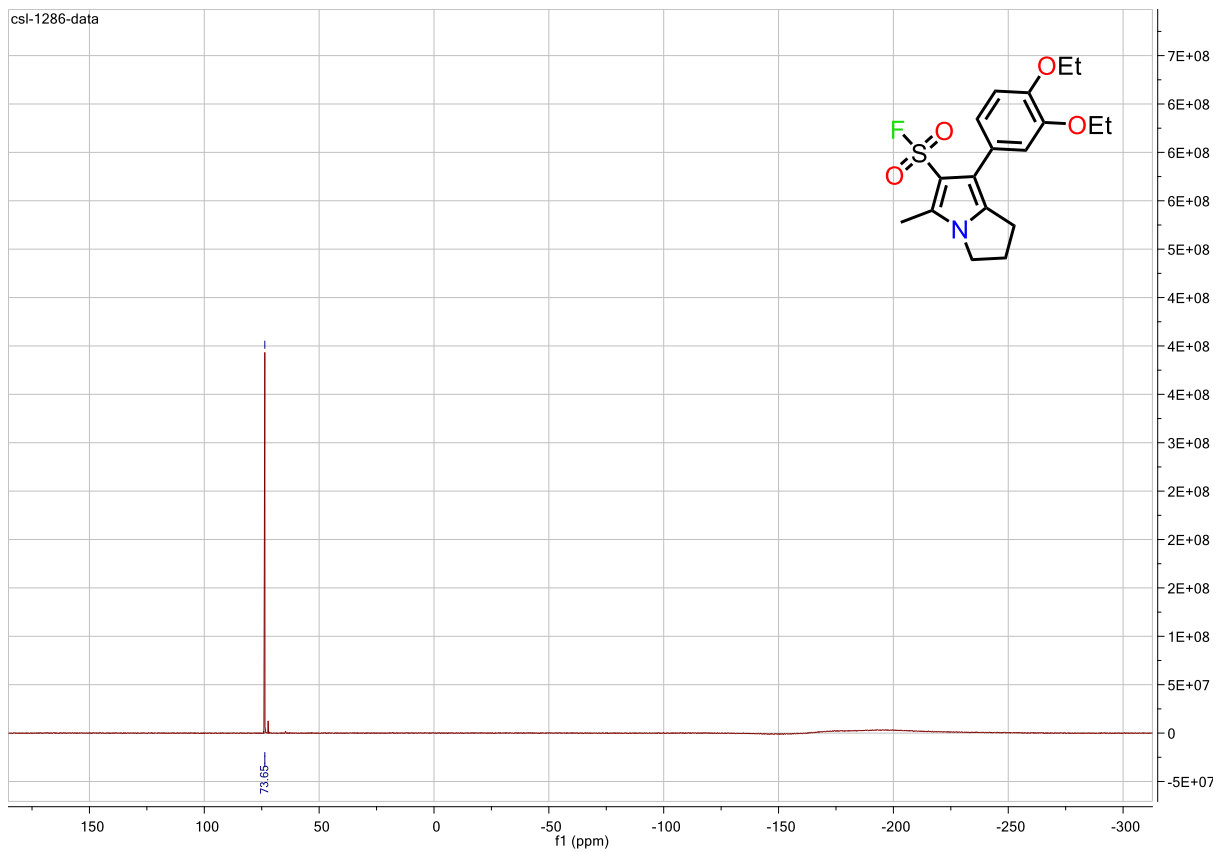

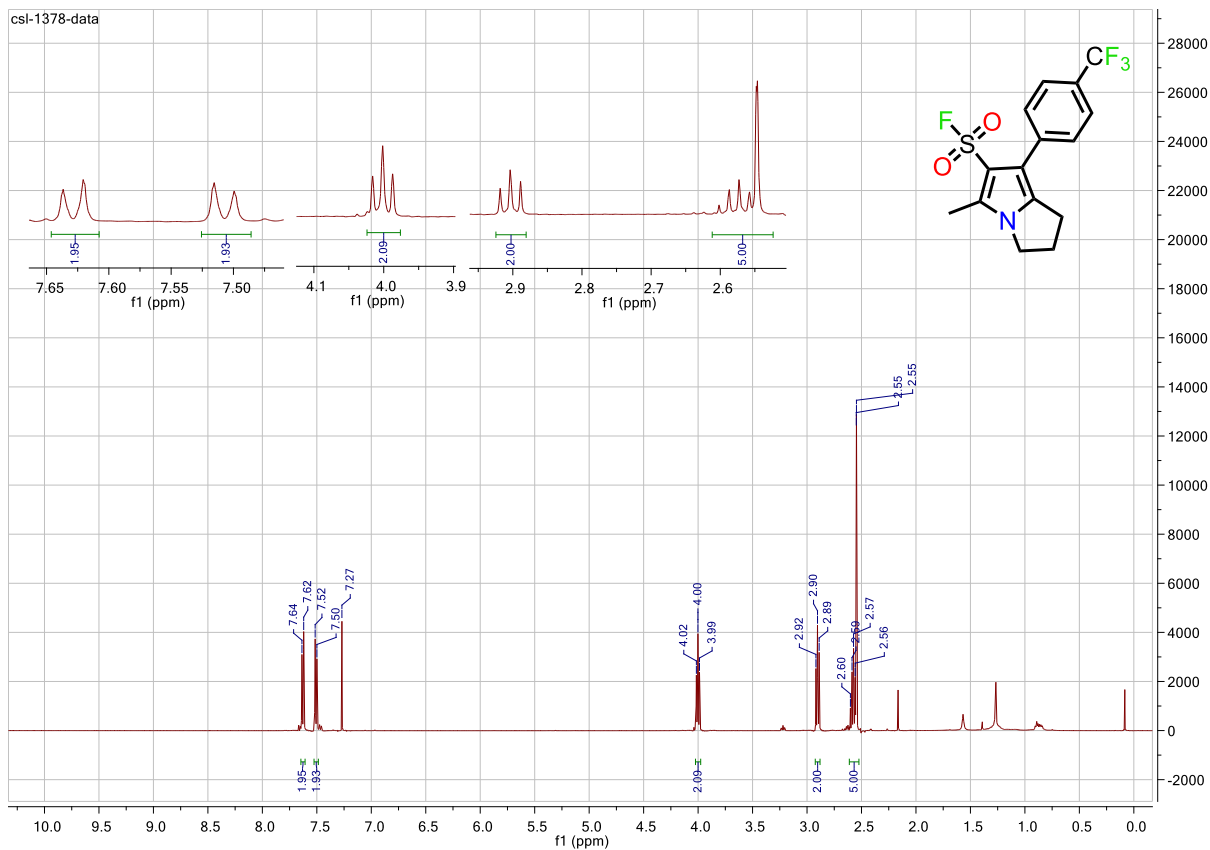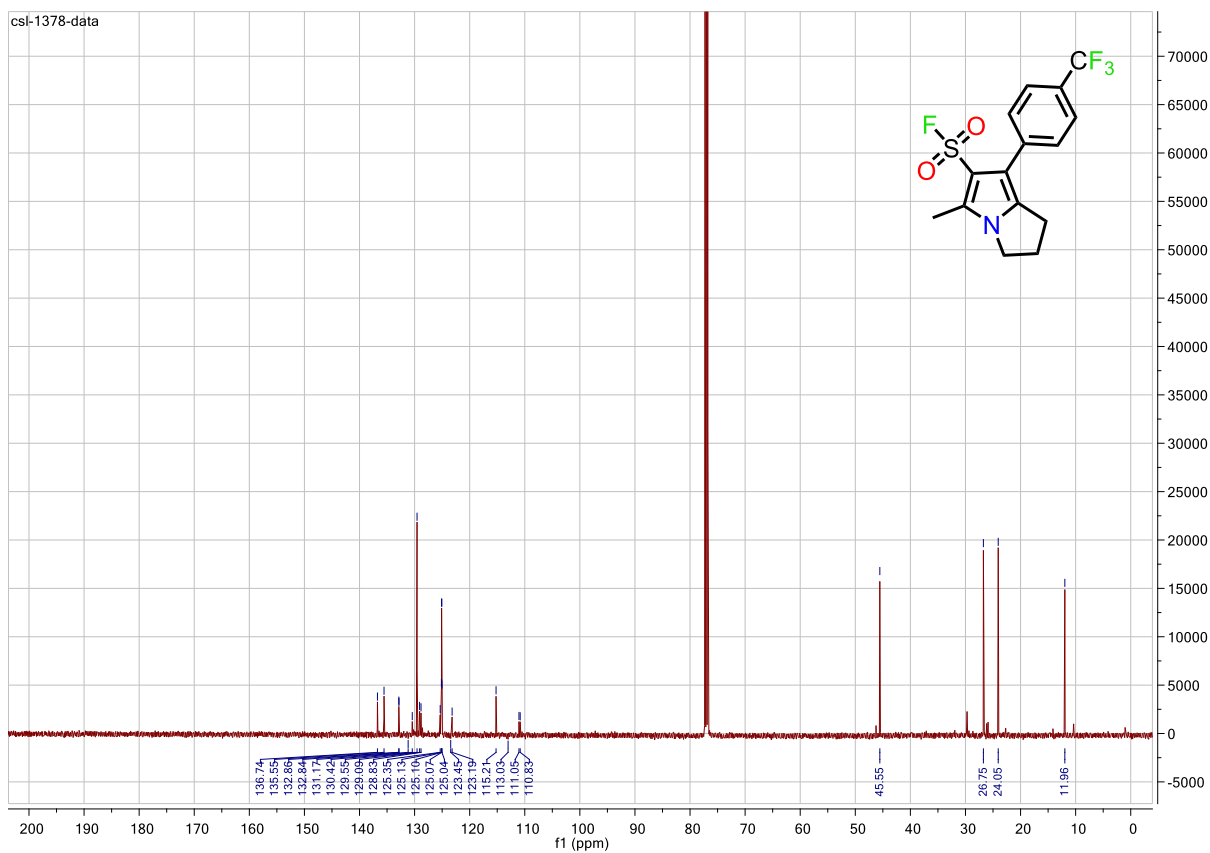

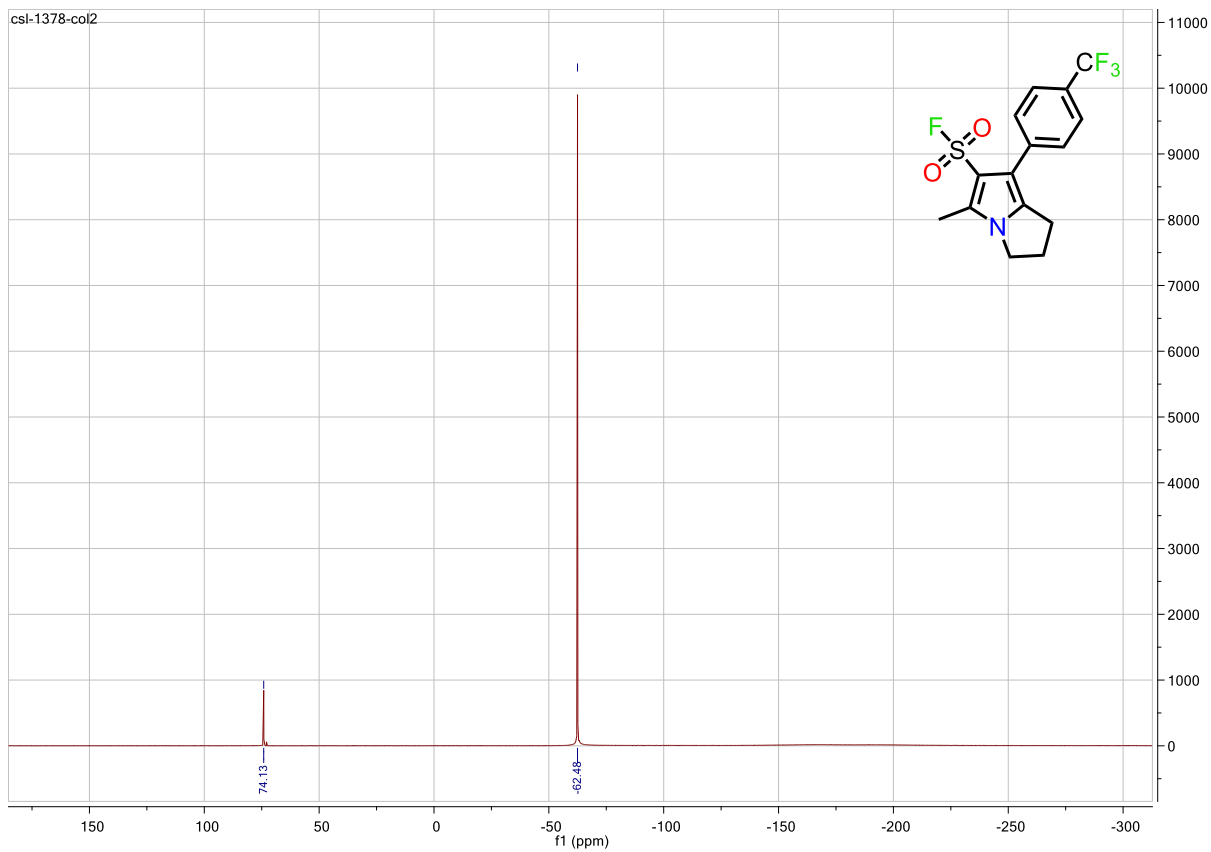

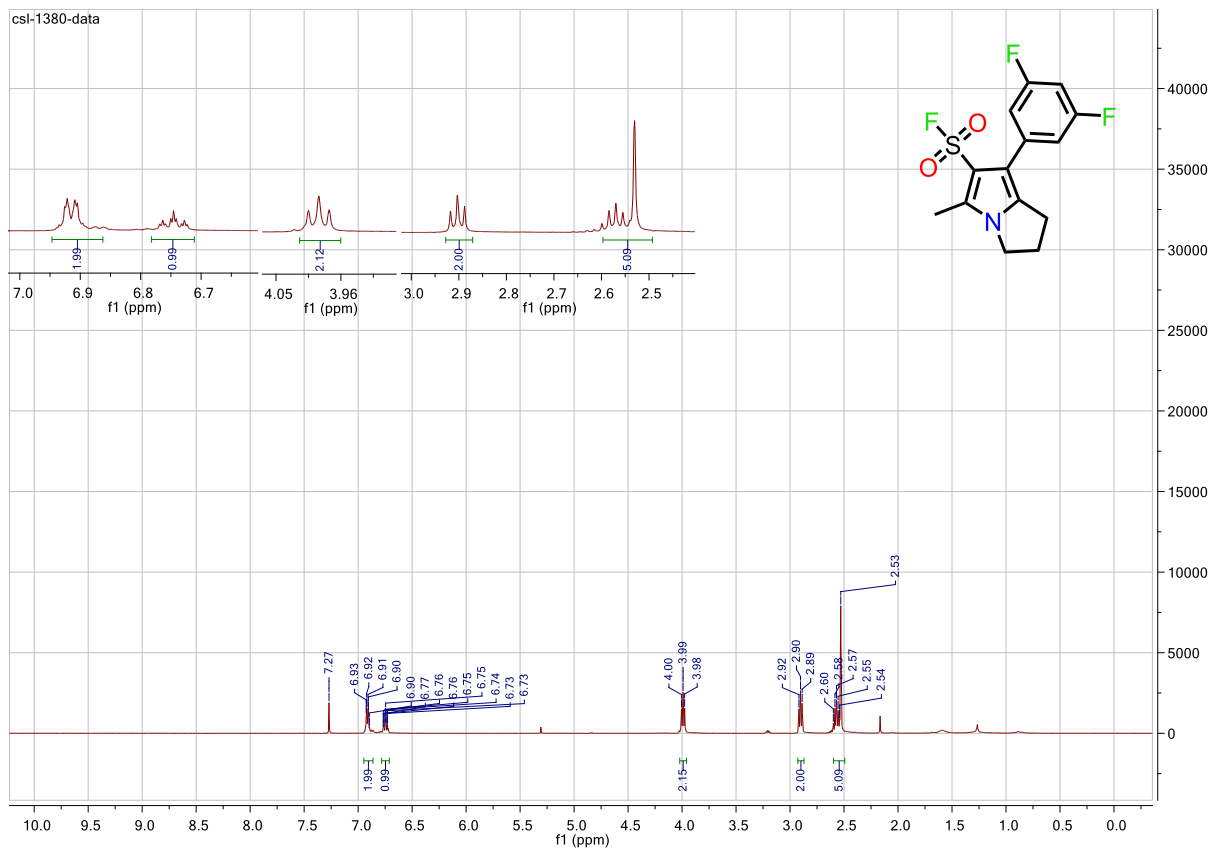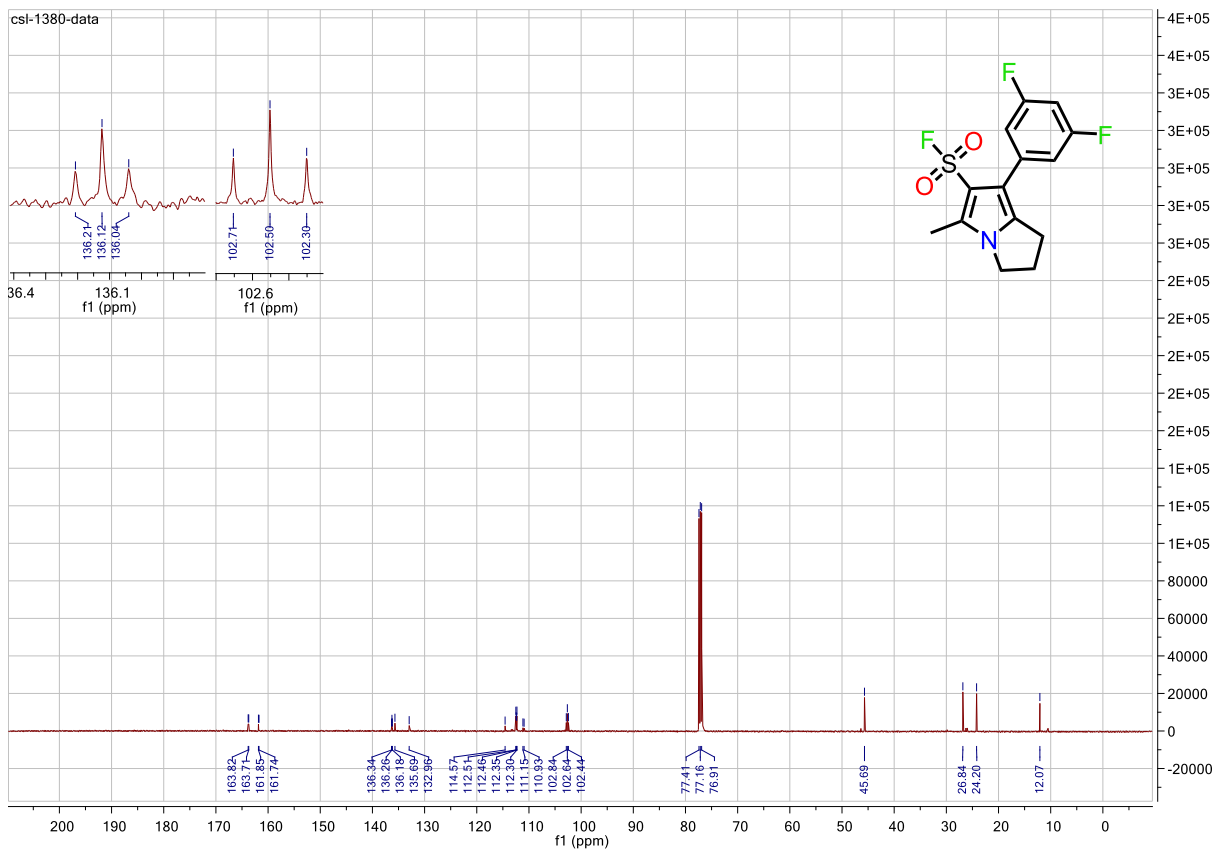

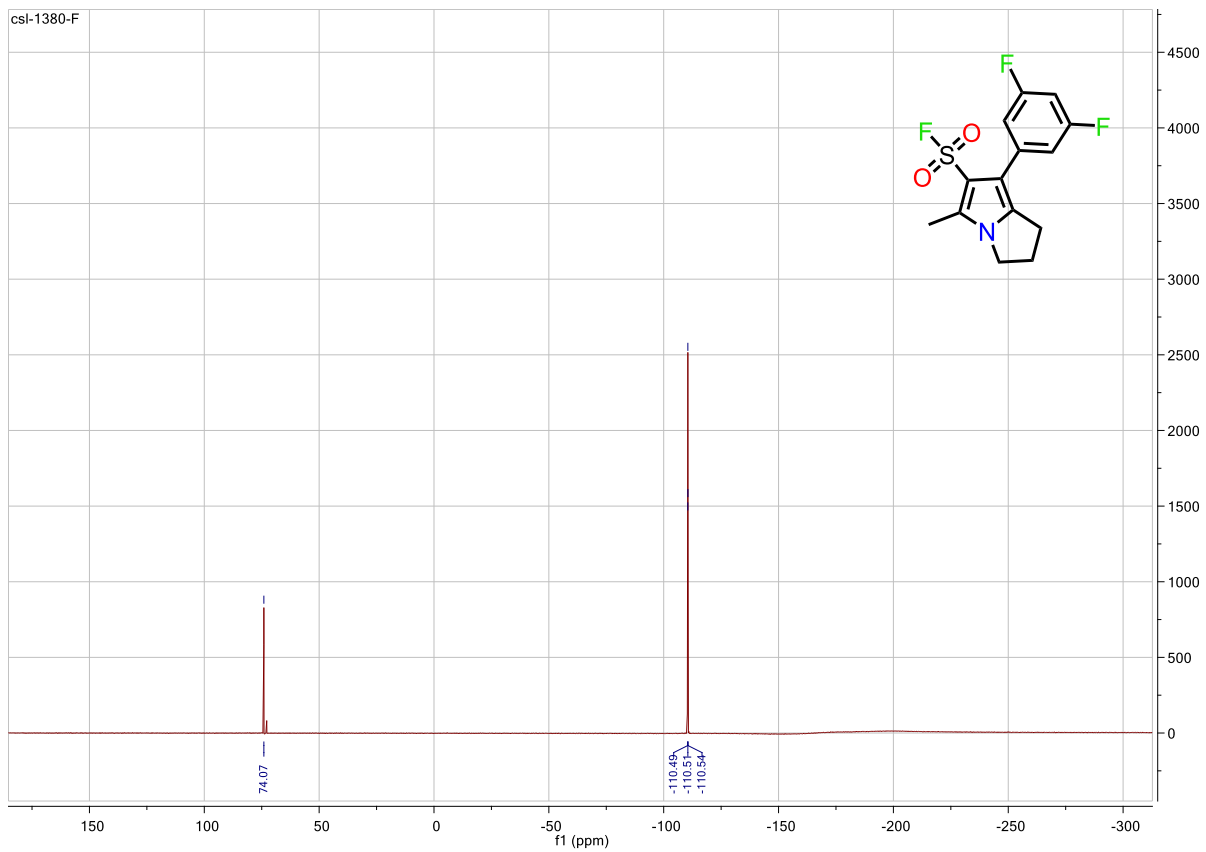





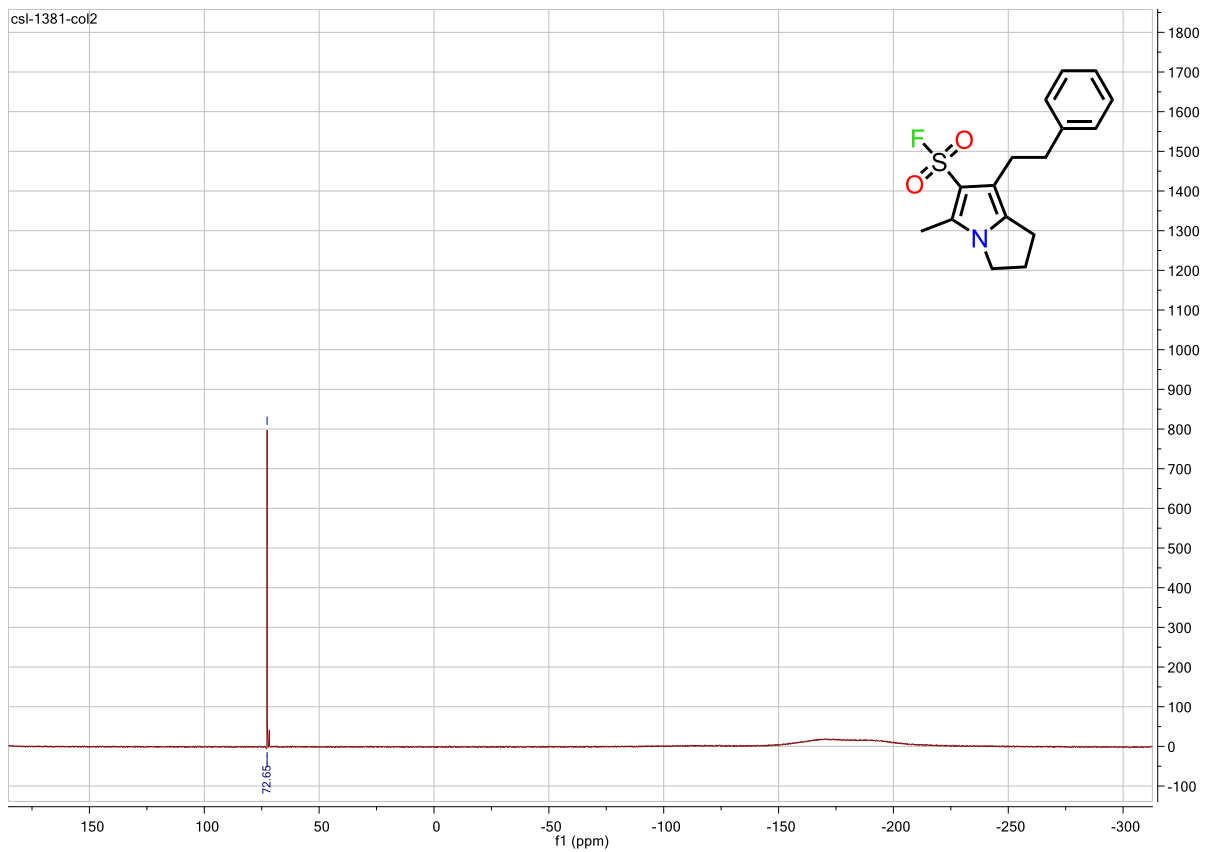



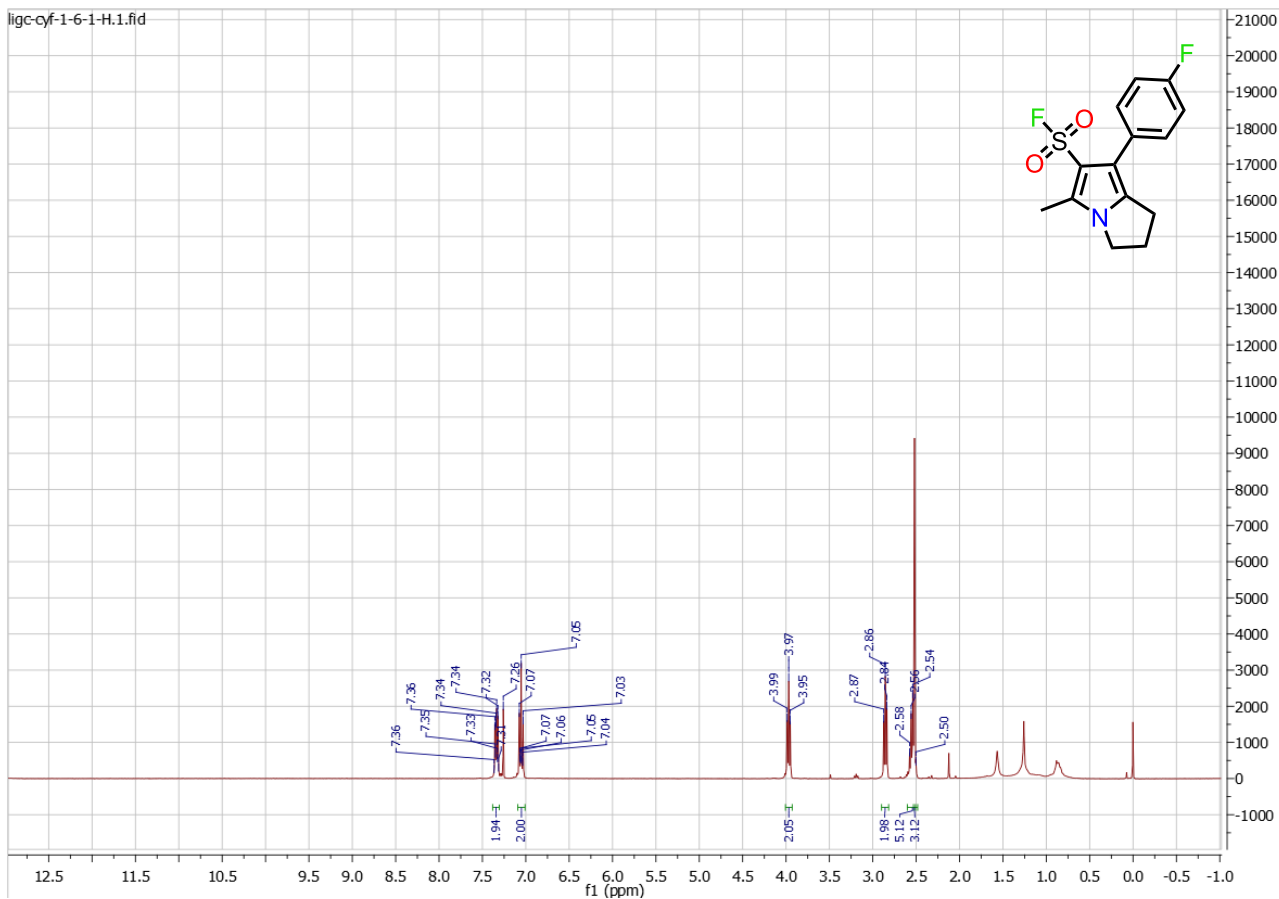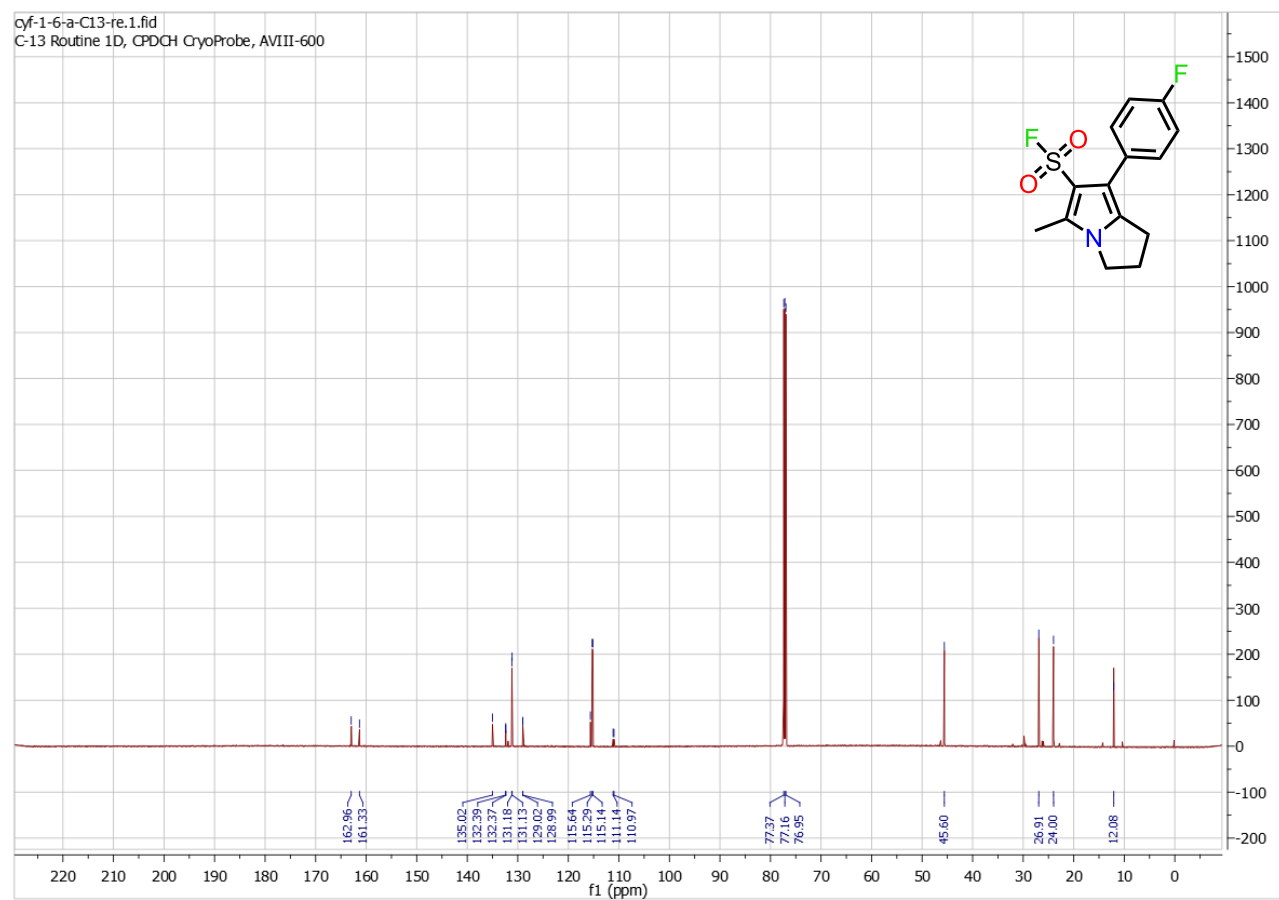

lig-cyf-1-6-1-F.1.fid  
AV400 BBOF Probe, F-19 in CDCl<sub>3</sub>, CFC13=0 ppm.

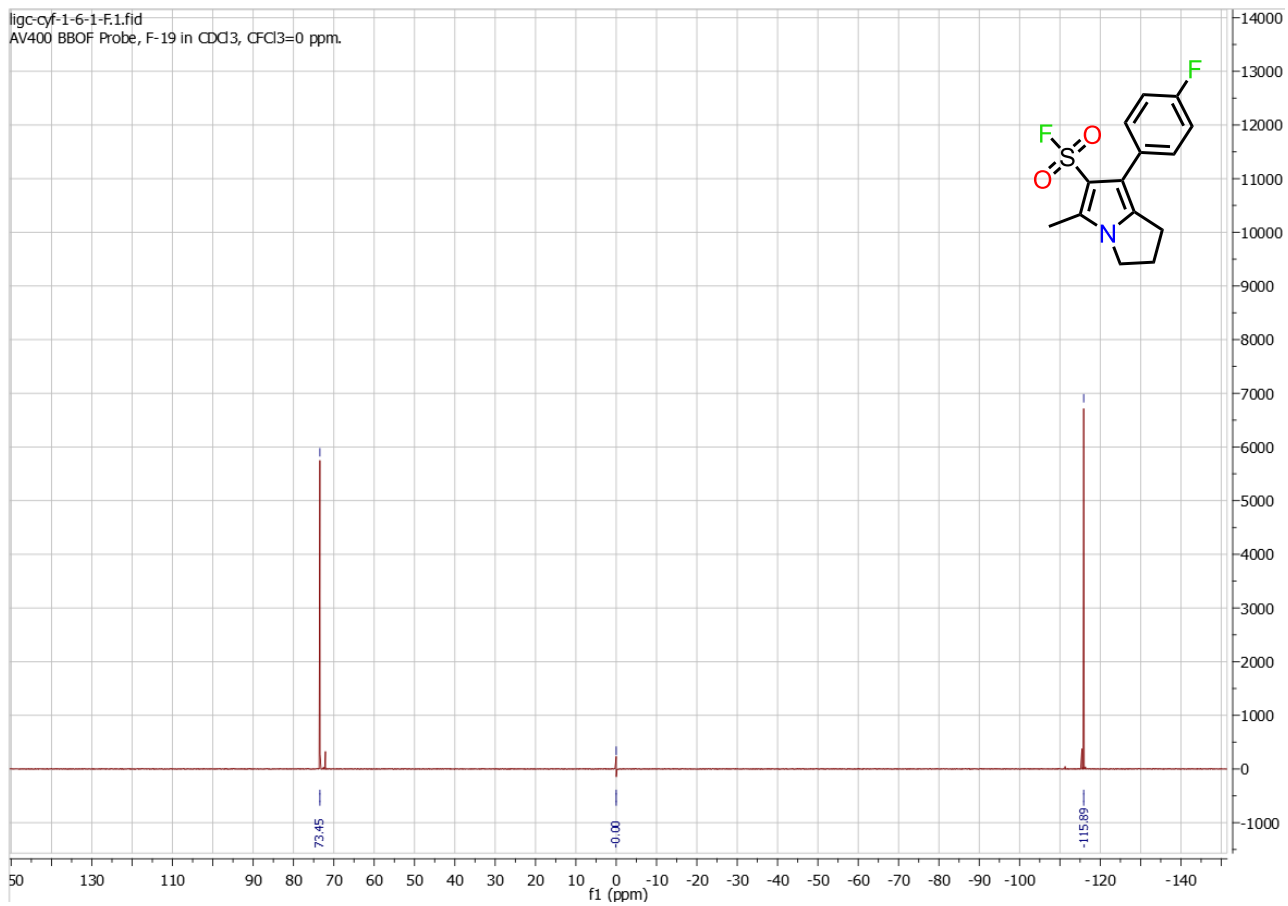

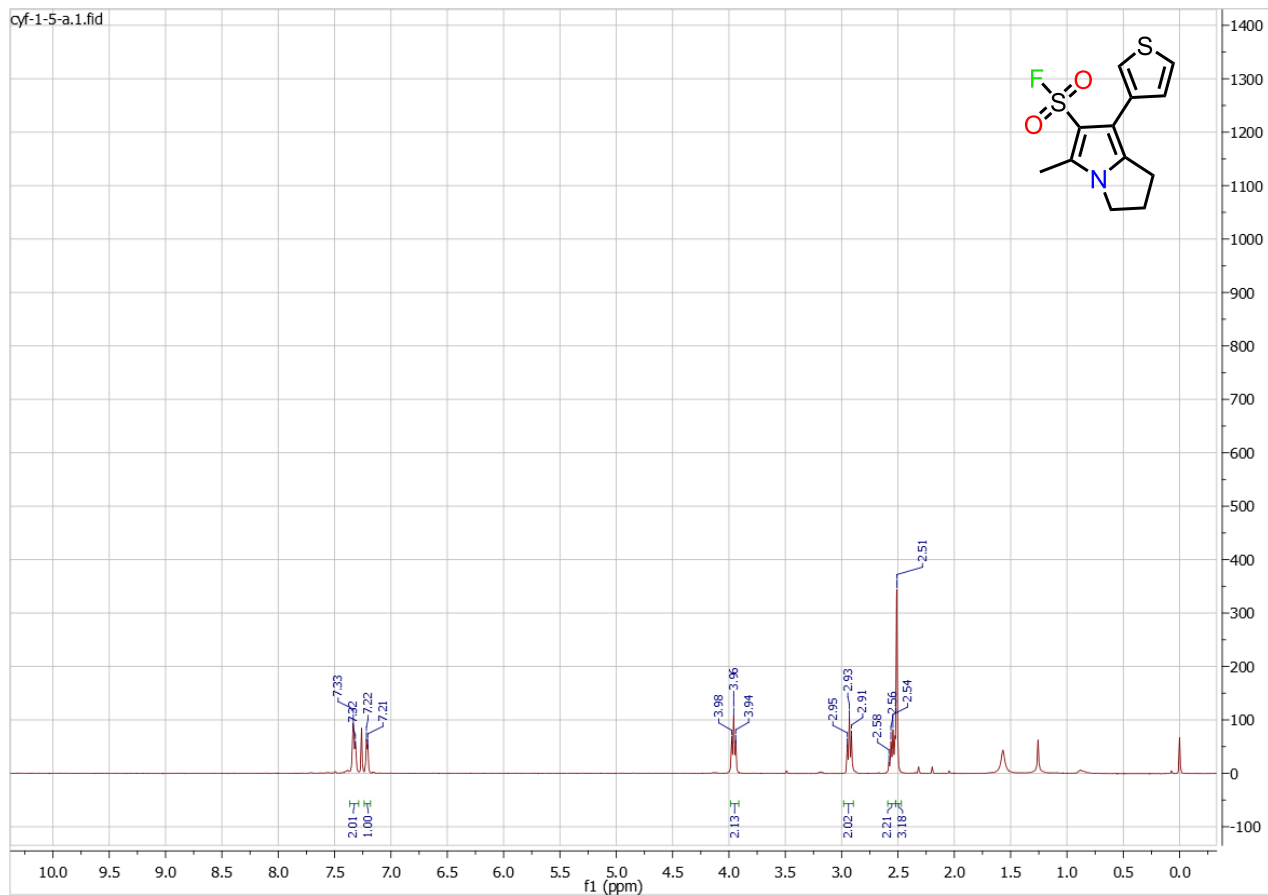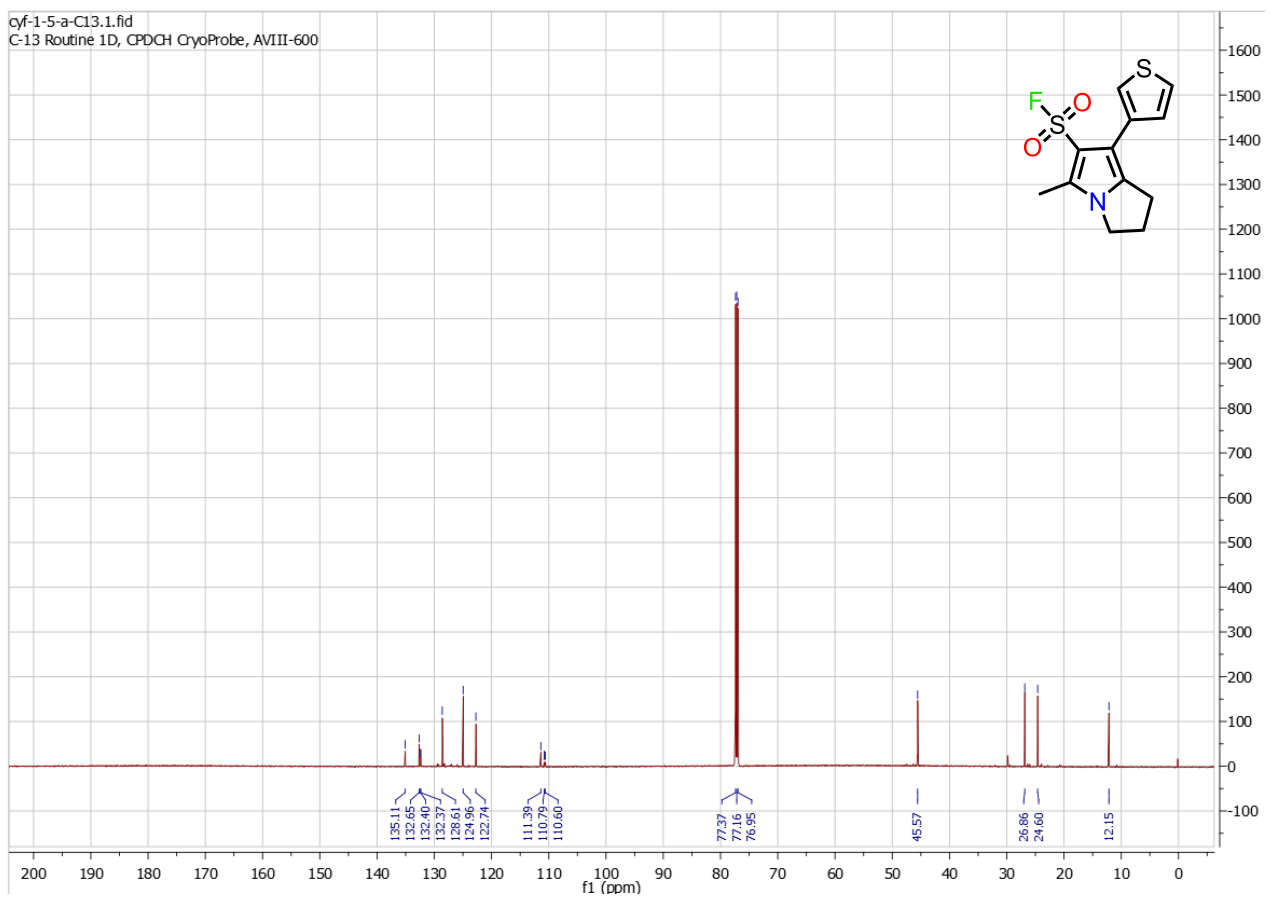

Cyf-1-5-a-F.1.fid  
F-19, CDCl<sub>3</sub>, DPX-400 QNP Probe. CF<sub>3</sub>Cl as Ref at 0 ppm.

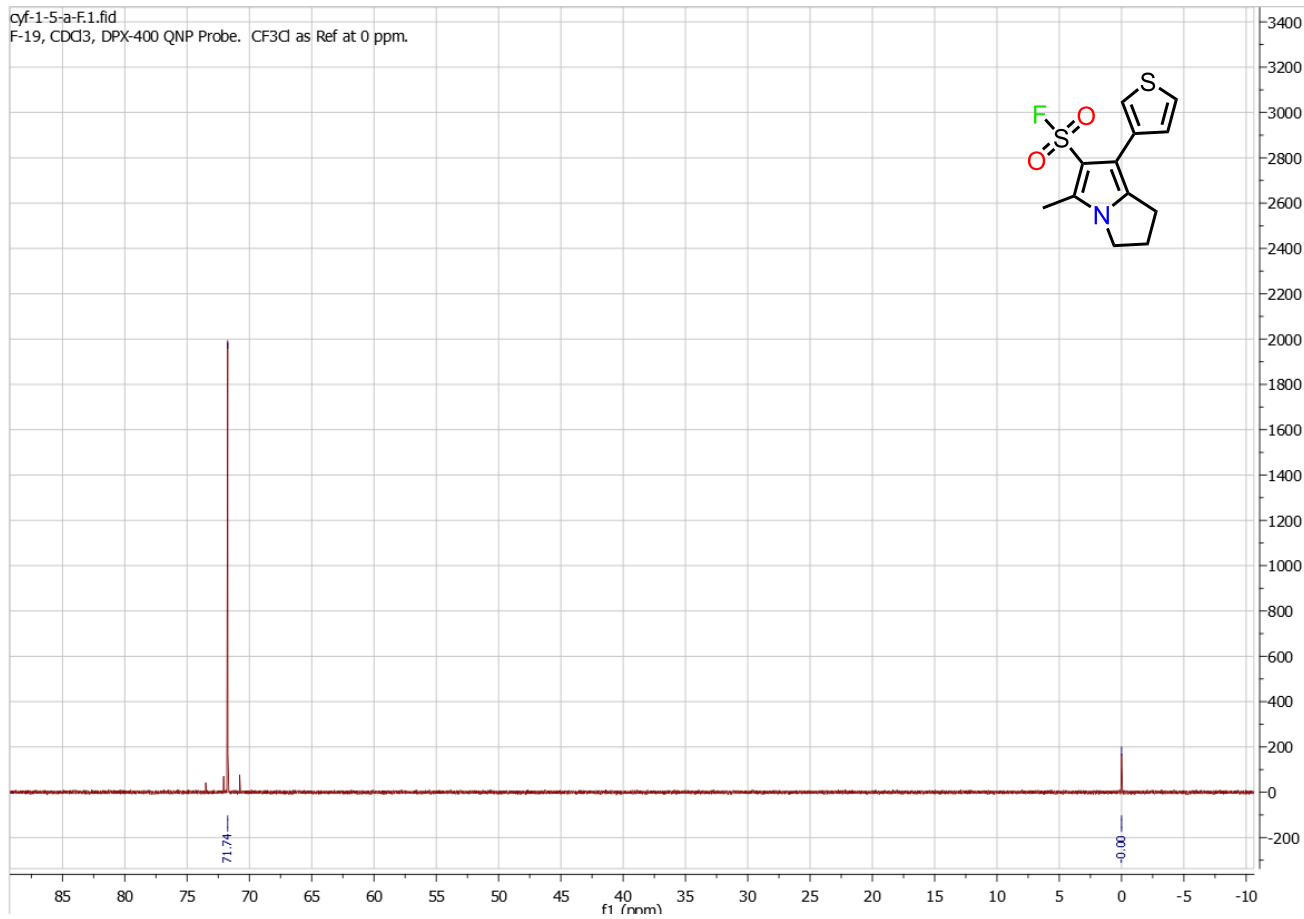

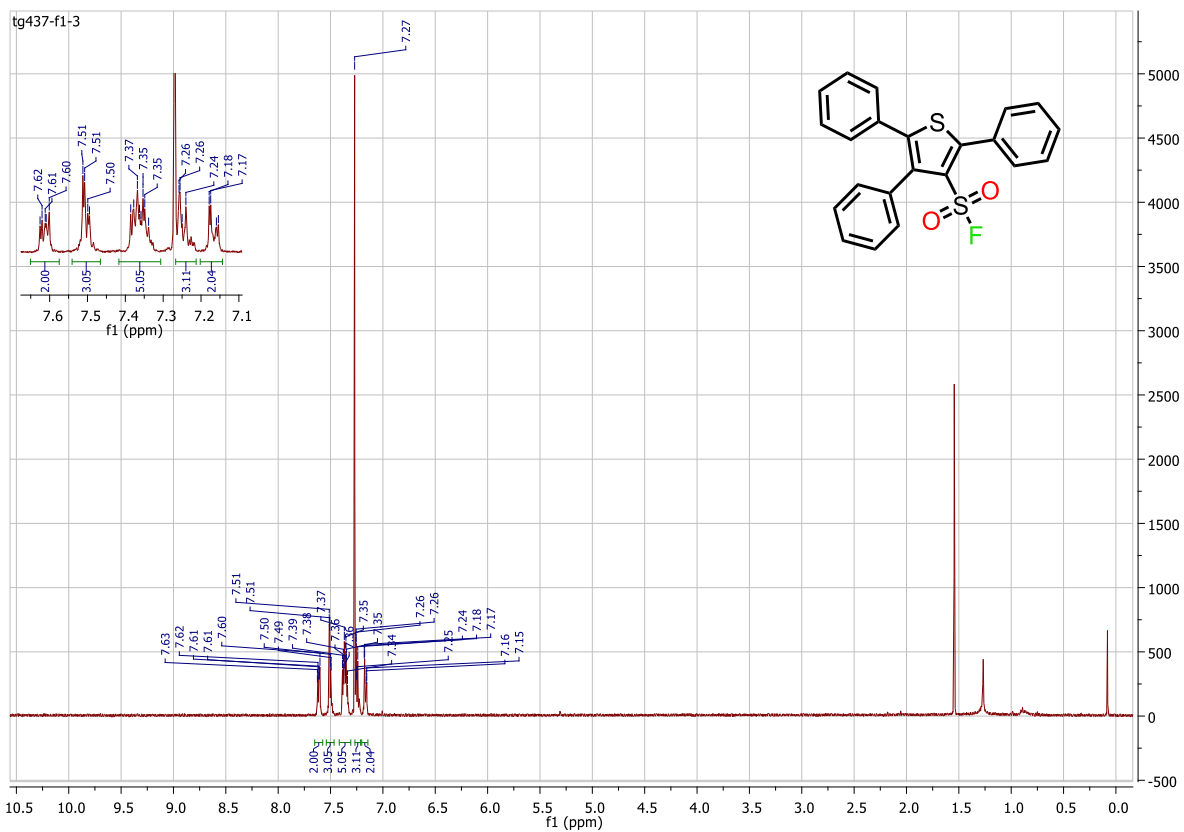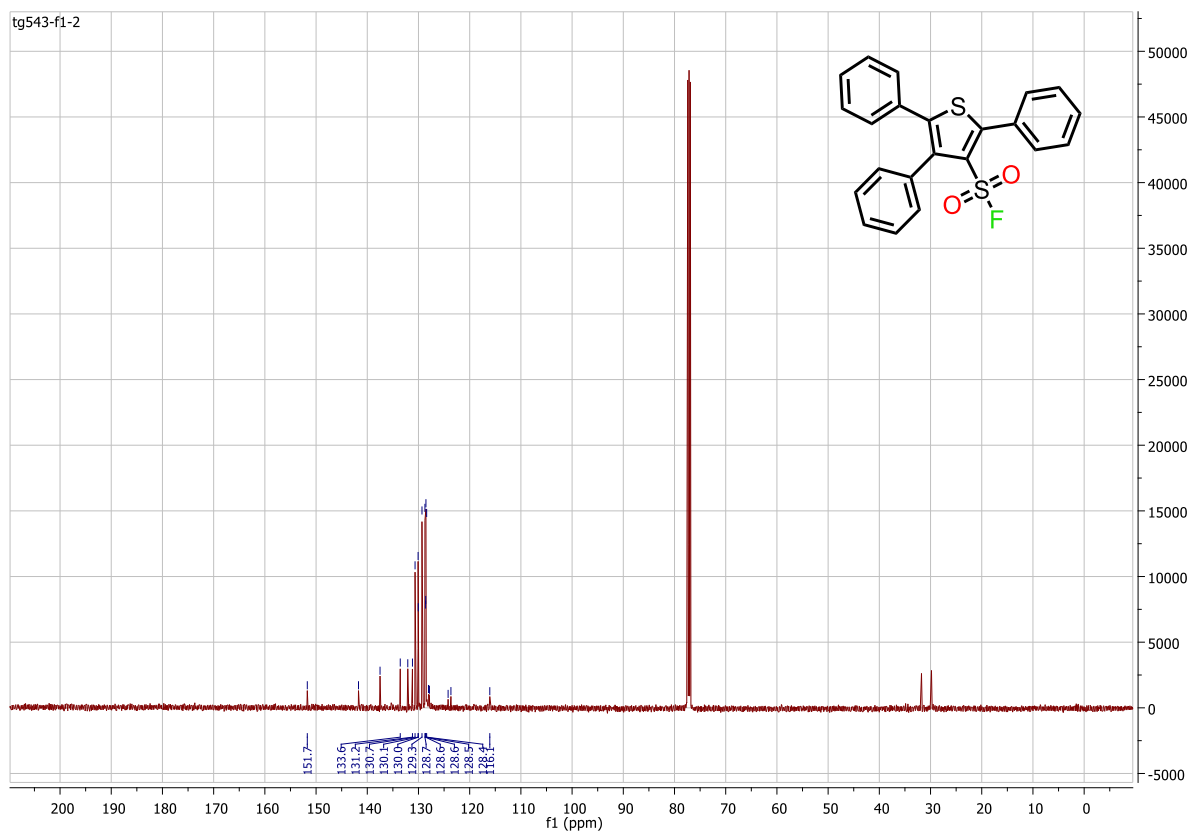



tg543-f1

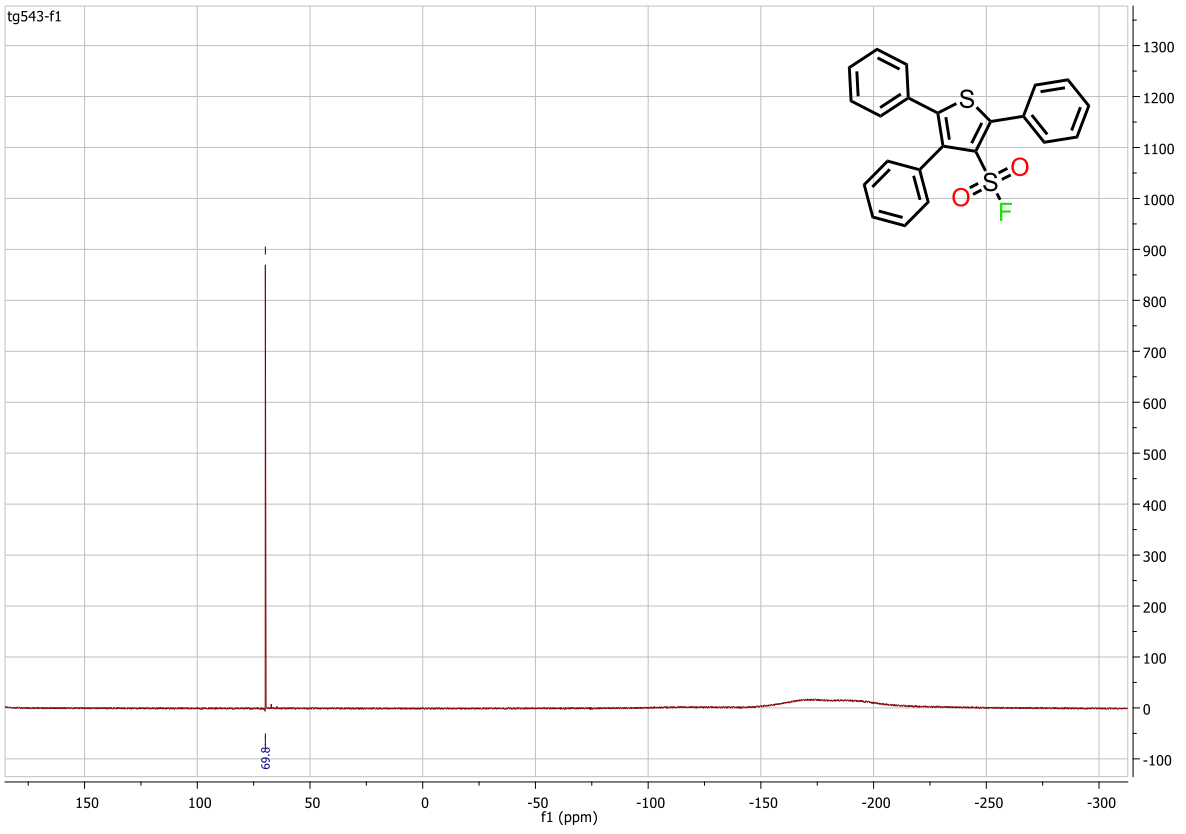

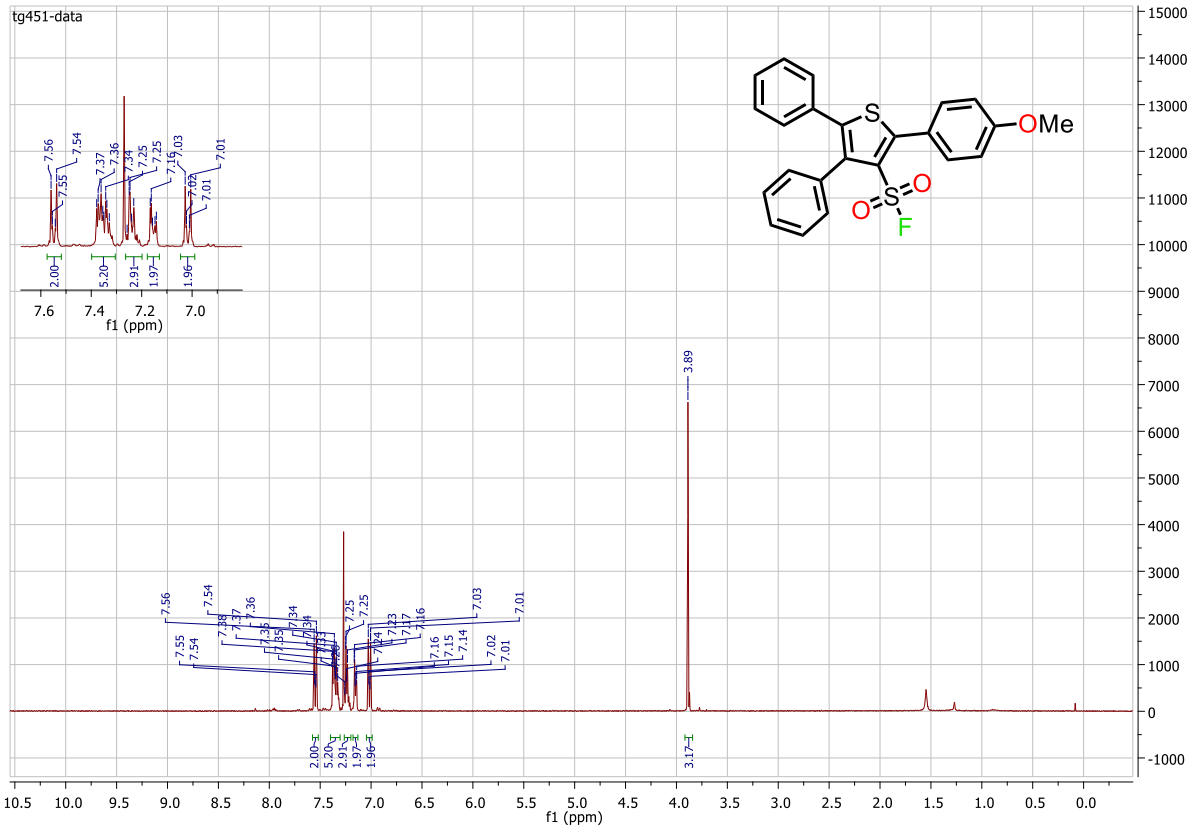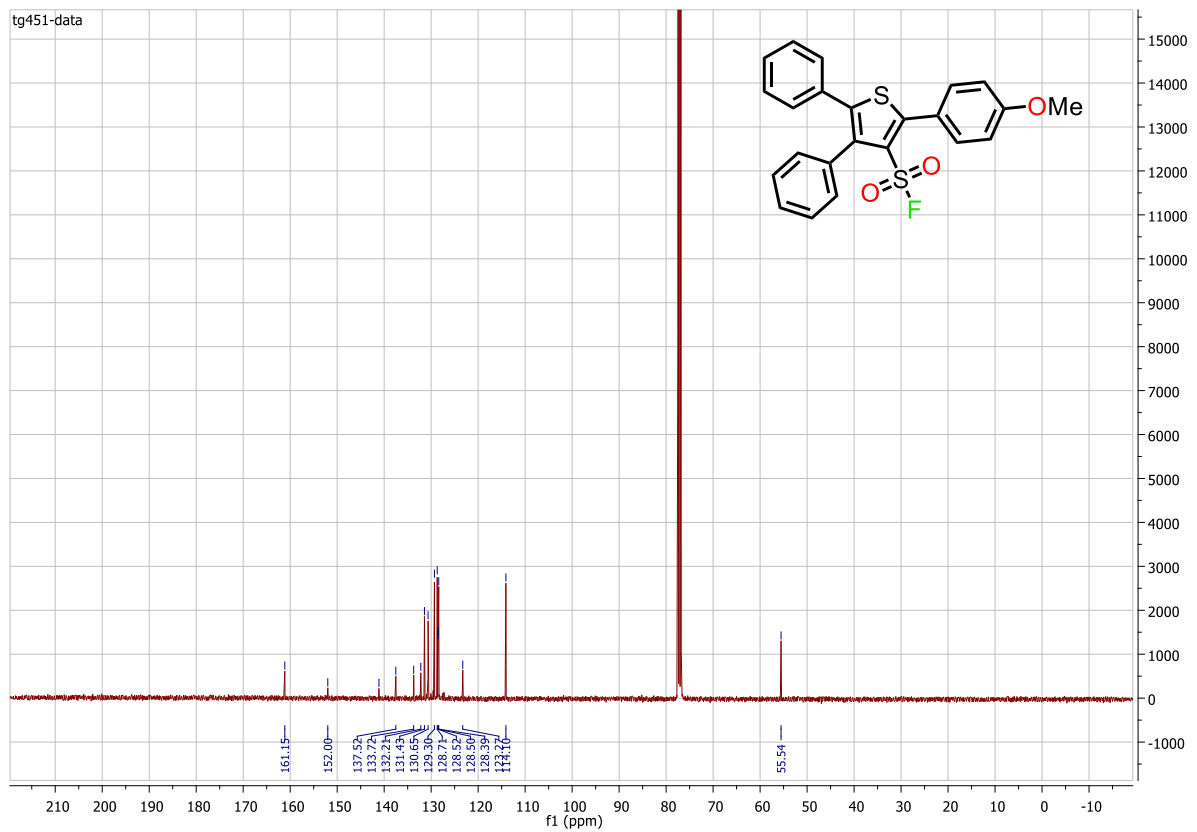

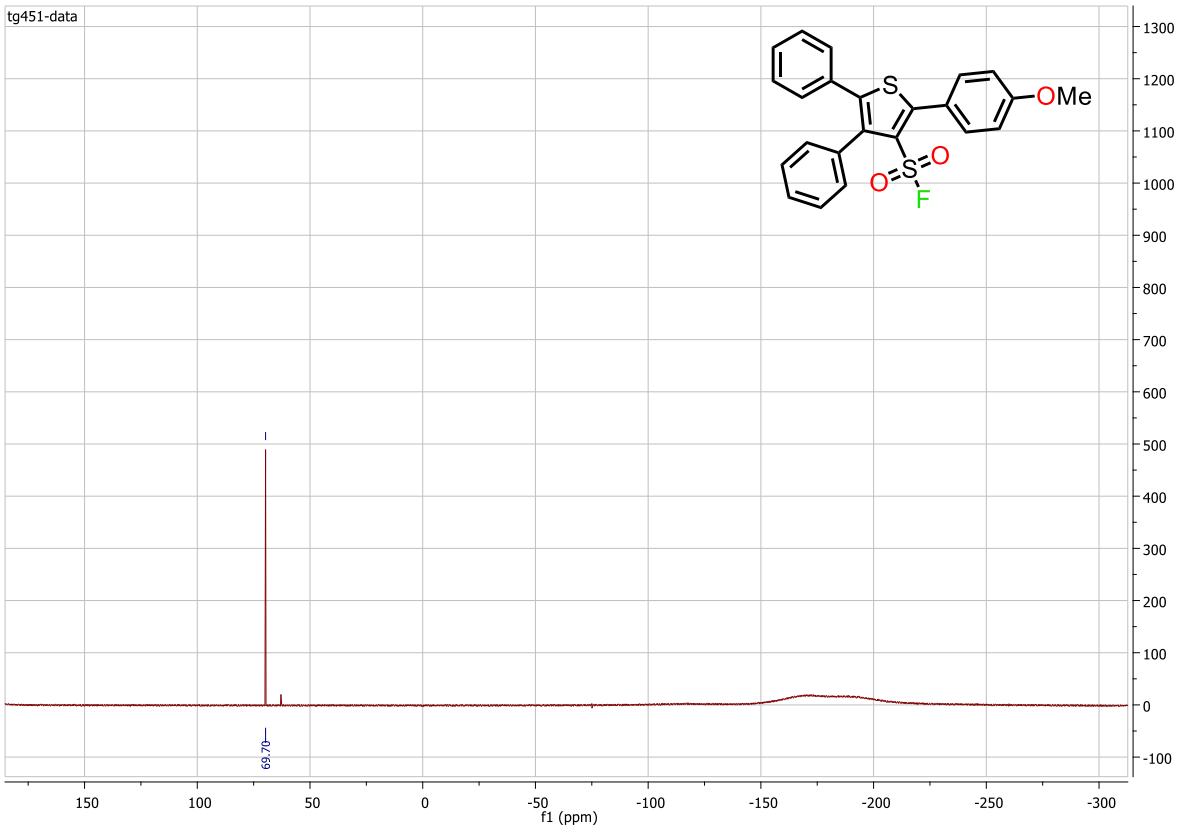

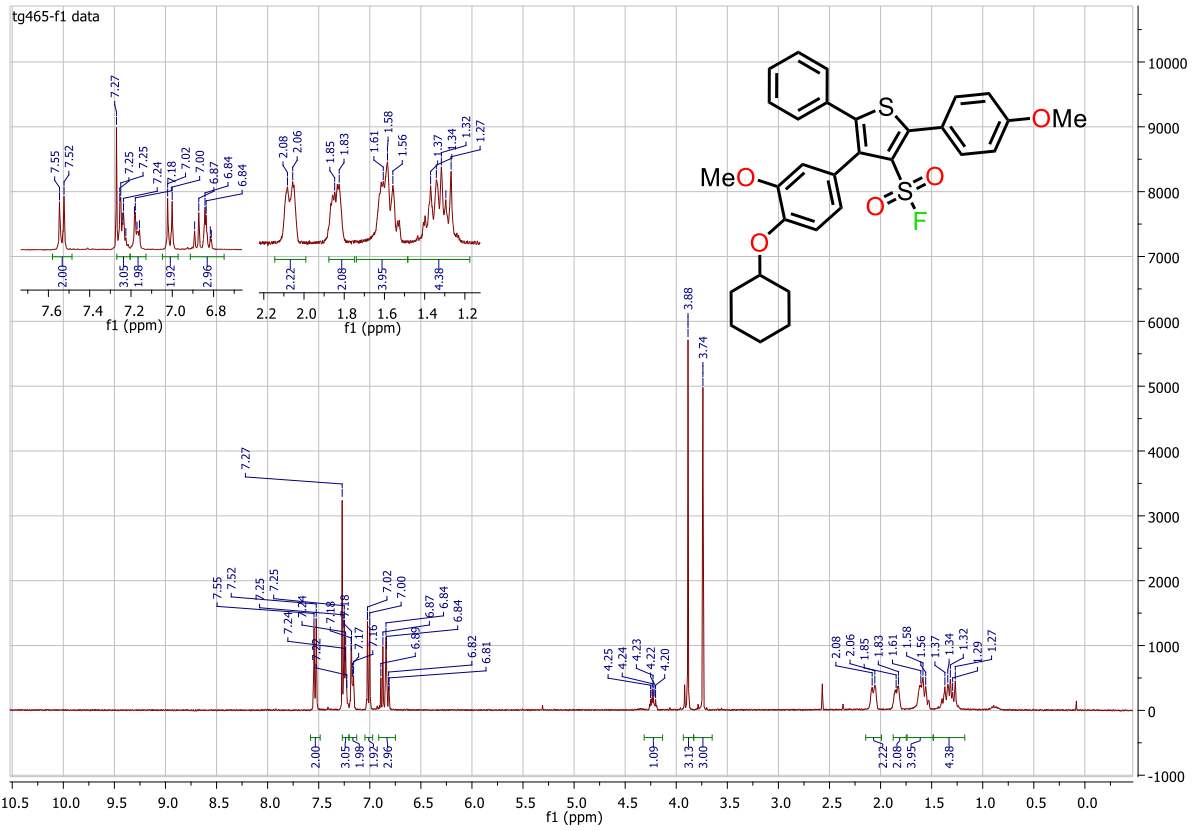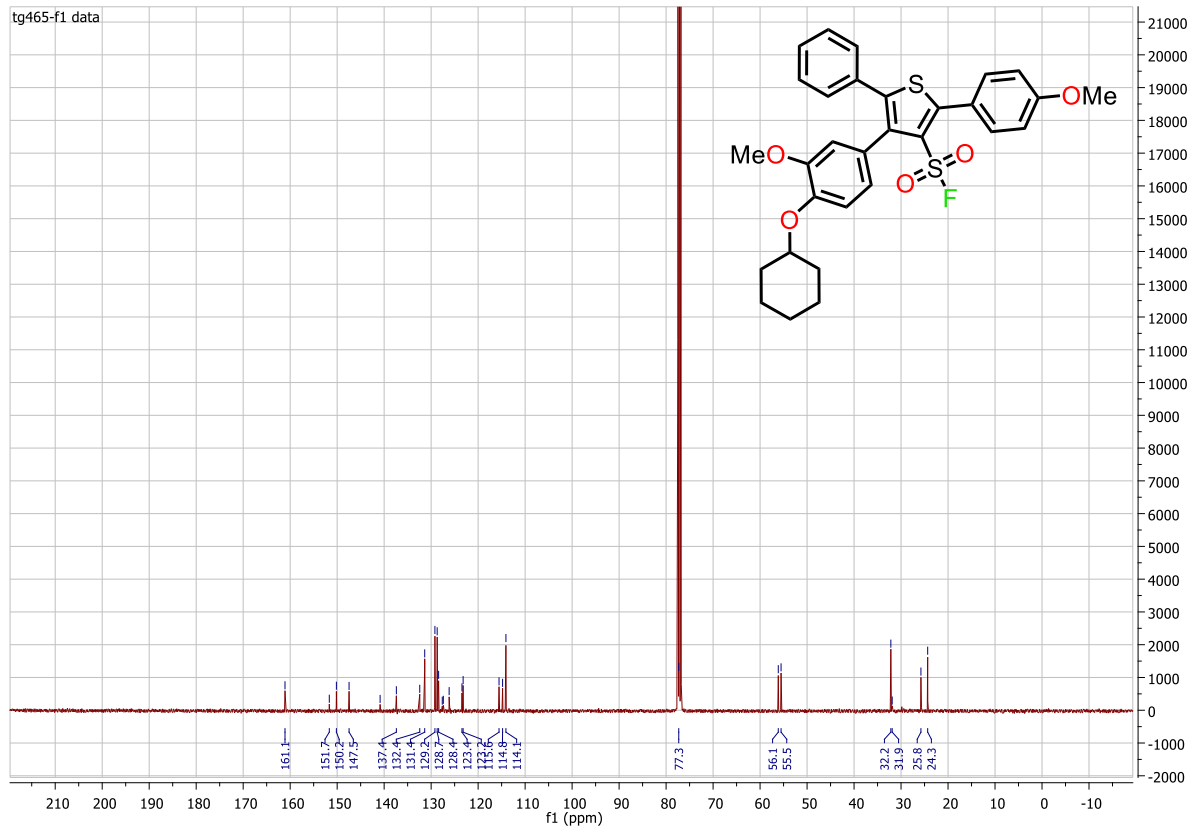

tg465-f1 data

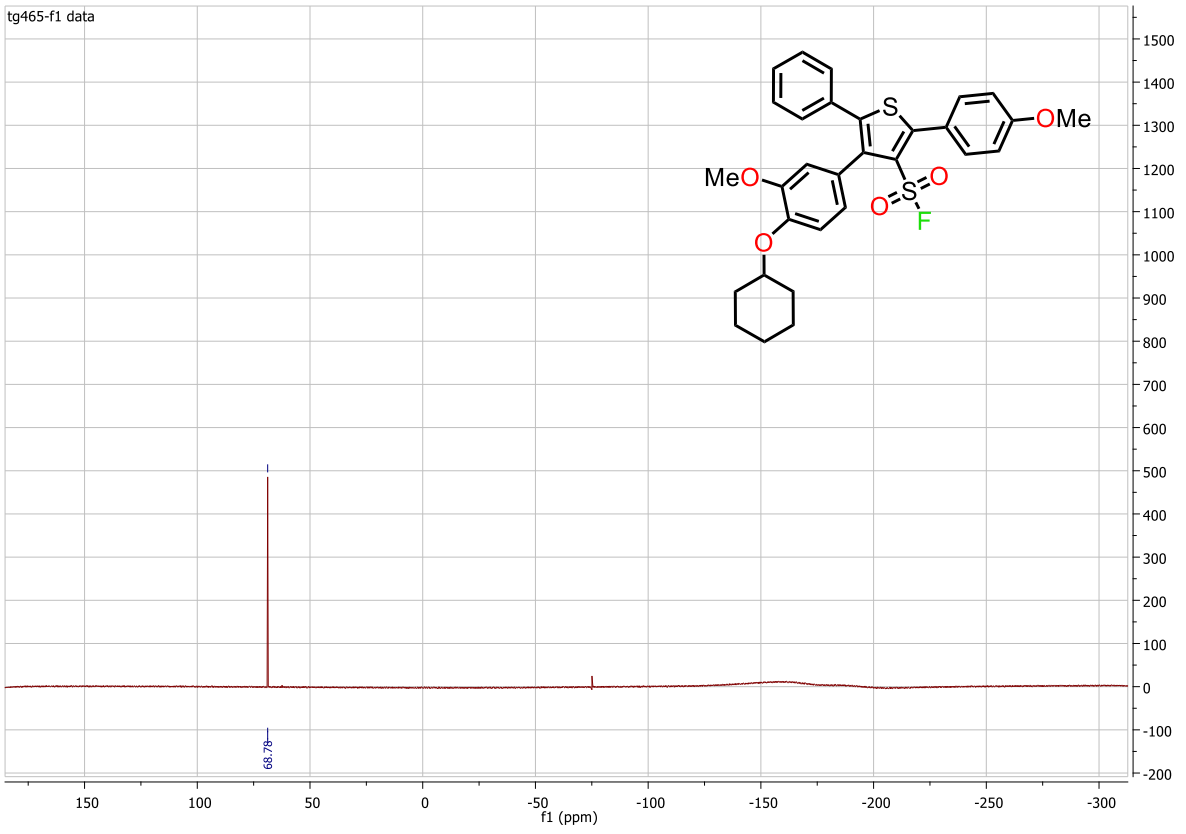

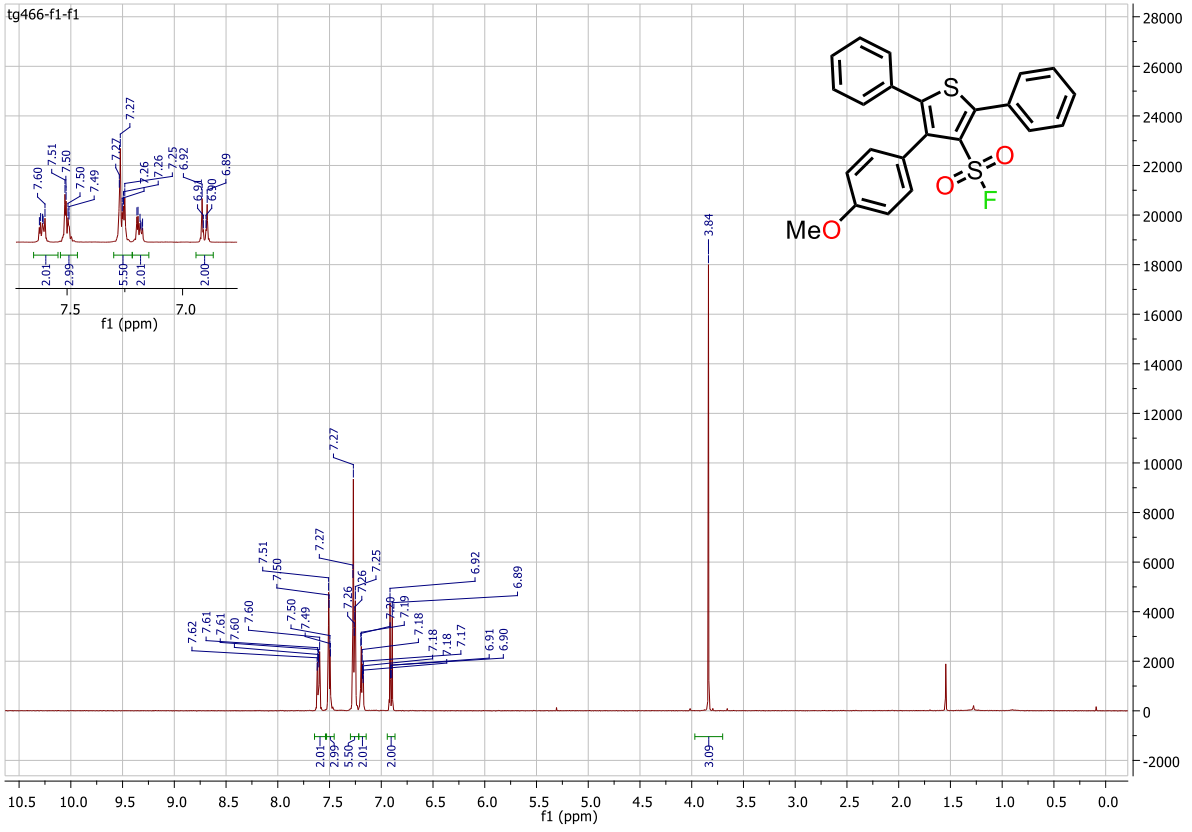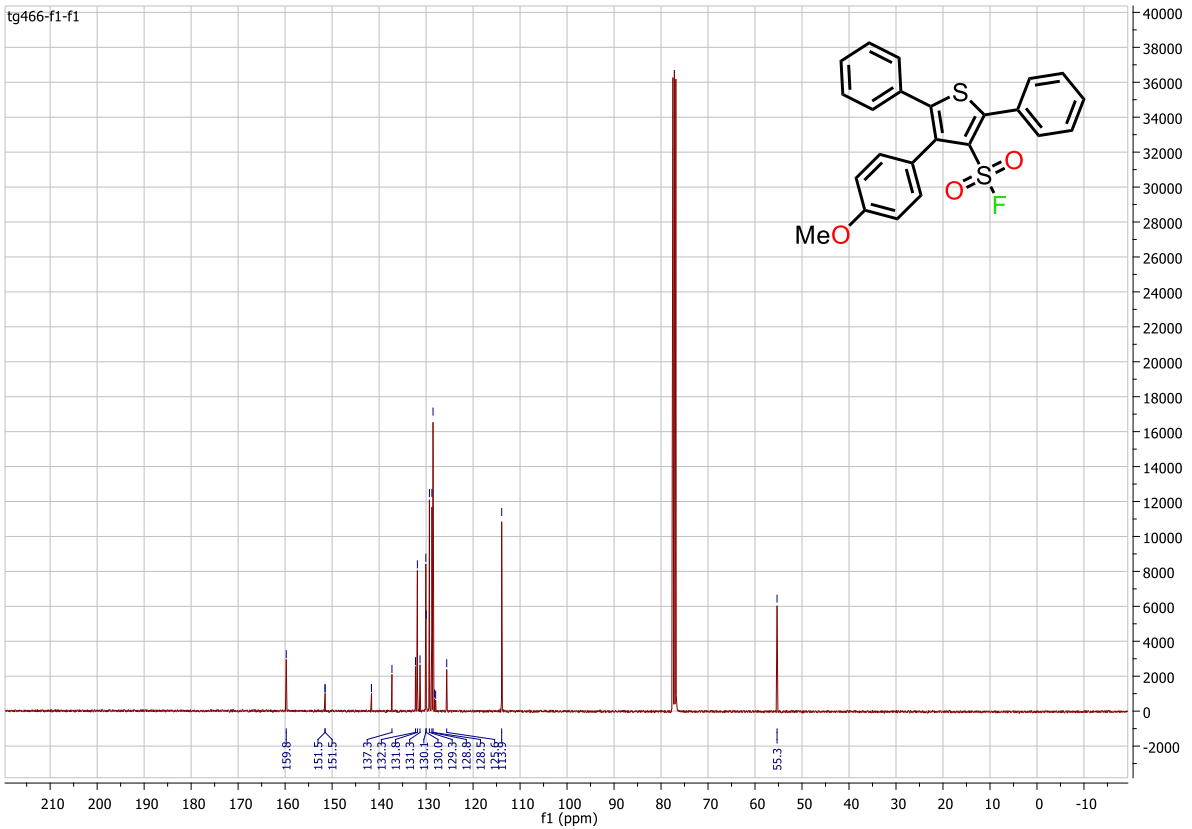

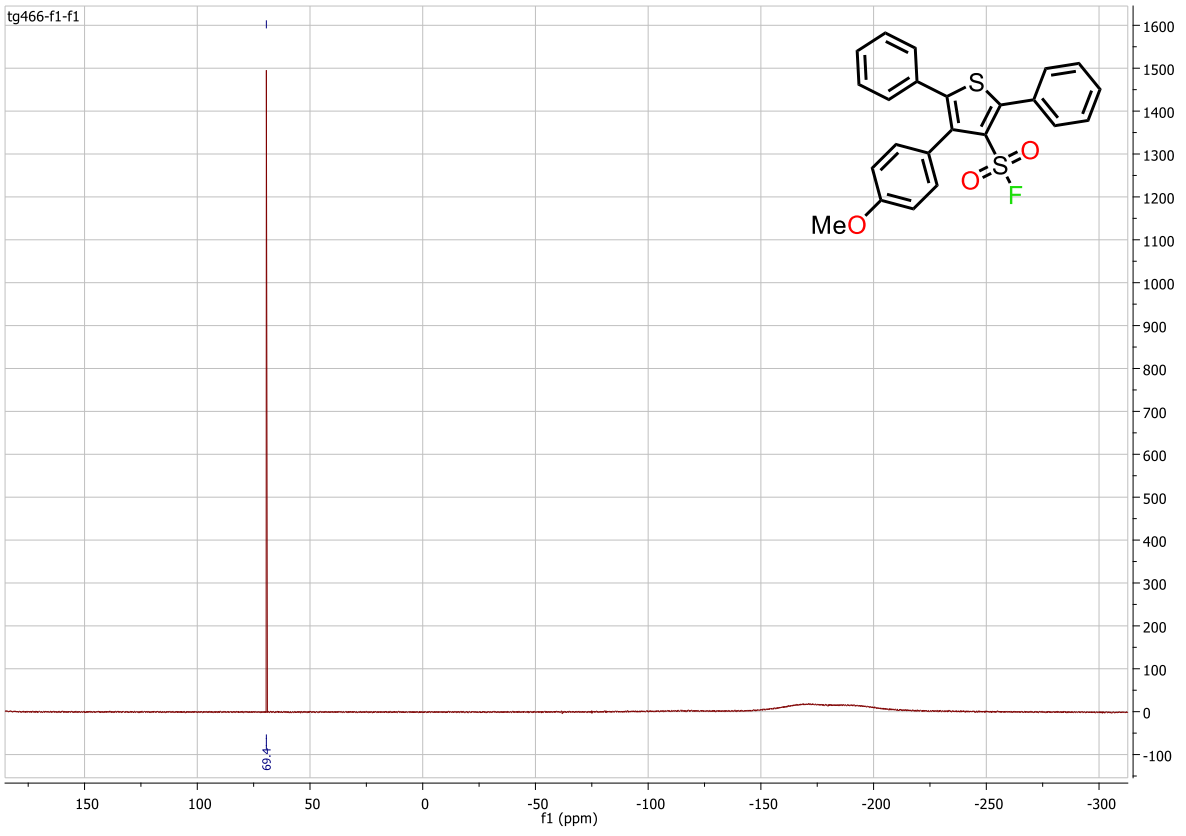

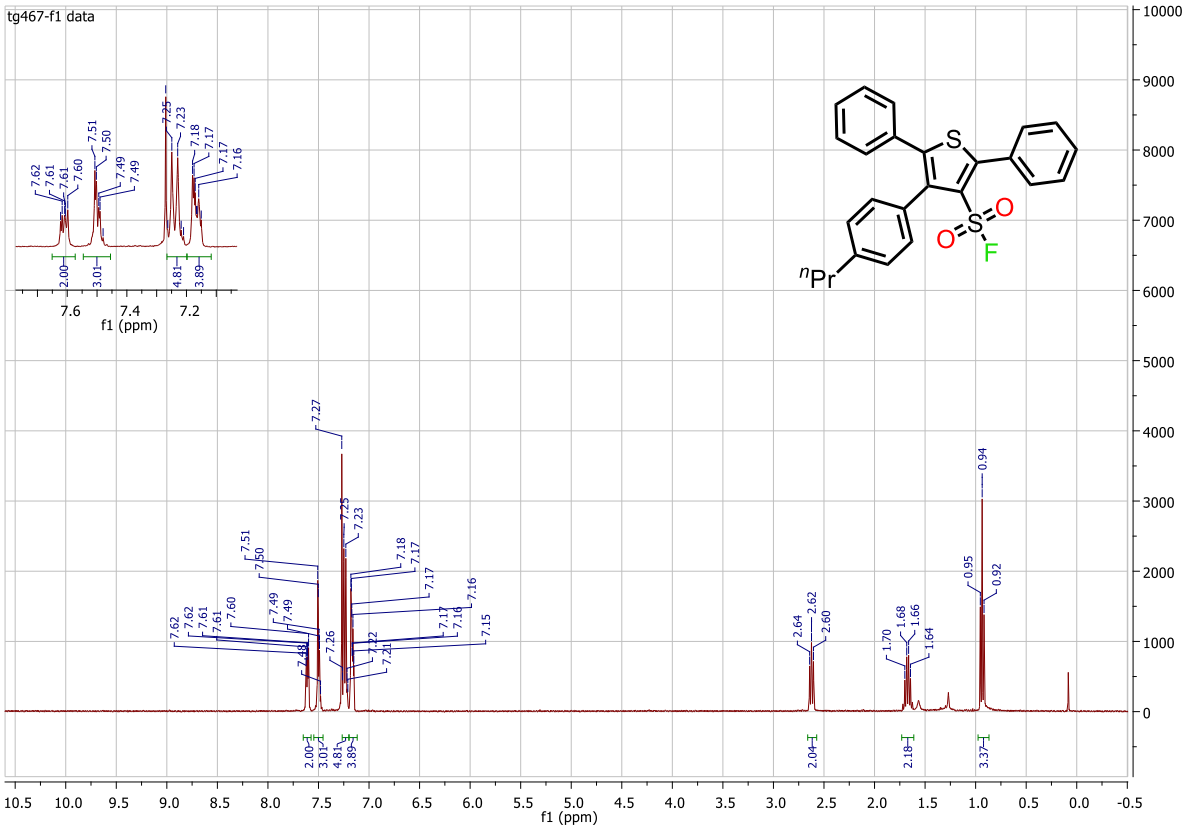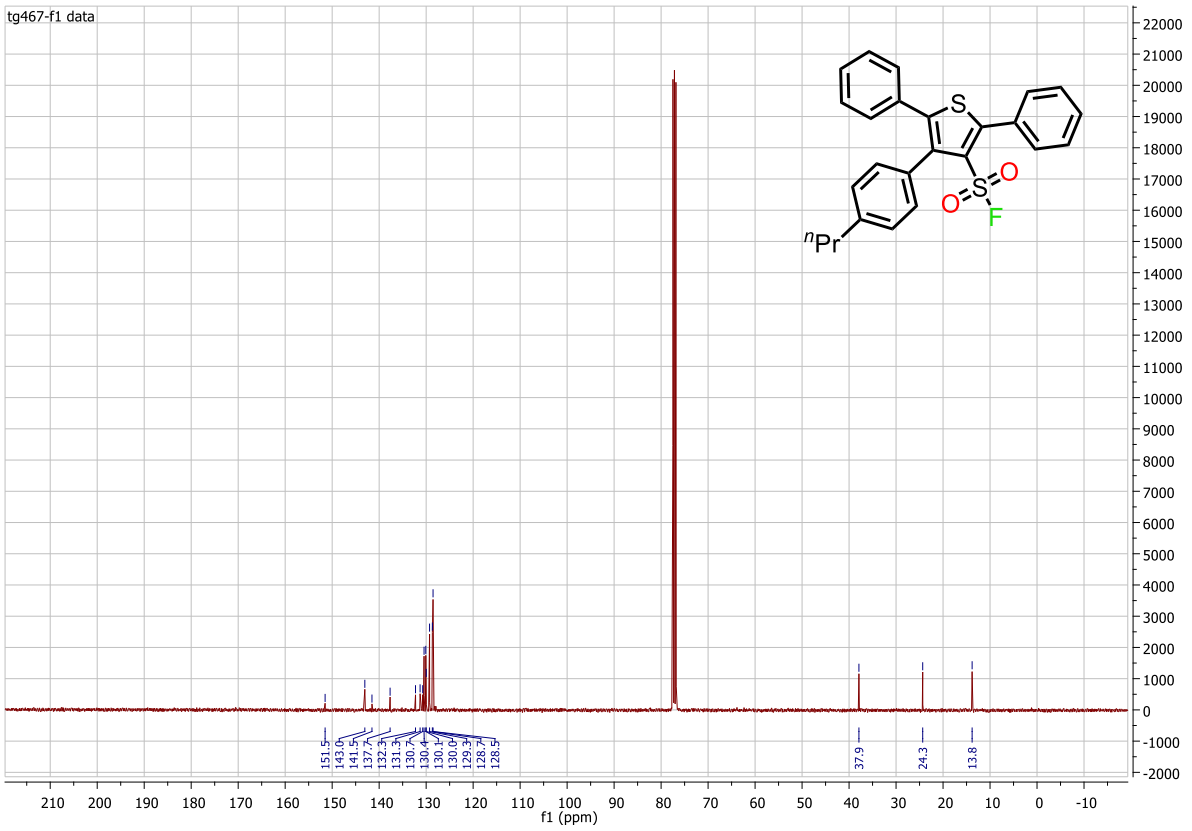



tg467-f1 data

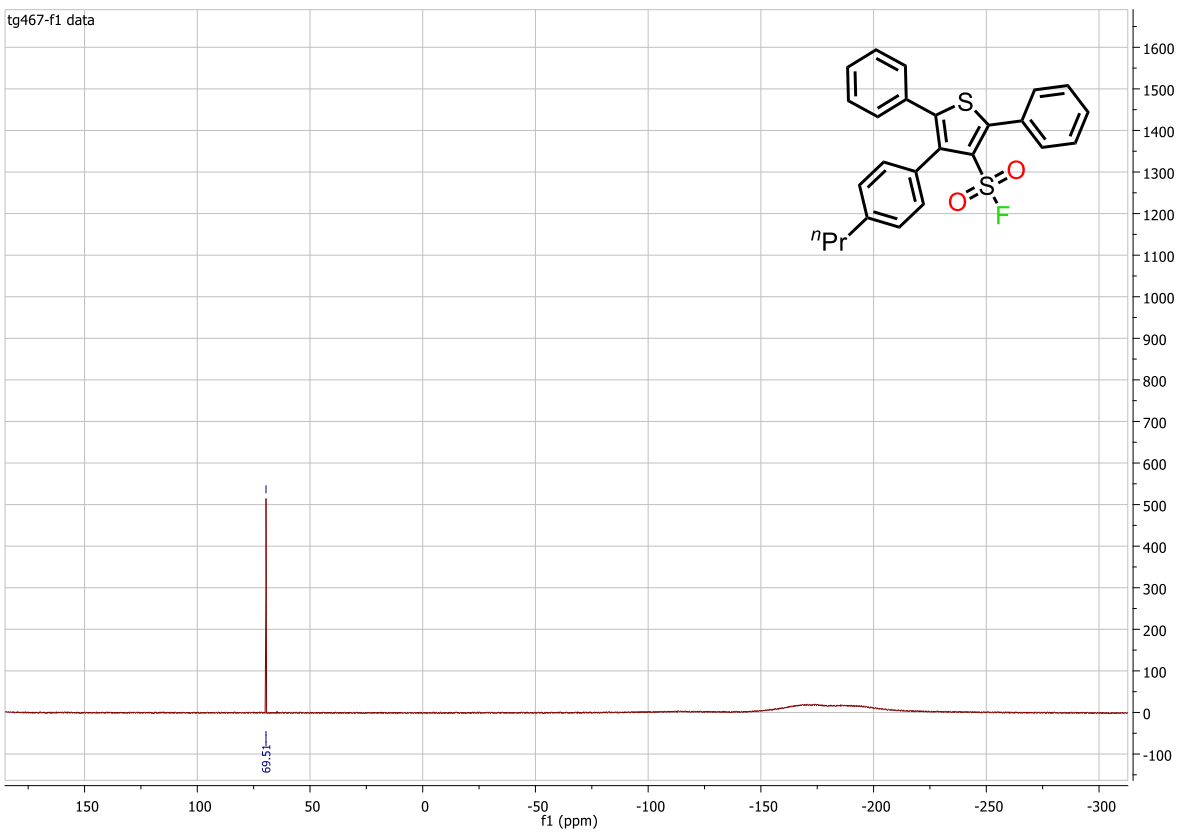

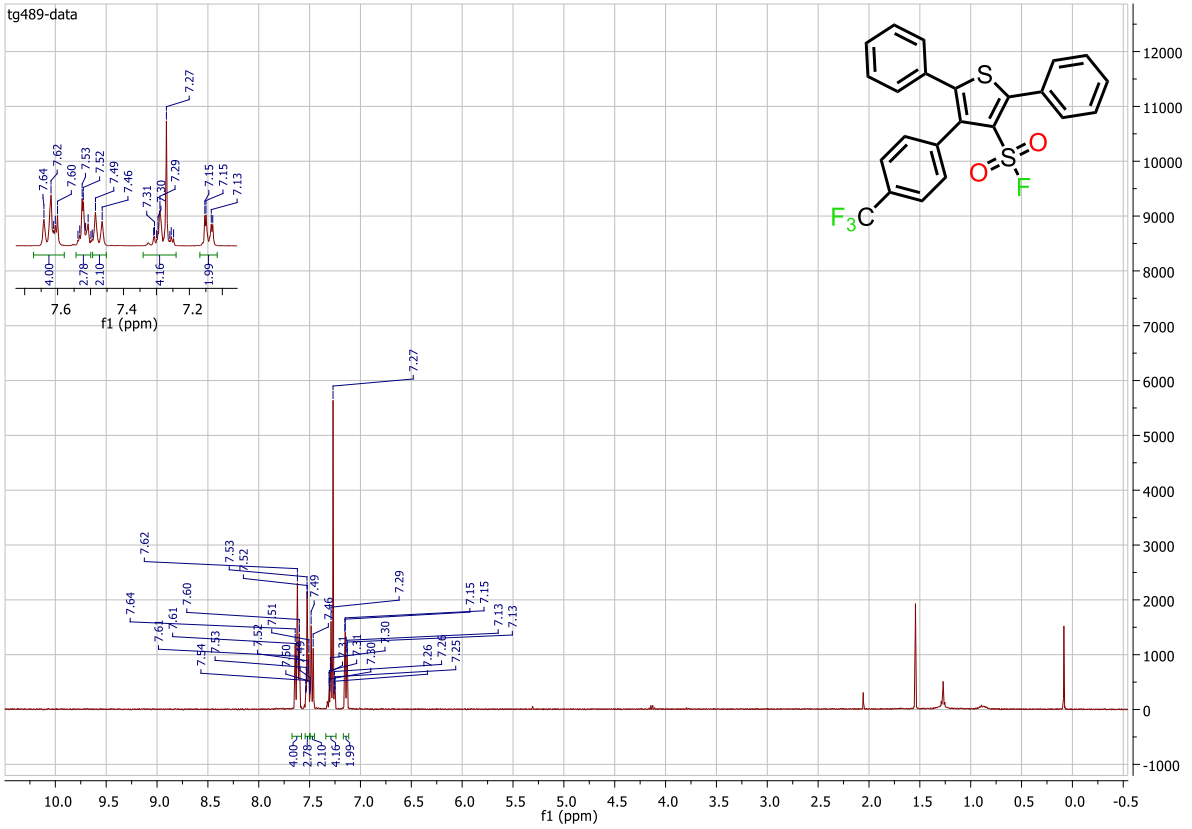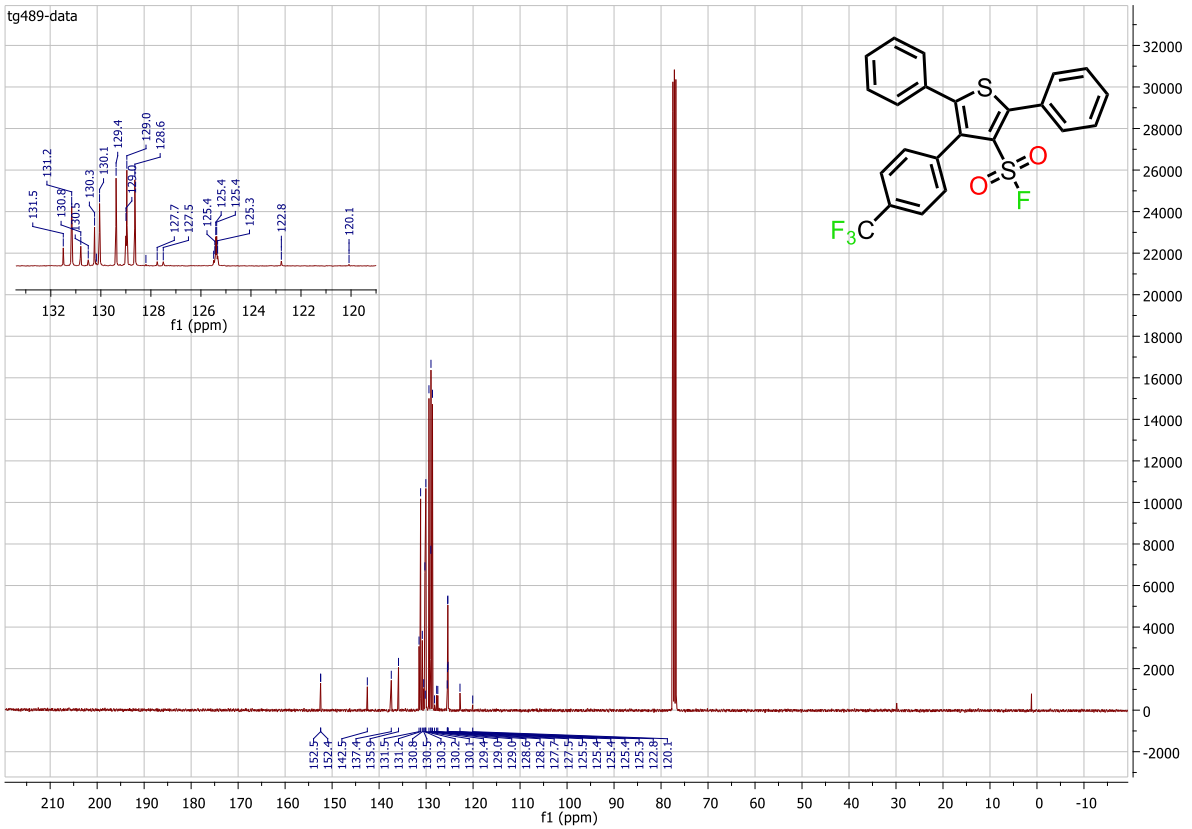

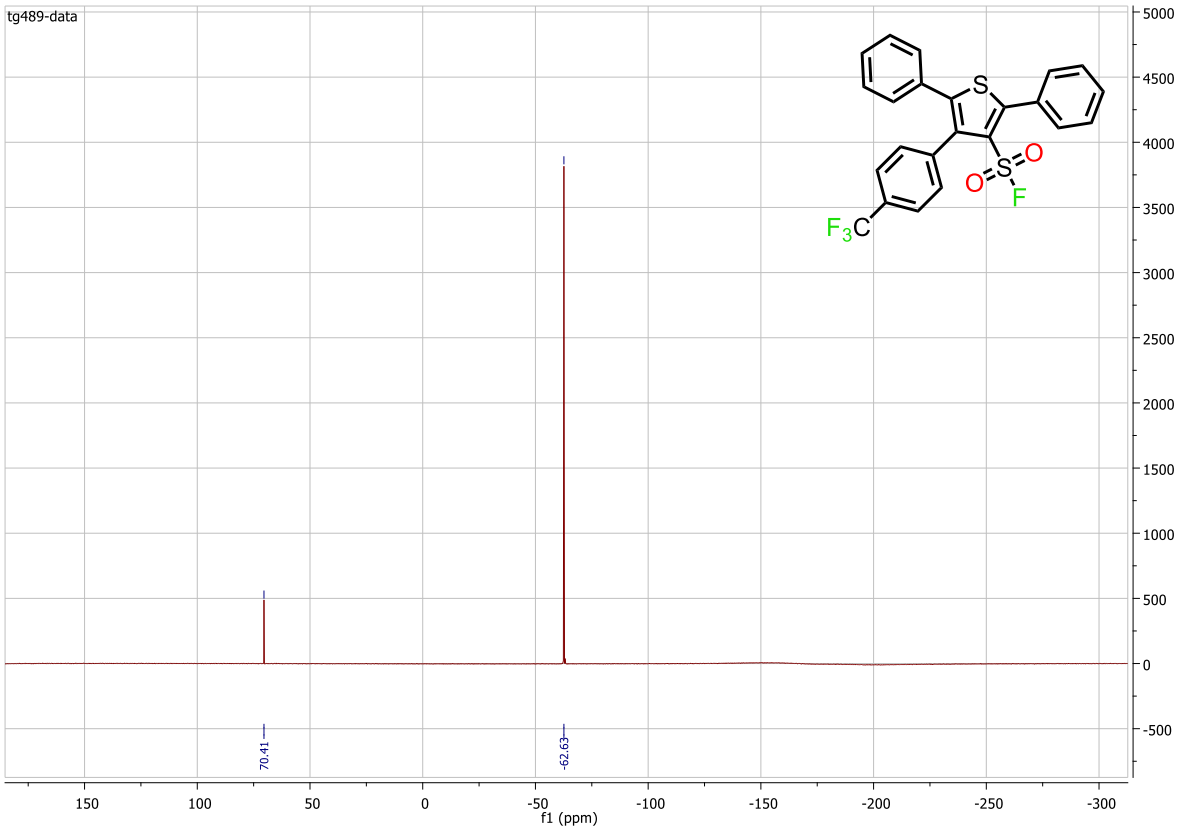

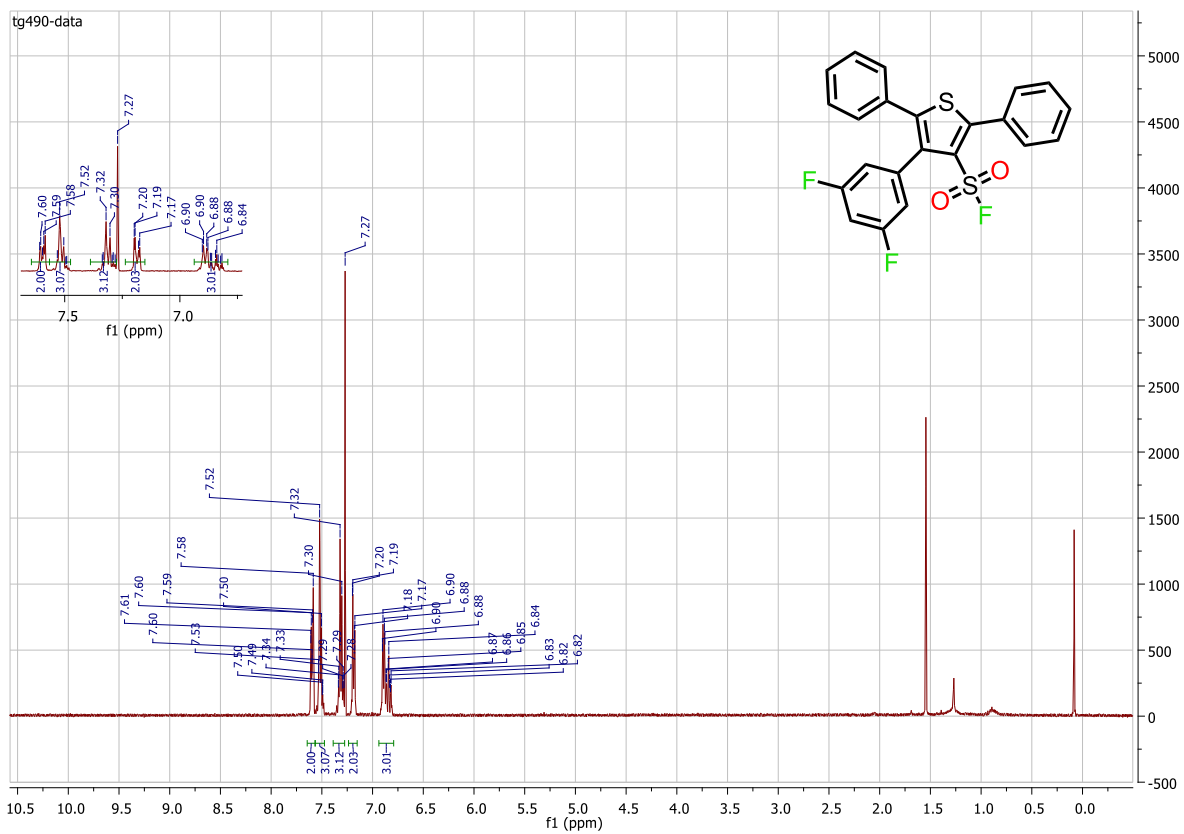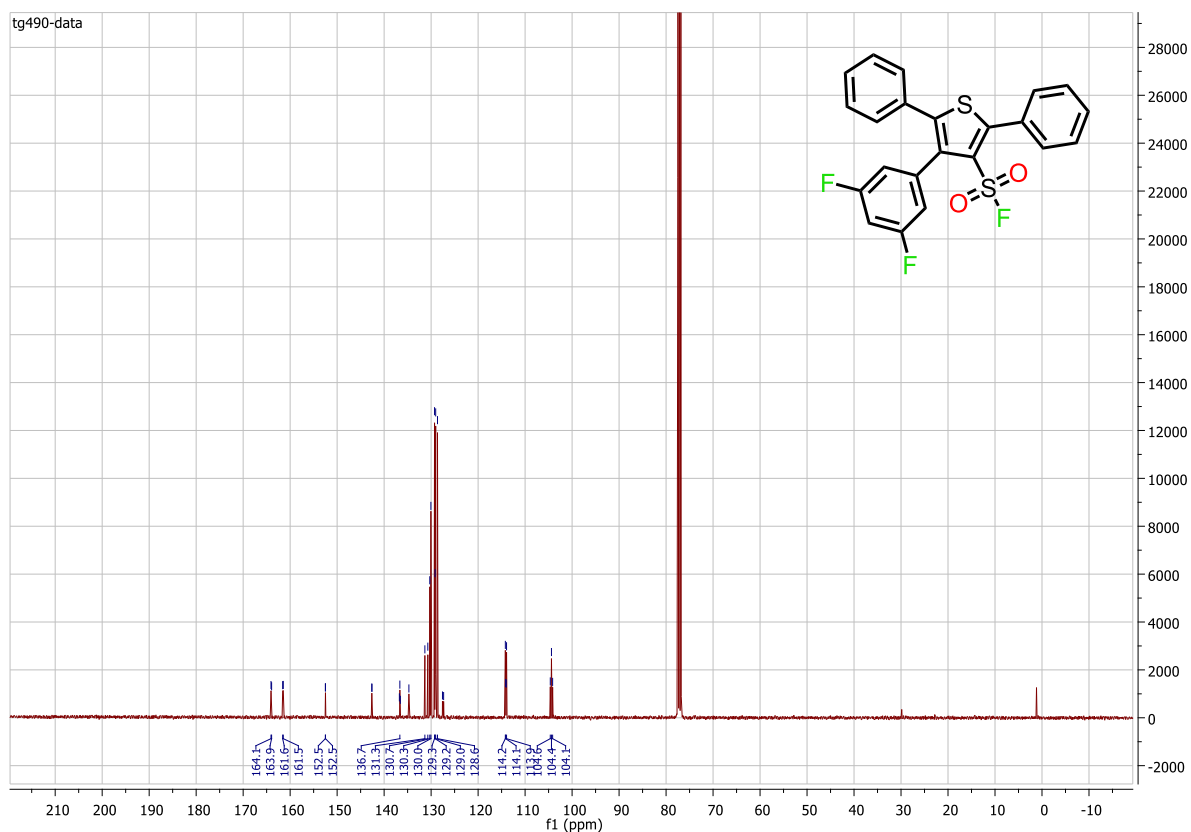

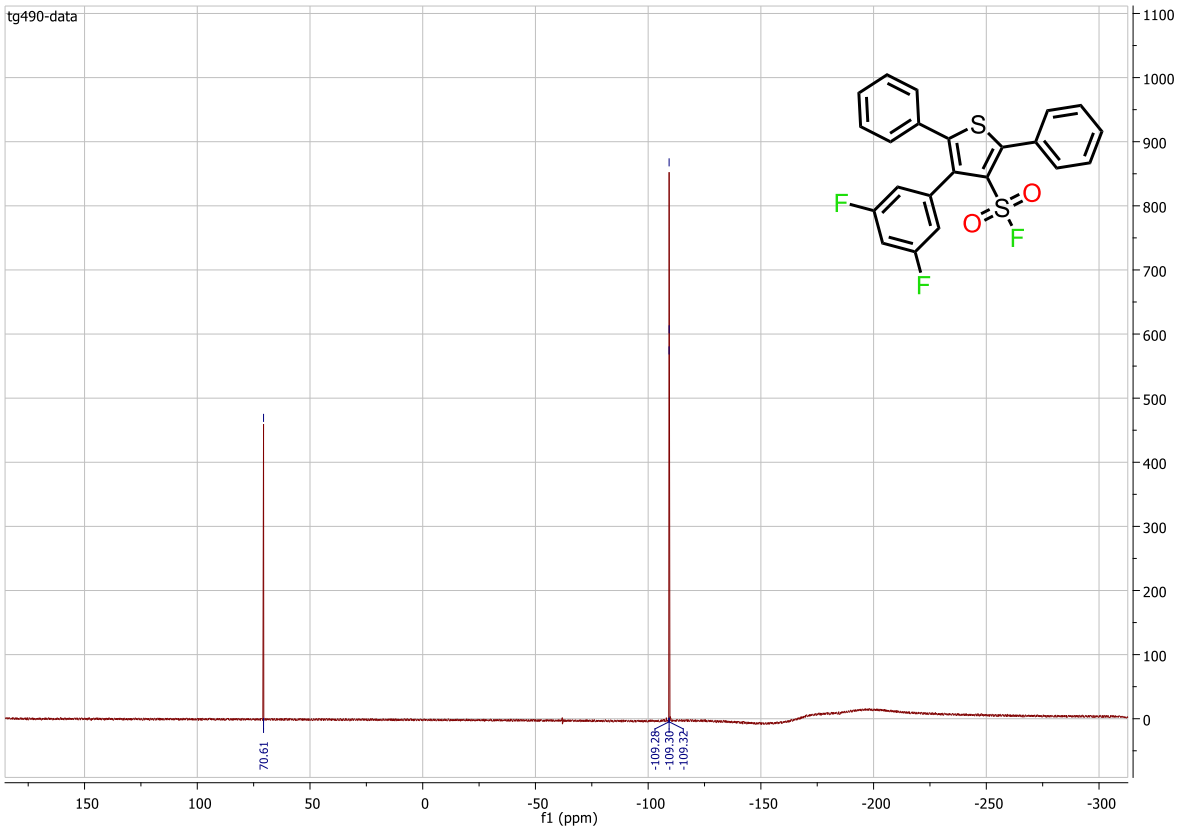

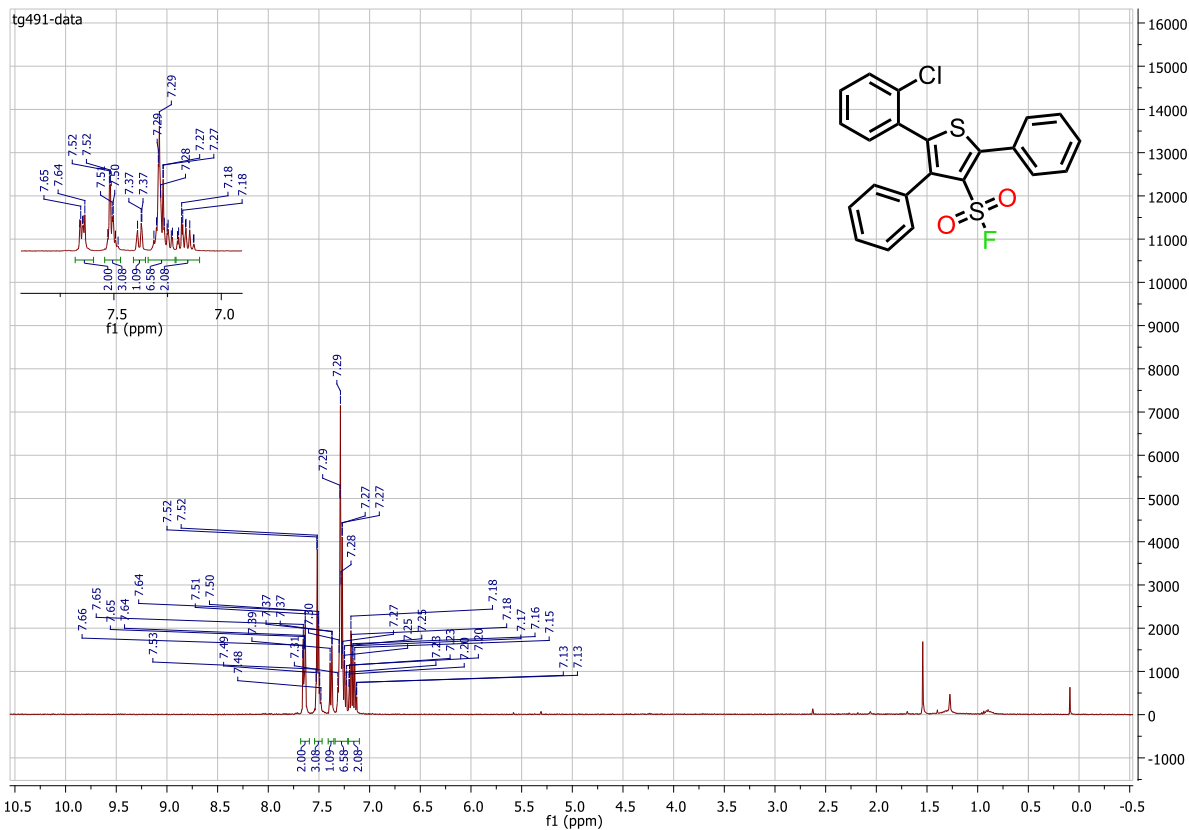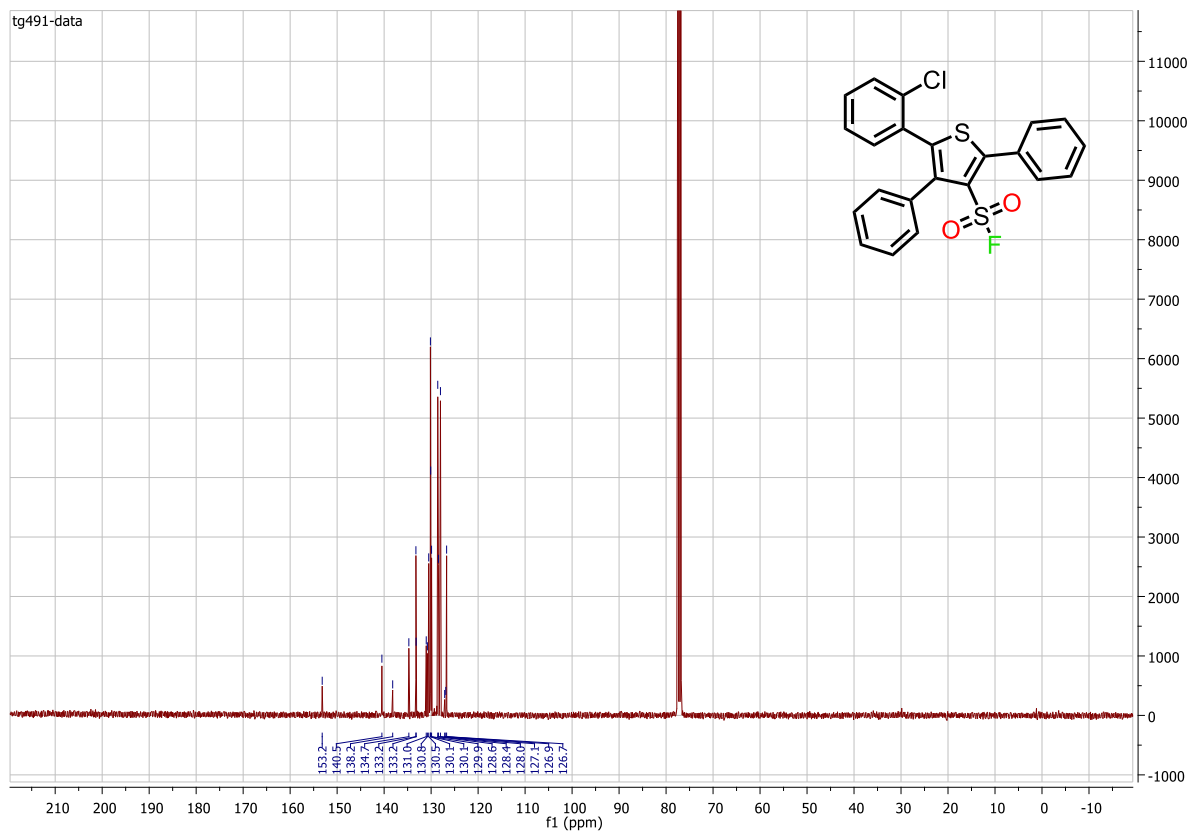

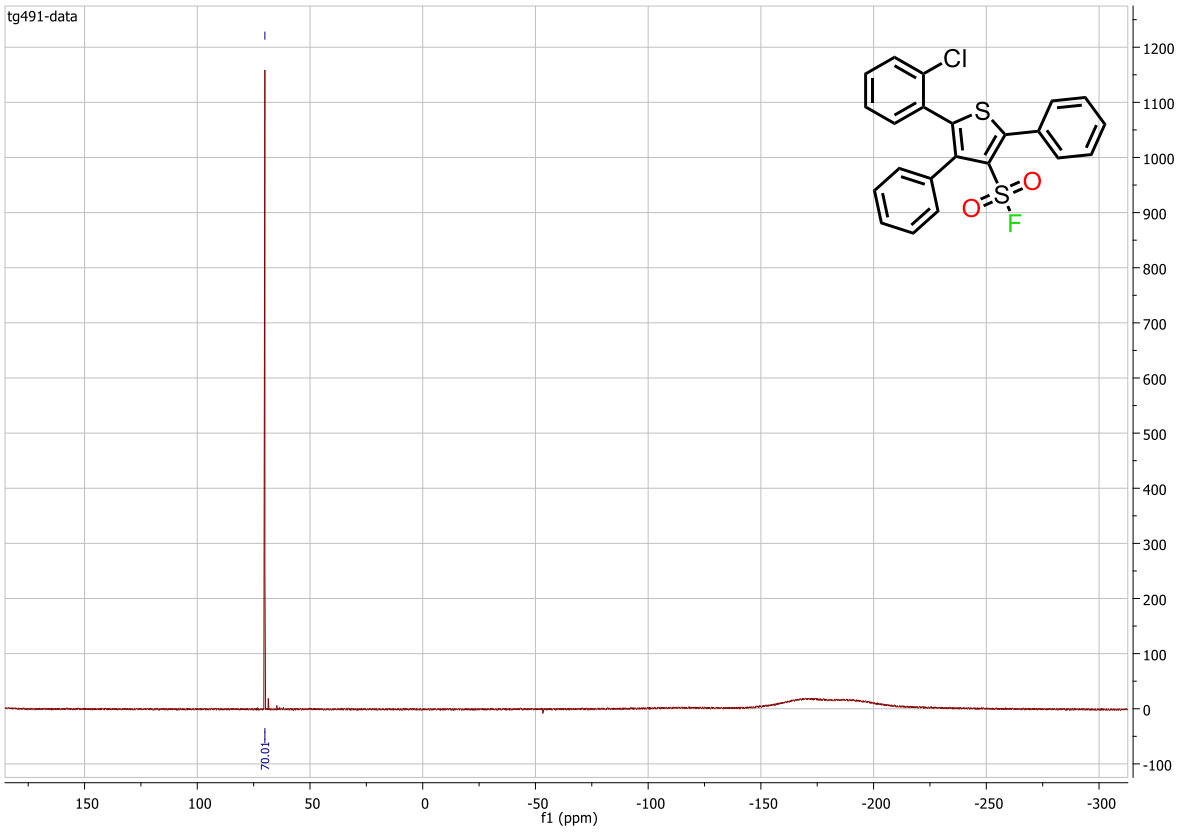

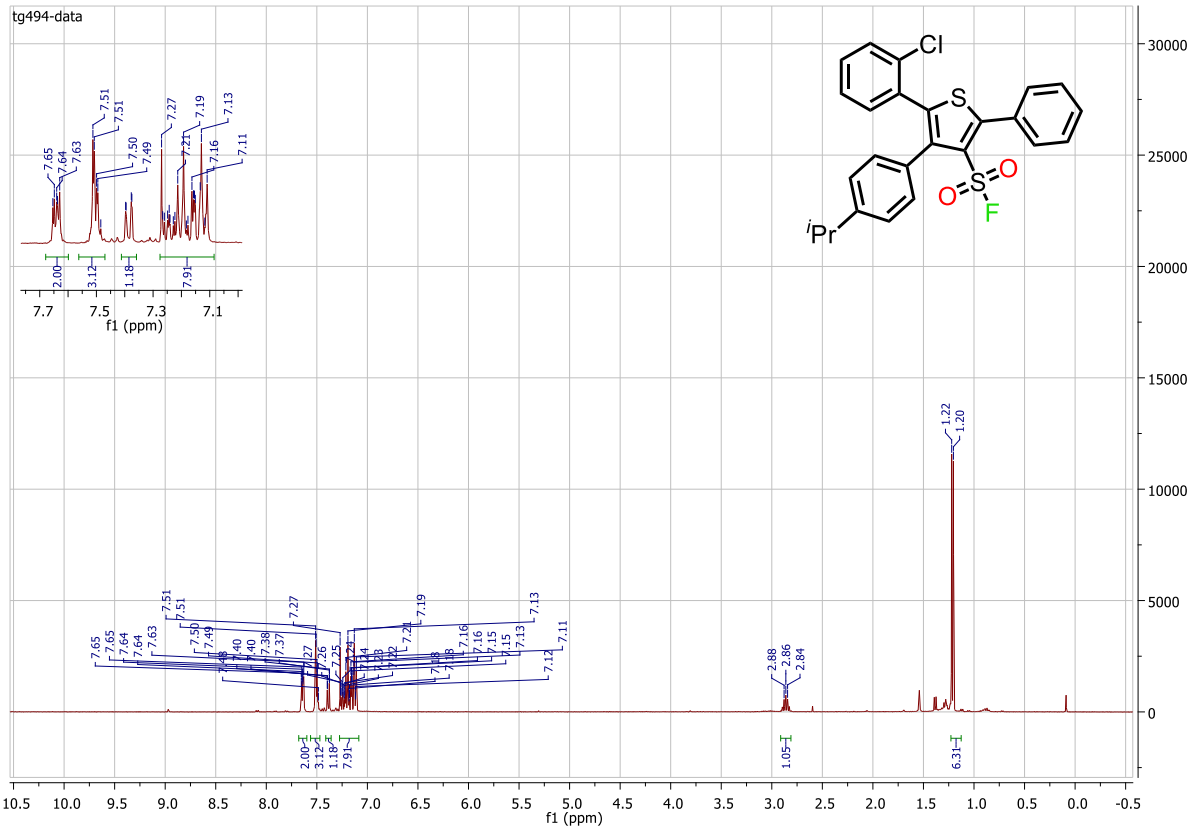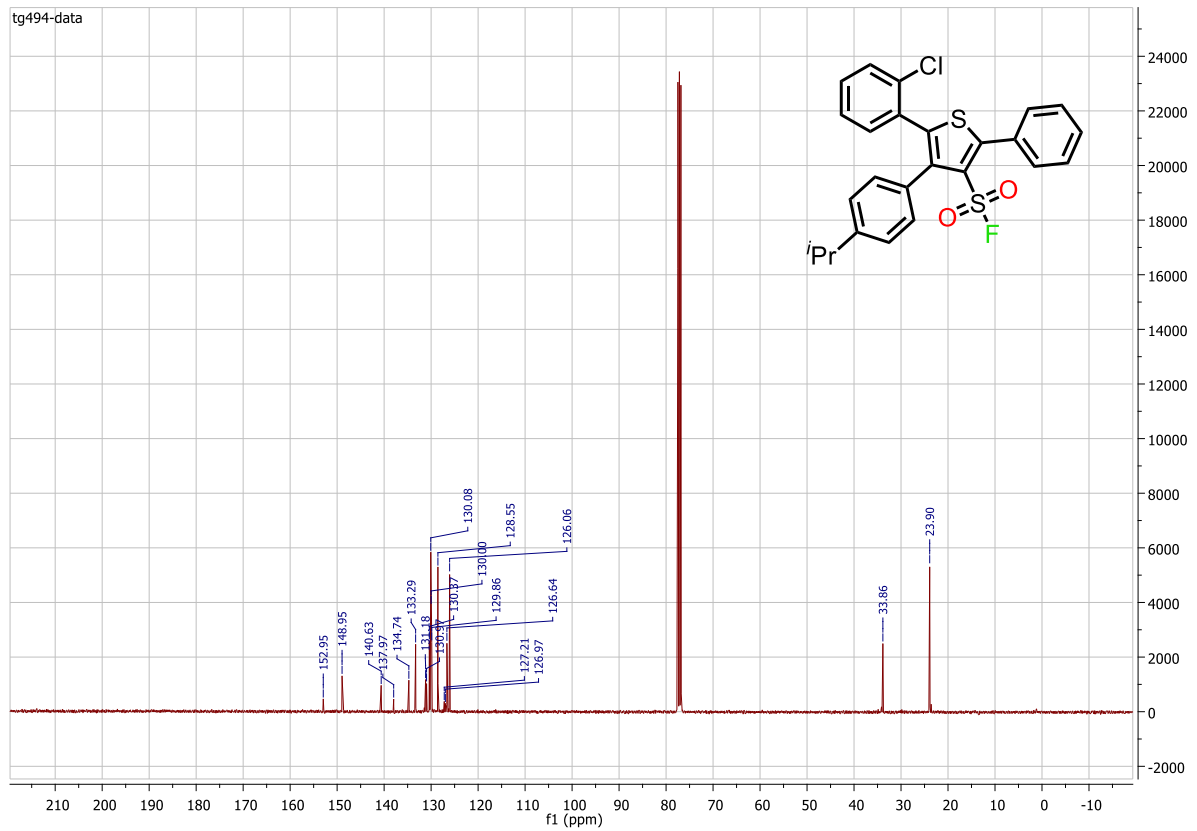



tg494-data

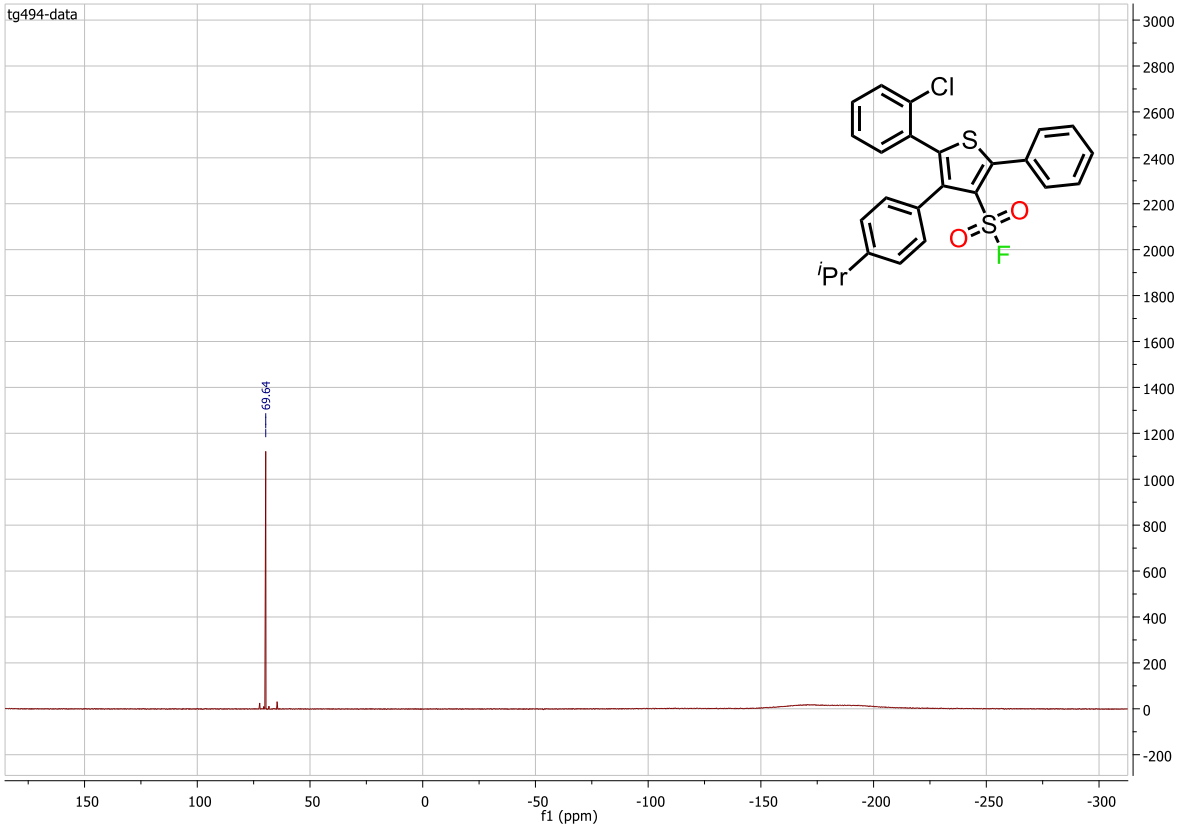

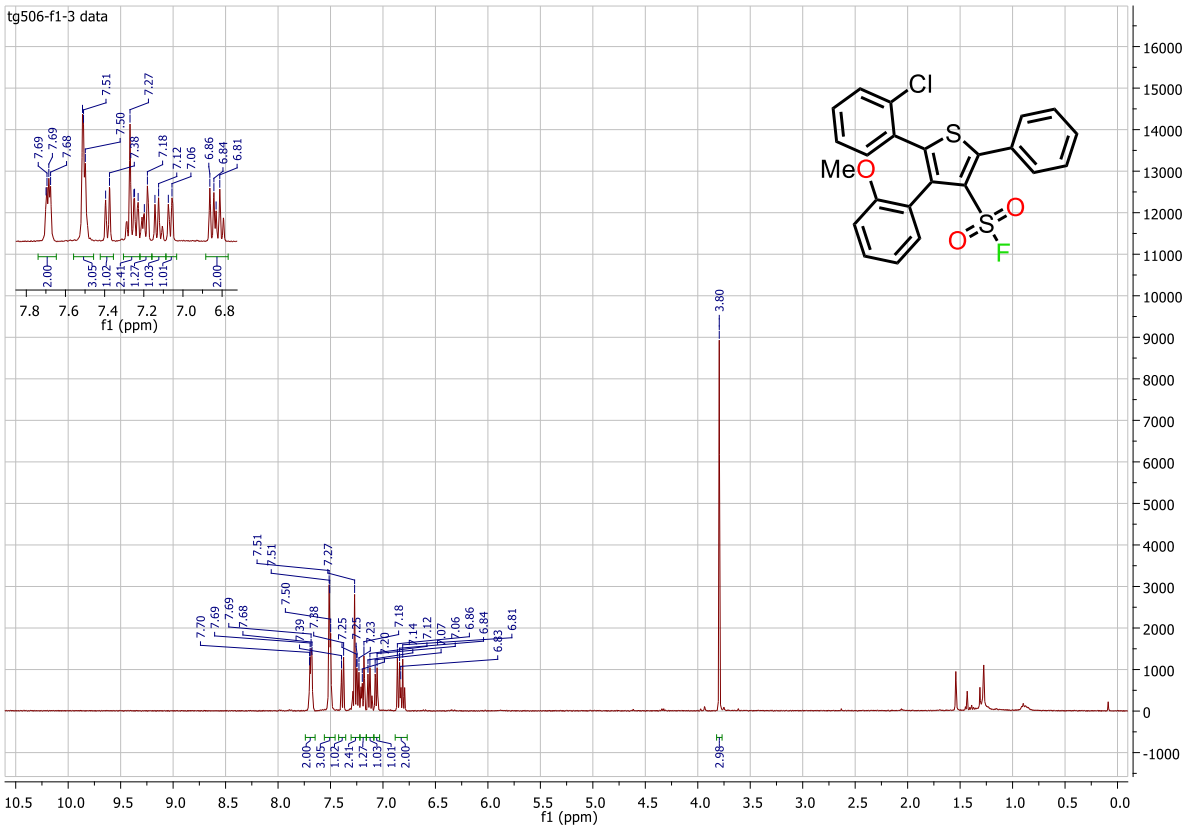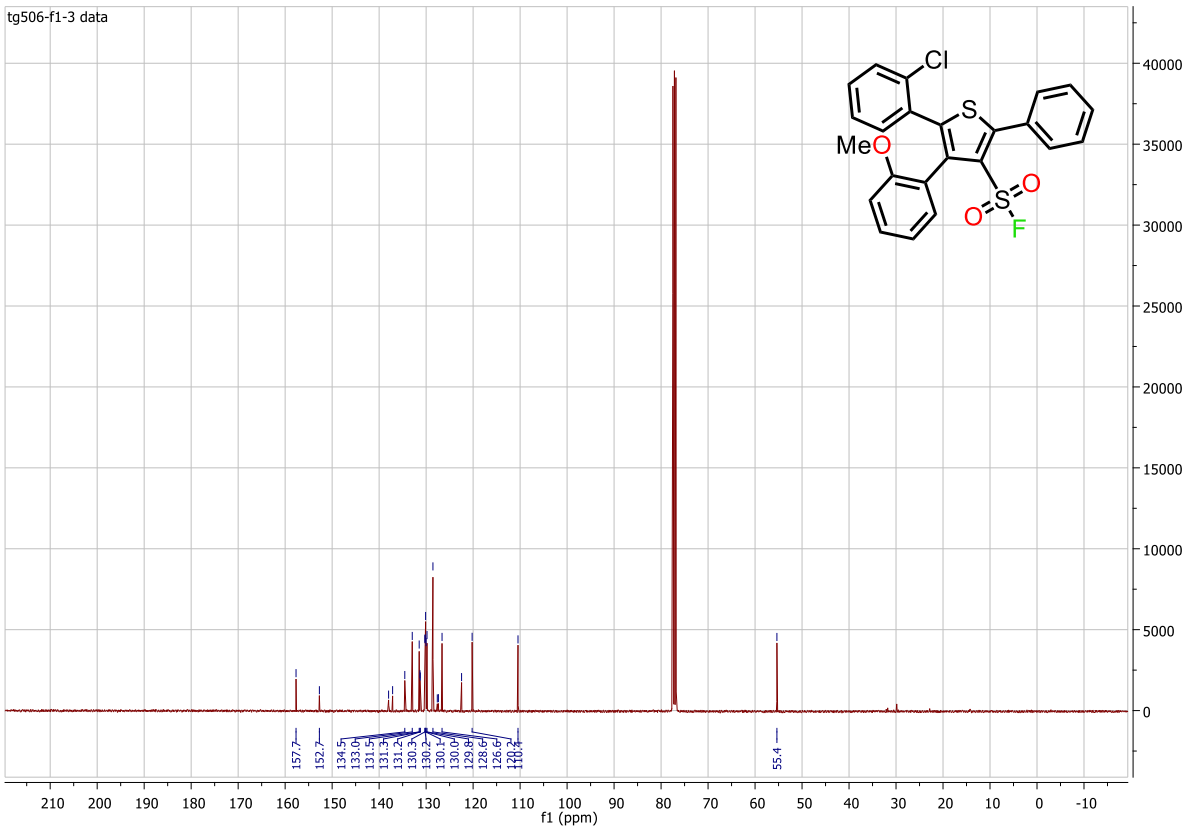

tg506-f1-3 data

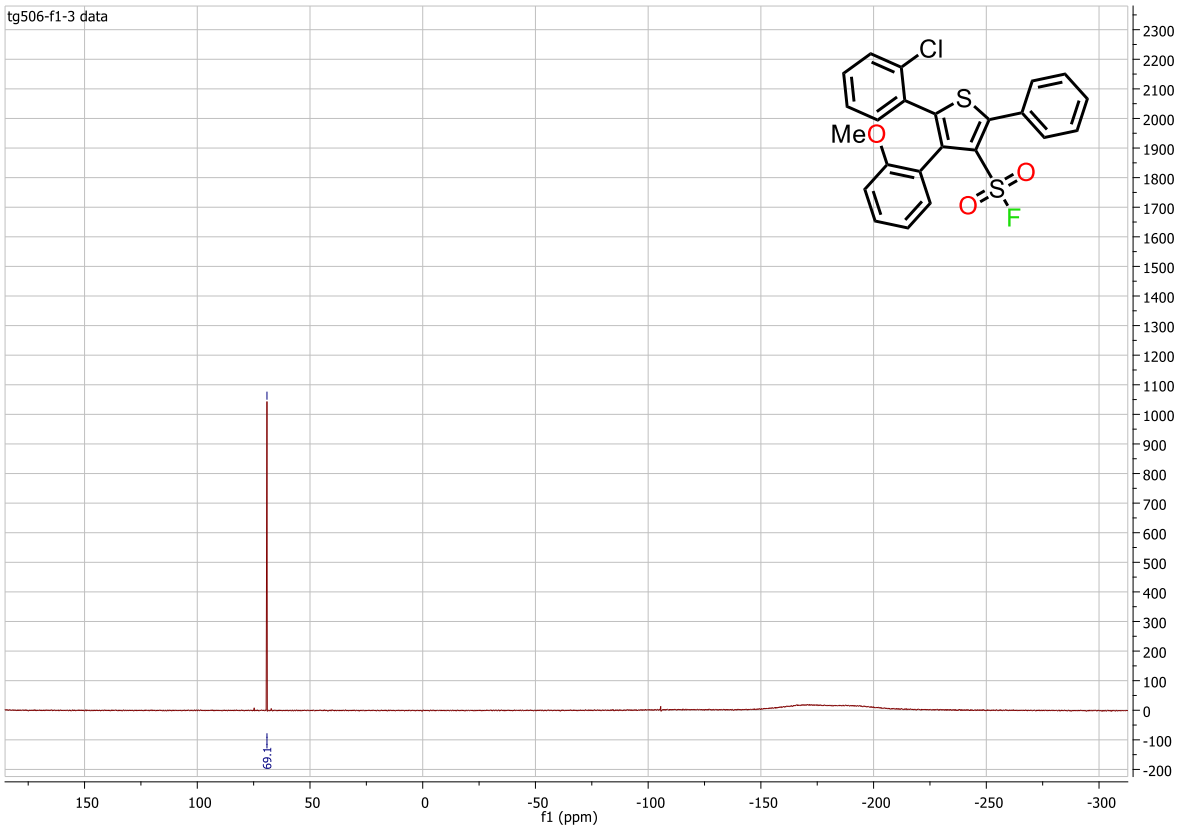

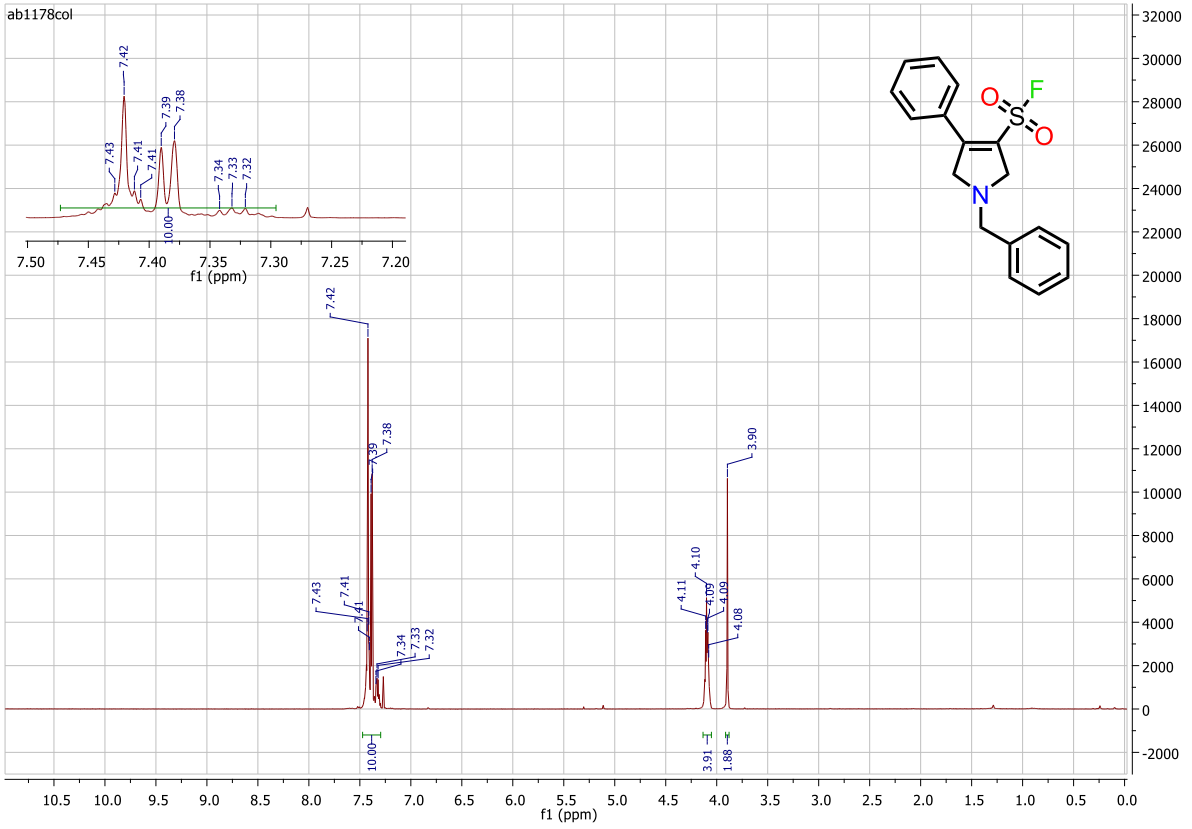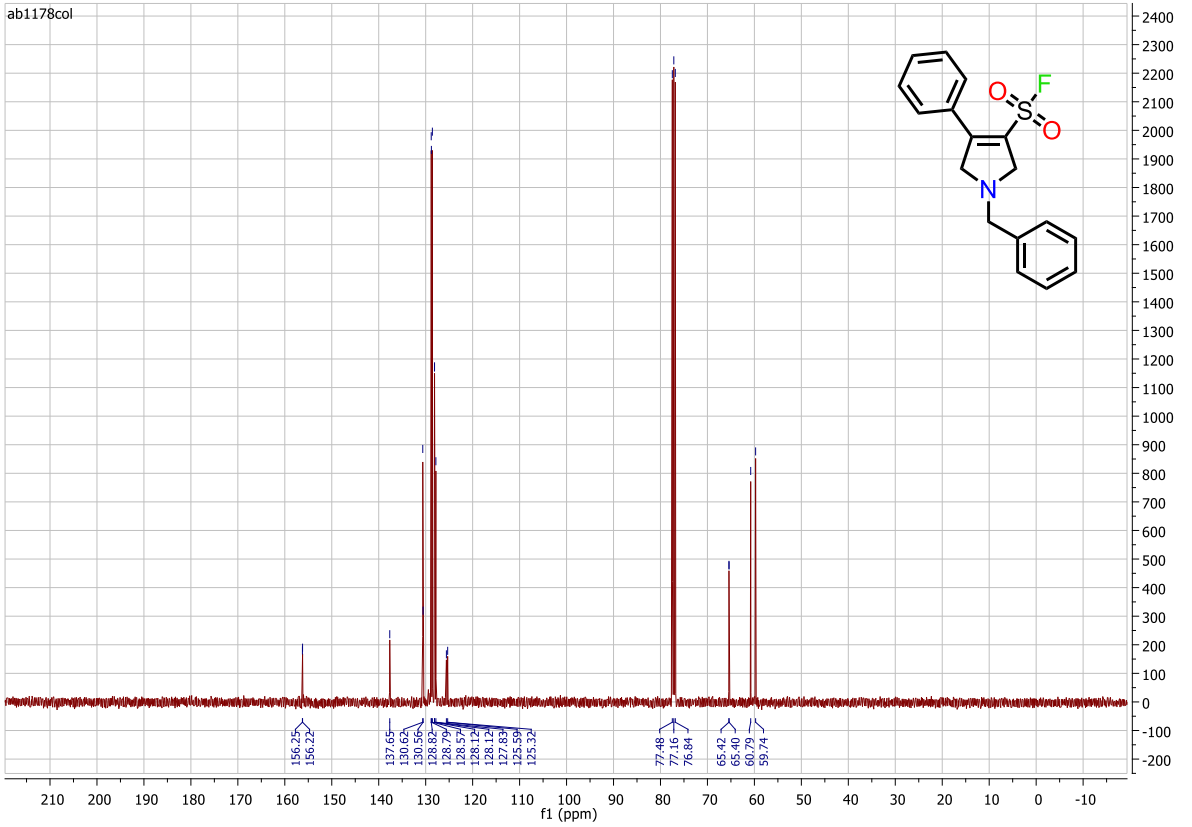

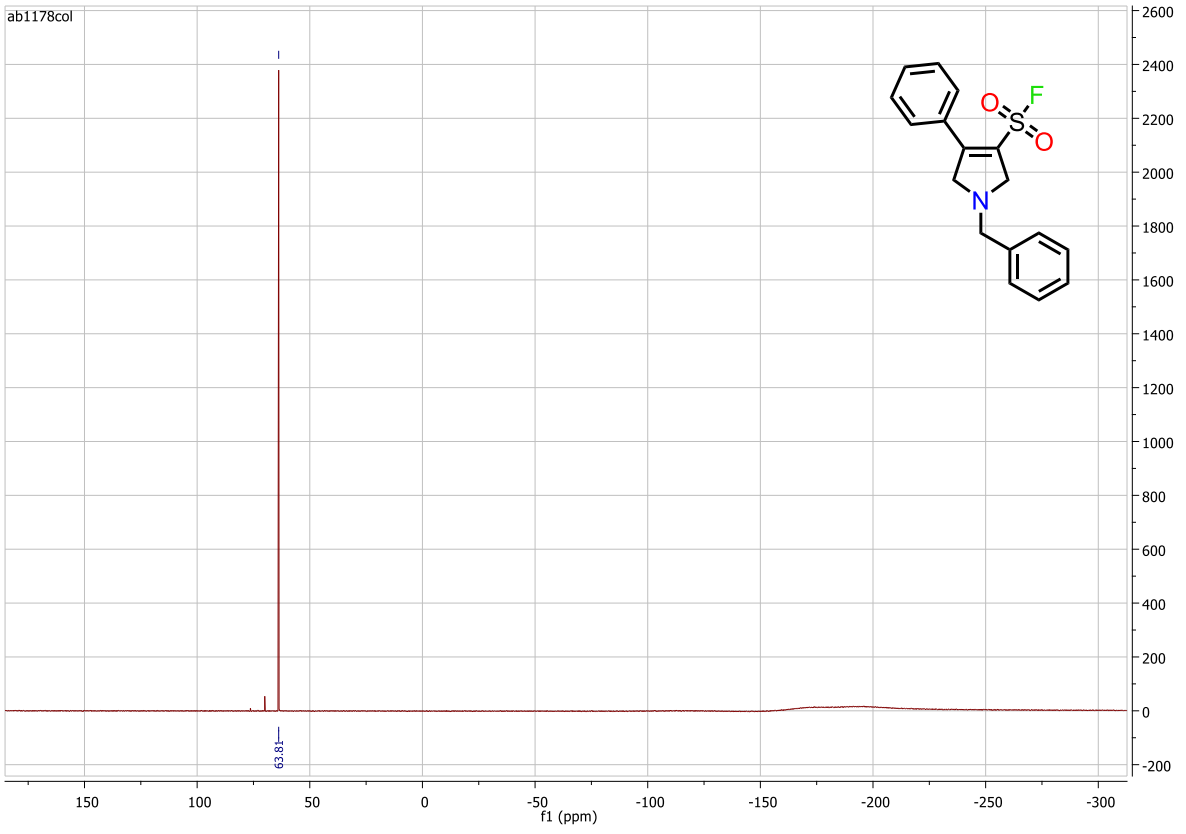

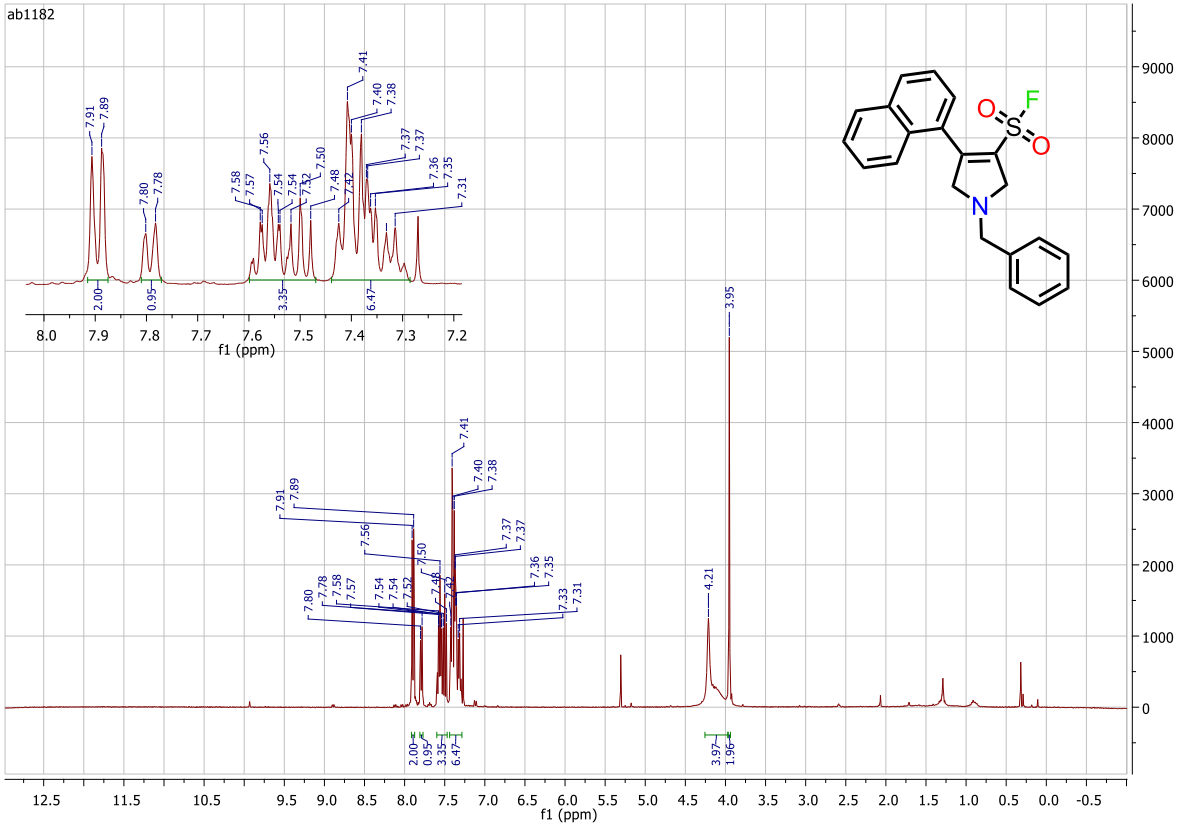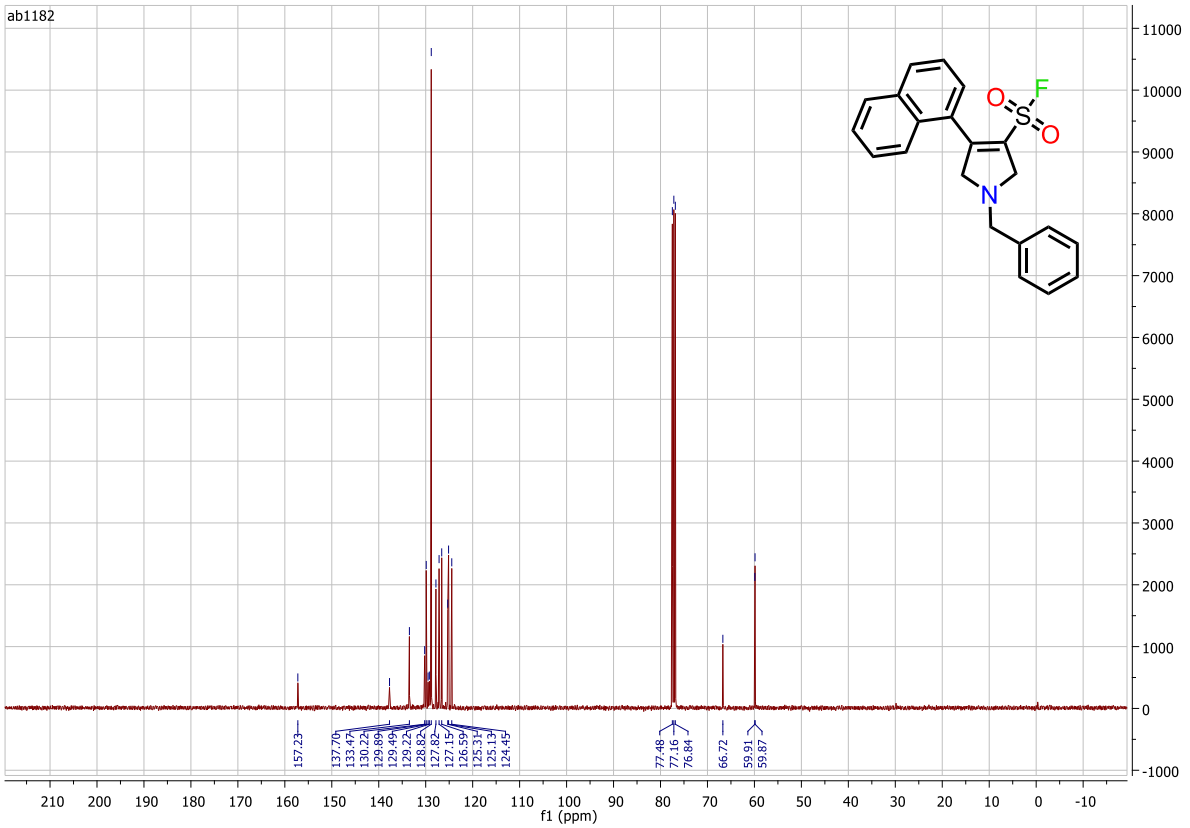

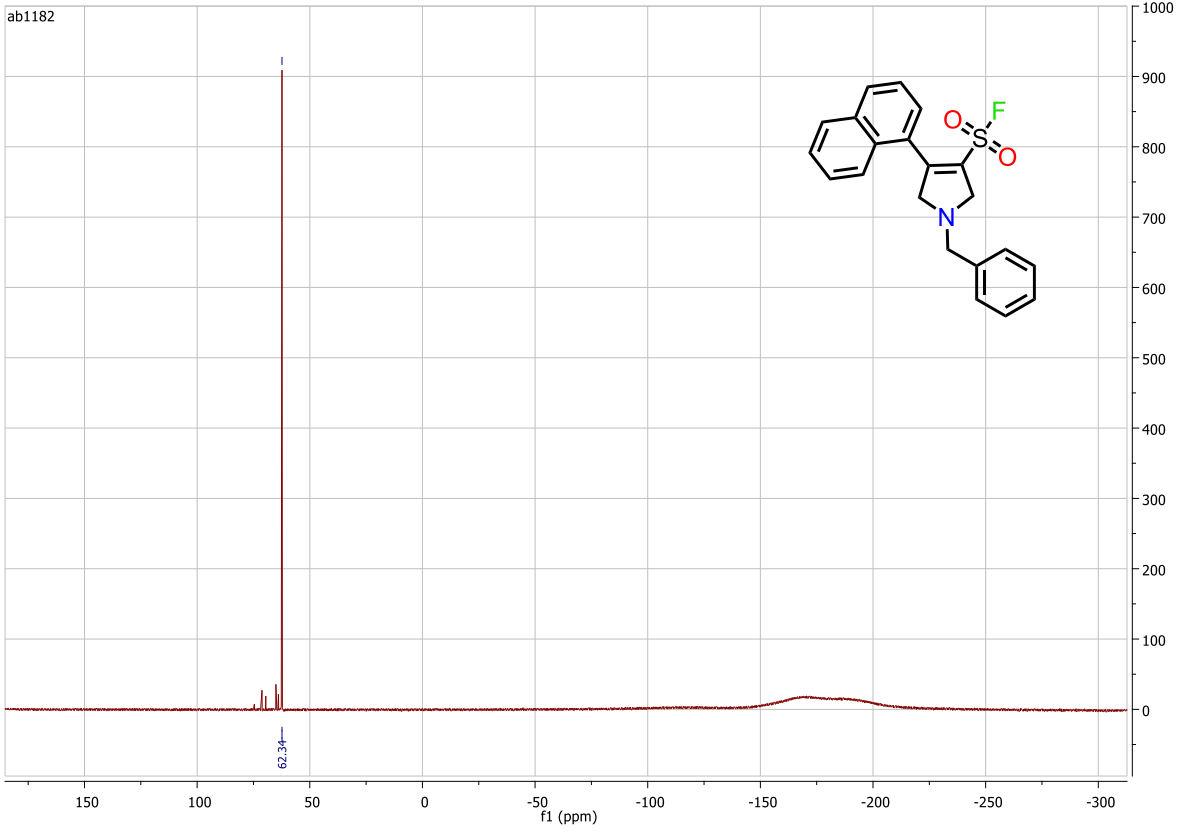





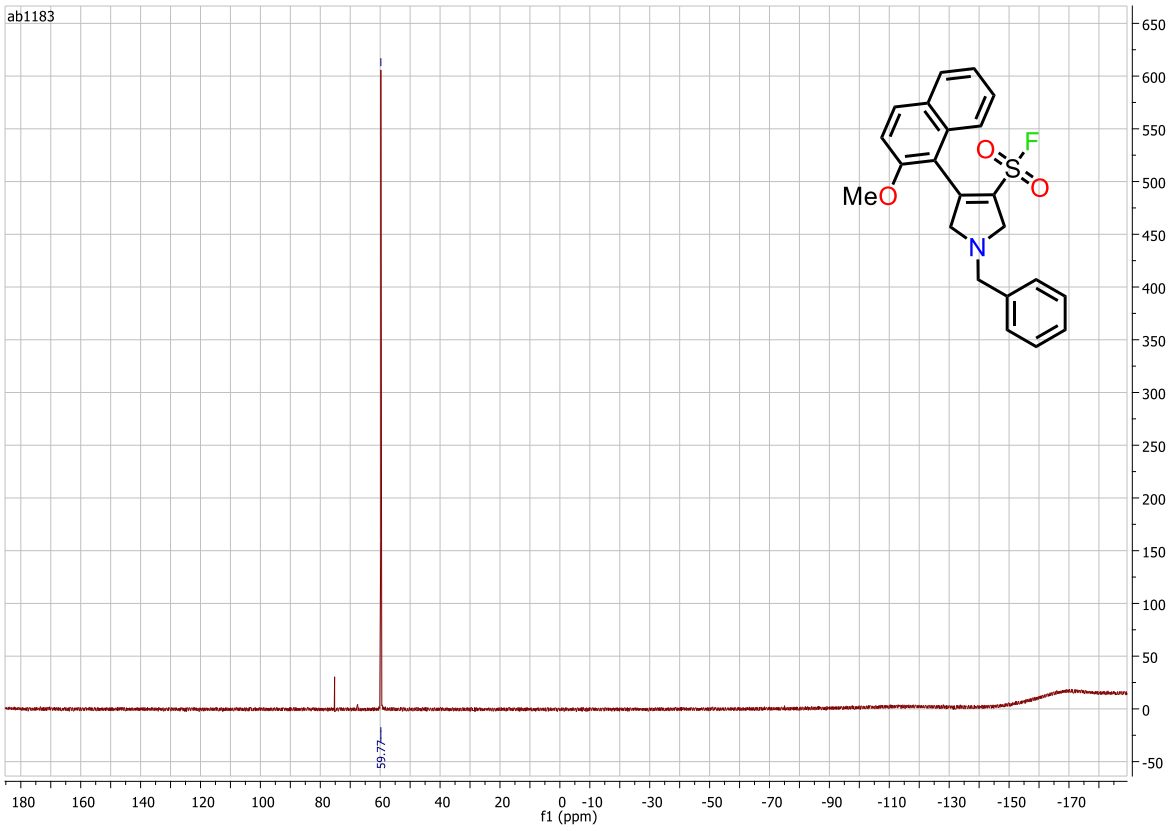

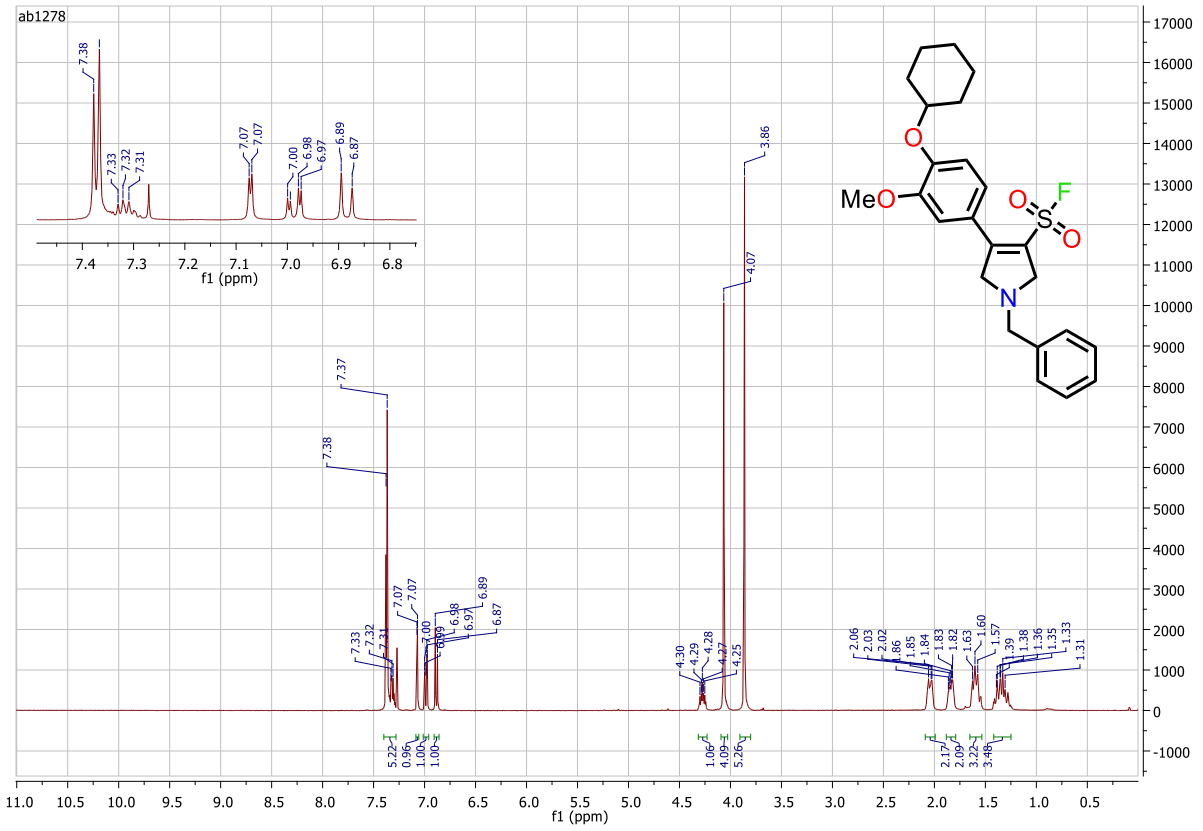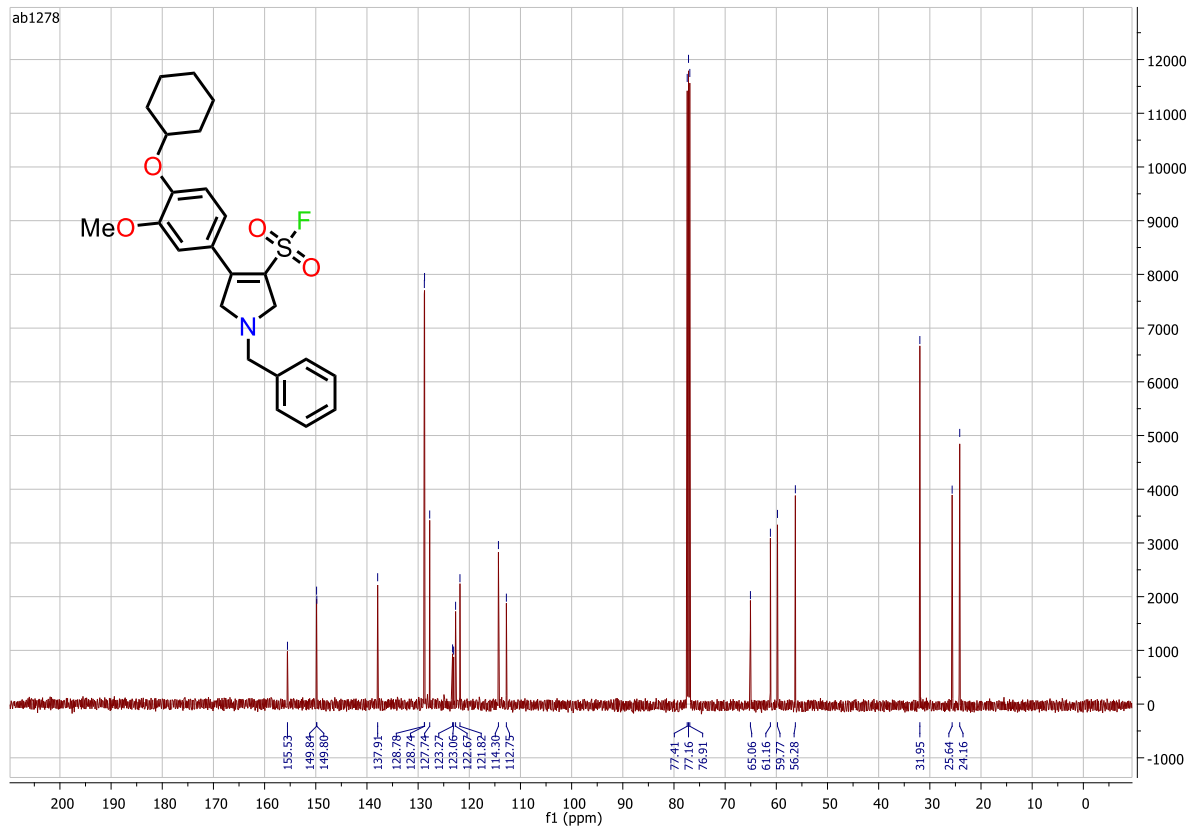

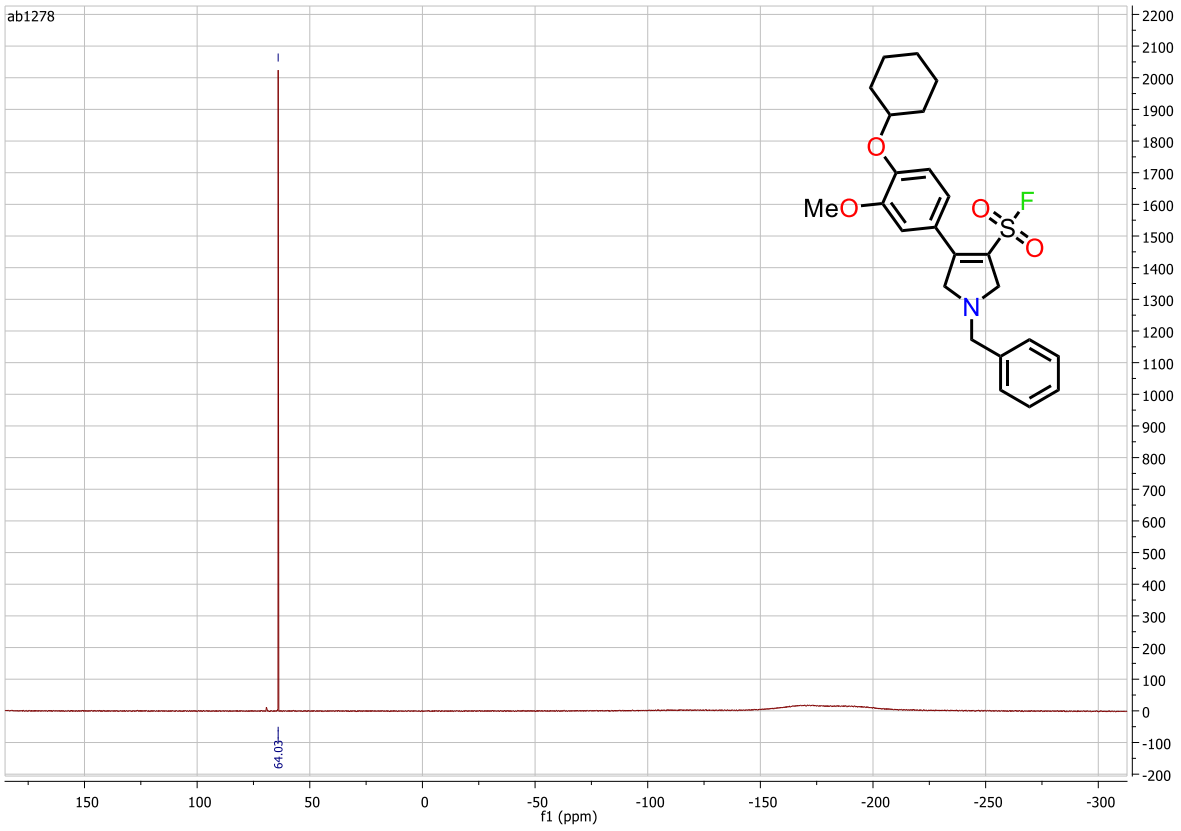

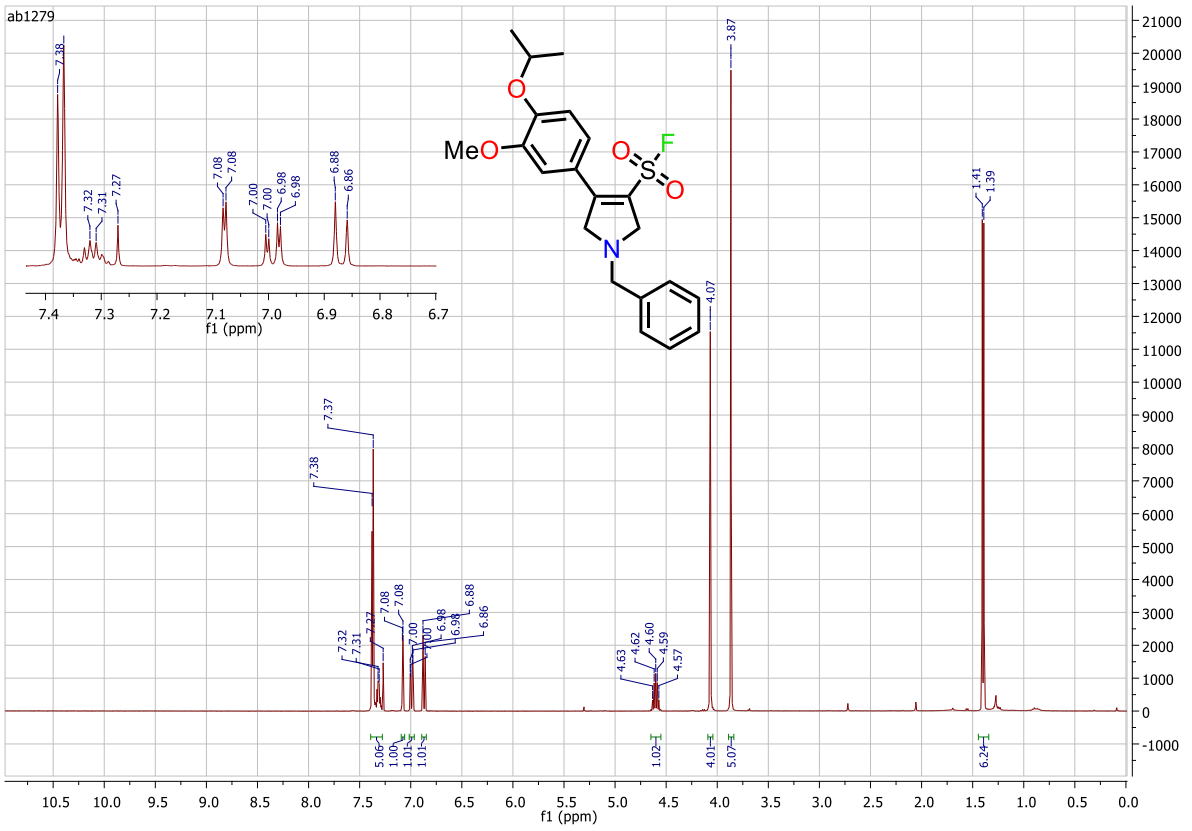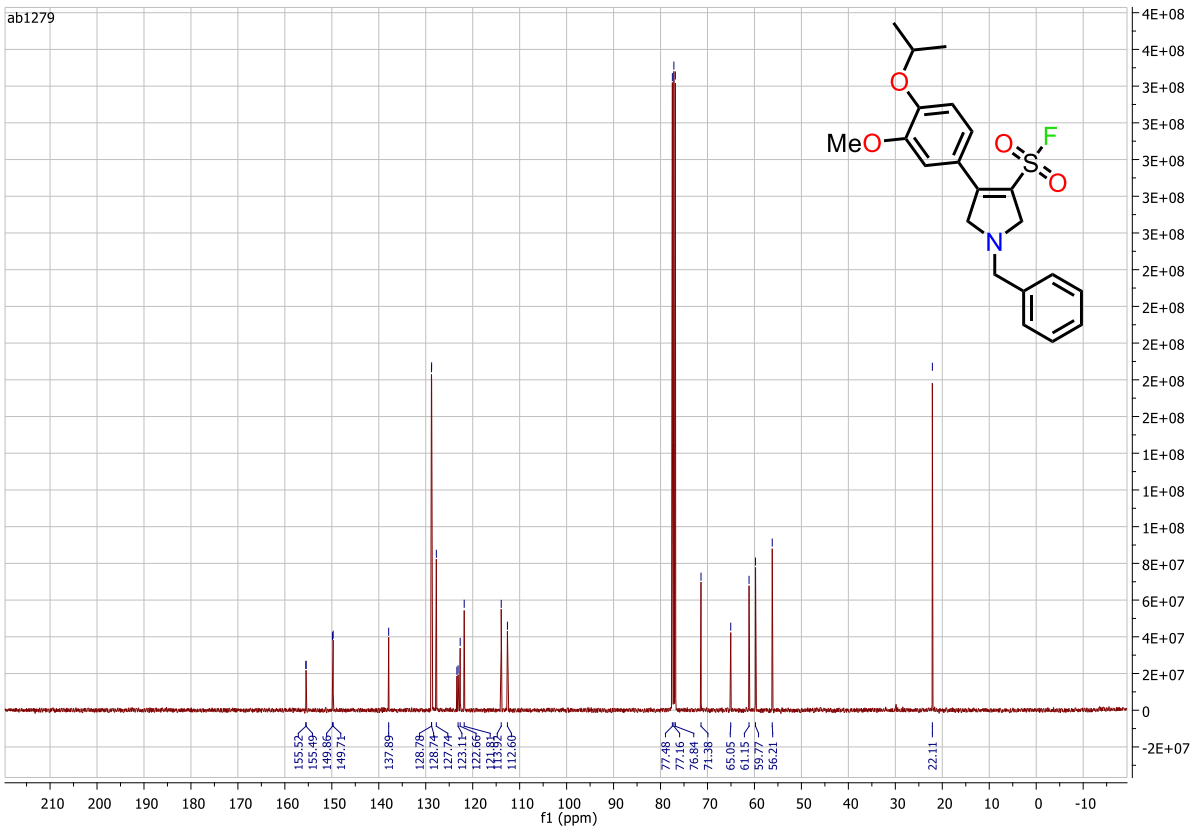

ab1279

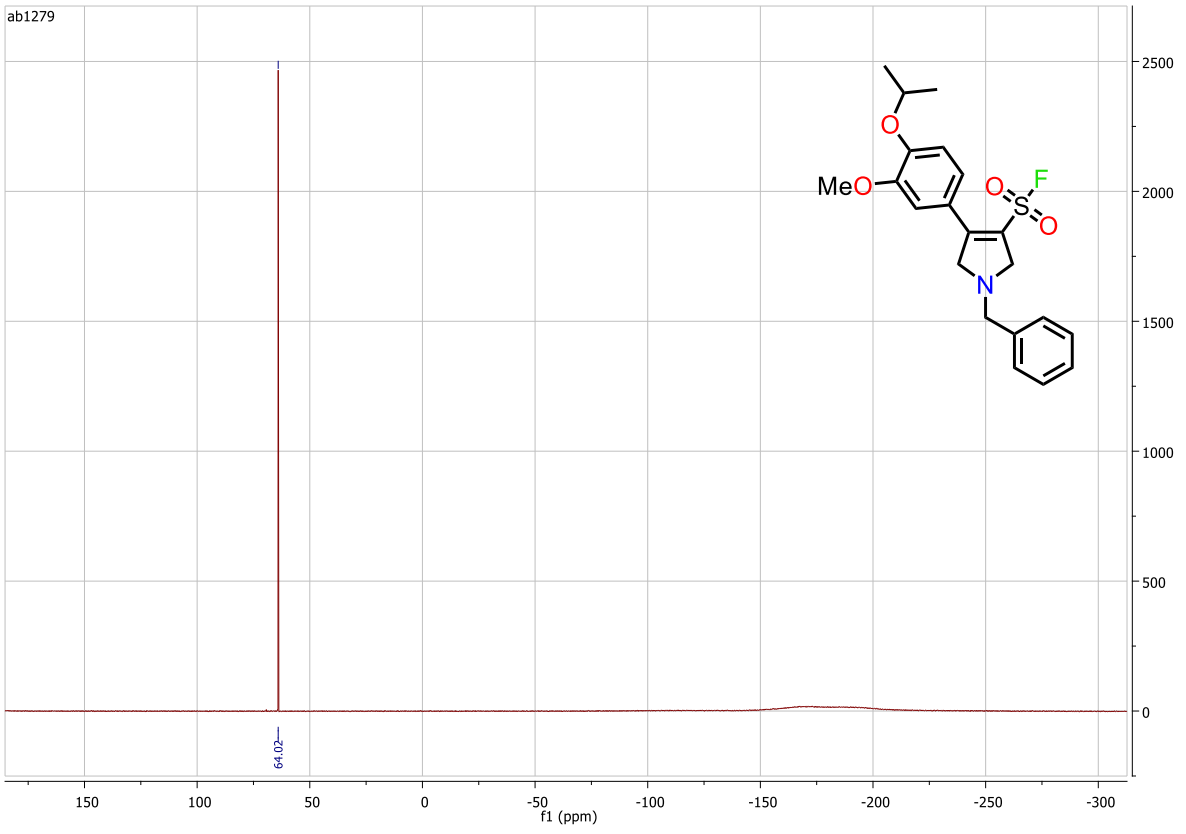

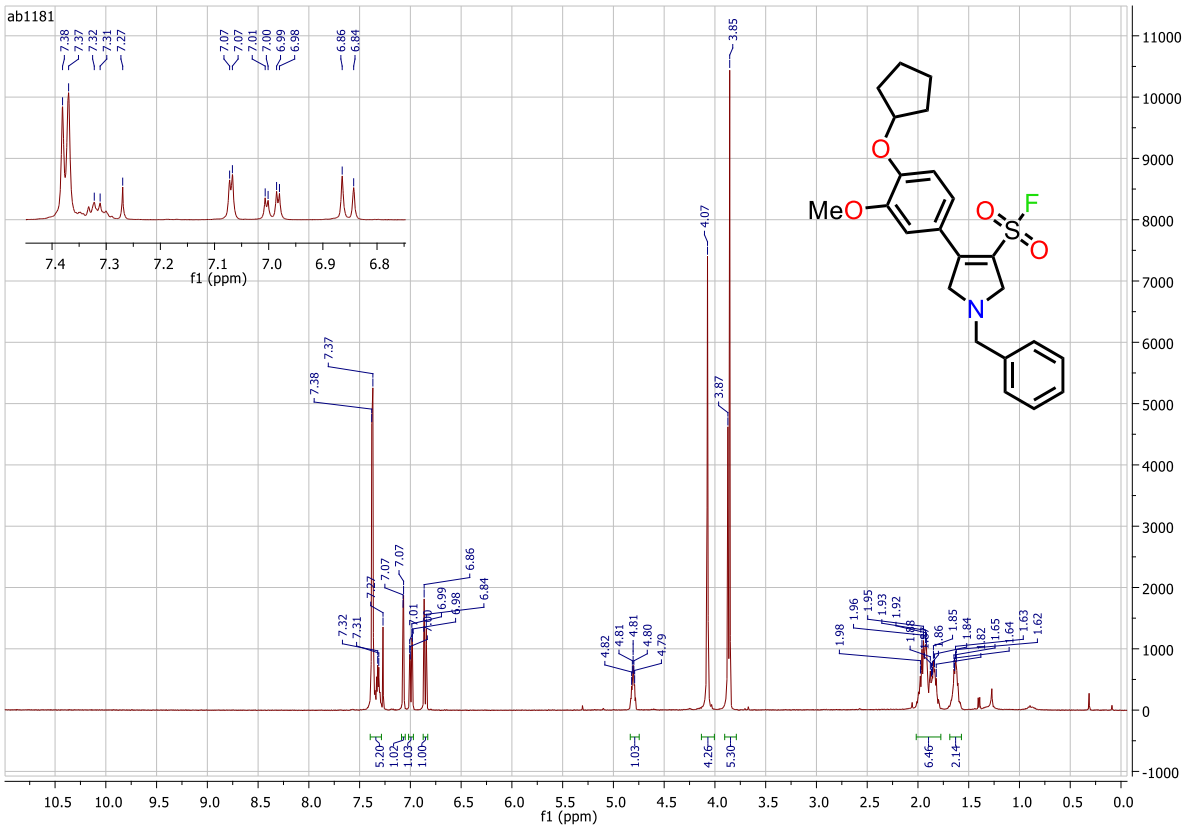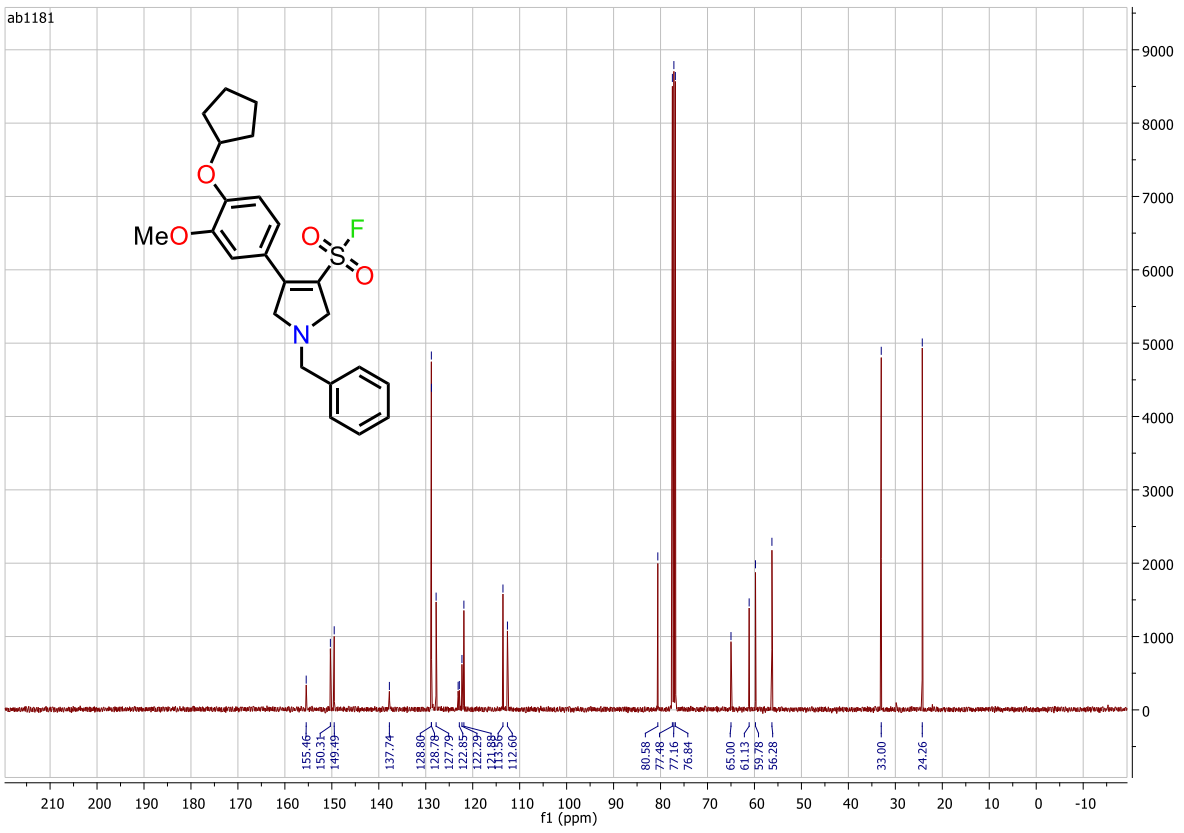

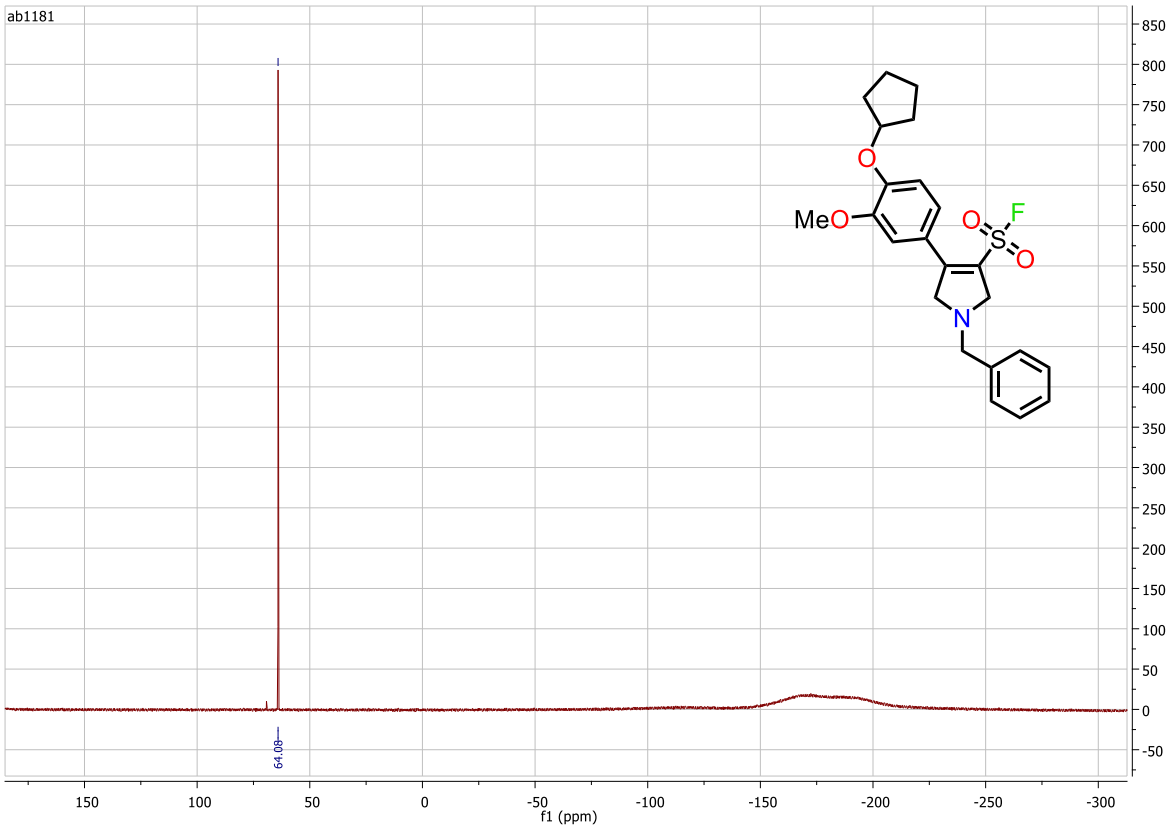

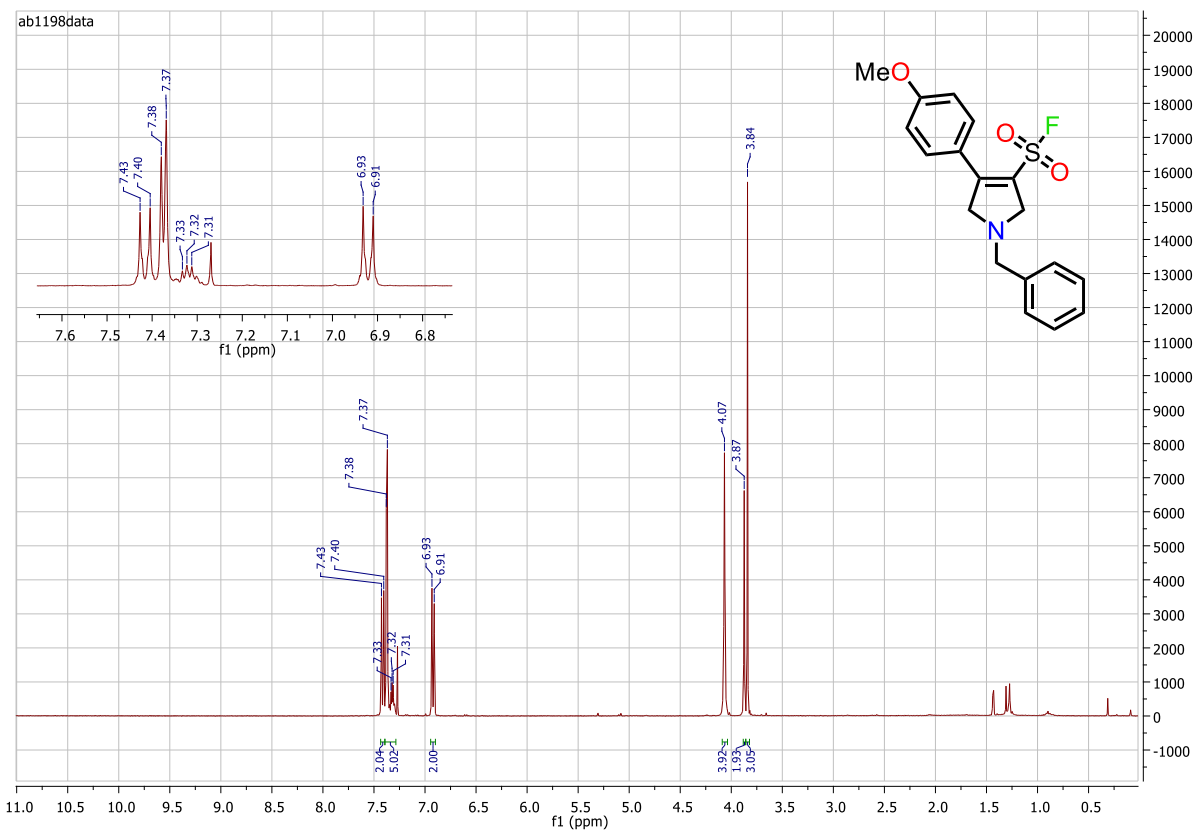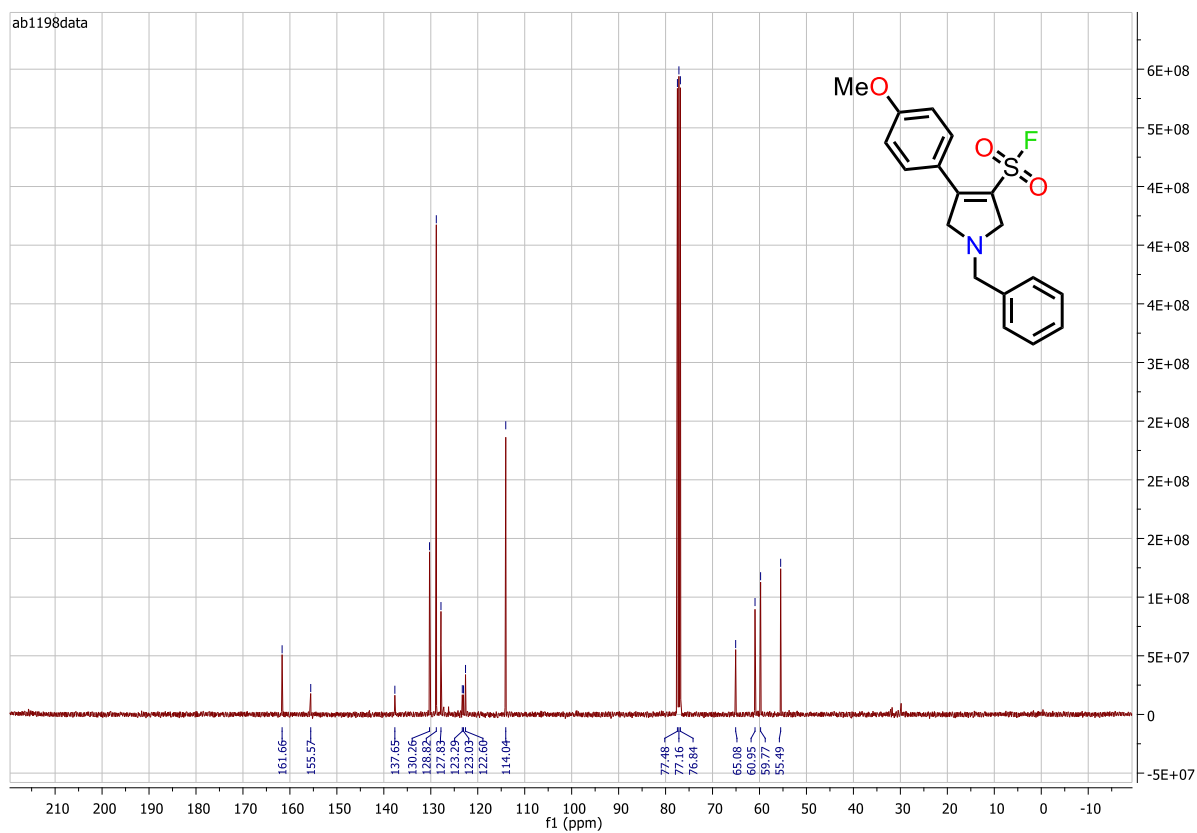



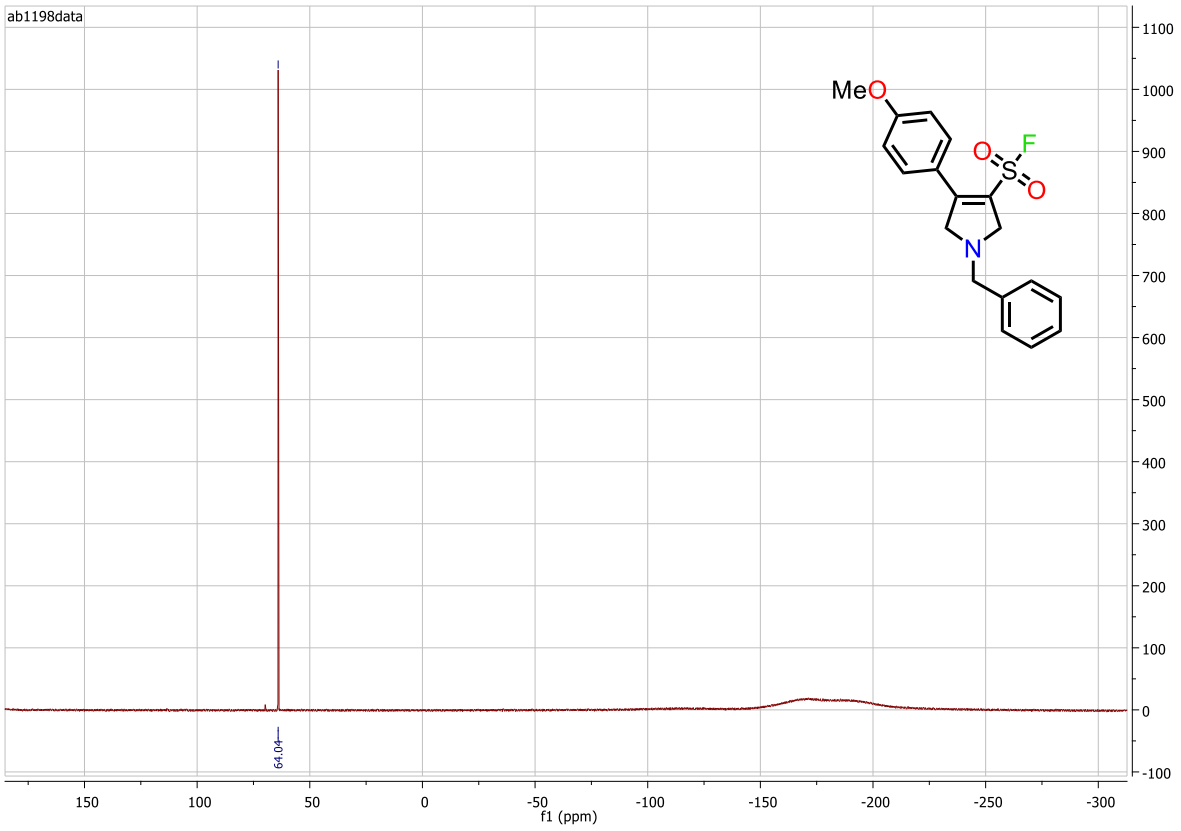

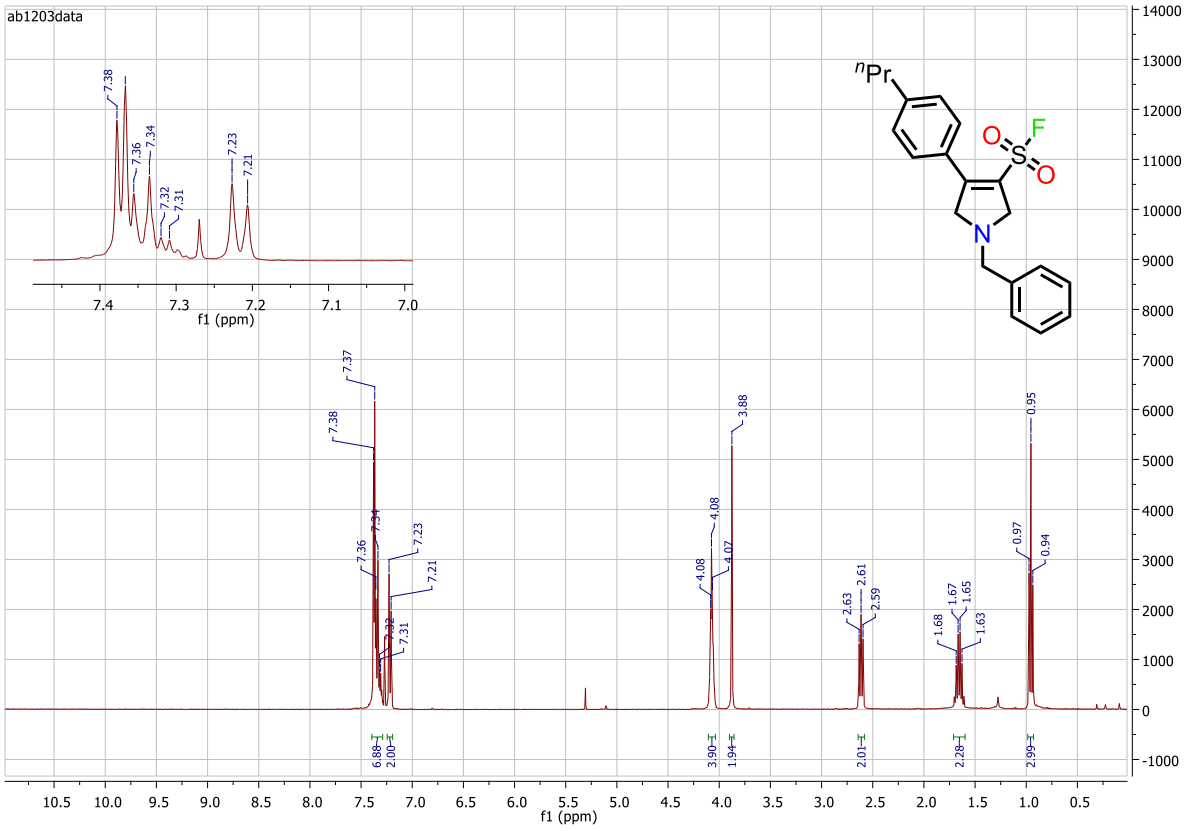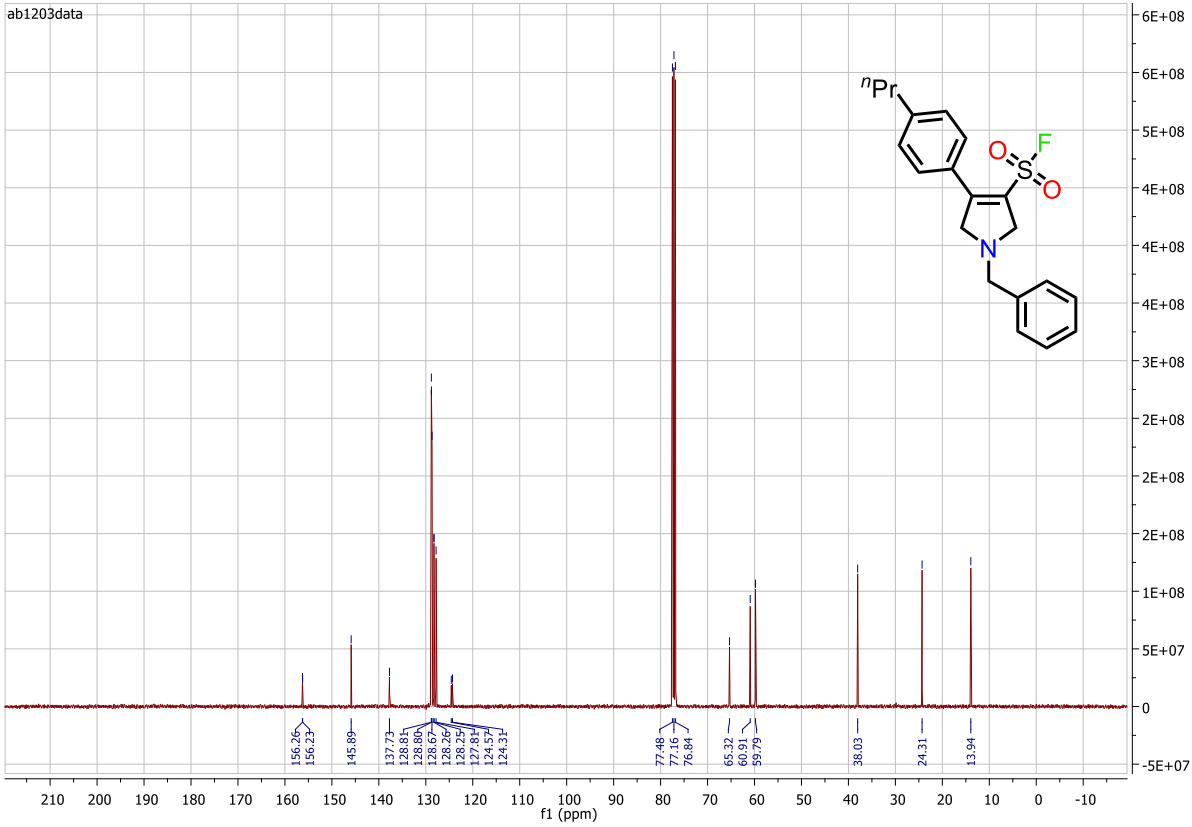

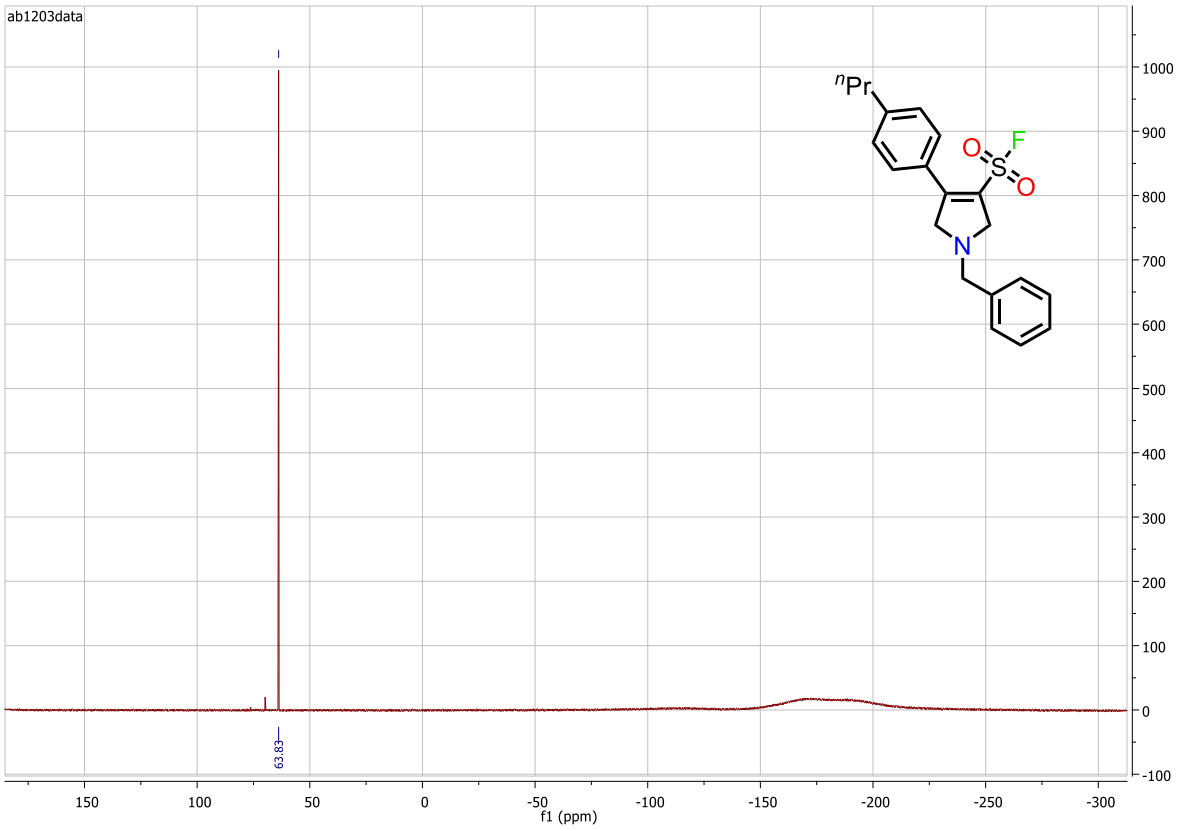

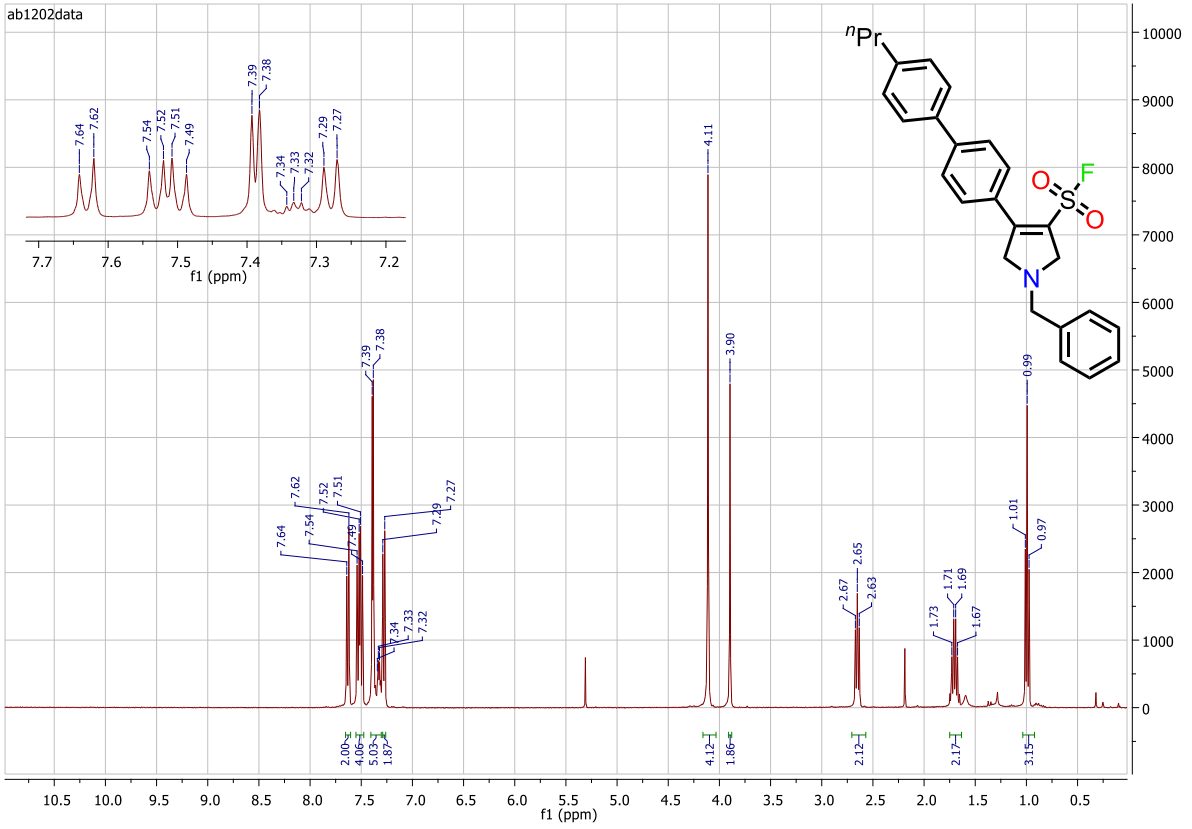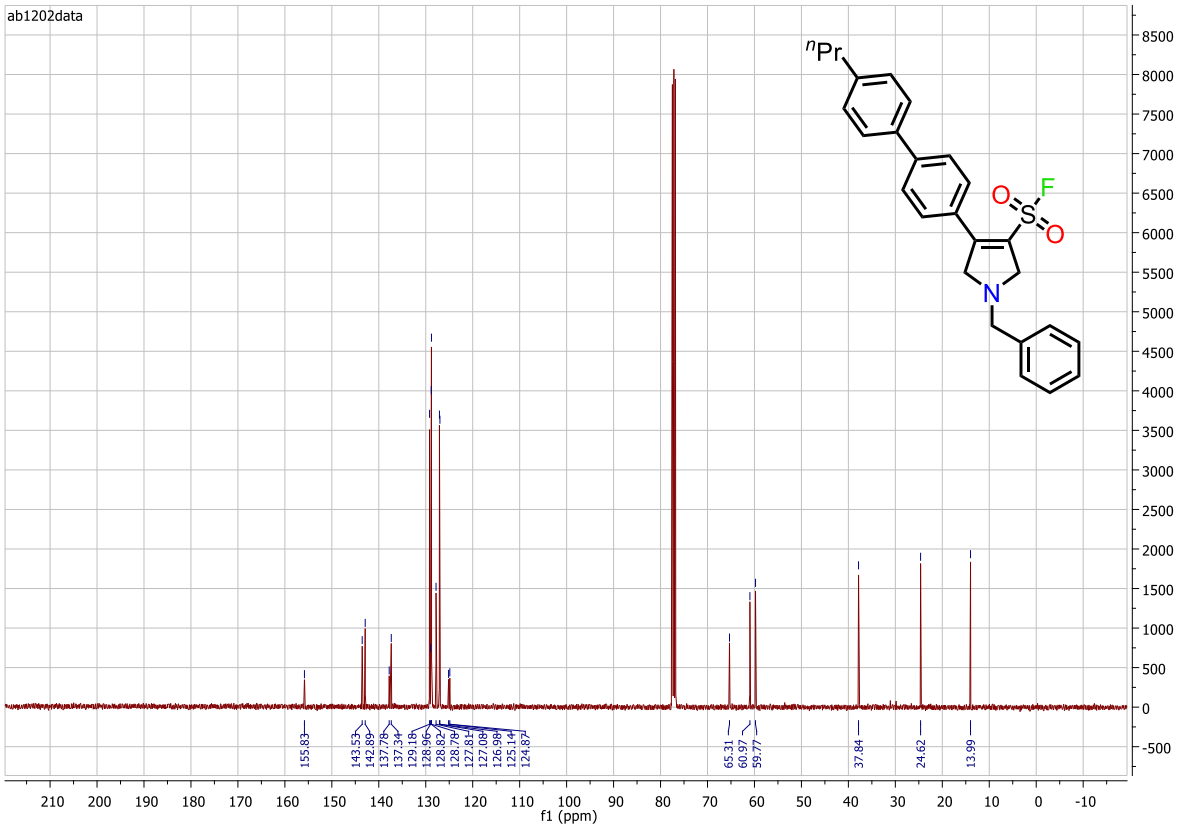

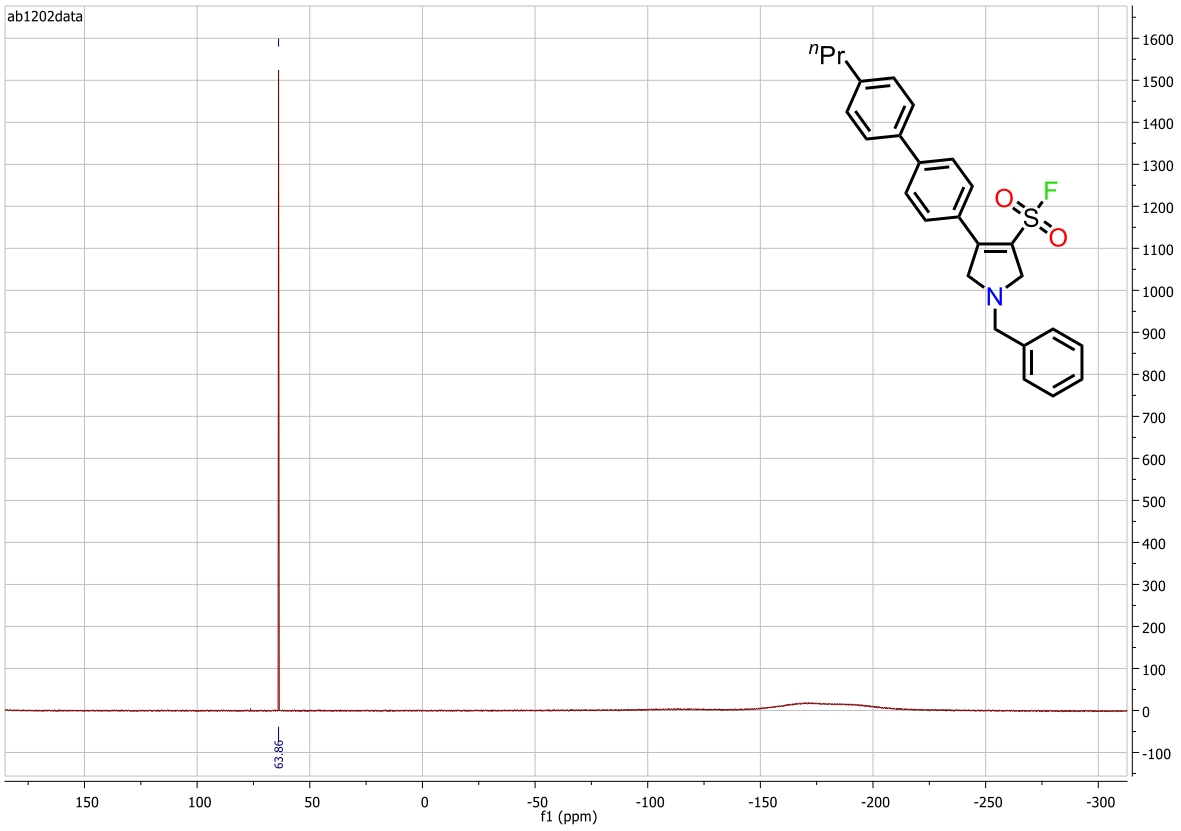

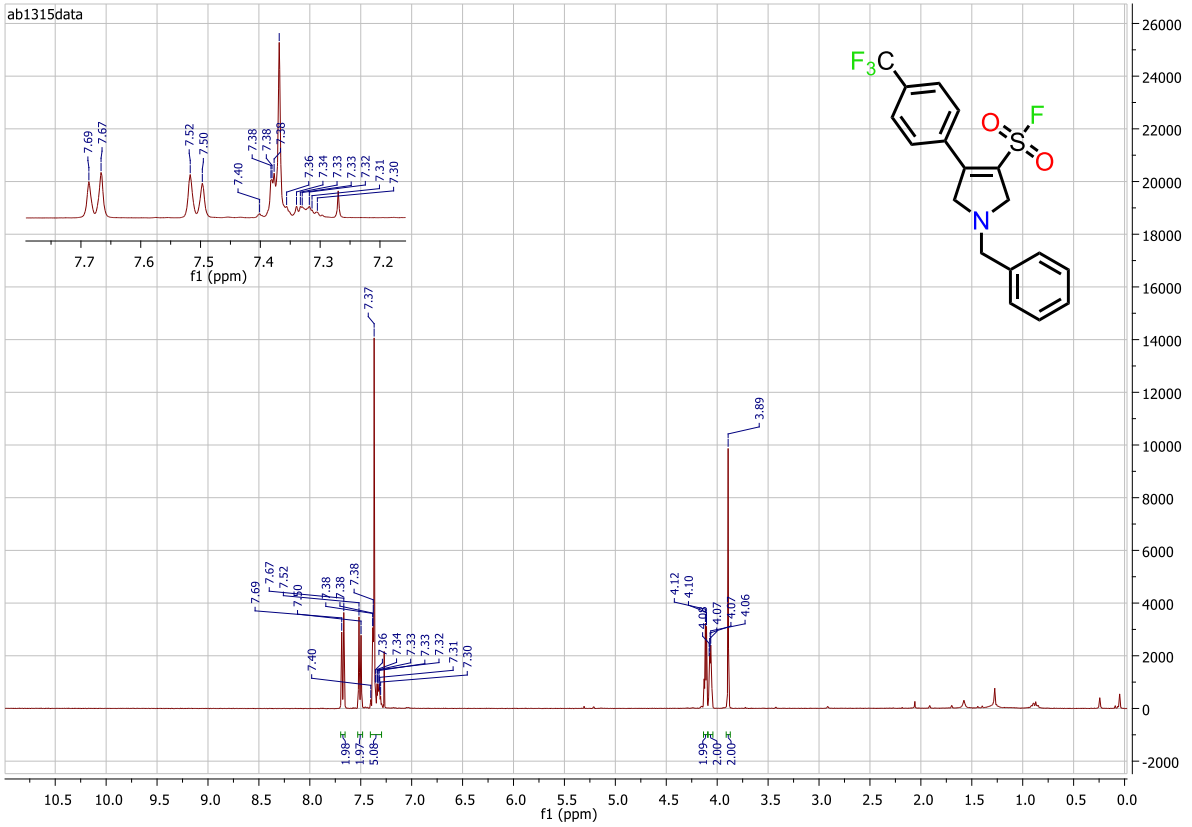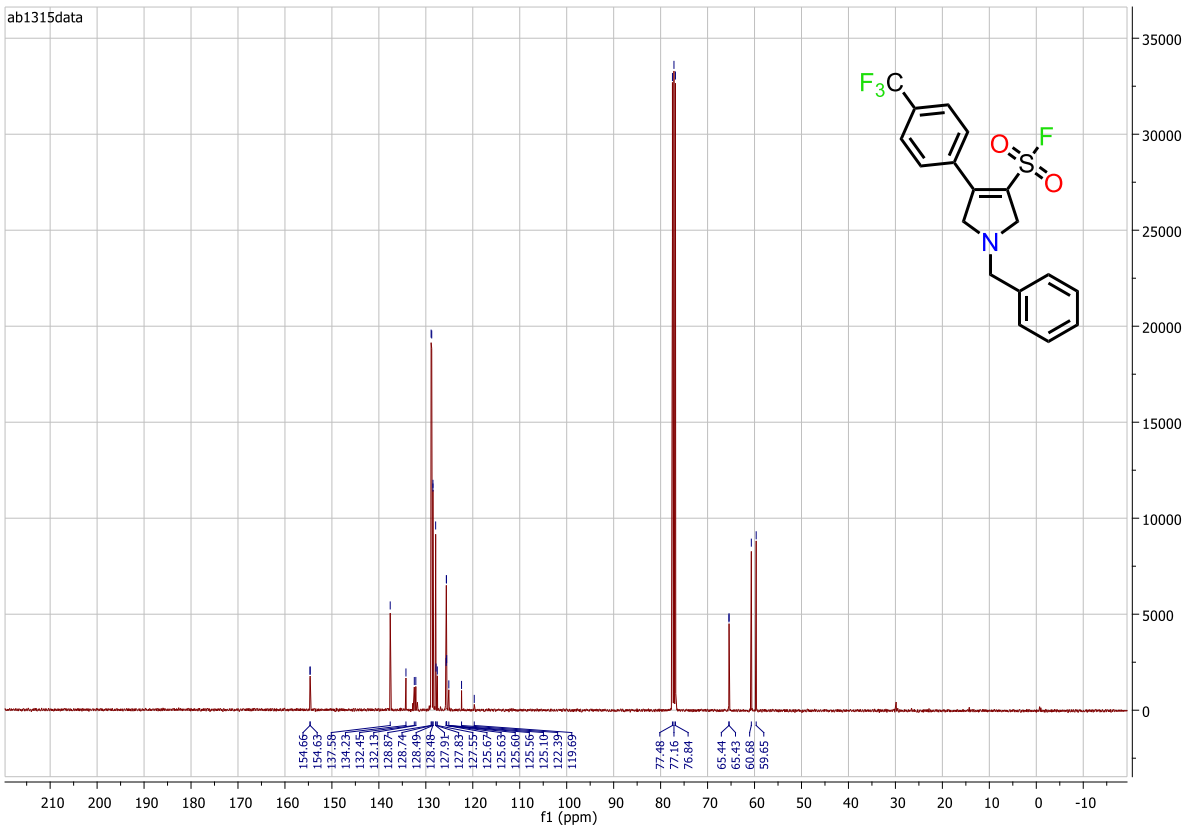

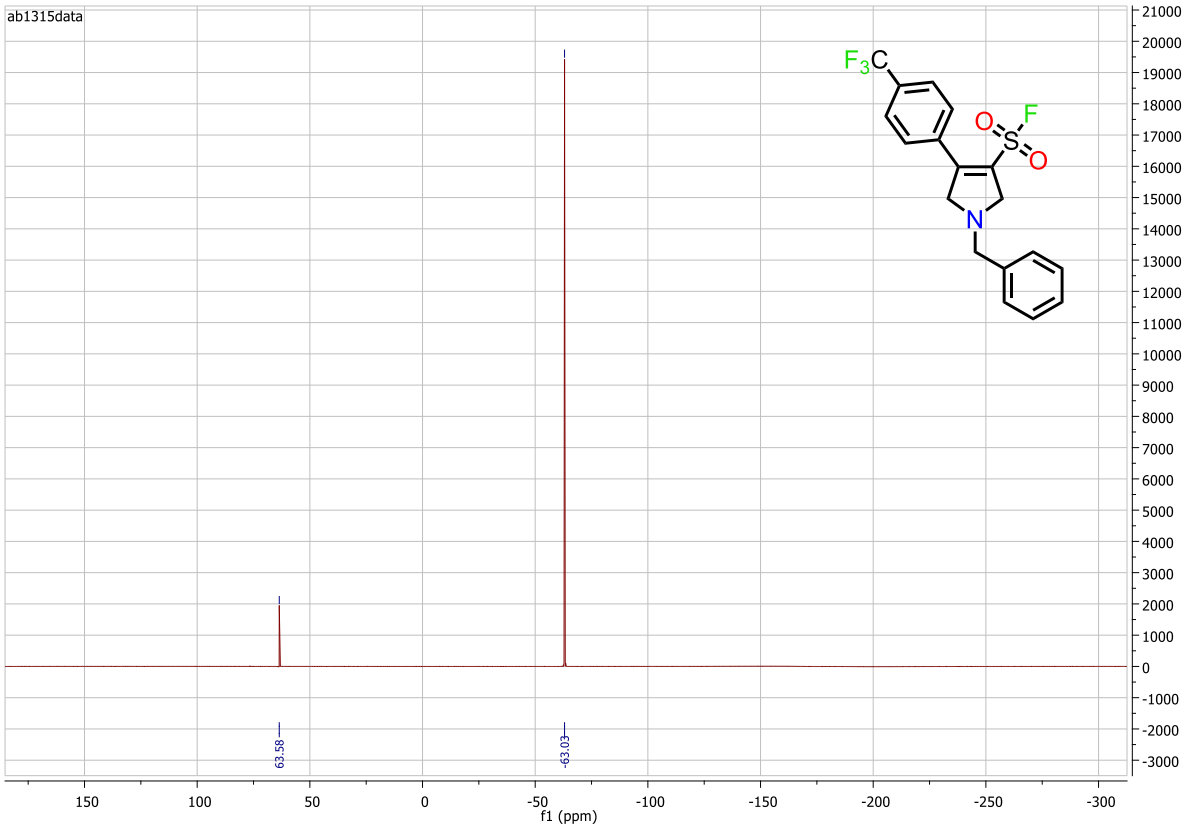

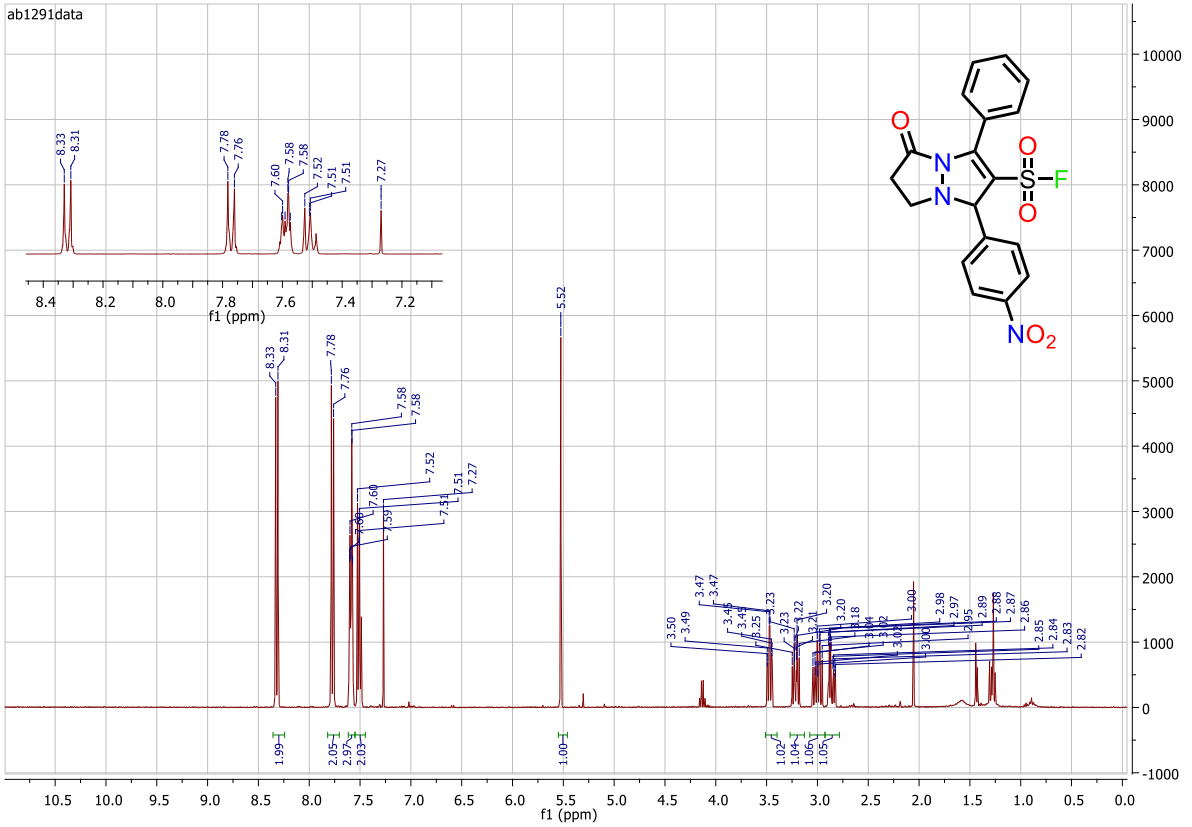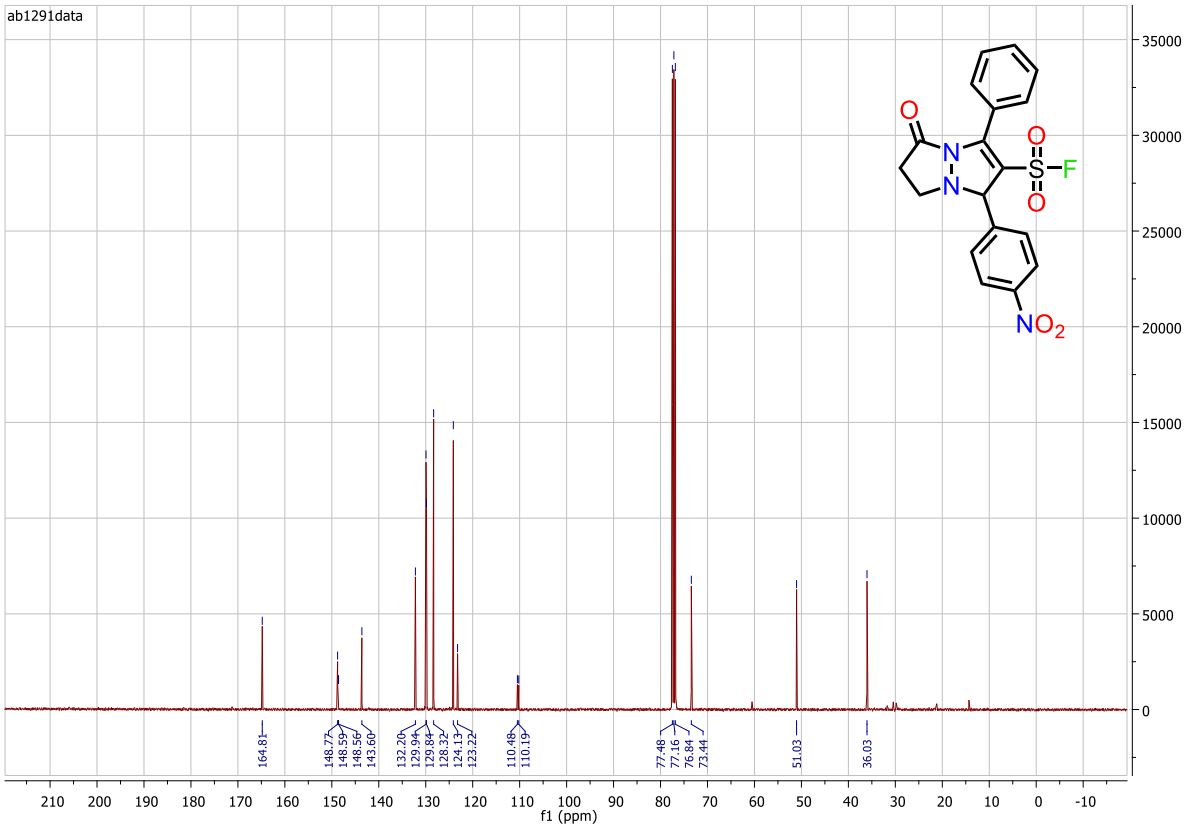



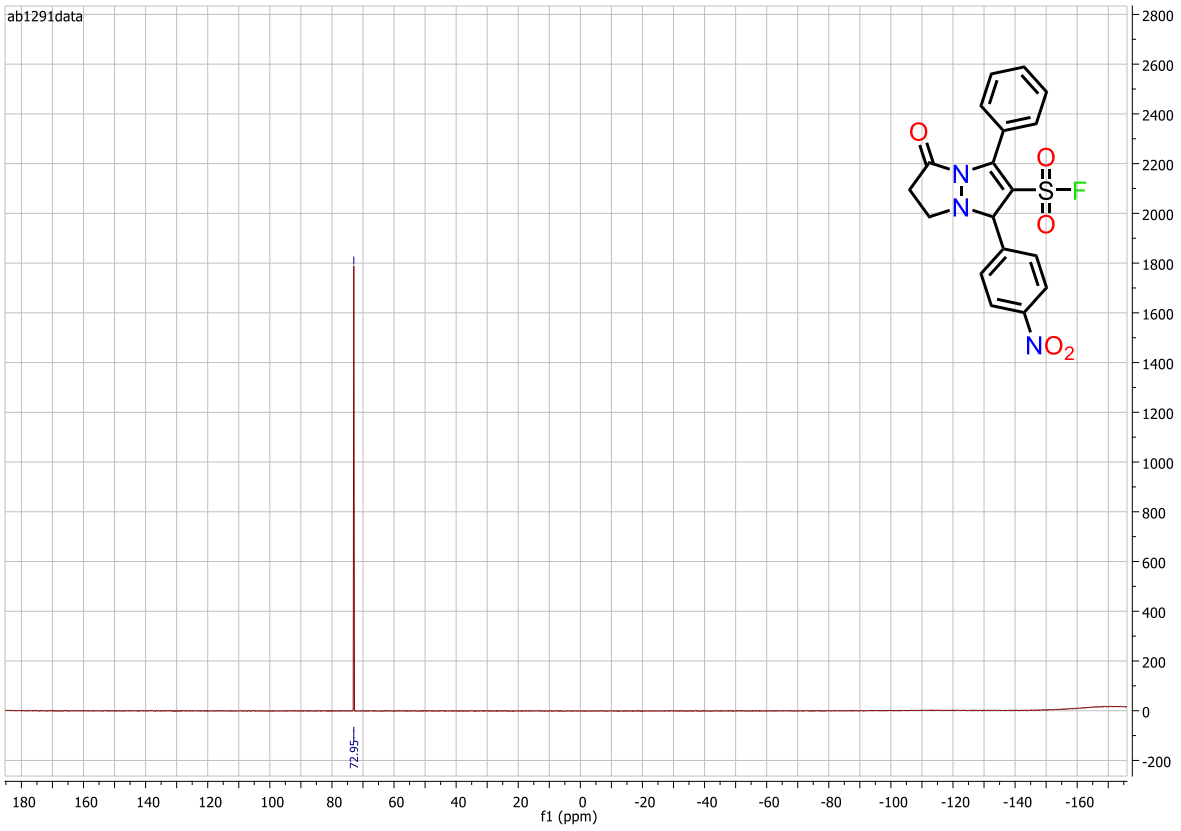

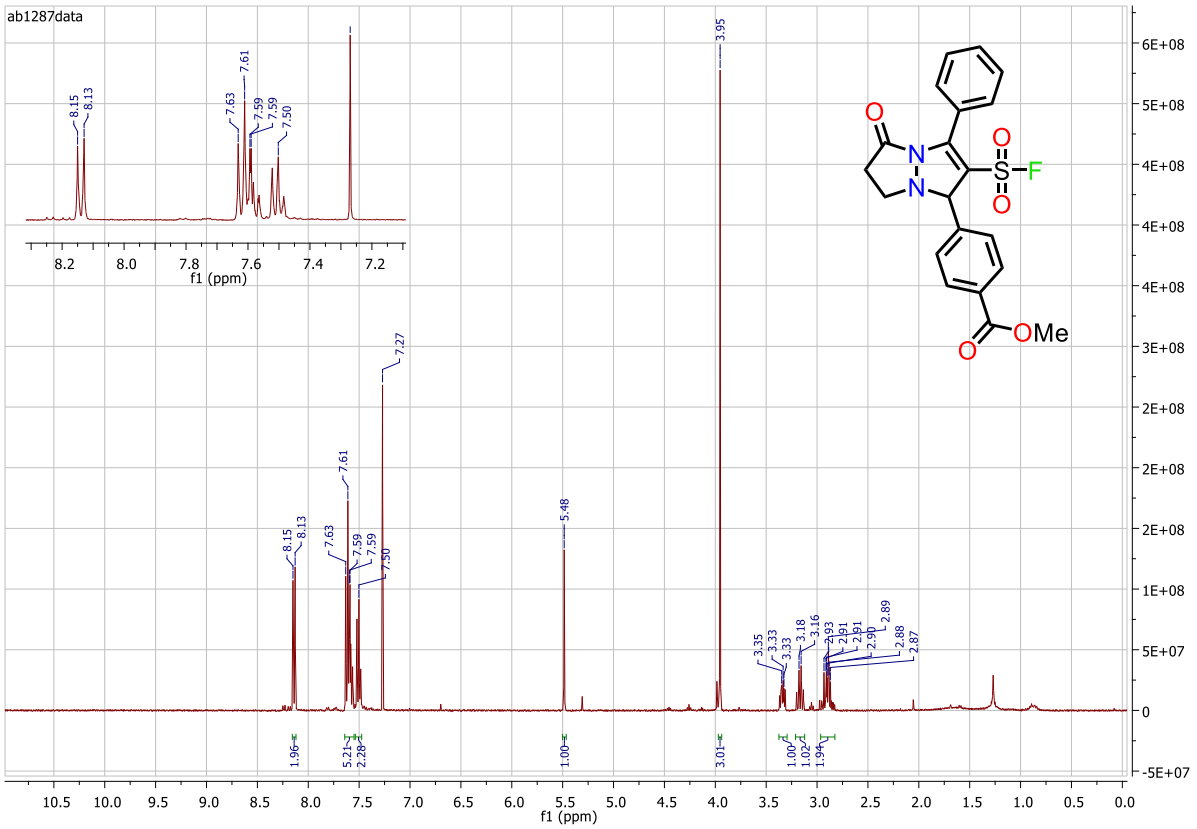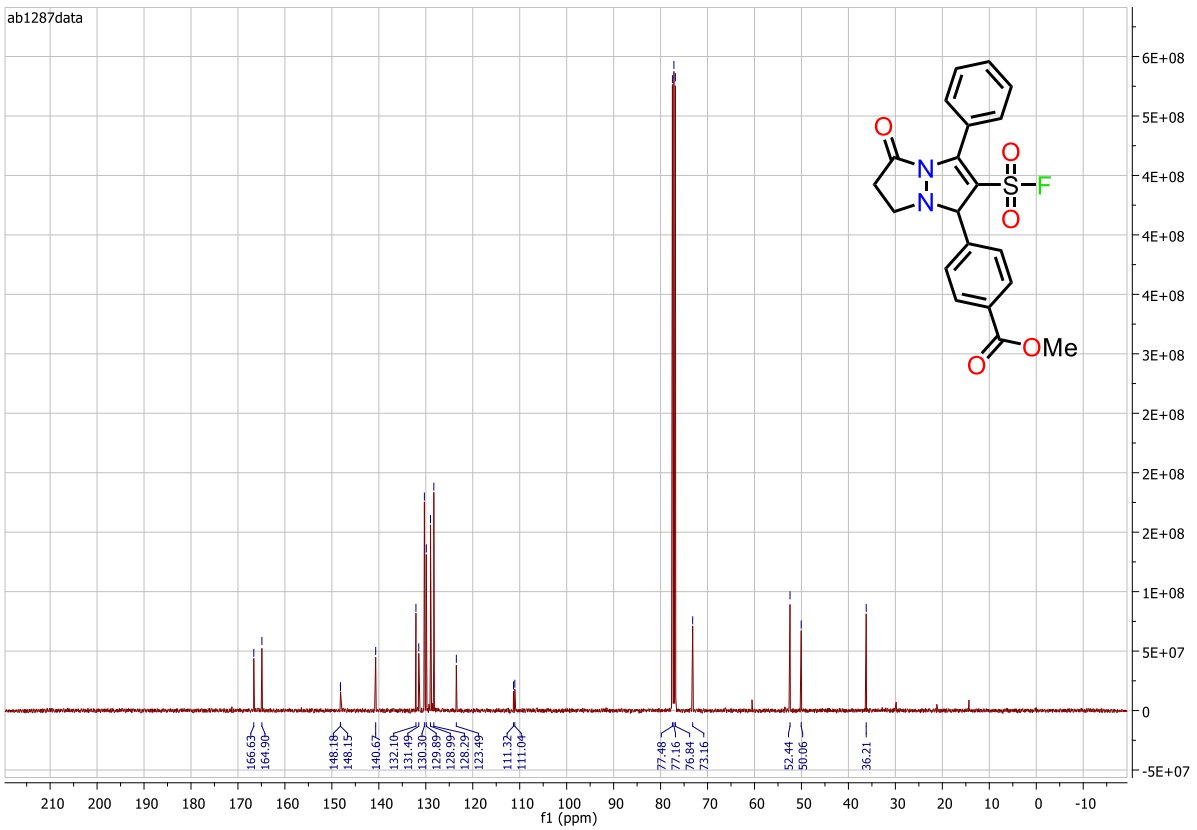

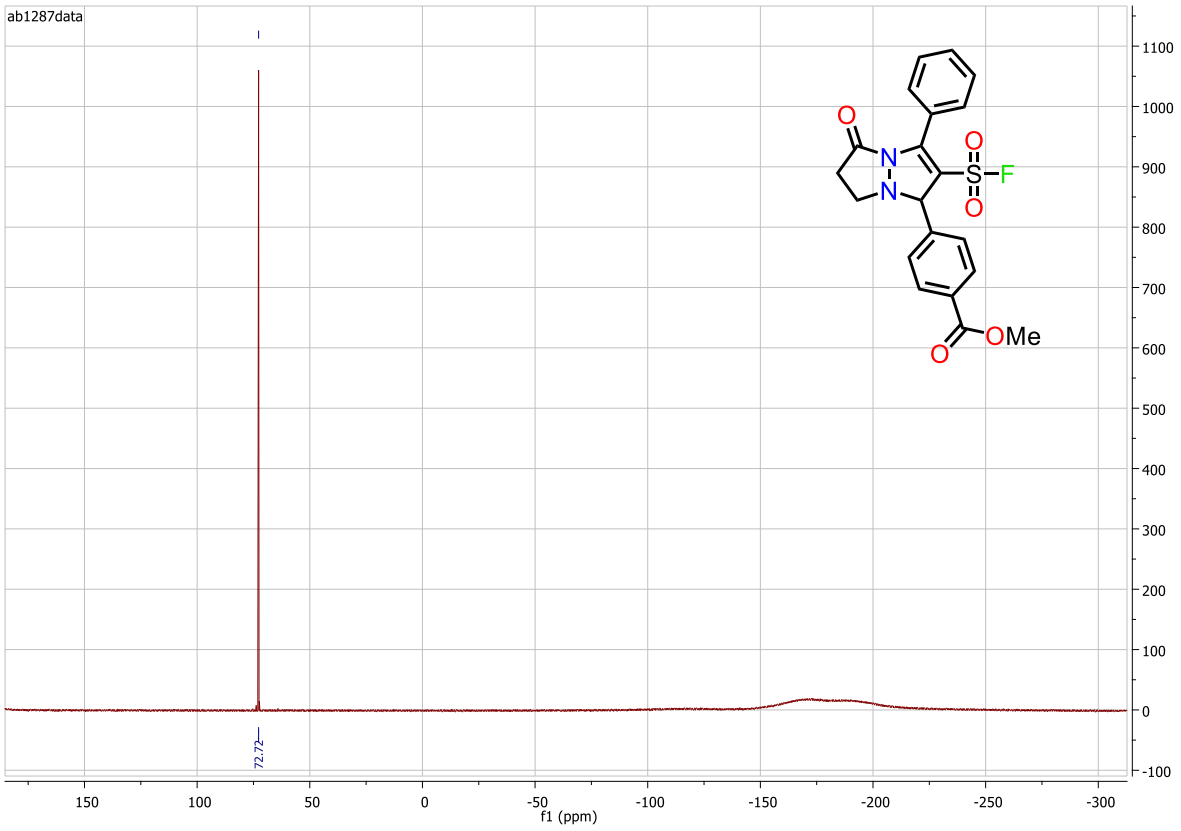

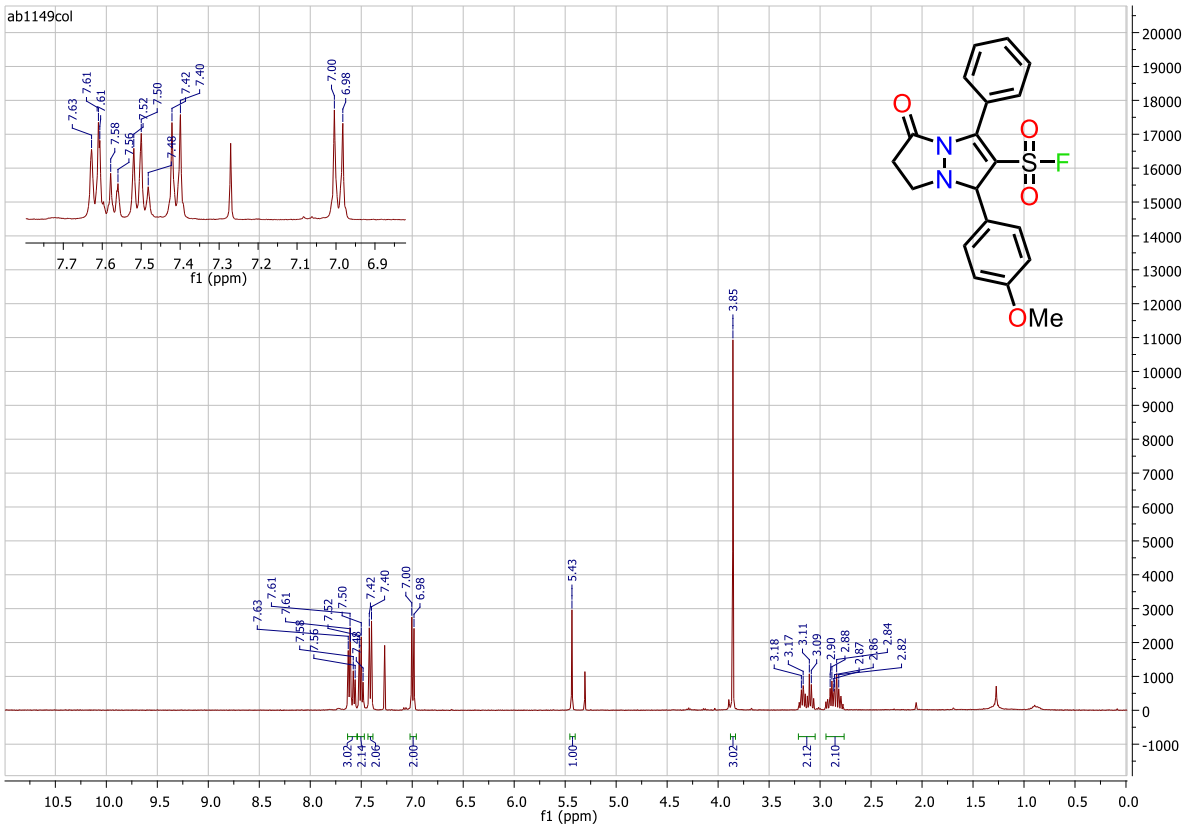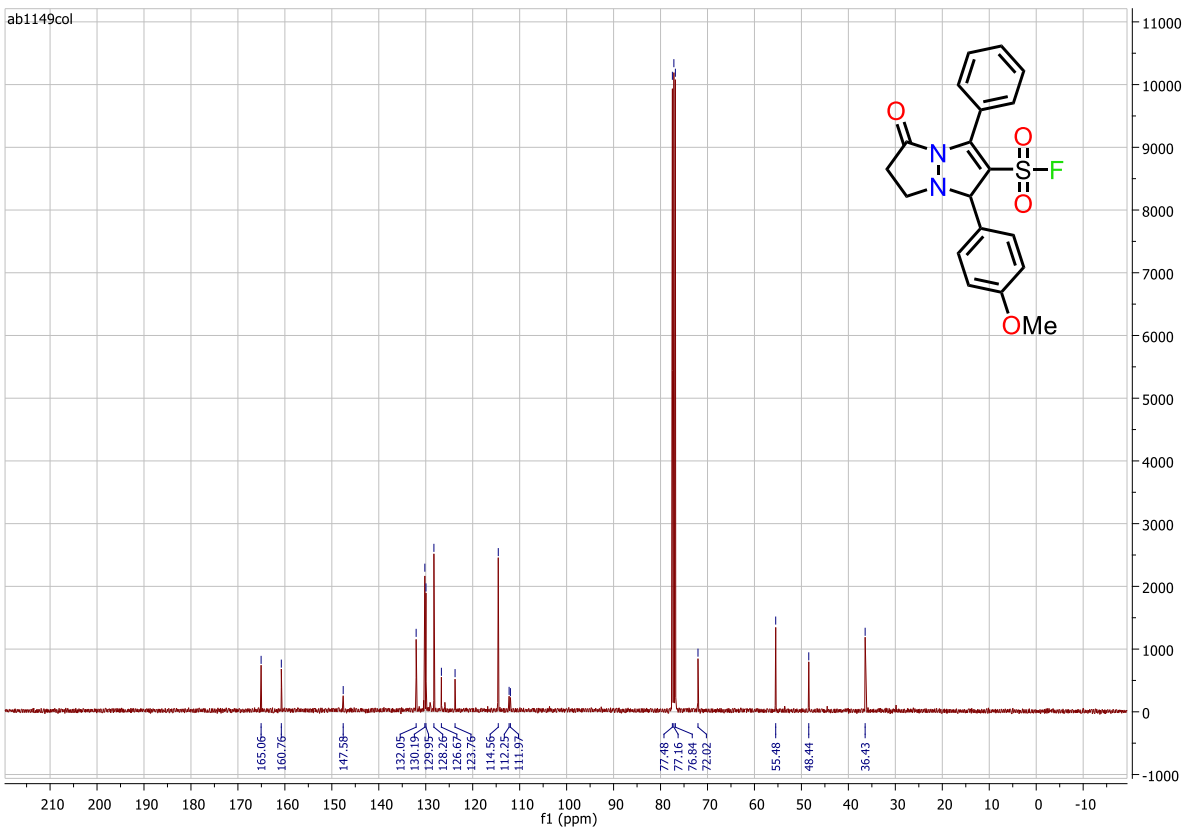

ab1149col

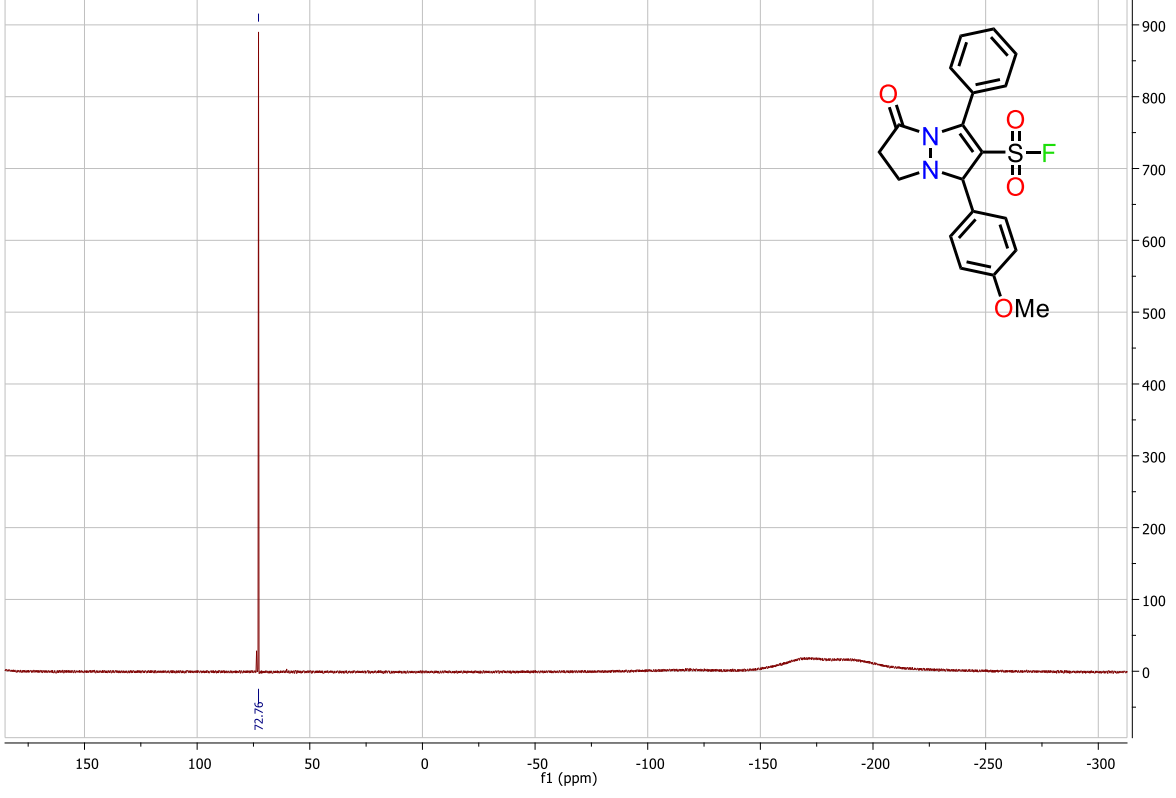

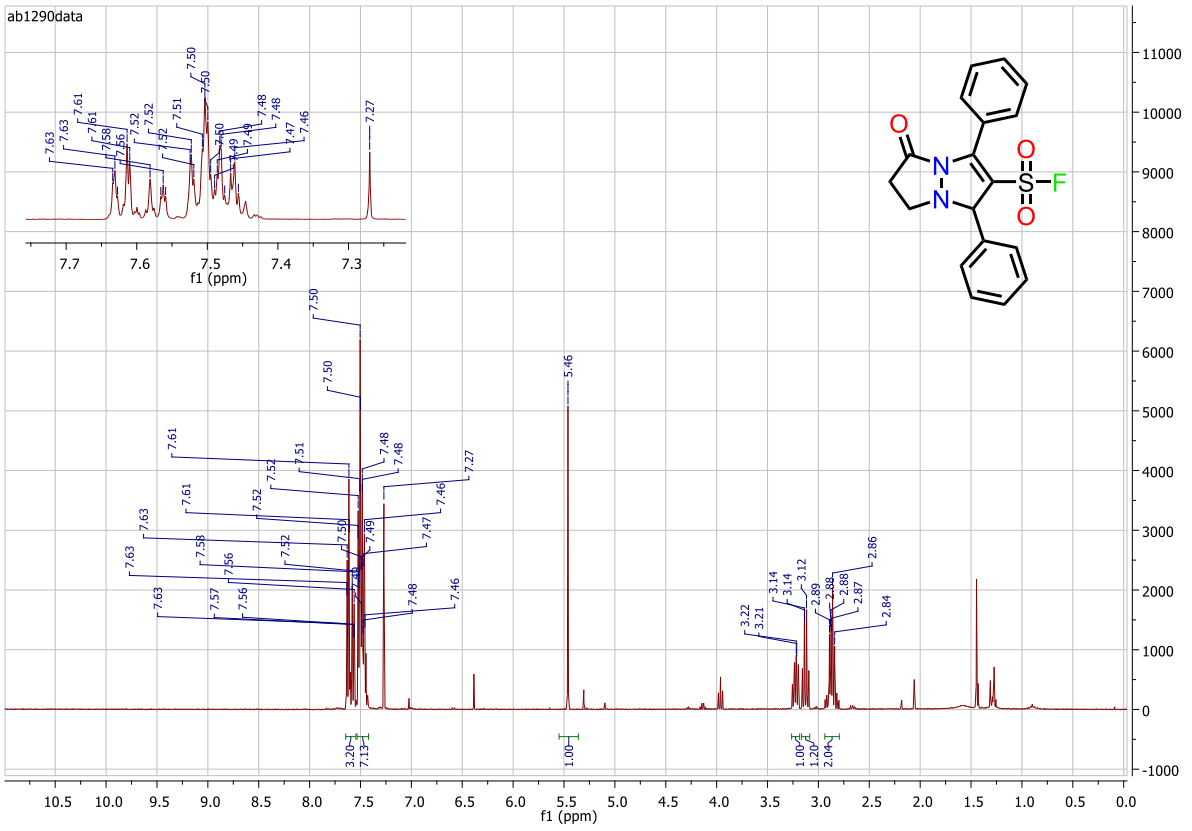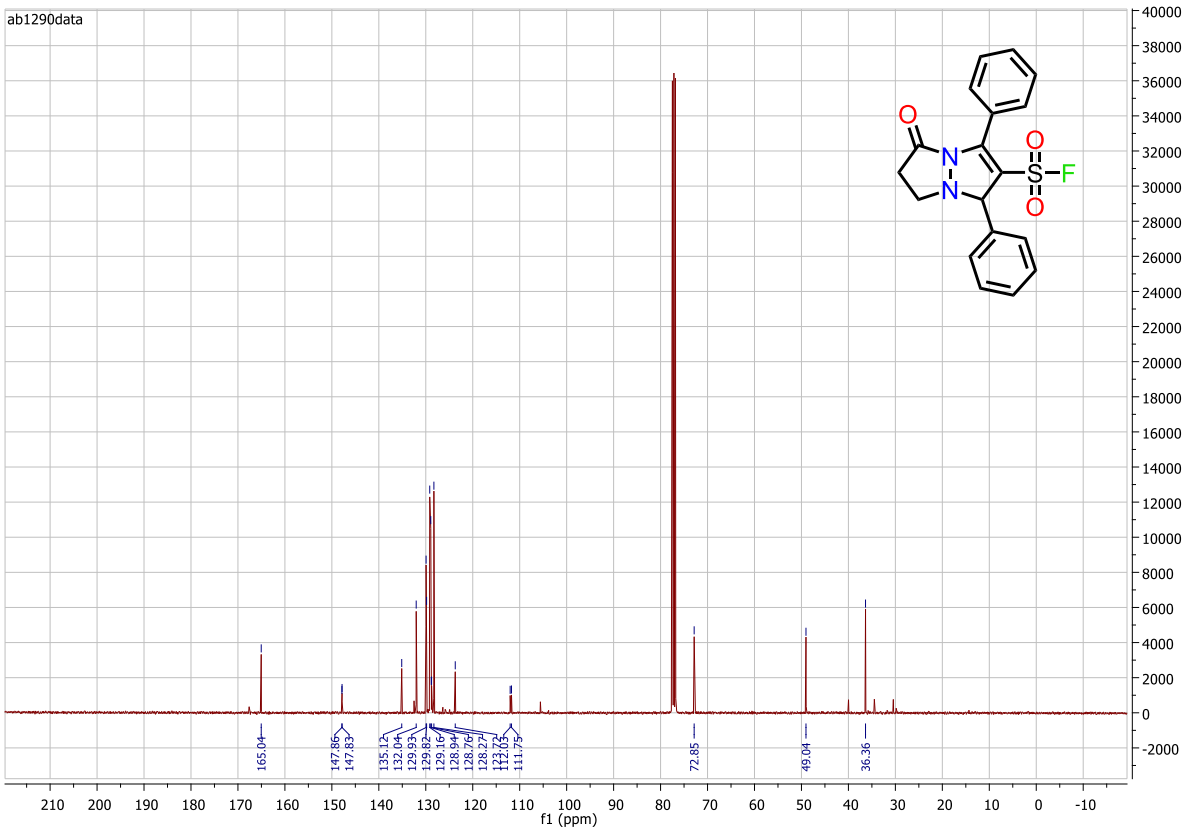

ab1290data

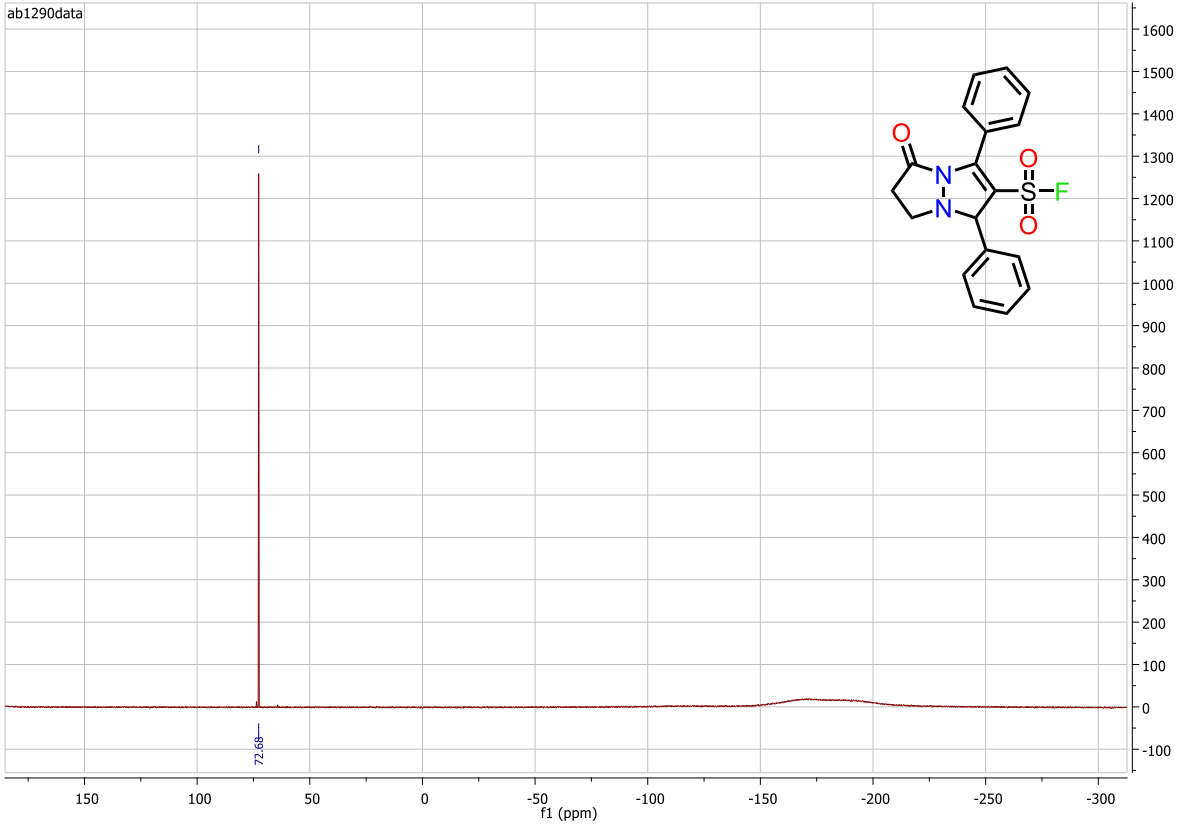

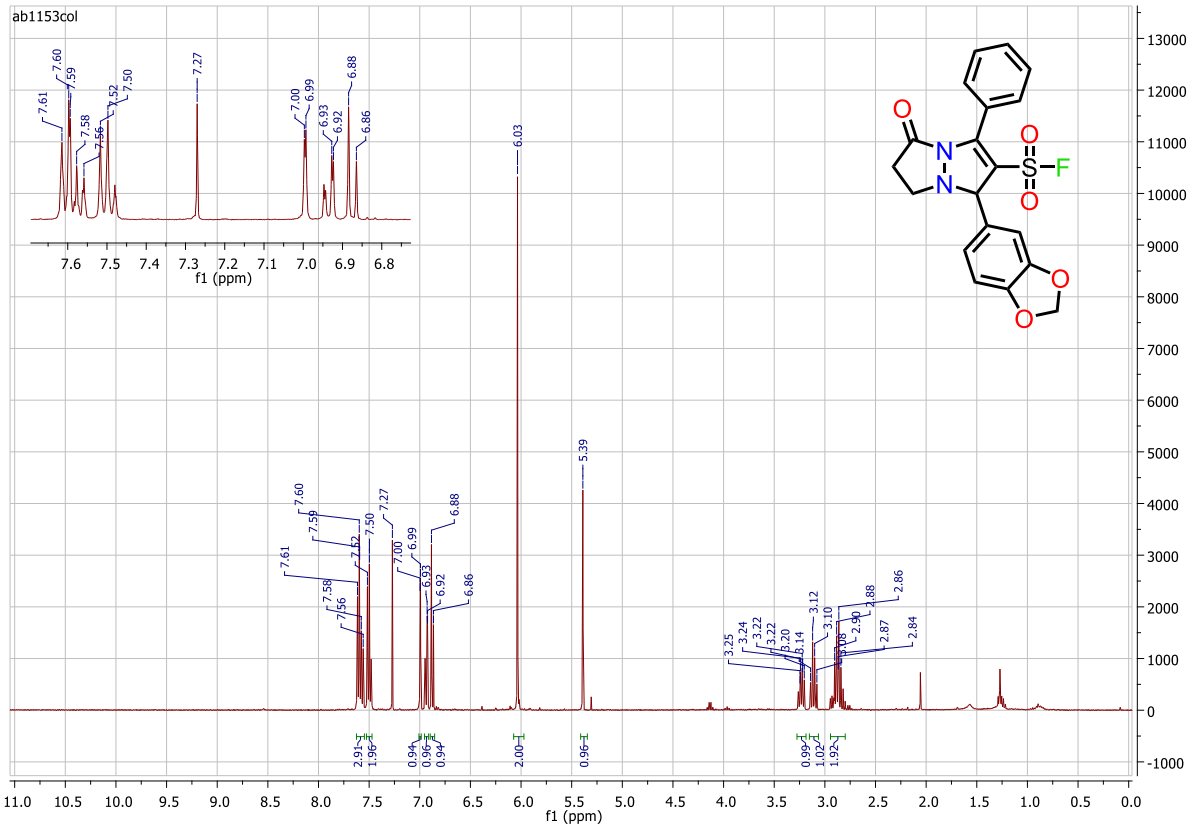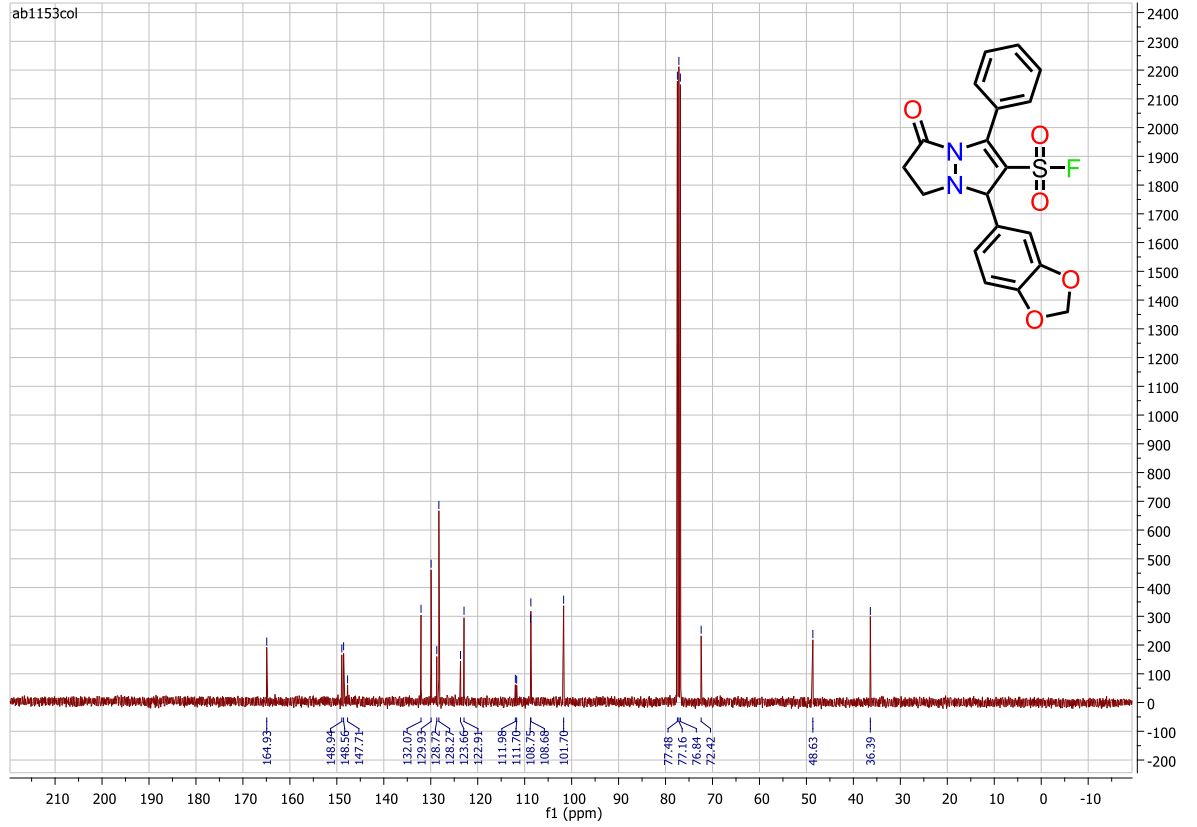



ab1153col

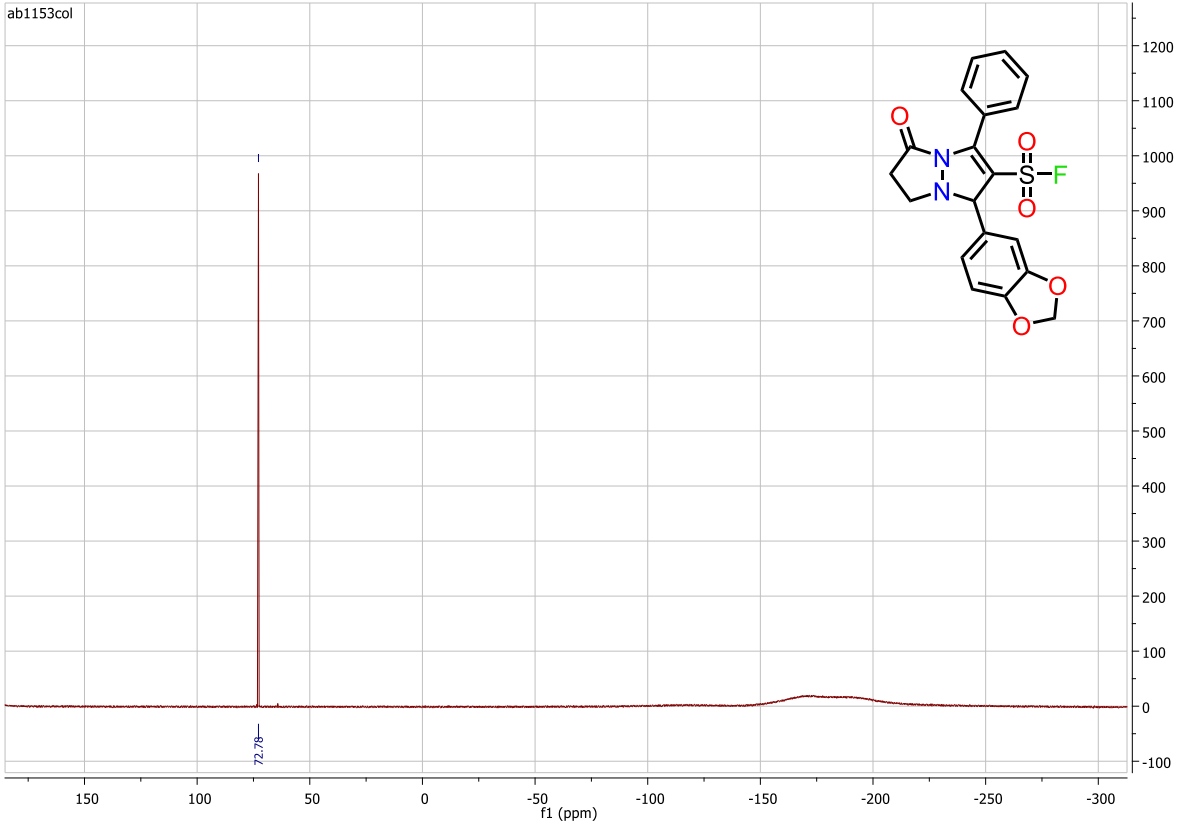

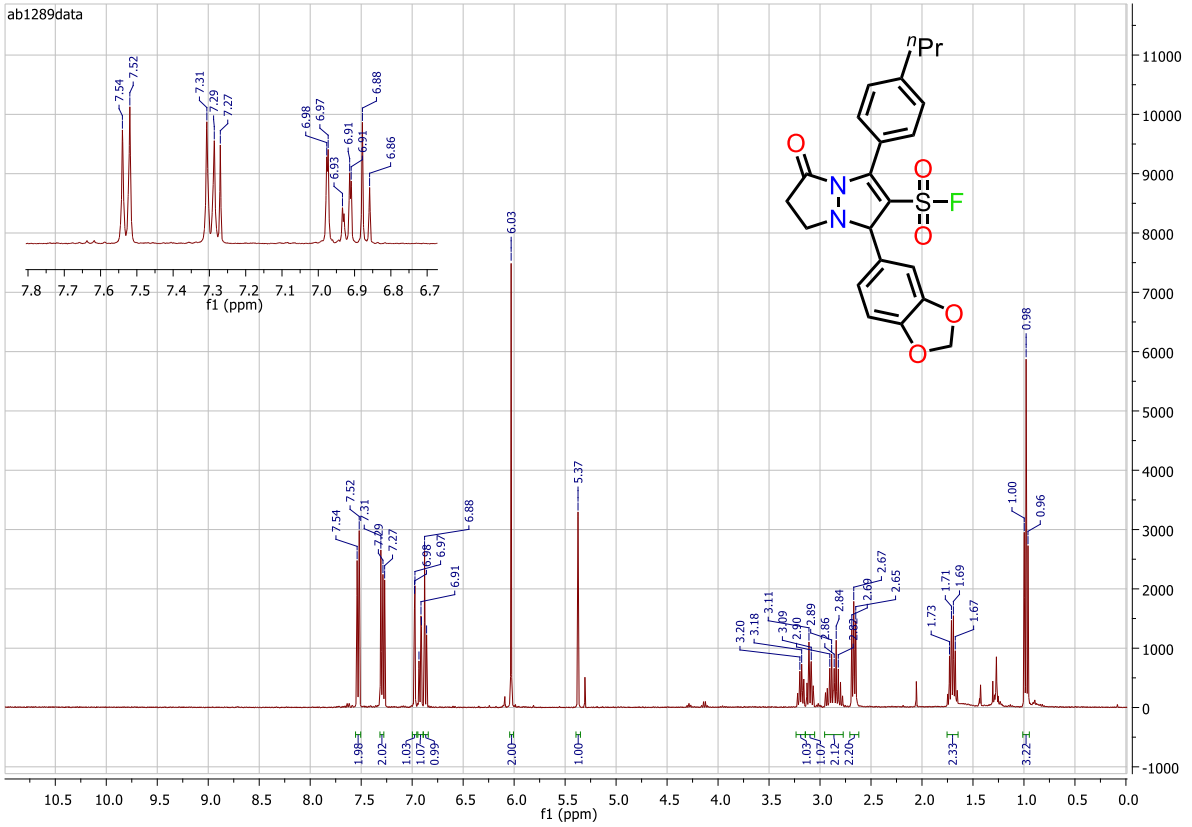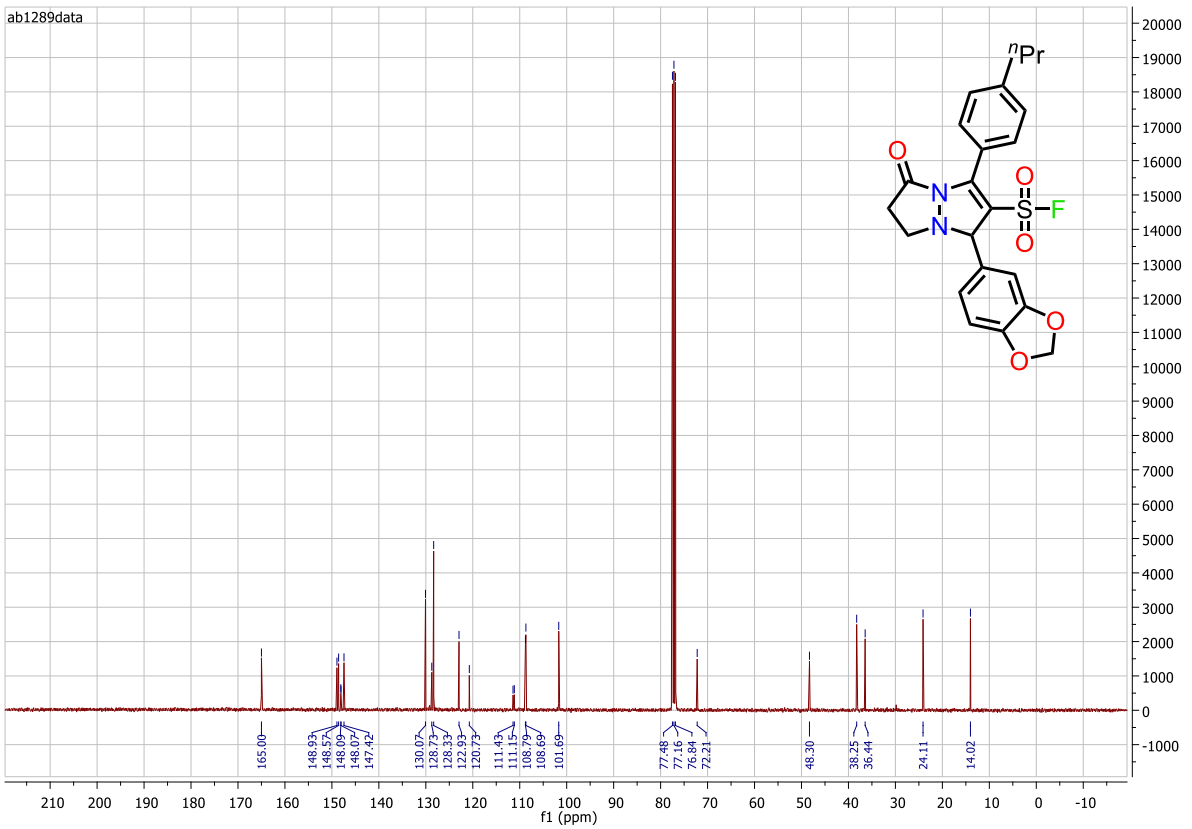

ab1289data

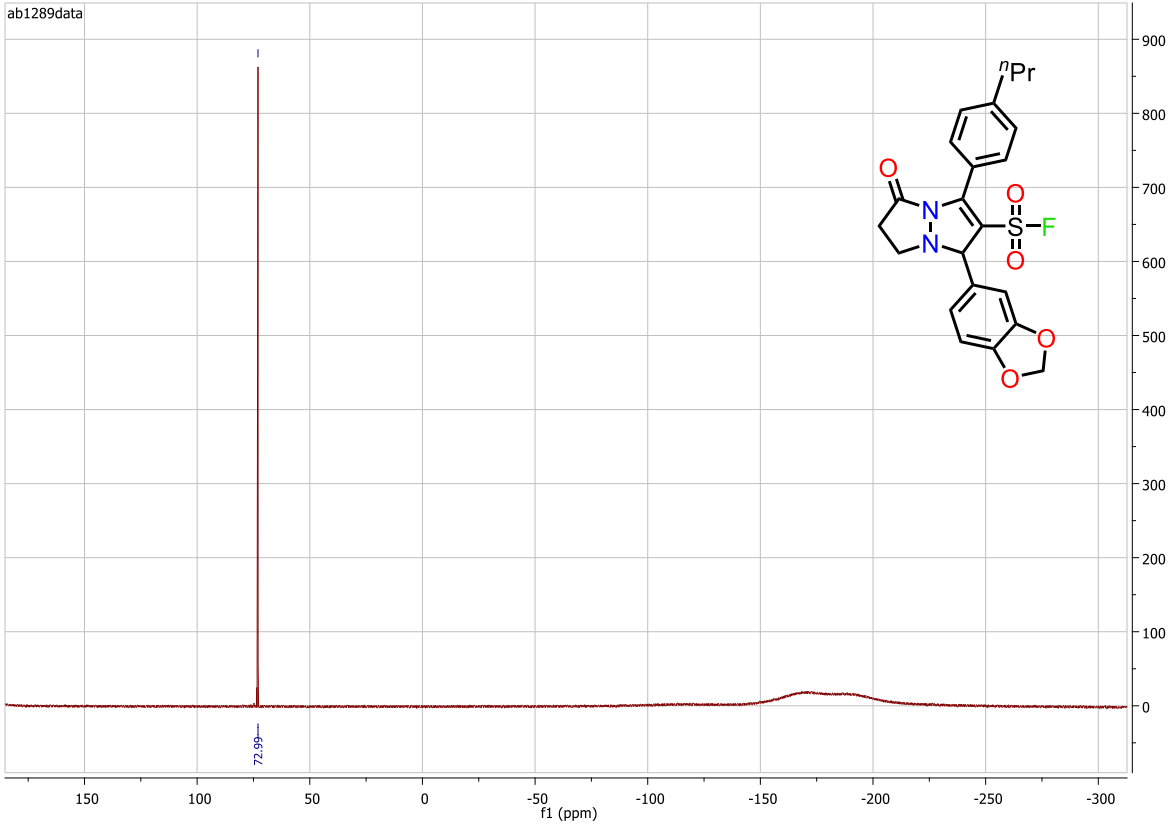

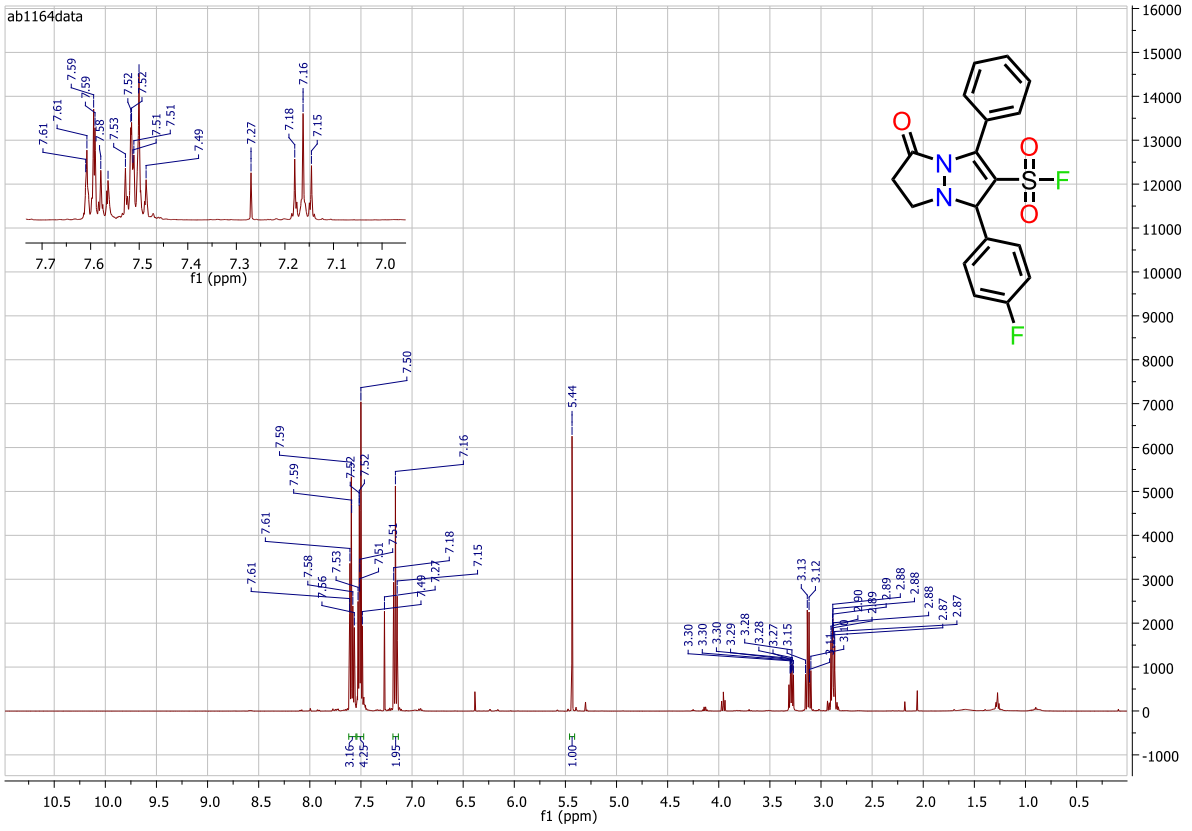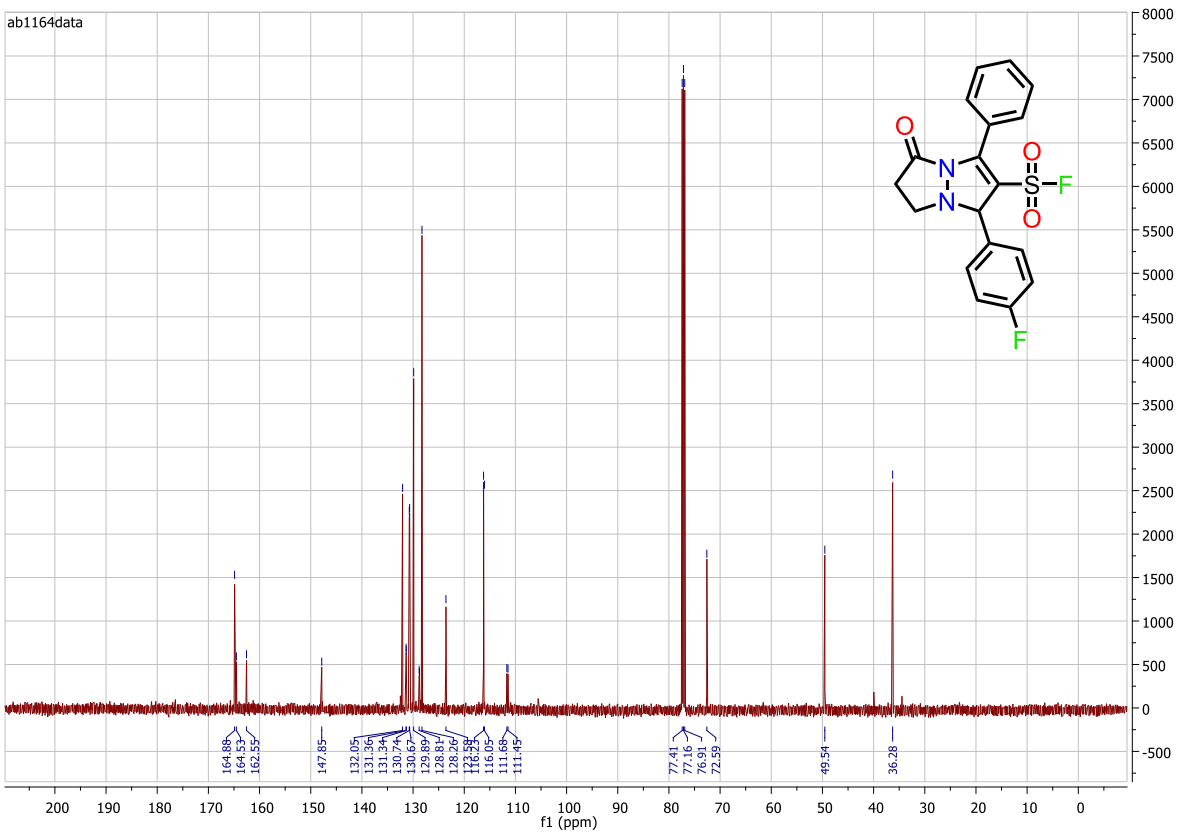

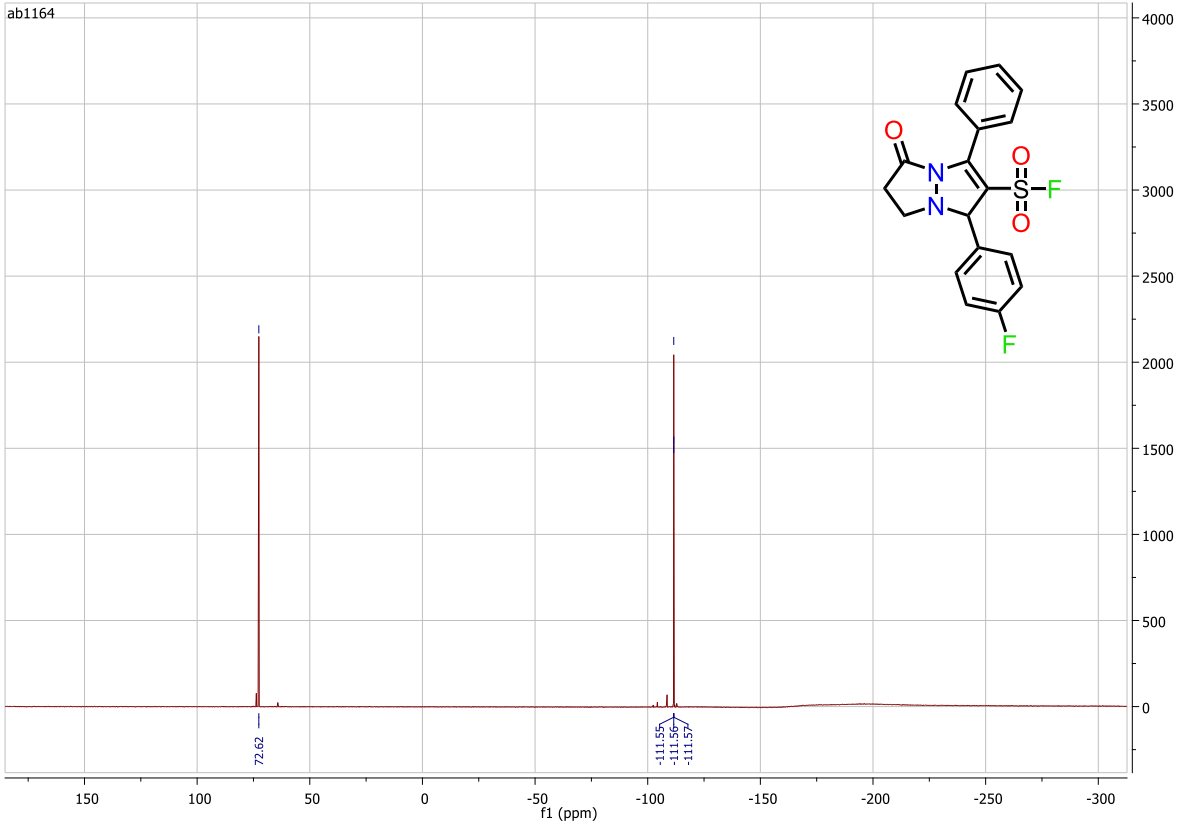

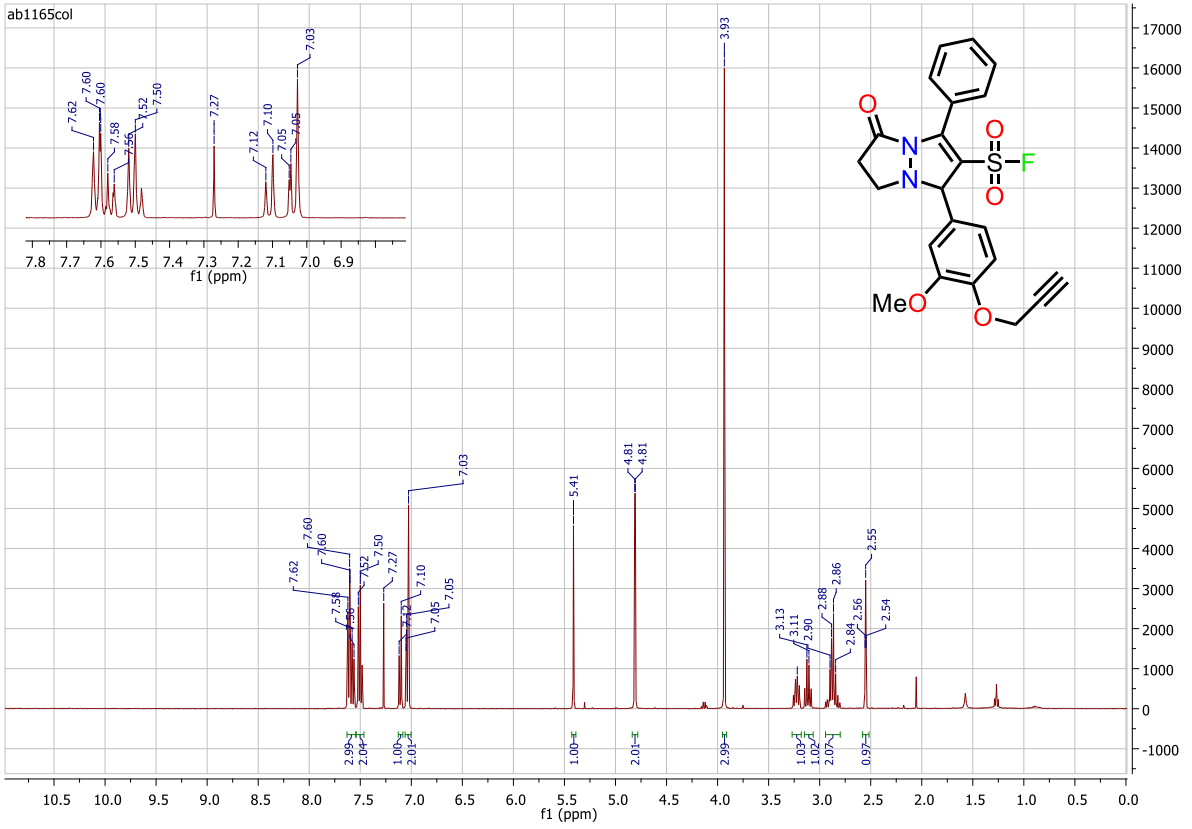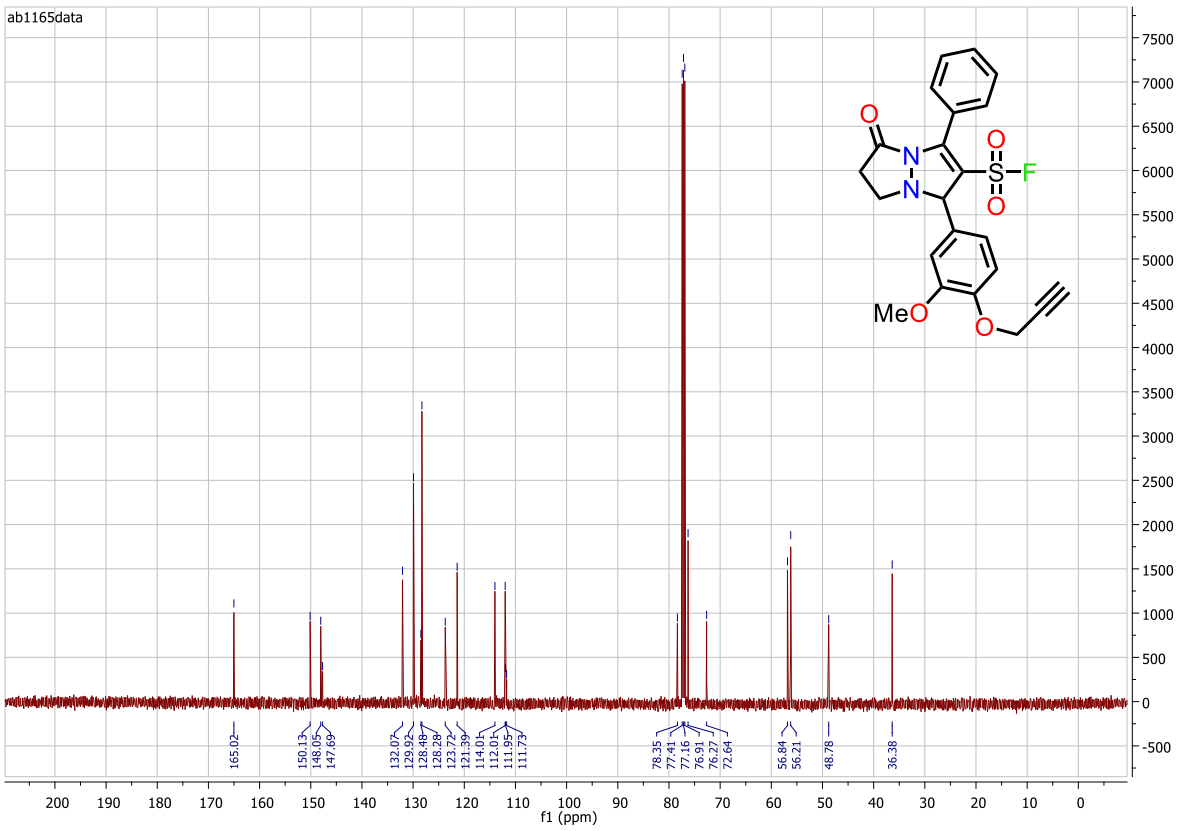

ab1165col

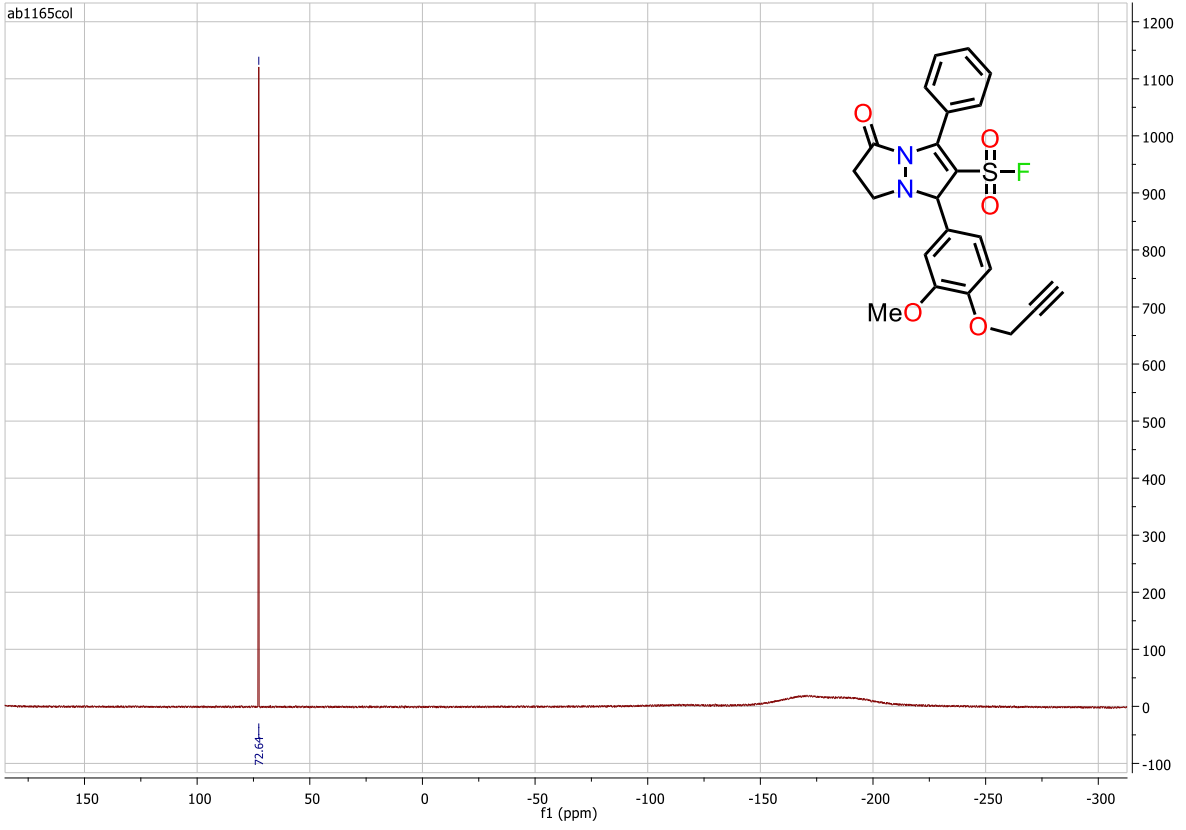

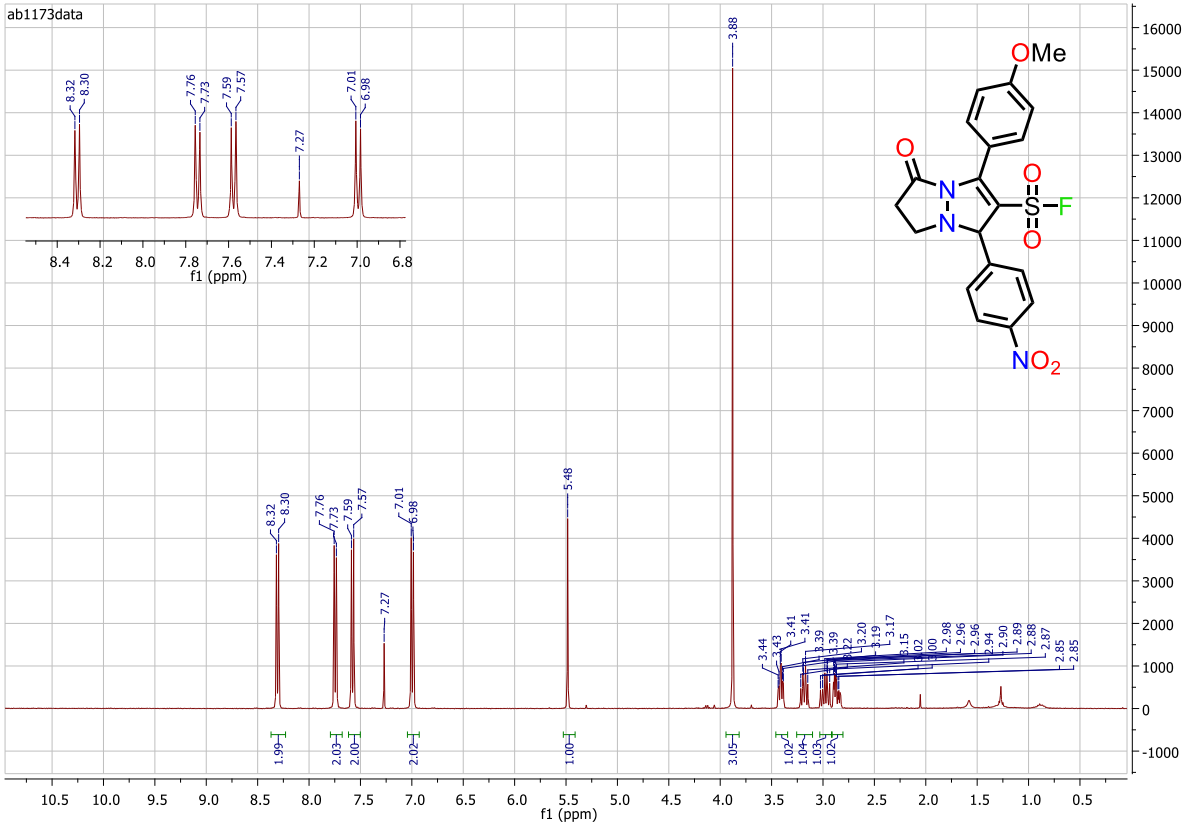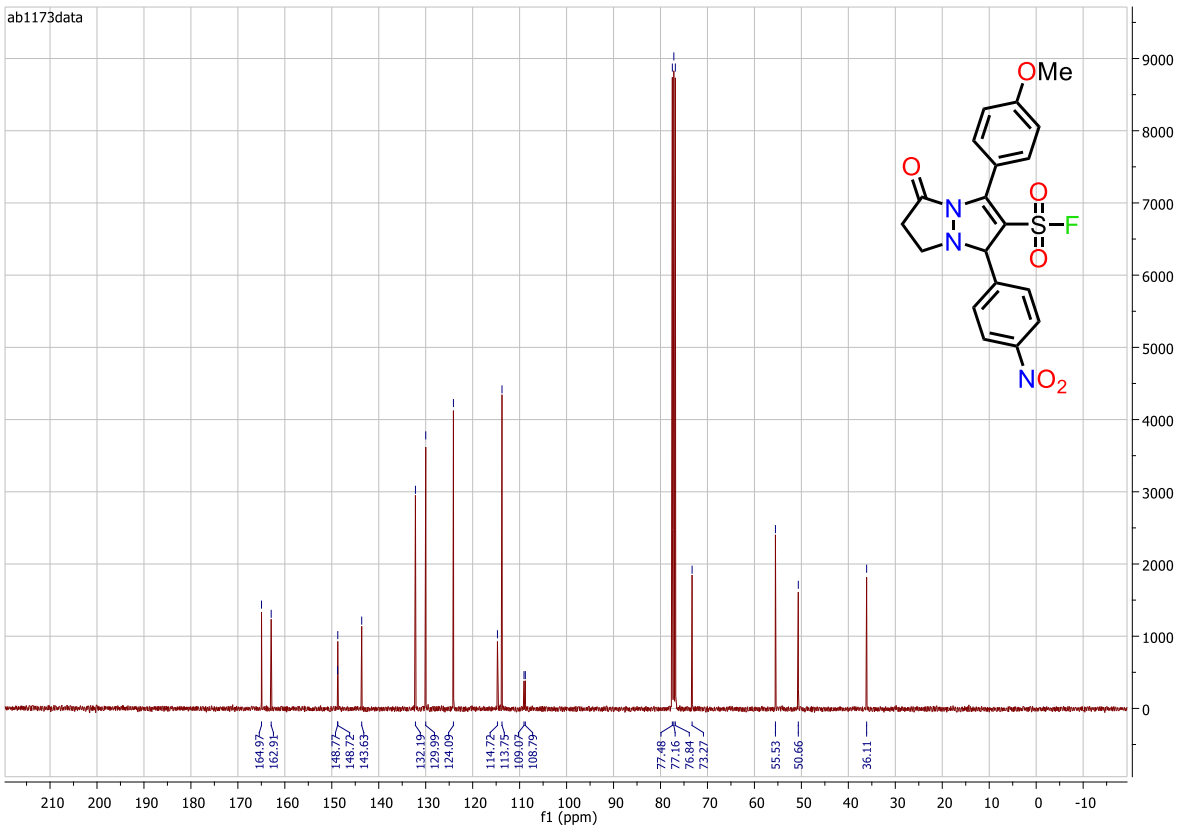



ab1173data

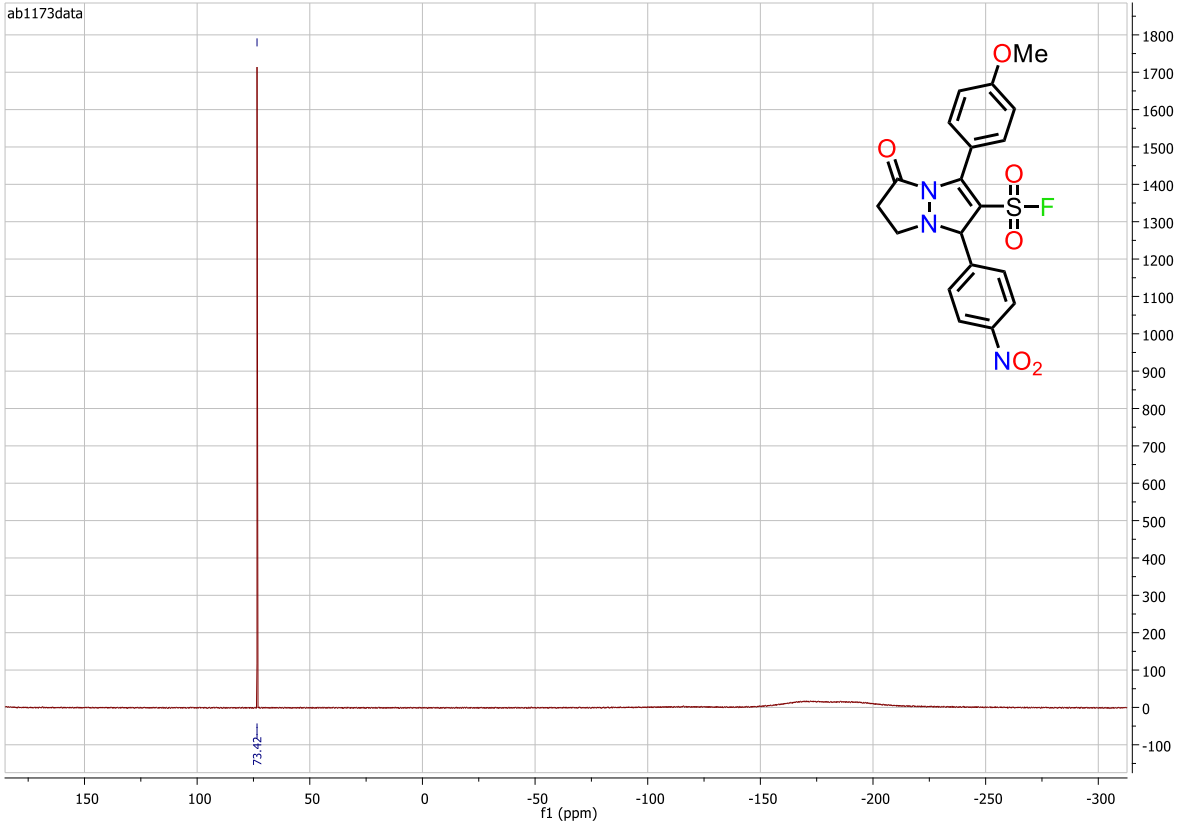

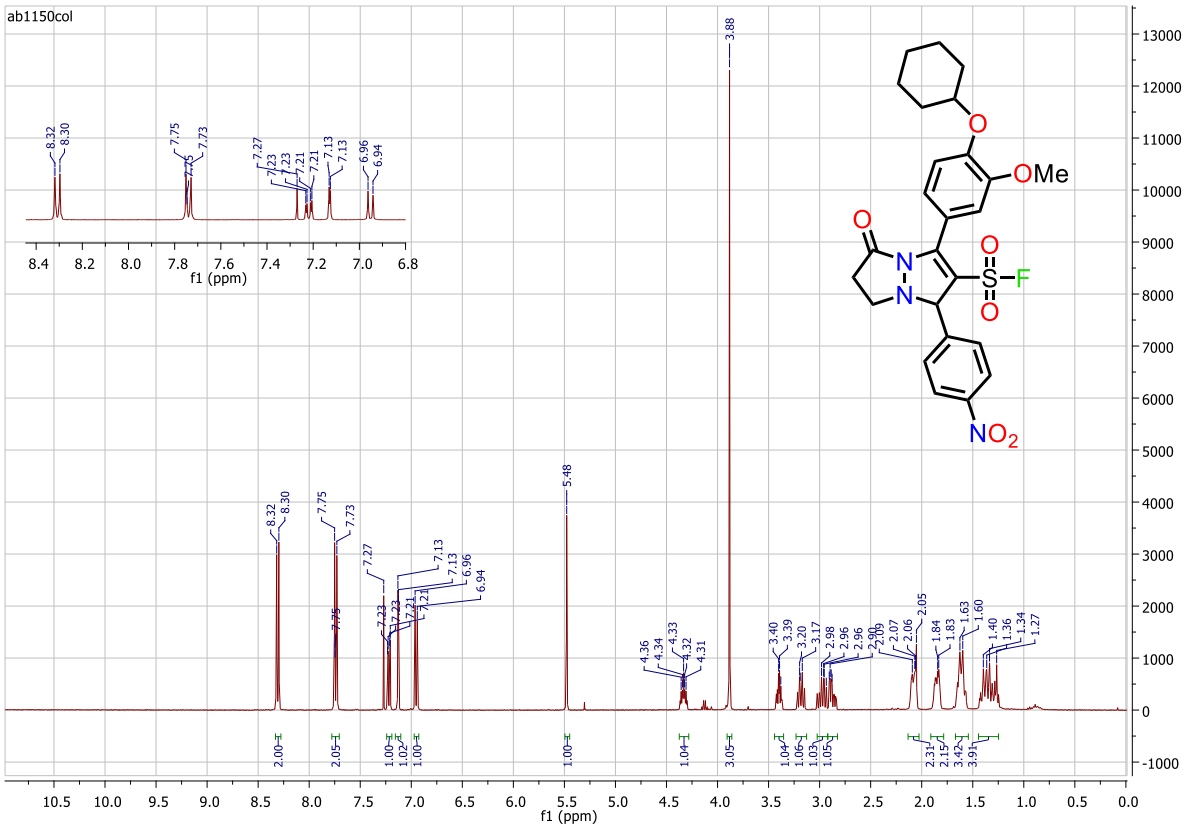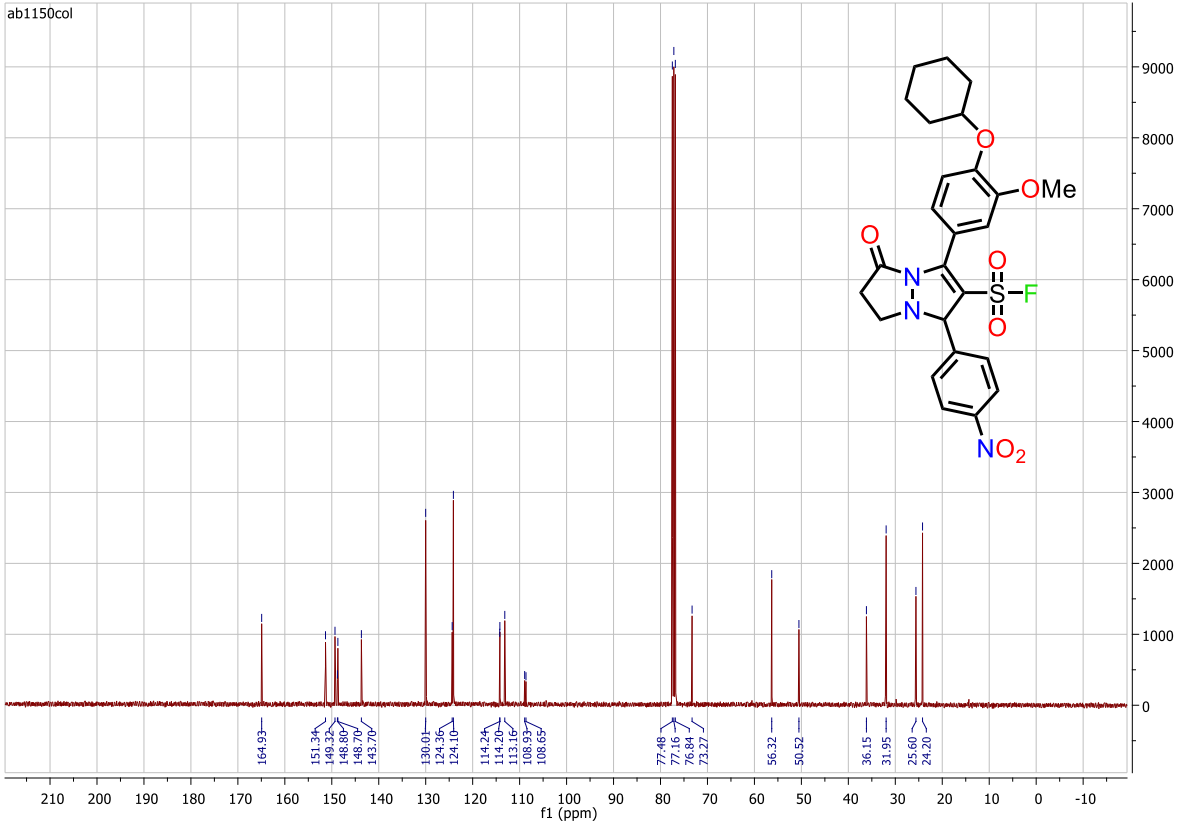

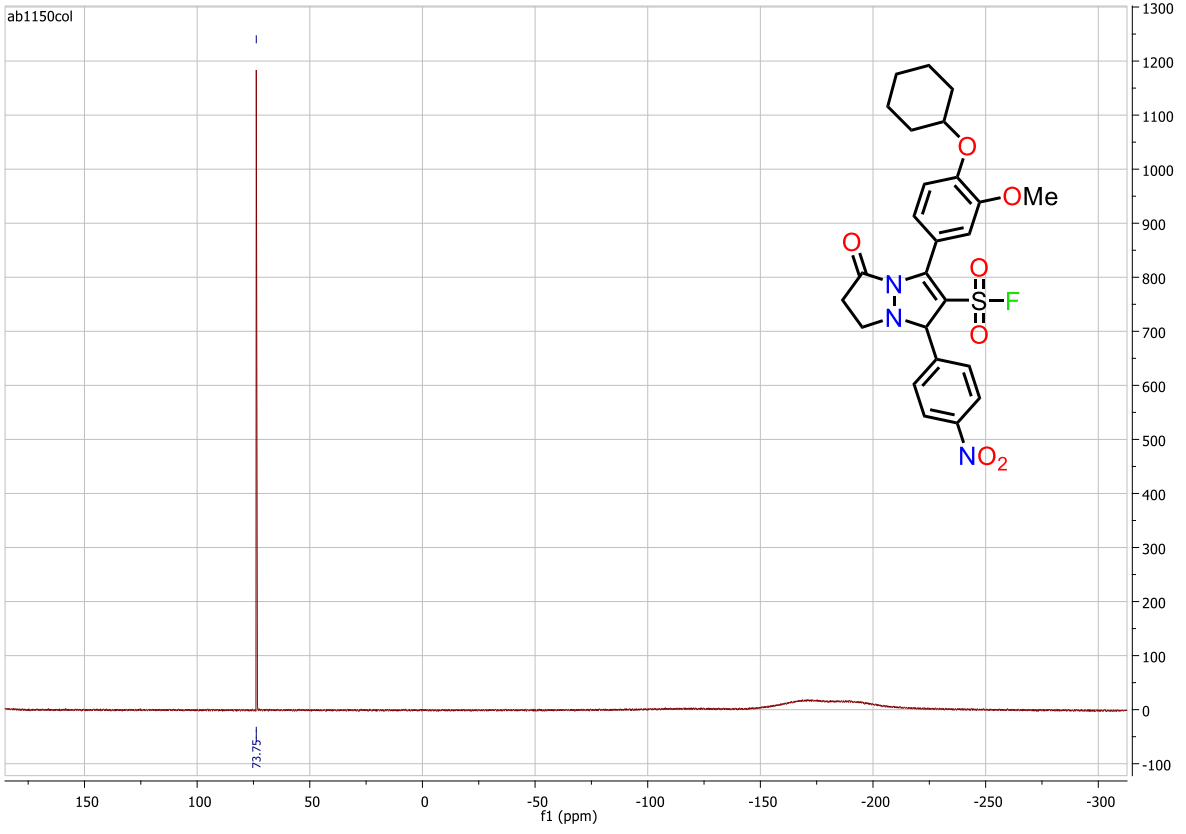

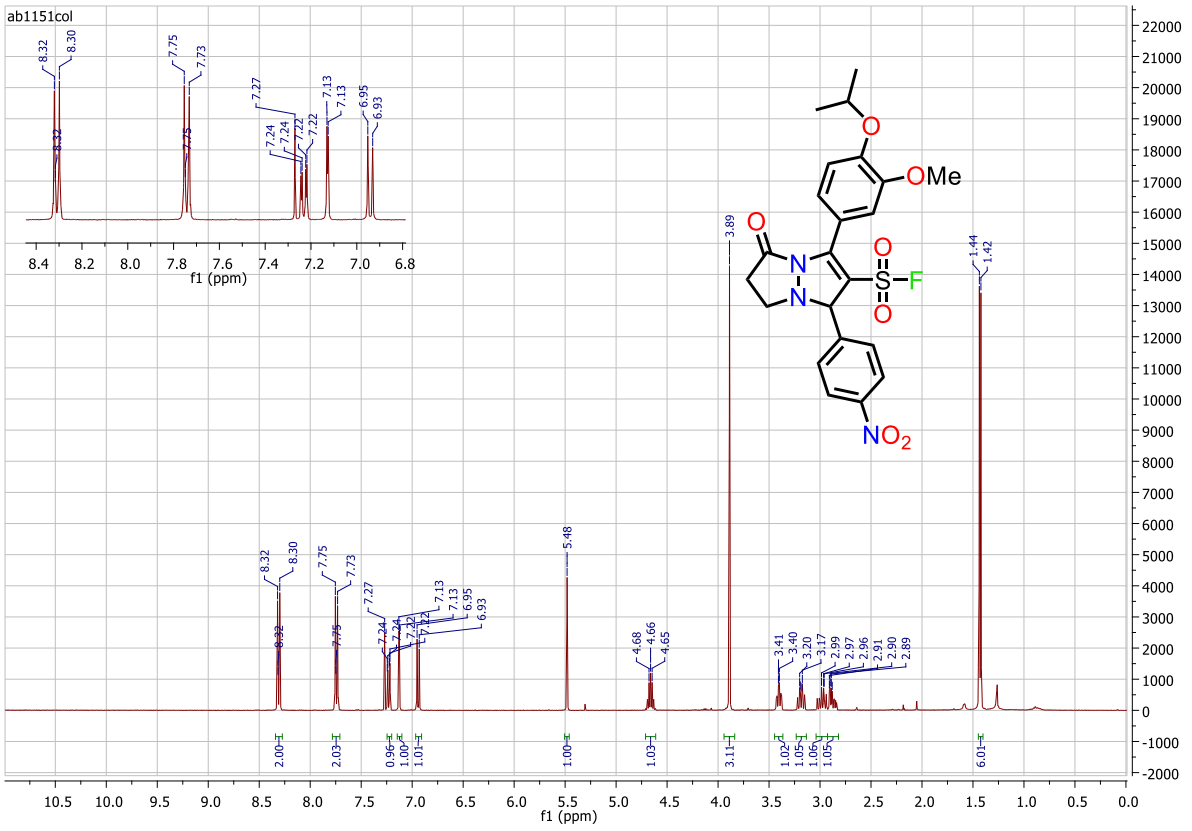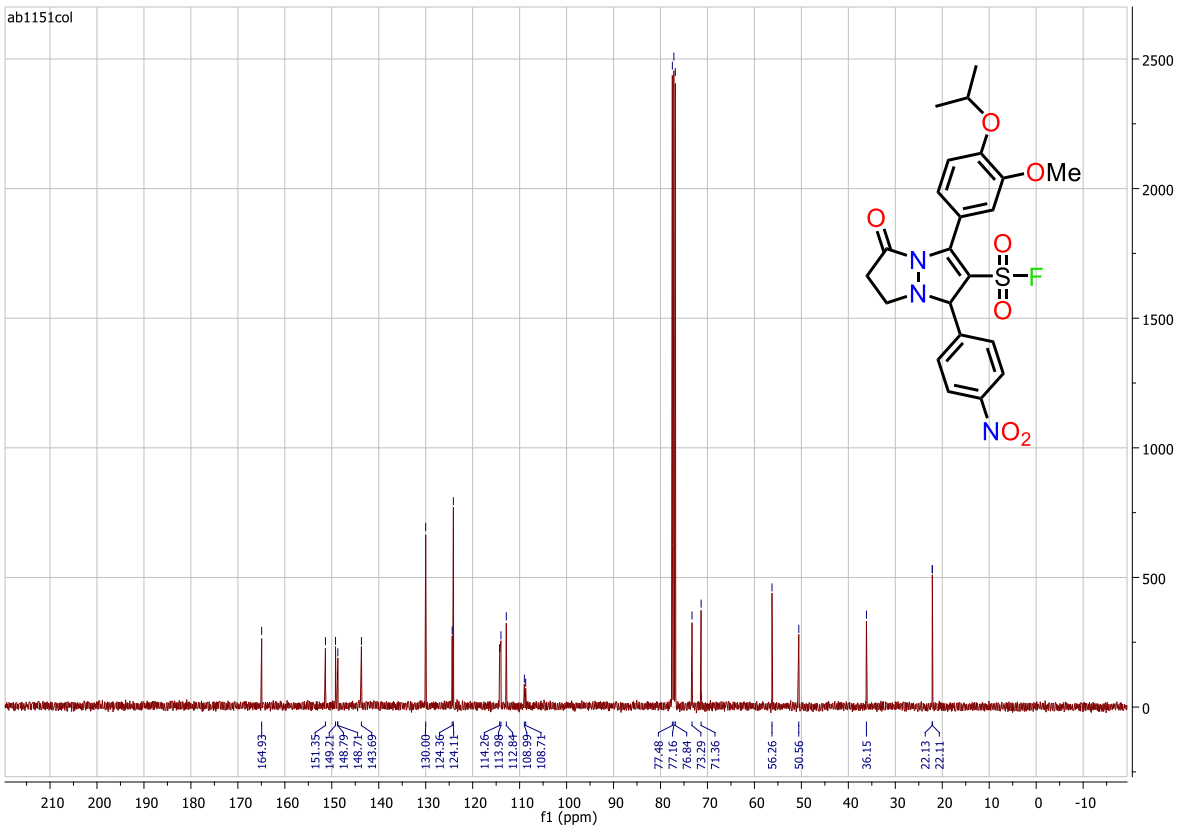

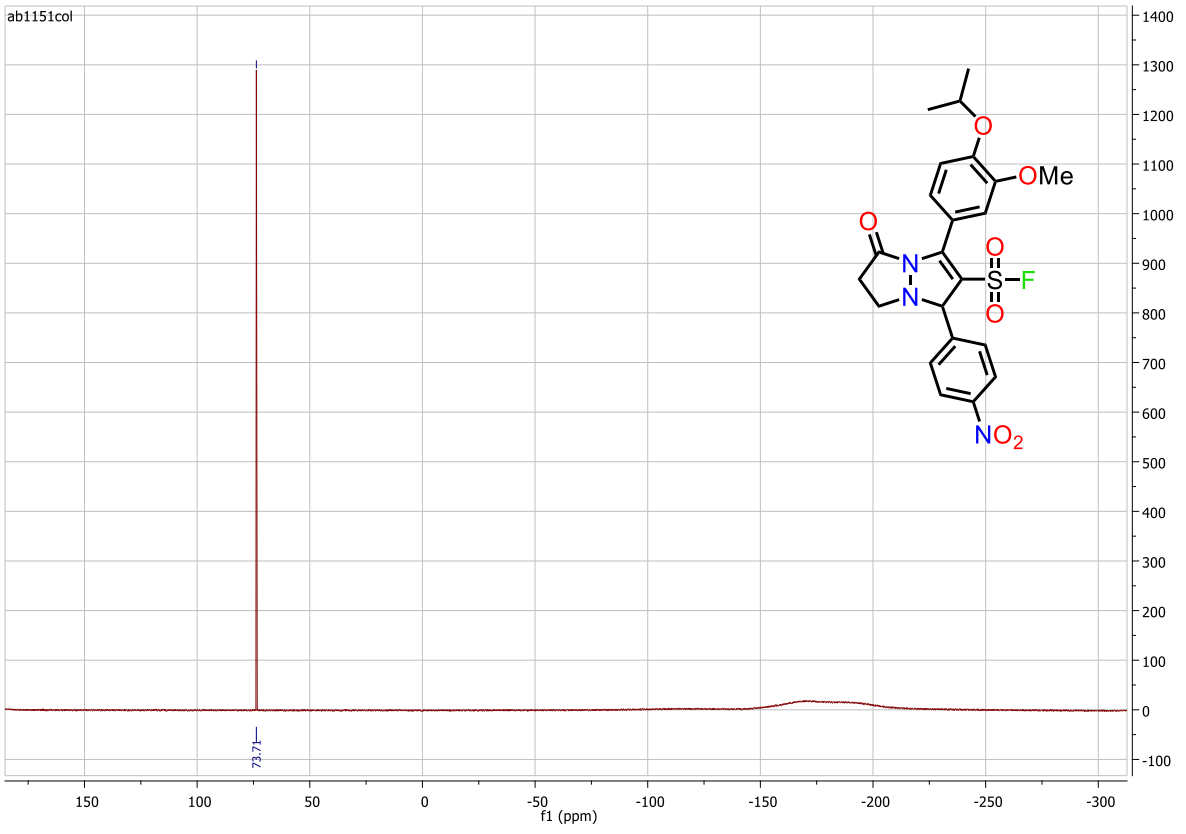

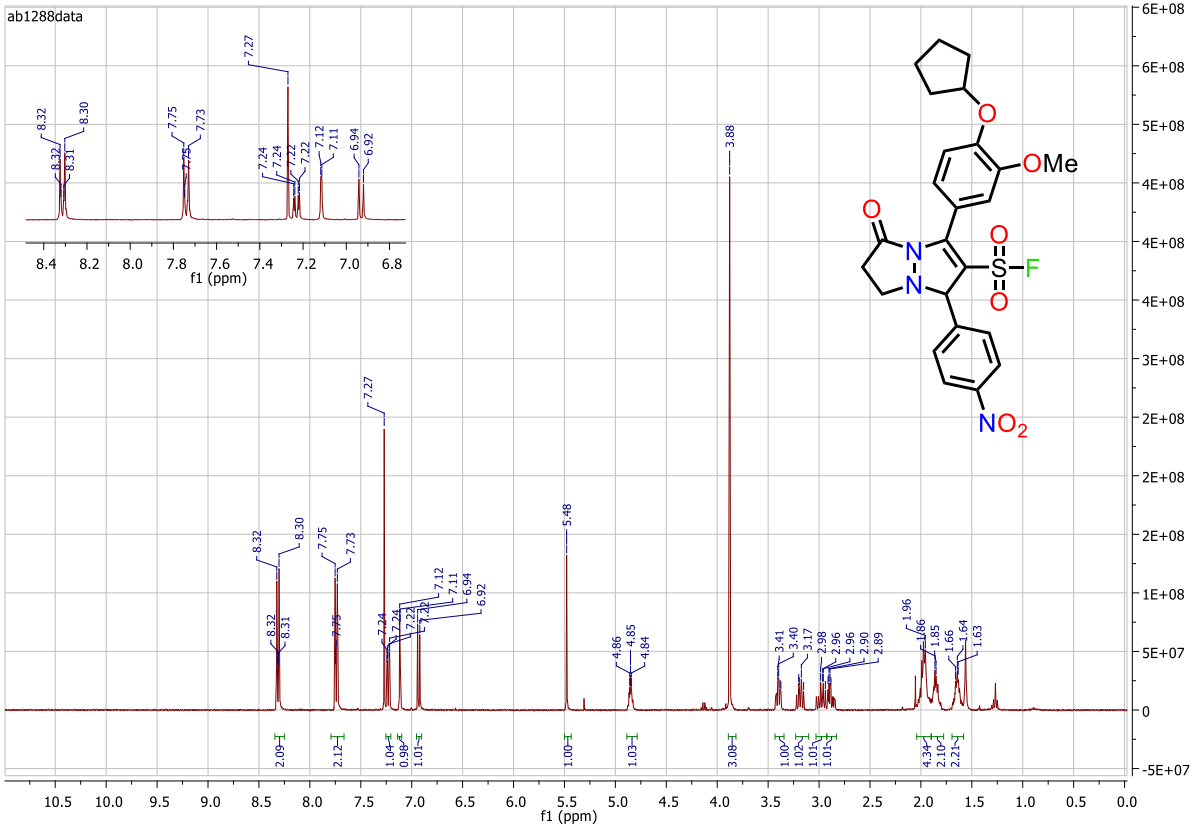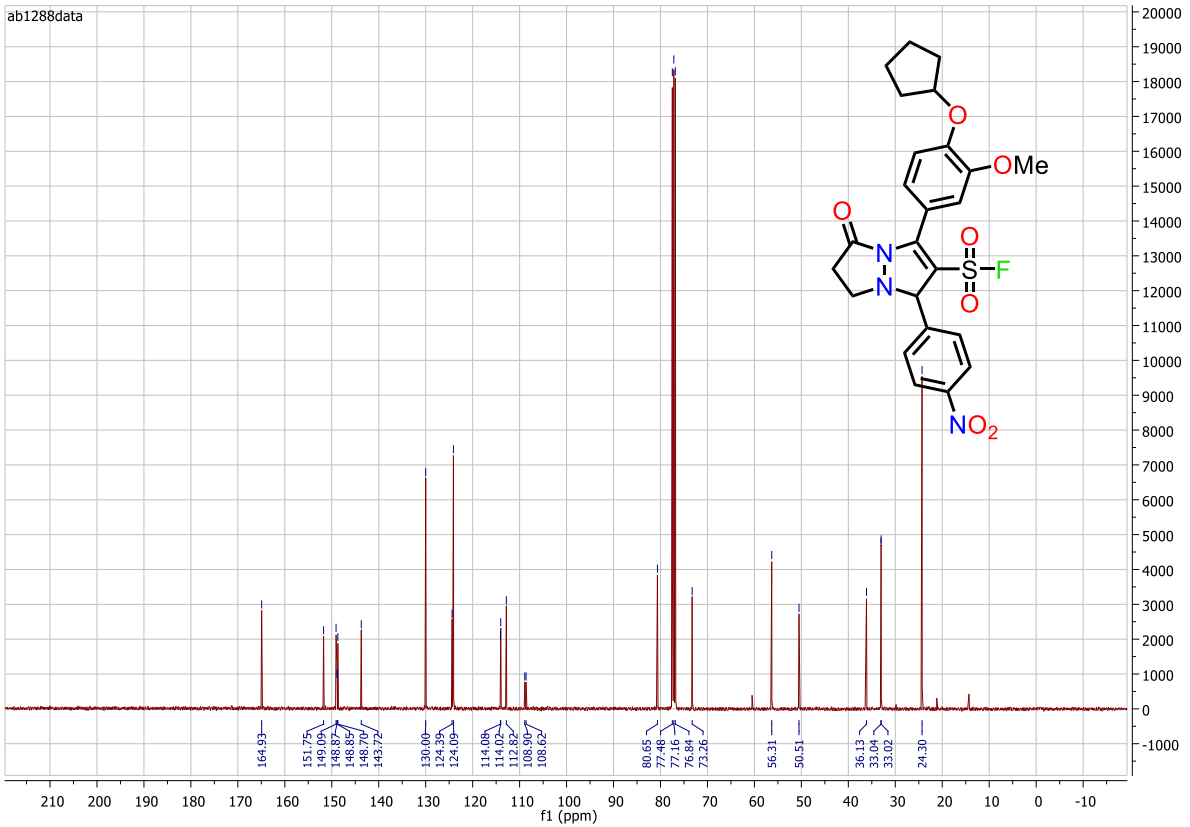

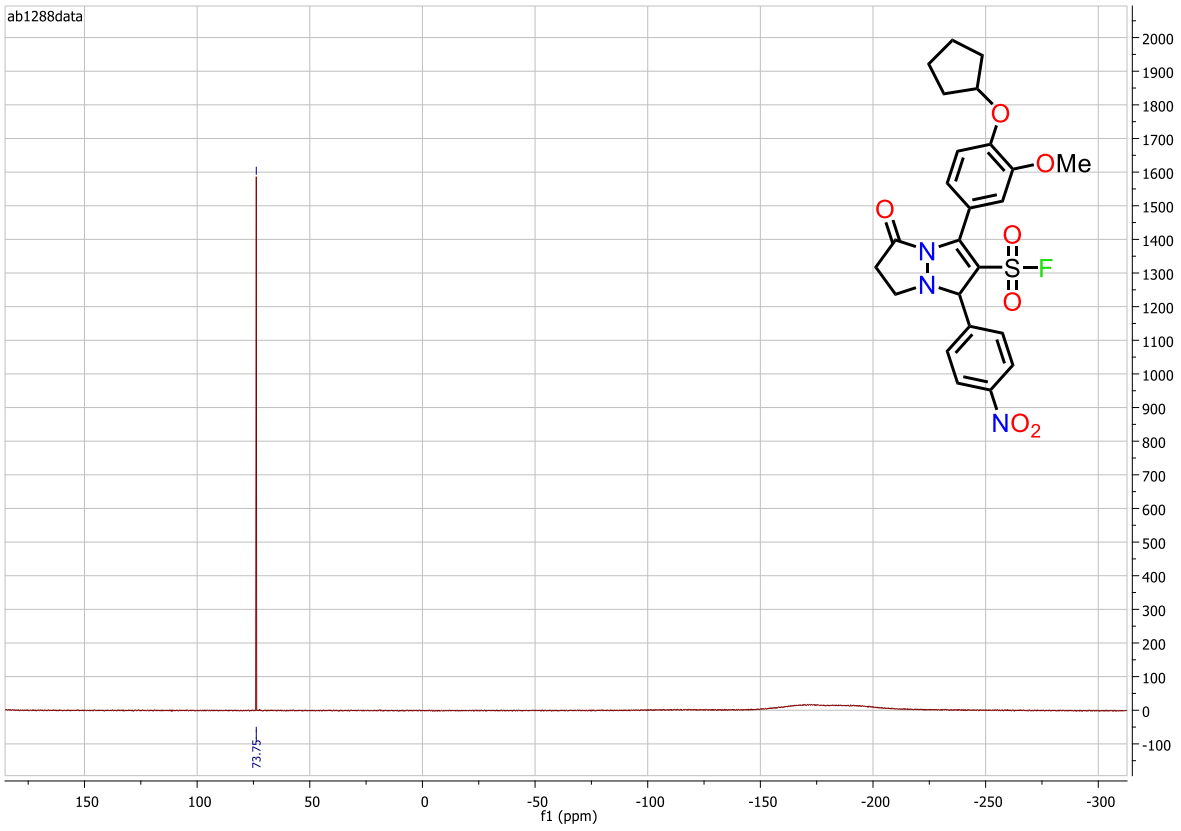

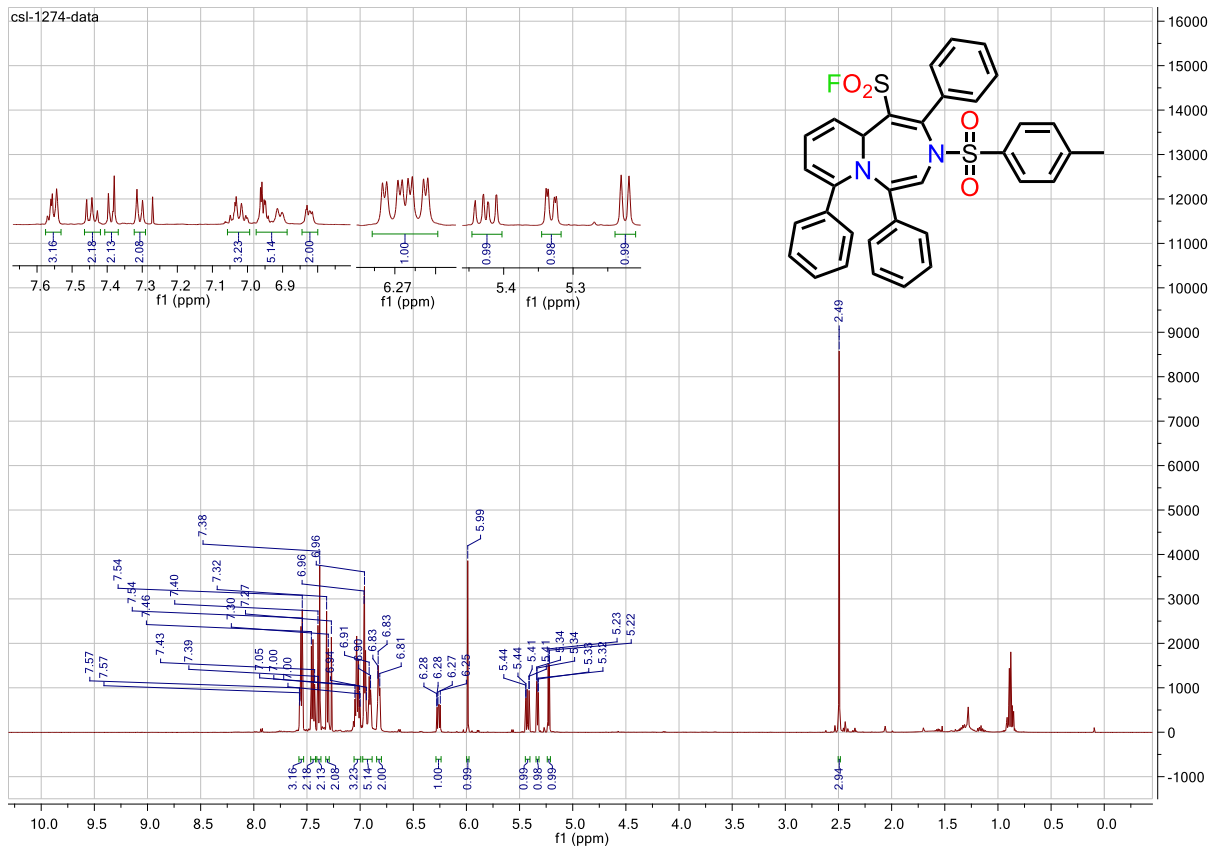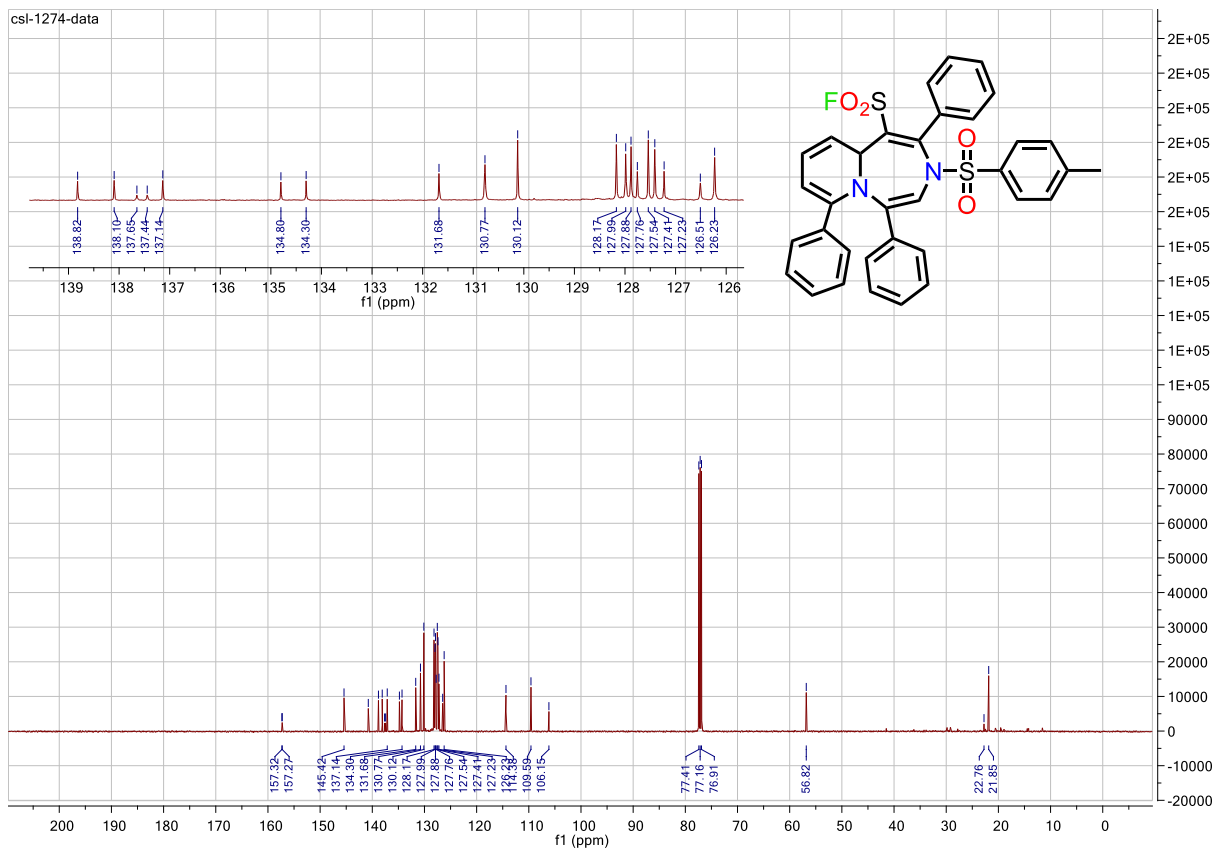



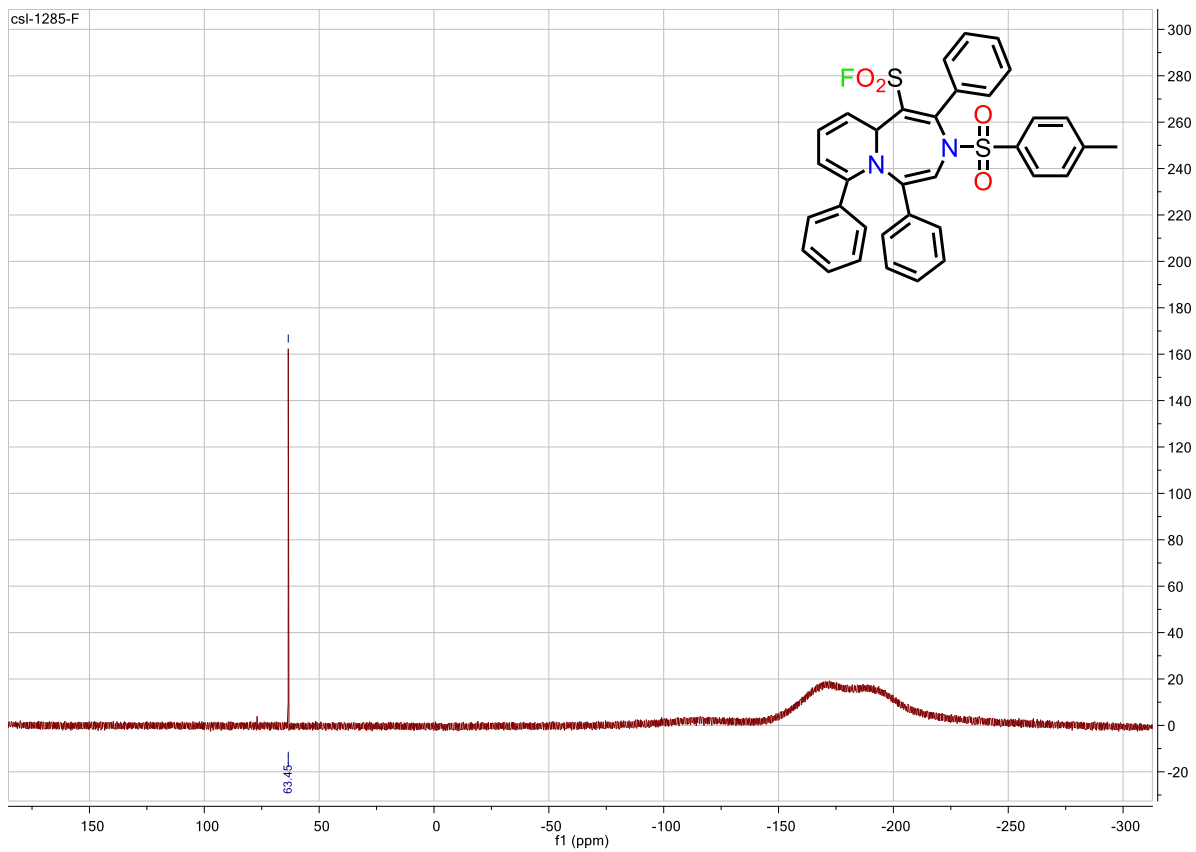

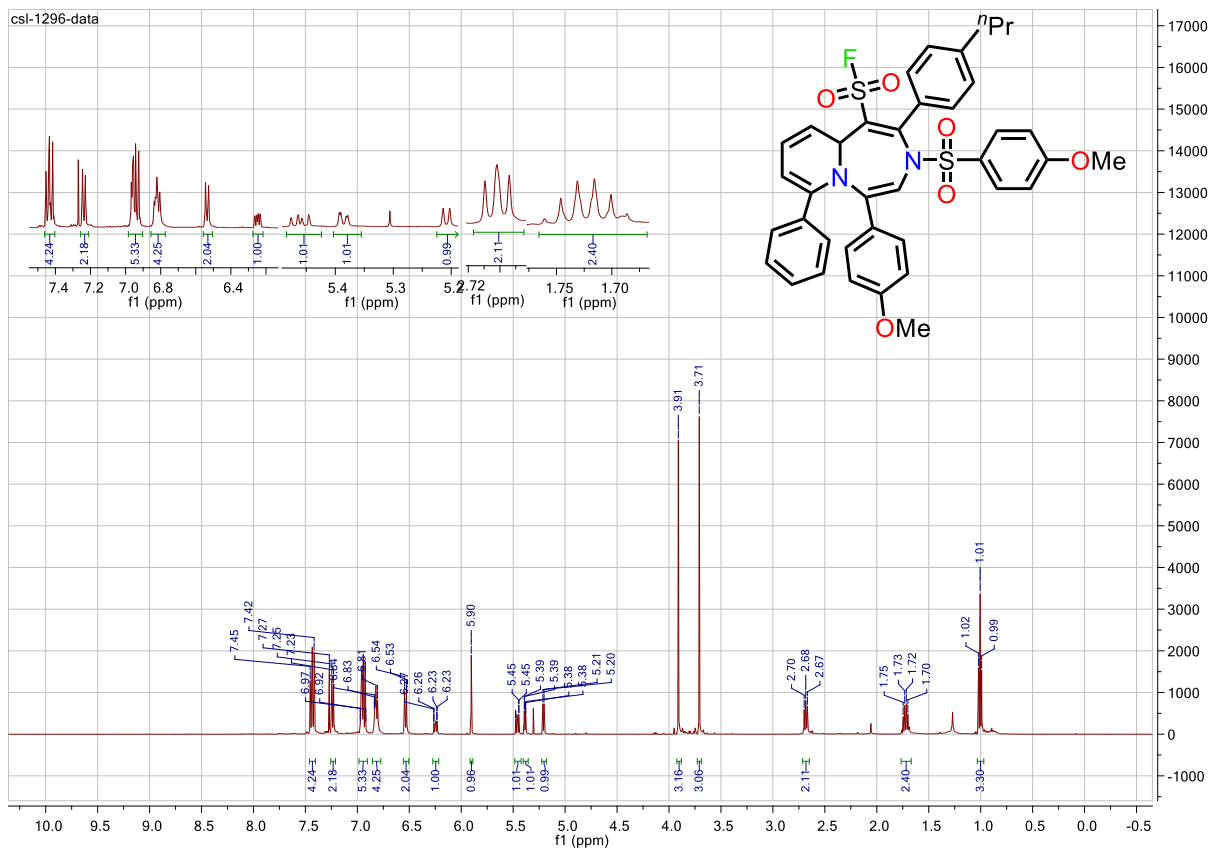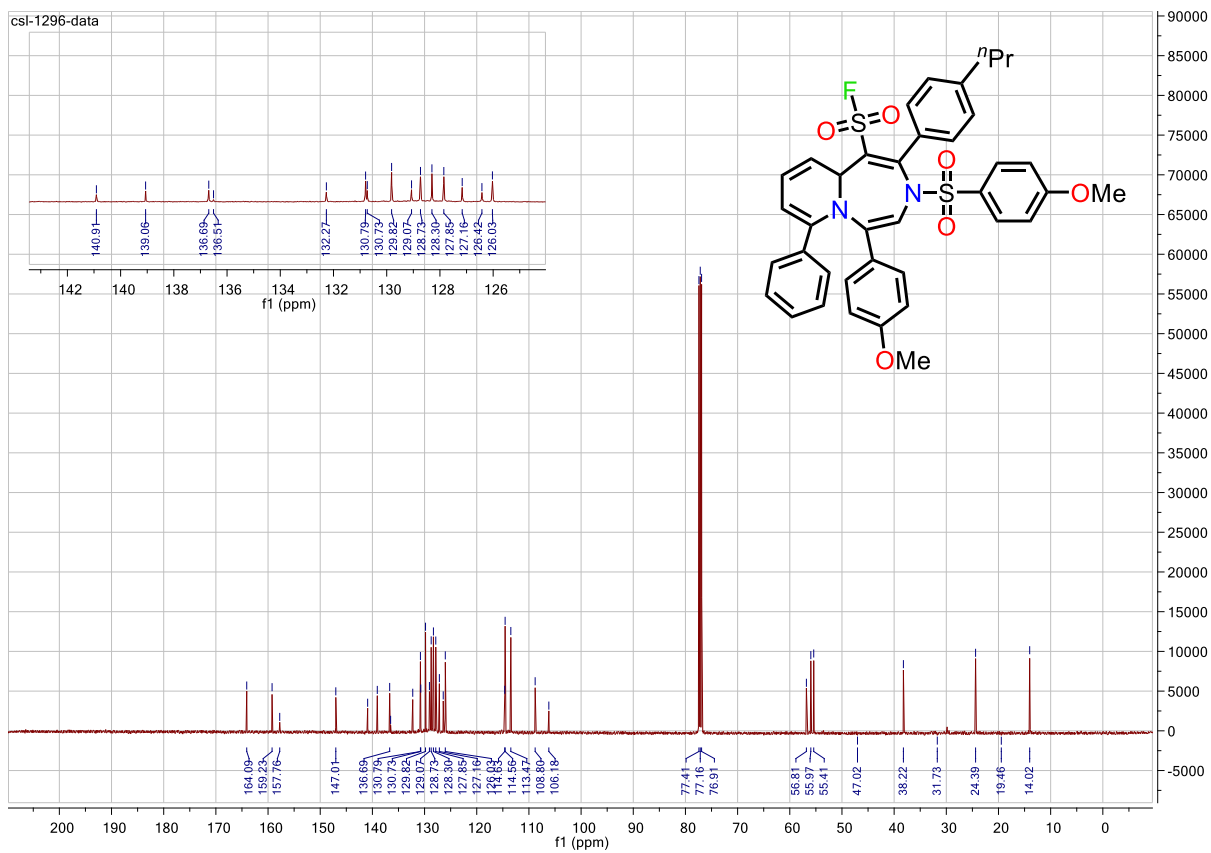

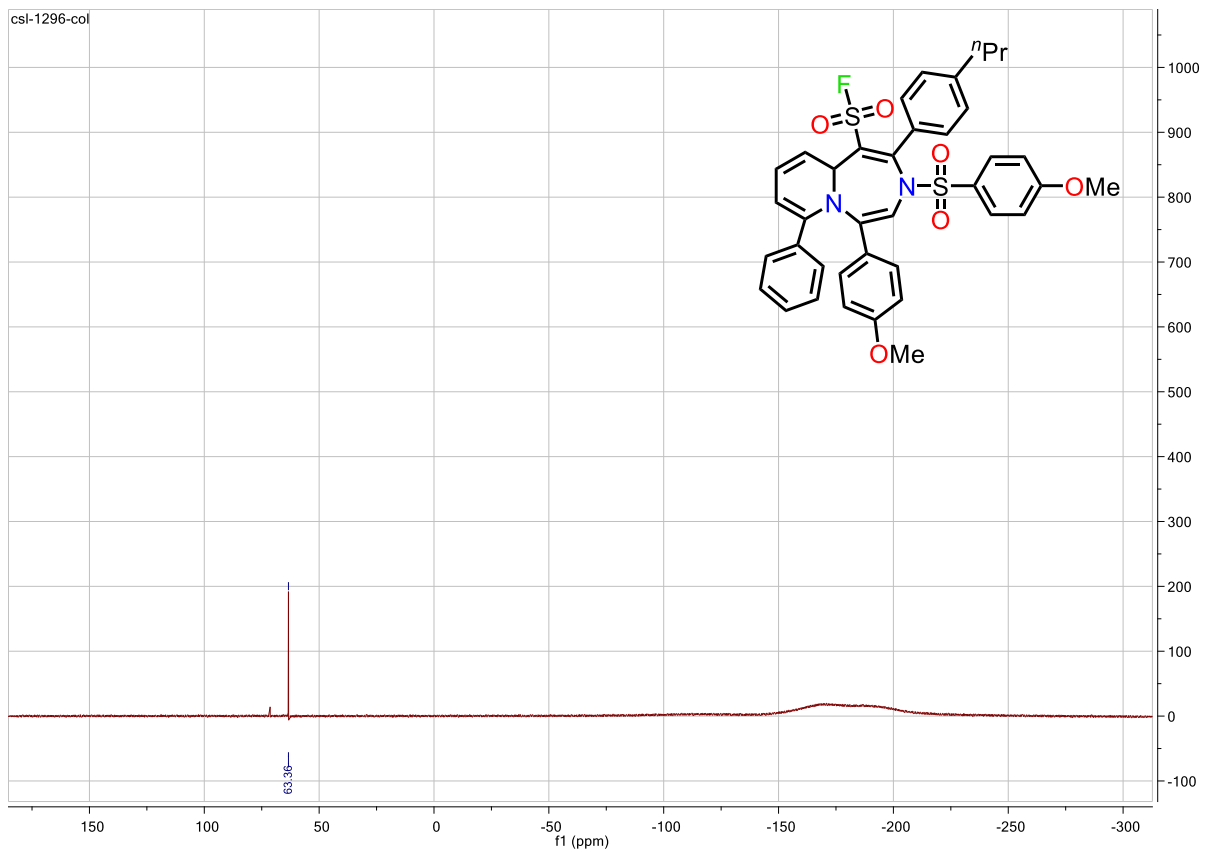

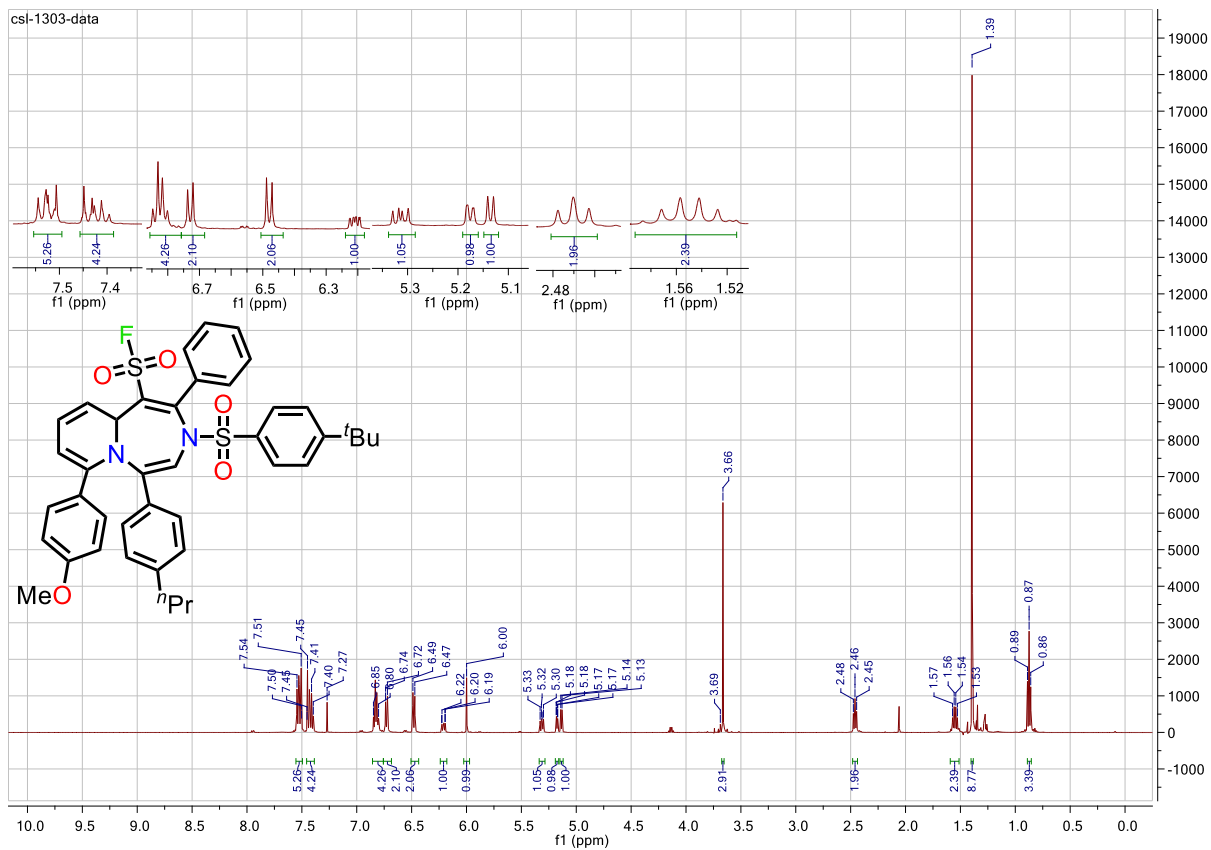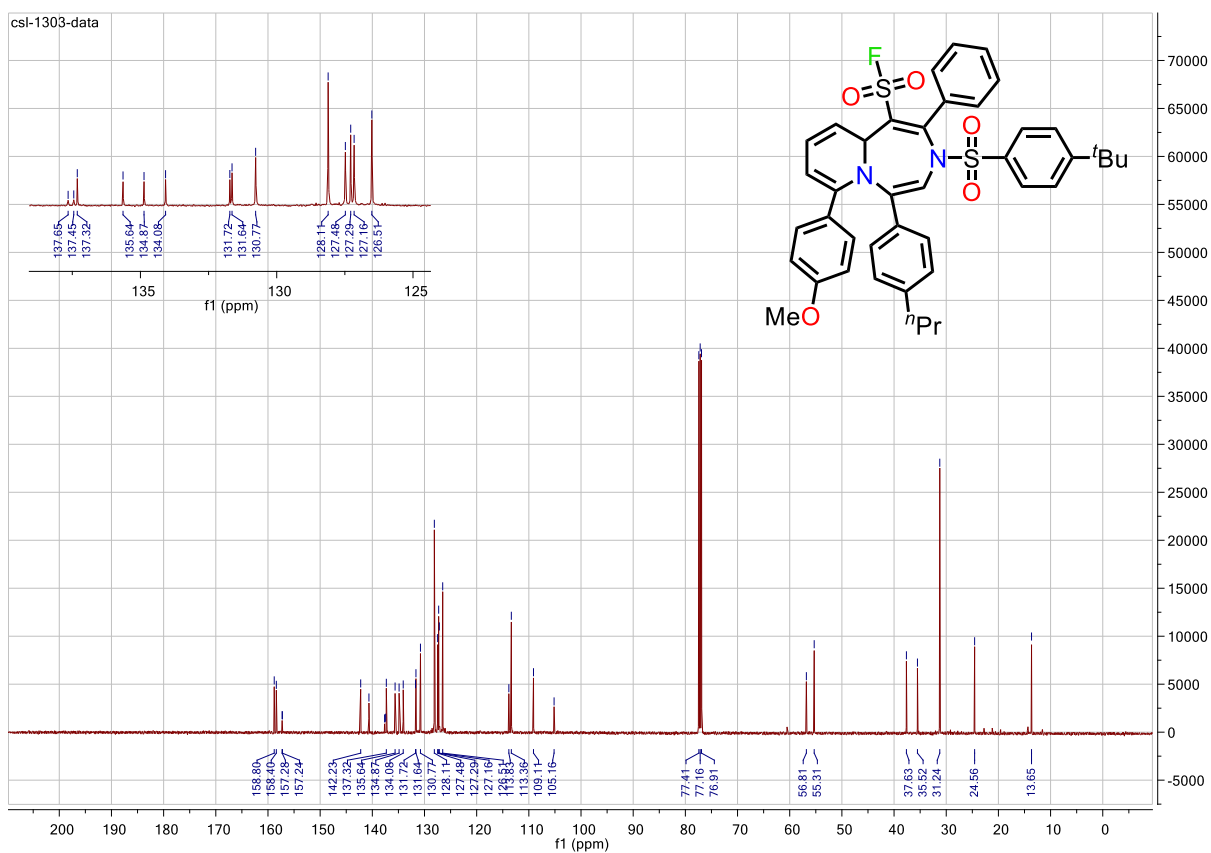

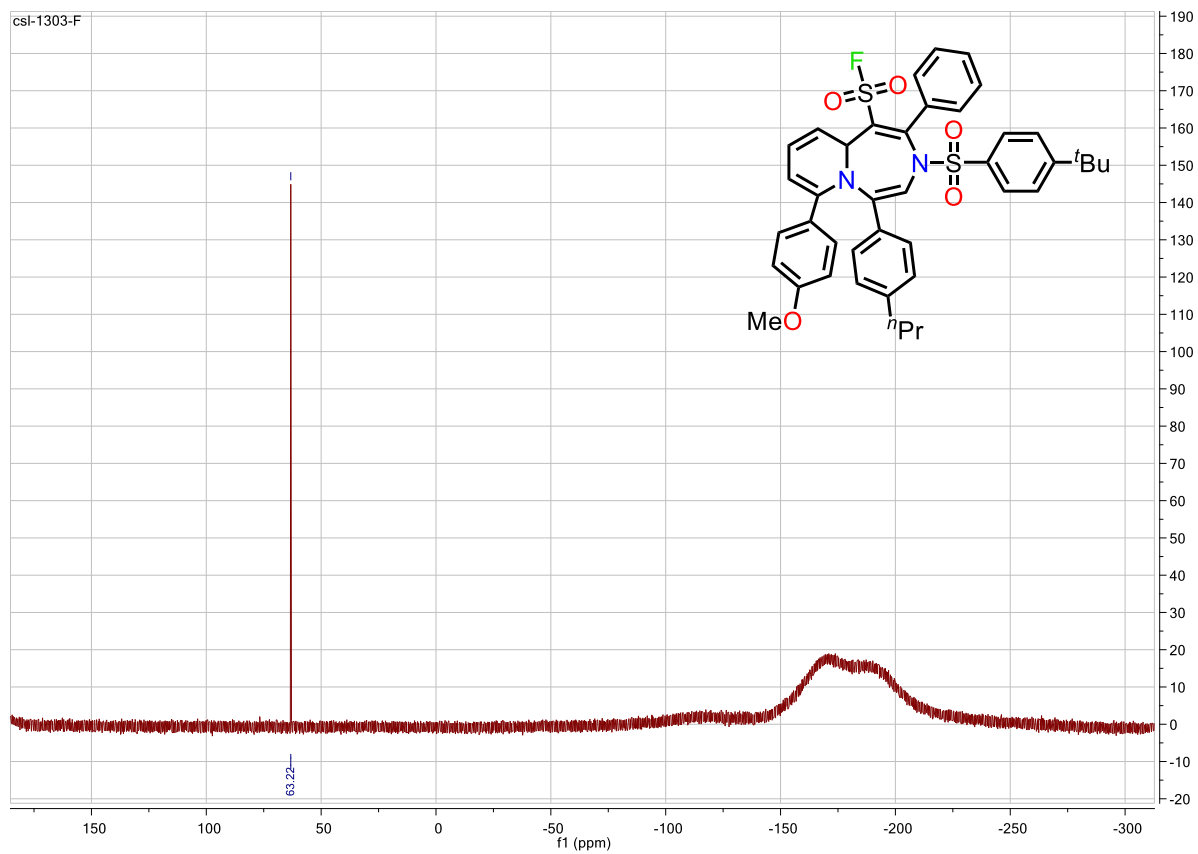

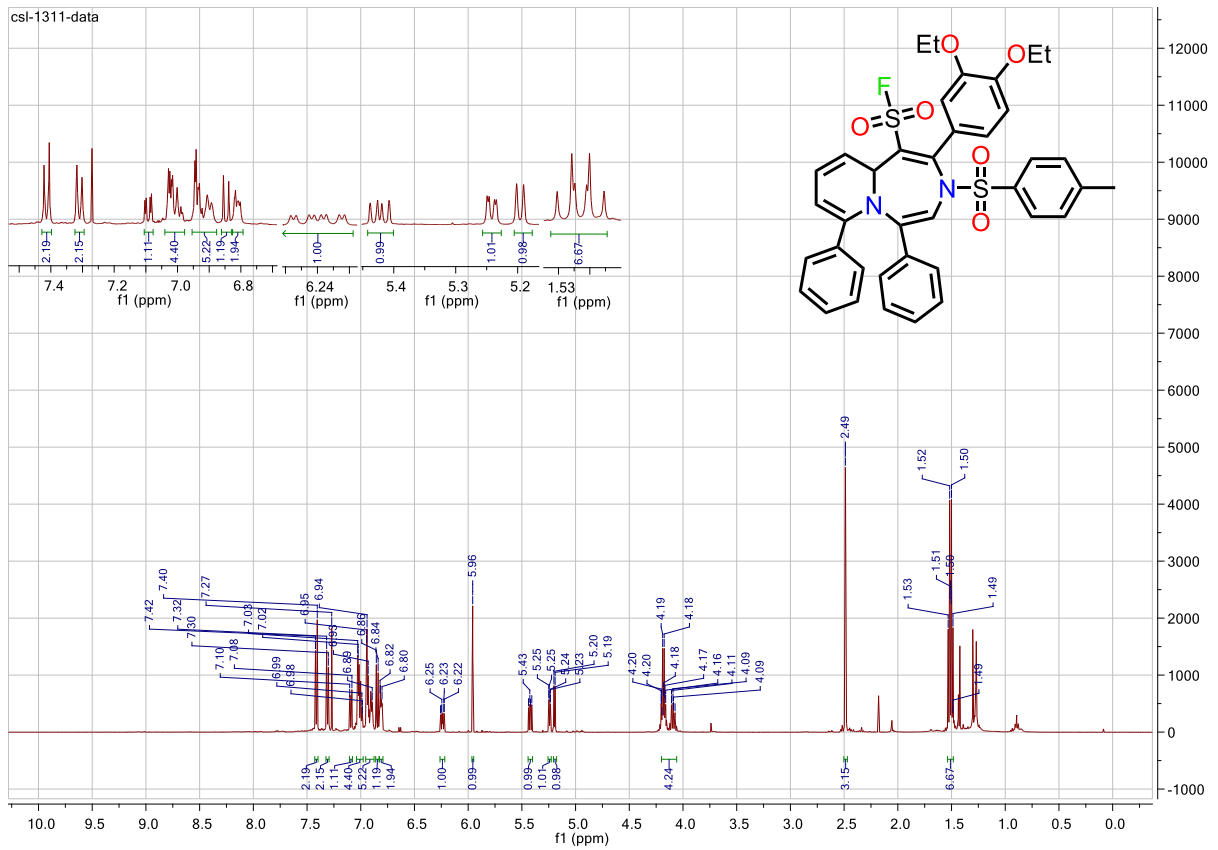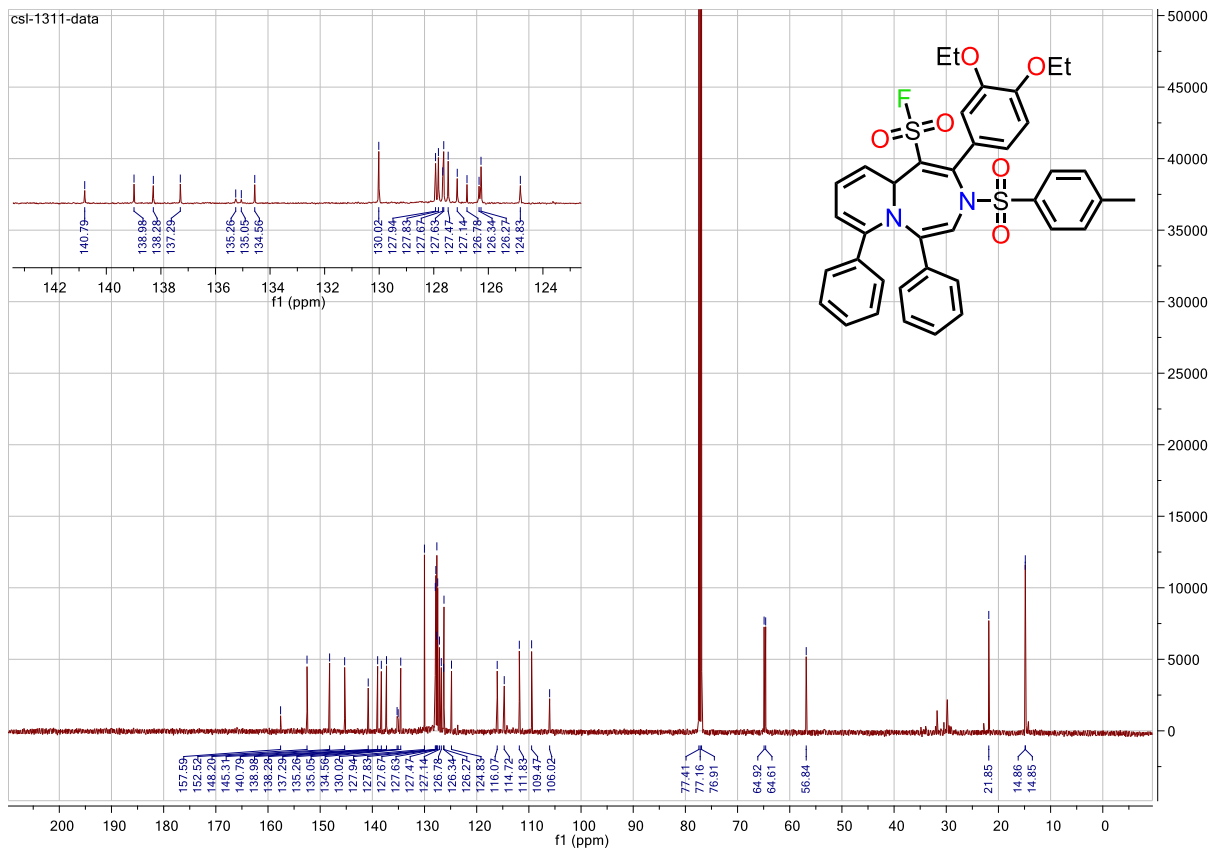

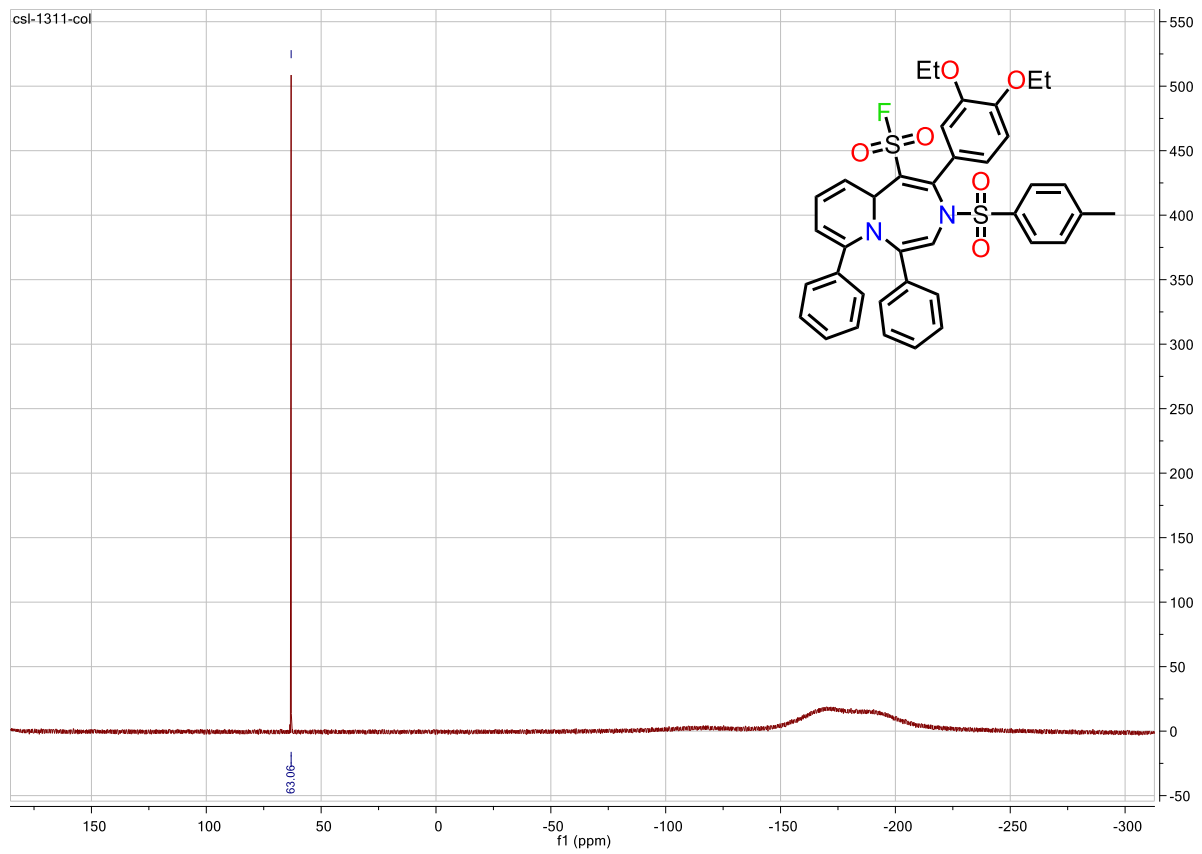

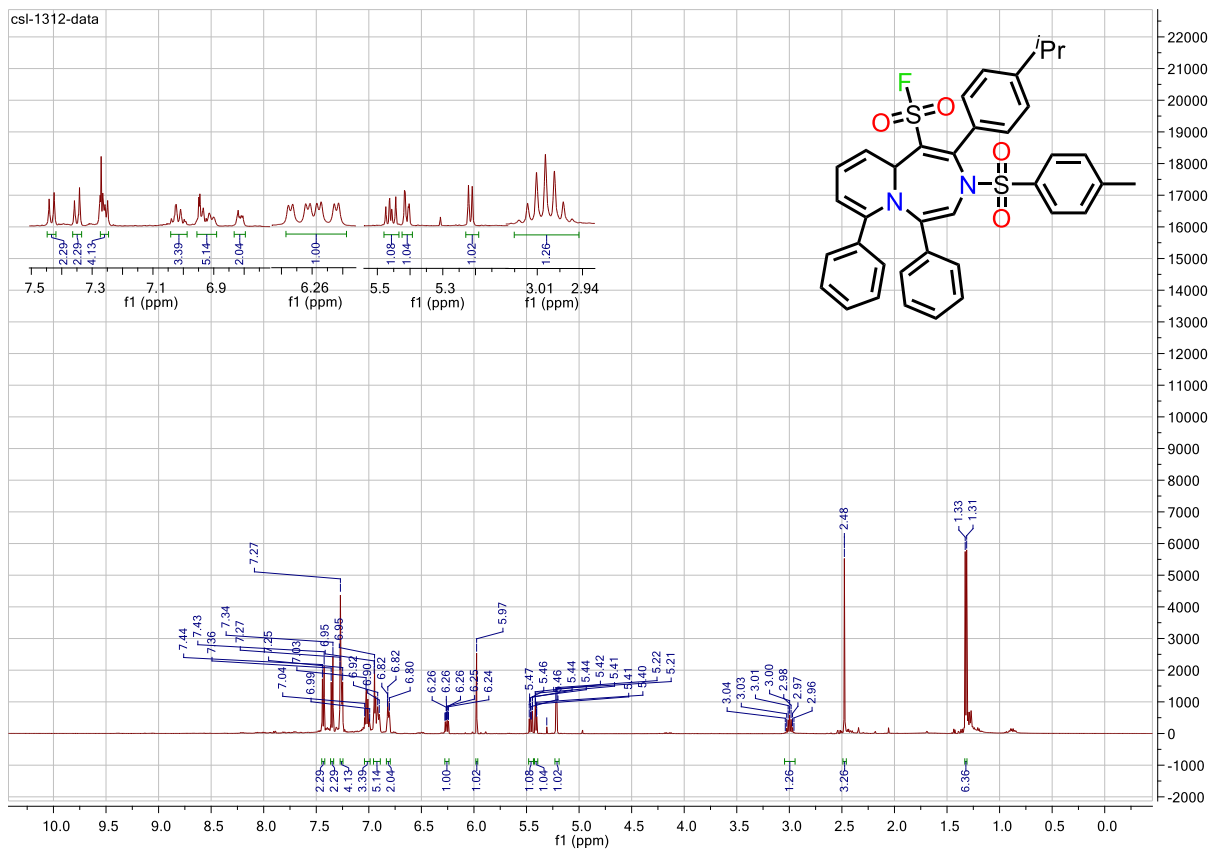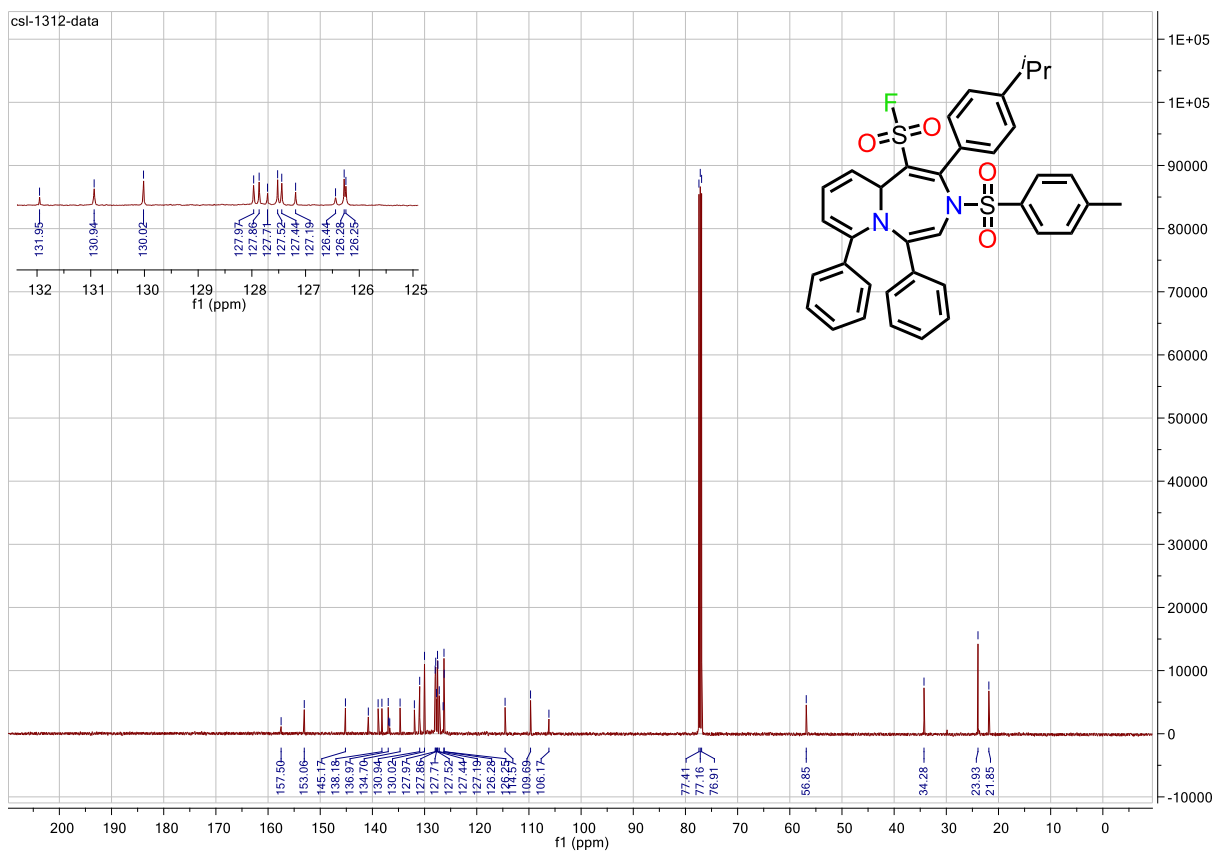



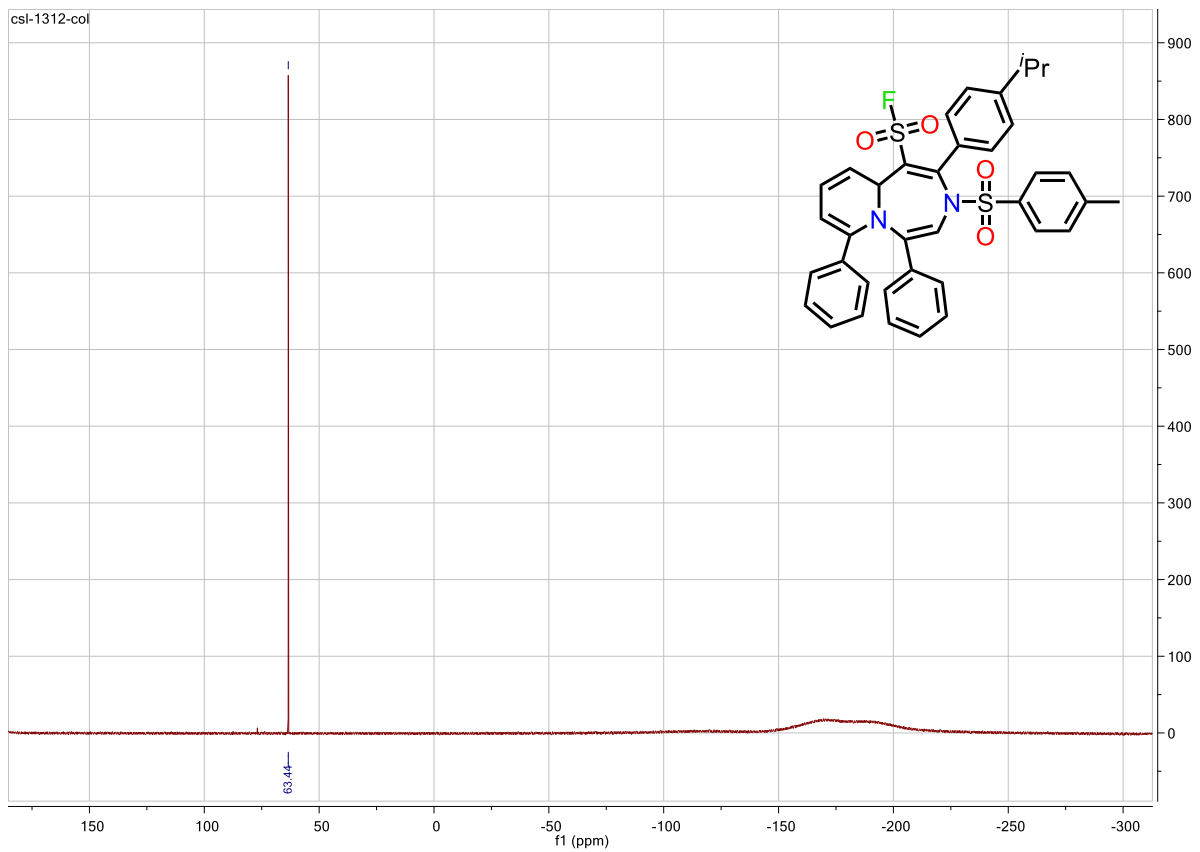

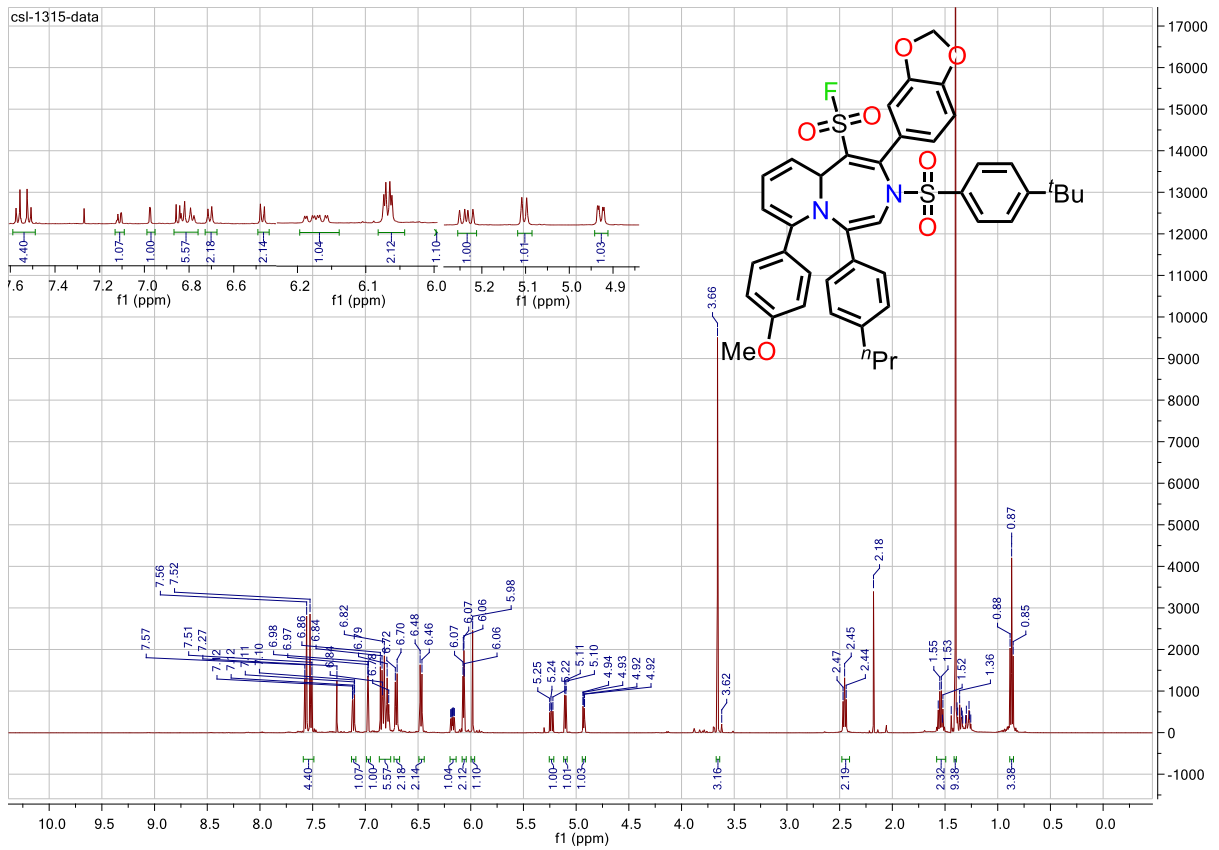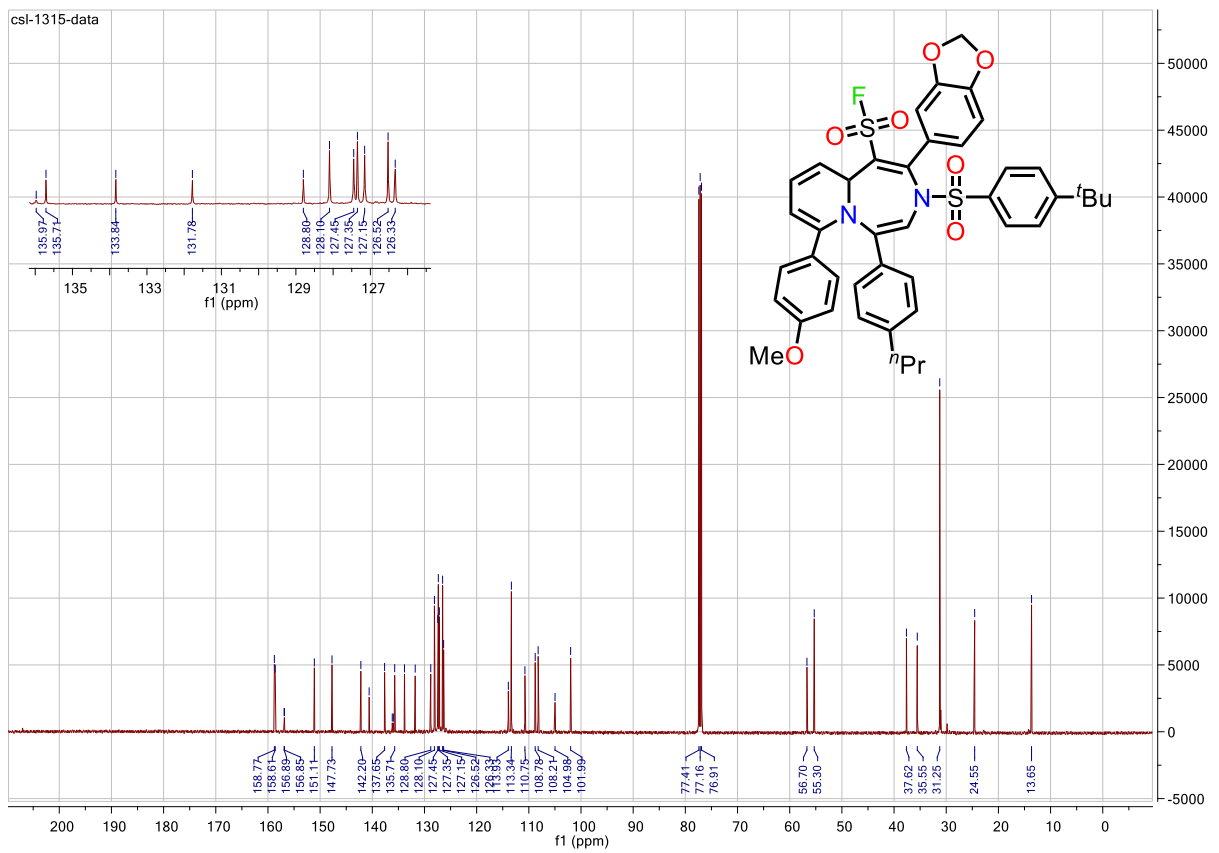

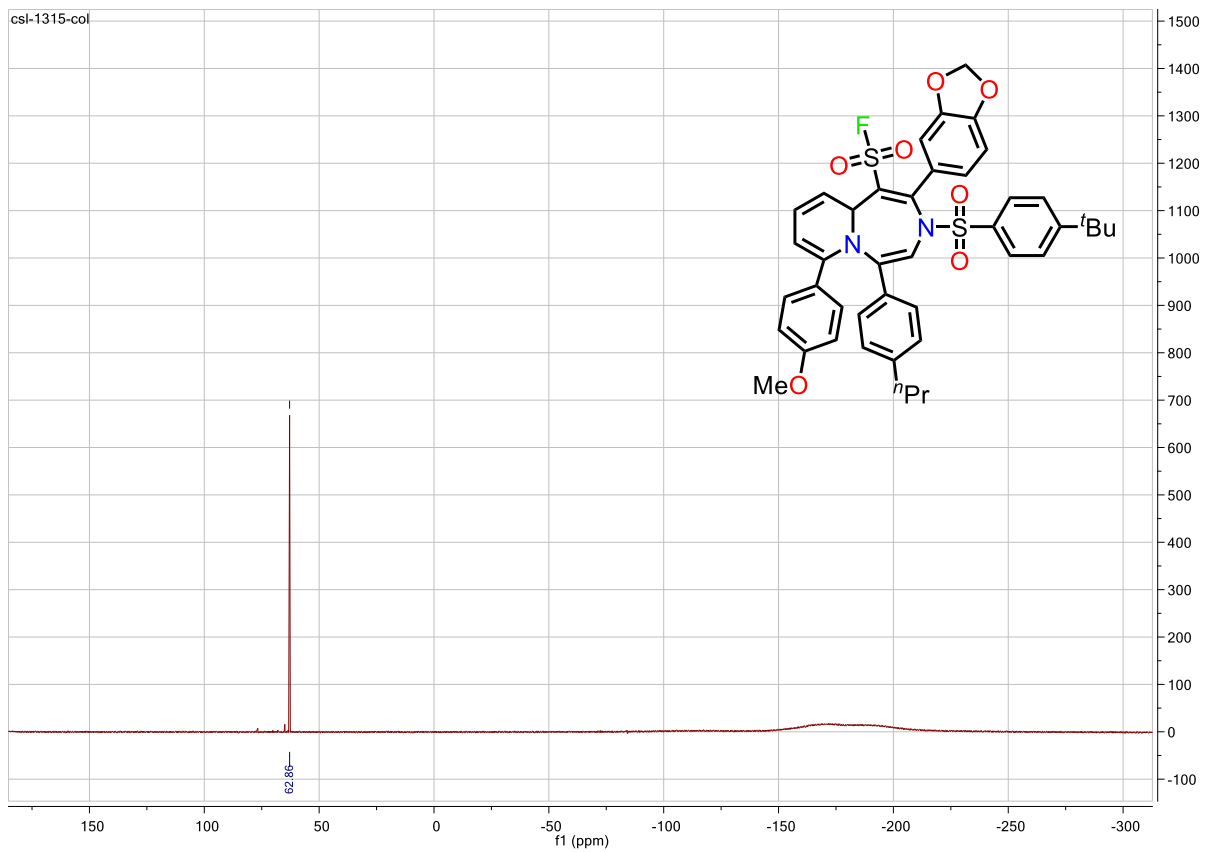

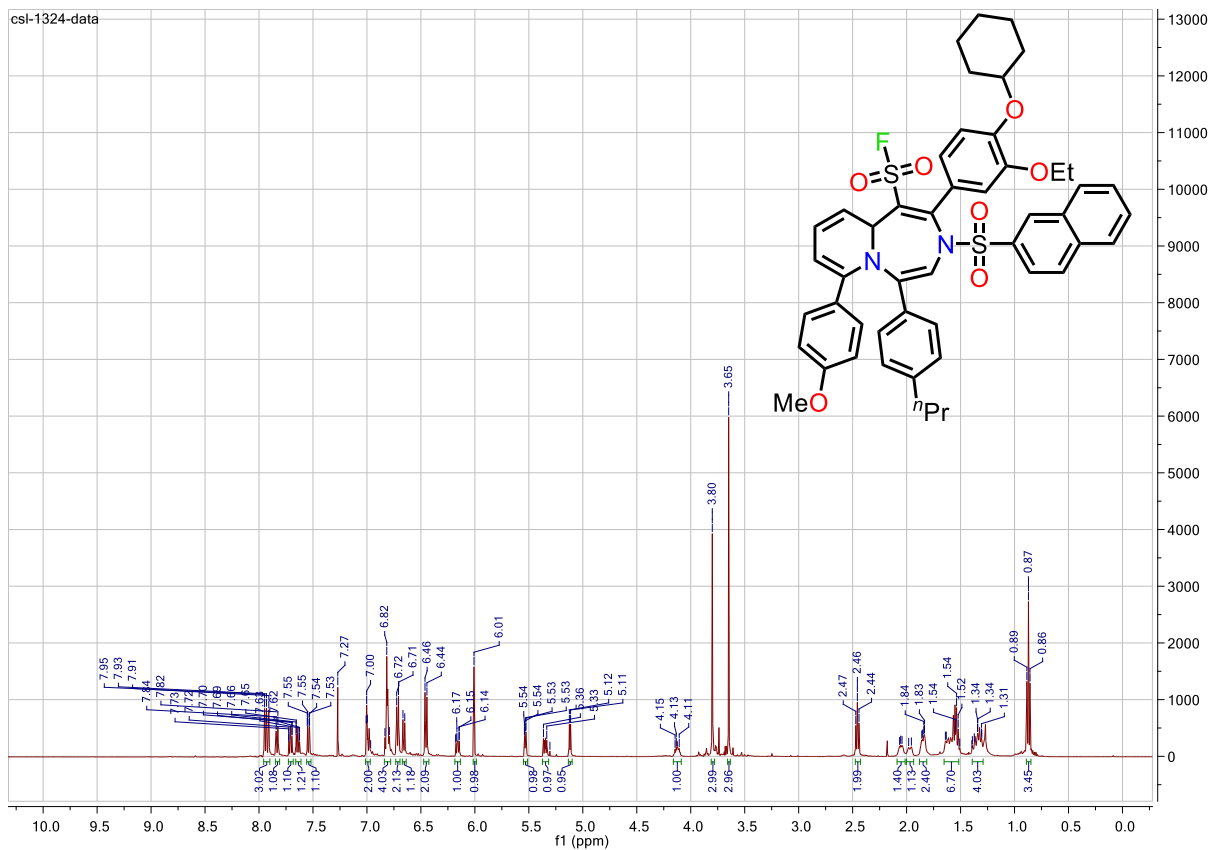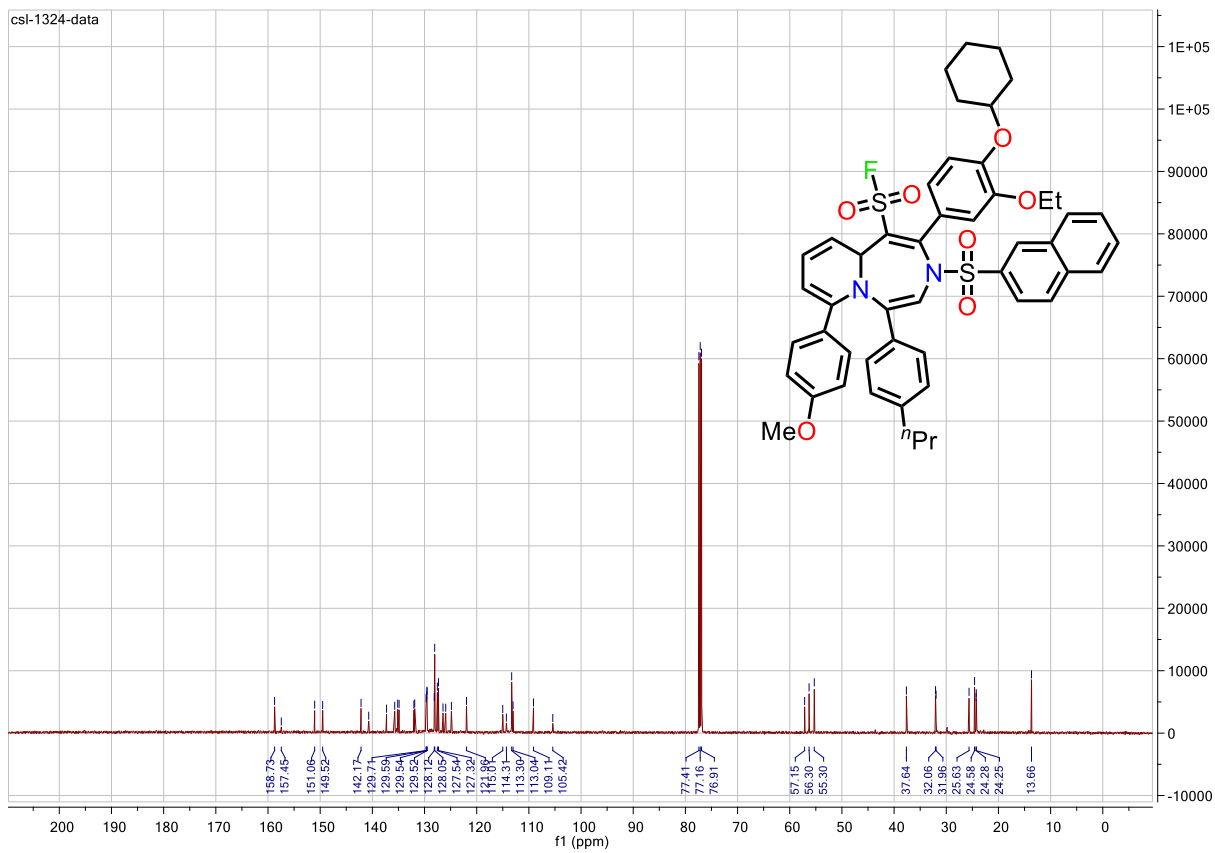

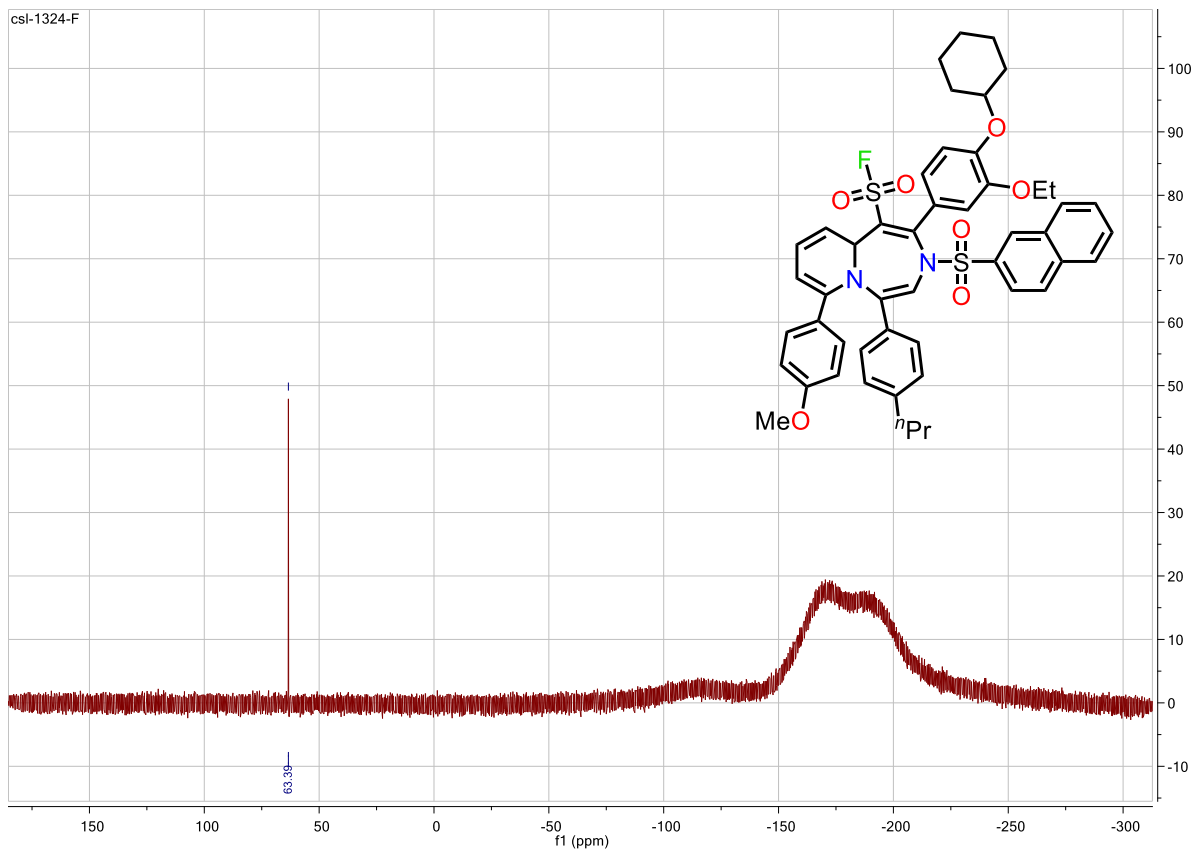

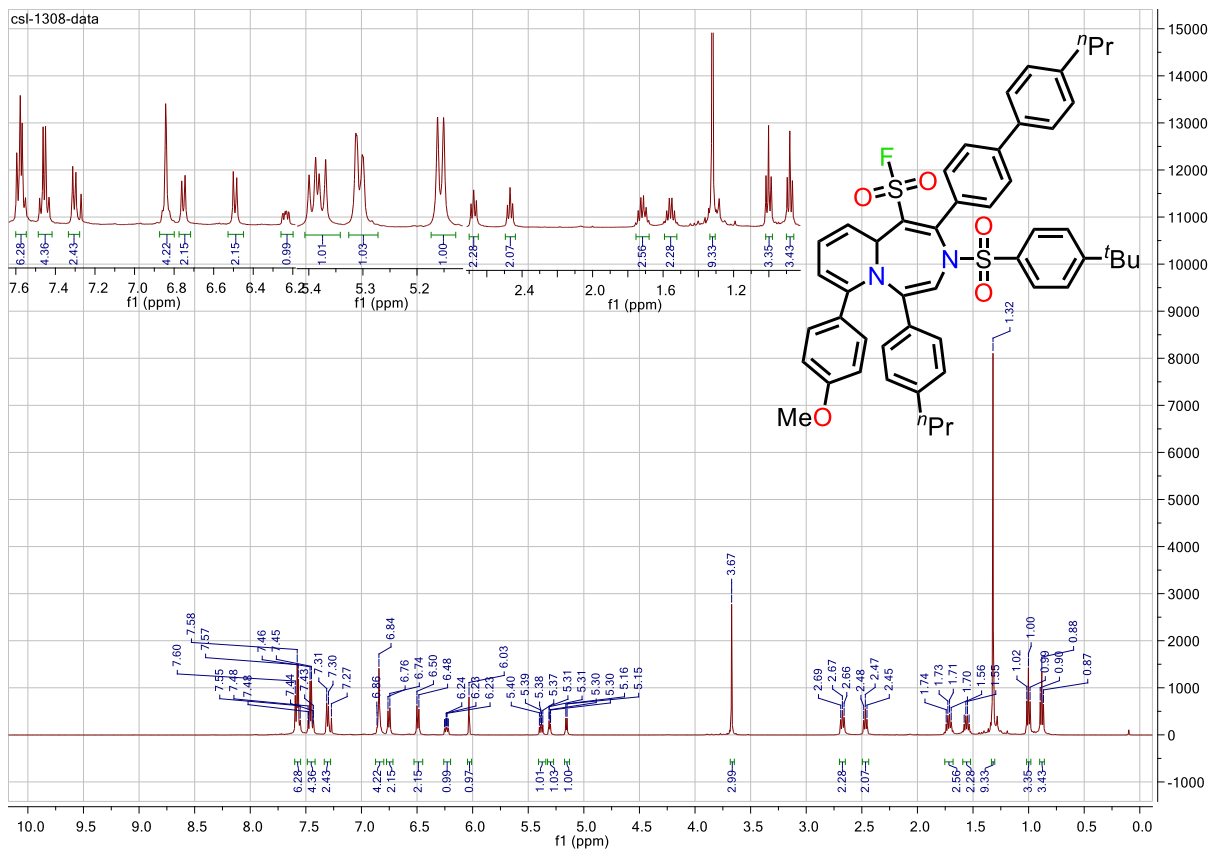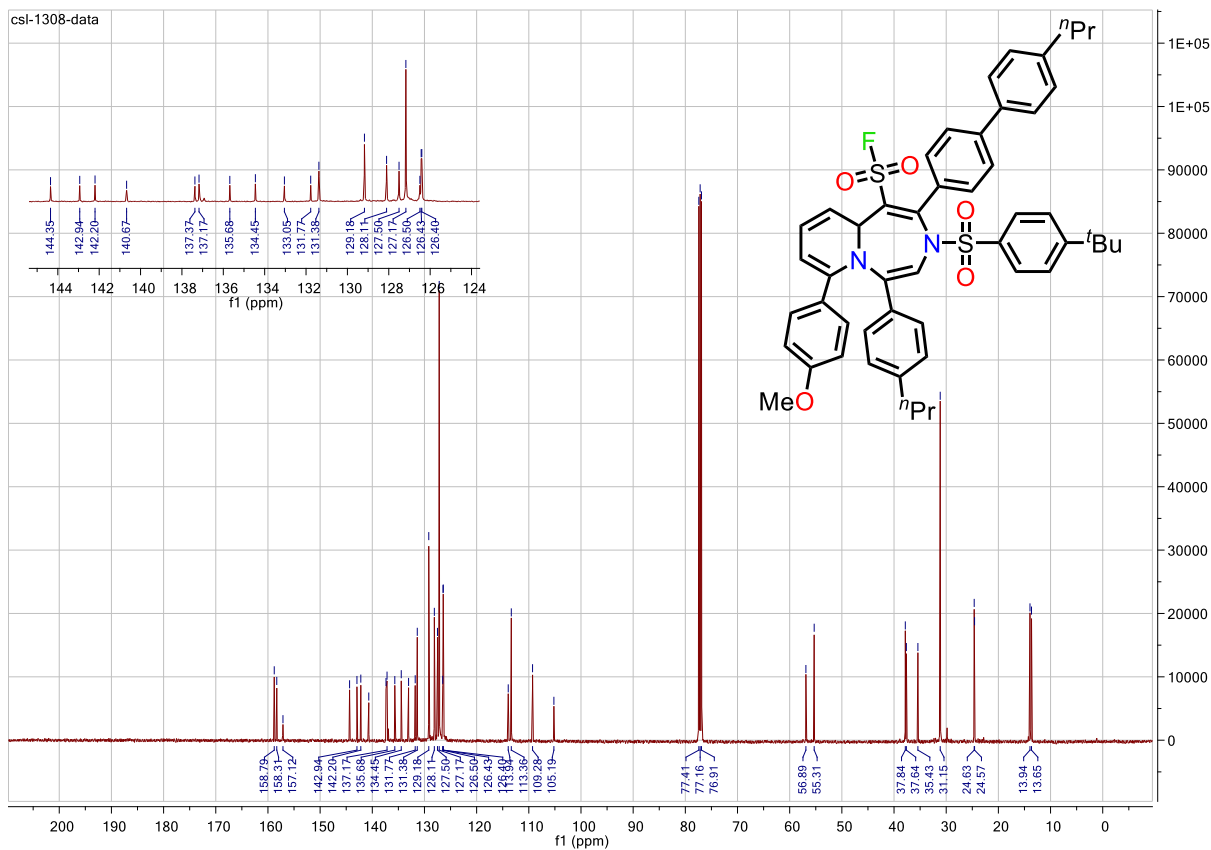

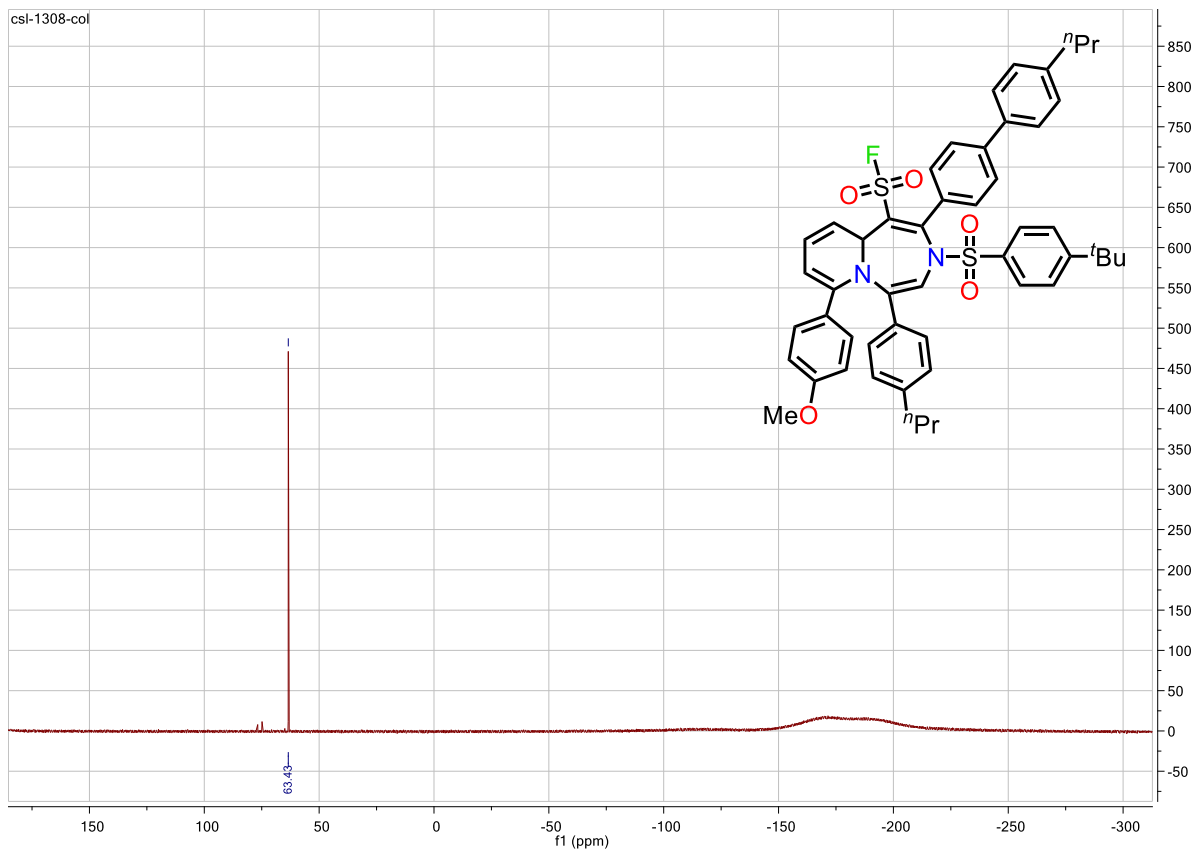

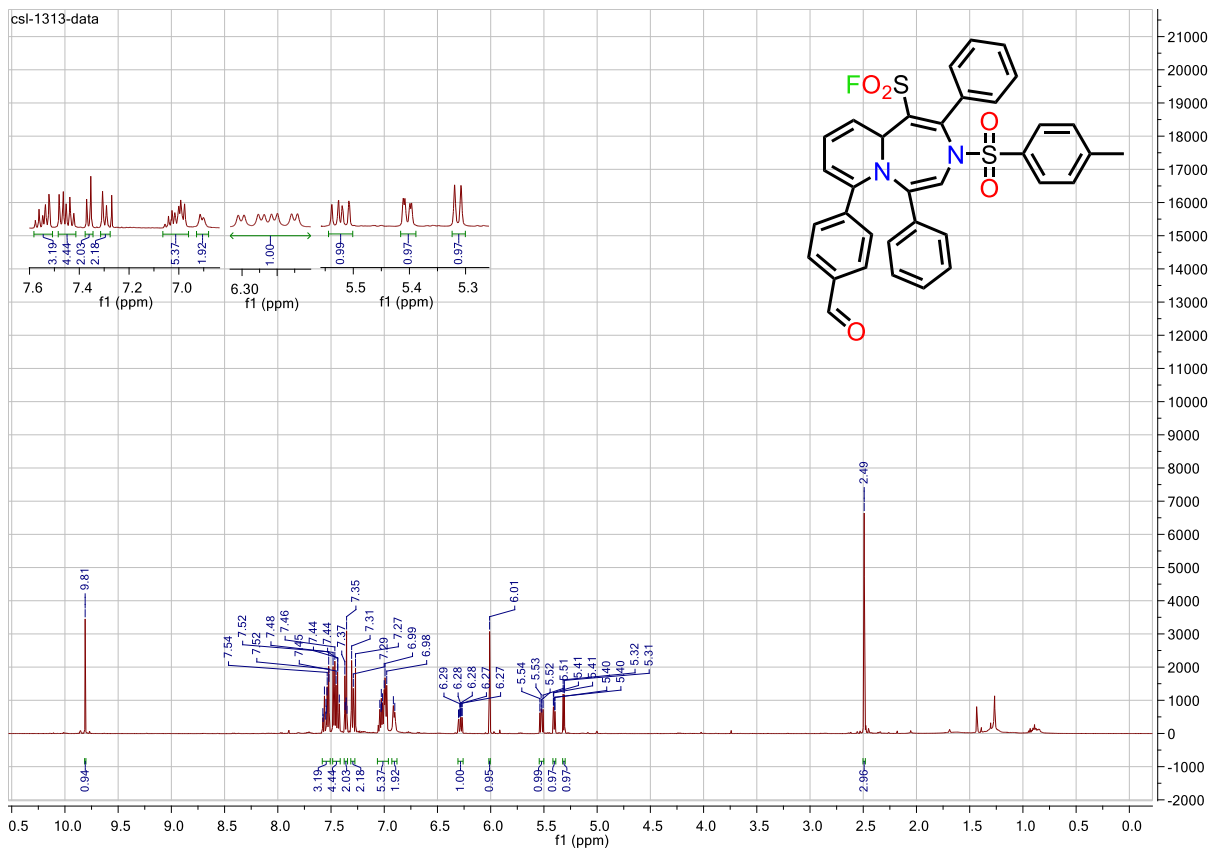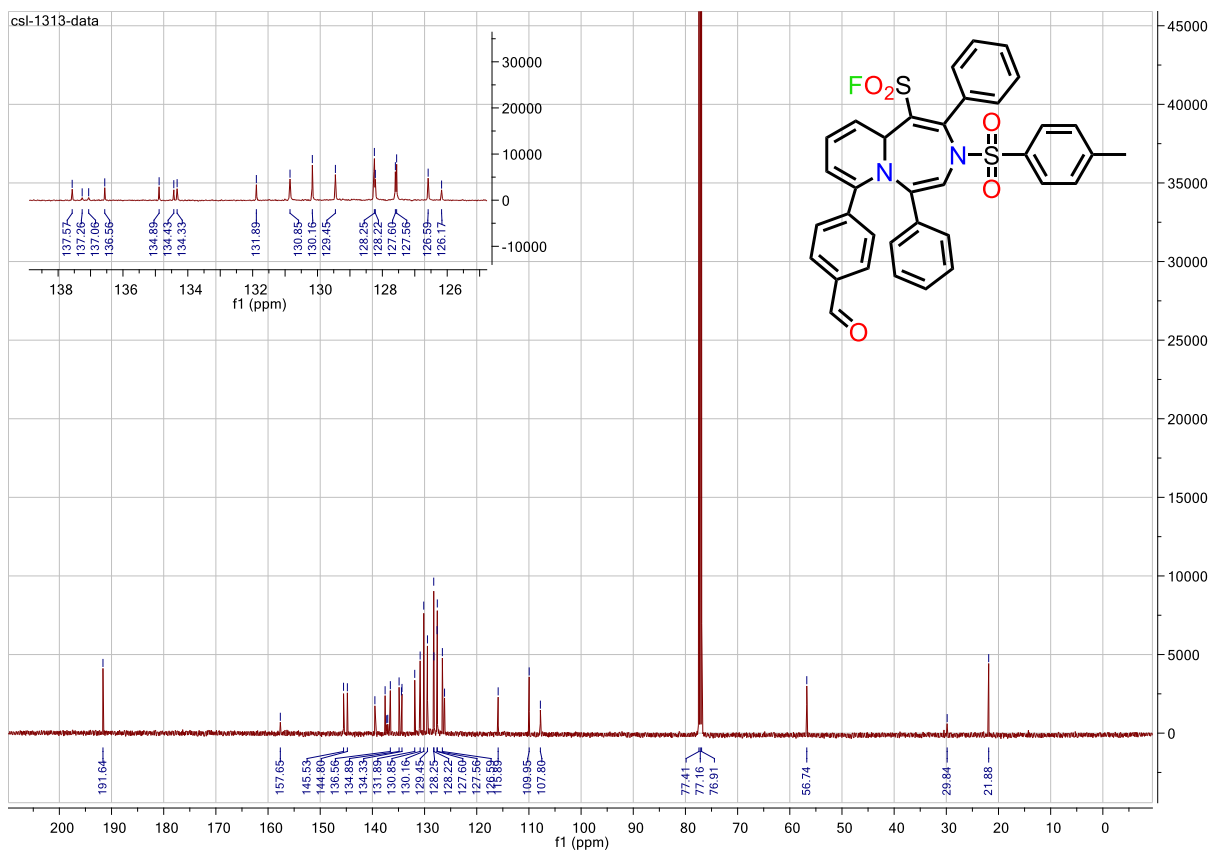



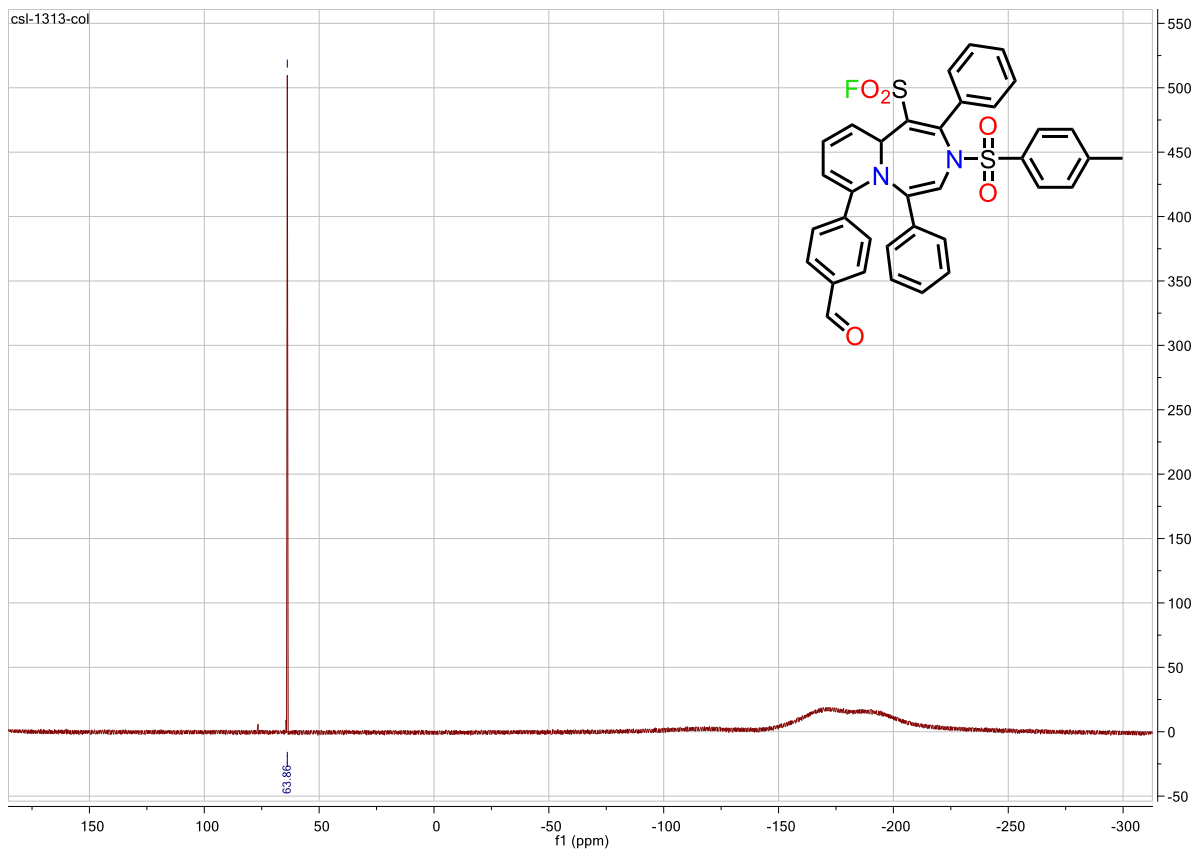

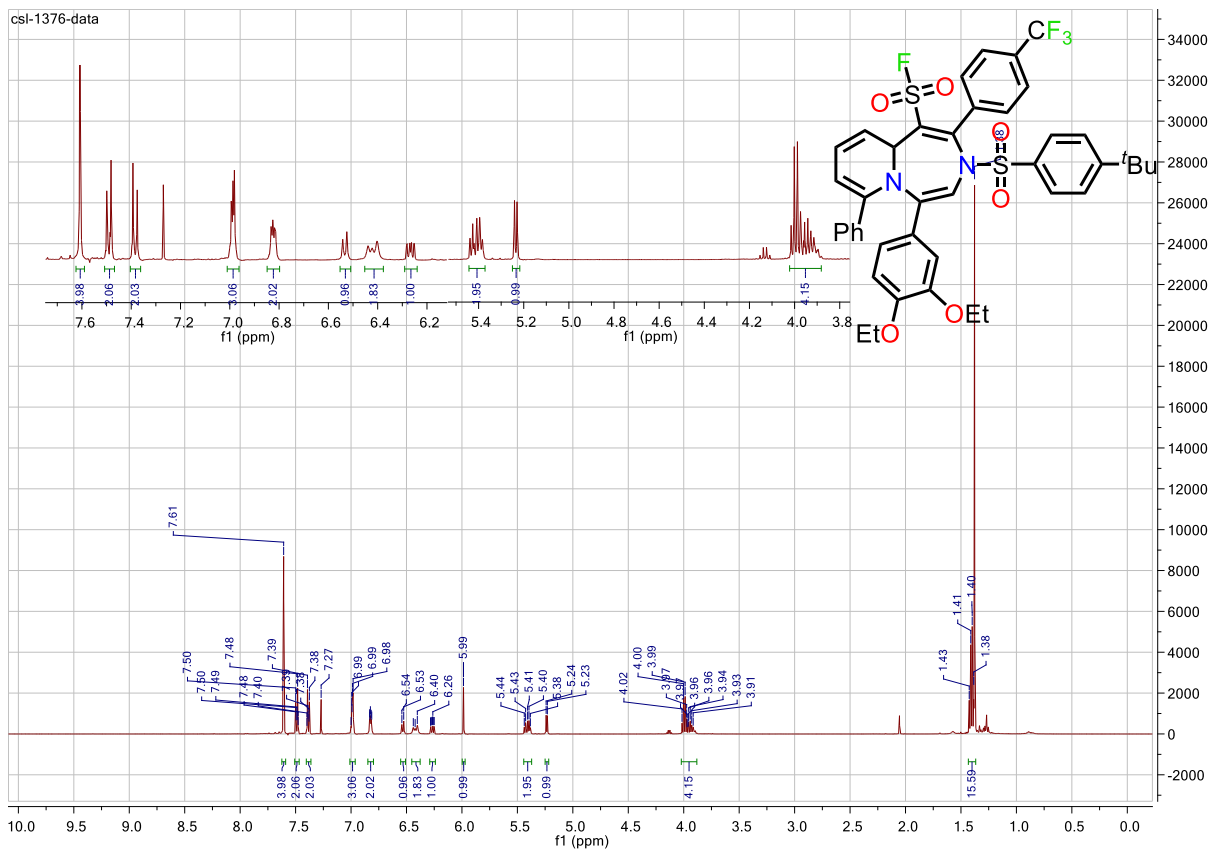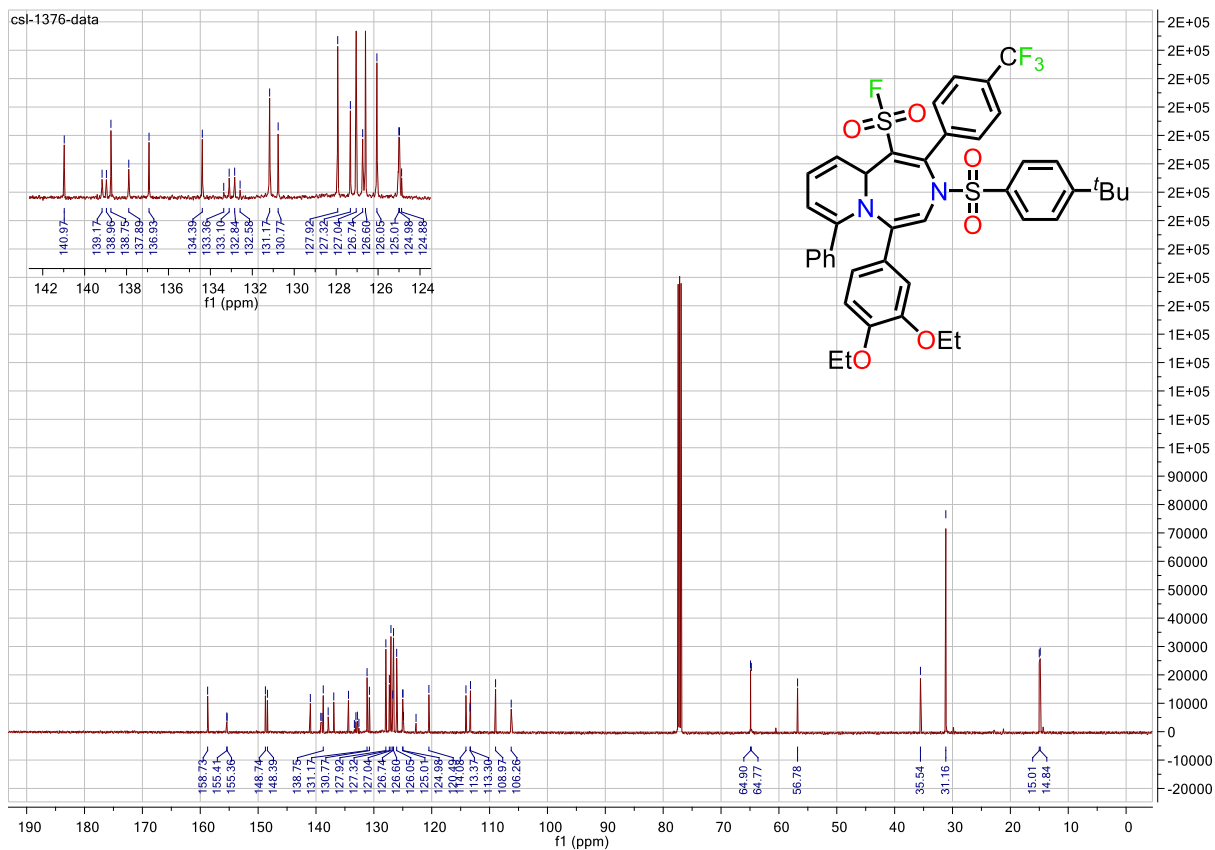

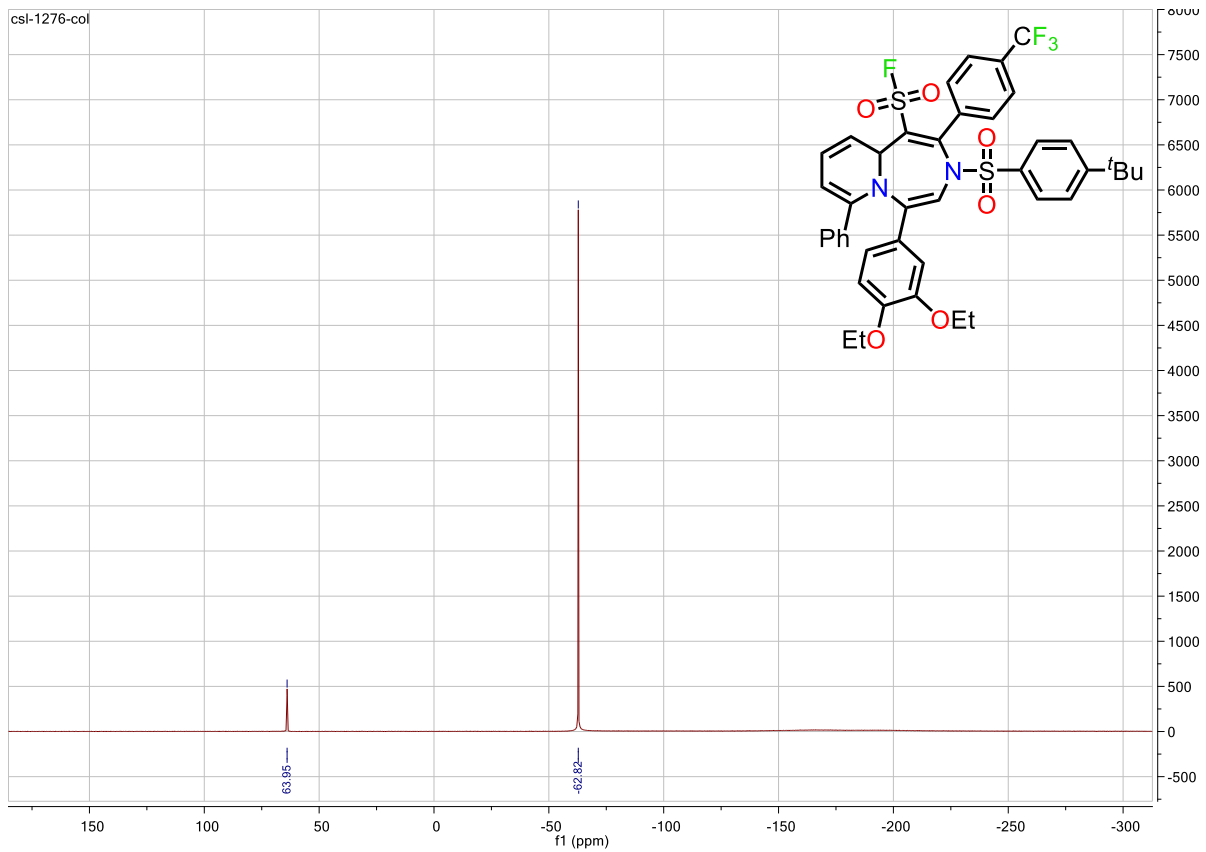

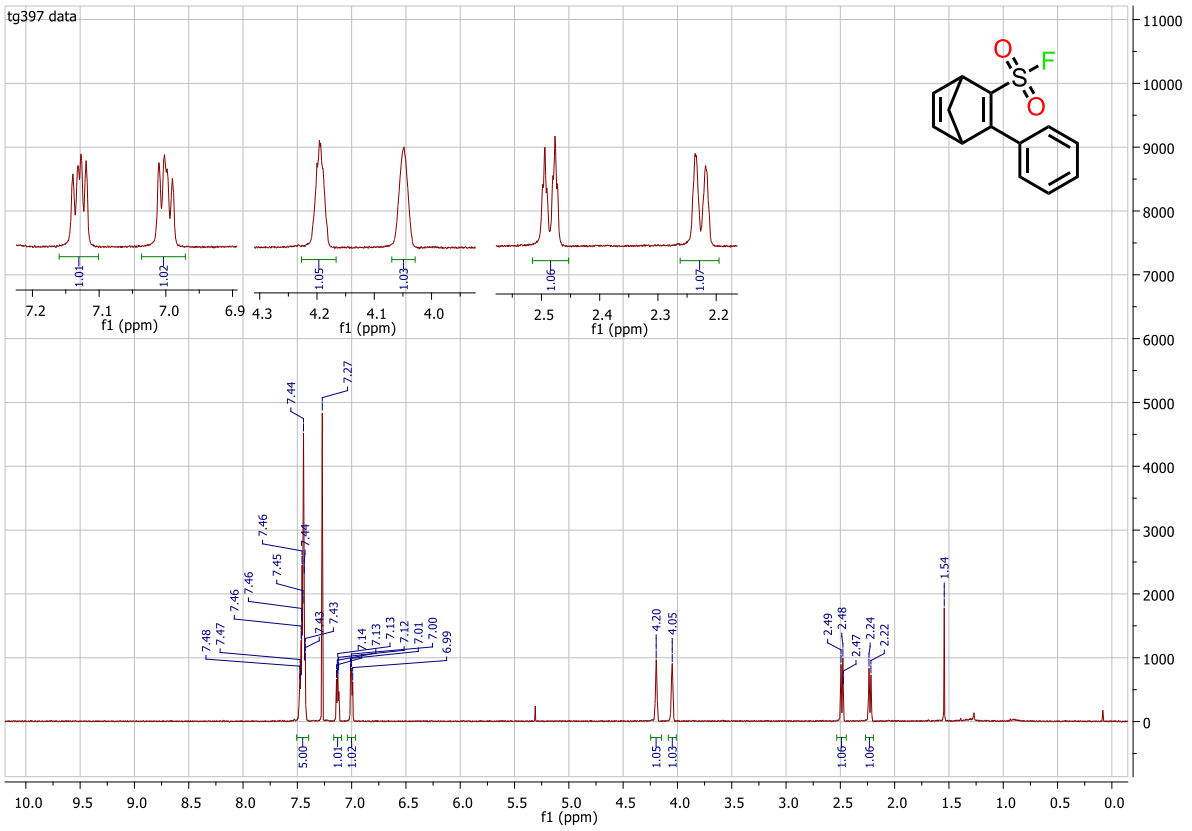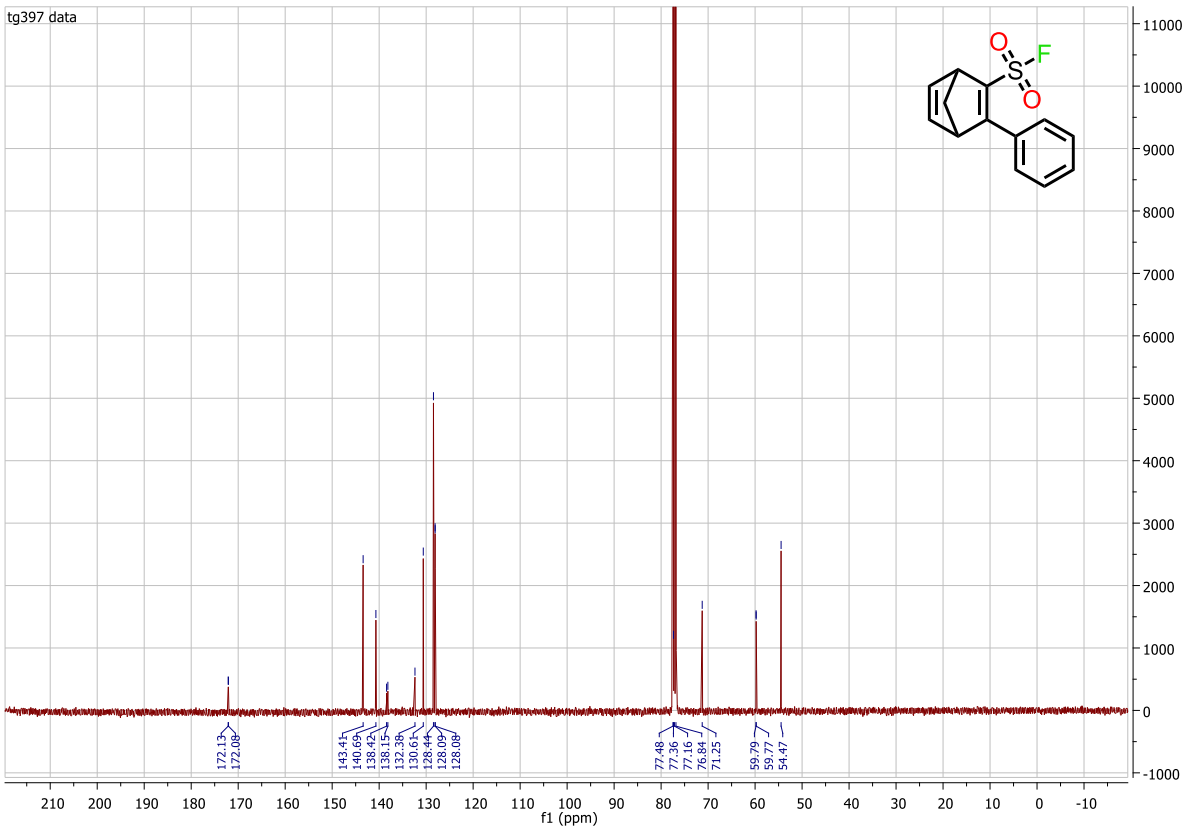

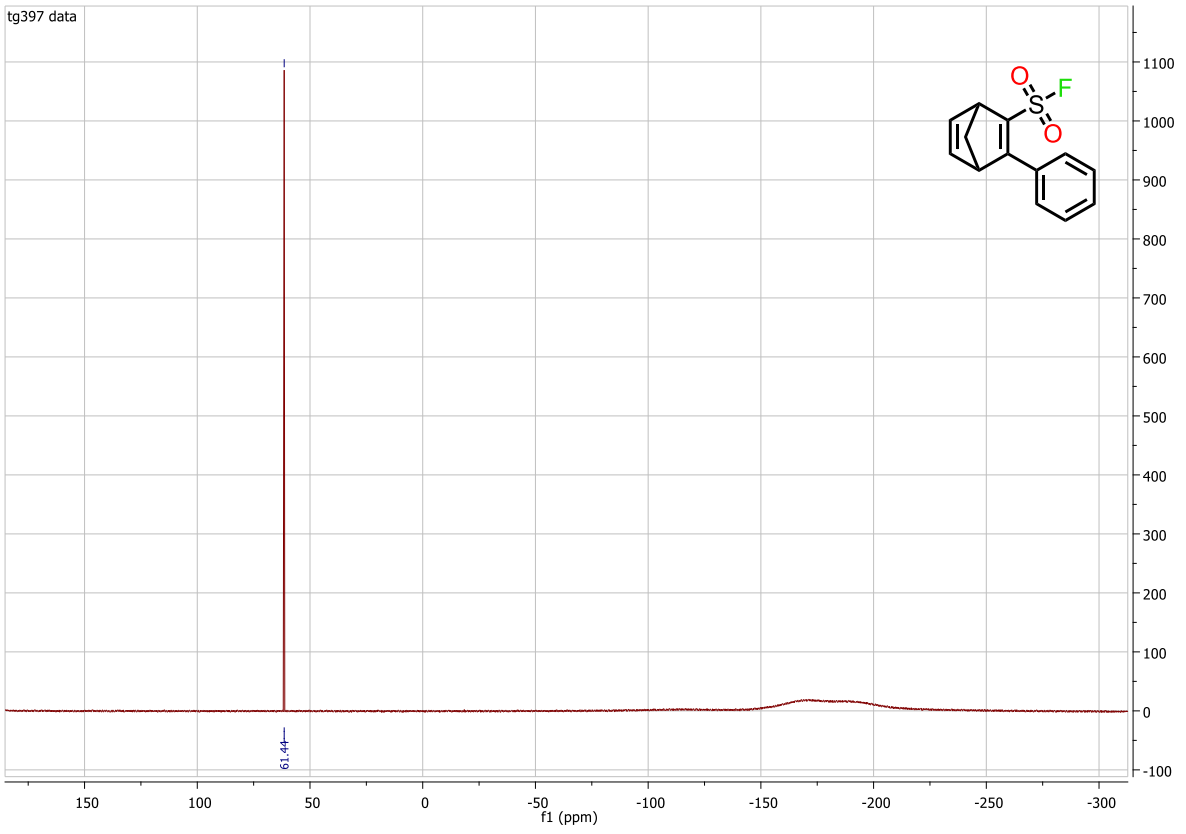

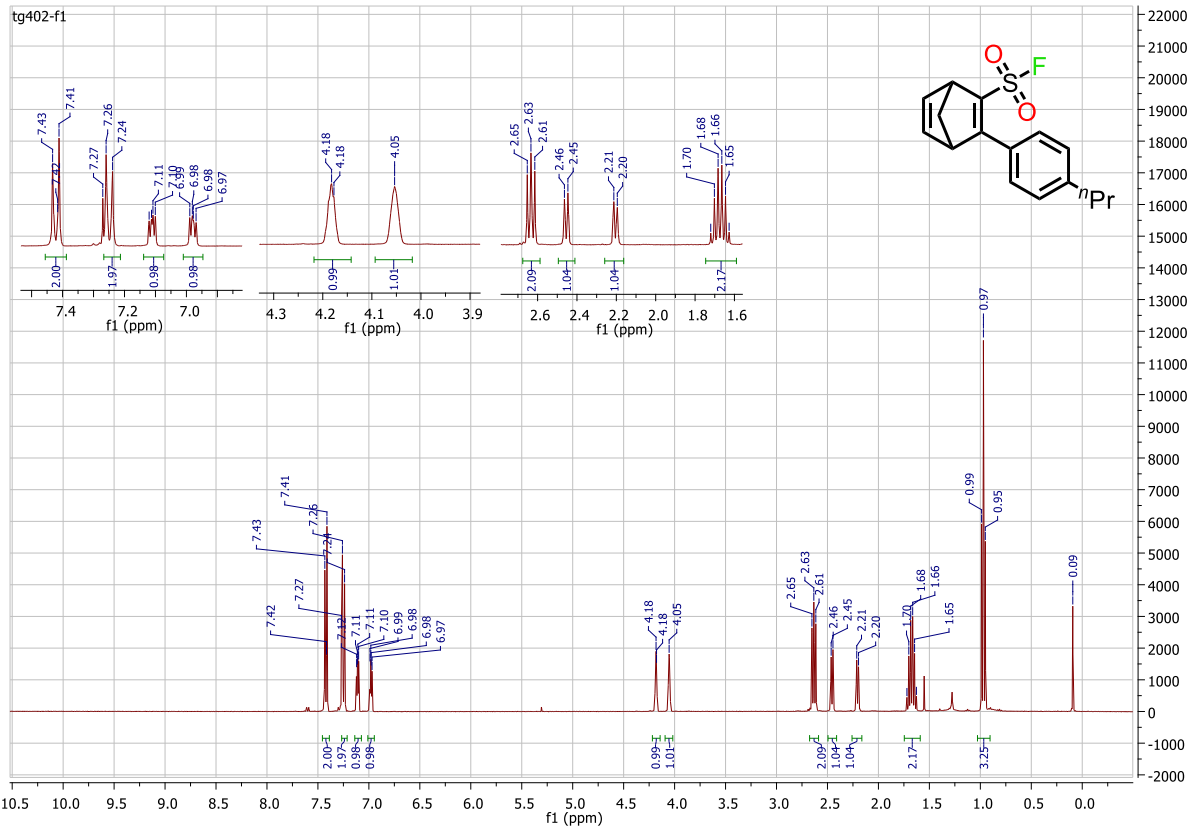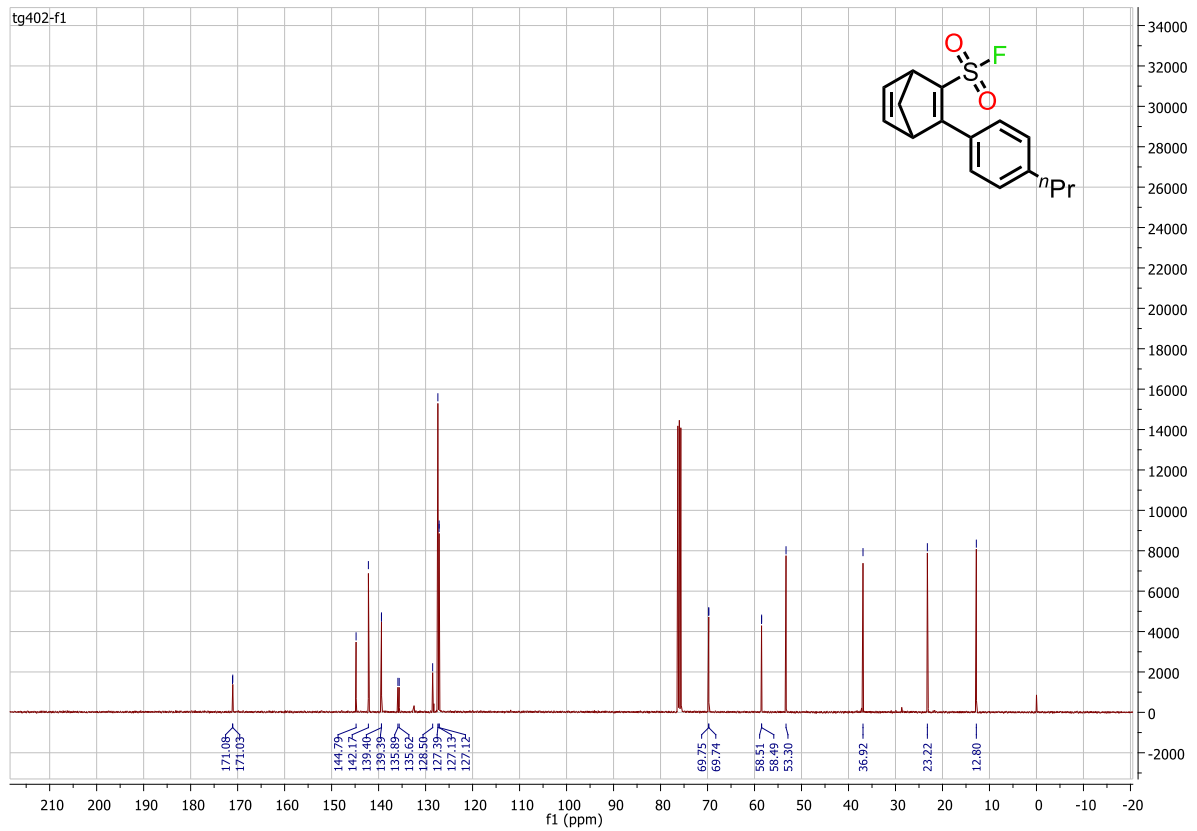

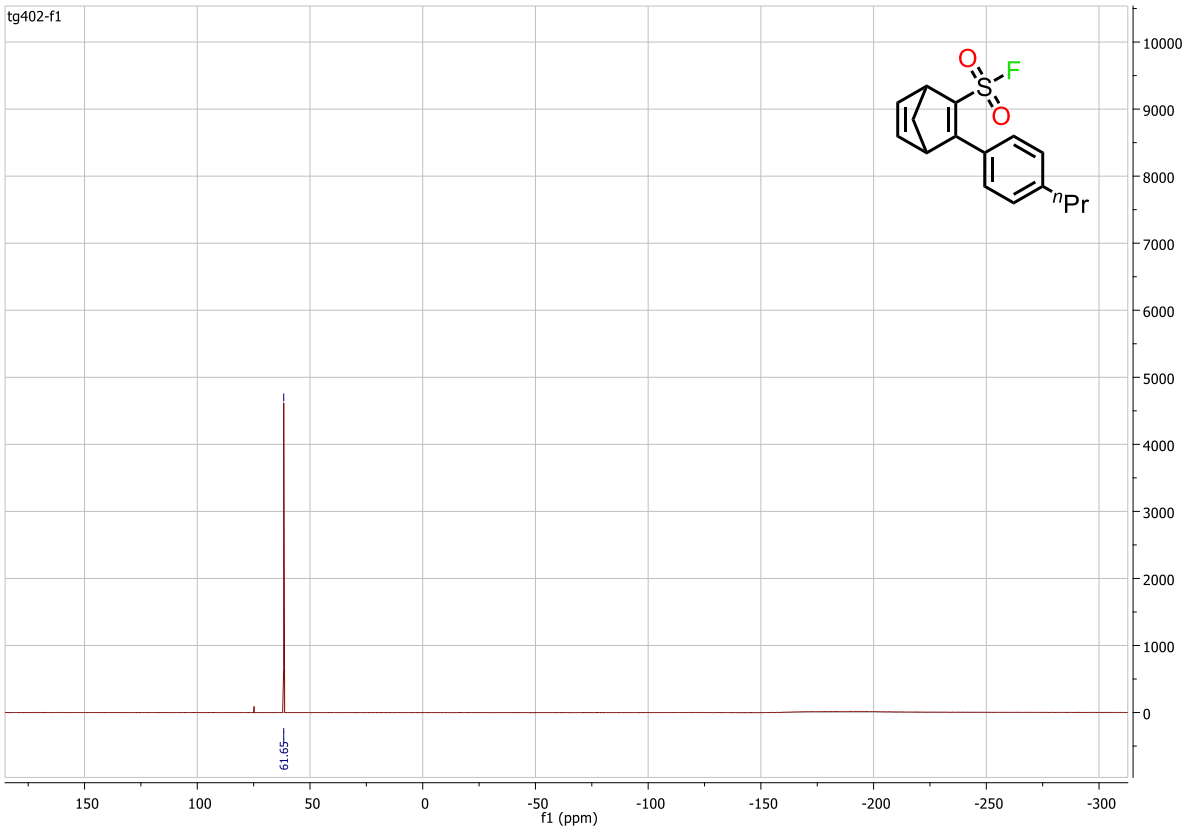

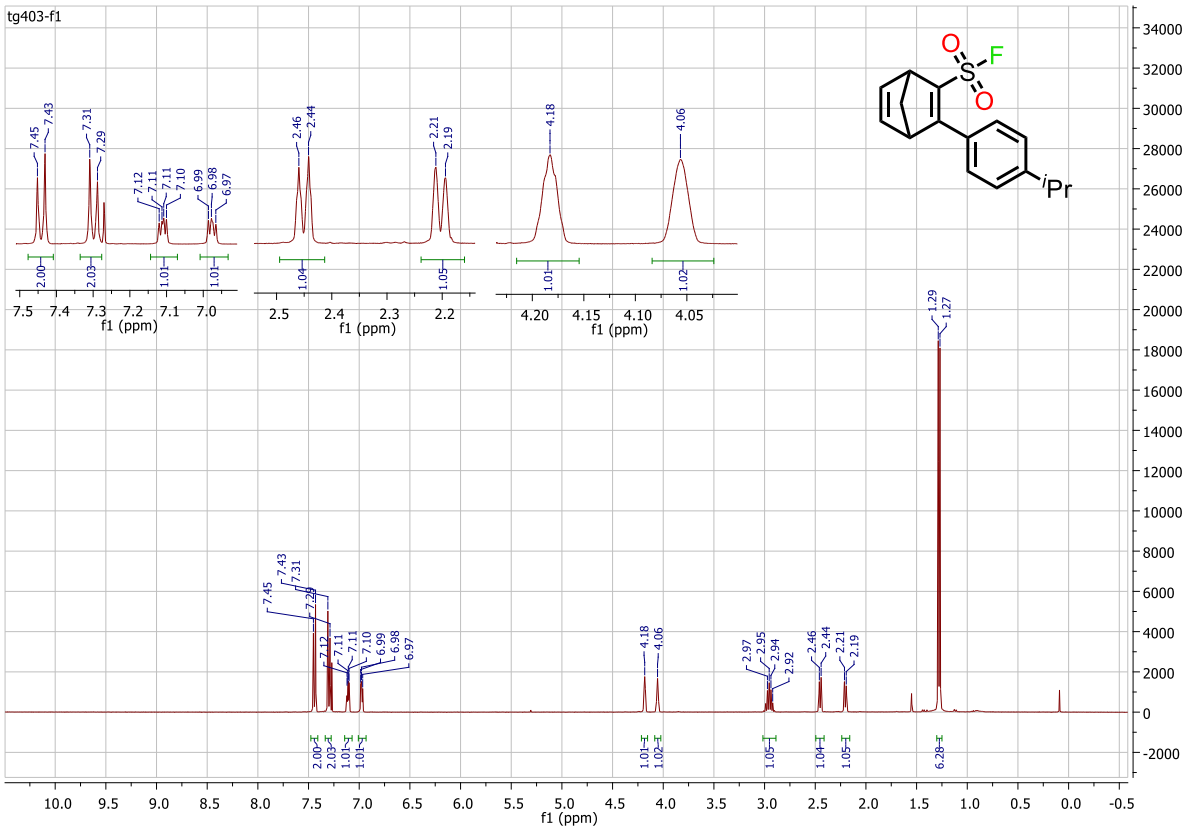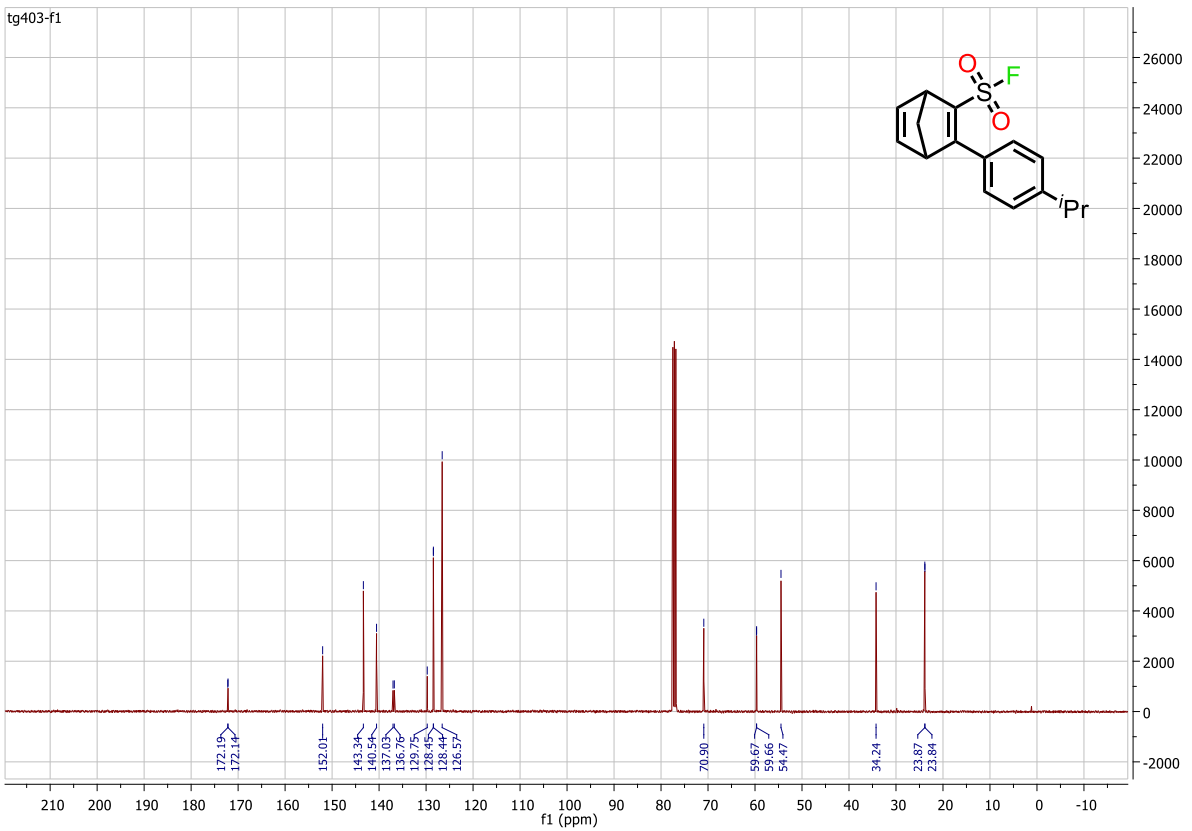



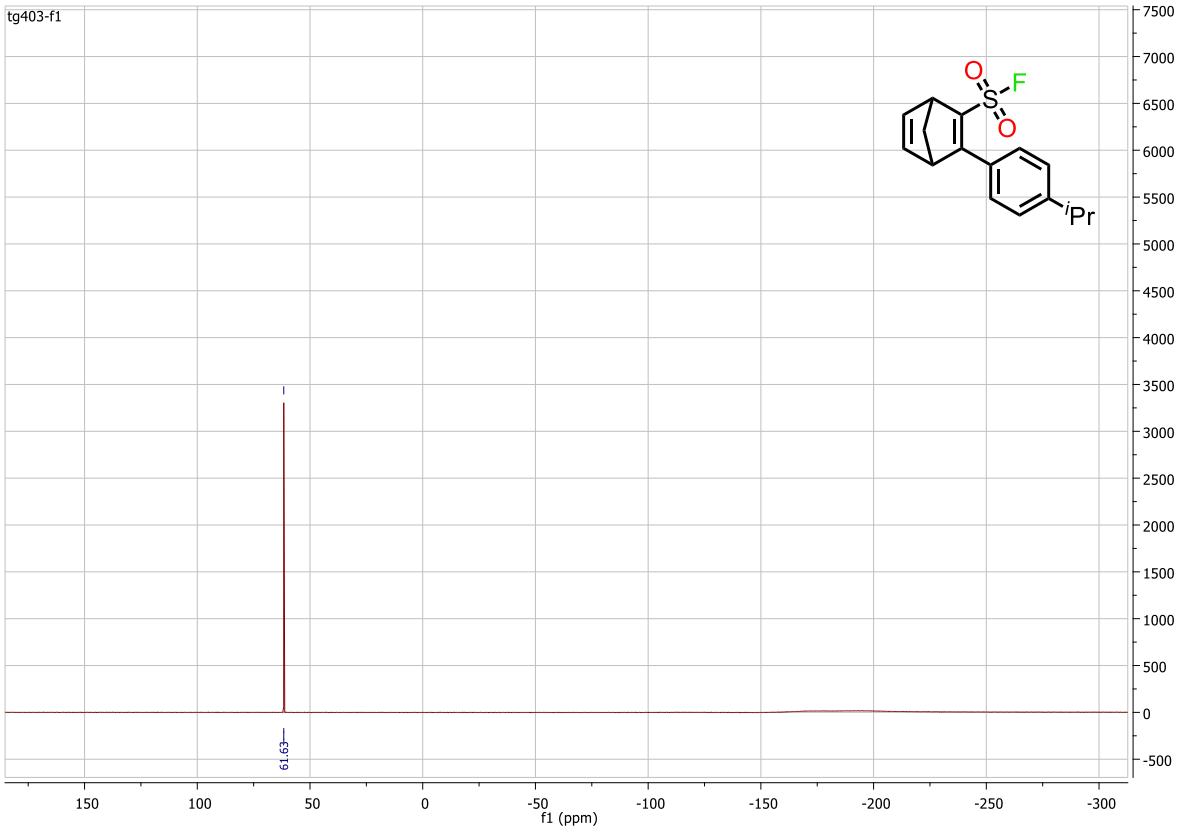

tg474-data

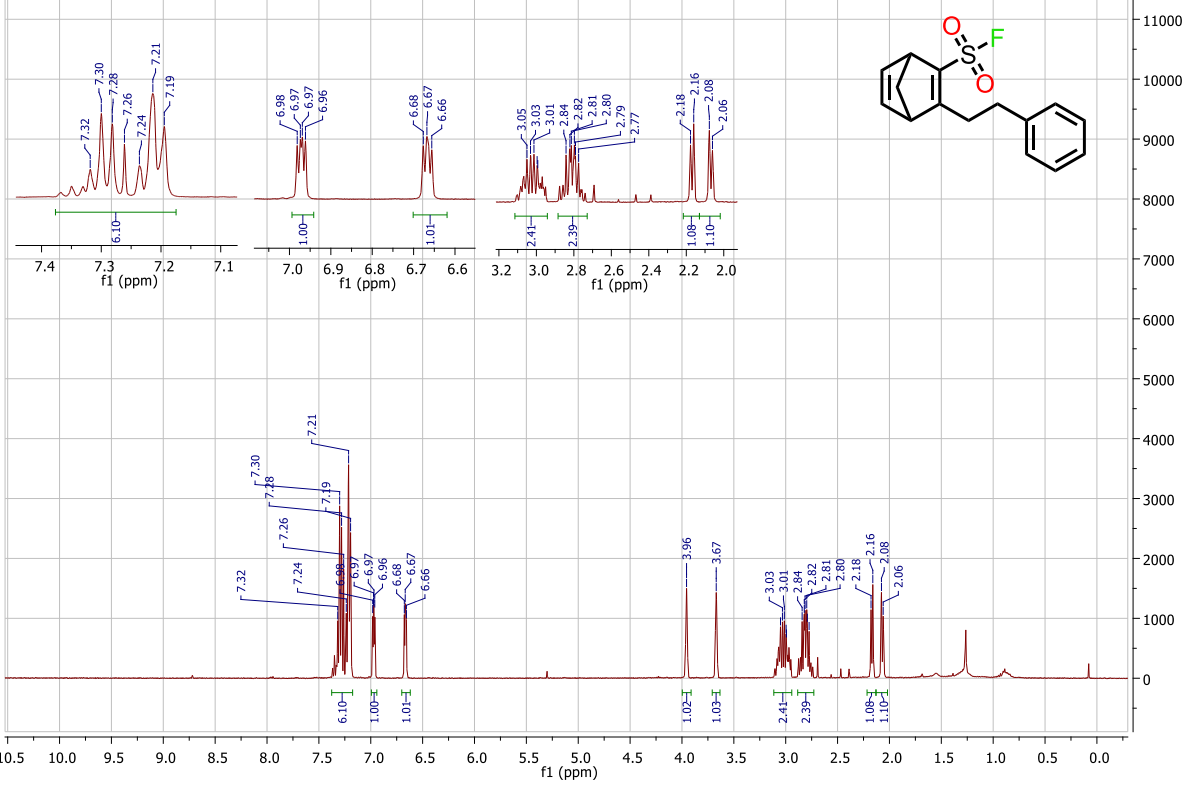

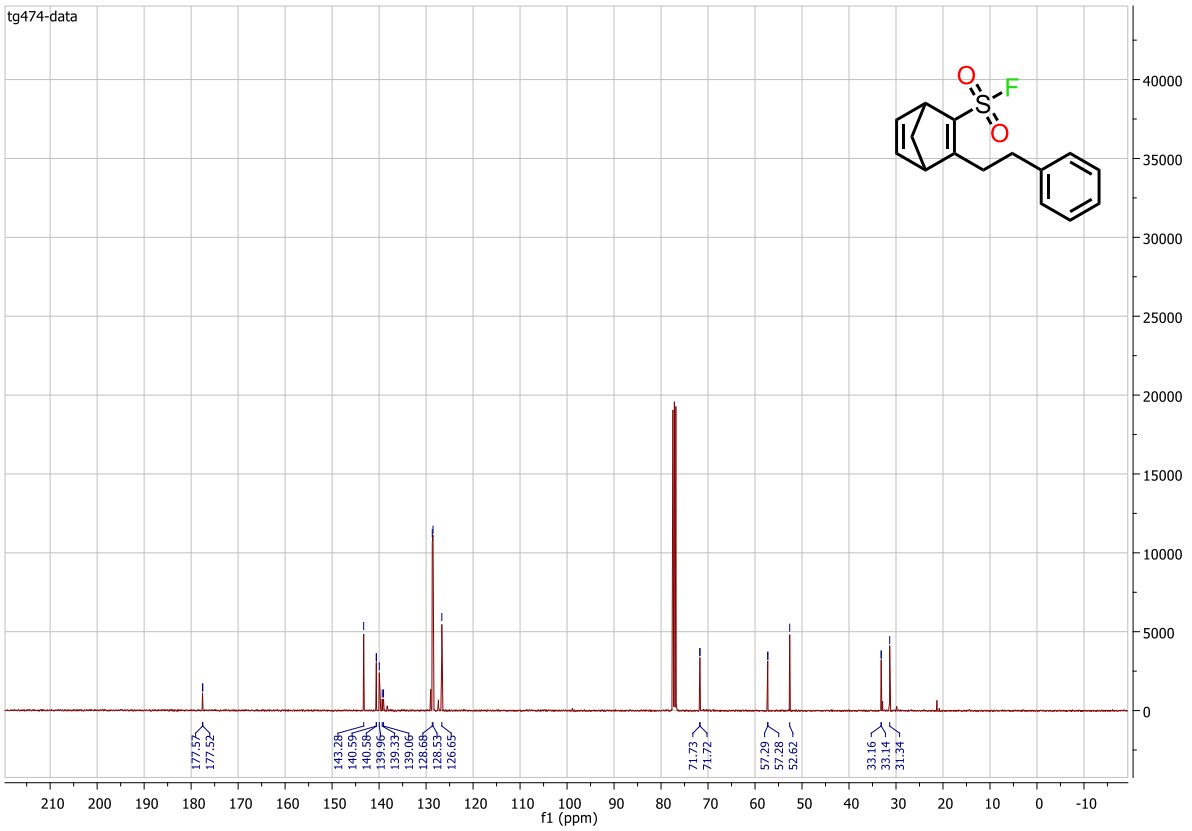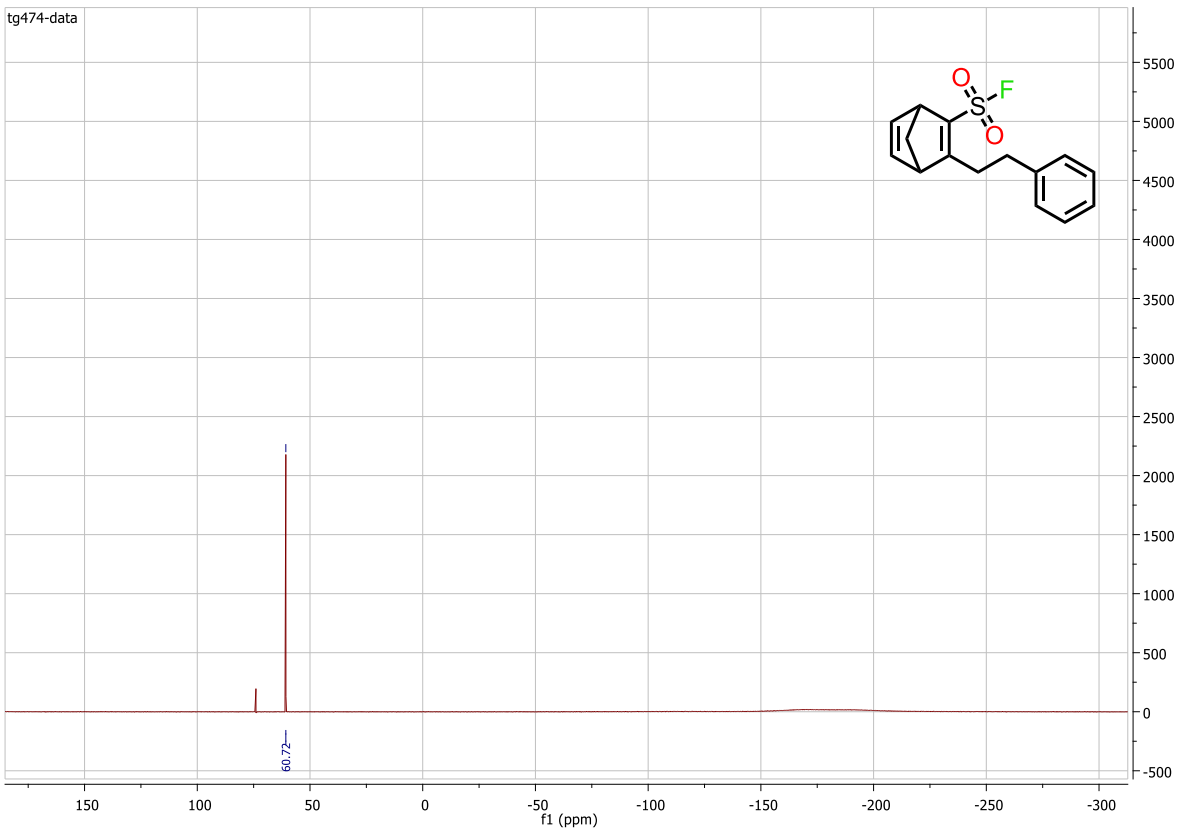

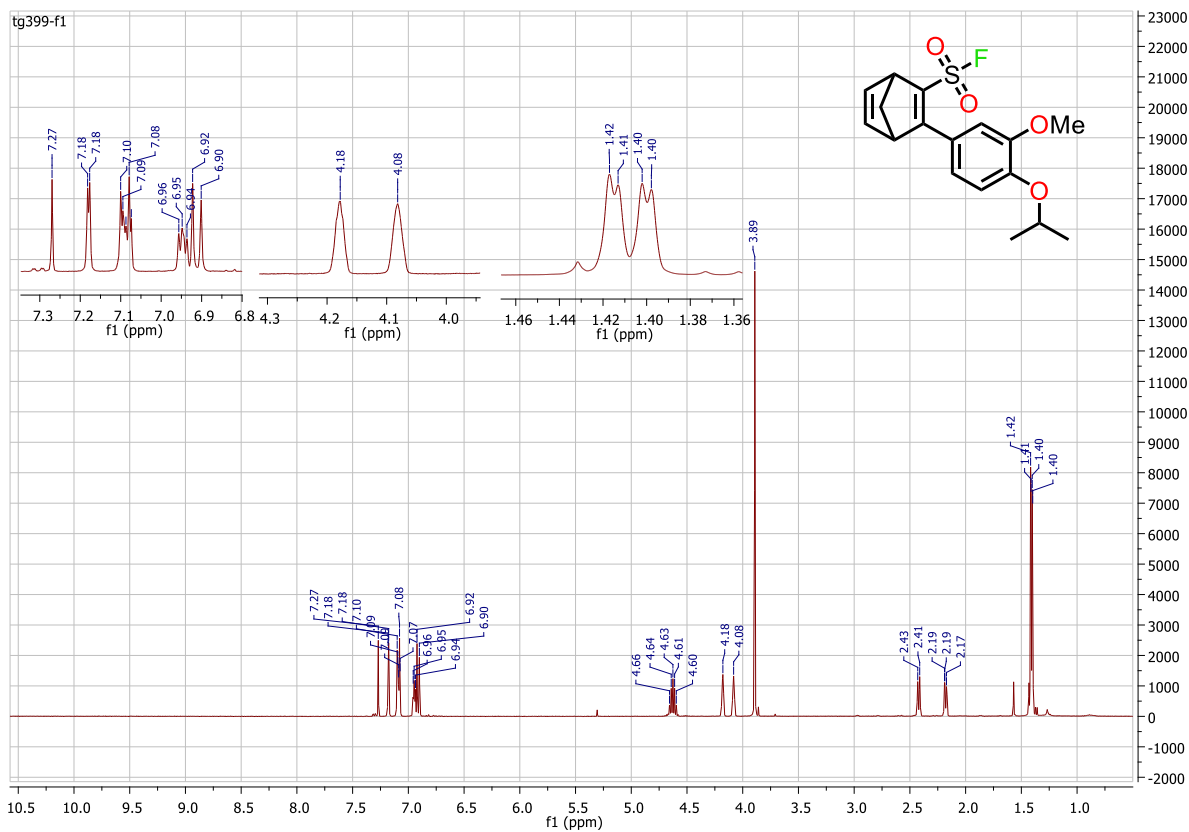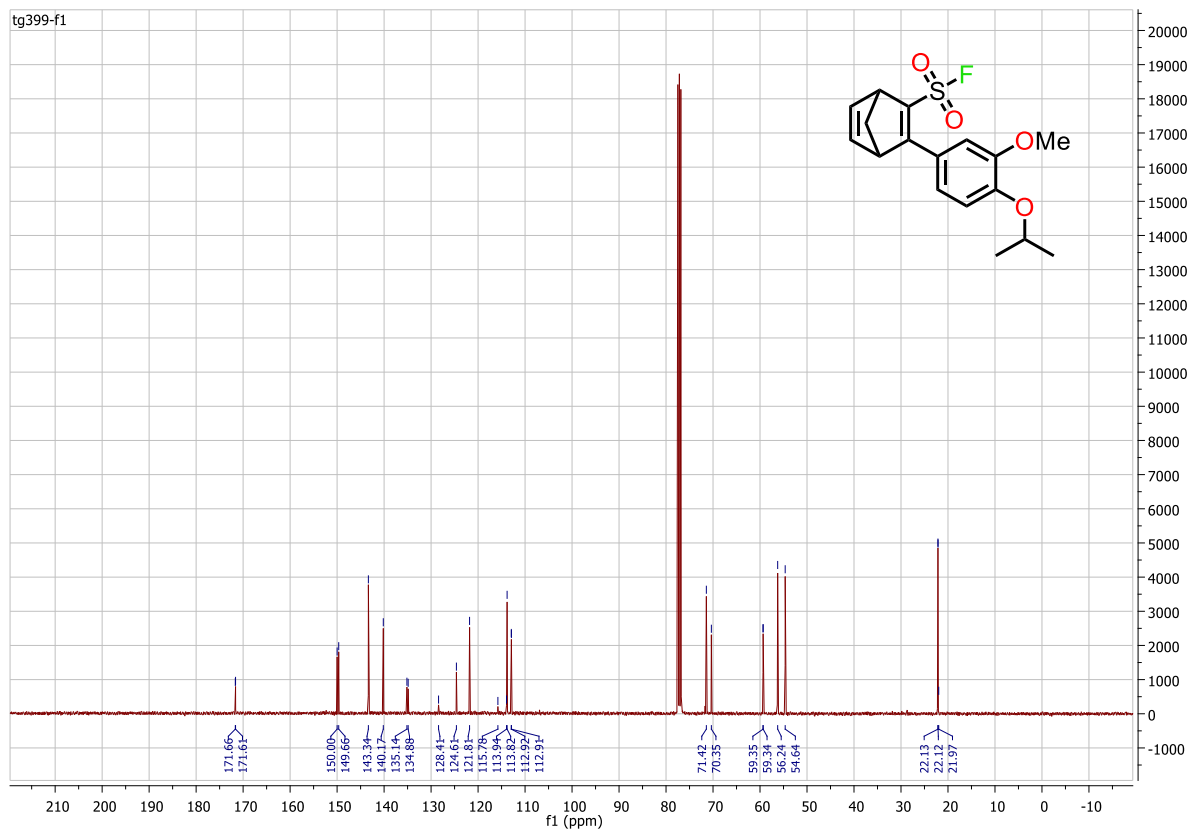

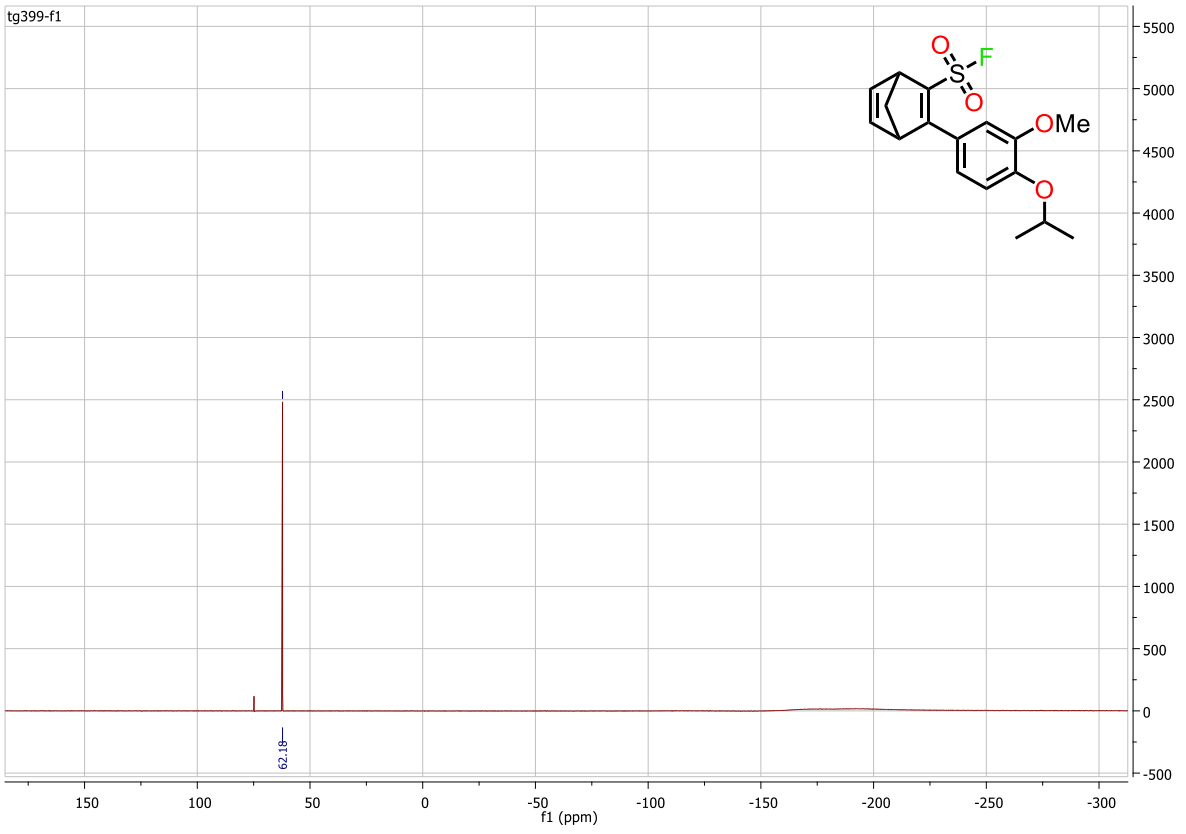

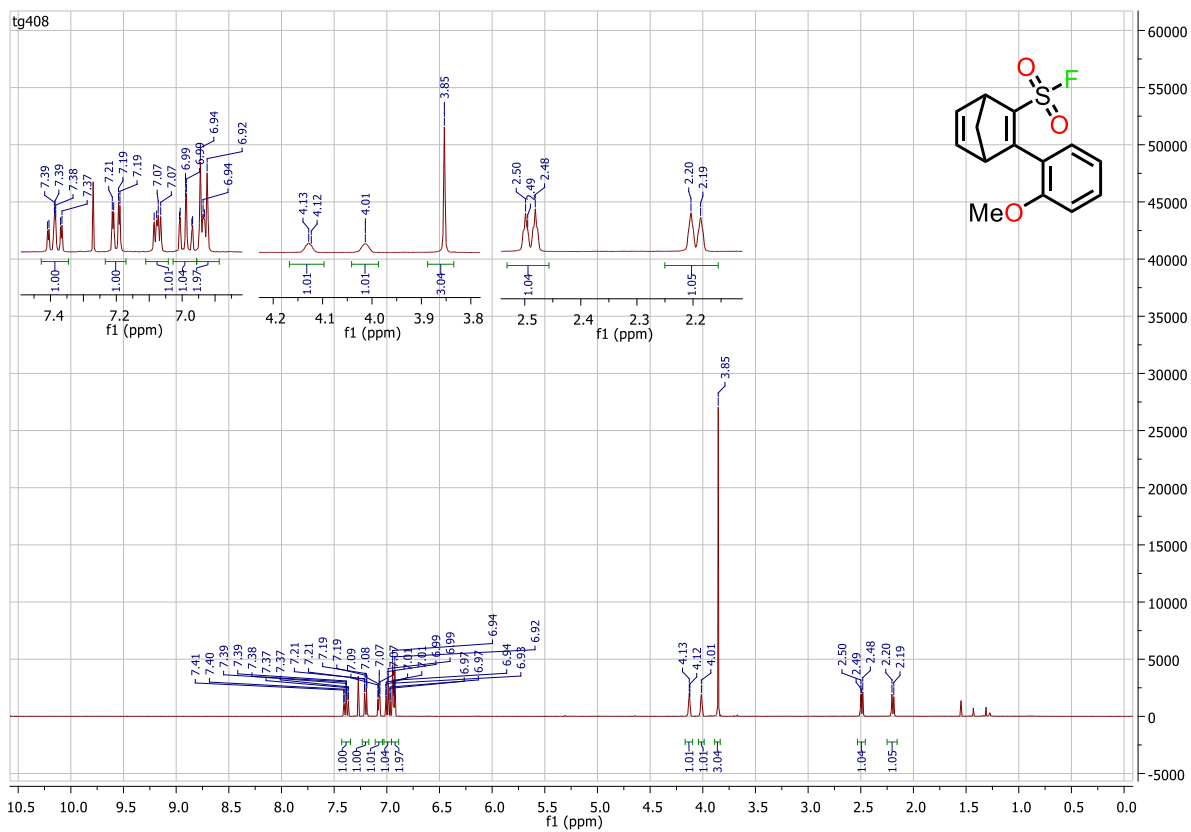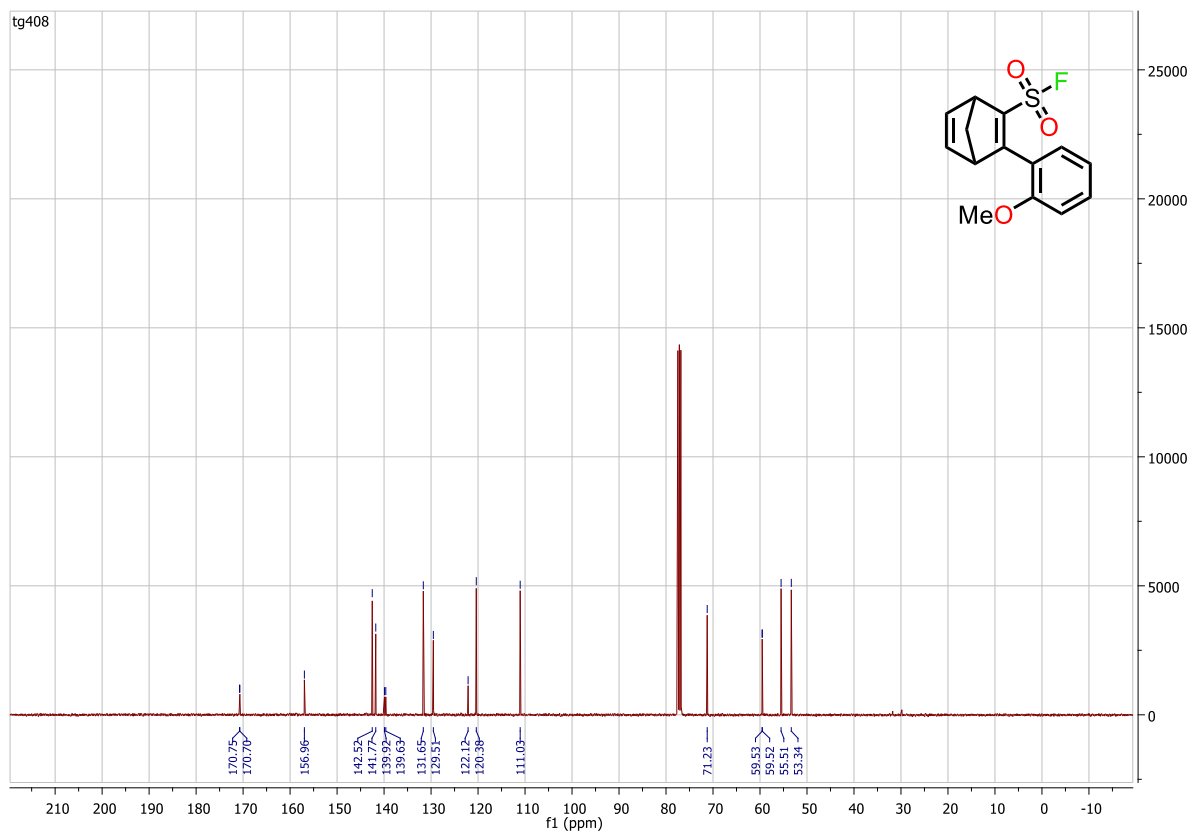

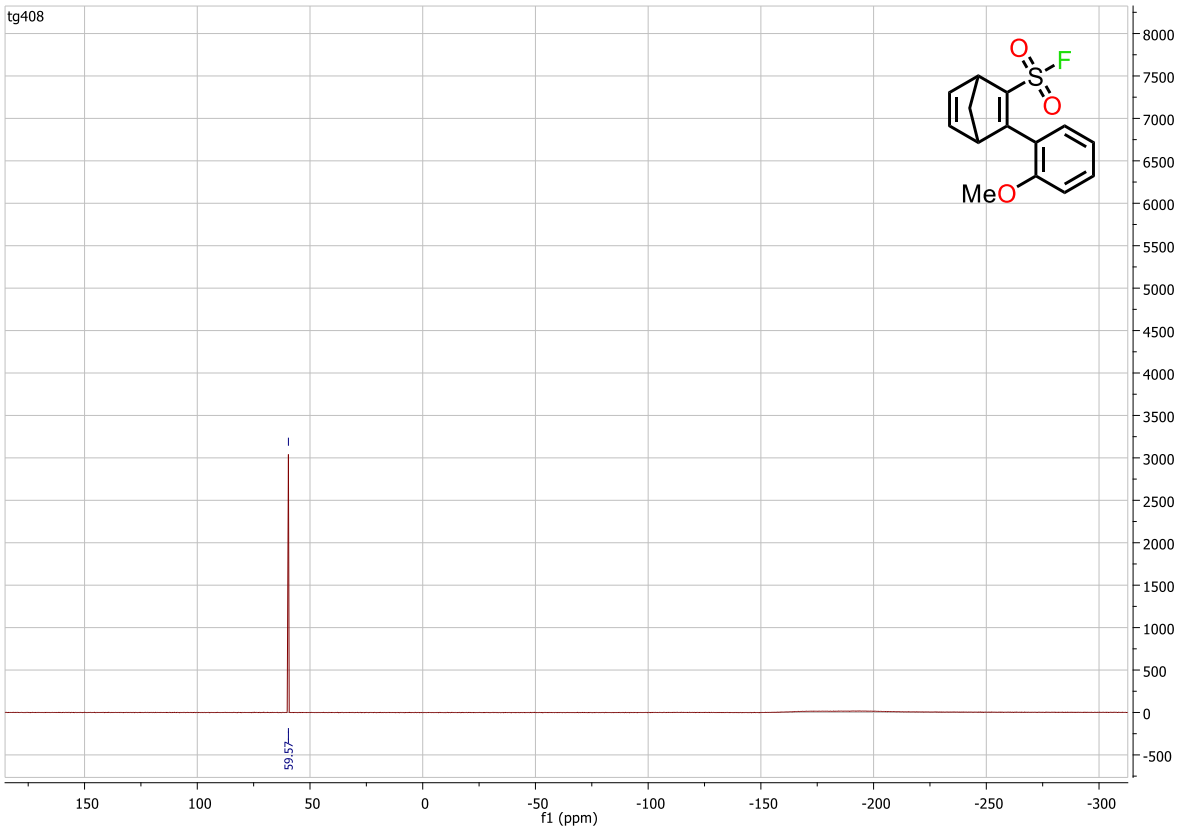

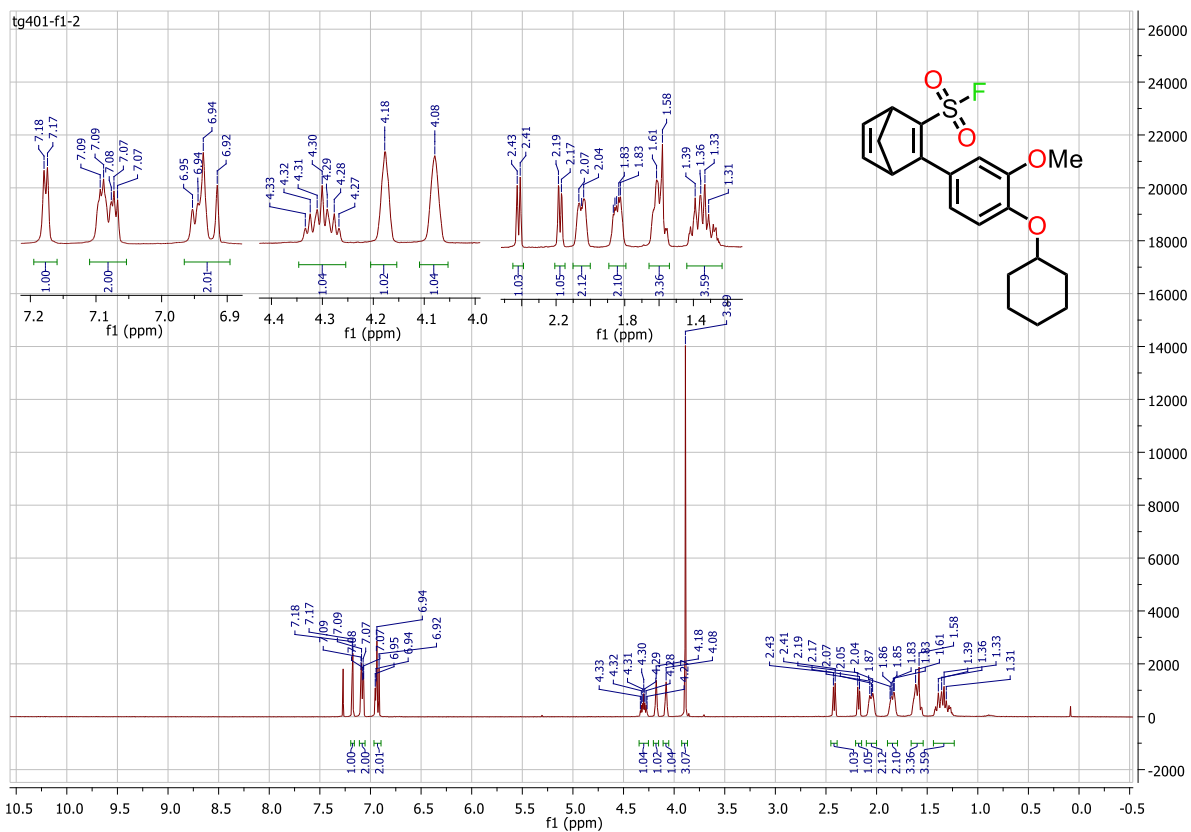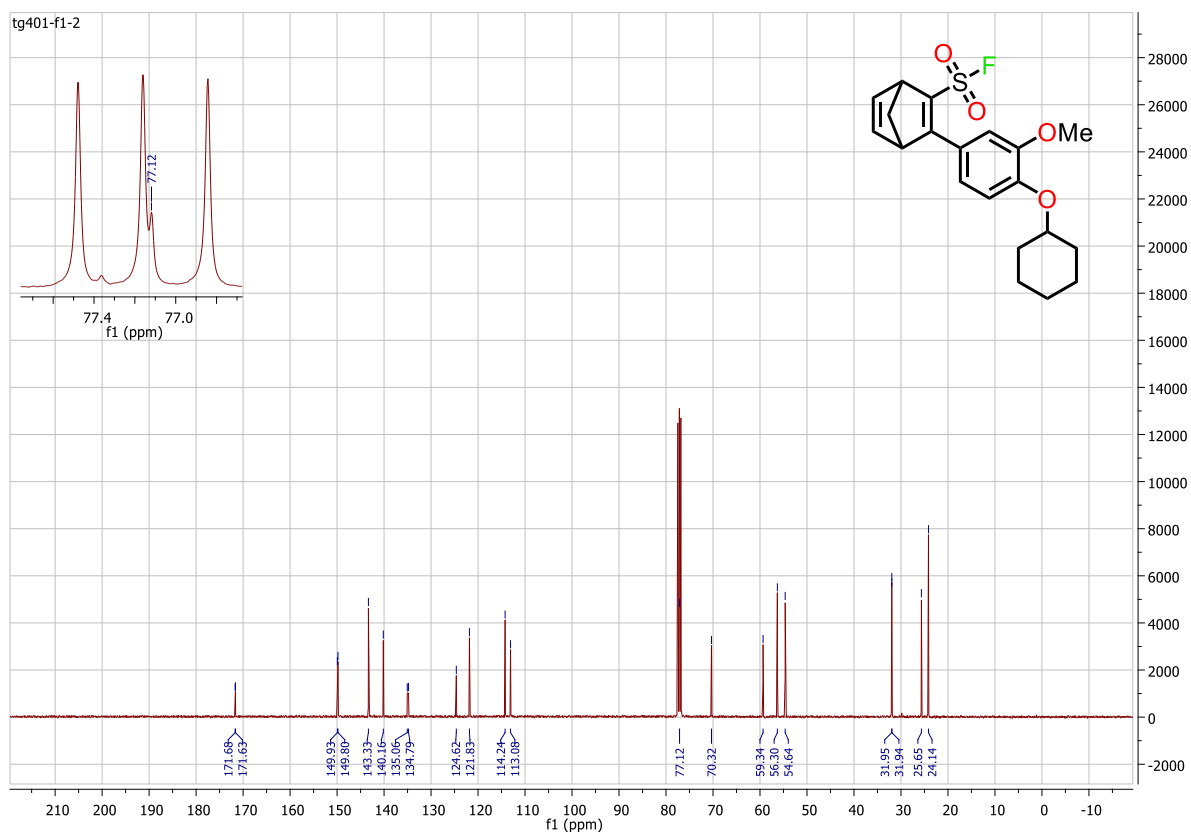



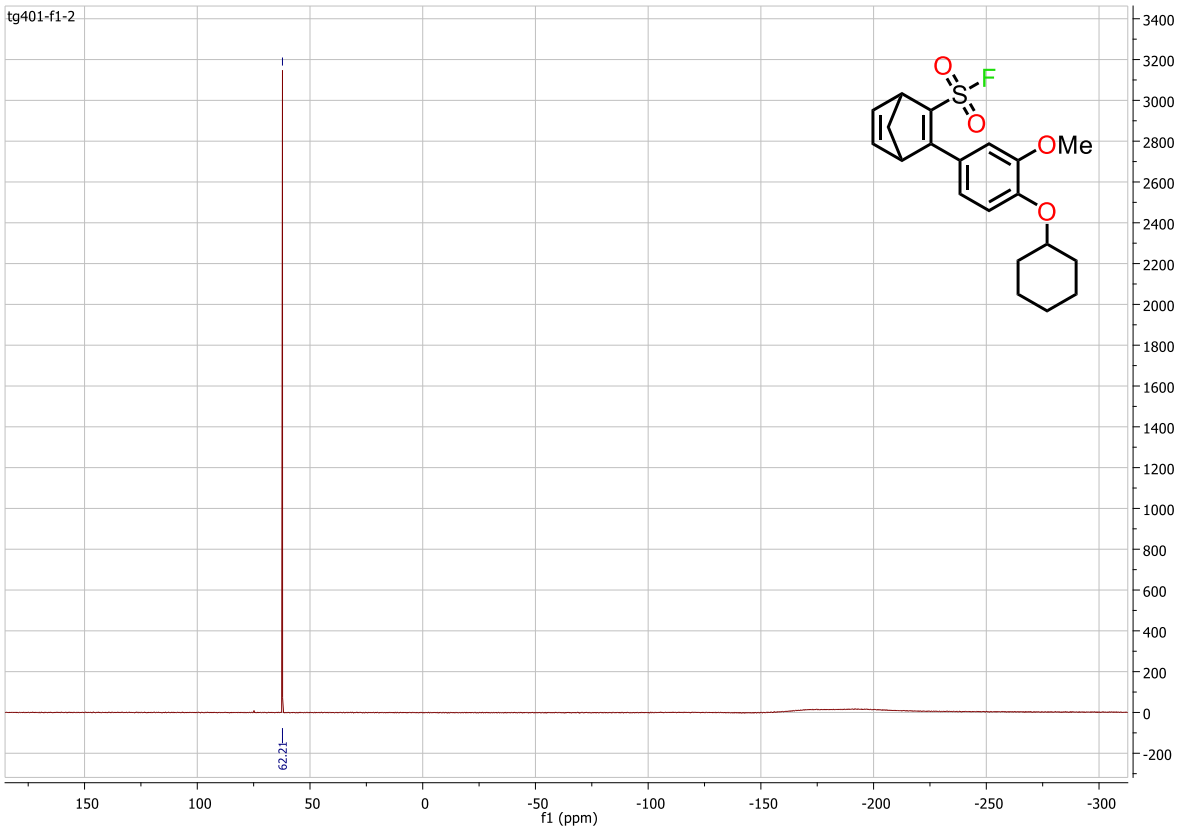

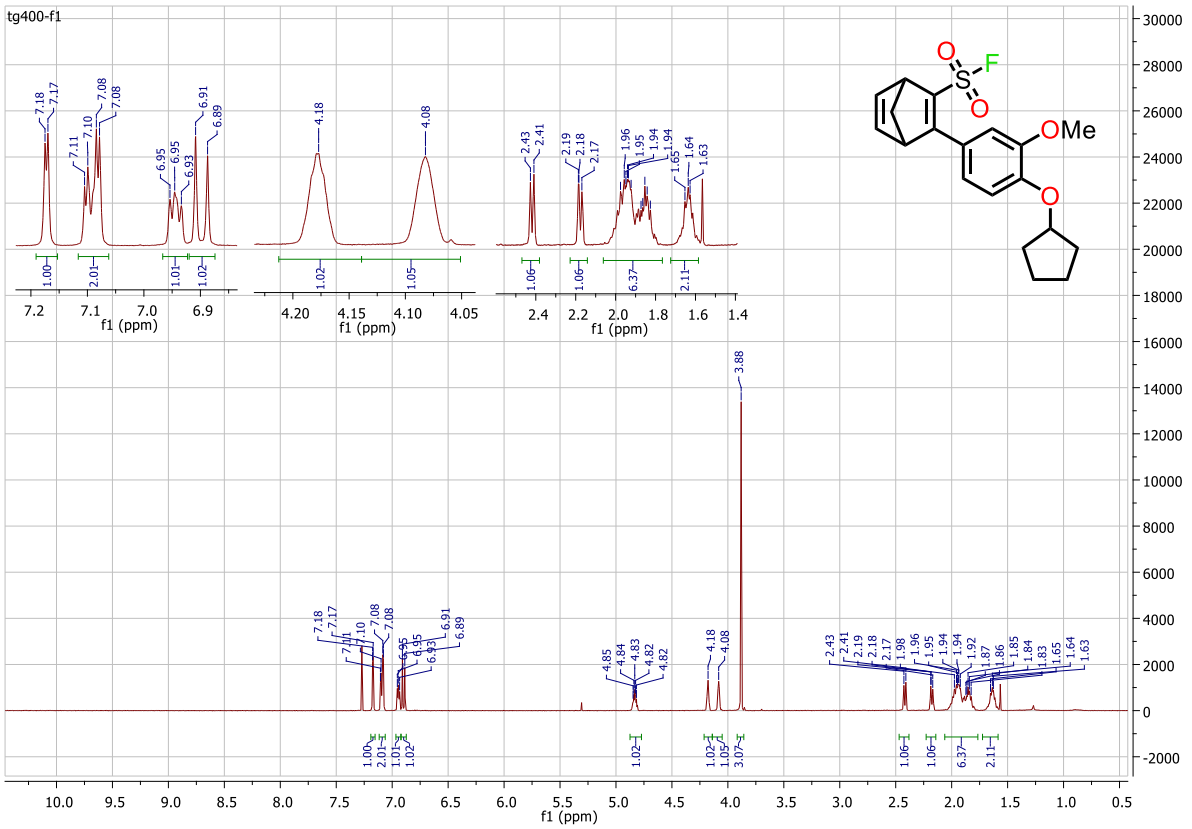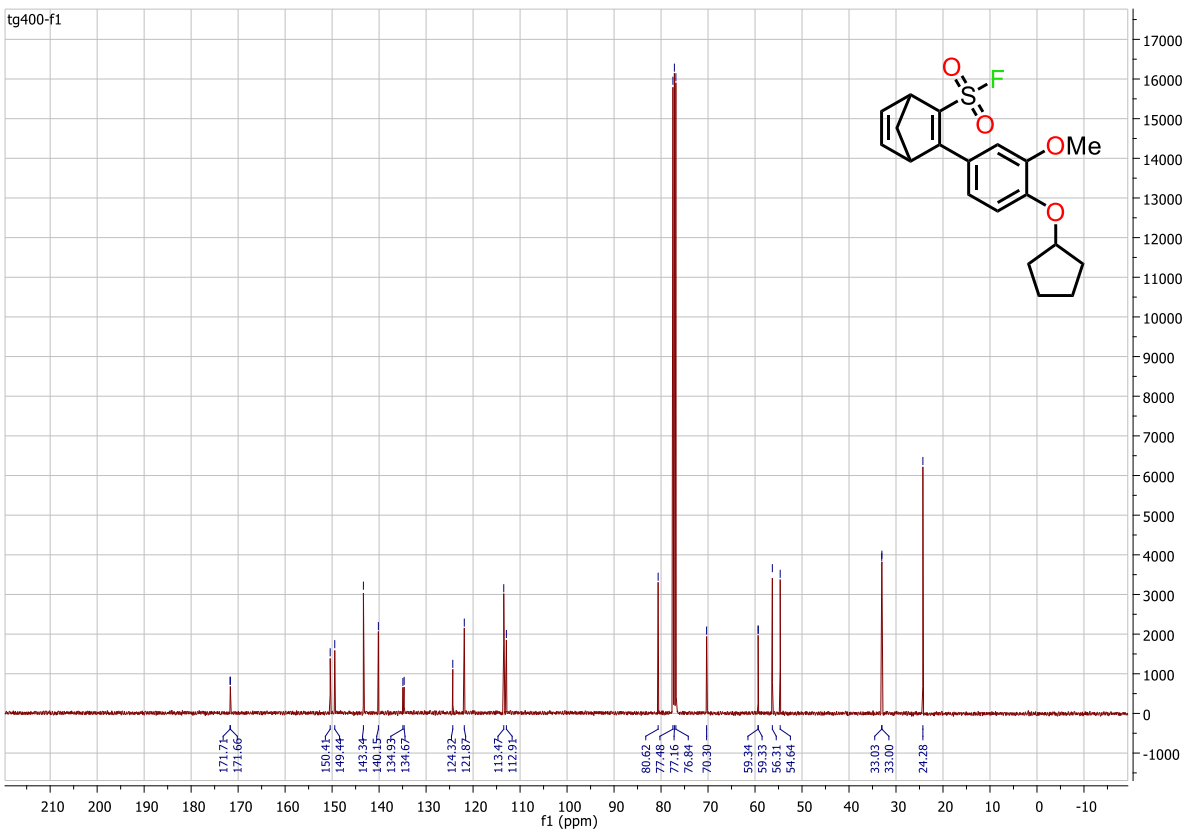

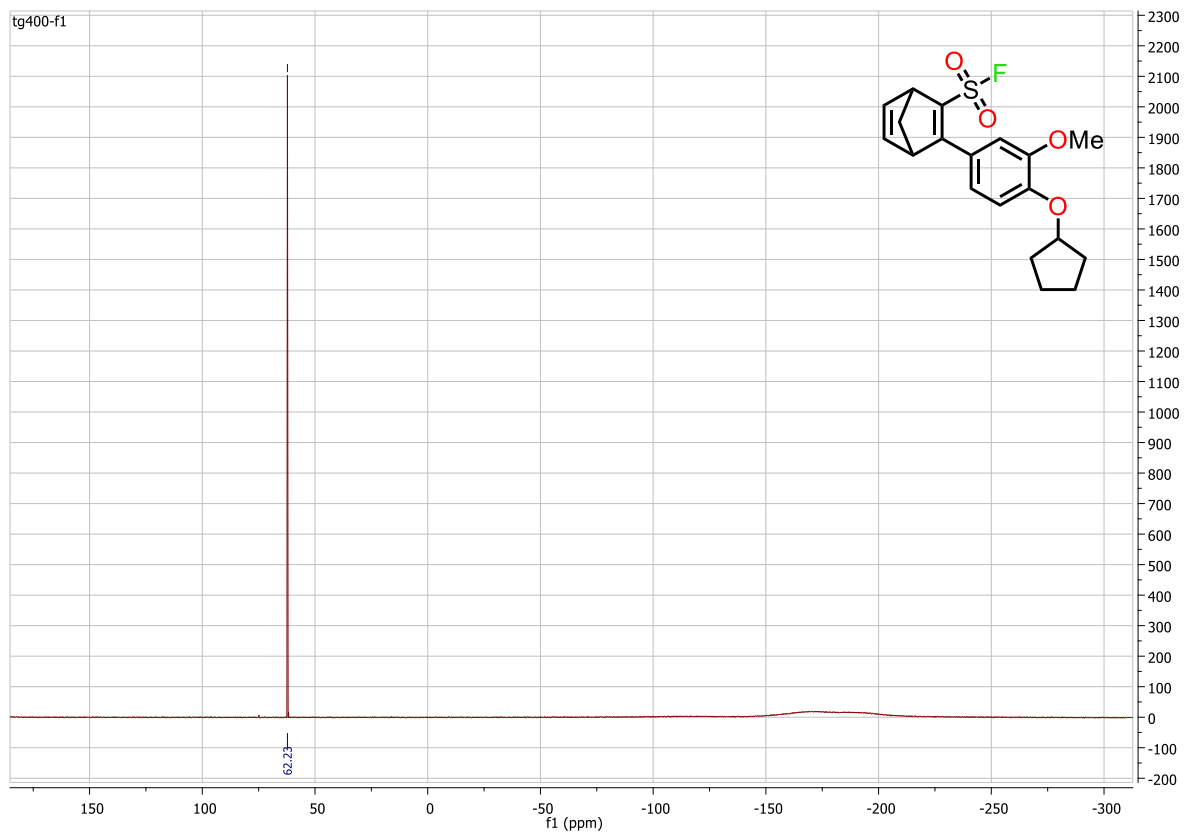

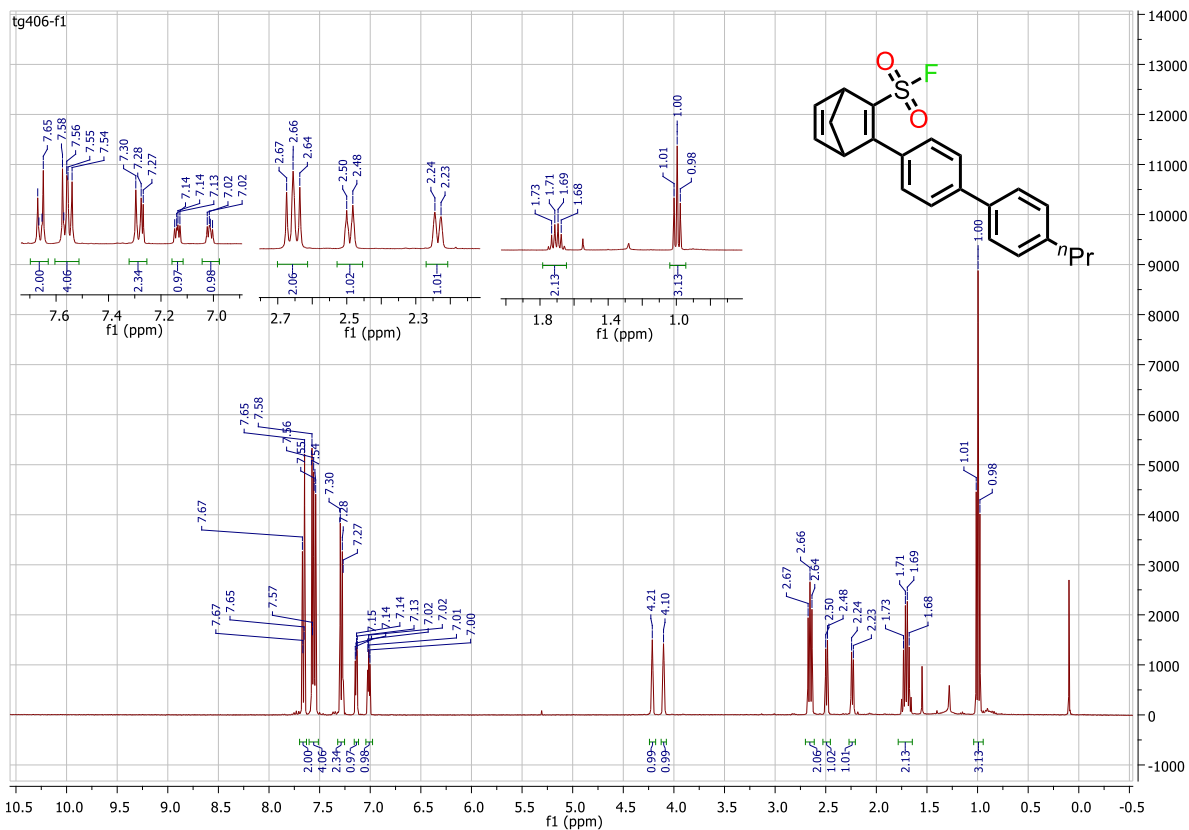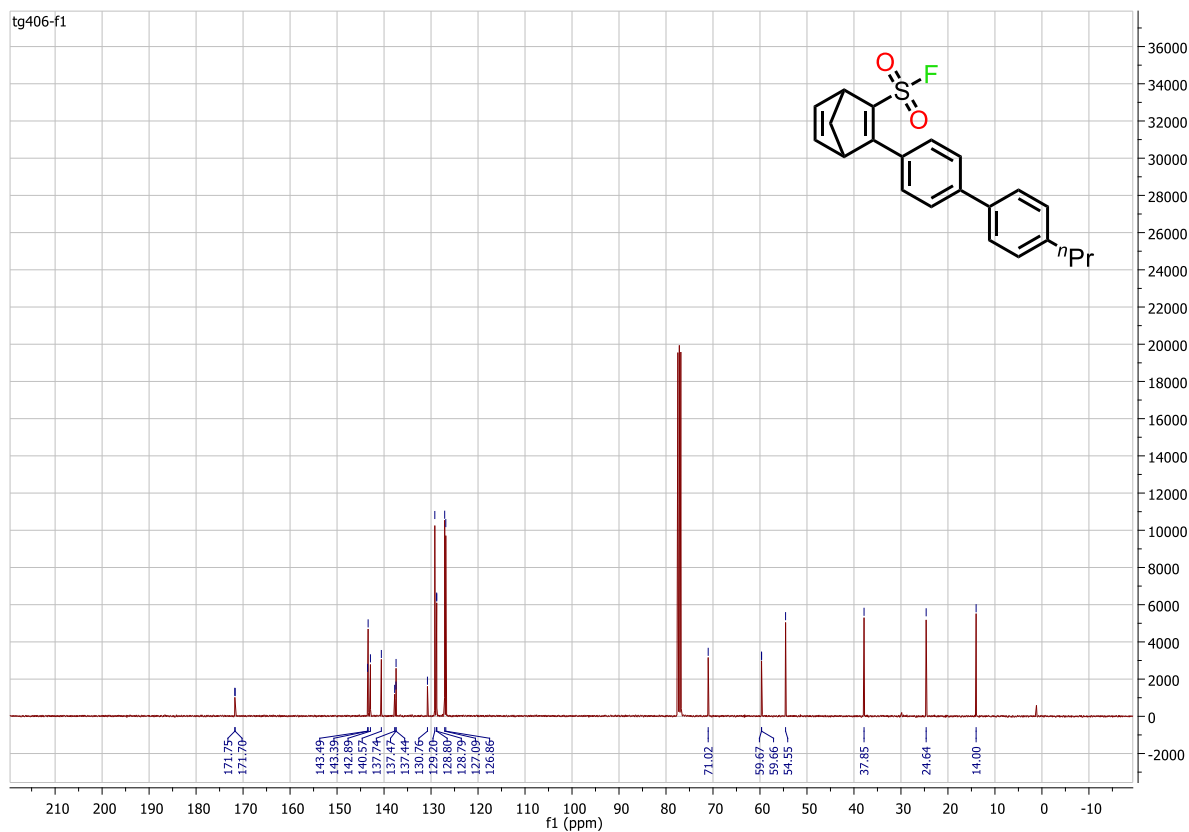

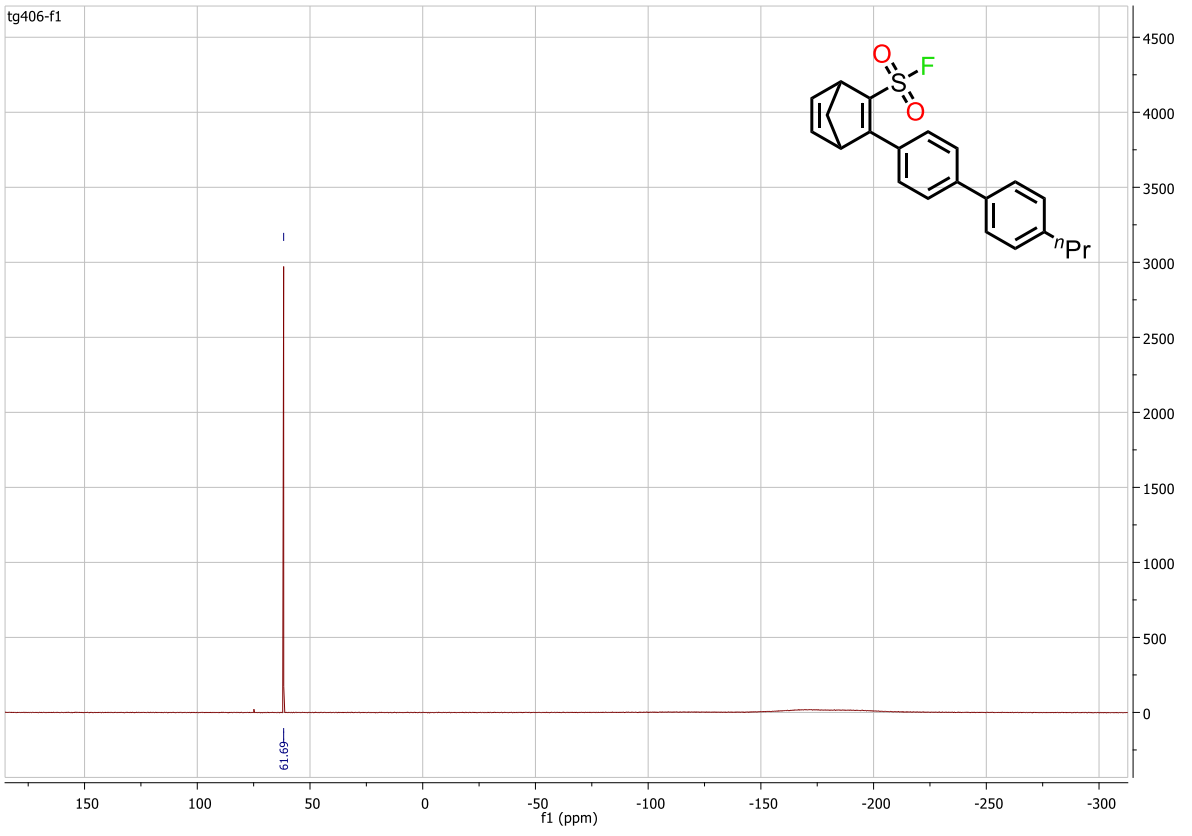

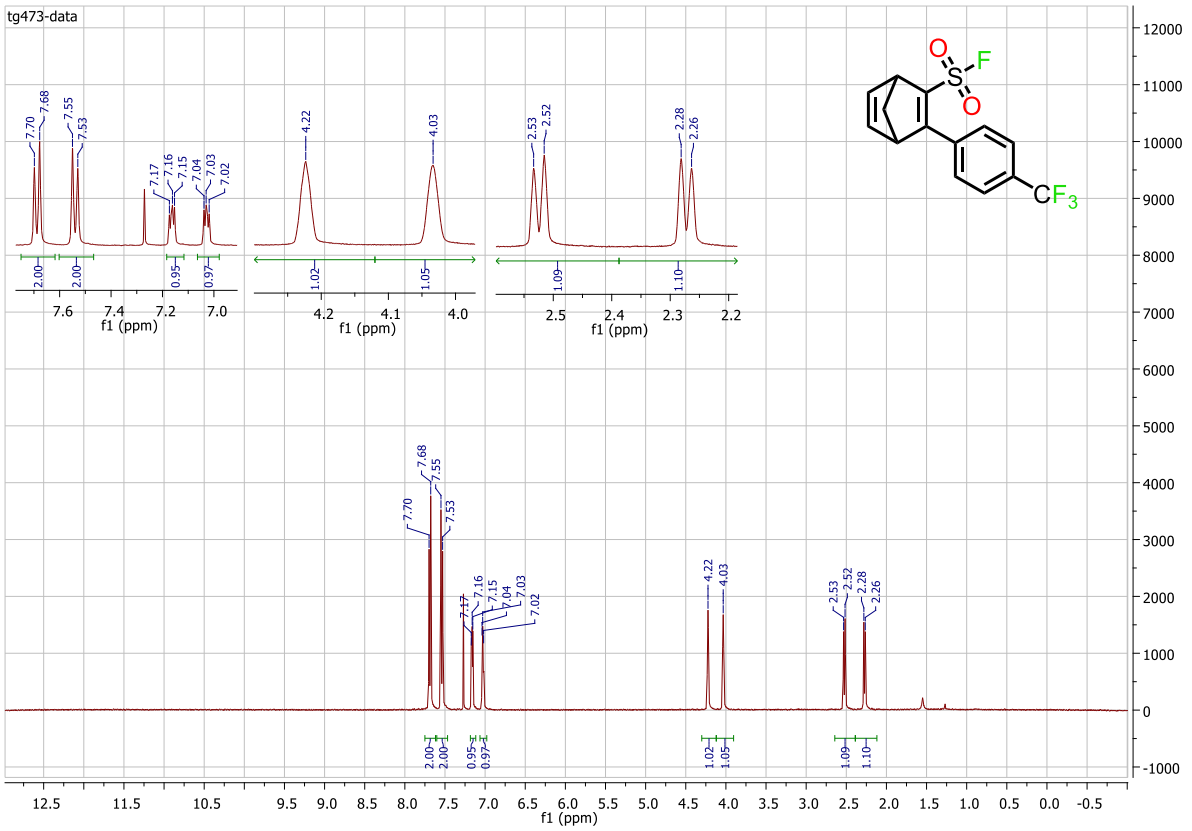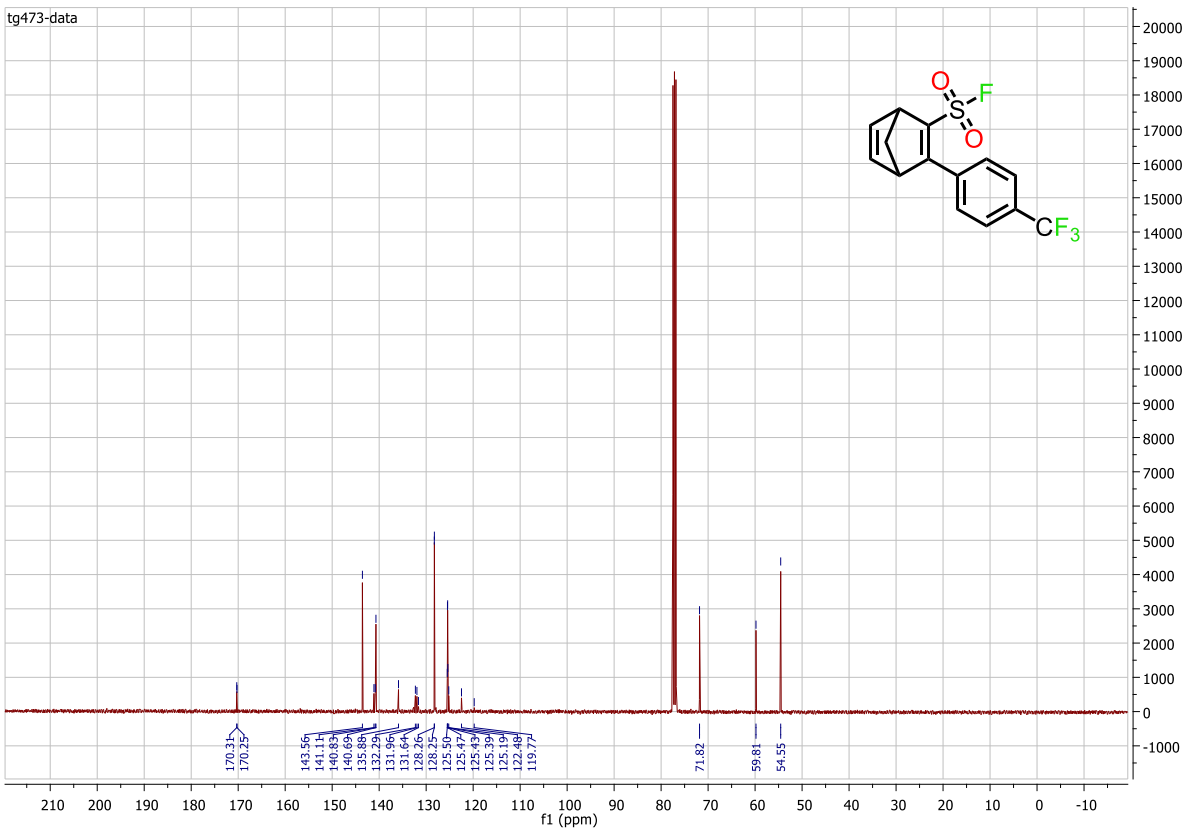

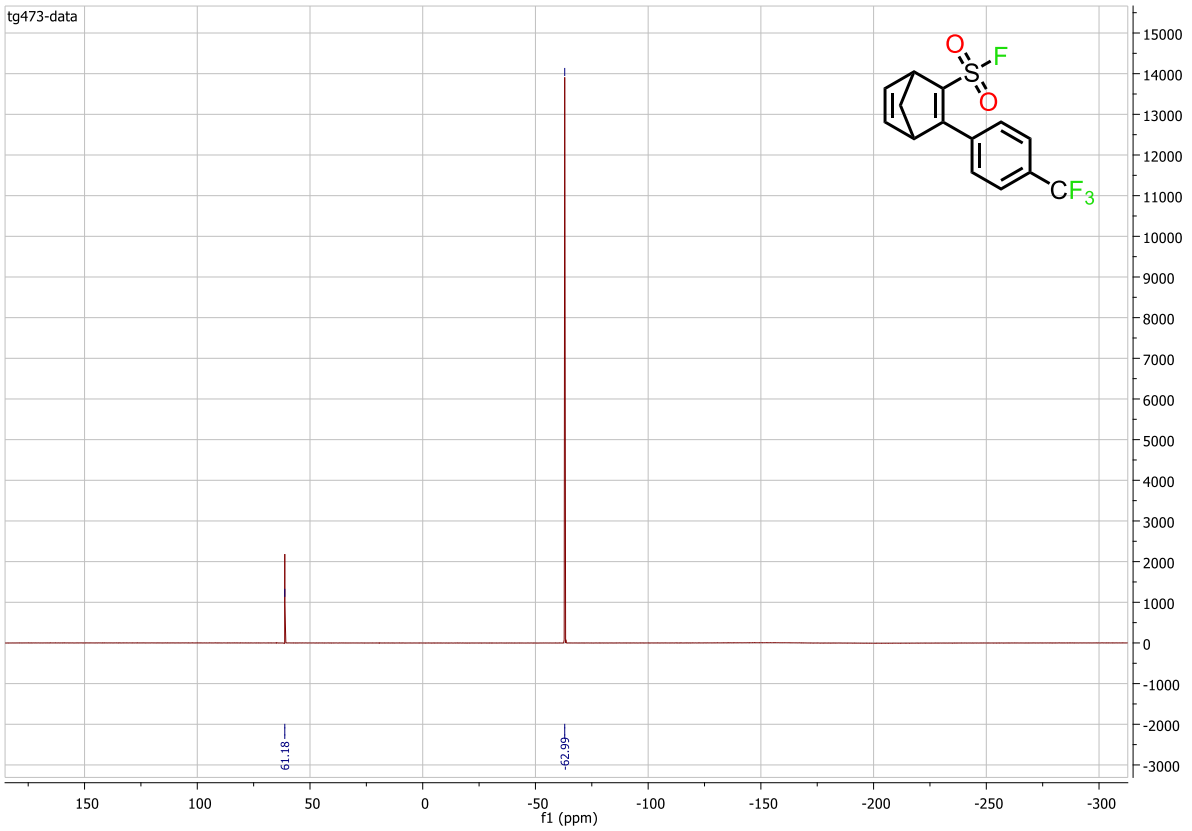

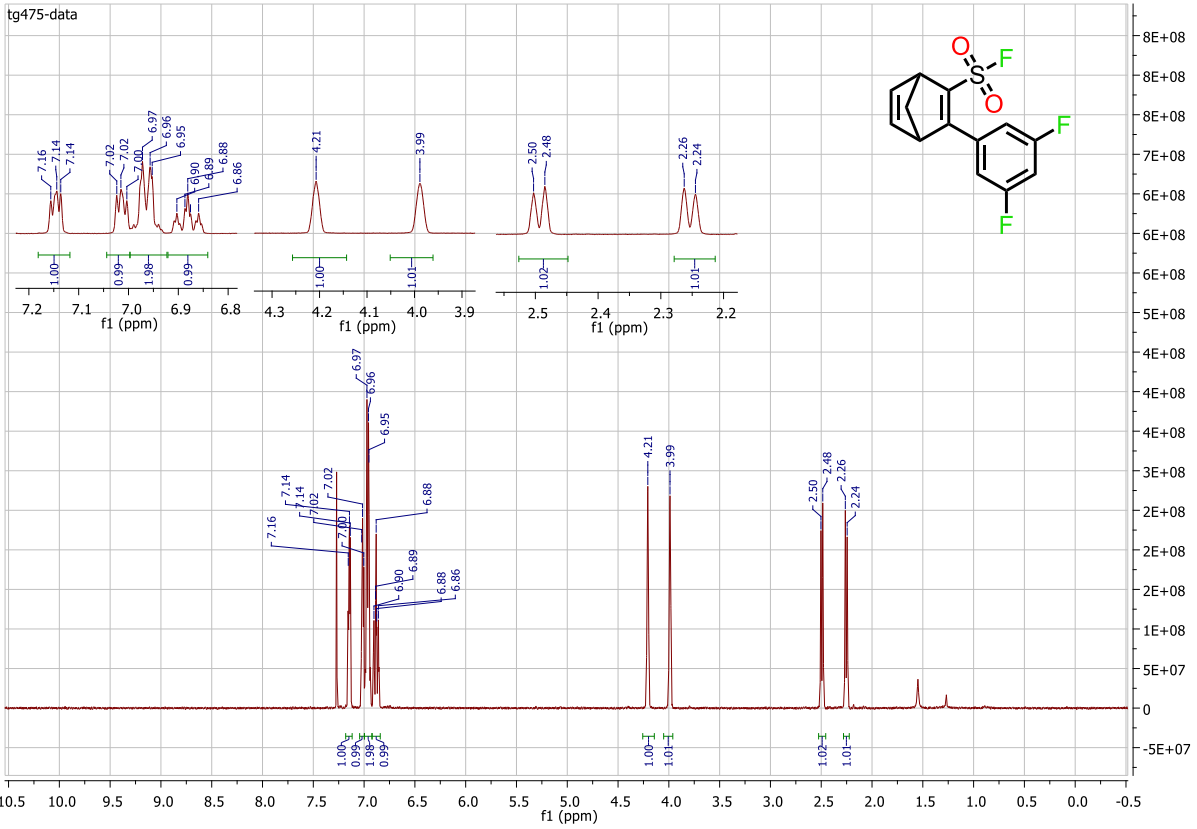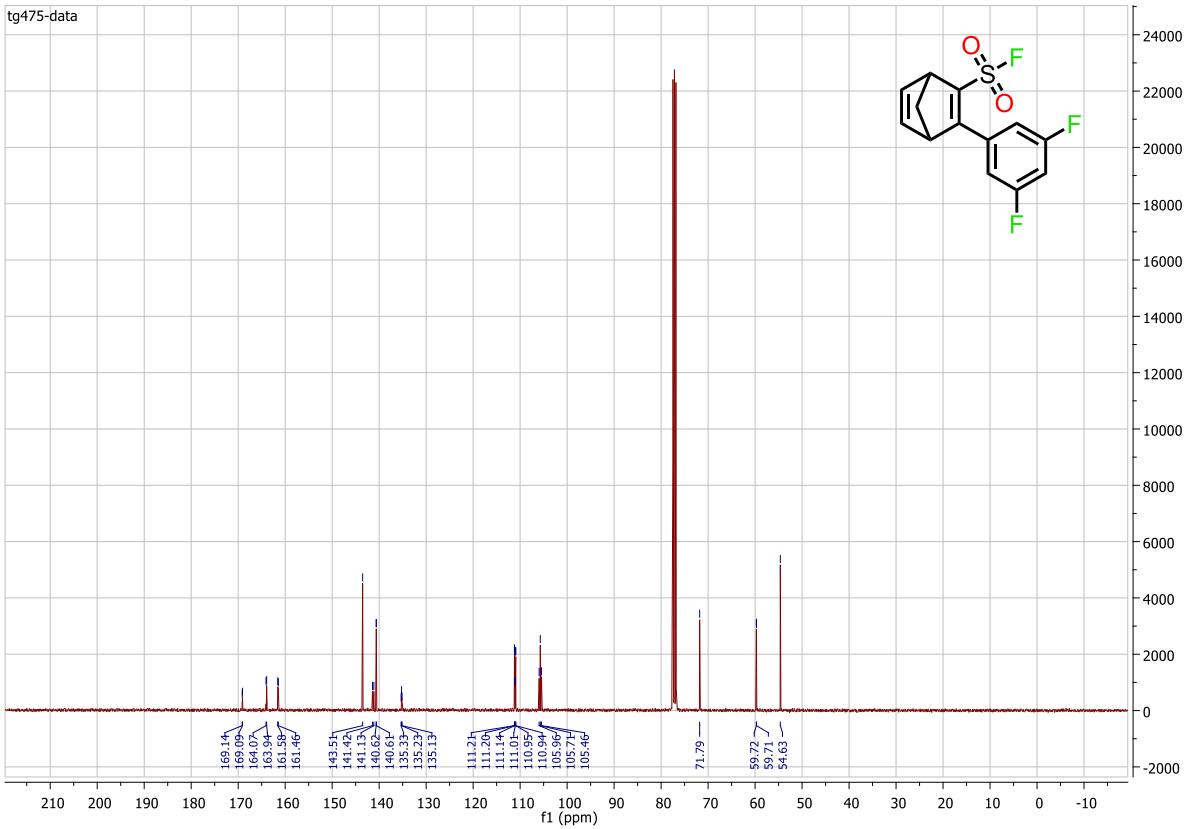



tg475-data

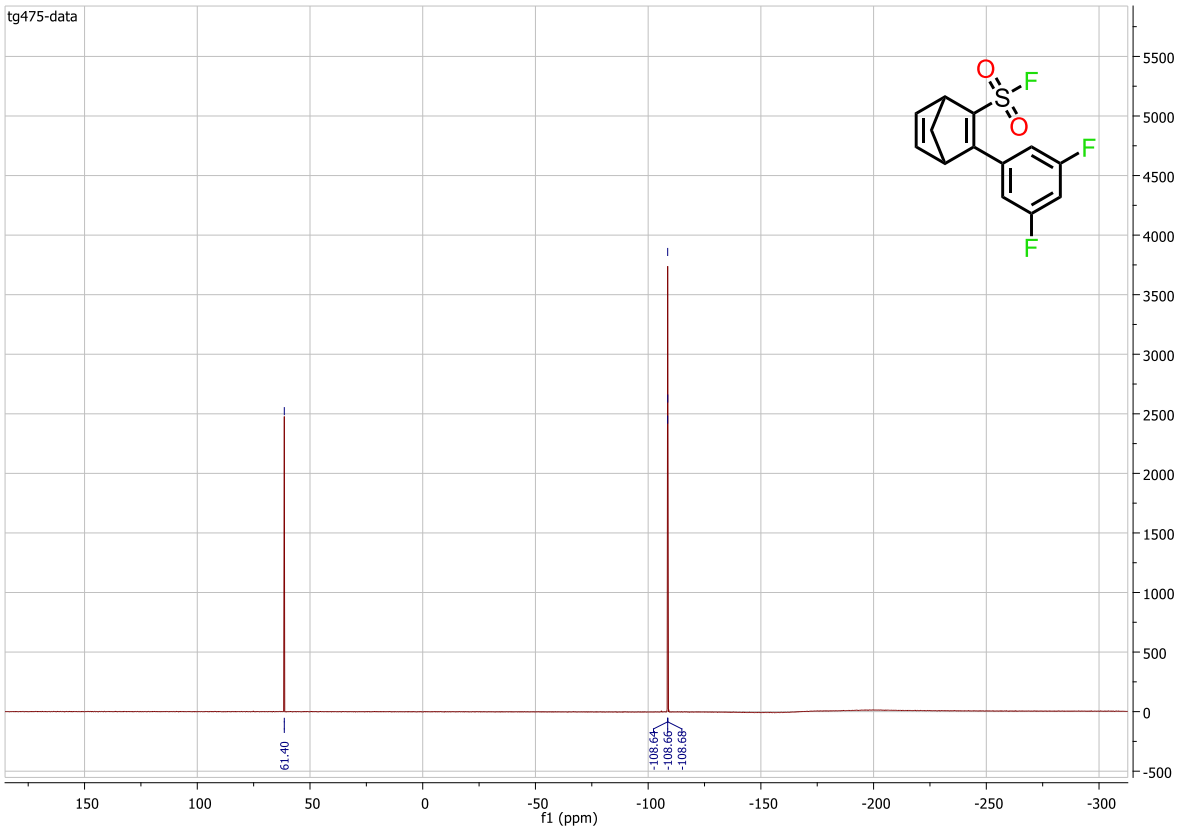

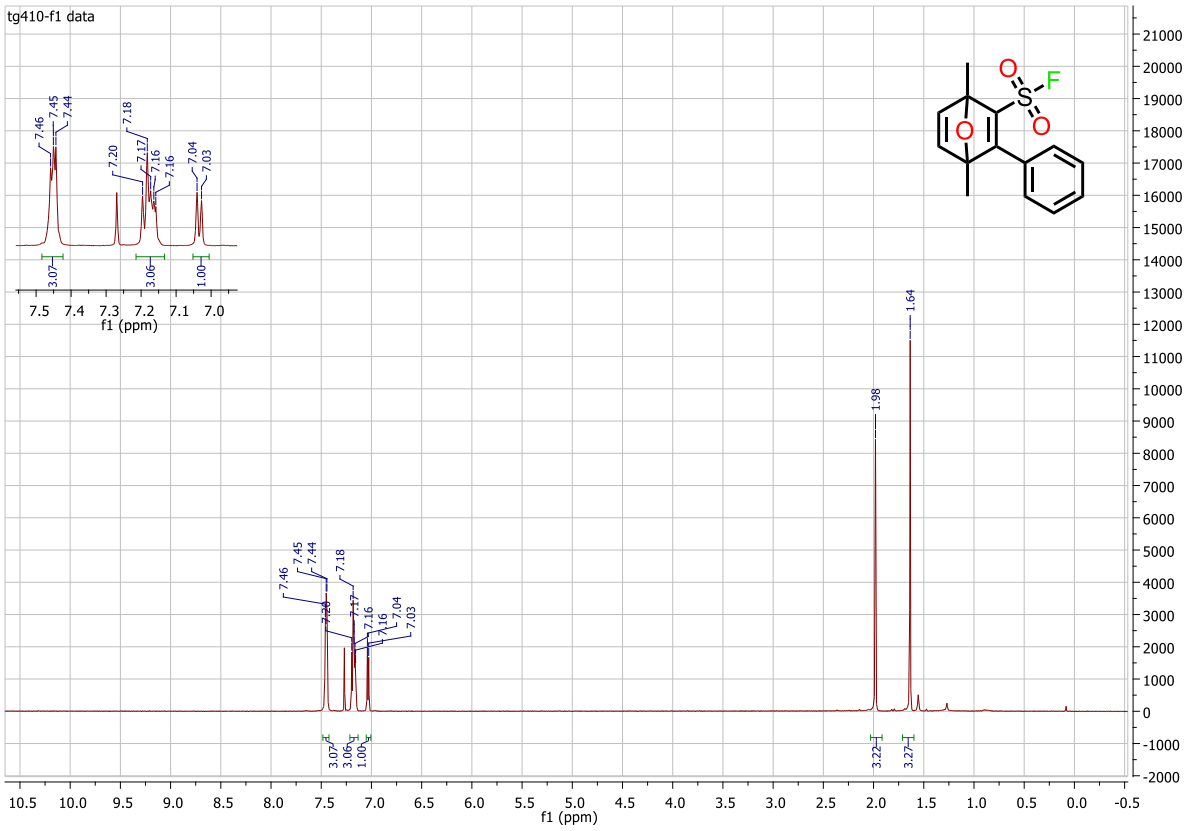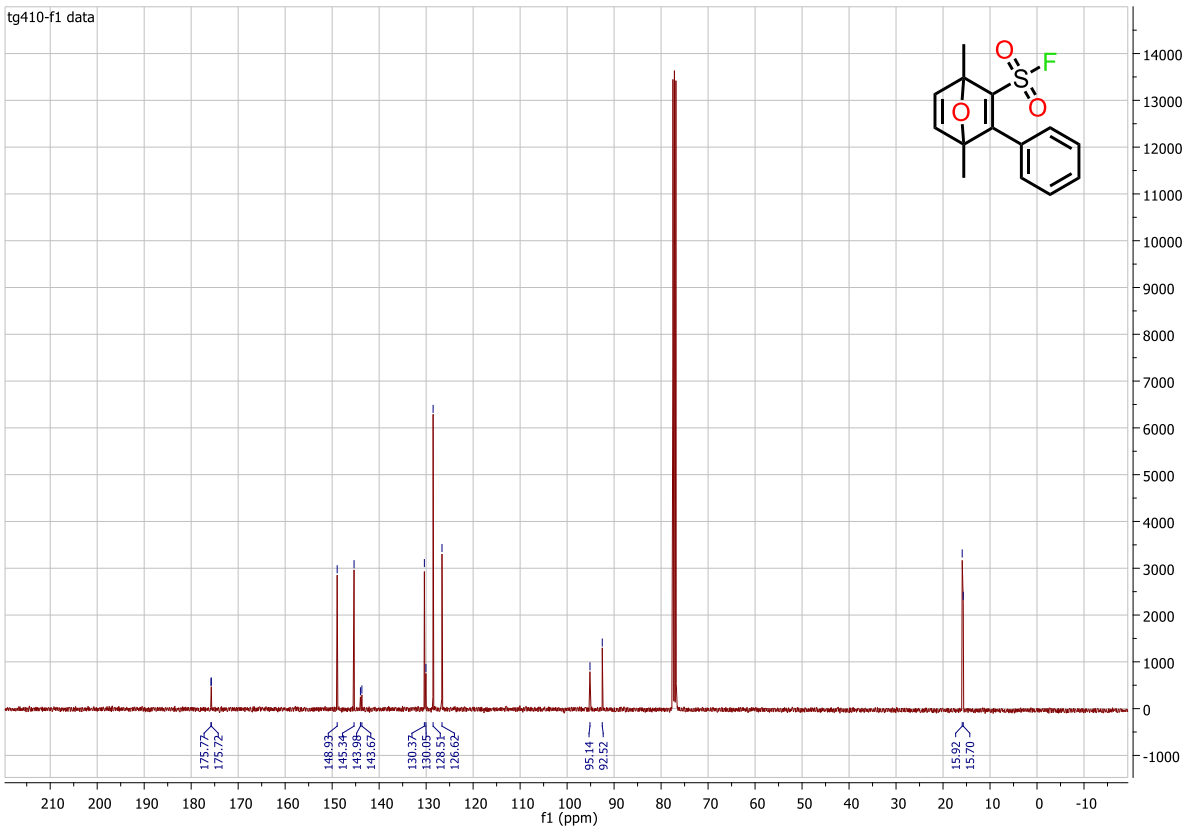

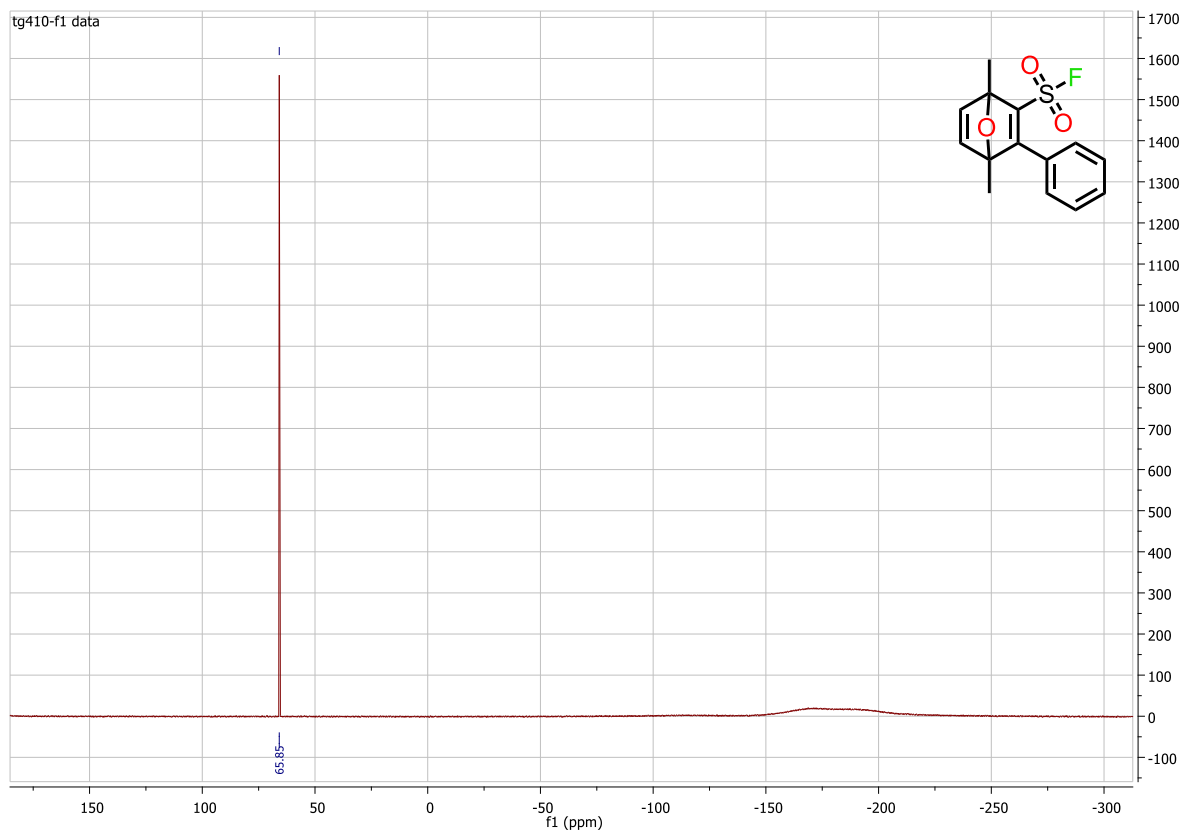

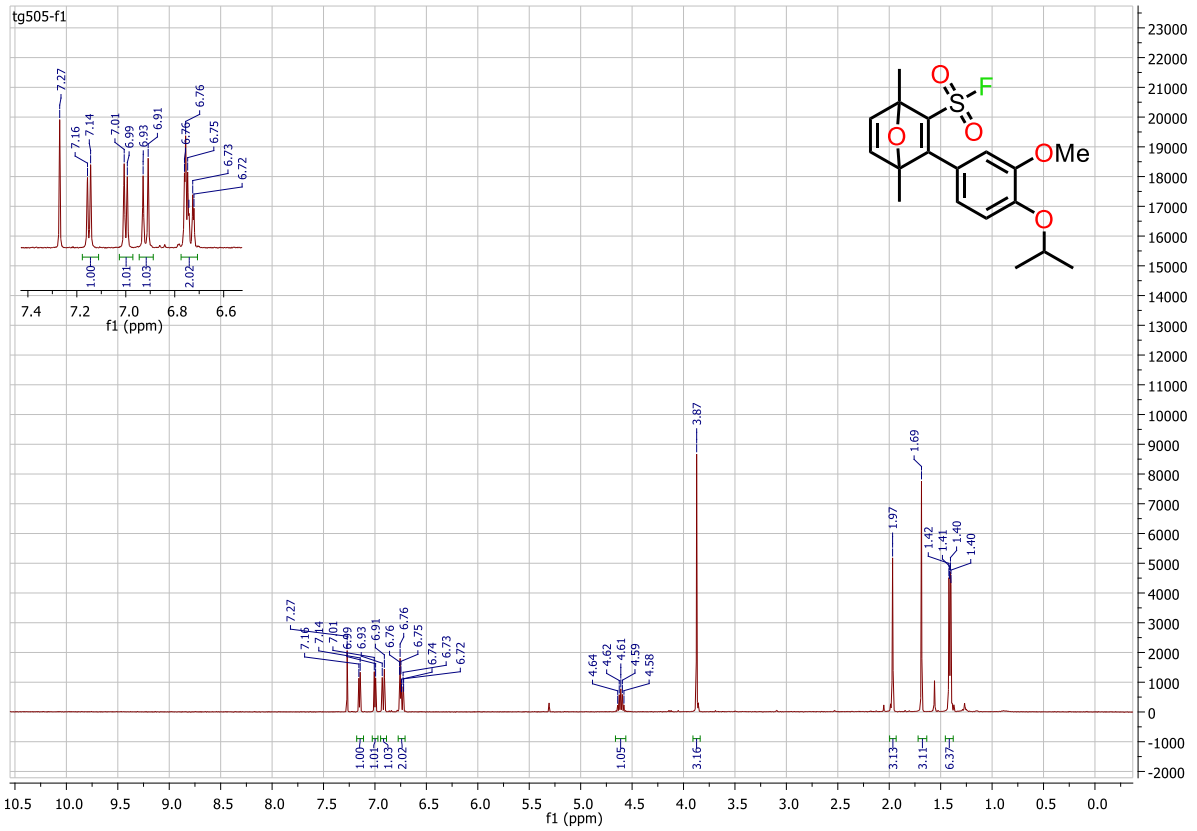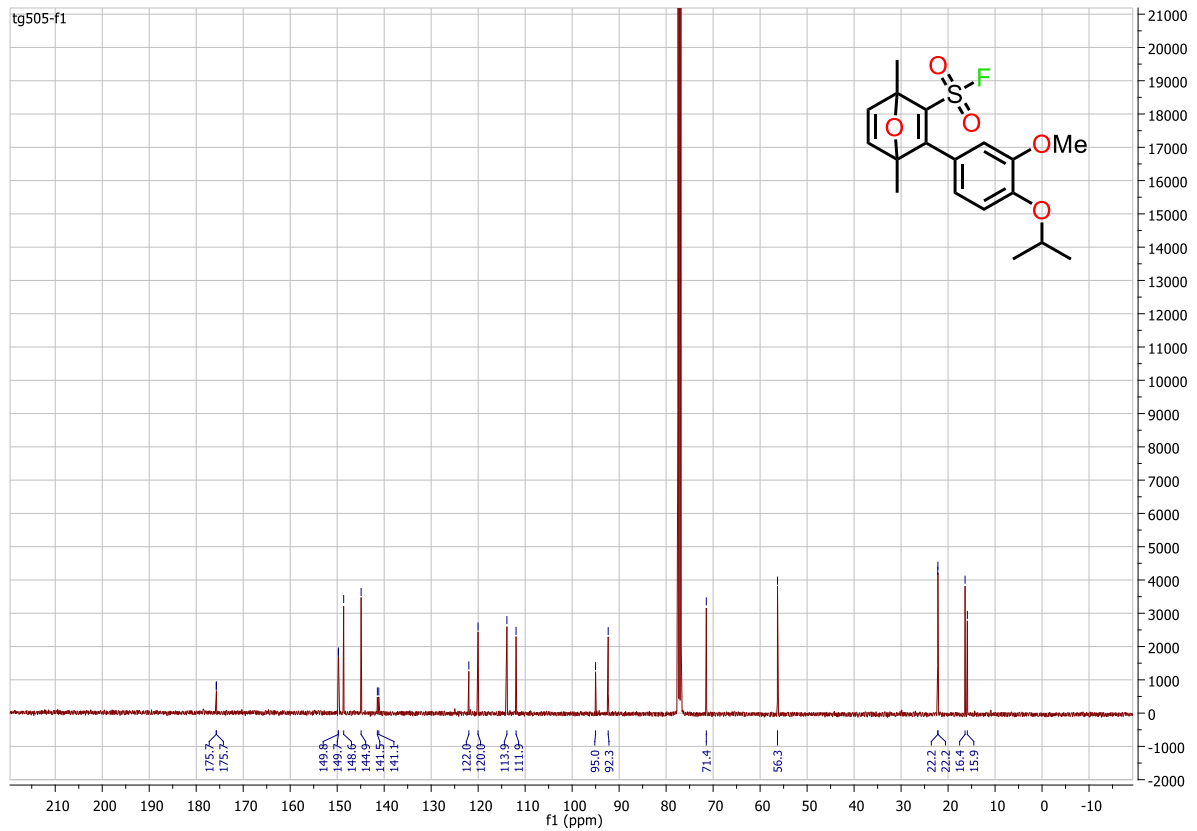

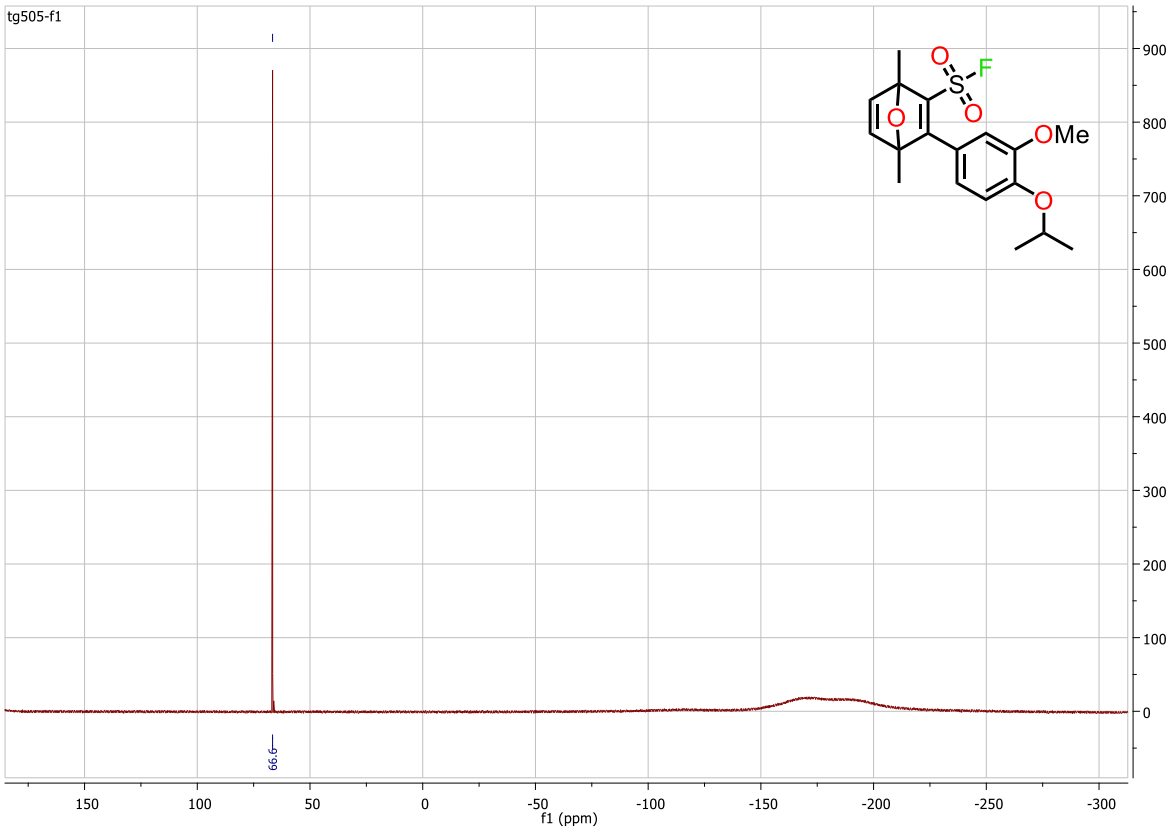

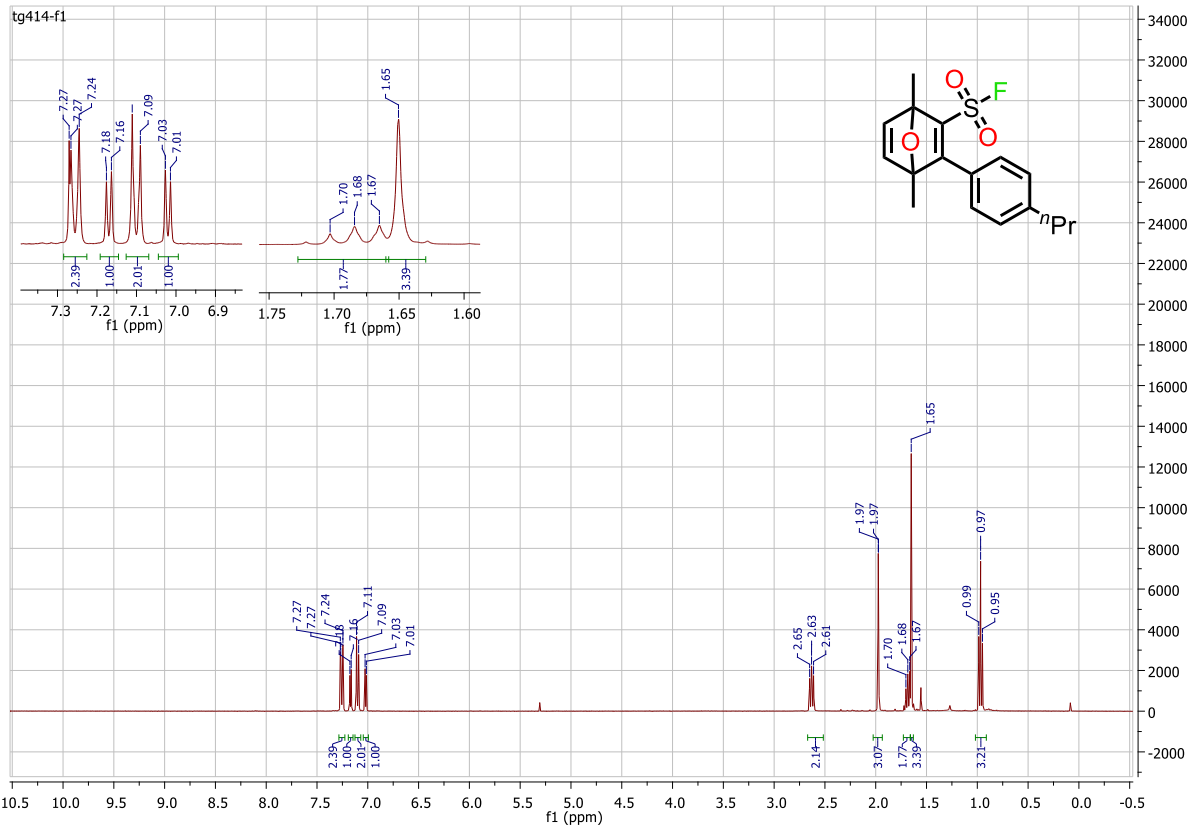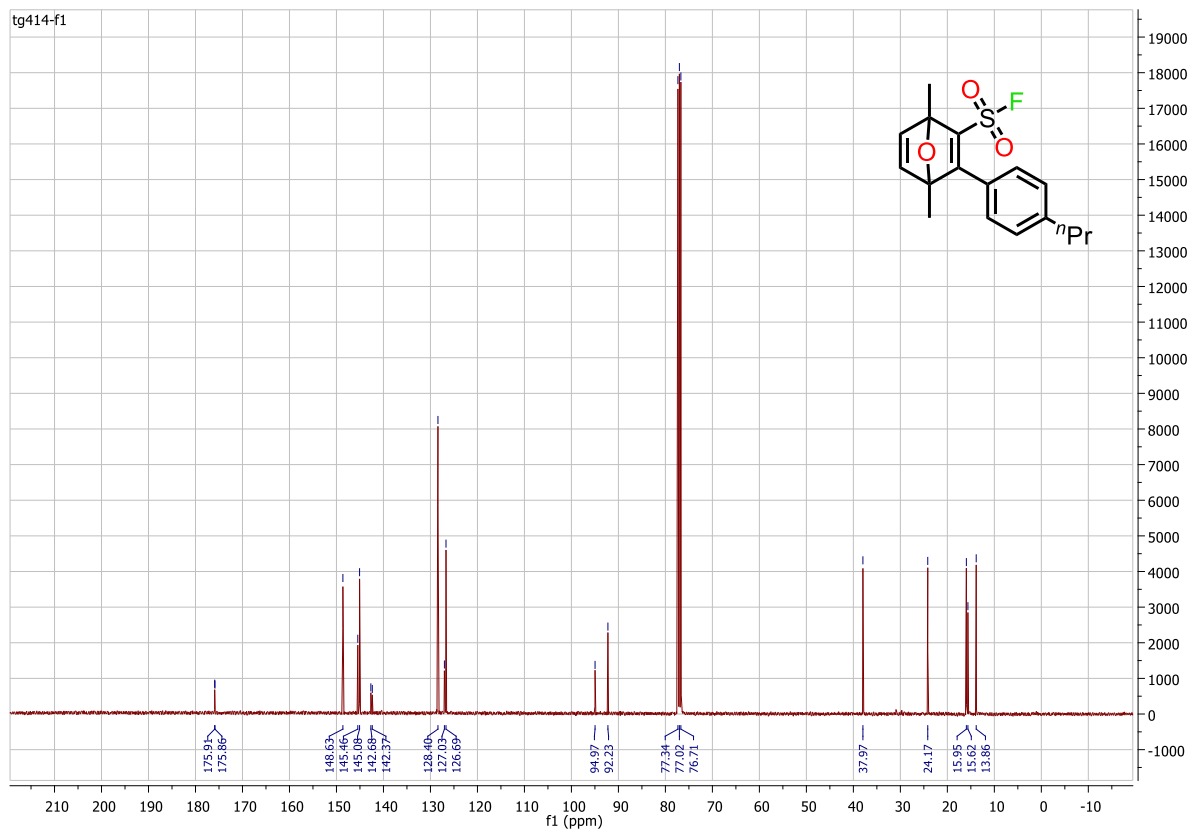

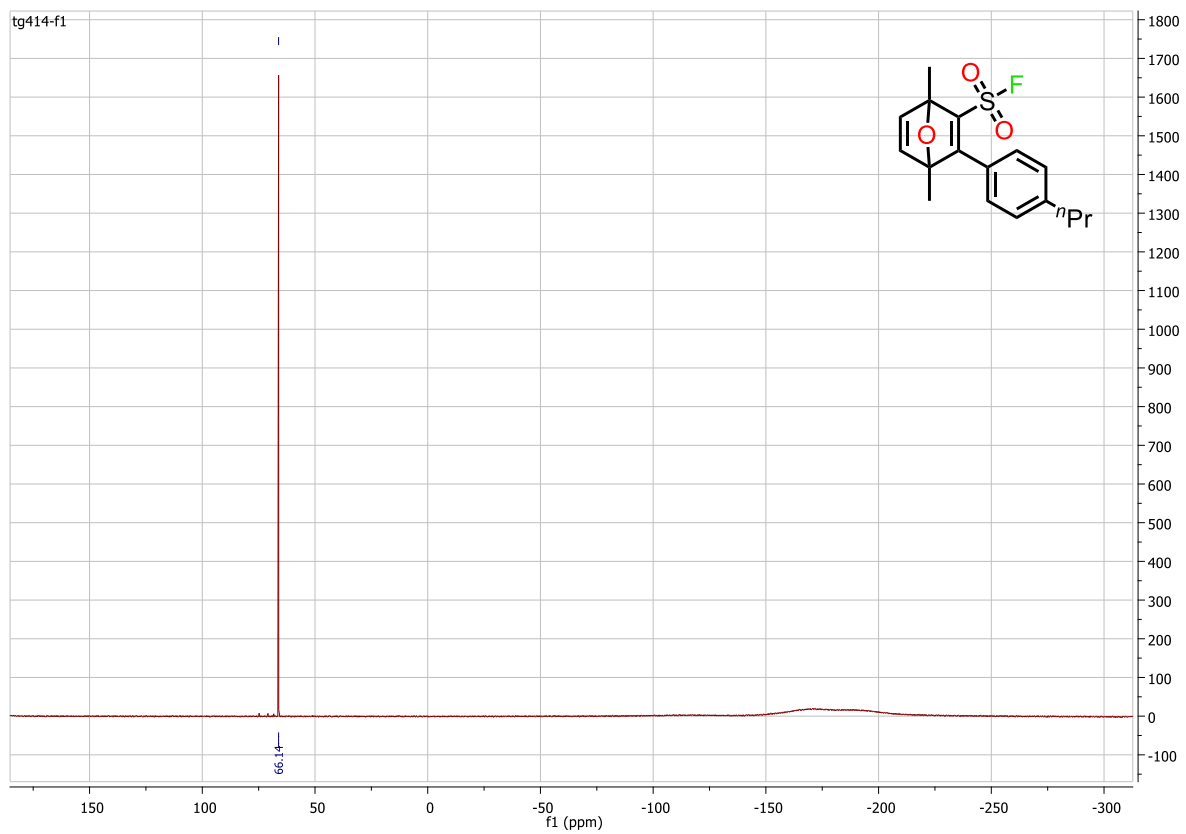

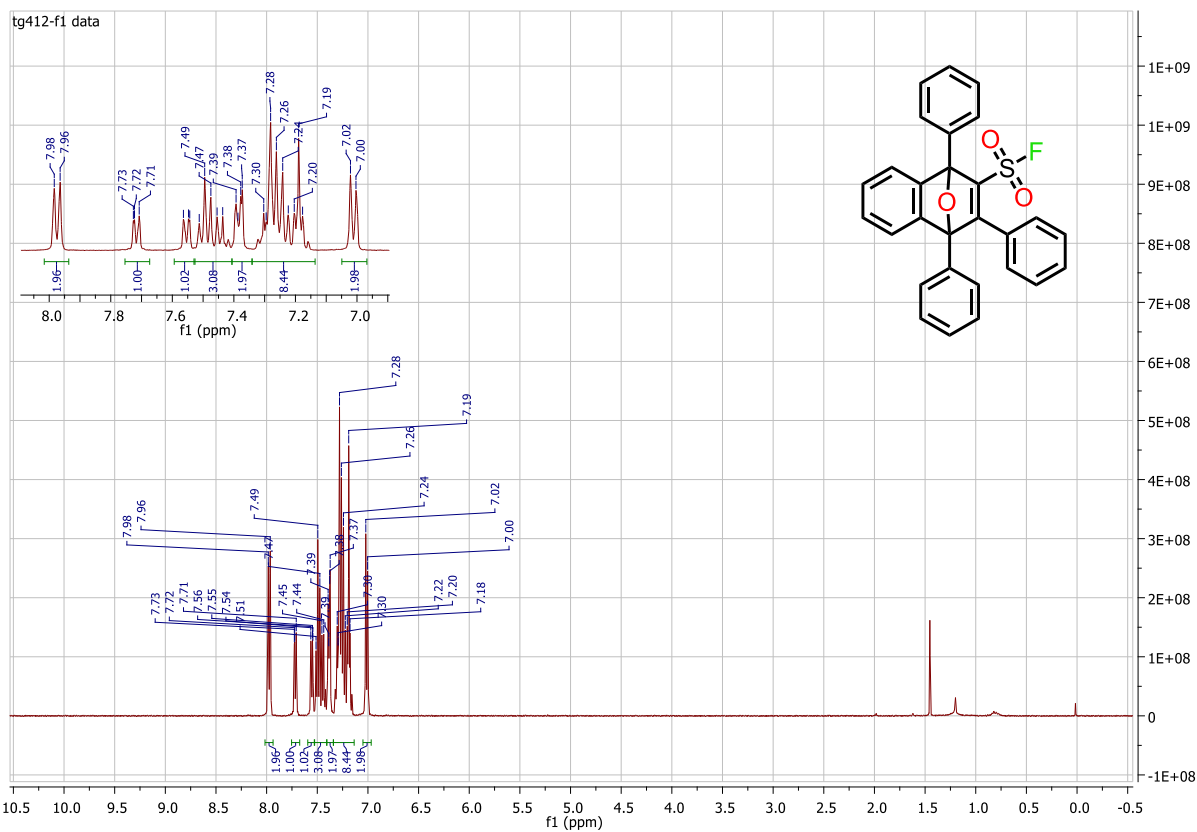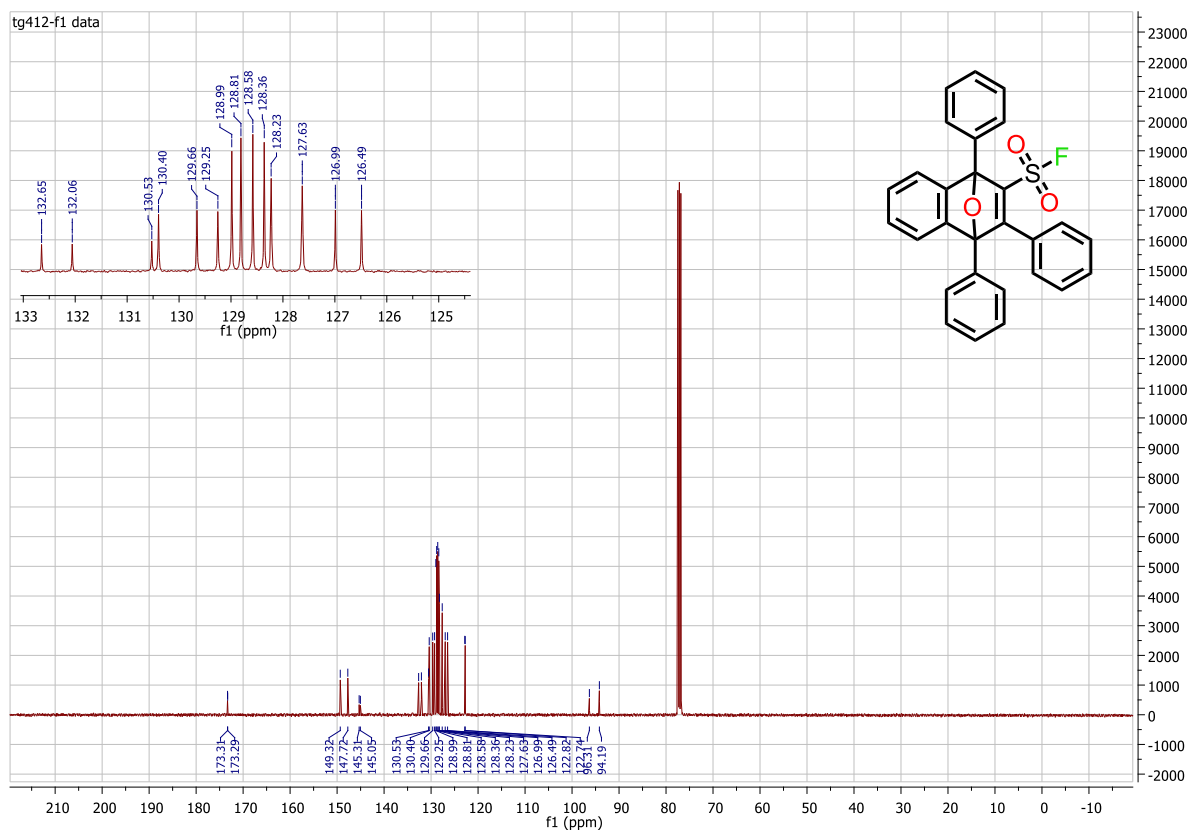



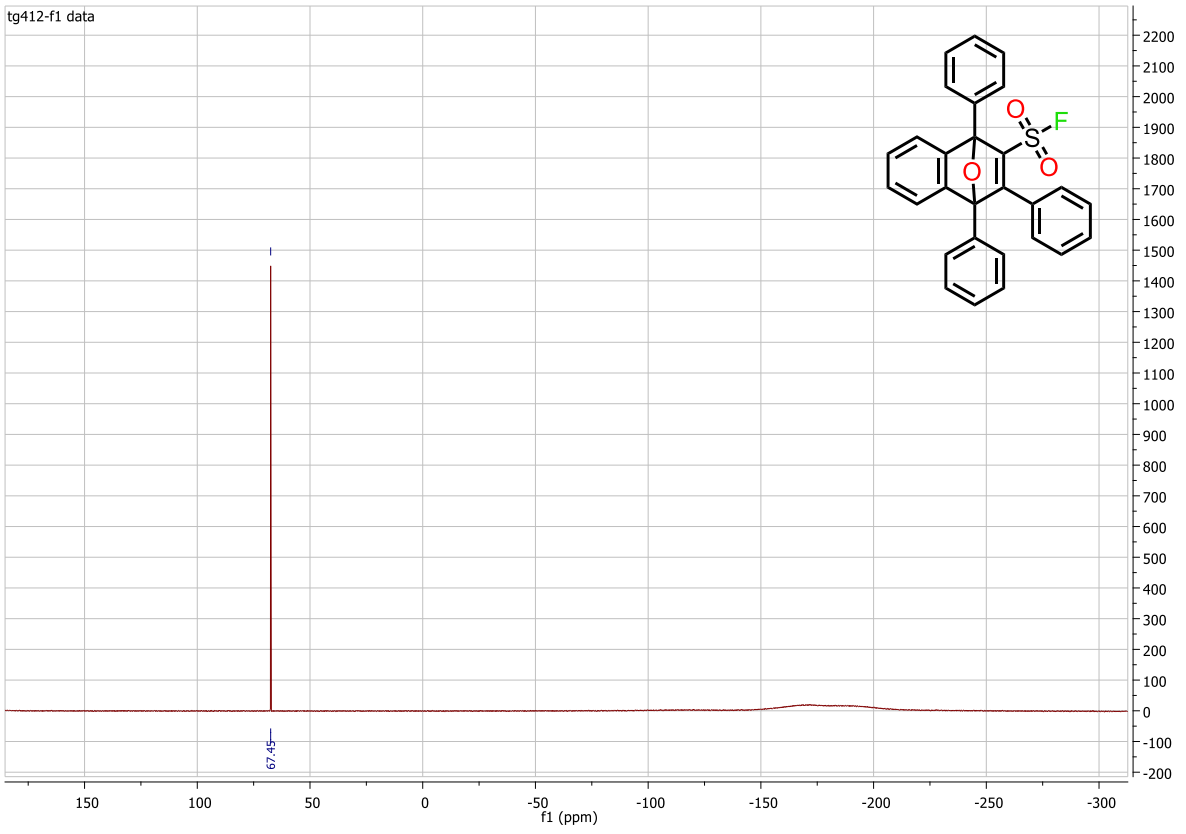

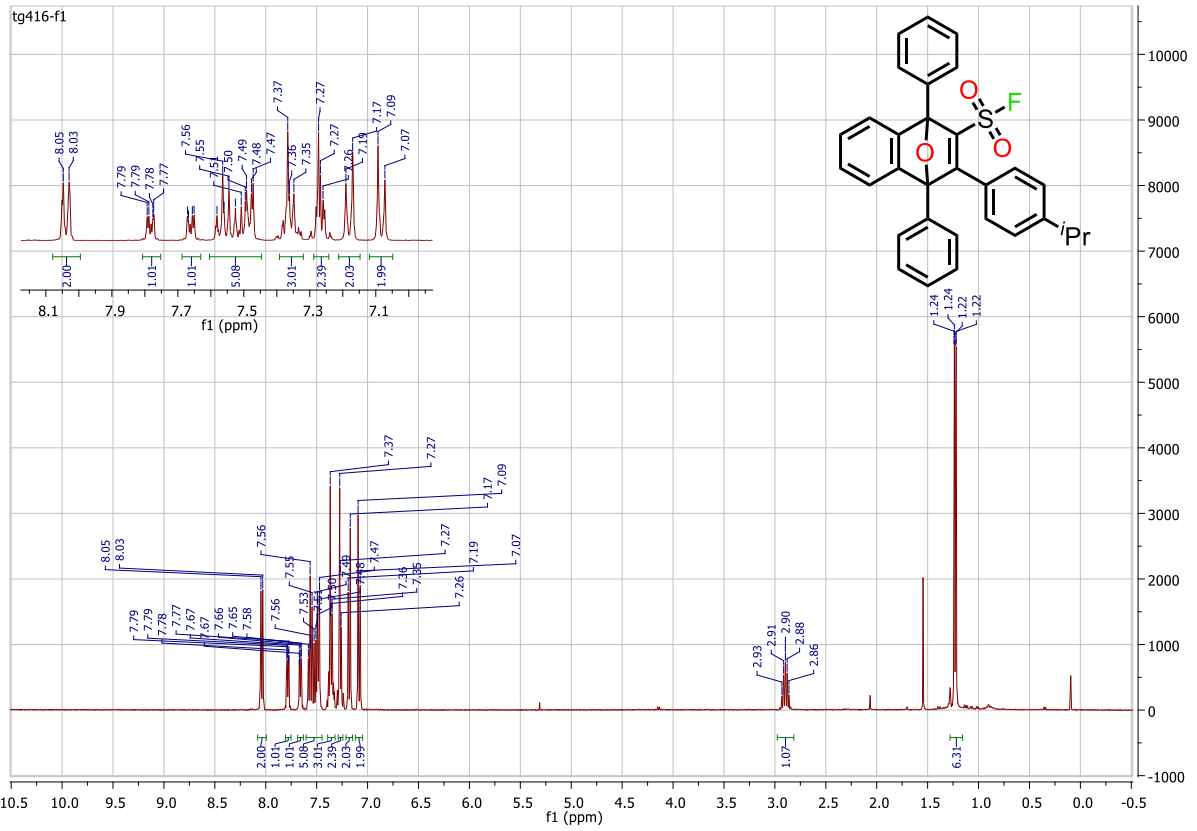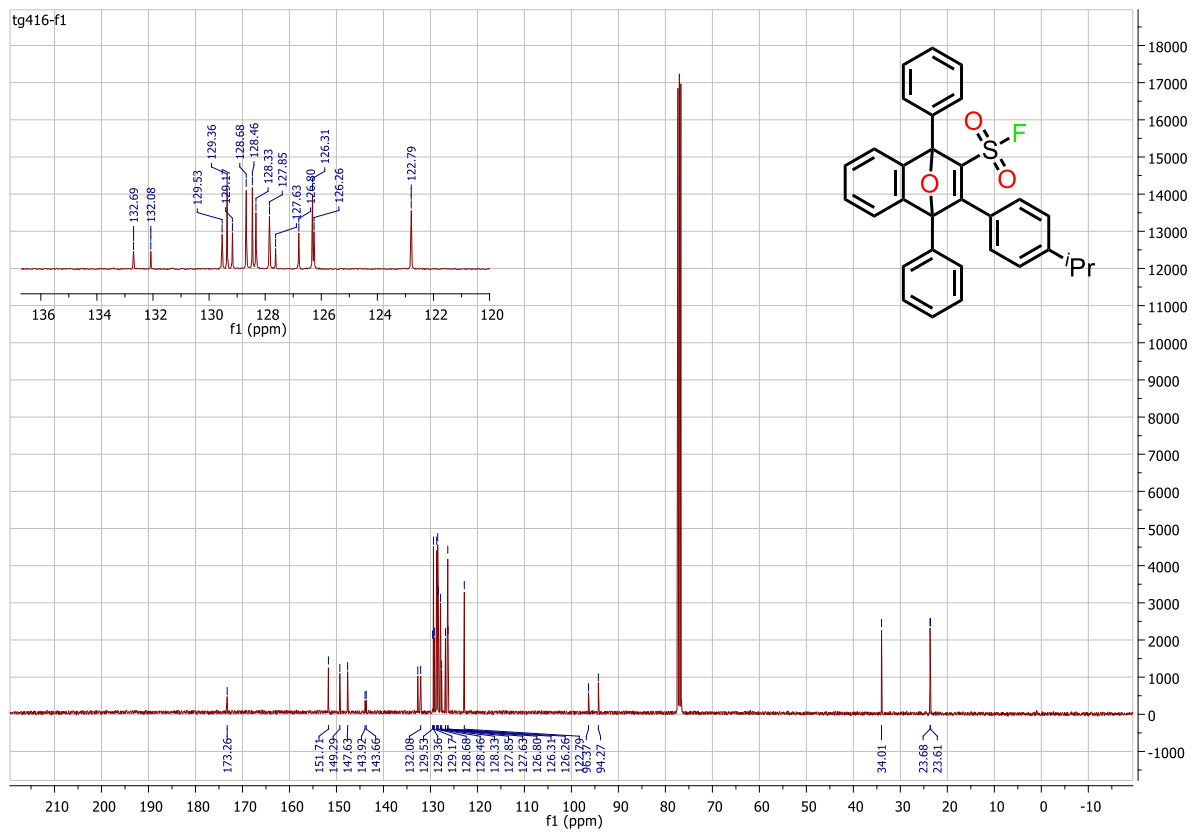

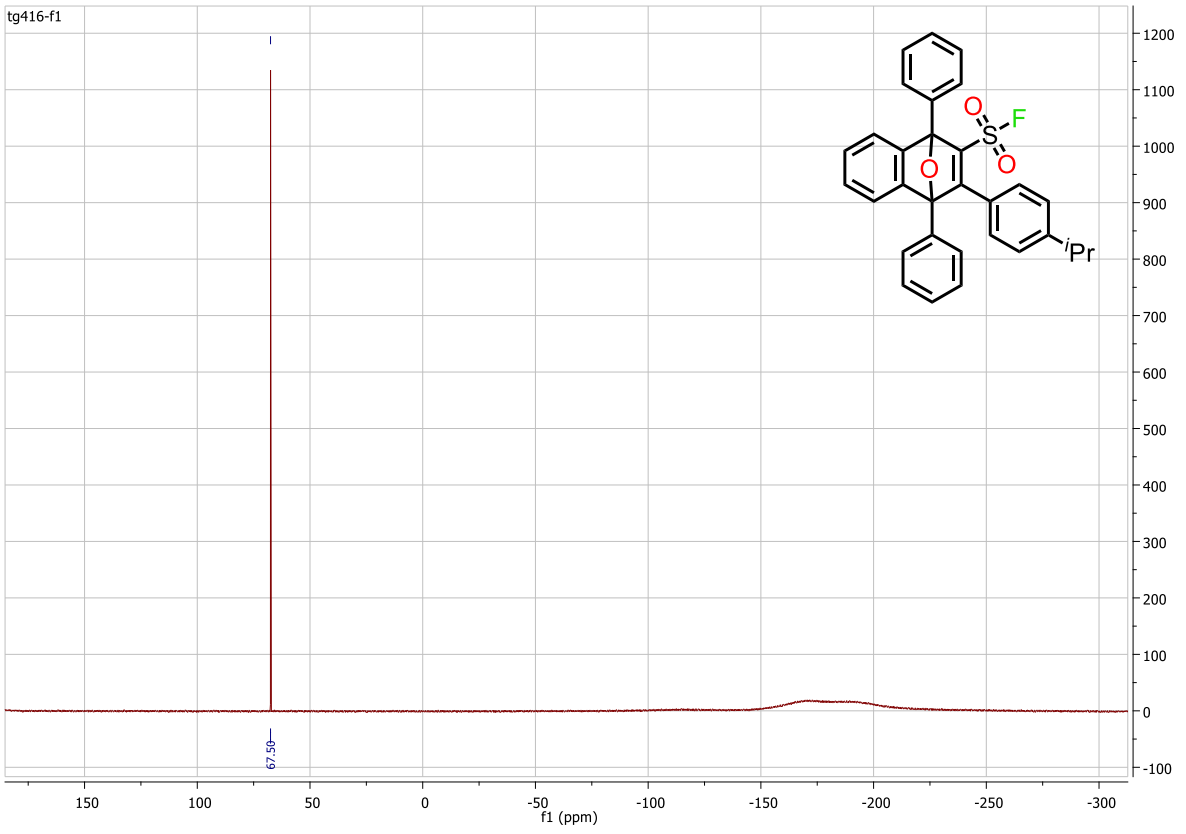

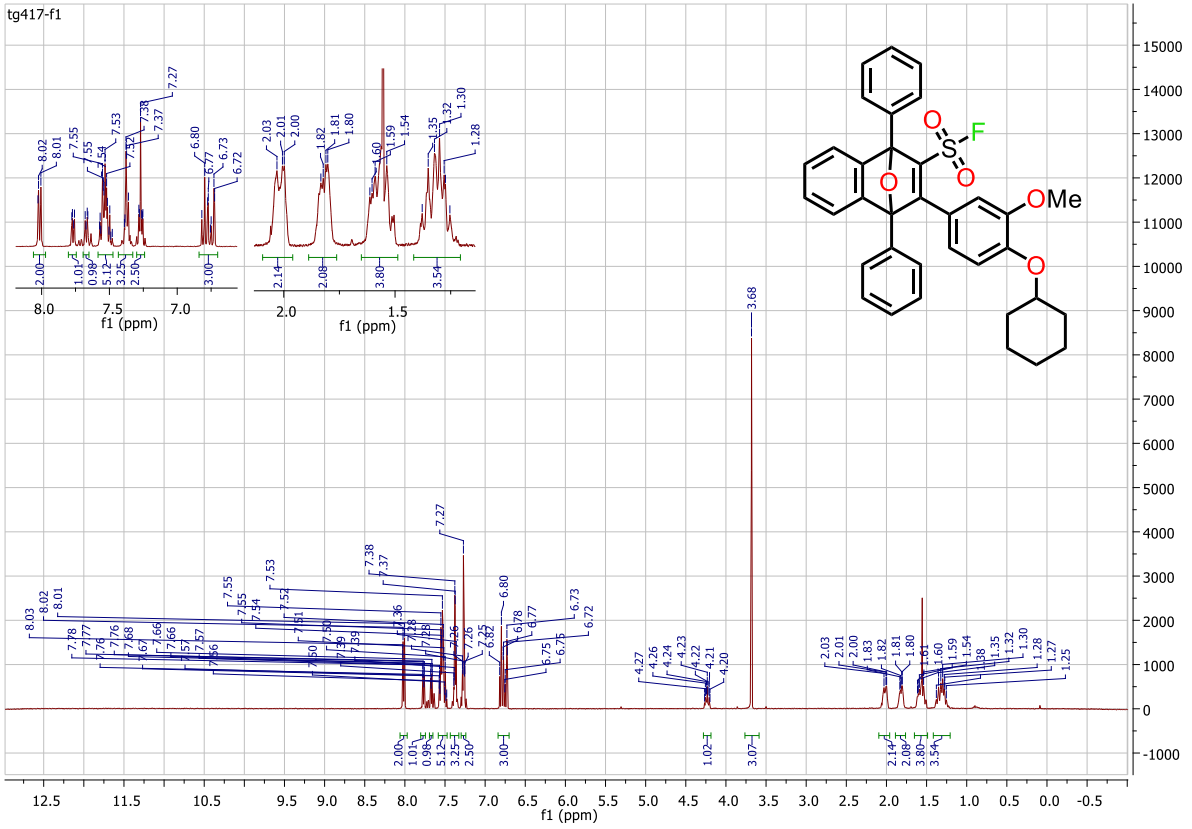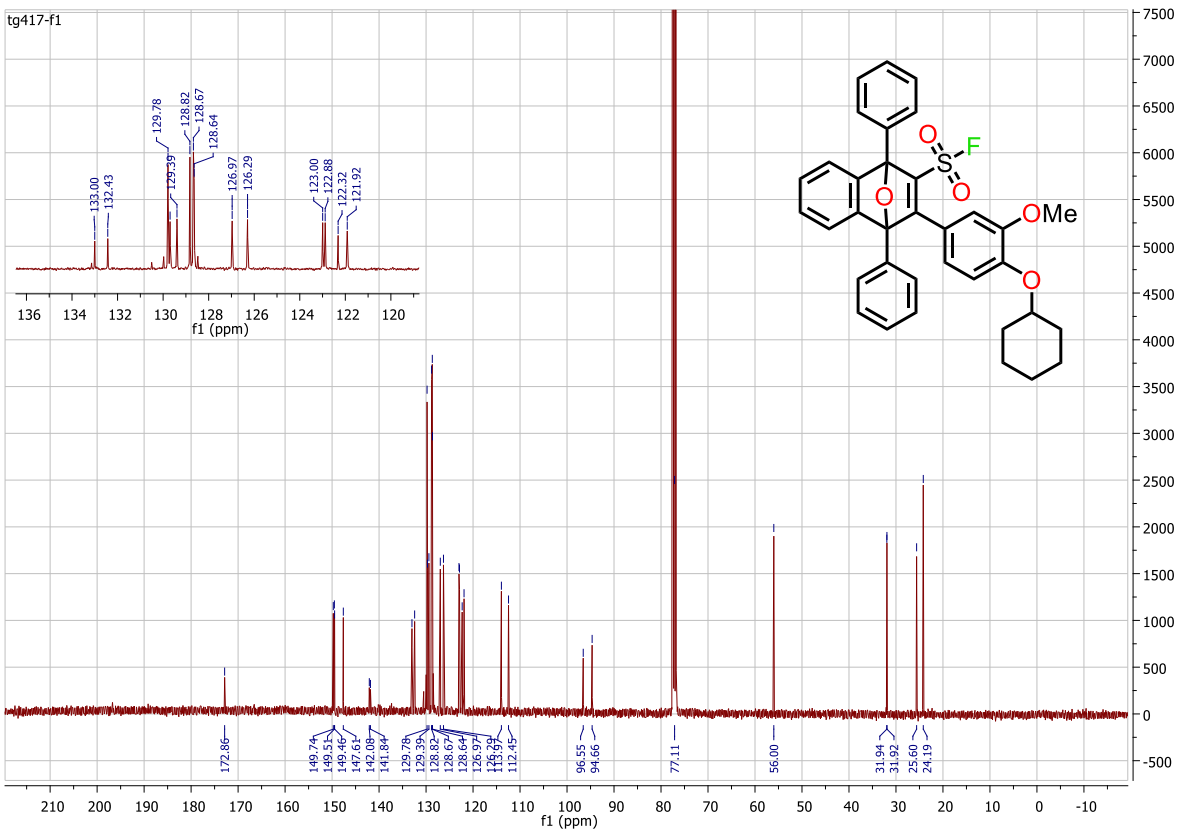

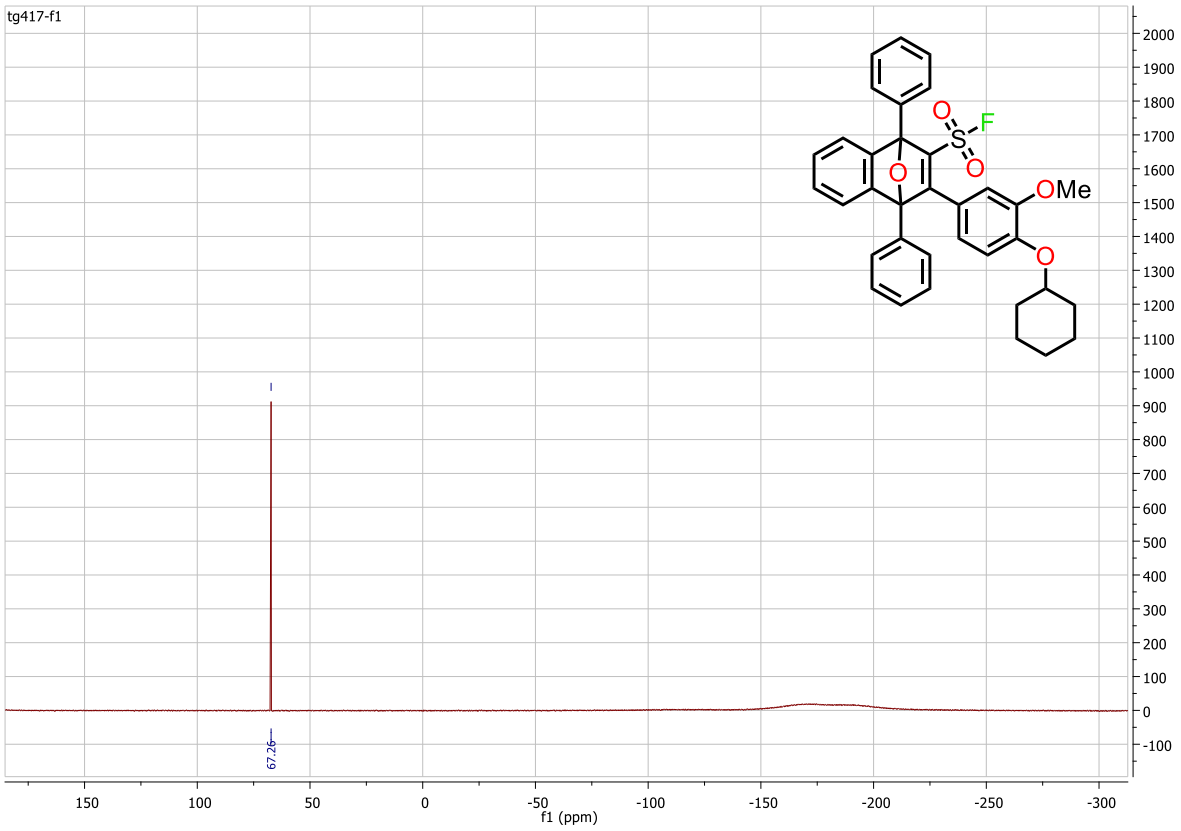

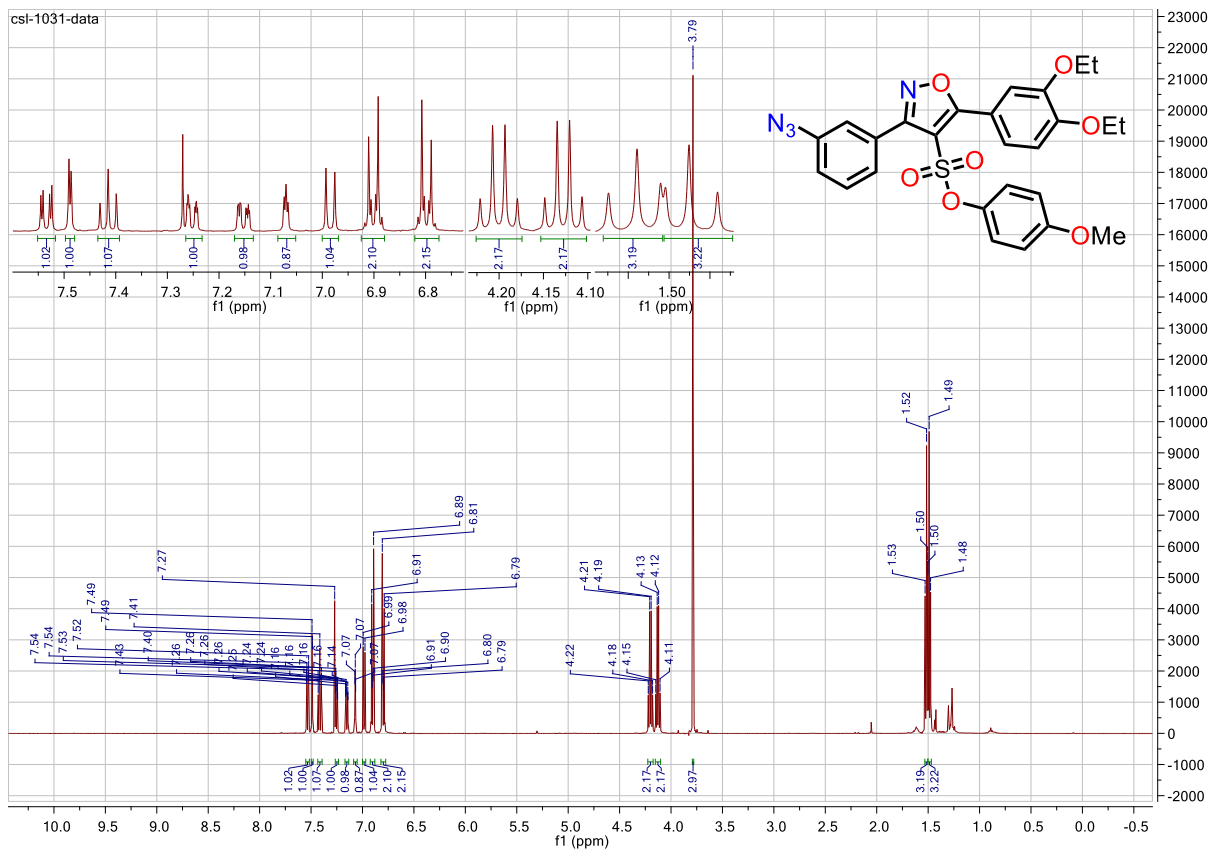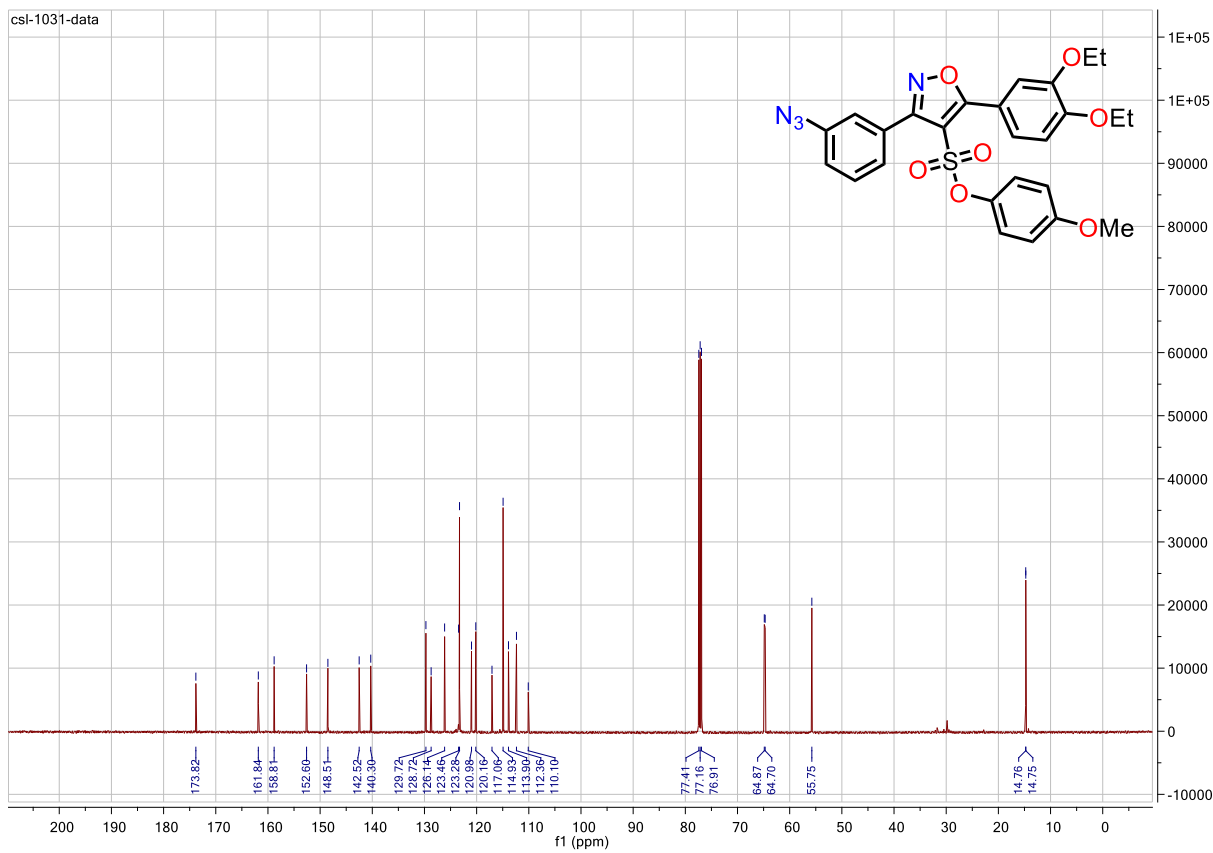



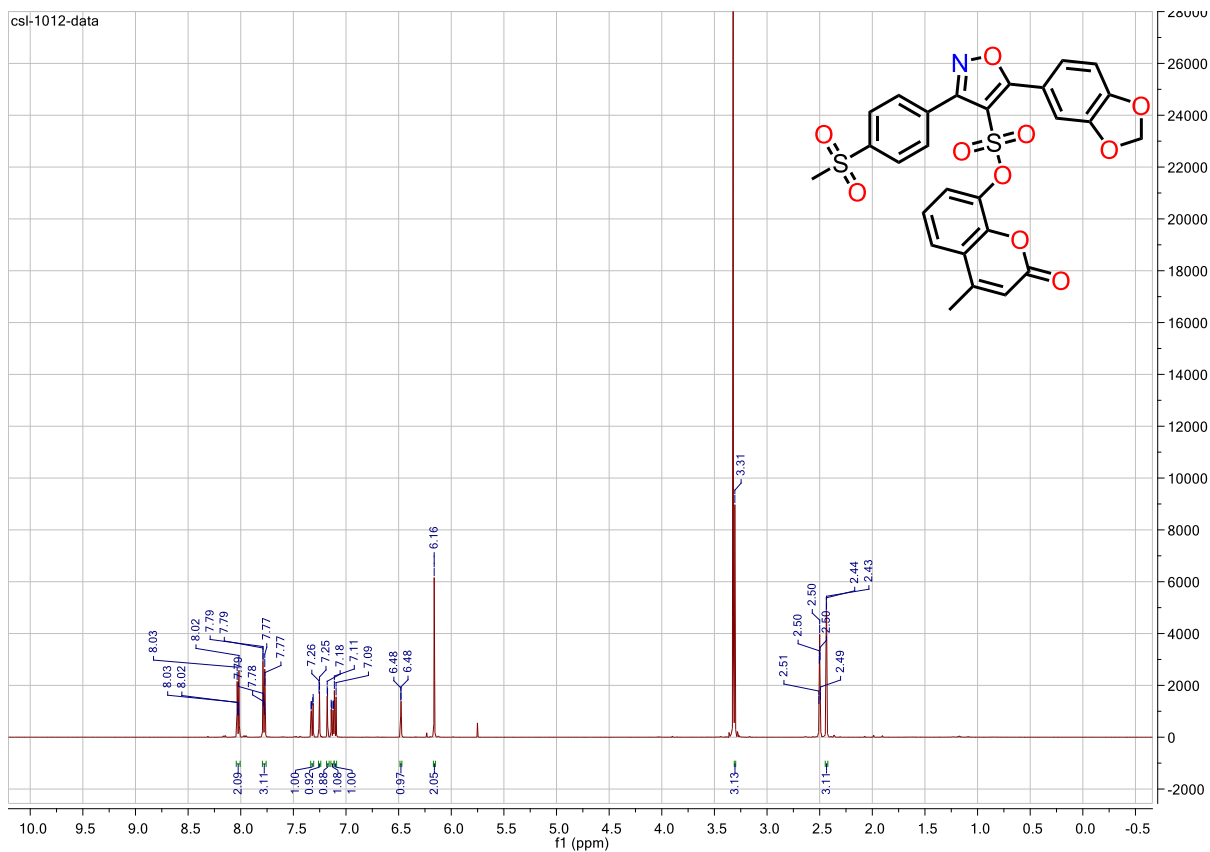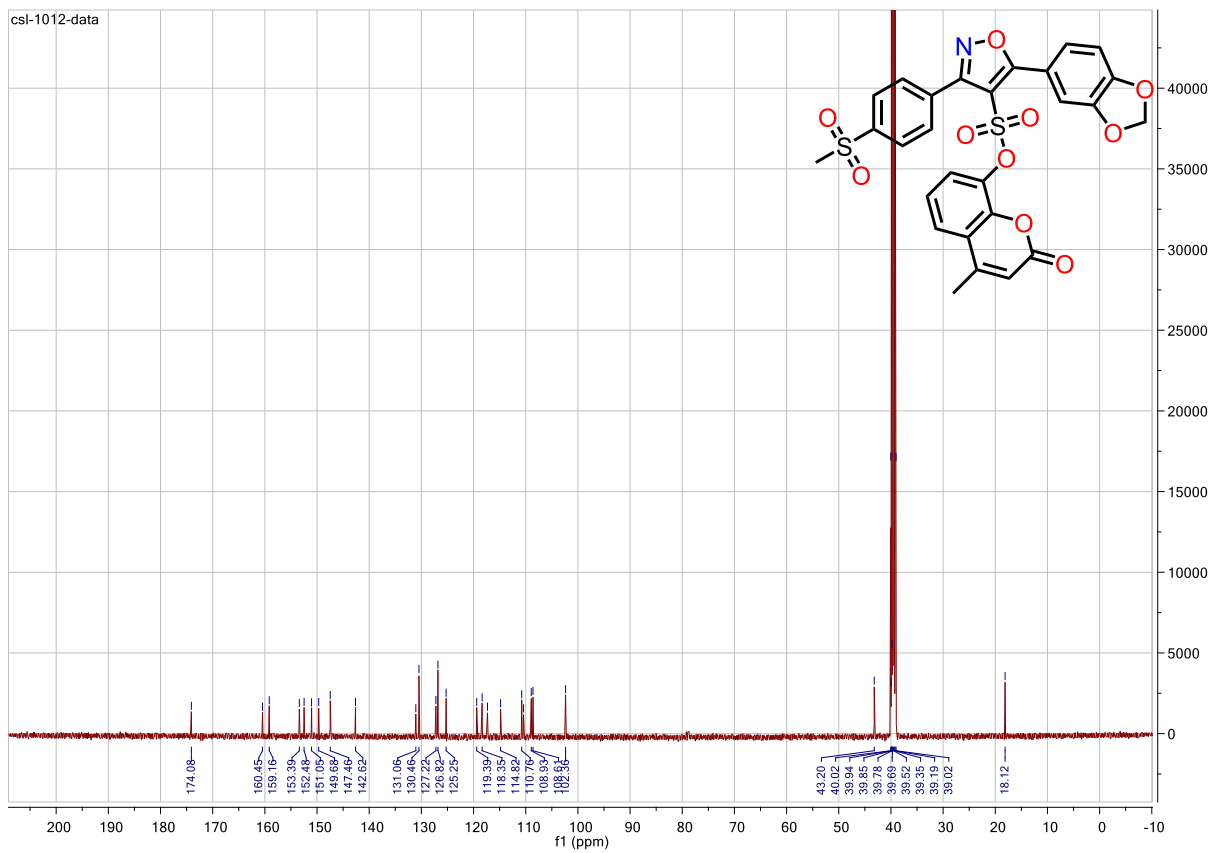





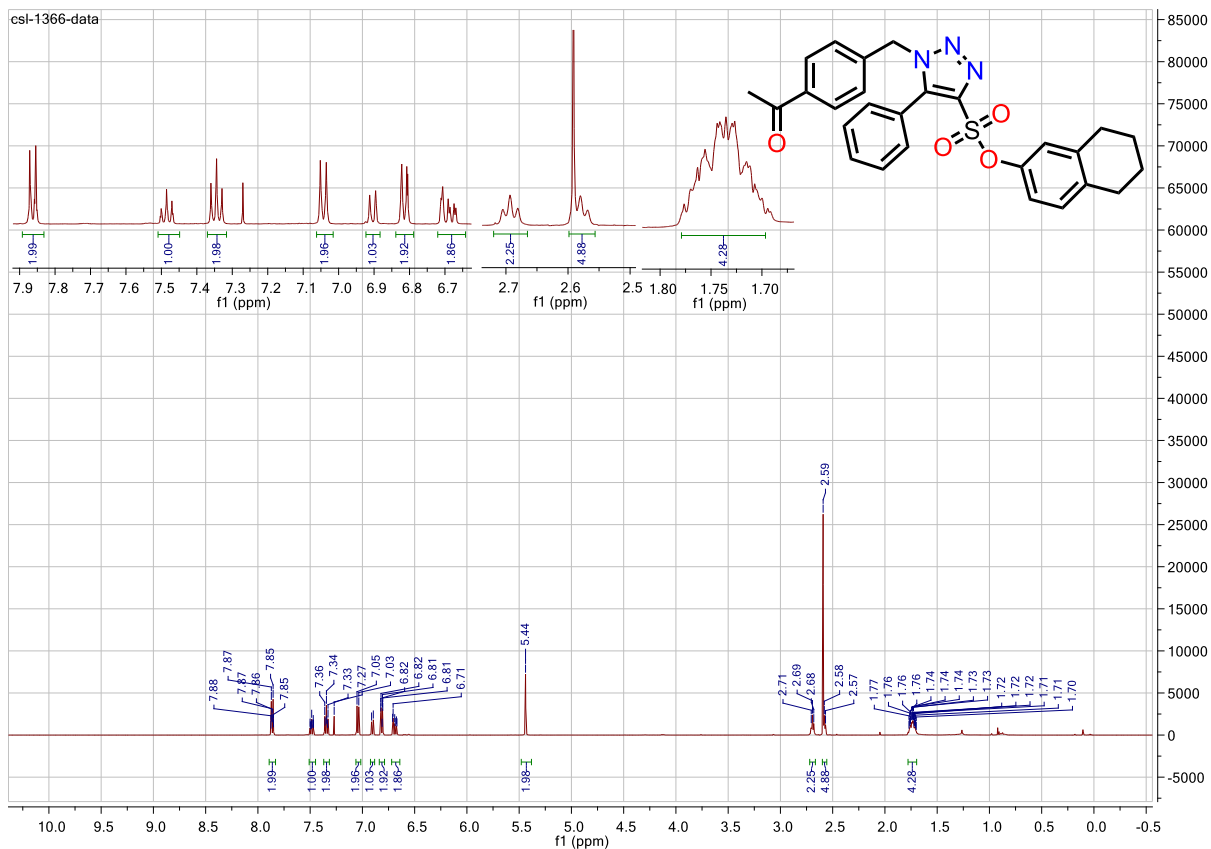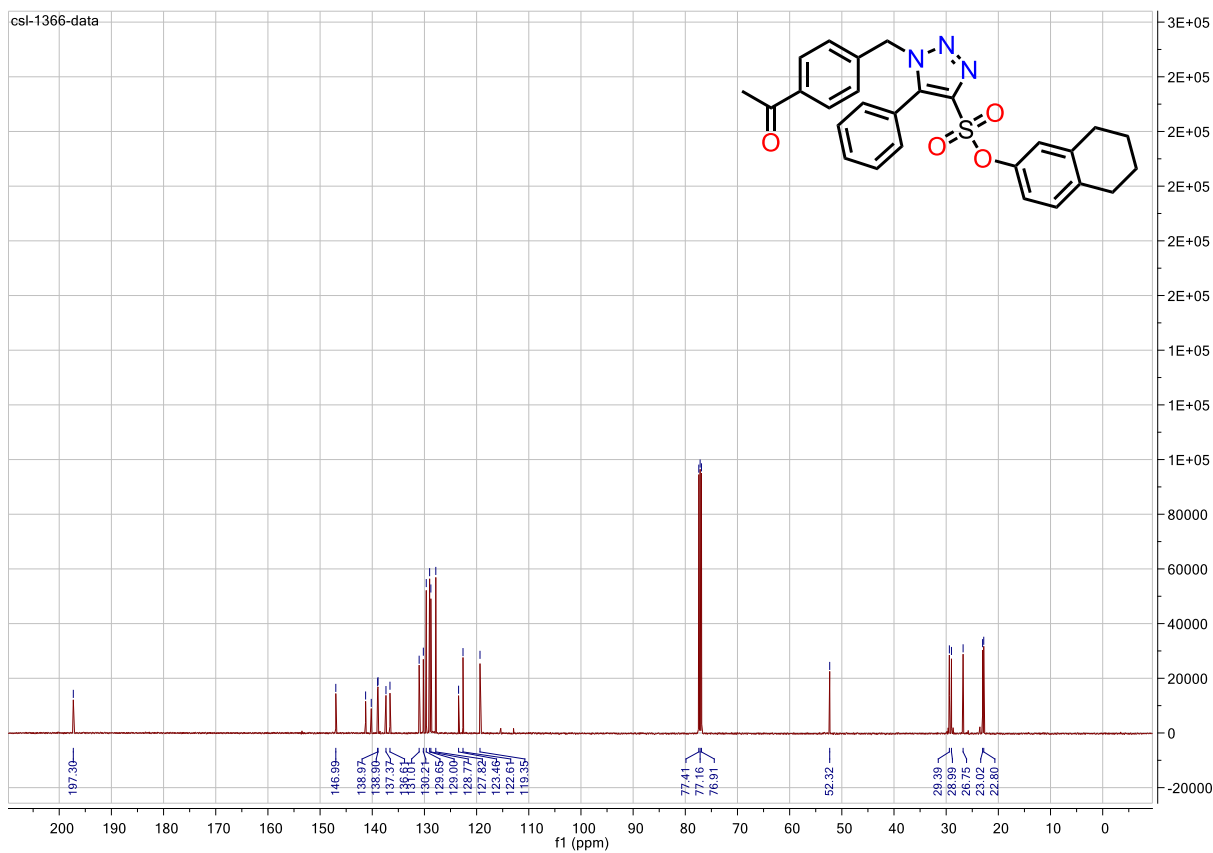

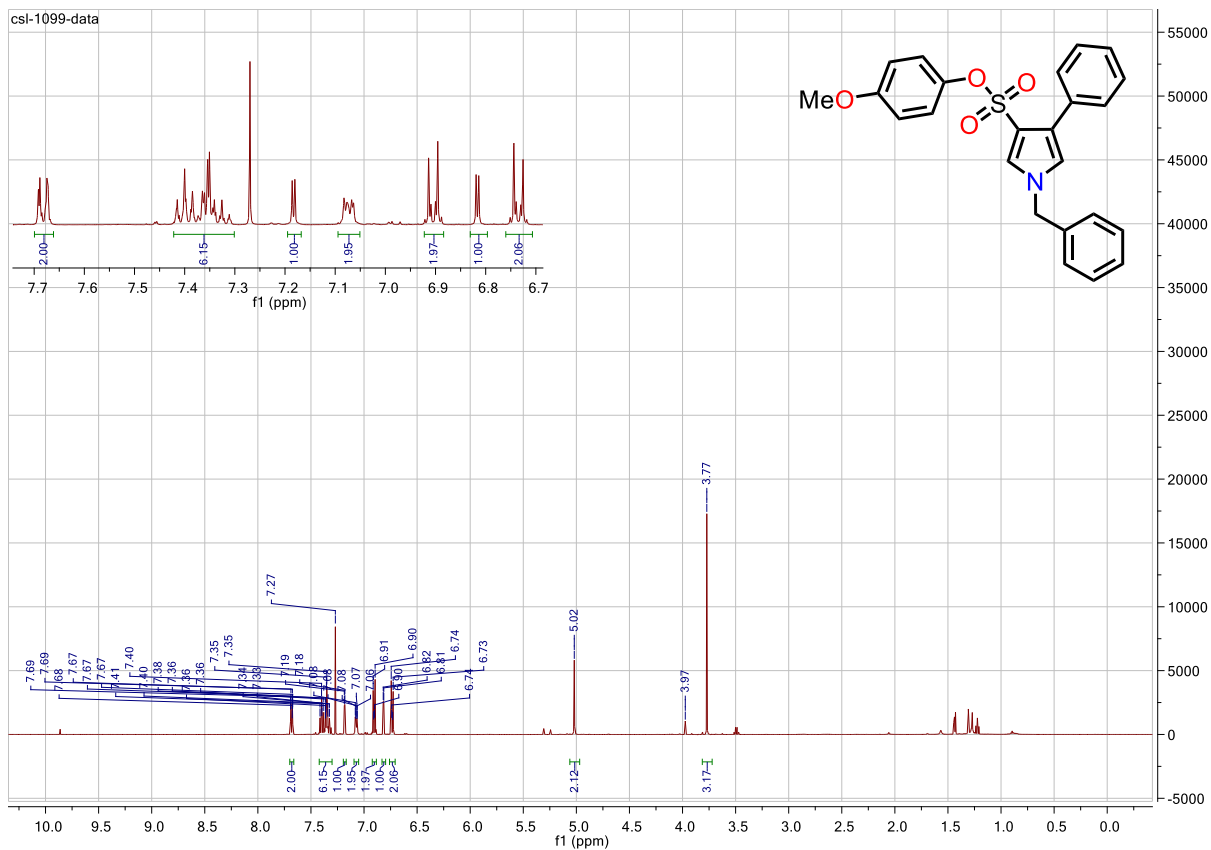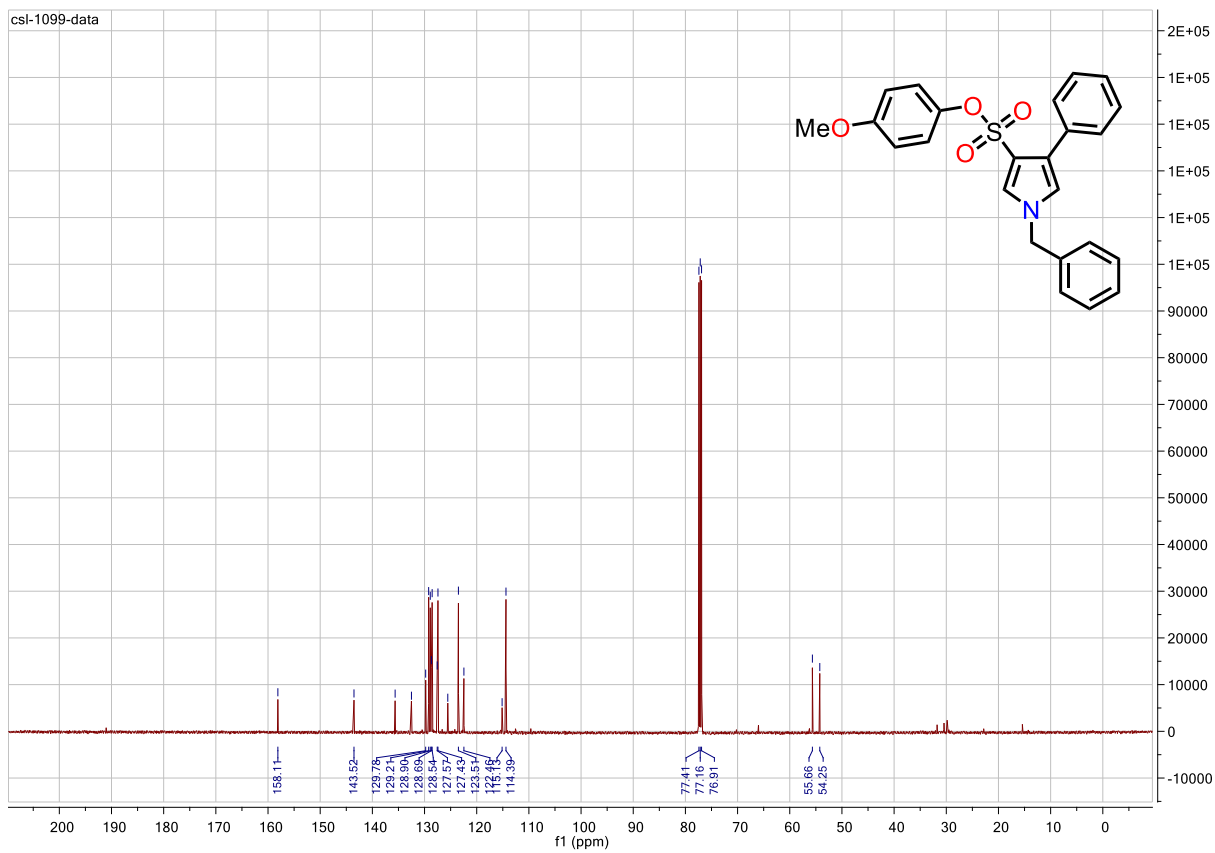

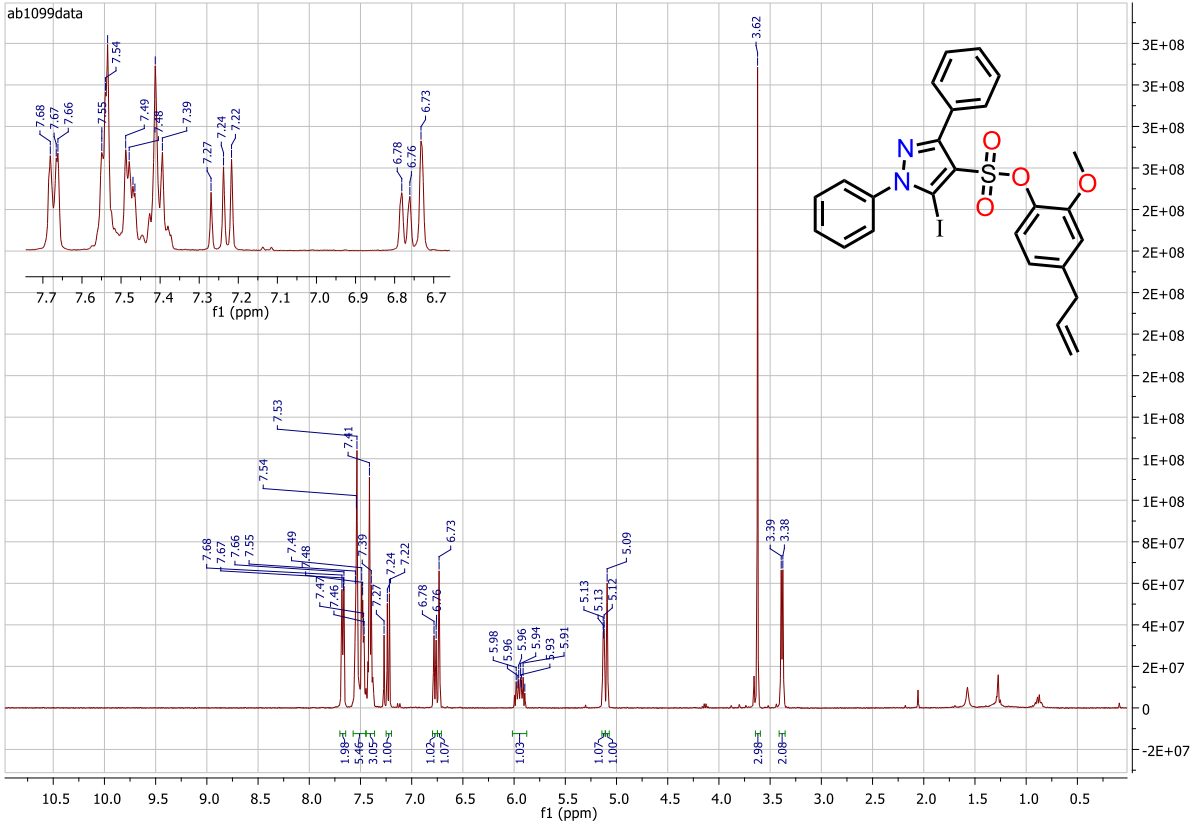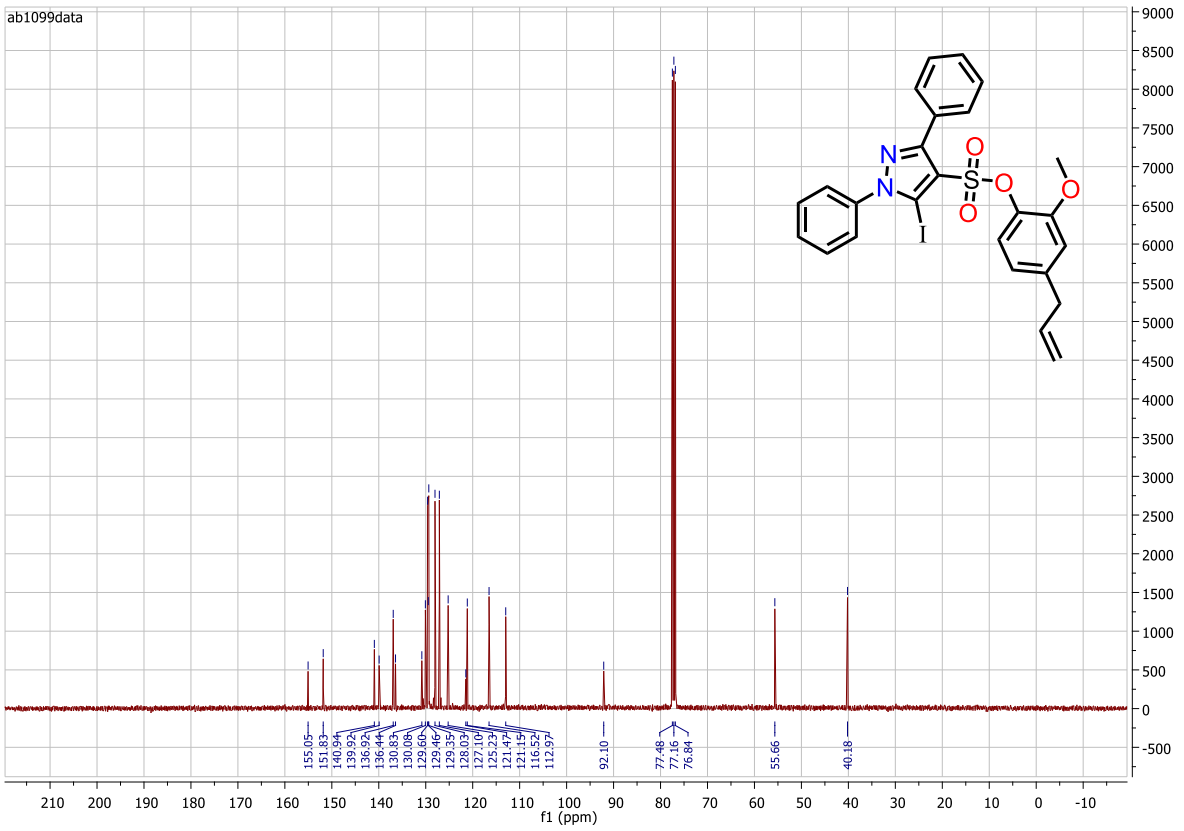

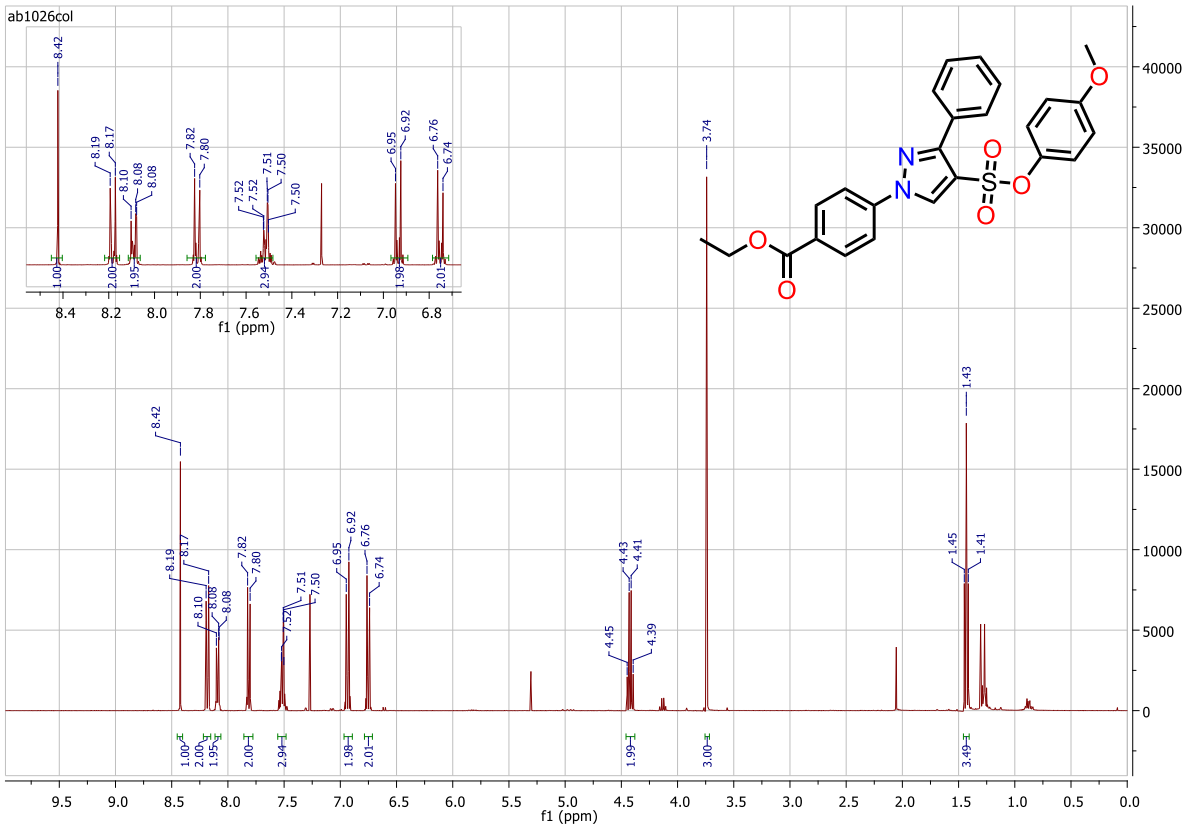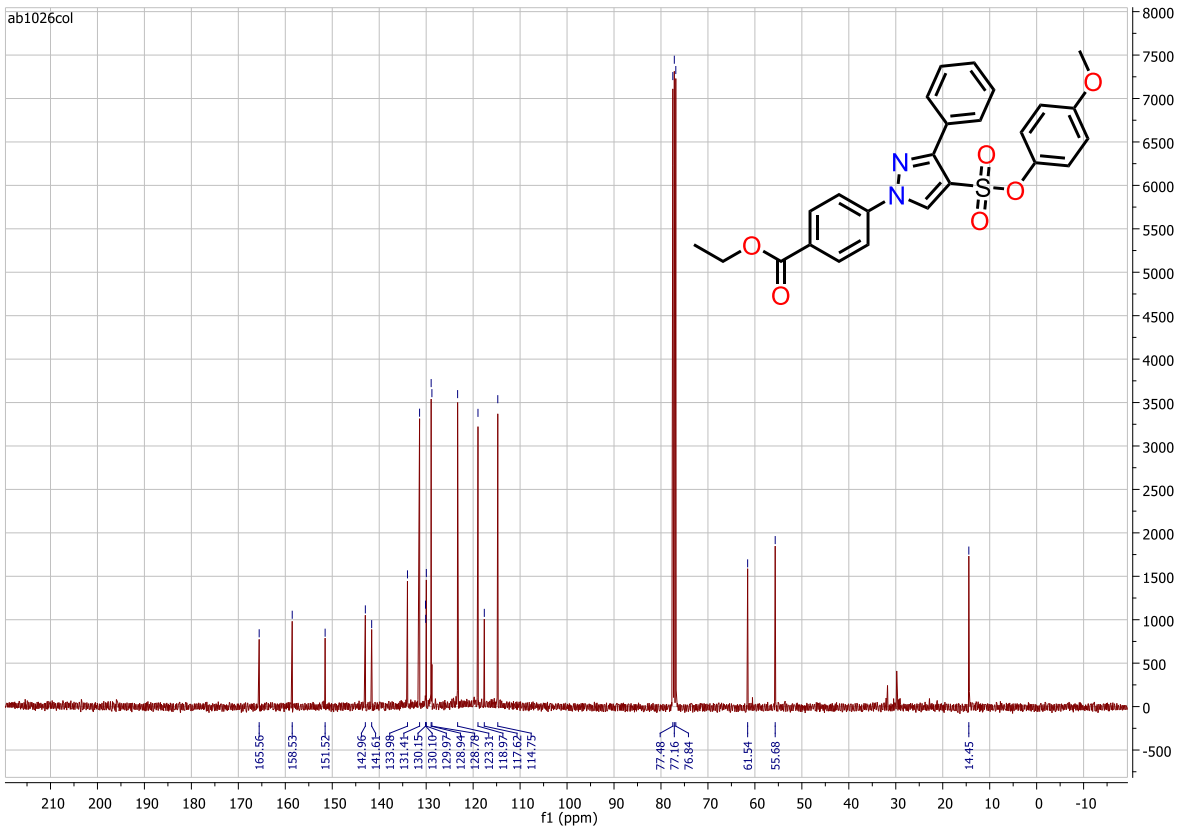

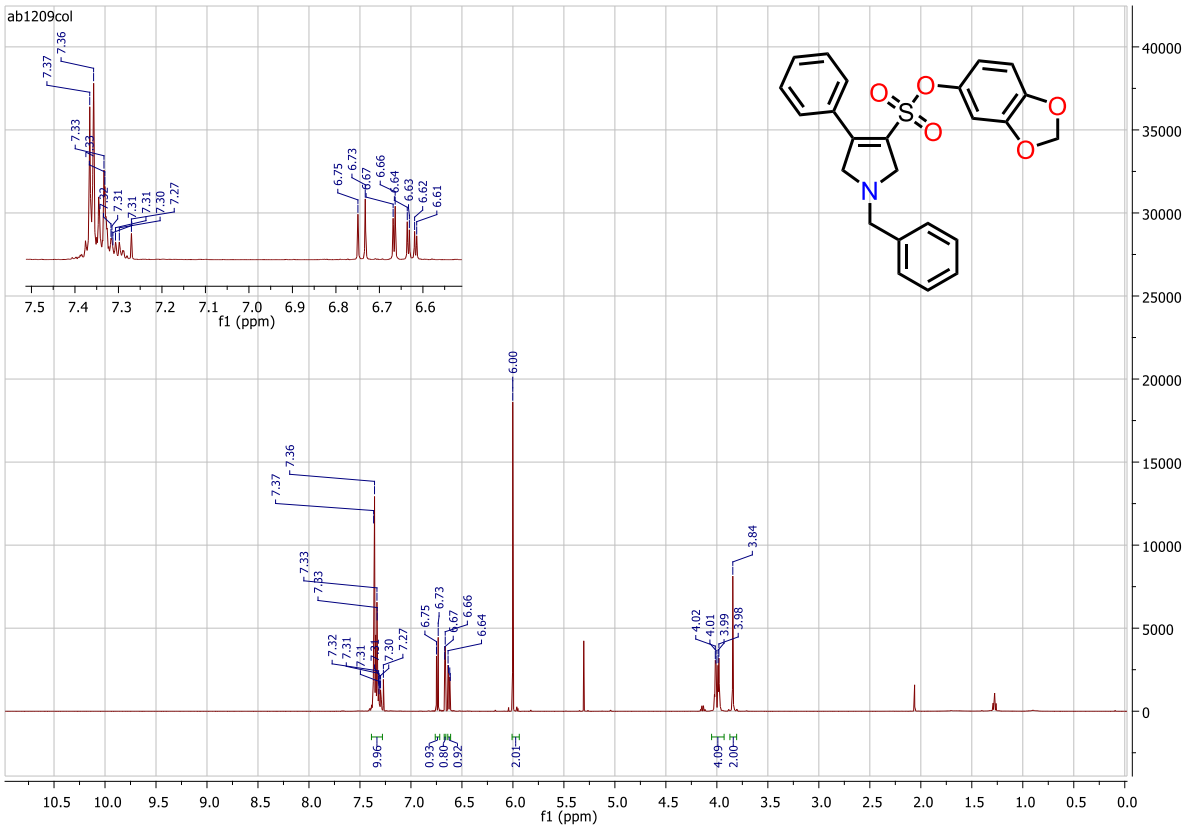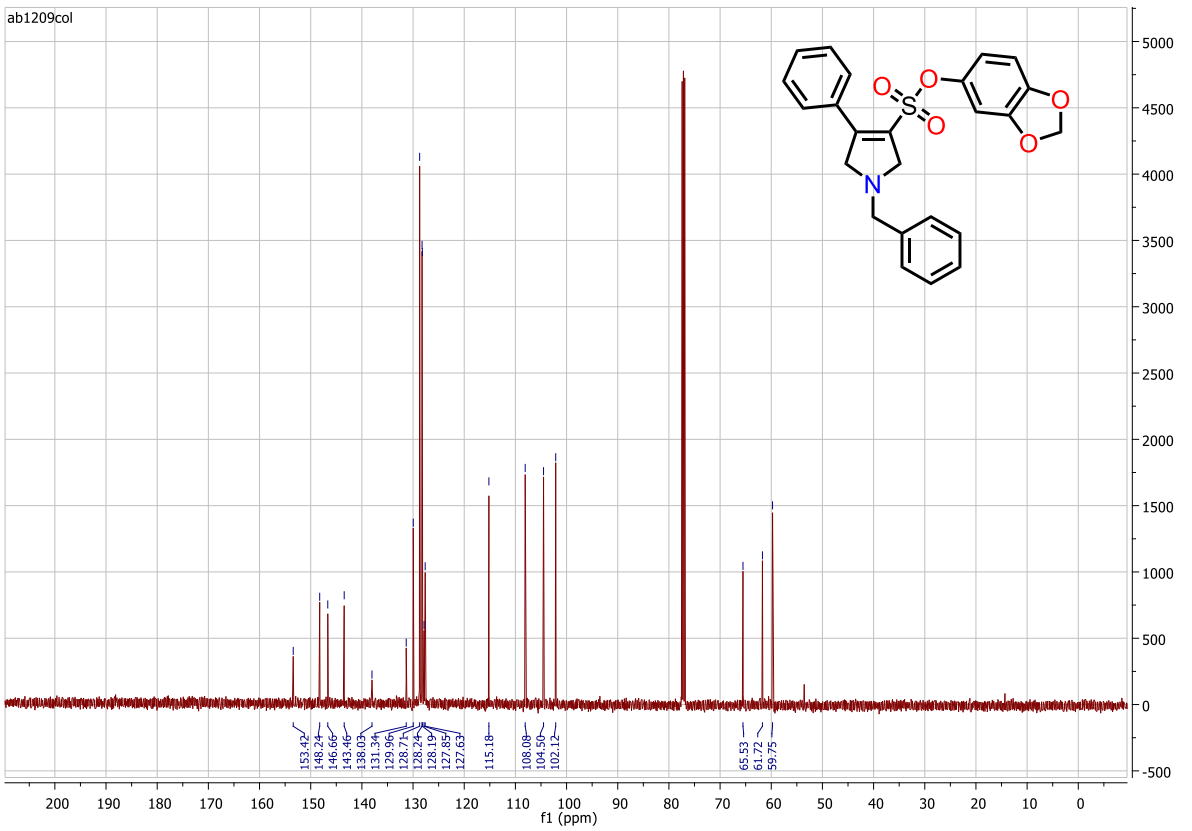

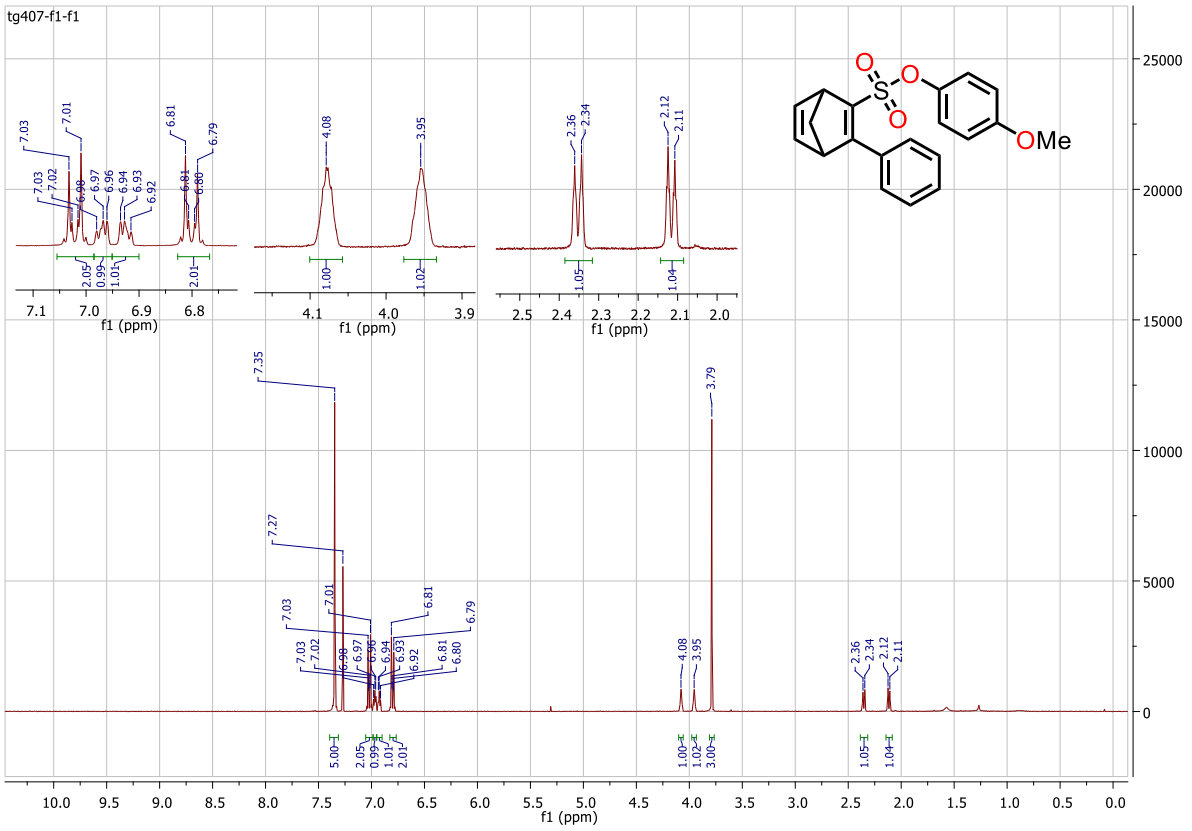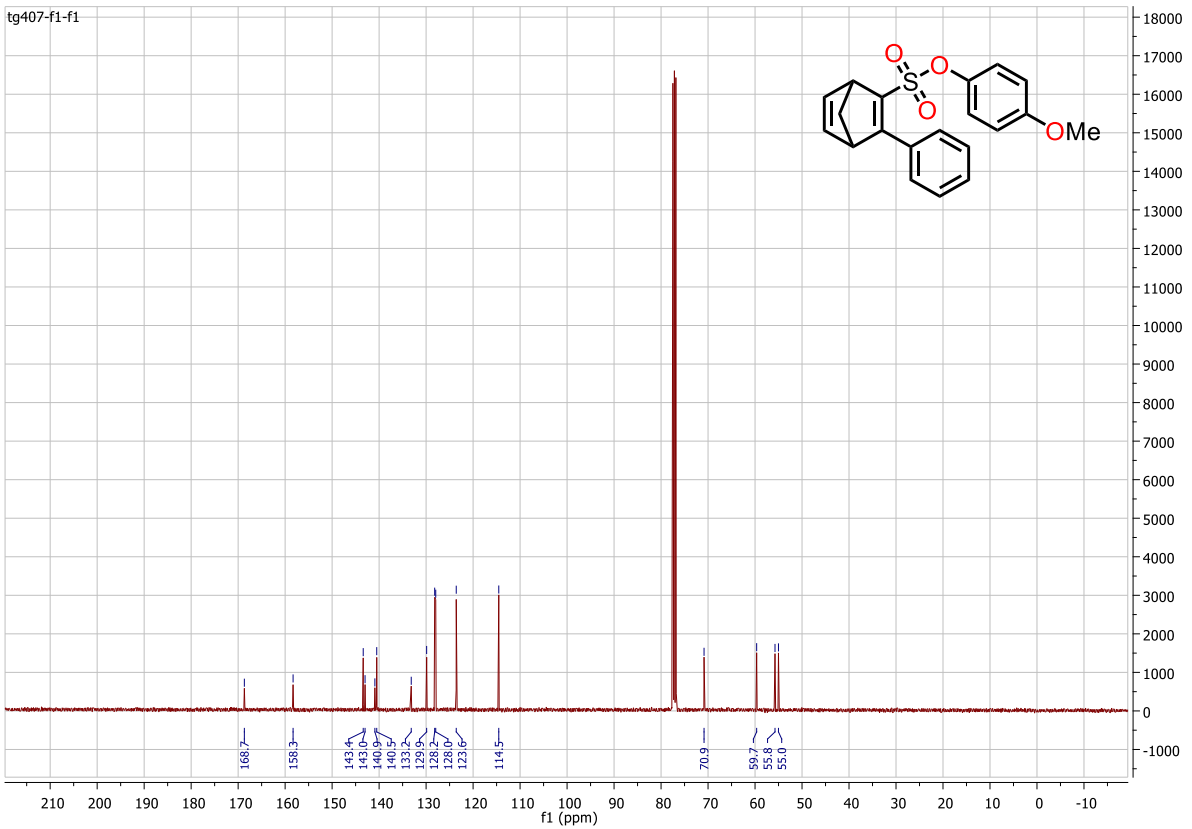

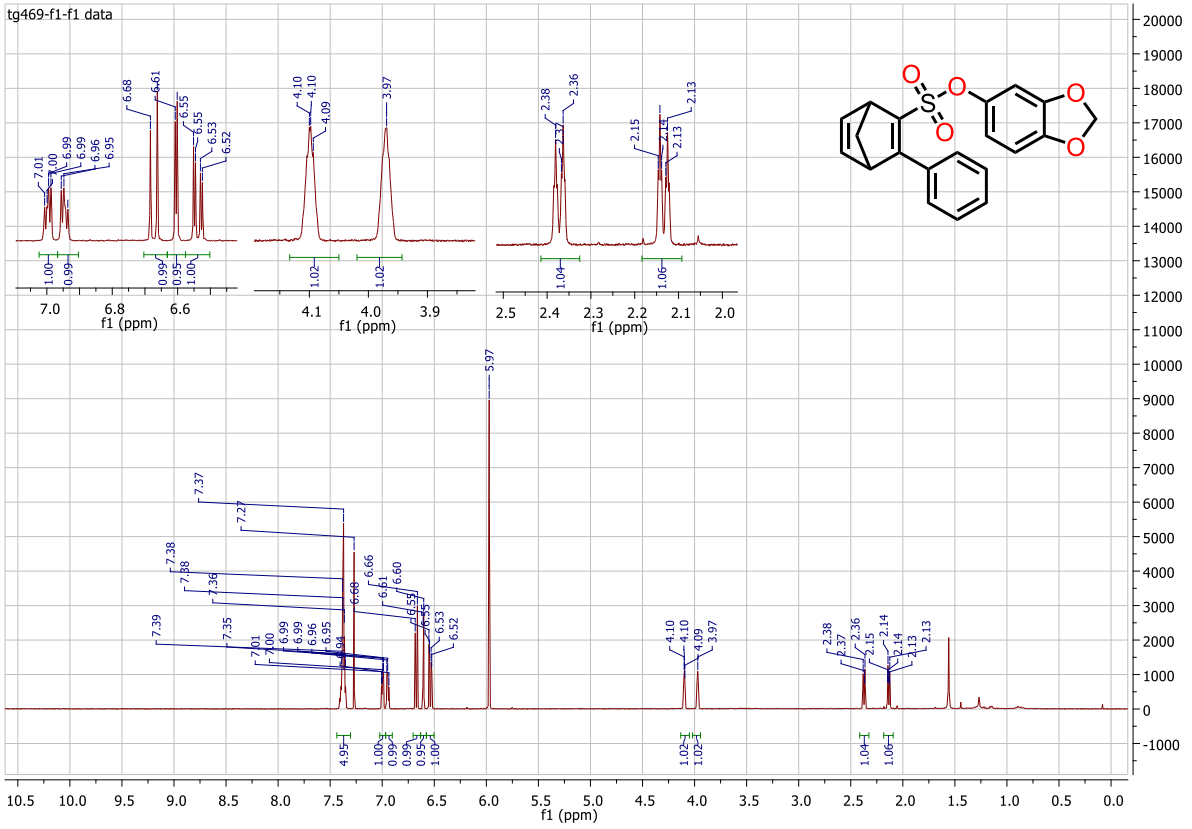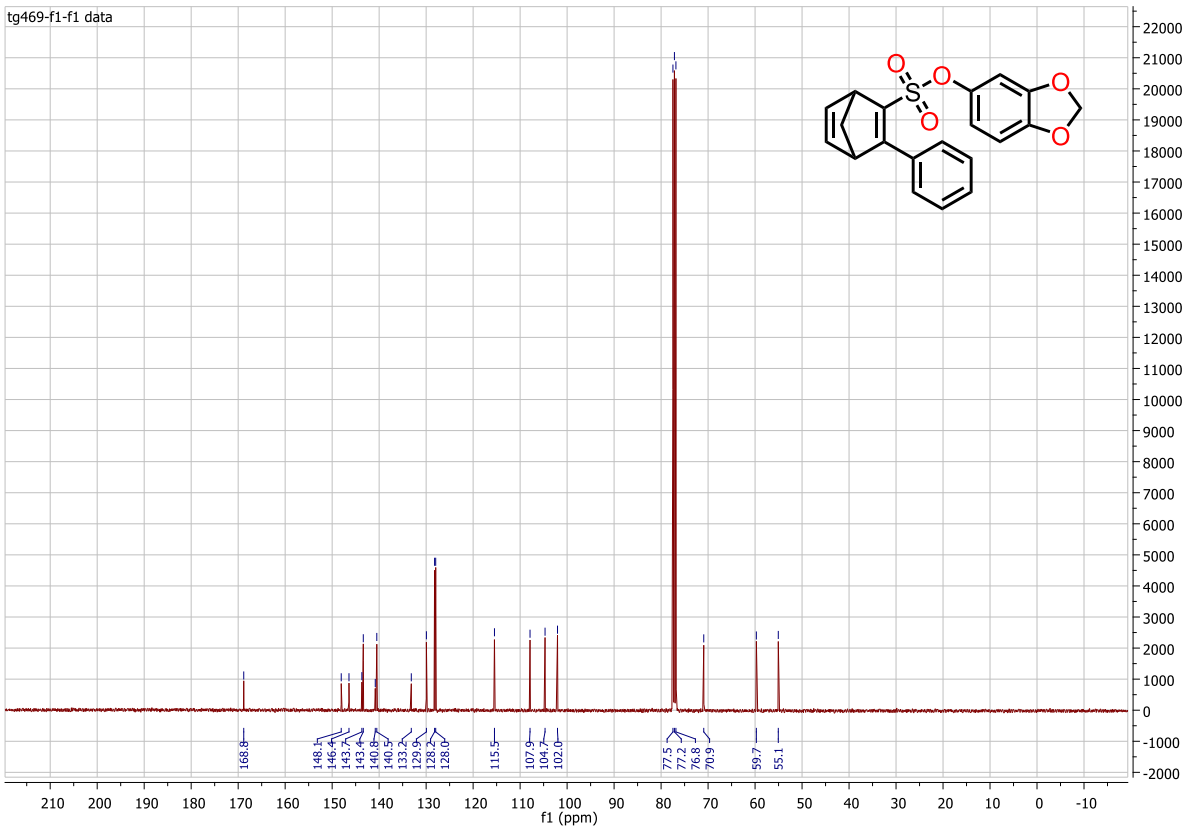



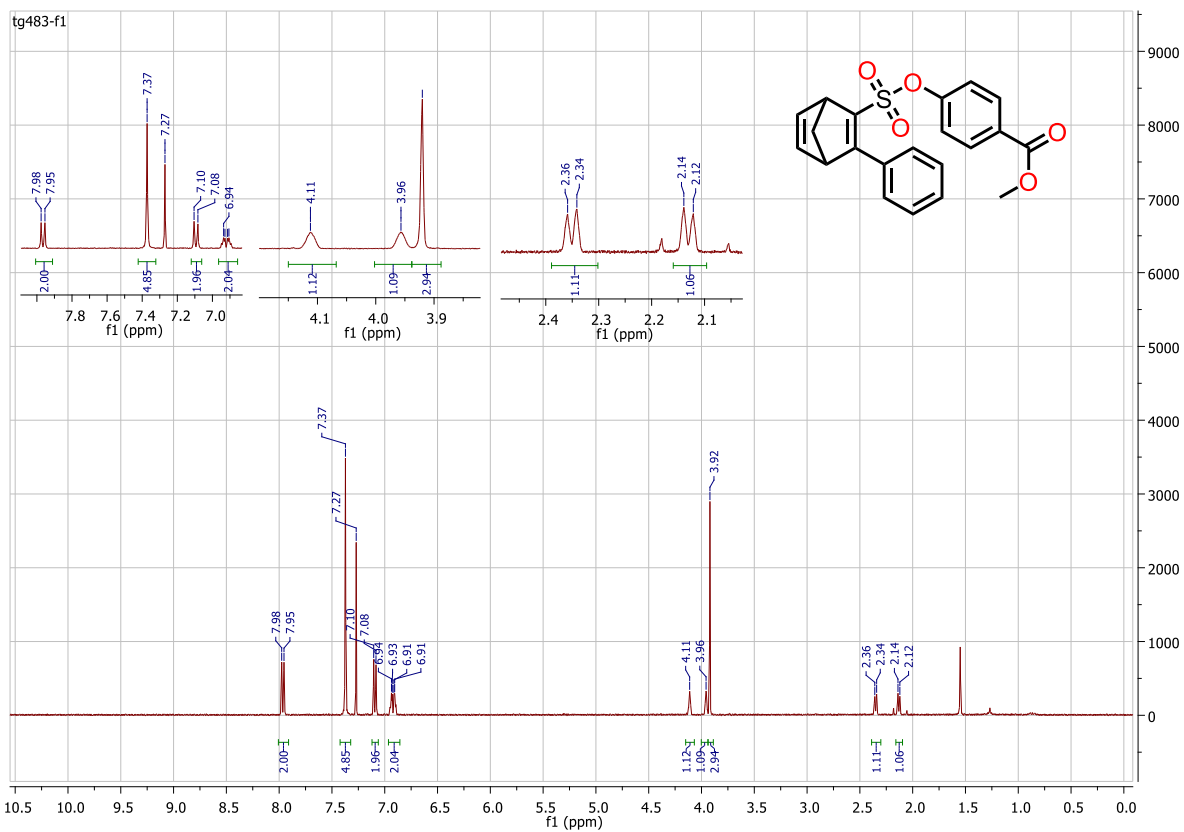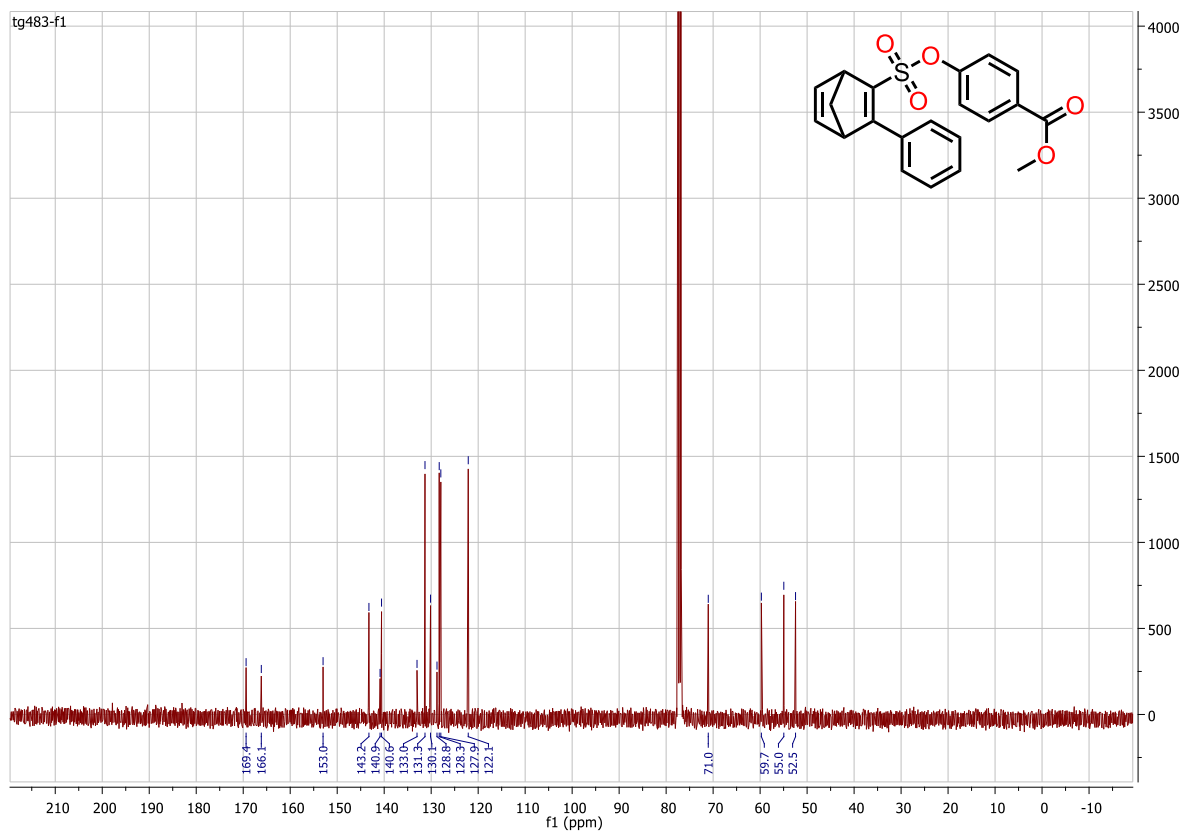

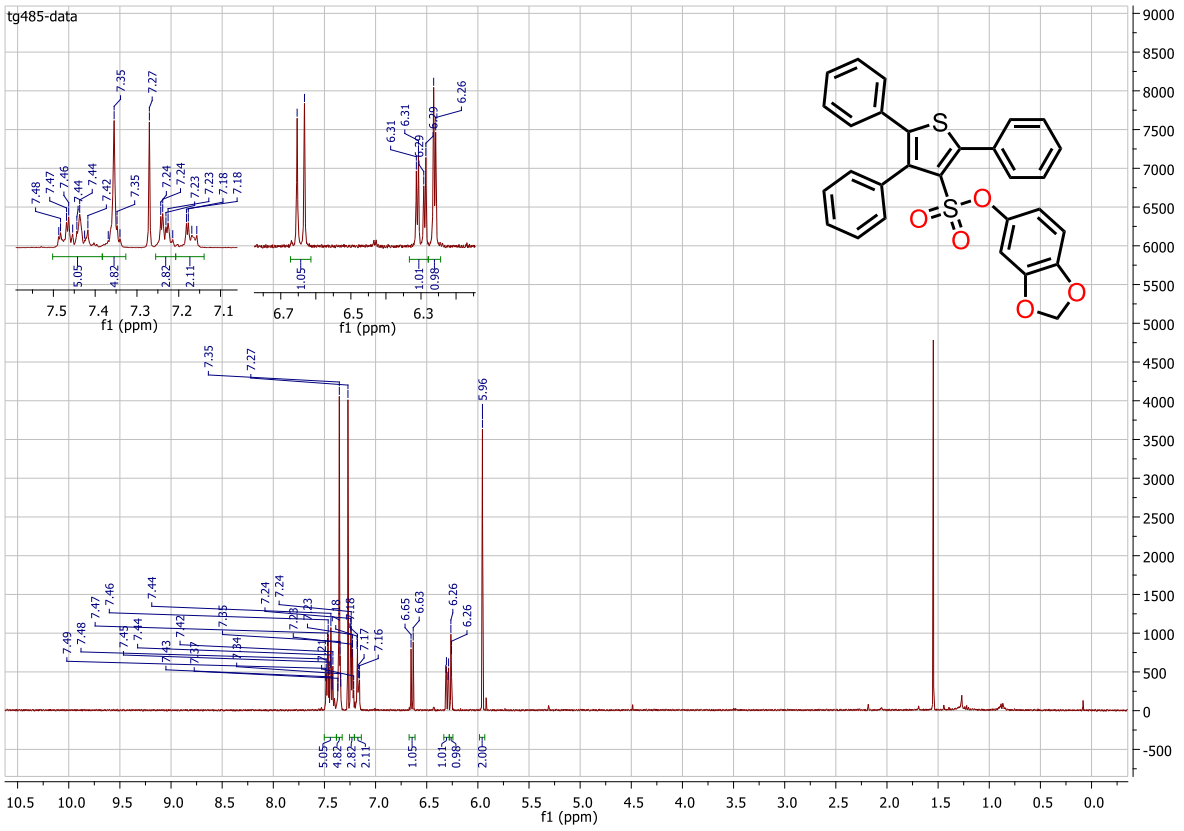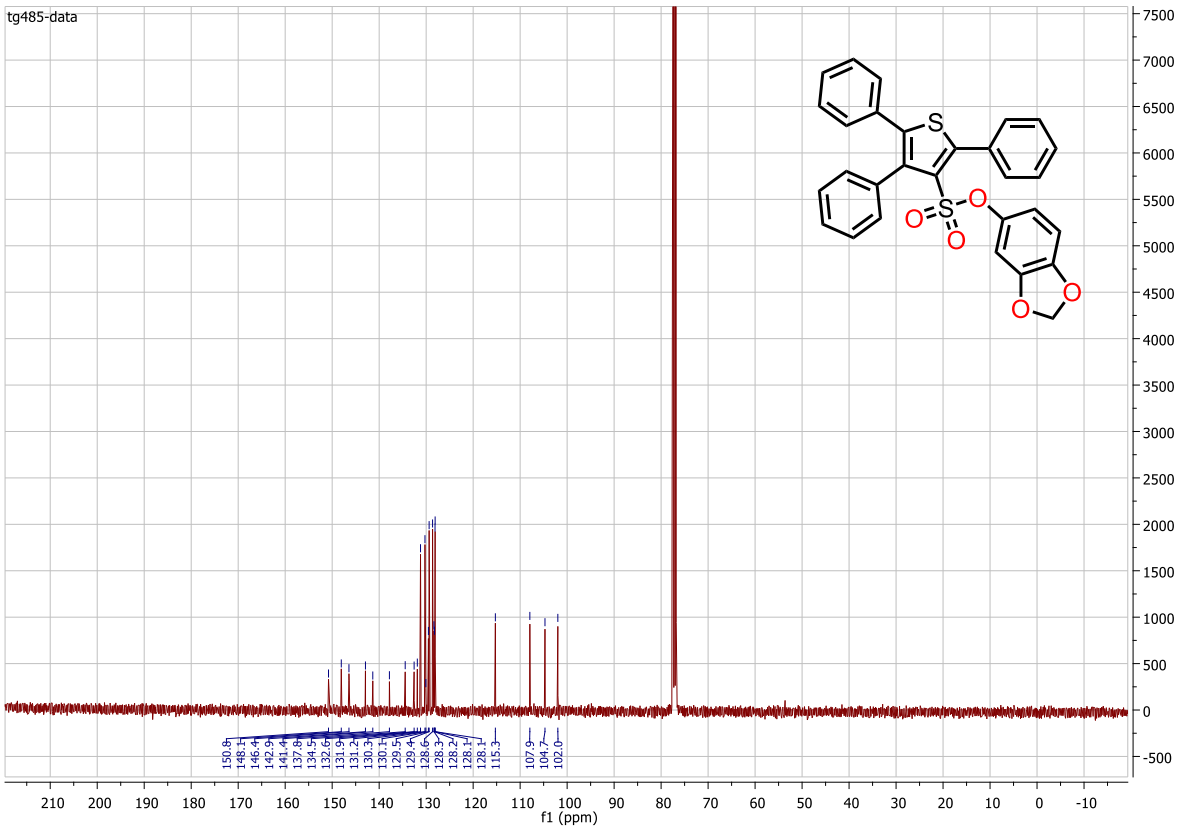

Supplement: NIHMS1613906-supplement-sup_info.pdf [file NIHMS1613906-supplement-sup_info.pdf]
